# Supplementary material for: Decoding the Effects of Bexarotene treatment on brain of AD-like model mice: Single-Cell Transcriptomics and Chromatin Accessibility Analysis
Source: Research Square preprint supplement (doi:10.21203/rs.3.rs-7201032/v1), 2025-08-13
Supplement: Supplementary file 1 [file 1c04e755a0001b3306e9beb7.xlsx]

## Sheet: DEG_Astrocytes
SYMBOL	p_val	avg_log2FC	pct.1	pct.2	p_val_adj
C1qb	1.42189e-51	0.227192	0.23	0.114	2.71738e-47
Ttr	2.17242e-50	0.586473	0.61	0.486	4.15171e-46
C1qa	4.12826e-42	0.205292	0.218	0.115	7.88952e-38
Hbb-bs	5.16196e-42	-0.199275	0.109	0.205	9.86502e-38
Tprkb	3.49239e-30	-0.223209	0.755	0.807	6.6743e-26
Fam181b	5.24437e-30	0.210934	0.643	0.543	1.00225e-25
C1qc	7.47382e-29	0.115384	0.129	0.063	1.42832e-24
AC149090.1	1.28331e-27	0.14793	0.618	0.507	2.45253e-23
Lrrc8c	7.3959e-27	0.17802	0.381	0.278	1.41343e-22
Hes5	8.86768e-27	0.329576	0.662	0.576	1.6947e-22
Mfge8	2.28687e-25	0.181132	0.98	0.978	4.37044e-21
Mgll	3.6319e-25	0.188805	0.908	0.864	6.94093e-21
Cpe	6.30931e-25	-0.170168	0.998	1	1.20577e-20
Slco1c1	1.16336e-24	0.183879	0.966	0.949	2.22329e-20
Fth1	8.60778e-24	-0.218816	0.972	0.977	1.64503e-19
Gstm5	8.73941e-24	-0.231048	0.946	0.95	1.67019e-19
Tubb2a	3.26428e-23	0.221432	0.832	0.78	6.23837e-19
Ctss	3.75186e-23	0.114794	0.105	0.051	7.17018e-19
Hes1	2.60172e-22	0.197462	0.418	0.326	4.97215e-18
Htra1	2.78249e-22	0.158291	0.995	0.994	5.31763e-18
Bsg	8.04699e-22	-0.266472	0.783	0.809	1.53786e-17
Hba-a2	3.51462e-21	-0.0560151	0.025	0.063	6.71679e-17
Cyp51	4.62076e-21	0.168221	0.441	0.347	8.83073e-17
Acss2	5.14551e-21	0.168548	0.475	0.382	9.83359e-17
Pde10a	6.33969e-21	0.366869	0.488	0.434	1.21158e-16
Tsc22d3	8.68056e-21	0.170266	0.807	0.74	1.65894e-16
Hba-a1	2.02697e-20	-0.0993829	0.056	0.107	3.87374e-16
Igfbp2	2.45773e-20	0.26396	0.529	0.458	4.69697e-16
Hmgcr	6.83964e-20	0.157691	0.701	0.62	1.30712e-15
Ppp1r3g	2.20704e-19	0.172106	0.535	0.449	4.21787e-15
Hexb	2.5474e-19	0.148252	0.407	0.318	4.86834e-15
Sox2	3.44364e-19	0.155685	0.814	0.753	6.58114e-15
Fcrls	3.90726e-19	0.0721826	0.059	0.022	7.46716e-15
Mat2a	3.99448e-19	0.123096	0.84	0.77	7.63384e-15
Thrsp	1.12498e-18	0.201469	0.67	0.596	2.14995e-14
Hbb-bt	1.16358e-18	-0.0570016	0.019	0.051	2.22373e-14
Dynll1	1.26422e-18	0.160258	0.75	0.679	2.41604e-14
Ppp1r3c	2.59533e-18	0.158899	0.549	0.465	4.95994e-14
S100b	9.56616e-18	-0.148835	0.727	0.737	1.82819e-13
Hif3a	2.51724e-17	0.131712	0.394	0.311	4.8107e-13
Vav3	2.54359e-17	0.149239	0.619	0.536	4.86105e-13
Ddit4l	4.33178e-17	0.121837	0.278	0.205	8.27846e-13
Mvd	4.81943e-17	0.111132	0.241	0.171	9.21042e-13
Trem2	4.88066e-17	0.0779227	0.081	0.04	9.32743e-13
Fdps	5.1161e-17	0.132119	0.364	0.282	9.77738e-13
Atf4	6.40064e-17	0.106188	0.253	0.181	1.22323e-12
Prex2	9.51952e-17	-0.161057	0.981	0.988	1.81928e-12
Lhfp	2.01412e-16	0.187418	0.678	0.61	3.84918e-12
Rida	2.28448e-16	-0.142612	0.506	0.538	4.36587e-12
Tyrobp	2.45095e-16	0.0932159	0.117	0.068	4.68401e-12
Dhcr7	2.60013e-16	0.11038	0.294	0.22	4.96911e-12
Clu	2.99482e-16	-0.200487	0.986	0.99	5.7234e-12
Hspa5	3.92931e-16	0.131915	0.751	0.683	7.50931e-12
Sox21	6.5162e-16	0.0883861	0.302	0.23	1.24531e-11
1700017B05Rik	1.01507e-15	0.0791059	0.141	0.088	1.93989e-11
Scd1	1.44256e-15	0.111098	0.221	0.156	2.75688e-11
Paqr7	2.54059e-15	0.113404	0.557	0.475	4.85532e-11
Etv4	4.06901e-15	0.0967187	0.345	0.27	7.77628e-11
Nnat	6.73273e-15	-0.205824	0.518	0.571	1.28669e-10
Chst2	8.96455e-15	0.111058	0.791	0.725	1.71321e-10
Fez1	1.02257e-14	0.150013	0.754	0.695	1.95423e-10
Cx3cr1	1.48525e-14	0.0715175	0.077	0.04	2.83846e-10
Olig2	1.51972e-14	0.0851824	0.138	0.087	2.90434e-10
Cbr3	1.66638e-14	0.0971462	0.406	0.33	3.18461e-10
Elovl6	2.12226e-14	0.116867	0.324	0.252	4.05586e-10
Dnajc3	2.41263e-14	0.10843	0.541	0.461	4.61077e-10
Timm10	2.57969e-14	0.110274	0.224	0.162	4.93004e-10
Dusp6	3.37086e-14	0.0808942	0.16	0.106	6.44206e-10
Trib2	4.48054e-14	0.106959	0.29	0.222	8.56276e-10
Phka1	4.53001e-14	0.149731	0.792	0.739	8.6573e-10
Adgrg1	5.48254e-14	0.120749	0.469	0.392	1.04777e-09
Rgs10	6.78626e-14	0.0676287	0.065	0.032	1.29692e-09
Nfkbia	6.92404e-14	0.103592	0.368	0.294	1.32325e-09
Gpr34	8.01303e-14	0.0593734	0.054	0.024	1.53137e-09
Mrps6	9.96656e-14	0.100248	0.274	0.208	1.90471e-09
Nupr1	1.22585e-13	0.137451	0.282	0.216	2.34273e-09
Abca1	1.88591e-13	-0.122201	0.704	0.713	3.60416e-09
Nkain4	2.30671e-13	-0.153134	0.806	0.825	4.40835e-09
Hspa8	2.59958e-13	0.12309	0.907	0.884	4.96807e-09
Son	2.63664e-13	-0.130206	0.988	0.989	5.03889e-09
Cpeb4	2.74512e-13	0.120644	0.831	0.777	5.24621e-09
Fdft1	3.25884e-13	0.112661	0.606	0.531	6.22797e-09
Mid1ip1	3.29654e-13	0.140164	0.759	0.702	6.30002e-09
Vcam1	3.35814e-13	0.106052	0.625	0.551	6.41774e-09
Syncrip	3.55547e-13	0.0727544	0.332	0.266	6.79486e-09
Selplg	3.74083e-13	0.047616	0.045	0.018	7.1491e-09
Nrgn	3.94008e-13	-0.110626	0.128	0.182	7.52989e-09
Zfp36l1	4.22023e-13	0.123229	0.629	0.559	8.06528e-09
Acly	5.2316e-13	0.0845944	0.279	0.214	9.99812e-09
Fam89b	5.59145e-13	0.0550005	0.135	0.091	1.06858e-08
Id2	7.94234e-13	0.142924	0.907	0.892	1.51786e-08
Plekhg1	8.14933e-13	0.136549	0.818	0.767	1.55742e-08
Irf2bpl	8.22552e-13	0.0703636	0.23	0.173	1.57198e-08
Insig1	8.55811e-13	0.120782	0.49	0.417	1.63554e-08
Irf2bp2	1.12589e-12	0.0921894	0.314	0.247	2.15169e-08
Calm3	1.23801e-12	-0.113363	0.536	0.549	2.36597e-08
Pou3f3	1.24681e-12	0.092397	0.737	0.67	2.38279e-08
Rmst	1.29707e-12	0.172954	0.887	0.85	2.47883e-08
Srrm2	1.30688e-12	0.0919688	0.839	0.786	2.49758e-08
Ptprj	1.31163e-12	0.137671	0.304	0.242	2.50665e-08
Xbp1	1.5793e-12	0.0884097	0.24	0.179	3.01819e-08
Chchd3	1.62242e-12	0.0498822	0.76	0.695	3.1006e-08
Abcb9	1.76199e-12	0.0900499	0.297	0.232	3.36734e-08
P2ry12	1.81266e-12	0.0840327	0.133	0.091	3.46418e-08
Camk2n1	1.94837e-12	-0.119715	0.8	0.808	3.72352e-08
Emx2	2.39884e-12	0.0859769	0.383	0.314	4.58443e-08
Efhd2	3.02645e-12	0.0524324	0.496	0.431	5.78386e-08
Slc7a2	3.2456e-12	0.0829759	0.474	0.403	6.20266e-08
Pmvk	3.49994e-12	0.120356	0.313	0.249	6.68874e-08
Ndrg2	3.64393e-12	-0.128517	0.968	0.975	6.96391e-08
Fxyd1	4.5733e-12	-0.146554	0.787	0.81	8.74004e-08
Hook3	4.75738e-12	0.0954366	0.622	0.551	9.09183e-08
Slc10a7	5.55776e-12	0.0875154	0.309	0.245	1.06214e-07
St13	5.81471e-12	0.0490519	0.64	0.574	1.11125e-07
Magt1	5.89985e-12	0.0684229	0.265	0.207	1.12752e-07
Epn2	7.28533e-12	0.0891443	0.366	0.298	1.3923e-07
Fzd2	7.43165e-12	0.0932466	0.709	0.643	1.42026e-07
Jagn1	9.1882e-12	0.074136	0.238	0.181	1.75596e-07
Dync1i2	1.34467e-11	0.07133	0.654	0.586	2.56981e-07
Fcer1g	1.37282e-11	0.0569416	0.066	0.035	2.6236e-07
Tmcc1	1.85625e-11	0.105176	0.858	0.812	3.54748e-07
Kcnn2	1.86864e-11	0.0987972	0.923	0.886	3.57115e-07
Tmem246	2.21009e-11	0.0675118	0.272	0.214	4.22371e-07
Pi4k2a	2.30509e-11	0.0639559	0.184	0.134	4.40525e-07
Cth	2.35468e-11	0.0829185	0.252	0.194	4.50002e-07
Gm48606	2.45643e-11	-0.0775458	0.086	0.128	4.69448e-07
Rin2	2.51013e-11	0.0502333	0.516	0.452	4.79712e-07
Nr1d1	2.59251e-11	0.103166	0.463	0.393	4.95455e-07
Ndp	2.78834e-11	0.0861141	0.281	0.22	5.32879e-07
Abhd17b	3.01576e-11	0.0848455	0.39	0.324	5.76343e-07
Klhl9	3.12788e-11	0.0851496	0.298	0.236	5.9777e-07
Klf7	3.4644e-11	0.0917699	0.426	0.358	6.62081e-07
Rbbp6	3.63761e-11	0.0719845	0.385	0.322	6.95185e-07
Tra2a	3.92162e-11	0.078072	0.688	0.621	7.49461e-07
Sec24b	4.06376e-11	0.0793823	0.261	0.203	7.76625e-07
Sec61a1	4.12097e-11	0.0606589	0.207	0.156	7.87558e-07
Pcyt2	4.18336e-11	0.107621	0.432	0.364	7.99482e-07
Trib1	4.31638e-11	0.0669198	0.152	0.105	8.24903e-07
Ly86	4.7163e-11	0.0565072	0.049	0.023	9.01332e-07
Cnbp	5.22609e-11	0.0822048	0.648	0.58	9.98757e-07
Tmem11	6.31263e-11	0.0754679	0.211	0.158	1.20641e-06
Pstk	6.77079e-11	0.0724631	0.258	0.201	1.29397e-06
Pou3f4	7.58432e-11	0.0679555	0.218	0.165	1.44944e-06
Msl2	7.58593e-11	0.0606027	0.174	0.127	1.44975e-06
Pelo	8.32208e-11	0.0585806	0.094	0.058	1.59043e-06
Pnp	8.42107e-11	0.106657	0.393	0.327	1.60935e-06
Atp6v1g1	8.42572e-11	0.0681066	0.603	0.537	1.61024e-06
Synpo2	9.21736e-11	0.105853	0.259	0.201	1.76153e-06
Nck1	9.57841e-11	0.0740545	0.317	0.257	1.83053e-06
Mras	9.65046e-11	0.100153	0.774	0.721	1.8443e-06
Pcbp1	1.03691e-10	0.0790926	0.41	0.344	1.98163e-06
Nr6a1	1.23908e-10	0.0967175	0.241	0.186	2.36801e-06
Mblac2	1.25395e-10	0.0769562	0.211	0.158	2.39642e-06
Hsp90ab1	1.31183e-10	0.12036	0.863	0.824	2.50703e-06
Btbd17	1.37695e-10	0.123579	0.821	0.783	2.63148e-06
Bicd2	1.55463e-10	0.0704104	0.2	0.149	2.97106e-06
Hist1h4d	1.69435e-10	0.0590537	0.205	0.156	3.23807e-06
Ldlr	1.72134e-10	0.0874451	0.272	0.214	3.28965e-06
Imp3	1.77647e-10	0.0914763	0.275	0.217	3.39502e-06
Cyth2	1.88746e-10	0.0548676	0.176	0.13	3.60713e-06
Mrpl12	1.89659e-10	0.0746988	0.29	0.232	3.62458e-06
Fam214a	1.92599e-10	-0.110907	0.408	0.44	3.68077e-06
Stx18	2.05028e-10	0.0675628	0.275	0.219	3.91829e-06
Gem	2.0934e-10	0.113255	0.162	0.12	4.0007e-06
P4ha1	2.10357e-10	0.0642142	0.65	0.585	4.02013e-06
Cox6c	2.18306e-10	-0.133869	0.85	0.863	4.17205e-06
Scara3	2.18762e-10	-0.0890829	0.361	0.384	4.18077e-06
Lama3	2.2319e-10	0.115352	0.378	0.314	4.26538e-06
Prxl2a	2.42569e-10	-0.12418	0.83	0.85	4.63574e-06
Snap25	2.45129e-10	-0.0901709	0.142	0.192	4.68467e-06
Rapgef3	2.47935e-10	0.068884	0.491	0.427	4.73829e-06
Pank1	2.47948e-10	0.0807373	0.271	0.213	4.73853e-06
Tomm40	2.48676e-10	0.0568125	0.238	0.187	4.75244e-06
Ccdc50	2.57378e-10	0.0983749	0.701	0.642	4.91875e-06
Cdc5l	2.58488e-10	0.0822022	0.238	0.183	4.93996e-06
Mrpl32	2.92541e-10	0.0708118	0.242	0.188	5.59076e-06
Tiparp	3.09189e-10	0.102569	0.677	0.615	5.9089e-06
Esrra	3.39729e-10	0.0660487	0.194	0.145	6.49257e-06
Pim3	3.3976e-10	0.0670516	0.211	0.16	6.49316e-06
Hsd17b7	3.68182e-10	0.0761113	0.202	0.151	7.03632e-06
Ralgds	3.80106e-10	0.0545581	0.262	0.211	7.2642e-06
Zfand5	3.91894e-10	0.0633375	0.431	0.369	7.48948e-06
Ifrd1	4.20726e-10	0.104348	0.629	0.57	8.0405e-06
Nmt1	4.22338e-10	0.0951656	0.356	0.294	8.0713e-06
Pcp4	4.25754e-10	-0.0788646	0.062	0.096	8.13658e-06
Ptpn2	4.2782e-10	0.0538843	0.201	0.155	8.17606e-06
Mfsd2a	4.32177e-10	0.0851493	0.488	0.423	8.25934e-06
Gm47283	4.42575e-10	0.0868918	0.473	0.407	8.45804e-06
Rad23b	4.91866e-10	0.0472345	0.289	0.238	9.40005e-06
Pdia6	5.00106e-10	0.0716416	0.402	0.34	9.55752e-06
Psmd5	5.75823e-10	0.0544465	0.17	0.126	1.10045e-05
Txnl1	5.7638e-10	0.0739097	0.403	0.341	1.10152e-05
Agfg2	5.86775e-10	0.072165	0.188	0.139	1.12139e-05
Sox8	6.10973e-10	0.076911	0.283	0.226	1.16763e-05
Psmd12	6.26301e-10	0.0398261	0.33	0.278	1.19692e-05
Rpp25l	7.1297e-10	0.0819838	0.261	0.205	1.36256e-05
Dtx1	7.66261e-10	0.0645138	0.226	0.175	1.4644e-05
Hibadh	7.69091e-10	-0.0586311	0.554	0.542	1.46981e-05
Klhl24	7.77969e-10	0.0616087	0.371	0.314	1.48678e-05
Zgpat	8.67596e-10	0.0584606	0.129	0.089	1.65806e-05
Dbx2	8.74442e-10	0.0906268	0.847	0.803	1.67115e-05
Lpin1	8.81949e-10	0.0739161	0.209	0.159	1.68549e-05
2300009A05Rik	9.56524e-10	0.0617461	0.238	0.187	1.82801e-05
Ndufaf4	9.85082e-10	0.0726156	0.369	0.309	1.88259e-05
Cops3	1.03122e-09	0.0725079	0.29	0.234	1.97077e-05
Cct4	1.06351e-09	0.0911568	0.289	0.233	2.03247e-05
Hdhd3	1.09732e-09	0.0398294	0.057	0.03	2.0971e-05
Zswim6	1.10364e-09	0.212879	0.792	0.776	2.10916e-05
Cst3	1.1071e-09	-0.246389	0.999	0.999	2.11578e-05
Arx	1.11902e-09	0.0636891	0.156	0.112	2.13856e-05
Cul3	1.14296e-09	0.0724371	0.481	0.418	2.18432e-05
Alkbh7	1.17241e-09	0.0792679	0.249	0.196	2.24059e-05
Aacs	1.18256e-09	0.0598283	0.14	0.098	2.25998e-05
Krit1	1.34225e-09	0.0636964	0.393	0.334	2.56517e-05
Amer2	1.37973e-09	0.0537313	0.319	0.267	2.6368e-05
Stip1	1.40456e-09	0.0588674	0.207	0.16	2.68425e-05
Gadd45g	1.42336e-09	0.0694438	0.294	0.24	2.72019e-05
Mrpl21	1.48006e-09	0.0589115	0.265	0.213	2.82854e-05
Cct5	1.48922e-09	0.0507427	0.283	0.233	2.84605e-05
Sertad1	1.57038e-09	0.0425452	0.057	0.031	3.00114e-05
D030055H07Rik	1.58741e-09	0.069686	0.155	0.112	3.03369e-05
Ntsr2	1.67534e-09	-0.108935	0.979	0.985	3.20173e-05
Fam168b	1.707e-09	0.0488929	0.369	0.315	3.26226e-05
Csf1r	1.80864e-09	0.0344965	0.054	0.03	3.4565e-05
Larp1	1.85585e-09	0.0748271	0.353	0.294	3.54671e-05
Abt1	1.91367e-09	0.0476782	0.091	0.059	3.65721e-05
Ppp1r37	1.96595e-09	0.0463242	0.138	0.1	3.75713e-05
Ncan	1.96722e-09	0.0762944	0.493	0.43	3.75955e-05
Ddx50	2.01078e-09	0.0362312	0.35	0.3	3.84281e-05
Ccdc190	2.03289e-09	0.0628822	0.293	0.239	3.88505e-05
Ctsd	2.10772e-09	0.101904	0.723	0.669	4.02806e-05
Ccl4	2.16939e-09	0.0442286	0.041	0.019	4.14592e-05
Gm29676	2.27388e-09	-0.031379	0.015	0.034	4.34561e-05
Sap30	2.30813e-09	0.0674174	0.186	0.139	4.41107e-05
Kifc3	2.47518e-09	0.058262	0.341	0.286	4.73031e-05
Ssb	2.56832e-09	0.0268822	0.526	0.472	4.90832e-05
Tasor2	2.57626e-09	0.0521219	0.195	0.151	4.92349e-05
Adamts20	2.68216e-09	0.068398	0.167	0.122	5.12587e-05
Leng1	2.8479e-09	0.0666906	0.156	0.113	5.44262e-05
Mir124-2hg	2.87665e-09	0.0903694	0.409	0.348	5.49757e-05
Pisd	2.8946e-09	0.0588809	0.262	0.211	5.53187e-05
Trip12	3.15461e-09	0.0411073	0.483	0.429	6.02877e-05
Nudt22	3.20296e-09	0.0492011	0.122	0.085	6.12118e-05
Mgst1	3.29624e-09	-0.104212	0.283	0.32	6.29945e-05
Trip11	3.38648e-09	0.0443287	0.399	0.346	6.4719e-05
Ttc17	3.49975e-09	0.0485682	0.284	0.235	6.68837e-05
Actr10	3.63251e-09	0.0335473	0.339	0.293	6.94209e-05
Serf1	3.74742e-09	0.0497982	0.143	0.104	7.1617e-05
Tor1aip2	3.93452e-09	0.0556993	0.28	0.23	7.51927e-05
Slitrk2	4.17864e-09	0.0759889	0.645	0.584	7.9858e-05
Tagln3	4.4144e-09	-0.0845222	0.632	0.634	8.43636e-05
Cpeb3	4.54449e-09	0.0803588	0.618	0.557	8.68498e-05
Car8	4.88822e-09	0.0814149	0.225	0.175	9.34187e-05
Paip2b	4.93252e-09	0.049159	0.118	0.081	9.42654e-05
Chordc1	5.00794e-09	0.0739628	0.299	0.244	9.57067e-05
Kcnj16	5.04692e-09	0.0574485	0.396	0.341	9.64518e-05
Spred3	5.07098e-09	0.0570534	0.131	0.091	9.69115e-05
Cdc42ep1	5.18717e-09	0.045763	0.088	0.056	9.9132e-05
Gstm1	5.20889e-09	-0.134495	0.924	0.933	9.9547e-05
Pak2	5.36068e-09	0.0180915	0.492	0.446	0.000102448
Ptma	5.38129e-09	0.0934047	0.856	0.817	0.000102842
Sh3pxd2b	5.38855e-09	0.0683533	0.35	0.294	0.000102981
H2-K1	5.59528e-09	0.0898762	0.322	0.266	0.000106931
Erp29	5.72367e-09	0.0724729	0.381	0.322	0.000109385
Srgap1	5.77691e-09	0.0616036	0.253	0.204	0.000110403
Stox2	6.18143e-09	0.104021	0.904	0.871	0.000118133
Grm3	6.47721e-09	0.122056	0.986	0.982	0.000123786
Fgf1	7.05777e-09	0.0684382	0.367	0.31	0.000134881
Rhog	7.21725e-09	0.0546501	0.097	0.064	0.000137929
Pou3f2	7.29451e-09	0.0955889	0.528	0.469	0.000139405
Slc25a11	7.47244e-09	0.0436837	0.277	0.23	0.000142806
Sf3b1	7.47733e-09	0.0128194	0.588	0.543	0.000142899
Ptgds	7.6221e-09	0.364014	0.316	0.264	0.000145666
Mak16	7.72788e-09	0.0435186	0.109	0.075	0.000147688
Jrkl	8.0763e-09	0.0516931	0.115	0.079	0.000154346
Pde8a	8.09668e-09	0.0646519	0.126	0.089	0.000154736
Nos1ap	8.21223e-09	0.0505643	0.237	0.191	0.000156944
Zfp36l2	8.21847e-09	0.0366943	0.48	0.427	0.000157063
Cask	8.2364e-09	0.0833319	0.393	0.334	0.000157406
Acat2	8.43123e-09	0.0492453	0.187	0.144	0.000161129
Gk	8.49922e-09	0.0657757	0.625	0.565	0.000162429
Idh2	8.85105e-09	0.0408951	0.5	0.446	0.000169152
Cs	8.86958e-09	0.0400619	0.554	0.499	0.000169507
Ubqln2	9.11231e-09	0.06646	0.306	0.253	0.000174145
Nrip1	9.23646e-09	0.0545831	0.281	0.232	0.000176518
Atp1b1	9.27949e-09	0.10807	0.712	0.661	0.00017734
Jun	9.31419e-09	0.0810481	0.272	0.219	0.000178003
Cdh20	9.40149e-09	0.198812	0.848	0.818	0.000179672
Nt5m	9.96641e-09	0.0516397	0.221	0.176	0.000190468
Rsl1d1	1.05302e-08	0.0717811	0.303	0.249	0.000201242
Bag3	1.08826e-08	0.0570478	0.143	0.103	0.000207977
Med19	1.14048e-08	0.0674764	0.21	0.162	0.000217956
Sel1l	1.1536e-08	0.0591557	0.323	0.27	0.000220465
Pmepa1	1.16927e-08	0.0463258	0.124	0.09	0.00022346
Ddx42	1.18231e-08	0.0586247	0.275	0.225	0.000225951
Npm1	1.18492e-08	0.0555555	0.581	0.522	0.000226451
Tmem234	1.21813e-08	0.0463318	0.352	0.301	0.000232797
Arid4b	1.23855e-08	0.0125878	0.403	0.363	0.000236699
Mob4	1.24813e-08	0.0801521	0.399	0.341	0.00023853
Ppif	1.25383e-08	0.0442819	0.098	0.065	0.00023962
Penk	1.27314e-08	-0.022814	0.005	0.017	0.00024331
Utp3	1.29989e-08	0.061614	0.16	0.118	0.000248421
Hexim1	1.31508e-08	0.0651537	0.174	0.13	0.000251325
Eif5a	1.32581e-08	0.0621889	0.38	0.325	0.000253375
Magi1	1.34321e-08	0.0631109	0.525	0.466	0.000256702
Mrps5	1.37284e-08	0.0324863	0.318	0.274	0.000262363
Fads1	1.38803e-08	0.0467329	0.398	0.347	0.000265266
Rita1	1.39193e-08	0.0550745	0.156	0.115	0.000266013
Olig1	1.40042e-08	0.0839283	0.202	0.155	0.000267635
Fgfr3	1.40342e-08	0.0811016	0.859	0.818	0.000268208
Ugp2	1.466e-08	0.0841799	0.913	0.891	0.000280168
Chd6	1.47416e-08	0.0554252	0.574	0.516	0.000281727
Wdr33	1.49312e-08	0.0145089	0.498	0.455	0.00028535
Jund	1.4972e-08	0.0544382	0.463	0.407	0.000286131
Igkc	1.49926e-08	-0.0159952	0.001	0.008	0.000286523
Csad	1.50573e-08	0.0578347	0.254	0.205	0.00028776
Pde7b	1.51525e-08	0.142315	0.737	0.69	0.00028958
Eif2b4	1.55228e-08	0.0666487	0.192	0.147	0.000296656
Ccdc12	1.58353e-08	0.0673984	0.266	0.215	0.000302628
Jak1	1.5991e-08	0.0074463	0.447	0.409	0.000305603
Eif5	1.60267e-08	0.0381358	0.582	0.53	0.000306286
Cdk2ap2	1.62506e-08	0.0625465	0.189	0.145	0.000310565
Bambi	1.67899e-08	0.0490199	0.102	0.069	0.000320872
Nufip2	1.72463e-08	0.0722962	0.427	0.369	0.000329594
Fbxo2	1.79649e-08	-0.0978833	0.534	0.557	0.000343328
Ntmt1	1.83586e-08	0.0491004	0.155	0.116	0.00035085
Eif4ebp2	1.8681e-08	0.0560251	0.156	0.116	0.000357013
Zhx3	1.87223e-08	0.0807284	0.728	0.673	0.000357803
Srgap2	1.90414e-08	0.0993196	0.466	0.407	0.000363901
Bag4	1.92156e-08	0.038662	0.108	0.076	0.000367229
Wdr82	1.92556e-08	0.0619542	0.268	0.218	0.000367993
Ptrh2	2.01293e-08	0.0563627	0.113	0.078	0.00038469
Cep78	2.02474e-08	0.0535817	0.176	0.133	0.000386949
Cbx1	2.03882e-08	0.049254	0.319	0.269	0.000389639
Prr5	2.04908e-08	0.0626148	0.259	0.209	0.0003916
Hspa1b	2.05737e-08	0.0284944	0.027	0.011	0.000393185
Eif3d	2.06634e-08	0.0372244	0.21	0.17	0.000394899
Arhgef10	2.06641e-08	0.0338861	0.13	0.098	0.000394911
Ddx18	2.19757e-08	0.0769464	0.258	0.207	0.000419978
Msmo1	2.19996e-08	0.109135	0.917	0.901	0.000420434
Gpd1l	2.20607e-08	0.0435927	0.101	0.069	0.000421602
Snrnp48	2.28999e-08	0.0668173	0.303	0.251	0.000437639
Rdh11	2.29967e-08	0.0622732	0.208	0.162	0.00043949
H3f3b	2.31552e-08	0.100774	0.761	0.712	0.000442519
Ltc4s	2.34306e-08	0.0358781	0.035	0.017	0.000447782
S100a13	2.38886e-08	-0.115437	0.722	0.733	0.000456535
Zfp692	2.39568e-08	0.0596079	0.154	0.114	0.000457839
Fabp7	2.47125e-08	0.127129	0.654	0.599	0.000472281
Txndc17	2.47633e-08	0.0315245	0.3	0.257	0.000473251
Fdxr	2.50113e-08	0.0503732	0.19	0.148	0.000477991
Meaf6	2.54127e-08	0.0462613	0.213	0.171	0.000485662
Phb2	2.55483e-08	0.0550478	0.223	0.178	0.000488253
Tmco1	2.60111e-08	-0.0671564	0.611	0.609	0.000497098
Hmgcs1	2.61728e-08	0.0809915	0.686	0.63	0.000500189
Psmd11	2.63072e-08	0.0488235	0.38	0.329	0.000502757
Zfp775	2.64155e-08	0.0427187	0.144	0.108	0.000504826
Hmgn3	2.70636e-08	0.0706652	0.764	0.712	0.000517213
Dnttip2	2.78781e-08	0.057383	0.138	0.1	0.000532778
Map4k3	2.7919e-08	0.0737519	0.339	0.284	0.00053356
Pdcl	2.83109e-08	0.0434506	0.132	0.097	0.000541049
Mrpl15	2.88853e-08	0.0705271	0.28	0.229	0.000552027
Cox11	2.89987e-08	0.047258	0.186	0.146	0.000554195
Cox19	2.92687e-08	0.0468761	0.209	0.167	0.000559355
Lmo4	2.95921e-08	0.0911945	0.695	0.641	0.000565535
Pnpla2	3.00536e-08	0.0651628	0.185	0.141	0.000574354
Ngdn	3.02474e-08	0.0574774	0.166	0.124	0.000578059
Snapc2	3.03084e-08	0.0552322	0.121	0.085	0.000579224
Sox1	3.05723e-08	0.0607743	0.268	0.219	0.000584268
Scp2	3.07861e-08	-0.0887284	0.57	0.581	0.000588354
Mt3	3.08748e-08	-0.171728	0.982	0.989	0.000590048
Nob1	3.14377e-08	0.0490663	0.126	0.09	0.000600807
Appbp2	3.14586e-08	0.0576174	0.264	0.216	0.000601205
Ppp3r1	3.21155e-08	-0.0316762	0.176	0.174	0.00061376
Irak1bp1	3.21449e-08	0.0577816	0.185	0.142	0.000614321
Ldlrad4	3.2449e-08	0.0611528	0.144	0.105	0.000620132
Apod	3.25762e-08	0.078859	0.132	0.095	0.000622564
Kpna4	3.26559e-08	0.0416041	0.396	0.346	0.000624087
Pank3	3.34173e-08	0.0424089	0.222	0.18	0.000638638
Apex1	3.36137e-08	0.0508371	0.148	0.11	0.000642391
Aldh4a1	3.40543e-08	0.0588392	0.18	0.137	0.000650812
Ccdc28b	3.40972e-08	0.0627698	0.277	0.227	0.000651631
Sipa1l3	3.4676e-08	0.0555262	0.181	0.139	0.000662693
Smim13	3.47817e-08	0.0544621	0.135	0.097	0.000664714
Rpl36al	3.51011e-08	0.0173765	0.419	0.375	0.000670818
Acat3	3.51609e-08	0.0661613	0.261	0.211	0.00067196
Eif4a1	3.55681e-08	0.0428455	0.429	0.378	0.000679743
Sdc4	3.56355e-08	0.0693978	0.827	0.781	0.00068103
Gpatch2	3.56369e-08	0.074191	0.276	0.225	0.000681057
Ino80b	3.61382e-08	0.058243	0.184	0.141	0.000690637
Cap2	3.61532e-08	0.0684038	0.366	0.311	0.000690925
Bicral	3.61583e-08	0.0655614	0.353	0.298	0.000691021
Cfl1	3.66355e-08	-0.0952293	0.799	0.795	0.00070014
Tril	3.72987e-08	0.0795761	0.843	0.801	0.000712815
Midn	3.78807e-08	0.0556108	0.161	0.121	0.000723939
Ostc	3.7917e-08	0.084549	0.351	0.296	0.000724632
Ppp1r10	3.81118e-08	0.0394379	0.277	0.234	0.000728355
Hdac4	3.81545e-08	0.103339	0.601	0.546	0.000729171
Usp2	3.84905e-08	0.050002	0.419	0.366	0.000735592
Zfp639	3.9667e-08	0.0514075	0.236	0.191	0.000758076
Vgll4	4.0305e-08	0.0752745	0.323	0.269	0.00077027
Snrpa	4.15557e-08	0.0701421	0.229	0.181	0.00079417
Aif1	4.15618e-08	0.0462319	0.043	0.023	0.000794288
Nkapd1	4.32982e-08	0.0544462	0.152	0.113	0.000827471
Galnt18	4.34508e-08	0.103307	0.325	0.272	0.000830389
Arhgap18	4.3475e-08	0.0801426	0.233	0.185	0.000830851
Cmtm5	4.37061e-08	-0.0854698	0.751	0.756	0.000835267
Tubb5	4.45646e-08	0.0565275	0.264	0.216	0.000851675
Lhx2	4.46135e-08	0.0361175	0.746	0.695	0.000852608
Bicd1	4.46227e-08	0.031999	0.415	0.369	0.000852785
Ccnd3	4.64065e-08	0.0762678	0.377	0.322	0.000886875
Atp6v1e1	4.66257e-08	0.0066367	0.637	0.593	0.000891064
Stoml1	4.71973e-08	0.0538983	0.121	0.086	0.000901987
Ostf1	4.75078e-08	0.0539188	0.129	0.092	0.000907922
Ccnt2	4.76023e-08	0.0768105	0.373	0.317	0.000909727
Appl2	4.7717e-08	-0.10004	0.934	0.944	0.000911919
Borcs5	4.82499e-08	0.0501838	0.123	0.088	0.000922104
Slc25a18	4.82856e-08	0.0667038	0.712	0.658	0.000922786
Dlgap4	4.85427e-08	0.047586	0.219	0.176	0.0009277
Banp	4.94961e-08	0.0601645	0.16	0.119	0.000945921
Ostm1	5.01183e-08	0.0556611	0.288	0.24	0.000957811
Tlk1	5.03242e-08	0.0514031	0.282	0.235	0.000961746
Glrx3	5.06844e-08	0.0229167	0.319	0.28	0.00096863
Omg	5.24163e-08	-0.000860422	0.471	0.435	0.00100173
Crym	5.25855e-08	-0.221187	0.055	0.085	0.00100496
Naa20	5.30312e-08	0.0425162	0.298	0.252	0.00101348
Yrdc	5.33912e-08	0.0457643	0.087	0.057	0.00102036
Ccdc85b	5.3398e-08	0.058275	0.322	0.273	0.00102049
Klhl26	5.34879e-08	0.0508775	0.115	0.081	0.00102221
Blvrb	5.35705e-08	0.0420582	0.208	0.168	0.00102379
Acot13	5.3614e-08	0.0046623	0.368	0.333	0.00102462
Pgam5	5.37833e-08	0.0491355	0.128	0.092	0.00102785
Zbtb16	5.39583e-08	0.0928858	0.358	0.303	0.0010312
Celf2	5.40557e-08	0.0957115	0.975	0.963	0.00103306
Vps72	5.43755e-08	0.0504613	0.158	0.119	0.00103917
Gmcl1	5.46332e-08	0.0342004	0.173	0.139	0.0010441
Rps19bp1	5.67678e-08	0.0518434	0.22	0.177	0.00108489
Ndufa11	5.78001e-08	-0.0596378	0.641	0.626	0.00110462
Dpy30	5.83635e-08	0.0511294	0.248	0.202	0.00111538
Cnot8	5.85548e-08	0.0535096	0.114	0.081	0.00111904
Bcar1	5.87232e-08	0.0550348	0.139	0.101	0.00112226
Zfr	5.88293e-08	0.0641897	0.653	0.597	0.00112429
Mrm2	6.16805e-08	0.0384741	0.058	0.034	0.00117878
Cct6a	6.18487e-08	0.0655933	0.38	0.325	0.00118199
Xab2	6.30492e-08	0.0375983	0.084	0.055	0.00120493
Rbm42	6.36097e-08	0.0634037	0.218	0.172	0.00121565
Ak4	6.39529e-08	0.0353936	0.228	0.189	0.0012222
Fam222b	6.47076e-08	0.0573247	0.319	0.269	0.00123663
Cdh19	6.57538e-08	0.107466	0.779	0.737	0.00125662
Arnt2	6.60684e-08	0.0628335	0.627	0.571	0.00126263
Dnpep	6.63474e-08	0.0592187	0.139	0.101	0.00126796
Sparcl1	6.74237e-08	-0.0965399	0.999	0.998	0.00128853
Stard4	6.76122e-08	0.0507825	0.107	0.074	0.00129214
Idi1	6.91769e-08	0.0910817	0.55	0.493	0.00132204
Mrpl41	7.04612e-08	-0.00760814	0.366	0.336	0.00134658
Mapk10	7.14192e-08	0.10806	0.753	0.707	0.00136489
Hnrnpl	7.29036e-08	0.0598594	0.358	0.305	0.00139326
Smarca2	7.32291e-08	0.0712653	0.513	0.456	0.00139948
Zfp292	7.43856e-08	0.0315346	0.343	0.301	0.00142158
Inpp5f	7.57734e-08	0.0625694	0.217	0.171	0.00144811
Eef1akmt1	7.76765e-08	0.0469011	0.196	0.155	0.00148448
Snx16	7.83255e-08	0.0311242	0.133	0.103	0.00149688
Rexo2	7.84193e-08	0.0390984	0.285	0.242	0.00149867
Rae1	7.88988e-08	0.0564414	0.159	0.119	0.00150783
Magoh	7.95462e-08	0.0635564	0.249	0.201	0.00152021
Ptgs1	7.9684e-08	0.0495995	0.092	0.061	0.00152284
P3h4	7.98592e-08	0.0490365	0.114	0.08	0.00152619
Mrps28	8.22346e-08	0.0689687	0.259	0.21	0.00157159
Tbcc	8.29039e-08	0.0506548	0.108	0.075	0.00158438
Daam1	8.40744e-08	-0.00120714	0.602	0.563	0.00160675
Trerf1	8.70726e-08	0.0547612	0.266	0.219	0.00166404
Zfp36	8.81527e-08	0.0389826	0.058	0.034	0.00168469
C9orf72	8.84233e-08	0.0443368	0.134	0.1	0.00168986
Ube2m	9.04462e-08	0.0270803	0.282	0.243	0.00172852
Ddah2	9.05784e-08	0.0679931	0.217	0.171	0.00173104
Cab39	9.0813e-08	0.0365781	0.257	0.216	0.00173553
Tnrc6b	9.20112e-08	0.0342637	0.835	0.791	0.00175843
Abhd16a	9.29675e-08	0.0428493	0.203	0.163	0.0017767
Kbtbd2	9.33572e-08	0.0417204	0.12	0.087	0.00178415
Nktr	9.49276e-08	0.0724866	0.502	0.445	0.00181416
Tbca	9.76266e-08	0.0322237	0.38	0.336	0.00186574
Rbm28	9.8312e-08	0.0314394	0.303	0.262	0.00187884
Psat1	1.02673e-07	0.0198242	0.464	0.421	0.00196219
Sil1	1.02701e-07	0.0307072	0.287	0.247	0.00196273
Agmo	1.05501e-07	0.0931753	0.384	0.329	0.00201624
Tor2a	1.06376e-07	0.0550839	0.189	0.147	0.00203294
Birc6	1.06506e-07	0.0487031	0.637	0.584	0.00203543
Tob2	1.06776e-07	0.056896	0.289	0.241	0.00204059
Wasl	1.07432e-07	0.0607002	0.426	0.372	0.00205313
Gnb1	1.07675e-07	-0.0541117	0.653	0.649	0.00205777
Atf3	1.08545e-07	0.0232015	0.016	0.005	0.00207441
Phactr1	1.09979e-07	0.0890871	0.384	0.329	0.00210181
Phc2	1.10517e-07	0.06349	0.248	0.201	0.00211209
Akap8	1.11249e-07	0.0344423	0.242	0.204	0.00212607
Eogt	1.11712e-07	0.0462895	0.248	0.205	0.00213493
N6amt1	1.13542e-07	0.0405692	0.127	0.094	0.00216991
Slc2a13	1.13866e-07	0.0601073	0.125	0.09	0.0021761
Atxn2	1.14343e-07	0.0196785	0.48	0.437	0.00218521
Tst	1.14827e-07	0.0838174	0.743	0.694	0.00219446
Ubc	1.14969e-07	0.12579	0.85	0.835	0.00219717
Arfgef1	1.17377e-07	0.0393087	0.344	0.298	0.0022432
Trmt10c	1.1776e-07	0.0525102	0.106	0.074	0.00225051
Hopx	1.18079e-07	-0.153199	0.691	0.713	0.00225662
Azin1	1.19472e-07	0.001159	0.473	0.438	0.00228322
Mcrip2	1.20099e-07	0.0709651	0.217	0.172	0.0022952
Eif3j1	1.2023e-07	0.0483875	0.428	0.379	0.00229771
Fam104a	1.24142e-07	0.0701724	0.281	0.231	0.00237248
Lztfl1	1.25755e-07	0.0522189	0.222	0.179	0.0024033
2700081O15Rik	1.26182e-07	0.0393351	0.157	0.123	0.00241146
Gabrb1	1.26809e-07	0.106637	0.993	0.993	0.00242345
Bcorl1	1.2775e-07	0.0363754	0.106	0.076	0.00244143
Traf6	1.28646e-07	0.0520937	0.145	0.108	0.00245855
Cyb5b	1.29747e-07	0.0673714	0.308	0.257	0.0024796
Cox6a1	1.30263e-07	-0.0676981	0.625	0.62	0.00248946
Ccdc59	1.30384e-07	0.0494738	0.287	0.241	0.00249177
Tor1a	1.31286e-07	0.0562347	0.211	0.168	0.00250901
Arhgef40	1.32201e-07	0.0521386	0.226	0.183	0.0025265
C130071C03Rik	1.32899e-07	0.0450104	0.844	0.801	0.00253983
Ankrd12	1.33522e-07	0.0113721	0.587	0.544	0.00255175
5031425E22Rik	1.33779e-07	0.00895242	0.498	0.459	0.00255666
Thumpd2	1.33934e-07	0.0525965	0.14	0.102	0.00255961
Armt1	1.33987e-07	0.0182439	0.07	0.051	0.00256062
Jmjd1c	1.35236e-07	0.0396785	0.682	0.63	0.00258449
Slc24a3	1.36073e-07	0.0821582	0.227	0.181	0.00260049
Rab3a	1.36754e-07	0.0403682	0.186	0.148	0.0026135
Gramd3	1.38554e-07	0.00806144	0.731	0.689	0.0026479
Rnps1	1.38707e-07	0.0602263	0.252	0.205	0.00265083
Kank1	1.39196e-07	0.0750325	0.603	0.547	0.00266017
Eif3e	1.39204e-07	0.0346698	0.33	0.286	0.00266032
Etv1	1.39701e-07	0.070509	0.277	0.228	0.00266982
Brd2	1.39957e-07	0.054165	0.24	0.195	0.00267471
Vps37a	1.40183e-07	0.0480753	0.269	0.224	0.00267905
Gas1	1.41007e-07	0.0892706	0.329	0.281	0.00269478
Ankrd49	1.41466e-07	0.0413843	0.133	0.099	0.00270355
Entpd2	1.43551e-07	0.0664861	0.389	0.335	0.0027434
Srebf1	1.44732e-07	-0.0776127	0.481	0.496	0.00276597
Map4k4	1.45072e-07	0.00786181	0.556	0.516	0.00277247
Pantr1	1.45121e-07	-0.141651	0.887	0.899	0.00277342
Cdk9	1.46361e-07	0.0453587	0.14	0.105	0.00279711
Gm26512	1.46742e-07	-0.062927	0.652	0.643	0.00280439
Nfic	1.48546e-07	0.0365354	0.269	0.229	0.00283886
Ntpcr	1.49603e-07	0.0399157	0.096	0.066	0.00285906
Rgma	1.52371e-07	0.069438	0.692	0.639	0.00291195
Sall3	1.5296e-07	0.0787235	0.314	0.263	0.00292322
Eps8	1.53957e-07	0.0817111	0.806	0.762	0.00294227
Hnrnpa0	1.54255e-07	0.058235	0.356	0.306	0.00294797
Nadk2	1.54813e-07	-0.0511966	0.53	0.524	0.00295864
Rbm8a	1.5569e-07	0.0500863	0.278	0.233	0.00297539
Eef2k	1.56661e-07	0.0605678	0.2	0.157	0.00299395
Uqcrb	1.56762e-07	-0.0819221	0.726	0.727	0.00299588
Ubn2	1.57139e-07	0.0110054	0.592	0.551	0.00300308
Ubl5	1.5897e-07	-0.0814033	0.516	0.522	0.00303807
S100a9	1.61219e-07	0.0172458	0.009	0.001	0.00308105
Zdhhc13	1.61553e-07	0.0468726	0.131	0.096	0.00308744
Lsm8	1.61851e-07	0.0318612	0.179	0.146	0.00309313
Plekho2	1.63483e-07	0.0531185	0.19	0.149	0.00312433
Serbp1	1.65932e-07	0.0561293	0.615	0.56	0.00317112
Lonp2	1.66226e-07	0.0788883	0.466	0.41	0.00317675
Pnkd	1.66657e-07	0.0456654	0.606	0.554	0.00318498
Hs2st1	1.6678e-07	0.0361704	0.397	0.352	0.00318734
Gm49164	1.66978e-07	0.0634565	0.119	0.085	0.00319112
Akirin2	1.67578e-07	0.0673145	0.296	0.246	0.00320259
Glt8d1	1.67843e-07	0.0396275	0.361	0.316	0.00320765
Olfml3	1.68315e-07	0.031779	0.031	0.014	0.00321667
Dazap1	1.68694e-07	0.0466146	0.189	0.15	0.00322392
Dstn	1.68858e-07	-0.0216375	0.482	0.456	0.00322705
Fkbp4	1.69316e-07	0.0603338	0.275	0.227	0.00323579
Papss1	1.70014e-07	0.0464305	0.297	0.252	0.00324915
Tgfbr1	1.70044e-07	0.0635339	0.154	0.115	0.00324971
Cbll1	1.7035e-07	0.0597447	0.178	0.137	0.00325556
Fbxl15	1.71953e-07	0.0367311	0.102	0.072	0.0032862
Slc9a3r1	1.73281e-07	0.06105	0.709	0.657	0.00331157
Irf2bp1	1.73467e-07	0.050709	0.155	0.118	0.00331513
Zzef1	1.73715e-07	0.0354259	0.274	0.234	0.00331986
Cox14	1.74862e-07	0.050563	0.416	0.366	0.00334179
Stk38	1.75023e-07	0.0504289	0.292	0.246	0.00334486
Atp1a2	1.78136e-07	0.0558784	0.999	1	0.00340435
Smap1	1.78163e-07	0.0635606	0.466	0.412	0.00340487
Hlf	1.7986e-07	-0.0453436	0.544	0.531	0.00343731
Ppil2	1.80917e-07	0.0511275	0.22	0.177	0.0034575
Mboat2	1.81419e-07	0.0347612	0.479	0.431	0.00346711
Trmt13	1.81823e-07	0.0528886	0.165	0.125	0.00347483
Chrdl1	1.84916e-07	0.0920709	0.348	0.296	0.00353392
Idh1	1.88305e-07	0.0260694	0.567	0.519	0.00359871
Tbc1d10a	1.89937e-07	0.0519793	0.281	0.235	0.00362989
Ssr3	1.90448e-07	-0.0170684	0.437	0.413	0.00363965
Sde2	1.93859e-07	0.0529849	0.133	0.097	0.00370485
Lamtor3	1.94505e-07	0.0304539	0.277	0.238	0.00371719
Klhdc2	1.95539e-07	0.0432169	0.232	0.19	0.00373694
Irs2	2.02644e-07	0.065717	0.195	0.152	0.00387272
Fam98a	2.03706e-07	0.0278493	0.158	0.128	0.00389302
Rlf	2.09089e-07	0.0400442	0.266	0.224	0.0039959
Apba2	2.10065e-07	0.0378939	0.613	0.564	0.00401456
Zfyve9	2.10243e-07	0.0464425	0.332	0.285	0.00401795
Tnfaip8	2.11568e-07	0.0498784	0.315	0.269	0.00404327
Map3k3	2.11802e-07	0.0580532	0.178	0.137	0.00404774
Fam49b	2.13082e-07	0.0127148	0.549	0.506	0.00407221
Prxl2b	2.13917e-07	0.0236849	0.112	0.086	0.00408817
Dlc1	2.1469e-07	0.05808	0.319	0.27	0.00410294
Chac2	2.16983e-07	0.059506	0.178	0.138	0.00414676
Adsl	2.18318e-07	0.0404124	0.132	0.099	0.00417227
Neo1	2.18347e-07	0.0370767	0.634	0.585	0.00417282
Snx18	2.18672e-07	0.0616043	0.174	0.133	0.00417903
Zfp771	2.22991e-07	0.0717662	0.254	0.208	0.00426159
Dhx15	2.23167e-07	0.0595015	0.302	0.254	0.00426495
Rgs2	2.23705e-07	0.050074	0.081	0.053	0.00427522
Vps35	2.24945e-07	-0.000242127	0.365	0.334	0.00429891
Ppp2ca	2.27274e-07	0.0340509	0.483	0.435	0.00434344
Vars	2.2832e-07	0.0497608	0.106	0.075	0.00436342
Mrps22	2.3508e-07	0.0332055	0.16	0.127	0.00449261
Myl6	2.36371e-07	-0.0473965	0.587	0.573	0.00451728
Erp44	2.39859e-07	0.0666148	0.319	0.268	0.00458395
Bet1l	2.45138e-07	0.0377937	0.195	0.158	0.00468483
Wdcp	2.46415e-07	0.0387963	0.123	0.091	0.00470923
Psmc5	2.46504e-07	0.0133964	0.314	0.28	0.00471095
Zdhhc17	2.50881e-07	0.0680745	0.324	0.273	0.00479459
Serpinh1	2.52783e-07	0.0683324	0.285	0.236	0.00483094
Rrp8	2.56479e-07	0.0524195	0.271	0.226	0.00490156
Mapk1ip1	2.5744e-07	0.0559078	0.232	0.187	0.00491994
Mtch2	2.58593e-07	0.0385378	0.436	0.388	0.00494196
0610009B22Rik	2.59895e-07	0.0585342	0.266	0.219	0.00496685
Mrpl52	2.6101e-07	0.00389741	0.376	0.343	0.00498816
Esrrg	2.64938e-07	0.068157	0.21	0.167	0.00506323
Ywhag	2.65533e-07	0.0621308	0.229	0.185	0.0050746
Fibp	2.66104e-07	0.00196173	0.407	0.372	0.00508552
Sap130	2.66679e-07	0.0262795	0.242	0.208	0.0050965
Bcr	2.71552e-07	0.0564885	0.226	0.182	0.00518962
Cbx8	2.74724e-07	0.0264091	0.037	0.019	0.00525025
Galnt1	2.75566e-07	-0.0247387	0.563	0.539	0.00526634
Pigx	2.75793e-07	0.071276	0.247	0.202	0.00527069
Tmem100	2.78756e-07	0.0860776	0.458	0.403	0.00532731
Nsdhl	2.80079e-07	0.0502491	0.306	0.26	0.00535259
Frs2	2.81167e-07	0.0507953	0.266	0.221	0.00537338
Pttg1	2.8328e-07	0.0266336	0.362	0.321	0.00541377
Glyr1	2.85041e-07	0.0357851	0.275	0.235	0.00544742
Psmb3	2.86172e-07	0.0245609	0.38	0.339	0.00546904
Rrnad1	2.86375e-07	0.0536081	0.168	0.128	0.00547291
Fzd1	2.8822e-07	0.0438191	0.137	0.102	0.00550817
Luzp1	2.93469e-07	0.0547153	0.305	0.258	0.00560848
Cbx3	2.9394e-07	-0.0146525	0.555	0.524	0.00561748
Lgalsl	2.96608e-07	0.0649032	0.372	0.32	0.00566847
Aimp2	2.99528e-07	0.0461312	0.122	0.089	0.00572428
Tkt	3.03045e-07	0.0587423	0.702	0.651	0.00579149
Rbm4	3.03965e-07	0.0464018	0.197	0.157	0.00580908
Gtf2b	3.05149e-07	0.0604904	0.202	0.159	0.0058317
Sec22a	3.05965e-07	0.000815279	0.172	0.155	0.0058473
Wdr26	3.10324e-07	0.0388713	0.333	0.29	0.00593061
Sos1	3.12621e-07	0.0580038	0.281	0.235	0.00597449
Cables1	3.20436e-07	0.0305413	0.663	0.613	0.00612386
Cycs	3.22943e-07	0.0575797	0.572	0.518	0.00617177
Calr	3.25962e-07	0.0613307	0.694	0.642	0.00622947
Prrc2a	3.26249e-07	0.0538257	0.23	0.186	0.00623495
1810026B05Rik	3.26634e-07	0.0383393	0.351	0.307	0.00624231
A830008E24Rik	3.28477e-07	0.0574873	0.185	0.144	0.00627753
Nfkbib	3.30243e-07	0.0442775	0.105	0.075	0.00631127
Plcd4	3.30489e-07	0.022385	0.575	0.531	0.00631597
Dzip1l	3.33368e-07	0.0617901	0.336	0.286	0.006371
Zfp703	3.37117e-07	0.0669321	0.218	0.174	0.00644264
Pou2f1	3.37953e-07	0.0569179	0.636	0.583	0.00645862
Tm2d3	3.41047e-07	0.0538254	0.322	0.274	0.00651774
Cebpb	3.41245e-07	0.0591096	0.131	0.096	0.00652152
Cyth4	3.43281e-07	0.022058	0.017	0.006	0.00656044
Ywhae	3.44022e-07	-0.0898572	0.849	0.849	0.00657461
Cdv3	3.45261e-07	0.0661367	0.275	0.227	0.00659829
Dstyk	3.46196e-07	0.047768	0.244	0.202	0.00661615
Rhoq	3.49385e-07	0.0459559	0.322	0.277	0.00667709
Rassf8	3.49878e-07	0.0418702	0.191	0.154	0.00668652
Pcmtd1	3.52489e-07	0.0521937	0.623	0.571	0.00673641
Stambpl1	3.55635e-07	0.0592628	0.296	0.248	0.00679654
Gabarapl2	3.56698e-07	-0.059358	0.436	0.432	0.00681686
Zfp637	3.59303e-07	0.041044	0.169	0.133	0.00686665
Zfp641	3.60576e-07	0.0204464	0.263	0.232	0.00689097
Acss1	3.65004e-07	-0.0109078	0.647	0.613	0.00697559
Ccdc58	3.66179e-07	0.0556811	0.289	0.243	0.00699805
Rbm18	3.69898e-07	0.0499105	0.17	0.132	0.00706912
Ripk2	3.71123e-07	0.0445869	0.102	0.071	0.00709254
Uqcr11	3.73375e-07	-0.107168	0.772	0.794	0.00713557
Pgp	3.74048e-07	0.0787475	0.606	0.552	0.00714842
Brd7	3.75055e-07	0.0192715	0.261	0.227	0.00716768
Cd81	3.75536e-07	-0.106269	0.968	0.973	0.00717687
Prmt1	3.78247e-07	0.0409512	0.198	0.16	0.00722867
Txnip	3.79373e-07	-0.0895408	0.18	0.2	0.0072502
Dancr	3.83986e-07	0.0415571	0.179	0.143	0.00733836
Ghr	3.89687e-07	0.0433189	0.695	0.645	0.00744731
Arhgap17	3.95488e-07	0.0329859	0.226	0.19	0.00755817
Etv5	3.9748e-07	0.0658251	0.336	0.286	0.00759623
Mknk1	4.01488e-07	0.0349735	0.115	0.086	0.00767284
Etv6	4.03772e-07	0.0397176	0.352	0.308	0.00771649
Prkrip1	4.0442e-07	0.0450017	0.13	0.097	0.00772887
Ppp2r2b	4.04615e-07	0.0975688	0.927	0.902	0.0077326
Zbtb4	4.04696e-07	0.0494615	0.164	0.127	0.00773415
Serinc3	4.12874e-07	0.068937	0.35	0.299	0.00789043
Rps2	4.16992e-07	0.0987468	0.695	0.647	0.00796913
Mrps9	4.2129e-07	0.0290628	0.268	0.231	0.00805127
Exosc7	4.28381e-07	0.0578124	0.174	0.135	0.00818678
Aph1a	4.29584e-07	0.0577133	0.23	0.186	0.00820978
Nrp1	4.3029e-07	0.0512537	0.229	0.187	0.00822327
Atg12	4.3728e-07	0.0591822	0.199	0.158	0.00835686
Prdm2	4.4011e-07	0.0383908	0.233	0.195	0.00841094
Pnkp	4.41529e-07	0.0511698	0.14	0.104	0.00843806
Itga6	4.45558e-07	0.0508223	0.372	0.324	0.00851505
G0s2	4.46535e-07	0.0482469	0.229	0.188	0.00853372
Klhl22	4.48182e-07	0.0325615	0.155	0.124	0.00856521
Klf15	4.48262e-07	0.0563425	0.322	0.274	0.00856674
Rnf24	4.49999e-07	0.0705269	0.348	0.297	0.00859994
Msantd3	4.5608e-07	0.0471883	0.141	0.106	0.00871614
Srsf2	4.57792e-07	0.0730983	0.542	0.488	0.00874886
Prodh	4.6351e-07	-0.0571106	0.574	0.575	0.00885815
Lysmd2	4.70547e-07	0.0551946	0.297	0.25	0.00899262
Fstl1	4.7108e-07	0.0394304	0.3	0.258	0.0090028
Tmem70	4.75341e-07	0.0575588	0.242	0.198	0.00908424
Nim1k	4.7553e-07	0.081394	0.727	0.681	0.00908785
Gemin7	4.78563e-07	0.0532992	0.179	0.14	0.00914582
Txndc11	4.81437e-07	0.0741276	0.213	0.17	0.00920075
Rbis	4.84076e-07	0.0554912	0.332	0.284	0.00925117
Mfsd5	4.8479e-07	0.0455201	0.136	0.102	0.00926482
Numa1	4.85404e-07	0.068925	0.296	0.248	0.00927656
Tmem44	4.85738e-07	0.0487496	0.303	0.258	0.00928294
Sdc3	4.90203e-07	0.0453119	0.121	0.089	0.00936828
Mrps31	4.91832e-07	0.049815	0.211	0.17	0.0093994
Npc2	4.95569e-07	0.0305693	0.534	0.487	0.00947082
Hgsnat	4.96702e-07	0.0400136	0.165	0.13	0.00949248
Cfap20	5.00951e-07	0.0596321	0.269	0.222	0.00957368
Map2k6	5.01497e-07	0.0592186	0.624	0.571	0.00958411
Chd4	5.04222e-07	-0.00127911	0.588	0.554	0.00963619
Acsl4	5.08587e-07	0.0592389	0.218	0.176	0.0097196
Eef1g	5.09101e-07	0.0352737	0.391	0.347	0.00972943
Opa3	5.09954e-07	0.0495977	0.131	0.096	0.00974573
Bloc1s4	5.11726e-07	0.044365	0.088	0.06	0.0097796
Arhgef10l	5.12636e-07	0.0330384	0.287	0.249	0.00979698
Zmynd8	5.14505e-07	0.0605086	0.302	0.255	0.00983271
Lims1	5.14516e-07	0.0531039	0.491	0.438	0.00983291
Mfhas1	5.16991e-07	0.063545	0.355	0.305	0.00988022
Mllt10	5.19206e-07	0.05272	0.644	0.592	0.00992254
Sec31a	5.1981e-07	0.0453275	0.237	0.197	0.00993408
Csnk1a1	5.2058e-07	0.0422522	0.762	0.716	0.0099488
Wdr75	5.2555e-07	0.0521918	0.15	0.113	0.0100438
Pop7	5.3226e-07	0.0560854	0.165	0.127	0.010172
Ddx6	5.3227e-07	0.0318466	0.364	0.322	0.0101722
Klhl15	5.32304e-07	0.0299827	0.086	0.061	0.0101729
Aldh7a1	5.37655e-07	-0.0649159	0.527	0.53	0.0102751
B3galt2	5.45532e-07	0.0736975	0.244	0.199	0.0104257
5430405H02Rik	5.47732e-07	0.0333536	0.22	0.183	0.0104677
Nit2	5.54014e-07	0.00108879	0.118	0.103	0.0105878
Kcnj10	5.54974e-07	0.0585754	0.41	0.36	0.0106061
Phyhipl	5.57808e-07	0.0873715	0.813	0.776	0.0106603
Srpr	5.6738e-07	0.0343806	0.29	0.25	0.0108432
Sfpq	5.71642e-07	0.0784628	0.436	0.383	0.0109247
Hsp90b1	5.76064e-07	0.0631058	0.787	0.742	0.0110092
Srsf7	5.7802e-07	0.0717368	0.404	0.352	0.0110465
Rchy1	5.79683e-07	0.0597302	0.26	0.214	0.0110783
Fgd4	5.83676e-07	0.0576002	0.611	0.559	0.0111546
Rnf180	5.84469e-07	0.0221996	0.327	0.29	0.0111698
Sema4b	5.84851e-07	0.063744	0.352	0.302	0.0111771
Psma1	5.85686e-07	0.0353771	0.345	0.301	0.0111931
Wipf2	5.86069e-07	0.0477778	0.159	0.122	0.0112004
Rabepk	5.90099e-07	0.0465133	0.123	0.09	0.0112774
Atp1a3	5.90158e-07	-0.0468676	0.038	0.061	0.0112785
Dclk1	5.9239e-07	0.115032	0.99	0.99	0.0113212
Tada1	5.94364e-07	0.0365676	0.102	0.074	0.0113589
Mdn1	5.98586e-07	0.0552084	0.158	0.12	0.0114396
Gsk3b	6.03042e-07	0.0506656	0.768	0.721	0.0115247
Cyb5r4	6.1364e-07	0.0408671	0.159	0.125	0.0117273
Igdcc4	6.14574e-07	0.0360684	0.333	0.29	0.0117451
Slc25a25	6.16861e-07	0.0312923	0.083	0.058	0.0117888
Sorbs3	6.18951e-07	0.0290723	0.198	0.166	0.0118288
Slc35f6	6.19227e-07	0.0515574	0.177	0.138	0.0118341
Atad1	6.20827e-07	0.0429269	0.339	0.295	0.0118646
Snx21	6.22737e-07	0.0563394	0.184	0.144	0.0119011
Pik3r1	6.25274e-07	0.0708651	0.767	0.721	0.0119496
Serp1	6.29684e-07	0.0306387	0.166	0.135	0.0120339
Ppp2r2a	6.37253e-07	0.0419527	0.315	0.271	0.0121785
Pdia4	6.37734e-07	0.0619049	0.272	0.226	0.0121877
Arhgap39	6.39372e-07	0.0523624	0.182	0.143	0.012219
Tmem119	6.43477e-07	0.0320163	0.032	0.016	0.0122975
Zkscan3	6.43912e-07	0.058276	0.346	0.297	0.0123058
Dda1	6.50437e-07	0.0645391	0.187	0.148	0.0124305
Ice1	6.57171e-07	0.0476741	0.199	0.159	0.0125592
Pmm2	6.59097e-07	0.0505142	0.151	0.115	0.012596
Arhgap42	6.59833e-07	0.0572389	0.366	0.318	0.0126101
Ago2	6.63161e-07	0.0503922	0.292	0.247	0.0126737
Pigu	6.6353e-07	0.0574443	0.166	0.129	0.0126807
Trir	6.64533e-07	0.0430919	0.315	0.272	0.0126999
Plekhf2	6.66266e-07	0.0635749	0.223	0.18	0.012733
Zfp60	6.82251e-07	0.0500528	0.13	0.096	0.0130385
Lrpprc	6.90874e-07	0.0258953	0.186	0.156	0.0132033
Hnrnpk	6.9255e-07	0.0147677	0.721	0.677	0.0132353
Palld	6.94814e-07	0.0968903	0.367	0.317	0.0132786
Pabpn1	6.9834e-07	0.0385635	0.69	0.642	0.013346
Ino80d	6.98807e-07	0.0437456	0.292	0.249	0.0133549
Sub1	7.1555e-07	-0.000584217	0.685	0.648	0.0136749
Olfm1	7.23054e-07	-0.0719971	0.137	0.173	0.0138183
Slain2	7.23424e-07	0.0379257	0.17	0.136	0.0138254
Ptges3	7.27616e-07	0.0181432	0.506	0.465	0.0139055
Fgd6	7.28901e-07	-0.0322242	0.656	0.634	0.01393
Tead1	7.29716e-07	0.0609093	0.554	0.501	0.0139456
Rwdd4a	7.32282e-07	0.0528941	0.157	0.12	0.0139946
Sf3b6	7.34549e-07	0.0343469	0.573	0.525	0.014038
Supt3	7.40981e-07	0.039922	0.325	0.283	0.0141609
Gipc1	7.43891e-07	0.0660708	0.194	0.154	0.0142165
Cox4i1	7.44714e-07	-0.103313	0.901	0.909	0.0142322
Diaph1	7.51179e-07	0.0602275	0.215	0.173	0.0143558
Them4	7.54244e-07	0.0613182	0.236	0.193	0.0144144
Mtap	7.6338e-07	0.0470124	0.104	0.074	0.014589
Mosmo	7.63619e-07	0.0492651	0.217	0.177	0.0145935
Prdx1	7.64047e-07	-0.130339	0.903	0.917	0.0146017
Ubr5	7.66999e-07	-0.015123	0.628	0.598	0.0146581
Lzts2	7.70933e-07	0.038824	0.124	0.093	0.0147333
Cyp2d22	7.7146e-07	0.049412	0.483	0.432	0.0147434
Sqstm1	7.72494e-07	0.0534711	0.474	0.423	0.0147631
Svbp	7.72971e-07	0.0245422	0.295	0.258	0.0147723
Spag7	7.84077e-07	0.0662796	0.289	0.242	0.0149845
Lipe	7.85574e-07	0.0506821	0.129	0.095	0.0150131
Hadhb	7.91943e-07	-0.0311368	0.59	0.569	0.0151348
Chchd4	7.95704e-07	0.041594	0.126	0.094	0.0152067
Gorasp2	7.97935e-07	0.0395758	0.208	0.171	0.0152493
Siva1	8.04938e-07	0.0469664	0.094	0.065	0.0153832
Nr1h2	8.10126e-07	0.0432349	0.146	0.112	0.0154823
Asxl2	8.20153e-07	0.00175435	0.331	0.303	0.0156739
Sod2	8.21361e-07	0.0311467	0.554	0.507	0.015697
Eci1	8.36233e-07	-0.0148303	0.564	0.534	0.0159812
Polr2e	8.3754e-07	0.0597596	0.229	0.186	0.0160062
Dpf2	8.37971e-07	0.0504581	0.168	0.13	0.0160145
Rap1b	8.38101e-07	0.0566983	0.268	0.223	0.016017
Ephb1	8.3897e-07	-0.0533319	0.402	0.393	0.0160335
Cct7	8.40993e-07	0.0527175	0.282	0.238	0.0160722
Mrps27	8.44517e-07	0.048861	0.12	0.088	0.0161396
Dhrs7	8.44798e-07	-0.0475432	0.598	0.584	0.0161449
4933439C10Rik	8.48948e-07	0.0428985	0.096	0.067	0.0162242
Fads2	8.6044e-07	0.0487827	0.807	0.763	0.0164439
Usf3	8.6316e-07	0.049416	0.163	0.126	0.0164959
Nedd4l	8.66817e-07	0.0584867	0.566	0.513	0.0165657
Npas2	8.67577e-07	0.0900373	0.503	0.45	0.0165803
Eif4a3	8.68406e-07	0.0509683	0.235	0.194	0.0165961
Lactb2	8.73867e-07	0.056206	0.212	0.17	0.0167005
Ptprm	8.75543e-07	0.049685	0.545	0.493	0.0167325
Pla2g7	8.75688e-07	-0.103169	0.984	0.983	0.0167353
Snta1	8.90607e-07	0.0558467	0.4	0.35	0.0170204
Mapk1ip1l	8.98736e-07	0.0105081	0.179	0.155	0.0171757
Rpl6	9.02479e-07	0.0897202	0.784	0.743	0.0172473
Rassf1	9.0849e-07	0.0459198	0.119	0.087	0.0173621
Ttc4	9.08599e-07	0.0497044	0.26	0.217	0.0173642
Med29	9.13522e-07	0.0361217	0.203	0.168	0.0174583
Exosc4	9.14813e-07	0.0620013	0.202	0.161	0.017483
1810037I17Rik	9.14926e-07	-0.0862533	0.631	0.639	0.0174851
Wdr37	9.30294e-07	0.00524666	0.227	0.205	0.0177789
Gm47781	9.38107e-07	-0.0466897	0.069	0.091	0.0179282
Ctdsp2	9.41114e-07	0.0534995	0.241	0.198	0.0179856
Akap10	9.43578e-07	0.0434874	0.255	0.214	0.0180327
Mfsd11	9.61653e-07	0.0525672	0.182	0.143	0.0183782
Rtn3	9.6327e-07	-0.0650163	0.862	0.855	0.0184091
Pin1	9.6898e-07	0.0470454	0.244	0.204	0.0185182
Ndufs7	9.71354e-07	-0.0114158	0.633	0.598	0.0185635
Megf10	9.71989e-07	0.0648613	0.661	0.609	0.0185757
Fbxl3	9.92861e-07	0.0340332	0.31	0.27	0.0189746
Tmsb4x	9.94249e-07	0.137669	0.795	0.765	0.0190011
Sqle	1.00703e-06	0.0604437	0.36	0.311	0.0192454
Cmtm3	1.01045e-06	0.0543636	0.195	0.155	0.0193107
Dnajb1	1.02679e-06	0.0295596	0.068	0.045	0.019623
Maco1	1.03956e-06	0.0586959	0.197	0.156	0.019867
Rpap2	1.04953e-06	-0.00578417	0.131	0.121	0.0200576
Creb3l2	1.06441e-06	0.0523382	0.167	0.13	0.0203419
Naa15	1.07044e-06	0.0469092	0.285	0.241	0.0204572
Bmp2k	1.08134e-06	0.0721729	0.572	0.519	0.0206655
Pkm	1.08951e-06	-0.0469657	0.644	0.628	0.0208216
Hdac2	1.09094e-06	0.0595428	0.182	0.143	0.020849
Keap1	1.09526e-06	0.0360971	0.129	0.099	0.0209315
Sfr1	1.09581e-06	0.0273022	0.339	0.3	0.020942
Eif2b2	1.10803e-06	0.0424041	0.125	0.093	0.0211755
Slc35f1	1.11584e-06	0.0793627	0.152	0.116	0.0213248
Cand1	1.11618e-06	0.0326464	0.259	0.221	0.0213314
Gsr	1.12651e-06	0.0565285	0.205	0.164	0.0215287
Ino80e	1.12944e-06	0.047556	0.124	0.091	0.0215848
Asb8	1.13478e-06	0.0752062	0.313	0.265	0.0216868
Ndufb2	1.13506e-06	-0.0522765	0.611	0.6	0.0216921
Rpl7l1	1.13662e-06	0.0584664	0.211	0.17	0.021722
Ablim1	1.14302e-06	0.0356382	0.404	0.359	0.0218442
Tmem164	1.1431e-06	0.0919776	0.696	0.651	0.0218457
Vtn	1.15479e-06	0.0375516	0.027	0.013	0.0220692
Aldh2	1.1559e-06	0.0533125	0.58	0.529	0.0220903
Zranb2	1.16262e-06	0.0177119	0.645	0.604	0.0222189
Sdhaf2	1.1638e-06	0.0493186	0.196	0.157	0.0222413
Cpsf3	1.16838e-06	0.053056	0.177	0.139	0.0223289
Sesn1	1.16892e-06	0.0382373	0.507	0.46	0.0223391
Mbnl1	1.18102e-06	0.0542853	0.646	0.597	0.0225705
Tnks2	1.18923e-06	0.0370621	0.383	0.339	0.0227274
Med7	1.18957e-06	0.0457636	0.221	0.182	0.0227339
Asic2	1.19451e-06	0.101845	0.493	0.444	0.0228283
Lurap1	1.19501e-06	0.0488504	0.149	0.114	0.0228379
Zic2	1.20729e-06	0.0457805	0.113	0.082	0.0230724
Snrnp40	1.21091e-06	0.0286596	0.161	0.132	0.0231417
Slc12a4	1.2112e-06	0.0603506	0.236	0.193	0.0231472
Srsf9	1.21653e-06	0.0470881	0.217	0.177	0.0232492
Chsy1	1.21985e-06	0.0623861	0.257	0.212	0.0233126
Ppargc1a	1.22225e-06	-0.00406303	0.68	0.643	0.0233585
Slc1a2	1.22255e-06	-0.0923726	1	1	0.0233642
Sox11	1.23202e-06	0.0459431	0.104	0.074	0.023545
Clic1	1.23987e-06	0.0612923	0.148	0.113	0.0236952
2610001J05Rik	1.24079e-06	0.0402843	0.228	0.19	0.0237128
Kctd1	1.24531e-06	0.0684981	0.318	0.271	0.0237992
Riok3	1.24879e-06	0.0409851	0.321	0.279	0.0238656
Larp4	1.25171e-06	0.0479211	0.333	0.288	0.0239215
Uba2	1.25757e-06	0.0491928	0.208	0.168	0.0240334
Med21	1.25813e-06	0.0391061	0.264	0.226	0.0240441
Rraga	1.26602e-06	0.0212653	0.289	0.254	0.0241948
Plrg1	1.26941e-06	0.0239141	0.074	0.053	0.0242597
Rbmxl1	1.27257e-06	0.0543759	0.191	0.152	0.0243201
Mettl5	1.28065e-06	0.0464559	0.141	0.107	0.0244746
Ggnbp1	1.28329e-06	0.0288352	0.11	0.083	0.024525
Elovl5	1.30102e-06	0.0268194	0.654	0.61	0.0248639
Dcaf6	1.31209e-06	0.0366679	0.299	0.26	0.0250753
Rasgrf1	1.34508e-06	-0.0501506	0.041	0.063	0.0257059
Pcnt	1.35714e-06	0.0302917	0.118	0.09	0.0259363
Spsb3	1.36224e-06	0.0469454	0.149	0.114	0.0260337
Prickle1	1.36593e-06	0.0554211	0.219	0.179	0.0261043
Ncstn	1.37807e-06	0.045138	0.147	0.113	0.0263362
Cdc40	1.38748e-06	0.0487471	0.268	0.225	0.0265162
Siglech	1.40095e-06	0.0331846	0.033	0.017	0.0267736
Psmb2	1.40541e-06	0.0722294	0.487	0.435	0.0268588
Rnf138	1.40742e-06	0.0417785	0.212	0.175	0.0268973
Nhsl1	1.41801e-06	0.0895939	0.861	0.828	0.0270995
Hsd17b12	1.41981e-06	0.0300505	0.581	0.535	0.027134
Bzw1	1.42514e-06	0.0253841	0.346	0.309	0.0272358
Arnt	1.4395e-06	0.0506569	0.318	0.273	0.0275103
Mpc2	1.4402e-06	-0.0129249	0.65	0.62	0.0275236
Pwwp2a	1.44129e-06	0.0481718	0.199	0.161	0.0275446
Ube3c	1.44278e-06	0.0182932	0.371	0.334	0.0275729
Zfp799	1.46254e-06	0.0489684	0.181	0.144	0.0279506
Cipc	1.46659e-06	0.00564893	0.29	0.264	0.028028
Cdkn2d	1.47068e-06	0.0560842	0.14	0.106	0.0281062
Sox9	1.47899e-06	0.070598	0.862	0.828	0.028265
Polr2c	1.47932e-06	0.0667393	0.221	0.18	0.0282712
Ier5	1.4943e-06	0.0507385	0.111	0.08	0.0285576
Disp3	1.49835e-06	0.0416111	0.159	0.125	0.028635
Chmp1b	1.50656e-06	0.0477973	0.131	0.098	0.028792
Zfp800	1.50714e-06	0.0666238	0.246	0.202	0.0288029
Pycr2	1.50749e-06	0.0501564	0.157	0.122	0.0288097
Foxo1	1.50783e-06	0.0149164	0.678	0.635	0.0288161
Myorg	1.50786e-06	0.0586073	0.457	0.406	0.0288166
Zcchc9	1.50853e-06	0.0659013	0.241	0.199	0.0288295
Bdh2	1.50996e-06	-0.0311159	0.025	0.044	0.0288568
Mt1	1.51047e-06	-0.208676	0.994	0.997	0.0288666
Gars	1.51411e-06	0.0340548	0.127	0.097	0.0289362
Hnrnpf	1.52943e-06	0.0594275	0.37	0.322	0.029229
Lrig1	1.53258e-06	0.0687998	0.373	0.324	0.0292891
Hmgcl	1.53527e-06	0.062329	0.192	0.153	0.0293406
Hbegf	1.58527e-06	0.0758626	0.339	0.291	0.0302962
Ncbp3	1.58819e-06	0.0518415	0.161	0.125	0.0303519
Dpysl2	1.58939e-06	0.00125995	0.612	0.574	0.0303749
Fndc4	1.5999e-06	0.0595588	0.29	0.245	0.0305757
Yju2	1.60391e-06	0.0346945	0.08	0.055	0.0306524
Dusp11	1.6093e-06	0.0705389	0.402	0.352	0.0307553
Mrpl34	1.61682e-06	0.0584059	0.342	0.295	0.030899
Rpsa	1.62469e-06	0.0360596	0.673	0.627	0.0310495
Pip4p1	1.63811e-06	0.054475	0.205	0.165	0.0313059
Mrpl44	1.63821e-06	0.0500162	0.119	0.088	0.0313078
Rab18	1.6501e-06	0.000853352	0.39	0.36	0.0315351
Srm	1.6662e-06	0.0469668	0.138	0.105	0.0318427
Zfp236	1.66675e-06	0.0426085	0.171	0.136	0.0318533
Grk4	1.67317e-06	-0.00248516	0.167	0.152	0.0319759
Faf2	1.69478e-06	0.0391948	0.265	0.226	0.032389
Mrrf	1.69614e-06	0.0257428	0.107	0.082	0.0324149
Hsbp1	1.69743e-06	-0.0527109	0.495	0.488	0.0324396
Gmps	1.69757e-06	0.0609366	0.268	0.223	0.0324422
Metap1d	1.70186e-06	-0.00331901	0.288	0.266	0.0325242
Taf10	1.70561e-06	0.0464476	0.246	0.206	0.0325959
Stx17	1.70789e-06	0.0204251	0.147	0.123	0.0326395
Pcf11	1.70845e-06	0.0521075	0.243	0.2	0.0326502
Ubtf	1.70905e-06	0.0461261	0.175	0.139	0.0326617
Ppp1r35	1.71394e-06	0.0328702	0.156	0.126	0.032755
Npc1	1.7153e-06	0.029804	0.301	0.263	0.0327812
Gm27239	1.73397e-06	0.0543836	0.141	0.109	0.033138
Ndufa2	1.73703e-06	-0.0759451	0.7	0.701	0.0331964
Mdh2	1.77074e-06	0.0297014	0.494	0.449	0.0338406
Endog	1.77308e-06	0.0405366	0.179	0.144	0.0338854
Rbfox3	1.78977e-06	-0.0329856	0.014	0.027	0.0342042
Mcur1	1.79969e-06	0.0281969	0.374	0.334	0.0343938
Adcy9	1.81289e-06	0.057006	0.281	0.237	0.0346462
Alpl	1.82696e-06	0.0541074	0.147	0.113	0.034915
Ptk2	1.84847e-06	-0.0120758	0.654	0.626	0.0353262
Igsf11	1.85125e-06	0.0633247	0.635	0.584	0.0353792
Lss	1.85319e-06	0.046176	0.135	0.102	0.0354164
Ddit4	1.86217e-06	0.0198287	0.334	0.298	0.0355879
Sox5	1.86283e-06	0.0696536	0.836	0.798	0.0356005
Rhob	1.86298e-06	0.0667585	0.434	0.384	0.0356035
Chpt1	1.87753e-06	-0.0118837	0.676	0.646	0.0358814
Adipor2	1.88317e-06	0.0581795	0.237	0.195	0.0359893
Tmem212	1.89265e-06	0.00569517	0.004	0	0.0361704
P4hb	1.89612e-06	0.0491605	0.291	0.247	0.0362367
Coa7	1.89923e-06	0.0365697	0.089	0.062	0.0362961
Arhgef4	1.8998e-06	0.0793527	0.589	0.539	0.0363071
Dagla	1.95753e-06	0.0301717	0.171	0.14	0.0374104
Kdm3a	1.95922e-06	0.0155042	0.37	0.335	0.0374427
Sox4	1.95959e-06	0.030204	0.097	0.072	0.0374497
Fam160b2	1.9613e-06	0.0435911	0.092	0.065	0.0374823
Gtf2a2	1.96226e-06	0.0310753	0.299	0.262	0.0375007
Aprt	1.96365e-06	0.0386401	0.184	0.15	0.0375273
Asah1	1.98535e-06	0.0518595	0.586	0.536	0.037942
Pcsk1n	1.99009e-06	-0.0681169	0.322	0.335	0.0380327
Ggnbp2	1.992e-06	0.0430775	0.372	0.328	0.0380692
Stk17b	2.0304e-06	0.0618804	0.282	0.237	0.038803
K230015D01Rik	2.03437e-06	0.0175291	0.016	0.006	0.0388789
Rmdn1	2.03621e-06	0.0468033	0.425	0.378	0.0389141
Ap5s1	2.03903e-06	0.0448959	0.097	0.071	0.038968
Cd52	2.04234e-06	0.0301309	0.029	0.014	0.0390312
Slc25a5	2.04529e-06	0.092853	0.756	0.715	0.0390876
Atn1	2.05809e-06	0.0224411	0.197	0.168	0.0393322
Dhx36	2.08266e-06	-0.0277621	0.531	0.512	0.0398018
Rpl5	2.09155e-06	0.050727	0.556	0.507	0.0399716
Exoc6b	2.09421e-06	0.0484975	0.466	0.418	0.0400224
Elp1	2.09544e-06	0.0483603	0.155	0.12	0.0400459
Mxd4	2.10195e-06	0.0469369	0.348	0.303	0.0401705
Cnnm3	2.10352e-06	0.0452485	0.168	0.132	0.0402003
Neurl4	2.10915e-06	0.040308	0.08	0.055	0.040308
Bmpr2	2.10958e-06	0.0269334	0.365	0.327	0.0403163
Phactr3	2.12318e-06	0.0267198	0.852	0.814	0.0405761
Isg20l2	2.12792e-06	0.0263004	0.065	0.044	0.0406667
4833420G17Rik	2.13294e-06	0.0517453	0.292	0.248	0.0407627
Fus	2.14624e-06	0.0491101	0.598	0.548	0.0410169
Tgfb2	2.14881e-06	0.0604458	0.28	0.236	0.0410658
Pitpnb	2.15038e-06	0.051446	0.226	0.186	0.0410959
Snx11	2.15794e-06	0.0349838	0.098	0.071	0.0412404
Upf3b	2.15987e-06	0.0521814	0.227	0.186	0.0412773
Ift20	2.16061e-06	0.0529848	0.278	0.235	0.0412915
Zfp354c	2.18763e-06	0.0495119	0.132	0.099	0.0418078
Slc23a2	2.2253e-06	0.0363271	0.271	0.233	0.0425277
2310011J03Rik	2.25645e-06	0.0445831	0.184	0.148	0.0431231
Mapk14	2.25997e-06	0.0382352	0.152	0.12	0.0431903
Erc1	2.2654e-06	0.0671744	0.409	0.359	0.043294
Arid4a	2.28218e-06	0.0369817	0.342	0.301	0.0436148
Znrd1	2.29053e-06	0.0541148	0.226	0.186	0.0437742
Hspa9	2.29955e-06	0.0154324	0.391	0.357	0.0439467
Atg10	2.29972e-06	-0.00909084	0.152	0.14	0.04395
Rb1	2.30483e-06	0.03549	0.761	0.718	0.0440476
Ptpn1	2.3168e-06	0.0590499	0.207	0.166	0.0442763
Folh1	2.31762e-06	0.0644124	0.338	0.291	0.0442921
Sin3b	2.32474e-06	0.0186546	0.302	0.269	0.044428
Ncam2	2.34362e-06	0.11933	0.72	0.679	0.044789
Ndufa10	2.34372e-06	0.0418666	0.403	0.358	0.0447909
Kank2	2.34955e-06	0.0356151	0.088	0.062	0.0449022
Lxn	2.36195e-06	0.0243275	0.642	0.597	0.0451393
Ppp1r2	2.37607e-06	-0.00777681	0.349	0.324	0.0454091
Spindoc	2.38459e-06	0.037656	0.131	0.101	0.0455719
Rab26os	2.38607e-06	0.0432963	0.122	0.091	0.0456003
Cyp2u1	2.39835e-06	0.03252	0.139	0.11	0.0458348
Polr3d	2.40288e-06	0.0497612	0.15	0.116	0.0459214
Urgcp	2.42207e-06	0.0428508	0.263	0.223	0.0462882
Grhl1	2.42253e-06	0.0575749	0.207	0.167	0.046297
Med22	2.43314e-06	0.0442085	0.09	0.064	0.0464997
Cdk2ap1	2.44397e-06	0.0494749	0.228	0.188	0.0467066
Mrpl42	2.45504e-06	-0.00484409	0.406	0.377	0.0469183
Rhobtb3	2.48676e-06	-0.0162575	0.33	0.316	0.0475245
Clcn5	2.49579e-06	0.0576303	0.191	0.152	0.0476971
Kbtbd11	2.50043e-06	0.0562149	0.365	0.317	0.0477857
Cpne3	2.51032e-06	0.0429963	0.27	0.229	0.0479747
Rif1	2.51234e-06	0.0513628	0.264	0.222	0.0480134
Ctr9	2.51895e-06	0.0225037	0.156	0.13	0.0481396
Cript	2.53476e-06	0.0299241	0.312	0.274	0.0484418
Kif13a	2.54341e-06	0.0640614	0.252	0.209	0.0486071
Hnrnpc	2.54364e-06	-0.00761995	0.526	0.497	0.0486115
Rpp38	2.572e-06	0.0424528	0.1	0.072	0.0491535
Rsf1	2.57613e-06	0.0108694	0.473	0.437	0.0492324
Gmpr2	2.60803e-06	0.0331173	0.166	0.135	0.049842
Srebf2	2.61027e-06	0.0382012	0.42	0.377	0.0498848
Cox17	2.6138e-06	-0.0247462	0.466	0.444	0.0499524
Lap3	2.61776e-06	0.0378517	0.631	0.584	0.050028
Cnbd2	2.63155e-06	0.0451936	0.104	0.075	0.0502916
Zfp871	2.6335e-06	0.0516016	0.29	0.247	0.0503289
Fip1l1	2.63778e-06	0.0475572	0.267	0.226	0.0504106
Ppil4	2.64106e-06	0.0435449	0.223	0.185	0.0504733
Ubald2	2.65341e-06	0.0453824	0.166	0.131	0.0507093
Rnf169	2.68508e-06	0.0400724	0.25	0.212	0.0513145
Pnrc1	2.70946e-06	0.058307	0.277	0.233	0.0517805
Ahsa2	2.71814e-06	0.0507256	0.14	0.106	0.0519464
AW047730	2.71967e-06	0.0600022	0.757	0.712	0.0519757
Cklf	2.73572e-06	0.0504815	0.157	0.122	0.0522824
Dapk2	2.73761e-06	0.0303947	0.033	0.018	0.0523184
Rasa2	2.74141e-06	-0.0947837	0.822	0.832	0.0523911
Tex10	2.74396e-06	0.053664	0.163	0.127	0.0524399
Slc25a17	2.749e-06	0.0229108	0.208	0.179	0.0525362
Myh14	2.75984e-06	0.0448414	0.261	0.221	0.0527434
Ppm1g	2.76309e-06	0.0378814	0.149	0.118	0.0528054
Ptprz1	2.76522e-06	0.063922	0.999	0.999	0.0528461
1110065P20Rik	2.76704e-06	0.0580708	0.26	0.217	0.0528808
Commd2	2.77916e-06	0.0369188	0.144	0.113	0.0531125
Alpk1	2.78705e-06	0.0687575	0.349	0.302	0.0532634
Hspa13	2.80813e-06	0.0583591	0.21	0.17	0.0536662
Tmed5	2.81084e-06	0.0640705	0.68	0.633	0.053718
Kctd12	2.81161e-06	0.0336355	0.039	0.022	0.0537326
Trappc4	2.83209e-06	0.0575446	0.313	0.269	0.0541241
Pdss1	2.84365e-06	0.058147	0.207	0.168	0.0543449
Tubgcp3	2.86629e-06	0.0485817	0.136	0.103	0.0547777
N4bp1	2.86929e-06	0.0354604	0.149	0.118	0.054835
Sesn3	2.87417e-06	-0.0567486	0.6	0.598	0.0549282
Naglu	2.87982e-06	0.0294282	0.061	0.039	0.0550362
Ptpra	2.90139e-06	-0.0293566	0.646	0.626	0.0554484
Cltc	2.9062e-06	-0.000601755	0.654	0.618	0.0555405
Tuba1a	2.90719e-06	0.0631581	0.601	0.551	0.0555593
Myl12a	2.91991e-06	0.0341668	0.135	0.105	0.0558024
Stx12	2.92601e-06	0.0463167	0.232	0.193	0.0559189
Capzb	2.9607e-06	-0.00153956	0.272	0.25	0.0565819
Gtf2i	2.96549e-06	0.0376594	0.536	0.489	0.0566735
Cyc1	2.96686e-06	0.0662105	0.535	0.484	0.0566997
Spop	2.97628e-06	-0.0421276	0.278	0.28	0.0568798
Ctps2	2.98546e-06	0.0218878	0.129	0.105	0.0570552
Eya1	2.988e-06	0.0863539	0.491	0.441	0.0571037
Zfp266	3.02601e-06	0.0502419	0.328	0.284	0.0578301
Tmem127	3.02715e-06	0.0362603	0.124	0.094	0.0578519
Tfg	3.04871e-06	0.0436125	0.226	0.188	0.0582638
Asap1	3.04871e-06	0.00497434	0.371	0.341	0.058264
1810013L24Rik	3.06927e-06	0.0483846	0.359	0.313	0.0586569
Wasf2	3.07291e-06	0.0397354	0.238	0.2	0.0587264
Arl4a	3.07771e-06	0.0402352	0.098	0.07	0.0588181
Crebzf	3.08932e-06	0.0656945	0.294	0.249	0.0590399
Gm3764	3.11011e-06	0.0890034	0.97	0.966	0.0594373
Ogdh	3.11679e-06	0.0286564	0.307	0.27	0.0595649
Smn1	3.15295e-06	0.0321854	0.13	0.102	0.060256
Acads	3.155e-06	0.0371499	0.174	0.141	0.0602951
Vezf1	3.16378e-06	0.0542148	0.33	0.285	0.0604631
Cdkn1b	3.16988e-06	0.0544286	0.3	0.257	0.0605795
Znrf1	3.17366e-06	0.0360694	0.166	0.135	0.0606519
Nhlrc2	3.18455e-06	0.0404882	0.19	0.155	0.06086
Alg8	3.1861e-06	0.0250522	0.065	0.045	0.0608896
Ndufv2	3.19033e-06	0.0313644	0.675	0.632	0.0609705
Orc3	3.20238e-06	0.0232512	0.225	0.195	0.0612006
Gabra2	3.20328e-06	0.0269499	0.482	0.44	0.0612179
Kif3a	3.26938e-06	0.0416785	0.223	0.186	0.0624811
Mtor	3.2823e-06	0.0431009	0.256	0.216	0.062728
Acat1	3.28281e-06	0.00546156	0.407	0.376	0.0627379
Mphosph10	3.29759e-06	0.0471867	0.16	0.125	0.0630202
Ptov1	3.30794e-06	0.0341377	0.369	0.329	0.0632181
2810459M11Rik	3.32367e-06	0.0529606	0.206	0.167	0.0635186
Coq10b	3.32665e-06	-0.0469685	0.279	0.273	0.0635756
Med1	3.32831e-06	0.0387066	0.209	0.174	0.0636074
Lasp1	3.33367e-06	0.0580041	0.233	0.191	0.0637098
Tmx1	3.3363e-06	0.0447055	0.263	0.223	0.06376
Usp46	3.36002e-06	0.0477036	0.19	0.153	0.0642134
B2m	3.37922e-06	0.0383693	0.241	0.205	0.0645802
Pcbp2	3.37959e-06	-0.00337403	0.54	0.509	0.0645873
Rbm33	3.42019e-06	0.0254748	0.3	0.265	0.0653632
Rbx1	3.44088e-06	-0.00453476	0.626	0.592	0.0657587
Tox	3.44975e-06	0.110719	0.823	0.797	0.0659282
Ddx3x	3.50174e-06	0.00604532	0.3	0.274	0.0669217
Mcrs1	3.51587e-06	0.0278904	0.12	0.094	0.0671917
Stx5a	3.52398e-06	0.0280311	0.22	0.188	0.0673469
Mphosph6	3.54367e-06	0.0498599	0.185	0.148	0.067723
Tafa1	3.54554e-06	0.0958157	0.119	0.093	0.0677588
Zfp644	3.55623e-06	0.0455098	0.381	0.337	0.0679631
Mapk8ip3	3.58473e-06	0.0498333	0.297	0.254	0.0685078
Rnf115	3.58879e-06	0.0314514	0.287	0.25	0.0685853
Dmac2	3.61986e-06	0.044632	0.14	0.107	0.0691792
Xpo5	3.62086e-06	0.0340916	0.167	0.135	0.0691982
Ythdc1	3.62236e-06	0.0035984	0.344	0.316	0.0692269
Surf4	3.62601e-06	0.0465512	0.225	0.186	0.0692967
Dbt	3.64479e-06	0.0537076	0.221	0.182	0.0696556
Zic5	3.68065e-06	0.0389439	0.157	0.124	0.0703409
Fam13c	3.68239e-06	0.0363699	0.762	0.719	0.0703741
B230118H07Rik	3.69494e-06	-0.0154325	0.254	0.241	0.070614
Akt2	3.72994e-06	0.0646613	0.405	0.356	0.071283
Gfer	3.75717e-06	0.0318899	0.122	0.094	0.0718033
Tbrg1	3.776e-06	0.0613373	0.252	0.21	0.0721631
Dpm1	3.79333e-06	0.0201793	0.503	0.463	0.0724943
Gna11	3.80345e-06	0.0266744	0.217	0.186	0.0726877
Lmbrd1	3.82424e-06	0.00431494	0.503	0.469	0.073085
Ube2g2	3.84421e-06	0.029716	0.079	0.055	0.0734667
Tekt4	3.85353e-06	0.0292748	0.059	0.039	0.0736447
R3hdm1	3.86961e-06	0.0533543	0.593	0.544	0.0739521
Mcl1	3.88416e-06	0.038675	0.202	0.167	0.0742302
Grb2	3.88482e-06	0.0452658	0.263	0.222	0.0742428
Glul	3.89009e-06	0.0430697	0.998	0.999	0.0743435
Lgmn	3.90897e-06	0.0669754	0.265	0.222	0.0747042
Shprh	3.92035e-06	0.0433524	0.243	0.203	0.0749218
Zbed3	3.9418e-06	0.0486418	0.115	0.086	0.0753318
Pak1ip1	3.95859e-06	0.057175	0.25	0.208	0.0756527
Ccdc61	3.9594e-06	0.041461	0.108	0.079	0.0756681
Id4	3.96616e-06	0.0900888	0.912	0.9	0.0757973
Map7d2	3.98667e-06	0.0424221	0.214	0.178	0.0761892
Kctd5	4.0219e-06	0.0549615	0.304	0.26	0.0768626
Setd5	4.02273e-06	0.0638482	0.509	0.458	0.0768785
Adnp	4.02285e-06	0.0352711	0.323	0.284	0.0768807
Clpp	4.04438e-06	0.0536905	0.352	0.307	0.0772922
Snw1	4.10056e-06	0.0252327	0.315	0.279	0.0783659
Trnt1	4.10283e-06	0.0326642	0.161	0.13	0.0784092
Sdhaf1	4.10472e-06	0.0335092	0.13	0.102	0.0784453
Zfp422	4.10564e-06	0.0231369	0.103	0.08	0.0784629
Peli1	4.12019e-06	0.037001	0.34	0.299	0.078741
Pan3	4.12151e-06	-0.0107117	0.422	0.399	0.0787662
Cacng7	4.13263e-06	0.0437456	0.145	0.112	0.0789787
Akt1s1	4.13661e-06	0.0457201	0.172	0.137	0.0790547
Atox1	4.19585e-06	-0.0323503	0.344	0.334	0.0801868
Gclm	4.20852e-06	-0.0436771	0.391	0.384	0.0804291
Eno2	4.21527e-06	-0.04276	0.04	0.059	0.080558
Pfkfb3	4.22485e-06	0.0565153	0.189	0.152	0.0807411
Itgav	4.22515e-06	0.0663466	0.708	0.663	0.0807468
Ssna1	4.23552e-06	0.0576854	0.195	0.157	0.0809449
Syn2	4.26073e-06	0.0310336	0.385	0.345	0.0814268
Arpc1b	4.26962e-06	0.0380624	0.079	0.054	0.0815968
Gt(ROSA)26Sor	4.27334e-06	0.00344589	0.204	0.185	0.0816678
Ankrd10	4.27744e-06	0.0541023	0.201	0.163	0.0817461
Hexa	4.3205e-06	0.0620302	0.244	0.203	0.082569
Lypd6	4.32362e-06	-0.0201242	0.385	0.363	0.0826286
Safb	4.32649e-06	0.0400971	0.251	0.213	0.0826835
Gosr1	4.3728e-06	0.0176794	0.174	0.149	0.0835686
Aimp1	4.38384e-06	0.0573148	0.286	0.242	0.0837796
Lncppara	4.38965e-06	0.0616004	0.261	0.218	0.0838906
Efr3b	4.41764e-06	-0.0514734	0.56	0.551	0.0844255
Pfkm	4.4258e-06	0.00715254	0.567	0.533	0.0845815
Cd300c2	4.42976e-06	0.0289603	0.026	0.013	0.0846571
Ube3a	4.4481e-06	0.02703	0.59	0.546	0.0850077
Zhx2	4.4629e-06	0.0220063	0.423	0.383	0.0852905
Mro	4.5007e-06	0.0021548	0.36	0.333	0.0860129
Inpp4b	4.53374e-06	0.058948	0.128	0.096	0.0866443
Alas1	4.53588e-06	0.0485034	0.151	0.117	0.0866852
Skp1a	4.56289e-06	-0.0669037	0.541	0.548	0.0872014
Sirt1	4.56426e-06	0.0399298	0.12	0.091	0.0872275
Thap2	4.56739e-06	0.0573759	0.303	0.258	0.0872874
Pex16	4.58291e-06	0.042948	0.154	0.121	0.0875839
Eps15l1	4.60026e-06	0.042788	0.267	0.227	0.0879156
Lrrfip1	4.60172e-06	0.028036	0.08	0.058	0.0879435
Gm16286	4.60624e-06	0.0435334	0.174	0.139	0.0880298
Gpd1	4.60831e-06	0.0378584	0.097	0.069	0.0880695
Trim28	4.61153e-06	0.0296069	0.117	0.09	0.088131
Chfr	4.63273e-06	0.0266485	0.236	0.204	0.0885361
Sympk	4.67133e-06	0.0461336	0.155	0.121	0.0892738
Virma	4.68202e-06	0.0403257	0.221	0.185	0.0894781
Ankrd9	4.6942e-06	0.0409959	0.121	0.092	0.0897108
Suclg1	4.6971e-06	-0.0157199	0.738	0.708	0.0897663
Mrps16	4.71369e-06	0.0635739	0.308	0.263	0.0900833
Ptchd4	4.73431e-06	0.0915123	0.365	0.319	0.0904774
Epc1	4.74444e-06	-0.000197795	0.658	0.625	0.0906711
Uba1	4.7702e-06	0.0382419	0.241	0.205	0.0911633
Rngtt	4.80404e-06	0.0629665	0.291	0.247	0.0918101
Phf3	4.80514e-06	0.0301214	0.374	0.335	0.091831
Cavin3	4.80783e-06	0.048964	0.417	0.371	0.0918825
Rnd3	4.81086e-06	0.0624771	0.178	0.142	0.0919404
Lynx1	4.83289e-06	0.0404371	0.097	0.07	0.0923613
Cmip	4.84719e-06	0.00220084	0.352	0.323	0.0926347
Caskin1	4.86941e-06	0.0294978	0.411	0.371	0.0930593
Spns1	4.89244e-06	0.0467786	0.182	0.146	0.0934995
Swap70	4.9534e-06	0.0584173	0.332	0.286	0.0946645
Atp6v0c	4.97168e-06	-0.0916619	0.847	0.861	0.0950137
Ddx56	4.98507e-06	0.0362547	0.07	0.047	0.0952697
Orc6	4.99208e-06	0.0306974	0.261	0.227	0.0954036
4930430F08Rik	5.00872e-06	0.0319672	0.162	0.132	0.0957216
Brk1	5.02138e-06	-0.00557329	0.468	0.44	0.0959636
Ybx1	5.04276e-06	0.0695131	0.43	0.382	0.0963722
Dctn1	5.08116e-06	0.0402113	0.189	0.154	0.097106
Mettl1	5.08512e-06	0.0362103	0.091	0.065	0.0971818
Arid5a	5.09269e-06	0.0553246	0.187	0.15	0.0973264
Drg2	5.09282e-06	0.0379778	0.105	0.078	0.0973289
Tbcb	5.11857e-06	0.0441506	0.324	0.283	0.097821
Echdc1	5.14849e-06	0.0540988	0.332	0.287	0.0983928
Oxa1l	5.17214e-06	0.0334075	0.22	0.186	0.0988447
Ranbp3l	5.18072e-06	0.0399789	0.386	0.343	0.0990088
Gcnt4	5.18579e-06	0.037707	0.212	0.177	0.0991057
Gsta4	5.21666e-06	-0.0140787	0.256	0.24	0.0996955
Celsr2	5.25757e-06	0.0283651	0.176	0.146	0.100477
Tor1aip1	5.25819e-06	1.45711e-05	0.4	0.374	0.100489
Scd2	5.26501e-06	0.0803423	0.966	0.954	0.10062
Slc39a14	5.27367e-06	0.0165442	0.161	0.138	0.100785
Gm13830	5.28735e-06	0.0251236	0.047	0.029	0.101047
Rap1gds1	5.33839e-06	0.0414919	0.281	0.241	0.102022
Yy1	5.34045e-06	0.0517797	0.28	0.237	0.102061
Acox1	5.36079e-06	-0.00151412	0.414	0.385	0.10245
BC052040	5.37924e-06	0.0482098	0.163	0.128	0.102803
Kcnma1	5.41625e-06	0.0667546	0.568	0.519	0.10351
Nus1	5.43189e-06	0.0426502	0.142	0.11	0.103809
Clns1a	5.44282e-06	0.0396483	0.188	0.154	0.104018
Ndufa8	5.4719e-06	0.0323603	0.621	0.577	0.104573
Zcchc10	5.48957e-06	0.0466878	0.108	0.079	0.104911
Idnk	5.49748e-06	0.0431755	0.161	0.128	0.105062
Rnf121	5.5158e-06	0.0457773	0.154	0.12	0.105412
Utp14b	5.56048e-06	-0.00864136	0.502	0.473	0.106266
U2af2	5.57245e-06	0.0367271	0.219	0.184	0.106495
Klf6	5.61568e-06	0.0487252	0.152	0.118	0.107321
Dph5	5.61574e-06	0.0266168	0.124	0.1	0.107322
Snrnp27	5.61721e-06	0.0558837	0.356	0.311	0.107351
Cox6b1	5.64284e-06	-0.0839377	0.784	0.783	0.10784
Spen	5.66488e-06	0.0333611	0.254	0.219	0.108261
S100a1	5.7113e-06	-0.114302	0.818	0.833	0.109149
Pfdn6	5.72625e-06	0.0496673	0.281	0.24	0.109434
Itgb1	5.73333e-06	0.0583923	0.34	0.294	0.10957
Luc7l	5.73506e-06	0.0313446	0.251	0.218	0.109603
Nub1	5.79978e-06	0.0155541	0.185	0.16	0.11084
Nacc2	5.80446e-06	0.05343	0.266	0.224	0.110929
Fam216a	5.81503e-06	0.0433107	0.151	0.118	0.111131
mt-Co2	5.83205e-06	-0.0627728	1	1	0.111456
1110004F10Rik	5.83265e-06	0.0773837	0.553	0.504	0.111468
2900076A07Rik	5.83788e-06	0.034298	0.192	0.16	0.111568
Fasn	5.91777e-06	0.0601738	0.328	0.283	0.113095
Cbfa2t2	5.92439e-06	0.00421719	0.29	0.266	0.113221
S100a8	5.96389e-06	0.0125428	0.008	0.001	0.113976
Dlg1	5.9844e-06	0.0473108	0.493	0.447	0.114368
5031439G07Rik	5.9858e-06	-0.0419399	0.246	0.248	0.114395
Tomm7	6.01494e-06	-0.0616775	0.421	0.42	0.114952
Apln	6.02462e-06	0.0417288	0.227	0.191	0.115136
Coa3	6.06616e-06	0.000616473	0.331	0.304	0.11593
Psmg3	6.13262e-06	0.0431581	0.137	0.105	0.1172
Zfpl1	6.14767e-06	0.0422369	0.115	0.086	0.117488
Abraxas2	6.18137e-06	0.0527988	0.163	0.129	0.118132
Gps2	6.20205e-06	0.0496428	0.213	0.175	0.118527
Frg1	6.2229e-06	0.0686057	0.27	0.228	0.118926
Gm11266	6.23537e-06	0.035887	0.37	0.33	0.119164
Arfgef2	6.26029e-06	0.0536371	0.225	0.186	0.11964
Prkaca	6.33194e-06	0.0630395	0.205	0.169	0.12101
Twf2	6.44844e-06	0.047442	0.112	0.083	0.123236
Trak1	6.45125e-06	0.0534721	0.411	0.365	0.12329
Camk1	6.45358e-06	0.0404657	0.123	0.093	0.123334
Sfswap	6.46611e-06	0.036264	0.263	0.226	0.123574
Pdpn	6.48956e-06	-0.0490818	0.268	0.274	0.124022
Amn1	6.50195e-06	0.0566081	0.265	0.223	0.124259
Twistnb	6.53359e-06	0.023018	0.15	0.123	0.124864
Med13l	6.54026e-06	0.0341497	0.281	0.244	0.124991
9430038I01Rik	6.56125e-06	0.0275668	0.077	0.055	0.125392
Gtf2e2	6.56603e-06	0.0412785	0.152	0.12	0.125483
Lfng	6.56724e-06	0.0608166	0.418	0.371	0.125507
Gm15564	6.57223e-06	-0.0647512	0.248	0.265	0.125602
Dlg5	6.59513e-06	0.0366614	0.375	0.333	0.126039
Scpep1	6.59922e-06	0.0344253	0.166	0.135	0.126118
Eaf1	6.62092e-06	0.0275727	0.065	0.044	0.126532
Strada	6.64722e-06	0.0343967	0.174	0.143	0.127035
Senp6	6.69939e-06	0.0403035	0.423	0.379	0.128032
Prex1	6.76406e-06	0.0164668	0.451	0.415	0.129268
Abcc5	6.77841e-06	0.0451209	0.455	0.41	0.129542
Dcbld2	6.8096e-06	0.0459854	0.127	0.096	0.130138
Zbtb26	6.83044e-06	0.0412792	0.127	0.097	0.130537
Pgls	6.83831e-06	0.0336082	0.265	0.228	0.130687
Paxx	6.84467e-06	0.0609891	0.311	0.266	0.130808
Fam171a1	6.87142e-06	0.0757282	0.35	0.305	0.13132
Ccdc71	6.89123e-06	0.0222402	0.061	0.042	0.131698
Lats1	6.8936e-06	0.0479357	0.219	0.18	0.131744
Ss18l2	6.9199e-06	0.0559878	0.297	0.254	0.132246
Emp2	6.9348e-06	0.0598008	0.279	0.236	0.132531
Tnrc18	6.9399e-06	0.0312804	0.282	0.245	0.132628
Smarcc2	7.08732e-06	0.0194938	0.281	0.251	0.135446
Gm11290	7.16102e-06	0.0211502	0.017	0.007	0.136854
Nr2e1	7.17789e-06	0.044875	0.313	0.272	0.137177
2310022B05Rik	7.22212e-06	0.0693634	0.549	0.5	0.138022
Pias1	7.28077e-06	0.0212901	0.482	0.444	0.139143
Mtss2	7.36233e-06	0.00763482	0.68	0.644	0.140701
Scrib	7.36987e-06	0.0348733	0.065	0.043	0.140846
Scamp2	7.38749e-06	0.0553929	0.301	0.258	0.141182
2310061I04Rik	7.38988e-06	0.0447547	0.156	0.123	0.141228
Tfb2m	7.40894e-06	0.0233749	0.115	0.092	0.141592
Myo9b	7.42772e-06	0.028746	0.114	0.089	0.141951
Rbbp5	7.4384e-06	0.0430868	0.143	0.111	0.142155
Mif	7.47428e-06	-0.0898712	0.673	0.681	0.142841
Mettl3	7.49226e-06	0.0384395	0.122	0.093	0.143185
2410006H16Rik	7.55309e-06	0.0204658	0.176	0.15	0.144347
Anxa6	7.55959e-06	0.0338358	0.198	0.166	0.144471
Rasa1	7.57461e-06	0.0431015	0.332	0.291	0.144758
Kif1a	7.58748e-06	0.0392081	0.419	0.377	0.145004
Rab9	7.5954e-06	0.0616252	0.468	0.42	0.145156
Dag1	7.5998e-06	0.0330574	0.421	0.382	0.14524
6430590A07Rik	7.61192e-06	0.042389	0.268	0.229	0.145471
Cnn3	7.61606e-06	0.0417984	0.681	0.635	0.145551
Tmem259	7.63162e-06	0.0420201	0.231	0.194	0.145848
Ndufs3	7.64849e-06	0.00166236	0.45	0.42	0.14617
Frmpd1	7.66237e-06	0.0339497	0.527	0.482	0.146436
Exoc2	7.67621e-06	0.0404488	0.252	0.215	0.1467
Srek1ip1	7.69056e-06	0.0247439	0.275	0.241	0.146974
Spg11	7.69373e-06	0.0317417	0.135	0.107	0.147035
Rsrc2	7.75657e-06	0.0496447	0.572	0.524	0.148236
Atp5h	7.77179e-06	-0.0741576	0.828	0.82	0.148527
Ptar1	7.78466e-06	0.00585228	0.364	0.335	0.148773
Slc39a13	7.80696e-06	0.0289233	0.155	0.127	0.149199
Grk3	7.82305e-06	-0.027103	0.592	0.574	0.149506
Tcaf1	7.82611e-06	0.0519275	0.328	0.284	0.149565
Zfp87	7.87468e-06	0.0304184	0.074	0.052	0.150493
Ttc9c	7.87935e-06	0.0382604	0.144	0.114	0.150582
Vamp2	7.88312e-06	0.00865243	0.369	0.339	0.150654
Slbp	7.91385e-06	0.0434543	0.139	0.108	0.151242
Mef2d	7.93237e-06	0.0557391	0.18	0.144	0.151596
Nav2	7.94275e-06	0.0286924	0.61	0.568	0.151794
Desi2	7.96475e-06	0.0496357	0.62	0.573	0.152214
Prpsap1	8.00795e-06	0.0386835	0.18	0.146	0.15304
Gm5083	8.01392e-06	0.00829429	0.023	0.013	0.153154
Hnrnpa2b1	8.07319e-06	-0.000778848	0.92	0.894	0.154287
Herc2	8.08003e-06	0.0430351	0.377	0.335	0.154418
Kctd11	8.11863e-06	0.022435	0.029	0.015	0.155155
Rab30	8.13347e-06	0.044249	0.538	0.492	0.155439
Ranbp2	8.17242e-06	0.0332675	0.34	0.303	0.156183
Fam91a1	8.17264e-06	0.0205658	0.158	0.133	0.156187
Maf	8.22219e-06	0.0238794	0.038	0.022	0.157134
Nup98	8.2403e-06	0.00552094	0.343	0.316	0.15748
Timm9	8.25507e-06	0.0520529	0.243	0.203	0.157763
Cdc42se2	8.26008e-06	0.0153916	0.226	0.2	0.157858
Lgi1	8.26044e-06	-0.0238446	0.447	0.424	0.157865
Eed	8.30157e-06	0.0433125	0.157	0.124	0.158651
Sepsecs	8.3325e-06	0.0288805	0.159	0.131	0.159242
Adck1	8.38788e-06	0.0280094	0.165	0.137	0.160301
Tle1	8.38881e-06	-0.00429596	0.506	0.476	0.160319
Nme2	8.40215e-06	0.0275778	0.628	0.586	0.160574
Tcea1	8.40938e-06	0.0414869	0.483	0.439	0.160712
L2hgdh	8.43973e-06	0.0356703	0.124	0.096	0.161292
Colgalt2	8.44591e-06	0.0304391	0.178	0.148	0.16141
Txndc15	8.47034e-06	0.0482987	0.342	0.299	0.161877
Gpd2	8.51231e-06	0.0587539	0.47	0.423	0.162679
Per1	8.51758e-06	0.0554237	0.244	0.203	0.16278
Caskin2	8.52812e-06	0.0306553	0.128	0.102	0.162981
Cnep1r1	8.54236e-06	0.00861804	0.204	0.183	0.163253
Hif1an	8.54564e-06	0.0334347	0.09	0.065	0.163316
Mrpl14	8.54579e-06	0.0156705	0.224	0.196	0.163319
Caprin1	8.54629e-06	0.0525035	0.351	0.307	0.163328
Zfp521	8.54861e-06	0.0092451	0.569	0.532	0.163372
Nr3c1	8.57746e-06	0.0539596	0.611	0.563	0.163924
Timm23	8.65416e-06	0.00374291	0.467	0.436	0.16539
Arid1a	8.67446e-06	0.0627161	0.342	0.296	0.165778
Mrps24	8.77216e-06	0.0130919	0.334	0.301	0.167645
Zfp428	8.78417e-06	0.0556719	0.252	0.211	0.167874
Josd2	8.8043e-06	0.033507	0.149	0.12	0.168259
Psmb6	8.88145e-06	0.0706219	0.413	0.366	0.169733
Mcrip1	8.96684e-06	0.0531451	0.25	0.209	0.171365
5330438D12Rik	8.9987e-06	0.0373614	0.259	0.222	0.171974
Ptpa	9.02971e-06	0.0342874	0.232	0.198	0.172567
Sec61g	9.04832e-06	-0.029629	0.555	0.536	0.172922
Atf7	9.06479e-06	0.0598074	0.57	0.521	0.173237
Rnh1	9.11958e-06	0.0496643	0.289	0.247	0.174284
Ifnar2	9.17288e-06	0.0478816	0.243	0.205	0.175303
Lsm10	9.2051e-06	0.0495476	0.121	0.091	0.175919
Impa1	9.22909e-06	0.0462287	0.293	0.252	0.176377
Eif4enif1	9.26506e-06	0.0388205	0.141	0.111	0.177065
Mafg	9.36788e-06	0.0575435	0.203	0.166	0.17903
Rtcb	9.37926e-06	0.0251871	0.185	0.156	0.179247
Map3k2	9.4102e-06	0.0646905	0.309	0.266	0.179838
Clip3	9.43389e-06	0.0153316	0.277	0.248	0.180291
Nudt16l1	9.43935e-06	0.0436729	0.147	0.114	0.180395
Ggt7	9.45329e-06	0.0541089	0.192	0.155	0.180662
Cox7c	9.45802e-06	-0.088435	0.89	0.889	0.180752
Lonrf3	9.49841e-06	0.0316972	0.281	0.245	0.181524
Atp6v1d	9.52981e-06	0.0557221	0.316	0.273	0.182124
Ccdc127	9.54906e-06	0.0535353	0.254	0.213	0.182492
Lrp6	9.62678e-06	0.0256735	0.307	0.272	0.183977
Emc9	9.63144e-06	0.0419073	0.203	0.168	0.184066
Nsmce4a	9.66731e-06	0.0418292	0.163	0.13	0.184752
Usp45	9.71131e-06	0.0474132	0.239	0.2	0.185593
Magi3	9.71232e-06	0.0130406	0.561	0.522	0.185612
Abat	9.72275e-06	-0.0447115	0.46	0.456	0.185811
Ppara	9.82687e-06	0.0583847	0.273	0.231	0.187801
Kbtbd3	9.83179e-06	0.0347445	0.138	0.108	0.187895
Gnl2	9.83891e-06	0.0140379	0.16	0.139	0.188031
Rps6kc1	9.8766e-06	0.0384531	0.151	0.12	0.188752
Eif4e2	9.93291e-06	0.0437456	0.204	0.168	0.189828
Rnf113a2	9.95979e-06	0.0360752	0.113	0.085	0.190342
Npdc1	9.98896e-06	-0.00371241	0.244	0.228	0.190899
Timm8a1	1.00398e-05	0.0458483	0.172	0.138	0.191871
Dhrs1	1.00402e-05	-0.00914398	0.287	0.268	0.191878
Cct3	1.00762e-05	0.052947	0.344	0.3	0.192567
Zfp955b	1.01122e-05	0.0438178	0.153	0.121	0.193254
Armc1	1.01178e-05	0.0200465	0.243	0.213	0.193362
Zfyve21	1.01306e-05	0.052073	0.425	0.379	0.193606
Dhrs3	1.01904e-05	0.0662756	0.391	0.344	0.194749
Ssbp3	1.01975e-05	0.026723	0.196	0.167	0.194885
Rgs5	1.02379e-05	0.0236682	0.036	0.02	0.195657
Epha4	1.02551e-05	0.0260833	0.199	0.17	0.195986
Fcrla	1.0299e-05	0.0200487	0.056	0.039	0.196823
Cnot4	1.03055e-05	0.032587	0.609	0.565	0.196948
Txlna	1.03134e-05	0.0355349	0.158	0.127	0.197099
Cntn1	1.03701e-05	0.0385984	0.581	0.536	0.198182
Rhobtb2	1.0382e-05	0.0388576	0.173	0.14	0.198411
Gak	1.04143e-05	0.00448101	0.196	0.177	0.199028
Slc7a6os	1.04775e-05	0.0304552	0.085	0.061	0.200236
Tmem186	1.05213e-05	0.0377979	0.095	0.069	0.201073
Eif2s1	1.0523e-05	0.0391327	0.221	0.186	0.201104
Lin7c	1.05437e-05	0.0287063	0.285	0.25	0.201501
Arl5b	1.05636e-05	0.0422784	0.144	0.112	0.201881
Rpain	1.06627e-05	0.0158003	0.123	0.102	0.203775
Atg4d	1.07174e-05	0.0401435	0.099	0.072	0.20482
Snhg9	1.07607e-05	0.0551246	0.172	0.138	0.205648
Rgs19	1.07677e-05	0.0123502	0.027	0.016	0.205782
Med12	1.08026e-05	0.0221067	0.137	0.113	0.206448
Plcl1	1.09418e-05	0.0911105	0.576	0.529	0.209108
Nt5dc3	1.09647e-05	0.0400984	0.229	0.192	0.209546
Prdx2	1.09688e-05	-0.0594957	0.722	0.716	0.209624
Akap9	1.09814e-05	0.0655508	0.57	0.523	0.209866
Bin1	1.09927e-05	0.0368012	0.132	0.104	0.210081
E2f6	1.10432e-05	0.040216	0.137	0.106	0.211047
Herpud1	1.10623e-05	0.0548066	0.268	0.227	0.211411
Sf3a3	1.11041e-05	0.0427919	0.137	0.106	0.212211
Brd1	1.11303e-05	0.0353631	0.307	0.269	0.212711
Atrip	1.1153e-05	0.0290439	0.101	0.077	0.213145
Kdm1a	1.11794e-05	0.0298016	0.291	0.256	0.21365
Gpi1	1.11995e-05	0.0484804	0.653	0.607	0.214033
Ipo9	1.12826e-05	0.0275828	0.129	0.104	0.215622
Qrich1	1.13038e-05	0.0480966	0.222	0.185	0.216027
Glrx	1.13922e-05	0.0347748	0.099	0.073	0.217717
Tpp2	1.14148e-05	0.0494173	0.277	0.236	0.218148
Mat2b	1.14697e-05	0.0423076	0.237	0.2	0.219197
Pcdh17	1.14776e-05	0.0349872	0.613	0.569	0.219349
Pip4p2	1.1501e-05	0.0478731	0.371	0.327	0.219796
Sbk1	1.15305e-05	0.0350609	0.118	0.09	0.220358
Rdh14	1.16215e-05	0.0547977	0.222	0.183	0.222099
Mical2	1.16367e-05	0.0570156	0.662	0.617	0.222388
Stt3b	1.16504e-05	0.0296551	0.416	0.377	0.22265
Zfp654	1.16614e-05	0.0436784	0.216	0.18	0.222861
Golph3	1.16645e-05	0.0488543	0.265	0.225	0.22292
Hadha	1.1682e-05	0.0103208	0.502	0.468	0.223255
Laptm5	1.17483e-05	0.0336762	0.04	0.023	0.224522
Nfe2l2	1.18021e-05	0.038816	0.393	0.352	0.22555
Urm1	1.18042e-05	0.0235677	0.149	0.124	0.225591
Tnpo1	1.18215e-05	0.0438018	0.361	0.319	0.22592
Hspd1	1.18476e-05	0.0544523	0.349	0.307	0.226419
Cdc37l1	1.18512e-05	0.0116621	0.533	0.499	0.226489
Prnp	1.18973e-05	-0.0792436	0.985	0.988	0.227369
Trp53i13	1.19531e-05	0.0380665	0.195	0.162	0.228435
Nrros	1.20001e-05	0.054301	0.209	0.171	0.229333
Erg28	1.20116e-05	0.0394522	0.355	0.315	0.229553
Cuedc2	1.20727e-05	0.0255579	0.271	0.239	0.230722
Spry4	1.21169e-05	0.0345904	0.093	0.068	0.231567
Gtf2f1	1.21238e-05	0.0310024	0.173	0.143	0.231697
Mrpl45	1.21337e-05	0.0568994	0.185	0.149	0.231888
Kif3b	1.21473e-05	0.0378024	0.127	0.099	0.232147
Fem1c	1.21946e-05	0.0264746	0.139	0.114	0.233051
Sacm1l	1.22202e-05	0.0583235	0.324	0.28	0.233541
Pdk2	1.22563e-05	0.0447513	0.321	0.28	0.23423
Nxn	1.2279e-05	0.0701846	0.561	0.514	0.234665
Trip10	1.2285e-05	0.0319625	0.05	0.034	0.234779
Mul1	1.23504e-05	0.0300706	0.149	0.121	0.236028
Gm11417	1.23744e-05	0.0308491	0.068	0.046	0.236488
Taf12	1.2403e-05	0.0464945	0.15	0.118	0.237035
Lrch3	1.24211e-05	-0.00116589	0.432	0.406	0.23738
Zfp868	1.24333e-05	0.0248825	0.088	0.067	0.237612
Nip7	1.25123e-05	0.0671561	0.158	0.126	0.239123
Crtc3	1.25511e-05	0.00442319	0.544	0.513	0.239864
Mvk	1.25788e-05	0.0488075	0.162	0.128	0.240394
Ncoa5	1.26668e-05	0.0401509	0.197	0.162	0.242075
Atp6v1f	1.26791e-05	-0.0145676	0.514	0.486	0.24231
Mtrf1l	1.27158e-05	0.0339521	0.102	0.075	0.243013
Alkbh5	1.27268e-05	0.0351163	0.213	0.179	0.243223
Gm973	1.27582e-05	-0.0689122	0.482	0.498	0.243822
Rce1	1.2764e-05	0.0382565	0.107	0.079	0.243933
Pop5	1.27693e-05	0.0434041	0.196	0.161	0.244034
Hk1	1.28096e-05	0.0244067	0.326	0.292	0.244804
Fam20a	1.28144e-05	0.0724101	0.765	0.725	0.244896
Rragc	1.294e-05	0.0287053	0.149	0.122	0.247296
Ythdf1	1.30349e-05	0.0493171	0.153	0.121	0.24911
Glrx2	1.30352e-05	0.0472004	0.393	0.349	0.249116
Spry2	1.31056e-05	0.0115811	0.583	0.544	0.250462
Gpr19	1.31537e-05	0.0361165	0.285	0.248	0.251381
Prdx5	1.32192e-05	0.00956272	0.534	0.501	0.252632
Tac1	1.32567e-05	-0.0115618	0.002	0.008	0.253348
Mccc1	1.32953e-05	0.0323653	0.197	0.166	0.254086
Dipk1b	1.33591e-05	0.0341439	0.165	0.135	0.255306
Tle4	1.33899e-05	0.0785387	0.829	0.796	0.255894
Nosip	1.34052e-05	0.0417769	0.142	0.111	0.256188
Srprb	1.34463e-05	0.0363484	0.159	0.128	0.256973
Ehmt1	1.34496e-05	0.0382089	0.354	0.314	0.257035
Mrpl4	1.34652e-05	0.0485895	0.218	0.181	0.257333
Tcf7l2	1.34937e-05	0.0580945	0.804	0.765	0.257877
Mapk6	1.35074e-05	0.0403837	0.205	0.17	0.25814
Zkscan8	1.35162e-05	0.0378547	0.102	0.075	0.258308
Ip6k2	1.36543e-05	0.0215023	0.229	0.201	0.260947
Tomm5	1.37062e-05	0.0542519	0.312	0.27	0.261939
Zdhhc5	1.37614e-05	0.0469299	0.133	0.102	0.262994
Brip1os	1.38514e-05	0.037612	0.141	0.111	0.264713
Slc38a2	1.39538e-05	0.0425586	0.116	0.088	0.26667
Tsc22d1	1.39611e-05	0.047552	0.508	0.462	0.266811
Ankrd17	1.40443e-05	0.0384868	0.525	0.481	0.268401
Bola1	1.40767e-05	0.0585057	0.213	0.175	0.26902
Ppp4r1	1.40924e-05	0.035106	0.194	0.161	0.269321
Rps6	1.40973e-05	0.0354373	0.526	0.484	0.269413
Slc35b3	1.41079e-05	0.034608	0.1	0.074	0.269617
Dnaja1	1.41171e-05	0.0609869	0.65	0.604	0.269792
Acadvl	1.4163e-05	0.0213897	0.244	0.214	0.27067
Rabep2	1.41795e-05	0.0301418	0.078	0.055	0.270985
Lyst	1.42037e-05	0.0383035	0.262	0.225	0.271446
Fgf13	1.42852e-05	0.113938	0.643	0.606	0.273005
Ndufs2	1.43139e-05	0.0380964	0.364	0.324	0.273552
Ncoa6	1.43225e-05	0.0550304	0.291	0.249	0.273718
Spi1	1.4344e-05	0.0117185	0.011	0.003	0.274129
Dock9	1.43789e-05	0.0569479	0.232	0.193	0.274795
Phkg2	1.44454e-05	0.020167	0.15	0.126	0.276066
Schip1	1.45051e-05	0.0157756	0.254	0.226	0.277208
Socs5	1.45213e-05	0.047001	0.153	0.121	0.277517
Mkln1	1.4526e-05	-0.0444634	0.671	0.659	0.277606
Trappc8	1.45526e-05	0.0464658	0.274	0.234	0.278116
Diaph2	1.45533e-05	0.0447102	0.62	0.574	0.278128
Efl1	1.45565e-05	0.0478984	0.165	0.131	0.278189
Ube2z	1.45711e-05	0.0438216	0.106	0.079	0.278469
Dclk2	1.46179e-05	0.0510221	0.338	0.295	0.279363
Cldn10	1.46279e-05	-0.110509	0.955	0.959	0.279554
Ppme1	1.46836e-05	0.0394939	0.3	0.261	0.280618
Mif4gd	1.47104e-05	0.0544751	0.182	0.147	0.281131
Mgrn1	1.47468e-05	0.0231391	0.212	0.183	0.281827
Osbpl9	1.47603e-05	0.0544751	0.75	0.708	0.282084
Sgf29	1.47757e-05	0.035235	0.08	0.056	0.282378
Kctd6	1.47771e-05	0.0295775	0.175	0.146	0.282406
Ran	1.48014e-05	0.0711593	0.355	0.31	0.28287
Zfp706	1.48256e-05	0.0693847	0.358	0.313	0.283331
Psph	1.48982e-05	-0.0407206	0.43	0.421	0.28472
Btg1	1.49782e-05	0.0522883	0.577	0.53	0.286249
Ecsit	1.51734e-05	0.0508644	0.168	0.134	0.28998
Sept11	1.51881e-05	0.0507476	0.211	0.174	0.29026
Tmx4	1.5191e-05	0.0378913	0.278	0.241	0.290315
Abl2	1.5194e-05	0.023892	0.317	0.283	0.290373
Psme2	1.52426e-05	0.0431025	0.158	0.125	0.291301
Letm2	1.53307e-05	0.031219	0.208	0.177	0.292984
Fam20c	1.53432e-05	0.0399946	0.118	0.089	0.293224
Mtpap	1.53619e-05	0.0471144	0.184	0.149	0.29358
Tbc1d17	1.53797e-05	0.035365	0.11	0.084	0.293921
Retreg3	1.53958e-05	0.0322511	0.132	0.105	0.294228
Ccdc88a	1.54062e-05	0.0655498	0.937	0.919	0.294429
Capns1	1.54128e-05	0.0498752	0.246	0.207	0.294554
Fdx1	1.54439e-05	0.0500691	0.27	0.23	0.295149
Inpp5a	1.54444e-05	0.0433889	0.167	0.133	0.295157
Tnrc6a	1.55655e-05	0.00117927	0.83	0.798	0.297472
Ywhaq	1.55698e-05	-0.0445534	0.43	0.425	0.297555
Rbm26	1.55983e-05	0.0208017	0.667	0.628	0.2981
Clta	1.56462e-05	0.036152	0.465	0.425	0.299015
Smarcad1	1.56594e-05	0.0514362	0.252	0.212	0.299267
Klhl29	1.56667e-05	0.0513438	0.129	0.099	0.299406
Psmc1	1.56964e-05	0.0530137	0.27	0.23	0.299975
Txndc9	1.57268e-05	0.0266581	0.344	0.307	0.300556
Eno1	1.5941e-05	-0.0652388	0.774	0.767	0.304649
Kif2a	1.59696e-05	0.0626046	0.297	0.255	0.305196
Ston2	1.59993e-05	0.0281807	0.477	0.438	0.305763
2900052N01Rik	1.60027e-05	-0.0876623	0.481	0.495	0.305827
Sigmar1	1.60627e-05	0.0501109	0.225	0.187	0.306974
Ier2	1.60732e-05	0.0149736	0.034	0.021	0.307175
Eif4a2	1.60871e-05	0.0346583	0.514	0.471	0.30744
Adam22	1.61321e-05	0.0125543	0.182	0.159	0.308301
Dop1b	1.6144e-05	0.0517818	0.292	0.251	0.308529
Kif16b	1.61493e-05	0.0518562	0.225	0.187	0.308629
Foxk2	1.61507e-05	0.0422905	0.196	0.161	0.308657
Rnf135	1.61917e-05	0.0299847	0.06	0.04	0.30944
Srsf6	1.6291e-05	0.0484765	0.228	0.19	0.311337
Rpl22l1	1.63981e-05	-0.0520779	0.551	0.542	0.313383
Chchd1	1.64794e-05	-0.00149858	0.325	0.3	0.314937
Cndp2	1.6483e-05	0.0436705	0.115	0.086	0.315007
Rfxank	1.64837e-05	0.0226038	0.112	0.09	0.315019
Kdm5b	1.6492e-05	0.0111777	0.583	0.546	0.315178
Gm48163	1.65186e-05	0.0299114	0.055	0.035	0.315686
Fam120a	1.65342e-05	0.0200898	0.294	0.265	0.315985
Nrarp	1.66279e-05	0.00676416	0.34	0.312	0.317775
Prcc	1.67293e-05	0.0154683	0.113	0.094	0.319713
Wdr91	1.67455e-05	0.0304345	0.138	0.111	0.320023
Coa6	1.67654e-05	0.0318993	0.162	0.132	0.320404
Gfod2	1.68716e-05	0.0620353	0.124	0.094	0.322433
Lair1	1.69475e-05	0.0142113	0.128	0.107	0.323883
AA465934	1.70893e-05	-0.0273375	0.045	0.057	0.326594
Phf6	1.71856e-05	0.0417852	0.181	0.148	0.328434
Ppil6	1.72632e-05	0.0520722	0.233	0.194	0.329918
Ptcd2	1.73684e-05	0.0305266	0.149	0.121	0.331927
Snhg20	1.73892e-05	0.0496078	0.37	0.327	0.332325
Polb	1.74577e-05	0.0357808	0.311	0.273	0.333634
Top1	1.74817e-05	0.0343166	0.664	0.622	0.334094
Pdcd4	1.75696e-05	0.00759383	0.532	0.497	0.335773
Pik3ca	1.76211e-05	0.0348064	0.292	0.256	0.336756
Eif1b	1.763e-05	0.0199587	0.67	0.63	0.336928
Slc30a10	1.76546e-05	0.0450888	0.353	0.312	0.337397
Impdh2	1.7666e-05	0.0479384	0.143	0.112	0.337615
Dimt1	1.77286e-05	0.0406993	0.106	0.078	0.338811
Car2	1.77801e-05	0.0244558	0.863	0.829	0.339795
Apoo	1.78013e-05	0.0328587	0.27	0.236	0.340201
Rtn4	1.78651e-05	0.0409007	0.557	0.514	0.341419
Cops9	1.80551e-05	-0.0637883	0.456	0.463	0.345051
Cdc34	1.80646e-05	0.0249369	0.102	0.08	0.345232
Pcdh11x	1.8077e-05	0.0202557	0.429	0.392	0.34547
Acap3	1.81342e-05	0.0309484	0.084	0.061	0.346564
Jmjd6	1.81457e-05	0.0271752	0.119	0.094	0.346782
Esd	1.81551e-05	-0.00976927	0.282	0.263	0.346963
Hsf1	1.82154e-05	0.0353759	0.107	0.081	0.348115
Crk	1.82256e-05	0.0271934	0.22	0.189	0.34831
Cyth1	1.82346e-05	0.0619171	0.291	0.249	0.348481
Uqcr10	1.83882e-05	-0.081137	0.756	0.754	0.351418
Ino80	1.84221e-05	0.0448667	0.231	0.194	0.352064
Pkn1	1.84624e-05	0.0308224	0.133	0.107	0.352836
Zcchc14	1.84877e-05	0.0270793	0.157	0.13	0.353319
Ngrn	1.85224e-05	0.0387493	0.158	0.127	0.353982
Mrpl38	1.86077e-05	0.0479657	0.161	0.128	0.355612
Arpc1a	1.86759e-05	0.0614734	0.281	0.24	0.356916
Rab5a	1.86985e-05	0.0162181	0.397	0.362	0.357347
Zfand3	1.87193e-05	0.0500387	0.6	0.554	0.357744
Got2	1.88843e-05	0.0461408	0.149	0.117	0.360898
Chst11	1.89033e-05	0.0231732	0.31	0.277	0.361262
Taco1	1.89701e-05	0.0251588	0.112	0.088	0.362537
C030005K06Rik	1.90029e-05	0.06533	0.351	0.307	0.363164
Nipsnap2	1.90166e-05	0.0199327	0.276	0.245	0.363426
Rhoa	1.90716e-05	-0.0384186	0.595	0.581	0.364478
Rps25	1.91035e-05	-0.0175979	0.701	0.674	0.365088
Znrf3	1.91748e-05	-0.0101479	0.725	0.695	0.366449
Rnf6	1.92756e-05	0.0346852	0.207	0.174	0.368376
Atp5mpl	1.92936e-05	-0.0774844	0.754	0.757	0.36872
Fam110b	1.9332e-05	0.0548902	0.306	0.264	0.369453
Mrpl24	1.9332e-05	0.0593424	0.258	0.218	0.369454
Atraid	1.94639e-05	0.0070346	0.622	0.588	0.371975
Pla2g3	1.95131e-05	0.0254013	0.034	0.02	0.372914
Zfp112	1.96038e-05	0.0312162	0.066	0.044	0.374648
Pycrl	1.96282e-05	0.0455554	0.151	0.119	0.375115
Api5	1.96651e-05	0.039268	0.233	0.198	0.37582
Sla	1.98027e-05	0.00998699	0.007	0.001	0.378449
Rack1	1.99087e-05	0.0682523	0.42	0.374	0.380475
Dhcr24	1.99225e-05	0.0381269	0.233	0.199	0.380739
Psmd4	1.99779e-05	0.0252138	0.365	0.331	0.381799
Smim12	2.00472e-05	0.0433868	0.158	0.126	0.383122
Elovl1	2.00863e-05	0.0361033	0.102	0.076	0.383869
4932438H23Rik	2.01061e-05	0.0460605	0.12	0.091	0.384248
Shisa9	2.01221e-05	0.0289437	0.258	0.224	0.384554
Atxn7l3b	2.01408e-05	0.0511529	0.615	0.569	0.384911
Pdcd2	2.01436e-05	0.0340466	0.083	0.06	0.384964
S100a6	2.03408e-05	-0.0608195	0.35	0.35	0.388733
Arl15	2.04229e-05	0.0501555	0.264	0.226	0.390303
Hdac1	2.04585e-05	0.0491765	0.173	0.139	0.390982
Zfp788	2.04588e-05	0.0378455	0.16	0.129	0.390987
Sorl1	2.05292e-05	0.0387525	0.353	0.316	0.392333
Fbxo7	2.05764e-05	0.0338156	0.178	0.147	0.393236
Fndc3b	2.06398e-05	0.0621256	0.317	0.274	0.394447
Prpf38b	2.06752e-05	0.0338674	0.235	0.201	0.395124
Tor1b	2.07397e-05	0.0406727	0.144	0.114	0.396356
Bcas2	2.10699e-05	0.0288619	0.281	0.247	0.402667
Capn11	2.11159e-05	0.0219692	0.031	0.018	0.403546
Mterf2	2.11352e-05	0.036588	0.117	0.089	0.403915
Stard5	2.12407e-05	0.0284804	0.111	0.087	0.405931
Nmnat1	2.12416e-05	0.0297432	0.082	0.06	0.405948
Ddx55	2.12909e-05	0.0423403	0.135	0.105	0.406891
Derl1	2.13734e-05	0.00767921	0.333	0.306	0.408466
Scaf8	2.13836e-05	0.0289227	0.378	0.341	0.408661
Ppp1r14b	2.1472e-05	0.0568613	0.397	0.353	0.410351
Aff4	2.15301e-05	-0.0110866	0.414	0.392	0.411463
Ddo	2.15561e-05	-0.0584245	0.289	0.3	0.411958
Gm4258	2.15946e-05	0.0678468	0.295	0.254	0.412695
Mrps17	2.16305e-05	0.0421901	0.279	0.241	0.41338
Rnf123	2.16699e-05	0.030036	0.106	0.08	0.414133
Ifngr1	2.17244e-05	0.0514286	0.237	0.198	0.415175
Mxi1	2.17253e-05	-0.0288768	0.6	0.586	0.415192
Grip1	2.18213e-05	0.0820897	0.312	0.27	0.417027
Rbm25	2.19052e-05	0.0340006	0.58	0.537	0.41863
Srgn	2.19117e-05	0.0229088	0.019	0.008	0.418754
Csnk2b	2.19729e-05	0.015704	0.308	0.277	0.419923
Gpkow	2.21139e-05	0.0327948	0.129	0.102	0.422619
Cisd2	2.2216e-05	0.0576209	0.304	0.262	0.42457
Akap8l	2.22192e-05	0.00859383	0.35	0.324	0.424632
Ptprg	2.22672e-05	0.0742619	0.705	0.663	0.425549
Bcas3	2.23106e-05	-0.00682458	0.444	0.418	0.426378
Acin1	2.23434e-05	0.0494286	0.385	0.342	0.427005
Csdc2	2.23687e-05	0.039222	0.385	0.344	0.427488
Gns	2.24688e-05	0.0519454	0.266	0.226	0.429401
Ndor1	2.25323e-05	0.0272145	0.078	0.057	0.430616
Azi2	2.25345e-05	0.0468037	0.17	0.137	0.430657
Mtfmt	2.26192e-05	0.0263848	0.073	0.052	0.432275
Pfkp	2.26421e-05	-0.0572903	0.565	0.564	0.432713
Bcl10	2.26607e-05	0.0562863	0.187	0.153	0.433069
Svil	2.26913e-05	0.0375386	0.179	0.147	0.433653
Fam49a	2.27123e-05	0.0499369	0.281	0.241	0.434056
Gid8	2.27656e-05	0.0408889	0.139	0.109	0.435073
Plagl2	2.29112e-05	0.0278519	0.052	0.033	0.437856
Ring1	2.29684e-05	0.0472956	0.191	0.156	0.438949
Inpp1	2.30609e-05	0.0439475	0.218	0.182	0.440717
Rbm10	2.30699e-05	0.0286476	0.169	0.141	0.440889
Narf	2.31088e-05	0.0468044	0.149	0.118	0.441633
Mob2	2.31648e-05	0.0388356	0.143	0.113	0.442702
Ccdc8	2.31816e-05	0.0259686	0.076	0.055	0.443023
Rpl34	2.32714e-05	-0.0126561	0.766	0.739	0.44474
E2f4	2.33446e-05	0.0338386	0.088	0.064	0.446138
Gm31614	2.35064e-05	-0.0400474	0.06	0.081	0.449231
Zim1	2.35311e-05	0.0334925	0.06	0.041	0.449703
Tmem237	2.37071e-05	0.04546	0.166	0.133	0.453066
Fmr1	2.37104e-05	0.0409411	0.278	0.241	0.45313
Fopnl	2.38007e-05	0.030253	0.223	0.191	0.454855
Golga5	2.39321e-05	0.0317729	0.181	0.152	0.457367
Tbl1x	2.40988e-05	0.0362668	0.509	0.467	0.460552
Ttyh3	2.41603e-05	0.0387992	0.767	0.726	0.461727
2410004B18Rik	2.42234e-05	0.00620196	0.171	0.151	0.462934
Washc3	2.43647e-05	0.0211366	0.229	0.202	0.465633
Aco1	2.45783e-05	0.041958	0.258	0.221	0.469716
Taz	2.46453e-05	0.0366208	0.197	0.165	0.470996
Epas1	2.46506e-05	-0.0366299	0.537	0.524	0.471098
Usp4	2.51606e-05	0.0387707	0.196	0.163	0.480844
Cotl1	2.51913e-05	0.0154438	0.315	0.285	0.48143
Atp5j2	2.53215e-05	-0.0779973	0.768	0.778	0.483919
Rab14	2.5531e-05	0.031014	0.694	0.652	0.487923
Ubl3	2.56065e-05	0.0458801	0.368	0.327	0.489367
Terf2	2.56871e-05	0.0338452	0.139	0.111	0.490907
Ube2d3	2.57098e-05	0.0292821	0.453	0.414	0.491341
Metap2	2.57336e-05	0.0498553	0.485	0.442	0.491796
Cr1l	2.57524e-05	0.0450136	0.272	0.233	0.492154
Srsf10	2.58675e-05	0.0231408	0.368	0.335	0.494354
Slc35d1	2.58791e-05	0.0501575	0.221	0.184	0.494576
Acp1	2.59089e-05	0.0494544	0.299	0.259	0.495144
Tmem101	2.59644e-05	0.0484701	0.151	0.119	0.496206
Snrk	2.59963e-05	0.0563277	0.31	0.268	0.496815
Metrnl	2.59984e-05	0.0430952	0.155	0.124	0.496856
Acadsb	2.60765e-05	0.0103239	0.333	0.305	0.498348
Tmbim1	2.6086e-05	0.0412657	0.222	0.187	0.49853
Clk2	2.61202e-05	0.047672	0.19	0.155	0.499184
Gadd45gip1	2.61457e-05	0.051629	0.286	0.246	0.49967
Ckap5	2.63374e-05	0.0182342	0.742	0.704	0.503335
Naa16	2.64616e-05	0.0228015	0.215	0.187	0.505708
Mlx	2.65099e-05	0.0423058	0.106	0.079	0.50663
Hectd1	2.65238e-05	0.0300135	0.368	0.331	0.506897
Tspan15	2.6604e-05	0.0279918	0.279	0.246	0.508429
U2af1	2.66356e-05	0.0538414	0.318	0.276	0.509032
Rdh13	2.66907e-05	0.022587	0.09	0.07	0.510086
Ciapin1	2.67028e-05	0.0462973	0.193	0.159	0.510317
Dlst	2.67133e-05	0.0303055	0.239	0.207	0.510519
Hspe1	2.67385e-05	0.0225608	0.678	0.639	0.510999
Tmem109	2.67408e-05	0.0356268	0.216	0.183	0.511043
Tmem115	2.67991e-05	0.0442501	0.159	0.127	0.512158
Nop58	2.68114e-05	0.0478481	0.151	0.119	0.512393
Sars	2.68267e-05	0.0528985	0.326	0.285	0.512685
Spaca6	2.69086e-05	0.0297267	0.201	0.171	0.514251
Exoc3	2.69311e-05	0.0438059	0.304	0.266	0.51468
Mtdh	2.69705e-05	0.0517493	0.759	0.718	0.515433
Snx33	2.72085e-05	0.0242621	0.071	0.051	0.519982
Phf20l1	2.73122e-05	-0.0247668	0.436	0.423	0.521963
Spag9	2.73456e-05	0.0251644	0.921	0.895	0.522601
Tnfaip6	2.75364e-05	0.0400769	0.099	0.073	0.526249
Mcu	2.7584e-05	0.0623169	0.556	0.51	0.527158
Jup	2.7644e-05	0.0367251	0.139	0.11	0.528304
Uqcc3	2.76577e-05	0.015518	0.225	0.2	0.528566
Kif21b	2.78785e-05	0.0384113	0.142	0.112	0.532786
Ppp5c	2.79114e-05	0.0466429	0.194	0.159	0.533414
Ppm1d	2.81355e-05	0.0378672	0.148	0.118	0.537698
Daam2	2.81994e-05	-0.00298129	0.77	0.737	0.538919
Tpd52l2	2.84972e-05	0.0480738	0.326	0.285	0.54461
Ptpn9	2.85207e-05	0.0378405	0.338	0.299	0.545059
Klhl2	2.85578e-05	0.0526787	0.225	0.188	0.545768
Nsmf	2.85797e-05	0.00521977	0.239	0.217	0.546186
Gfra1	2.86833e-05	-0.0343659	0.304	0.296	0.548166
Rpl8	2.87817e-05	0.0450836	0.739	0.698	0.550047
Ephb3	2.87839e-05	0.0414814	0.148	0.117	0.550089
Hipk2	2.89061e-05	0.0507501	0.749	0.708	0.552424
Cog4	2.89088e-05	0.0283824	0.187	0.159	0.552476
Gnpnat1	2.90617e-05	0.0317061	0.095	0.071	0.555398
Plcb4	2.91626e-05	0.0753912	0.527	0.481	0.557327
Galnt2	2.91995e-05	0.0435245	0.137	0.107	0.558032
Mfsd8	2.92225e-05	0.0394569	0.134	0.105	0.558471
Emsy	2.9406e-05	0.0439924	0.289	0.25	0.561978
Arl3	2.94426e-05	-0.0224007	0.531	0.51	0.562677
Sucla2	2.96545e-05	0.0166375	0.318	0.288	0.566727
Mmp28	2.96849e-05	0.0355425	0.099	0.073	0.567308
Resf1	2.96983e-05	0.0366002	0.183	0.152	0.567565
Pi4ka	2.97498e-05	0.0539996	0.367	0.324	0.568549
Zmat2	2.983e-05	0.00022709	0.287	0.266	0.57008
Utp11	2.98795e-05	0.0673859	0.251	0.214	0.571026
Rgl3	3.00523e-05	0.031279	0.076	0.053	0.57433
Cars2	3.02127e-05	0.0315196	0.071	0.049	0.577395
Araf	3.0236e-05	0.00644868	0.312	0.285	0.577841
Rbm22	3.03361e-05	0.0539117	0.217	0.18	0.579753
Kbtbd4	3.05156e-05	0.0299766	0.071	0.05	0.583183
Mrpl55	3.05292e-05	0.0318715	0.274	0.24	0.583444
Lgr4	3.06841e-05	-0.0194907	0.616	0.593	0.586403
Vps13c	3.07756e-05	0.0298488	0.298	0.263	0.588153
Tab1	3.0779e-05	0.0313466	0.131	0.105	0.588218
Soga3	3.07809e-05	0.0198745	0.459	0.424	0.588254
5930430L01Rik	3.08426e-05	0.00264803	0.108	0.096	0.589433
Tet3	3.09215e-05	0.0375629	0.206	0.173	0.590941
Sall1	3.10939e-05	0.0462505	0.164	0.131	0.594236
Gpx4	3.11224e-05	-0.0782312	0.732	0.743	0.594779
Rcn2	3.1192e-05	-0.0707904	0.745	0.75	0.59611
Ndufaf6	3.12149e-05	0.0443182	0.162	0.13	0.596548
Arhgap1	3.12857e-05	0.0290878	0.09	0.067	0.5979
Npepps	3.12987e-05	-0.0138528	0.584	0.562	0.598149
St3gal2	3.13111e-05	0.0213119	0.104	0.083	0.598386
Dleu2	3.13824e-05	0.0068745	0.381	0.352	0.59975
Stxbp3	3.15585e-05	0.0266664	0.402	0.364	0.603114
Gm5089	3.17114e-05	-0.0354112	0.524	0.516	0.606036
Zdhhc21	3.17214e-05	0.0454239	0.254	0.216	0.606228
A730020M07Rik	3.17421e-05	0.0246238	0.037	0.023	0.606623
Tufm	3.17487e-05	0.0340411	0.141	0.114	0.60675
Adcyap1r1	3.17779e-05	-0.0249907	0.346	0.335	0.607307
Ctsz	3.18685e-05	0.0706246	0.398	0.354	0.609038
Dand5	3.19678e-05	0.0336027	0.08	0.057	0.610938
Scamp5	3.20992e-05	0.0324866	0.195	0.165	0.613447
Mri1	3.21424e-05	0.0406336	0.109	0.083	0.614274
Prelid3b	3.21796e-05	0.0575907	0.192	0.158	0.614985
Xpot	3.21924e-05	0.058659	0.201	0.166	0.615228
Sh3glb1	3.2203e-05	0.0678899	0.62	0.576	0.615431
Timm17b	3.22445e-05	0.0385779	0.174	0.143	0.616225
Sbno1	3.23604e-05	0.0252988	0.314	0.28	0.61844
Pcyt1a	3.25363e-05	0.0262128	0.153	0.127	0.621801
Ccnh	3.27396e-05	0.0490786	0.326	0.286	0.625687
Pex6	3.27514e-05	0.0430994	0.162	0.13	0.625912
U2surp	3.28344e-05	-0.00201377	0.439	0.415	0.627499
Actr3b	3.30589e-05	0.0571351	0.31	0.269	0.631788
Gm47271	3.32728e-05	0.0229031	0.115	0.092	0.635876
Fastkd1	3.33454e-05	0.0351032	0.101	0.075	0.637264
Csnk1d	3.3399e-05	0.0206022	0.208	0.182	0.638289
Polr3c	3.34081e-05	0.0426152	0.115	0.088	0.638461
Pi4kb	3.35331e-05	0.0426698	0.163	0.131	0.640851
Nsun2	3.35568e-05	0.0387994	0.116	0.088	0.641303
Trim62	3.35574e-05	0.0335829	0.077	0.055	0.641316
Slc38a11	3.35818e-05	-0.00103567	0.001	0	0.641781
Gnaq	3.37345e-05	0.048756	0.772	0.732	0.6447
Tbl1xr1	3.39411e-05	-0.000343976	0.436	0.409	0.648649
Atp2b1	3.40813e-05	-0.0125412	0.332	0.316	0.651328
Nedd9	3.42162e-05	0.0249694	0.277	0.245	0.653905
Atp5f1	3.43182e-05	-0.036806	0.798	0.777	0.655855
Zfp606	3.43656e-05	0.0358691	0.145	0.116	0.656761
Fra10ac1	3.44245e-05	0.0477173	0.184	0.15	0.657887
Ech1	3.47265e-05	0.0341963	0.386	0.348	0.663659
Zfp74	3.47548e-05	0.0325397	0.131	0.104	0.664198
Hjurp	3.48109e-05	0.0487615	0.206	0.17	0.665271
Ppp1r3d	3.4832e-05	0.0470679	0.15	0.119	0.665674
Copa	3.49755e-05	0.0333626	0.283	0.249	0.668417
Tmem199	3.51801e-05	0.0341317	0.138	0.11	0.672326
Tmc1	3.52018e-05	6.1023e-05	0	0.001	0.672741
Rtn1	3.52144e-05	-0.0686841	0.215	0.243	0.672982
Eef1e1	3.523e-05	0.0392145	0.135	0.106	0.673281
Cryab	3.52626e-05	0.039634	0.364	0.325	0.673903
Ccdc86	3.52744e-05	0.0305459	0.076	0.054	0.674129
Pofut1	3.52964e-05	0.037312	0.124	0.096	0.67455
Ctdspl	3.53156e-05	0.0378153	0.364	0.324	0.674917
Tma7	3.5349e-05	-0.0524009	0.358	0.358	0.675555
Marcks	3.54143e-05	0.0652887	0.235	0.197	0.676802
Sirpa	3.54783e-05	0.0502606	0.604	0.56	0.678026
Tatdn1	3.55942e-05	0.0145012	0.163	0.142	0.680241
Pafah1b2	3.55949e-05	0.0176121	0.225	0.198	0.680254
Map2k4	3.56653e-05	0.0192641	0.234	0.208	0.6816
Ak6	3.56936e-05	0.046642	0.142	0.111	0.682141
Samm50	3.57825e-05	0.0145693	0.204	0.18	0.68384
Dhx30	3.58638e-05	0.0429293	0.283	0.246	0.685394
Mlf2	3.58804e-05	-0.0419808	0.516	0.513	0.68571
Rbm39	3.60178e-05	0.0366952	0.918	0.892	0.688336
Pou6f1	3.61156e-05	0.0455919	0.199	0.165	0.690206
Puf60	3.61832e-05	0.0358119	0.194	0.162	0.691498
Plcl2	3.61971e-05	0.0499675	0.103	0.078	0.691762
Dnajc21	3.62269e-05	0.0429207	0.118	0.09	0.692333
9530068E07Rik	3.6247e-05	0.0341639	0.126	0.099	0.692716
Elp4	3.6366e-05	0.0399479	0.515	0.472	0.694991
Tox4	3.6443e-05	0.036547	0.202	0.169	0.696461
Fjx1	3.64878e-05	0.0789881	0.9	0.876	0.697319
Camk2d	3.64916e-05	0.0208667	0.665	0.626	0.697391
Dcaf13	3.65407e-05	0.0376169	0.132	0.103	0.698329
Rab33b	3.65666e-05	0.0168583	0.159	0.136	0.698824
Tomm6	3.65938e-05	-0.0645149	0.379	0.384	0.699343
Fbxo22	3.66815e-05	0.046014	0.139	0.109	0.701021
Dctd	3.67544e-05	0.0380092	0.101	0.075	0.702413
Wrnip1	3.6783e-05	0.0372369	0.139	0.11	0.70296
Apip	3.6795e-05	0.0383678	0.187	0.155	0.70319
Sorcs2	3.6827e-05	0.0281745	0.492	0.453	0.703801
Aasdhppt	3.69407e-05	0.0432809	0.215	0.18	0.705973
Snrpd3	3.69579e-05	-0.016546	0.33	0.313	0.706302
Timmdc1	3.70157e-05	0.0439404	0.254	0.217	0.707408
Rnf103	3.71047e-05	0.0518813	0.181	0.147	0.709108
Cct8	3.71688e-05	0.0509701	0.292	0.253	0.710334
Sike1	3.72427e-05	0.0302965	0.178	0.149	0.711746
Rnf220	3.73543e-05	0.0374093	0.119	0.092	0.713878
Utp25	3.7409e-05	0.0235196	0.076	0.056	0.714924
Gm1976	3.7594e-05	-0.00623232	0.191	0.179	0.718459
Psmd7	3.77788e-05	0.0466726	0.356	0.314	0.72199
Ankrd29	3.80356e-05	0.0165099	0.353	0.322	0.726898
Pogz	3.8079e-05	0.0417572	0.2	0.166	0.727728
Gm11627	3.82033e-05	0.0239983	0.328	0.295	0.730103
Nxt1	3.84325e-05	0.036404	0.088	0.064	0.734483
Lcorl	3.84685e-05	0.071683	0.373	0.33	0.735171
Pnrc2	3.85065e-05	0.0273232	0.297	0.264	0.735898
Lemd2	3.85963e-05	0.0378063	0.142	0.112	0.737614
Eif1a	3.86697e-05	0.0338957	0.088	0.065	0.739017
Tlr4	3.86977e-05	0.030815	0.06	0.04	0.739551
Csde1	3.87699e-05	-0.0182398	0.369	0.357	0.740932
Ccdc115	3.94625e-05	0.0344856	0.09	0.066	0.754167
Phlda3	3.9467e-05	0.0292843	0.059	0.039	0.754254
Gtf2h3	3.9482e-05	0.0311059	0.062	0.042	0.75454
Atad3a	3.96887e-05	0.0289241	0.18	0.151	0.758491
Acbd3	3.98959e-05	0.0487834	0.242	0.205	0.76245
Gab1	3.99551e-05	0.0101695	0.316	0.289	0.763581
Mtmr6	4.00504e-05	0.00737196	0.157	0.14	0.765402
Strap	4.01047e-05	0.0496846	0.189	0.155	0.76644
Hcfc1	4.01531e-05	0.0207176	0.127	0.105	0.767365
Atic	4.01535e-05	0.0388409	0.151	0.121	0.767374
Trap1	4.02294e-05	0.0402376	0.178	0.146	0.768824
Scaf11	4.02567e-05	0.0231667	0.328	0.294	0.769346
Ndel1	4.02949e-05	0.026259	0.206	0.178	0.770077
Dnajc24	4.0393e-05	0.0107532	0.281	0.256	0.77195
Prdx3	4.04076e-05	-0.0265344	0.23	0.226	0.77223
Klhdc10	4.04182e-05	0.0355918	0.263	0.229	0.772433
Ikzf1	4.06141e-05	0.0108474	0.007	0.001	0.776176
Zcchc8	4.06454e-05	0.0219468	0.187	0.161	0.776774
Sparc	4.06638e-05	0.00209672	0.4	0.369	0.777125
Hivep2	4.07267e-05	0.0368231	0.605	0.563	0.778328
Ptpn18	4.07799e-05	0.0215859	0.019	0.009	0.779344
Zfp608	4.08069e-05	-0.0367903	0.524	0.512	0.779861
Cmc1	4.09381e-05	0.0434662	0.177	0.144	0.782368
Rnf11	4.10151e-05	0.0238826	0.261	0.23	0.783839
Crat	4.11367e-05	0.030087	0.155	0.128	0.786164
Syf2	4.119e-05	0.0244029	0.342	0.307	0.787183
Zfp346	4.13146e-05	0.0488621	0.157	0.126	0.789564
Anxa3	4.14171e-05	0.0162727	0.013	0.005	0.791523
Flii	4.14767e-05	0.0268717	0.174	0.146	0.79266
Fam181a	4.15576e-05	0.043817	0.158	0.126	0.794206
Cul2	4.15811e-05	0.0379132	0.219	0.185	0.794657
Qser1	4.16143e-05	0.0519005	0.188	0.155	0.795292
Calcoco1	4.16287e-05	0.0245439	0.141	0.117	0.795566
Gm26917	4.16596e-05	-0.113006	0.386	0.398	0.796156
Rhou	4.16856e-05	0.0100294	0.449	0.418	0.796654
Rab6a	4.17042e-05	0.00656604	0.36	0.333	0.797008
Mbd3	4.17322e-05	0.0351617	0.198	0.166	0.797543
Map4k5	4.17932e-05	0.0403119	0.268	0.231	0.798711
Glipr2	4.22355e-05	0.0417576	0.132	0.103	0.807163
Rab11a	4.24245e-05	0.0206131	0.269	0.238	0.810775
Col4a3bp	4.2466e-05	0.0430682	0.212	0.177	0.811568
Rnf14	4.27385e-05	0.0307863	0.274	0.24	0.816776
Tspyl4	4.28396e-05	0.0436791	0.216	0.182	0.818708
Ciao1	4.29393e-05	0.0435986	0.134	0.105	0.820613
Gpc1	4.29461e-05	0.0256145	0.041	0.028	0.820743
Dclre1b	4.29733e-05	0.0273681	0.046	0.029	0.821263
Zfp592	4.29961e-05	0.0445807	0.19	0.156	0.821698
Sar1a	4.32595e-05	-0.00229421	0.149	0.136	0.826732
Polr1c	4.33744e-05	0.0343855	0.103	0.078	0.828928
[truncated: 17,112 more rows]

## Sheet: DEG_Endothelial cells
SYMBOL	p_val_endo_Bx_Veh	avg_log2FC_endo_Bx_Veh	pct.1_endo_Bx_Veh	pct.2_endo_Bx_Veh	p_val_adj_endo_Bx_Veh
Hspb1	1.15681e-105	0.564988	0.968	0.894	2.70034e-101
Vwf	1.24439e-80	-0.86877	0.419	0.577	2.90477e-76
Hsp90ab1	5.81454e-58	0.300506	0.996	0.993	1.35729e-53
Hspa8	7.36616e-49	0.286498	0.987	0.971	1.71948e-44
Dnaja1	7.37523e-46	0.343415	0.889	0.792	1.7216e-41
Hbb-bs	5.49712e-40	-1.31289	0.111	0.254	1.28319e-35
Ttr	1.69555e-37	0.622433	0.52	0.376	3.95791e-33
Hes1	2.97384e-33	0.375136	0.53	0.378	6.94184e-29
Cdkn1a	2.06348e-32	0.317702	0.89	0.8	4.81678e-28
Acer2	2.78943e-31	-0.345556	0.741	0.807	6.51137e-27
Egr1	1.74277e-29	-0.37243	0.07	0.161	4.06815e-25
B2m	7.63462e-28	-0.258095	0.946	0.961	1.78215e-23
Cmss1	5.93511e-26	0.0960296	0.995	0.979	1.38543e-21
Rps11	8.07315e-26	-0.261444	0.961	0.977	1.88452e-21
Tpi1	1.871e-25	-0.259191	0.434	0.558	4.36748e-21
Malat1	2.71833e-25	0.22122	1	1	6.34539e-21
Tpt1	3.54012e-25	0.176503	1	1	8.26371e-21
Hba-a1	4.0742e-25	-0.976071	0.059	0.149	9.5104e-21
Frmd5	8.40328e-23	-0.372869	0.555	0.669	1.96158e-18
Ly6a	1.71817e-22	-0.229247	0.98	0.989	4.01073e-18
mt-Co1	1.97318e-22	-0.182652	1	1	4.60599e-18
Hsp90aa1	2.52938e-22	0.259276	0.783	0.685	5.90433e-18
Kdr	3.68222e-22	-0.252769	0.841	0.871	8.59541e-18
C1qb	4.91292e-22	0.17812	0.198	0.098	1.14682e-17
Tsc22d3	7.10707e-22	0.271628	0.82	0.746	1.659e-17
C1qa	1.26167e-21	0.197259	0.204	0.104	2.94511e-17
Hba-a2	1.30054e-21	-0.613111	0.03	0.096	3.03586e-17
Id3	1.04529e-20	0.230736	0.963	0.951	2.44002e-16
mt-Co3	2.61348e-20	-0.156791	1	1	6.10066e-16
Ccnd3	4.30164e-20	0.241711	0.673	0.581	1.00413e-15
Slc16a1	1.55061e-19	-0.33568	0.659	0.751	3.6196e-15
Fmo2	2.02891e-19	-0.346807	0.379	0.469	4.73607e-15
Zbtb16	3.59135e-19	0.205906	0.734	0.614	8.38328e-15
Sgk1	5.15525e-19	-0.24315	0.517	0.559	1.20339e-14
Pomc	5.63563e-19	-0.144343	0.075	0.156	1.31553e-14
Sox18	1.01533e-18	0.26322	0.719	0.627	2.37008e-14
Fth1	1.33861e-18	-0.253766	1	1	3.12472e-14
Hspa1a	2.95879e-18	0.345575	0.251	0.149	6.9067e-14
C1qc	4.35587e-18	0.134348	0.128	0.055	1.01679e-13
Cebpd	5.05817e-18	-0.292445	0.436	0.514	1.18073e-13
Ch25h	5.28021e-18	-0.13099	0.019	0.068	1.23256e-13
Dusp6	8.86608e-18	-0.225174	0.327	0.429	2.06961e-13
Btg2	9.64497e-18	-0.258917	0.603	0.642	2.25142e-13
Pkm	1.47455e-17	-0.215414	0.736	0.782	3.44204e-13
Cxcl12	1.49034e-17	-0.295935	0.972	0.967	3.4789e-13
Slc9a3r2	2.37119e-17	0.221133	0.904	0.852	5.53508e-13
mt-Atp6	2.97114e-17	-0.133746	1	1	6.93554e-13
Mxd4	6.05575e-17	0.20084	0.655	0.555	1.41359e-12
Ldha	9.51711e-17	-0.242227	0.704	0.751	2.22158e-12
Tbc1d4	1.03918e-16	0.240217	0.806	0.728	2.42576e-12
Hbb-bt	1.58444e-16	-0.32173	0.026	0.078	3.69855e-12
Rasgrp2	1.69974e-16	0.189494	0.431	0.322	3.9677e-12
Stmn1	2.53683e-16	0.237127	0.637	0.547	5.92172e-12
Aldoa	5.01677e-16	-0.20706	0.731	0.804	1.17106e-11
Sparcl1	1.21492e-15	-0.166666	0.987	0.994	2.83598e-11
Wnt5a	1.22607e-15	-0.203388	0.147	0.231	2.86202e-11
Fryl	1.82687e-15	-0.208406	0.652	0.727	4.26445e-11
Ctla2a	1.89455e-15	-0.312756	0.895	0.869	4.42245e-11
Pla2g4a	2.84355e-15	-0.206088	0.231	0.325	6.63769e-11
H2-K1	8.84837e-15	-0.22533	0.8	0.842	2.06547e-10
Rasal2	8.96036e-15	0.23563	0.867	0.823	2.09162e-10
Calm1	1.37855e-14	0.155474	0.997	0.993	3.21794e-10
Xist	1.49965e-14	-0.225715	0.454	0.47	3.50063e-10
Clec2d	1.59404e-14	-0.210026	0.811	0.848	3.72096e-10
Bnip3	1.6626e-14	-0.211365	0.41	0.483	3.881e-10
mt-Co2	1.78288e-14	-0.132988	1	1	4.16178e-10
Sorbs1	2.48129e-14	0.194491	0.912	0.867	5.79208e-10
Pmepa1	4.275e-14	0.184094	0.507	0.402	9.97913e-10
Adgrl3	4.28377e-14	-0.371619	0.492	0.548	9.99961e-10
Tuba1a	4.34624e-14	0.207101	0.75	0.661	1.01454e-09
Snap25	5.07594e-14	-0.140108	0.133	0.217	1.18488e-09
Rbm39	5.17634e-14	0.152679	0.944	0.929	1.20831e-09
Rhob	5.17885e-14	-0.204567	0.819	0.861	1.2089e-09
Adgre5	1.36675e-13	0.184164	0.706	0.639	3.19041e-09
Adamts9	1.5213e-13	-0.204562	0.107	0.183	3.55116e-09
Fos	1.71358e-13	-0.136064	0.086	0.156	4e-09
Slc2a1	1.9932e-13	0.153269	0.994	0.99	4.65272e-09
Mmp28	2.42238e-13	0.133496	0.237	0.151	5.65456e-09
Ly6e	3.00482e-13	-0.151824	0.983	0.989	7.01416e-09
Rnase4	3.229e-13	-0.186019	0.27	0.325	7.53746e-09
Cdk8	5.67943e-13	-0.00239475	0.955	0.907	1.32575e-08
Edn3	6.08036e-13	-0.163977	0.225	0.318	1.41934e-08
Tsc22d1	1.07394e-12	0.160003	0.992	0.986	2.5069e-08
Abca1	1.50416e-12	-0.180126	0.278	0.354	3.51116e-08
Nr4a1	1.64902e-12	-0.249298	0.184	0.258	3.8493e-08
Dusp1	1.84604e-12	-0.25181	0.551	0.613	4.3092e-08
Hspa12b	1.85995e-12	0.175001	0.672	0.583	4.34168e-08
Adm	1.96156e-12	-0.120441	0.129	0.205	4.57887e-08
P2ry12	2.23122e-12	0.0822954	0.078	0.031	5.20833e-08
Cpe	5.51727e-12	-0.21602	0.25	0.33	1.2879e-07
Apold1	5.55126e-12	-0.292826	0.674	0.729	1.29583e-07
Adgrl4	6.16312e-12	-0.169666	0.996	0.994	1.43866e-07
Cdk6	6.44828e-12	-0.153296	0.156	0.223	1.50522e-07
Pik3r3	9.82545e-12	-0.209593	0.427	0.506	2.29355e-07
Sptbn1	1.60164e-11	0.108338	0.999	0.999	3.73872e-07
Asap1	2.29112e-11	0.16801	0.661	0.583	5.34815e-07
Apbb2	3.45423e-11	-0.160063	0.79	0.82	8.0632e-07
Prnp	3.60394e-11	-0.178116	0.724	0.771	8.41269e-07
Gm42418	6.88815e-11	0.0293054	1	1	1.6079e-06
App	6.89611e-11	-0.125819	0.994	0.997	1.60976e-06
Ltbp4	8.11558e-11	-0.185828	0.743	0.795	1.89442e-06
Col4a1	8.65641e-11	-0.174772	0.831	0.852	2.02067e-06
Cacybp	8.74457e-11	0.15124	0.452	0.366	2.04125e-06
Rad54b	9.92075e-11	0.16375	0.32	0.236	2.3158e-06
N4bp3	1.12829e-10	0.130344	0.333	0.249	2.63376e-06
Ccn1	1.23705e-10	-0.218858	0.094	0.151	2.88766e-06
Ctss	1.24902e-10	0.088285	0.107	0.055	2.91559e-06
Jun	1.27223e-10	-0.225149	0.717	0.748	2.96978e-06
1810037I17Rik	1.50451e-10	-0.149975	0.865	0.875	3.51197e-06
Lyst	1.61499e-10	-0.147746	0.308	0.357	3.76987e-06
Spock2	1.61555e-10	0.150825	0.99	0.989	3.77117e-06
Tspan13	1.74478e-10	0.138579	0.952	0.93	4.07284e-06
Rgs12	1.89241e-10	0.16819	0.763	0.701	4.41745e-06
Cyp1b1	2.0314e-10	-0.0552151	0.017	0.049	4.74191e-06
H2-Eb1	2.62938e-10	-0.0327432	0.004	0.026	6.13777e-06
Gm10076	2.6729e-10	-0.152239	0.529	0.601	6.23935e-06
Gm9946	3.09158e-10	-0.193886	0.317	0.388	7.21667e-06
Bach2	4.01357e-10	0.164195	0.427	0.342	9.36887e-06
Pde7b	4.10732e-10	-0.201857	0.529	0.59	9.58773e-06
Rps15a	4.75649e-10	-0.14685	0.988	0.993	1.11031e-05
Crip2	5.87041e-10	0.125722	0.956	0.945	1.37033e-05
Cirbp	6.798e-10	-0.132049	0.276	0.347	1.58686e-05
Macf1	6.89783e-10	0.14125	0.973	0.958	1.61016e-05
Rpl22l1	8.96867e-10	-0.164215	0.657	0.697	2.09356e-05
Asb4	1.02583e-09	-0.183358	0.213	0.281	2.39459e-05
Smad6	1.08377e-09	-0.117701	0.228	0.309	2.52984e-05
Palmd	1.18735e-09	0.160072	0.9	0.873	2.77163e-05
Myl4	1.9127e-09	-0.0819601	0.066	0.114	4.46483e-05
Plk2	1.93091e-09	-0.176268	0.393	0.467	4.50731e-05
Jund	1.94315e-09	0.167425	0.826	0.776	4.53589e-05
Eif5	2.00278e-09	0.143052	0.654	0.59	4.6751e-05
Fau	2.25802e-09	-0.116897	1	0.999	5.2709e-05
Nes	2.26819e-09	0.167224	0.618	0.544	5.29463e-05
Penk	2.58021e-09	0.0063127	0.004	0.022	6.02297e-05
Hspa1b	2.73461e-09	0.188197	0.2	0.134	6.38339e-05
Fcrls	3.60359e-09	0.0615098	0.052	0.02	8.41185e-05
Ly6c1	3.7003e-09	-0.124106	0.999	1	8.6376e-05
Itga6	4.19875e-09	-0.156861	0.846	0.871	9.80113e-05
Sik1	4.31085e-09	-0.144851	0.554	0.609	0.000100628
Ier5	4.3412e-09	0.145441	0.438	0.358	0.000101337
Ephx1	5.06514e-09	0.140205	0.423	0.349	0.000118235
Tcim	5.08013e-09	-0.172238	0.215	0.28	0.000118586
Egfl7	6.23142e-09	0.135213	0.968	0.96	0.00014546
Rpl35	6.92635e-09	-0.115517	0.923	0.937	0.000161682
Ralbp1	7.14781e-09	0.14847	0.749	0.692	0.000166851
Nxn	7.28265e-09	-0.155628	0.633	0.664	0.000169999
Palm	7.90829e-09	0.150942	0.608	0.553	0.000184603
Chmp3	8.95424e-09	0.136414	0.681	0.605	0.000209019
Igkc	1.02682e-08	-0.0228642	0	0.012	0.000239692
Csnk1e	1.12404e-08	0.116861	0.365	0.284	0.000262385
Hdac9	1.2311e-08	-0.23152	0.46	0.517	0.000287376
Tnfsf10	1.34105e-08	-0.13822	0.468	0.55	0.000313041
Gpx4	1.36757e-08	-0.13943	0.896	0.917	0.000319232
Proser2	1.37501e-08	0.141183	0.444	0.365	0.000320969
Sema7a	1.48494e-08	0.132491	0.759	0.693	0.000346629
Airn	1.55777e-08	-0.149872	0.106	0.163	0.000363631
Klf10	1.59954e-08	0.108257	0.209	0.147	0.000373381
Car5a	1.8028e-08	0.146903	0.377	0.299	0.000420828
Pik3ip1	1.84297e-08	0.145472	0.507	0.441	0.000430205
Mt1	1.84305e-08	0.199405	0.812	0.798	0.000430224
Tprgl	1.87826e-08	0.131025	0.613	0.537	0.000438443
Tyrobp	1.90187e-08	0.0861448	0.103	0.057	0.000443954
Rpl26	1.91877e-08	-0.116348	0.993	0.994	0.000447897
Rbm3	2.05201e-08	-0.135322	0.659	0.716	0.000479
Stat3	2.07125e-08	-0.135198	0.407	0.467	0.000483491
Isyna1	2.20717e-08	0.135498	0.53	0.458	0.000515219
Fcgrt	2.27065e-08	0.128345	0.801	0.755	0.000530037
Plat	2.54886e-08	0.162442	0.793	0.746	0.00059498
Rpl11	2.68647e-08	-0.0981975	0.988	0.986	0.000627103
Gng11	2.75694e-08	-0.133523	0.92	0.942	0.000643552
Trem2	2.88353e-08	0.0638716	0.069	0.032	0.000673101
Slc6a6	2.90821e-08	-0.130385	0.961	0.973	0.000678864
Clic5	2.93285e-08	0.137351	0.863	0.831	0.000684615
Fn1	3.03406e-08	-0.181403	0.913	0.915	0.00070824
Gjc1	3.04344e-08	0.147054	0.662	0.612	0.00071043
Cav1	3.1517e-08	-0.147683	0.697	0.732	0.000735701
Sec14l1	3.9616e-08	0.141873	0.626	0.557	0.000924755
Fnbp1l	4.40169e-08	0.138711	0.815	0.766	0.00102749
Gapdh	4.99057e-08	-0.142902	0.77	0.786	0.00116495
Inka1	5.65771e-08	0.0815537	0.204	0.142	0.00132068
Timp3	5.81777e-08	0.194037	0.864	0.816	0.00135804
Bcam	6.04815e-08	0.135525	0.651	0.594	0.00141182
Tpst2	6.2166e-08	0.114696	0.331	0.264	0.00145114
Hspd1	6.39548e-08	0.117758	0.421	0.342	0.0014929
Ccl4	6.74455e-08	0.0420716	0.049	0.02	0.00157438
Sox17	6.74478e-08	0.169036	0.726	0.683	0.00157443
Lars2	6.76401e-08	0.0126323	0.797	0.73	0.00157892
Tuba1b	7.16024e-08	0.124749	0.733	0.669	0.00167141
Smc6	7.23675e-08	0.119141	0.48	0.4	0.00168927
Tcf15	7.36819e-08	0.0908024	0.183	0.124	0.00171996
Aif1	7.84451e-08	0.0367675	0.04	0.015	0.00183114
Selplg	8.49235e-08	0.0563388	0.047	0.018	0.00198237
Cdc42ep4	1.02496e-07	0.115311	0.365	0.292	0.00239256
Adamts1	1.07041e-07	-0.215011	0.329	0.372	0.00249866
Plcb4	1.0977e-07	-0.14834	0.807	0.836	0.00256236
Gm49417	1.14165e-07	0.136153	0.403	0.331	0.00266496
Emcn	1.15114e-07	0.124956	0.933	0.909	0.0026871
Fam107a	1.18066e-07	0.131229	0.366	0.297	0.00275601
Dab2ip	1.21069e-07	0.129103	0.779	0.731	0.00282611
Rflnb	1.24661e-07	-0.146342	0.382	0.436	0.00290997
Pglyrp1	1.33288e-07	0.150444	0.936	0.928	0.00311133
Ptgds	1.336e-07	0.000137404	0.257	0.19	0.00311862
Tmem204	1.37343e-07	0.132728	0.723	0.66	0.00320601
Gas6	1.51557e-07	-0.14007	0.446	0.508	0.00353781
Arpp21	1.67111e-07	-0.0408395	0.016	0.042	0.00390088
Rpl41	1.7089e-07	-0.0824341	0.999	0.998	0.00398908
Rpl38	1.87077e-07	-0.116001	0.999	0.998	0.00436694
AA465934	2.05458e-07	-0.0396211	0.017	0.044	0.00479601
Fndc1	2.15998e-07	-0.0265819	0.003	0.017	0.00504205
Zc3h6	2.1798e-07	-0.0859336	0.088	0.135	0.0050883
Rpl36al	2.269e-07	-0.126271	0.692	0.728	0.00529653
Pcp4l1	2.52804e-07	-0.133136	0.904	0.923	0.00590121
Klf6	3.15028e-07	-0.138038	0.805	0.837	0.00735369
Prpf4b	3.25467e-07	0.126674	0.612	0.542	0.00759739
Atp5l	3.3548e-07	-0.126302	0.844	0.873	0.0078311
Ablim1	3.35596e-07	0.107241	0.983	0.97	0.00783382
Mpp7	3.44967e-07	0.103008	0.223	0.162	0.00805256
Dnajc3	3.55856e-07	0.122497	0.586	0.511	0.00830676
Crem	3.57484e-07	0.124434	0.392	0.327	0.00834475
Scd2	3.60813e-07	-0.127691	0.309	0.361	0.00842246
Fgd5	3.82037e-07	0.130749	0.712	0.661	0.00891788
Calcrl	3.96069e-07	-0.135486	0.508	0.567	0.00924544
Ppp2r2d	4.02777e-07	0.128855	0.544	0.483	0.00940201
Ttll7	4.46988e-07	-0.142733	0.67	0.717	0.010434
Bst1	4.6819e-07	-0.0351515	0.006	0.022	0.010929
Dynll1	4.97893e-07	0.111474	0.943	0.922	0.0116223
Gatm	5.19398e-07	0.134843	0.752	0.727	0.0121243
Ywhah	5.19746e-07	0.132881	0.623	0.565	0.0121324
Rpl27	5.24236e-07	-0.0993031	0.967	0.977	0.0122372
Ptprb	5.25656e-07	-0.126863	0.982	0.986	0.0122704
Cttnbp2nl	6.58499e-07	0.126856	0.732	0.668	0.0153713
Bag1	7.35383e-07	0.114154	0.513	0.442	0.017166
Serinc3	7.37422e-07	0.111643	0.94	0.924	0.0172136
H2-Q7	7.55927e-07	-0.0998698	0.095	0.14	0.0176456
Fkbp4	8.17944e-07	0.0758878	0.462	0.391	0.0190933
Map3k6	8.75152e-07	0.0793381	0.167	0.115	0.0204287
Shld1	9.51409e-07	0.132945	0.443	0.38	0.0222087
Rpl10	9.56123e-07	-0.121733	0.949	0.958	0.0223188
Efna1	9.78645e-07	0.0799805	0.215	0.156	0.0228445
Cfh	1.04124e-06	-0.221378	0.271	0.329	0.0243057
Car4	1.19783e-06	0.192901	0.704	0.649	0.0279609
Igfbp7	1.21742e-06	-0.102227	0.984	0.985	0.0284183
Net1	1.25515e-06	0.181842	0.619	0.571	0.0292989
B4galt4	1.25537e-06	0.119779	0.582	0.527	0.0293041
Rgcc	1.28519e-06	0.165898	0.83	0.79	0.0300003
Gm16143	1.44526e-06	-0.0603129	0.042	0.076	0.0337367
Rpl34	1.44994e-06	-0.108945	0.991	0.994	0.033846
St13	1.48667e-06	0.124004	0.572	0.509	0.0347034
Tmem252	1.52852e-06	-0.168737	0.673	0.705	0.0356803
Ndrg1	1.5944e-06	-0.115997	0.906	0.895	0.037218
Chn2	1.62155e-06	-0.150829	0.682	0.708	0.037852
Dock9	1.62839e-06	0.119118	0.924	0.891	0.0380114
Dync1i2	1.63524e-06	0.120959	0.721	0.662	0.0381715
Stra6	1.72462e-06	0.139501	0.453	0.384	0.0402578
Vcam1	1.86688e-06	-0.154063	0.06	0.099	0.0435785
Dusp3	1.92007e-06	0.124922	0.676	0.618	0.0448202
Tiparp	1.93148e-06	-0.0958846	0.137	0.19	0.0450865
Klf13	1.96107e-06	0.121947	0.737	0.697	0.0457772
Dab2	2.09476e-06	-0.121732	0.401	0.453	0.0488979
Eif4h	2.39762e-06	0.106929	0.642	0.574	0.0559676
Hpcal1	2.57909e-06	0.109725	0.508	0.439	0.0602036
Eif1	2.58574e-06	0.078599	0.998	0.996	0.0603589
Ctla2b	2.60713e-06	0.120428	0.437	0.372	0.0608581
Zbtb38	2.8159e-06	0.12102	0.507	0.452	0.0657315
Lpcat3	2.8866e-06	-0.0762856	0.316	0.335	0.0673819
Gpr34	3.05862e-06	0.0479404	0.059	0.03	0.0713974
Mfsd2a	3.06628e-06	0.124477	0.634	0.613	0.0715763
Cnn3	3.15391e-06	0.0861268	0.432	0.362	0.0736218
Rpl39	3.32494e-06	-0.117105	0.981	0.987	0.0776141
Nfia	3.57709e-06	-0.128948	0.782	0.811	0.0835001
Hsph1	3.61445e-06	0.0799394	0.142	0.101	0.084372
Prr5l	3.75746e-06	-0.104693	0.232	0.293	0.0877104
Ppp1r13b	3.86712e-06	0.111328	0.637	0.572	0.0902702
St6galnac3	4.01631e-06	-0.148116	0.885	0.897	0.0937526
Gbp2	4.08753e-06	-0.0936519	0.306	0.373	0.0954153
Zfp366	4.0953e-06	0.156848	0.729	0.68	0.0955965
Gm12216	4.16459e-06	-0.0730443	0.1	0.146	0.0972141
Slc7a5	4.23066e-06	0.132989	0.849	0.814	0.0987563
Rnf152	4.44652e-06	-0.0770903	0.099	0.145	0.103795
Ptgs2	4.44656e-06	-0.0536941	0.023	0.047	0.103796
Hif1a	4.64795e-06	-0.11983	0.385	0.449	0.108497
Cadm1	4.77599e-06	-0.145439	0.452	0.483	0.111486
Ier3	4.78668e-06	0.184953	0.496	0.447	0.111736
Rpl30	5.06559e-06	-0.112536	0.995	0.997	0.118246
mt-Cytb	5.21255e-06	-0.0913216	1	1	0.121677
Rps6	5.3549e-06	-0.117674	0.967	0.969	0.125
Srsf3	5.56232e-06	0.106373	0.724	0.685	0.129841
Ccdc141	5.95563e-06	0.110898	0.95	0.93	0.139022
Rpl22	6.03924e-06	-0.0963284	0.961	0.96	0.140974
Rassf4	6.05145e-06	-0.070513	0.082	0.123	0.141259
Nudc	6.26602e-06	0.102967	0.509	0.443	0.146268
Uba52	6.28377e-06	-0.113032	0.541	0.583	0.146682
Scn2a	6.30598e-06	-0.0461497	0.028	0.055	0.1472
Sbds	6.71144e-06	0.110532	0.585	0.533	0.156665
Ptges3	6.89352e-06	0.110413	0.69	0.637	0.160915
Nat8f1	6.93792e-06	-0.0700216	0.095	0.134	0.161952
Fam133b	6.95922e-06	0.0948872	0.327	0.263	0.162449
Lamc3	7.20094e-06	0.0642239	0.108	0.069	0.168092
Vim	7.43471e-06	-0.104903	0.887	0.889	0.173548
Rpl37	7.5907e-06	-0.0977697	0.995	0.999	0.17719
Erap1	7.72083e-06	-0.0779065	0.214	0.273	0.180227
Rtn1	8.06441e-06	-0.0873834	0.089	0.131	0.188248
Tubb4b	8.68315e-06	0.11797	0.547	0.495	0.202691
Reck	8.97345e-06	-0.129008	0.476	0.526	0.209467
Cd59a	9.03731e-06	0.120793	0.702	0.673	0.210958
Anxa3	1.03029e-05	0.104909	0.857	0.817	0.240501
Gbp4	1.05872e-05	-0.0924004	0.17	0.221	0.247136
Lcp1	1.10251e-05	-0.0577256	0.048	0.081	0.257358
Rbp1	1.1531e-05	-0.126235	0.2	0.241	0.269167
Cacnb4	1.16215e-05	-0.0360487	0.016	0.038	0.271281
Samd12	1.19596e-05	-0.14121	0.634	0.683	0.279172
Nkd1	1.23424e-05	0.11238	0.498	0.434	0.288108
Ddx5	1.27066e-05	0.092308	0.943	0.932	0.296611
Adamts13	1.29192e-05	0.00473725	0.004	0	0.301573
Cd34	1.31459e-05	0.100707	0.91	0.881	0.306865
Zfp36	1.32039e-05	-0.122888	0.272	0.326	0.308219
AY036118	1.32428e-05	0.032239	0.985	0.969	0.309126
Adh1	1.32461e-05	-0.0372742	0.018	0.04	0.309205
Rps26	1.40355e-05	-0.109125	0.973	0.974	0.32763
Hnrnpf	1.41805e-05	0.0905486	0.828	0.79	0.331015
Rpl37a	1.4503e-05	-0.0862528	0.998	1	0.338543
Tshz3	1.4699e-05	0.0999994	0.281	0.224	0.343118
Bsg	1.51312e-05	-0.0673569	1	1	0.353208
Agmo	1.54671e-05	-0.120035	0.259	0.317	0.361049
Bbc3	1.55493e-05	0.0471137	0.08	0.047	0.362966
Gbp5	1.75055e-05	-0.111665	0.35	0.395	0.408632
Mylip	1.78095e-05	-0.0677019	0.126	0.173	0.415727
Ywhae	1.80411e-05	0.0958325	0.893	0.867	0.421133
Pim3	1.86813e-05	0.113364	0.588	0.534	0.436078
Hic1	2.12466e-05	0.0630203	0.118	0.081	0.495959
Degs2	2.13411e-05	0.105719	0.584	0.531	0.498165
Gab1	2.14204e-05	0.122818	0.502	0.448	0.500016
Syde2	2.18819e-05	0.00776919	0.006	0	0.510788
Tomm7	2.28111e-05	-0.0959486	0.764	0.788	0.53248
Rap1b	2.29602e-05	0.0962569	0.767	0.718	0.53596
S1pr1	2.38973e-05	0.100866	0.961	0.951	0.557835
Ehd4	2.42404e-05	0.102038	0.339	0.281	0.565843
Cct6a	2.49995e-05	0.104637	0.482	0.424	0.583563
Gltp	2.50801e-05	0.0965388	0.404	0.347	0.585444
Sfpq	2.6239e-05	0.112394	0.562	0.51	0.612496
Hells	2.65104e-05	-0.0532246	0.063	0.098	0.618833
H2-D1	2.66924e-05	-0.105724	0.914	0.92	0.623082
Rhoh	2.69621e-05	0.00810599	0.007	0.001	0.629376
Arhgdib	2.71823e-05	0.0898327	0.264	0.21	0.634517
Chst2	2.86274e-05	0.0267921	0.094	0.068	0.66825
Kank3	2.94498e-05	0.100825	0.848	0.816	0.687447
Dennd4c	2.98484e-05	-0.111556	0.358	0.415	0.696752
Eef1a1	3.08007e-05	-0.0980515	0.997	0.999	0.71898
Vil1	3.09769e-05	-0.0585911	0.078	0.113	0.723093
Rhoq	3.15936e-05	0.0873101	0.266	0.221	0.73749
Med13l	3.19132e-05	0.101908	0.434	0.385	0.74495
Ifi30	3.2956e-05	0.0268226	0.032	0.014	0.769291
Mturn	3.32351e-05	0.0695204	0.18	0.134	0.775808
Napb	3.36237e-05	-0.0559162	0.058	0.092	0.784879
Cox5a	3.36355e-05	-0.0987057	0.741	0.766	0.785153
Zfp951	3.46313e-05	-0.0511529	0.052	0.083	0.808399
Gm36595	3.47236e-05	-0.0159981	0.002	0.013	0.810552
Ndrg4	3.51453e-05	-0.0513885	0.043	0.073	0.820396
Rbms1	3.52232e-05	-0.084727	0.836	0.833	0.822215
Maz	3.53855e-05	0.0699804	0.195	0.147	0.826003
Psmb9	3.82932e-05	-0.0949854	0.328	0.384	0.893877
Als2cl	3.96731e-05	0.061719	0.121	0.084	0.92609
Gpc6	4.09801e-05	-0.11308	0.08	0.118	0.956599
0610005C13Rik	0.166661	0.00338516	0.002	0	1
0610006L08Rik	1	0	0	0	1
0610009B22Rik	0.00785964	-0.0457075	0.131	0.154	1
0610009E02Rik	0.955712	0.00247102	0.043	0.041	1
0610009L18Rik	0.160885	-0.00937708	0.033	0.042	1
0610010F05Rik	0.176106	0.0304817	0.2	0.188	1
0610010K14Rik	0.0701284	-0.0500619	0.371	0.401	1
0610012D04Rik	0.100503	0.00203054	0.001	0	1
0610012G03Rik	0.997974	0.00231359	0.393	0.393	1
0610025J13Rik	0.943003	-0.000495057	0.001	0.001	1
0610030E20Rik	0.0137594	0.04236	0.201	0.168	1
0610038B21Rik	0.562966	0.00238065	0.003	0.002	1
0610039K10Rik	0.19217	0.00693707	0.011	0.006	1
0610040B10Rik	0.0662385	-0.0213903	0.03	0.04	1
0610040F04Rik	0.928188	0.000109553	0.011	0.011	1
0610040J01Rik	0.348929	0.00492027	0.007	0.004	1
0610043K17Rik	0.134725	0.030594	0.12	0.106	1
0710001A04Rik	1	0	0	0	1
1010001B22Rik	0.569472	0.00545194	0.016	0.013	1
1010001N08Rik	0.100503	0.00203054	0.001	0	1
1100001I12Rik	1	0	0	0	1
1110002E22Rik	0.291196	-0.000673056	0	0	1
1110002J07Rik	0.89561	-0.0014672	0.004	0.005	1
1110002L01Rik	0.696248	-0.00856054	0.051	0.056	1
1110002O04Rik	0.291196	-0.000673056	0	0	1
1110004F10Rik	0.733035	0.00569409	0.482	0.473	1
1110006O24Rik	0.405355	-0.00462962	0.006	0.009	1
1110008P14Rik	0.0210656	-0.0444801	0.162	0.192	1
1110012L19Rik	0.456873	0.0151399	0.112	0.102	1
1110013H19Rik	0.946185	0.000696073	0.003	0.002	1
1110015O18Rik	0.291196	-0.000673056	0	0	1
1110017D15Rik	0.386145	-0.000948028	0.005	0.007	1
1110018N20Rik	0.999968	1.23091e-05	0.001	0.001	1
1110019B22Rik	1	0	0	0	1
1110019D14Rik	0.182717	-0.00241475	0.035	0.033	1
1110020A21Rik	0.995541	9.7516e-05	0.01	0.01	1
1110028F11Rik	1	0	0	0	1
1110032A03Rik	0.139605	-0.028947	0.126	0.142	1
1110032F04Rik	0.543604	-0.00216709	0.002	0.003	1
1110035H17Rik	0.730995	0.00516717	0.028	0.024	1
1110038B12Rik	0.660561	-0.00511197	0.061	0.065	1
1110038F14Rik	0.825445	0.0119732	0.294	0.286	1
1110046J04Rik	0.252706	-0.0131082	0.026	0.032	1
1110051M20Rik	0.214148	0.00356699	0.121	0.128	1
1110059E24Rik	0.510423	-0.0211284	0.232	0.246	1
1110059G10Rik	0.172063	-0.0309217	0.217	0.239	1
1110065P20Rik	0.595348	0.00427748	0.144	0.138	1
1190005I06Rik	0.882061	-0.00210611	0.006	0.007	1
1190007I07Rik	0.5696	-0.0115286	0.082	0.09	1
1200007C13Rik	1	0	0	0	1
1300002E11Rik	0.429637	-0.0216765	0.183	0.196	1
1300014J16Rik	0.529096	0.000554087	0.006	0.005	1
1300017J02Rik	0.420723	0.00259841	0.011	0.009	1
1500002C15Rik	0.709958	0.0020682	0.007	0.006	1
1500002F19Rik	0.890396	0.000684738	0.001	0.001	1
1500004A13Rik	0.0415878	-0.00416064	0.083	0.078	1
1500009C09Rik	0.605023	-0.00197297	0.004	0.005	1
1500009L16Rik	0.0850926	0.0114414	0.017	0.01	1
1500011B03Rik	0.764193	0.00337824	0.083	0.083	1
1500012K07Rik	1	0	0	0	1
1500015A07Rik	0.452182	0.00861447	0.029	0.025	1
1500015L24Rik	0.292421	1.23091e-05	0.001	0.001	1
1500026H17Rik	0.126464	-0.0142841	0.018	0.025	1
1500032F14Rik	0.561967	0.00135748	0.001	0	1
1500035N22Rik	0.693936	0.000121557	0.013	0.014	1
1520401A03Rik	1	0	0	0	1
1600002D24Rik	0.720124	0.00018942	0.002	0.002	1
1600002K03Rik	0.532707	0.00474561	0.043	0.042	1
1600010M07Rik	0.249723	0.0126382	0.083	0.08	1
1600012H06Rik	0.610426	0.0129924	0.114	0.106	1
1600014C10Rik	0.542104	0.00957509	0.059	0.052	1
1600014C23Rik	1	0	0	0	1
1600020E01Rik	0.979891	-0.00136284	0.152	0.154	1
1600022D10Rik	0.943003	-0.000495057	0.001	0.001	1
1700001C02Rik	0.408808	0.000507902	0	0	1
1700001C19Rik	0.707864	0.0003892	0.024	0.022	1
1700001D01Rik	0.561967	0.00135748	0.001	0	1
1700001G11Rik	0.388839	0.00356618	0.005	0.003	1
1700001J03Rik	0.847946	-0.000165154	0	0	1
1700001K19Rik	0.737203	-0.000330173	0.001	0	1
1700001K23Rik	0.560771	-0.00183897	0.001	0.002	1
1700001L05Rik	0.101232	0.00810787	0.008	0.004	1
1700001L19Rik	0.712611	-0.00198801	0.003	0.004	1
1700001O22Rik	0.631596	-0.00127525	0.007	0.007	1
1700001P01Rik	0.847946	-0.000165154	0	0	1
1700003D09Rik	1	0	0	0	1
1700003E16Rik	0.999968	1.23091e-05	0.001	0.001	1
1700003F12Rik	0.290268	-0.00432334	0.004	0.005	1
1700003G18Rik	0.371295	0.000354391	0.002	0.001	1
1700003I16Rik	1	0	0	0	1
1700003L19Rik	1	0	0	0	1
1700003M07Rik	0.100503	0.00152317	0.001	0	1
1700006F04Rik	1	0	0	0	1
1700006J14Rik	1	0	0	0	1
1700007F19Rik	1	0	0	0	1
1700007J10Rik	0.0991448	-0.00468593	0.001	0.005	1
1700007K13Rik	0.393734	0.00186467	0.002	0	1
1700007L15Rik	0.119169	-0.00793898	0.007	0.012	1
1700007P06Rik	1	0	0	0	1
1700008C04Rik	1	0	0	0	1
1700008J07Rik	0.0496719	0.00615653	0.031	0.024	1
1700008O03Rik	0.962092	-0.000330173	0.001	0.001	1
1700009J07Rik	1	0	0	0	1
1700010B13Rik	1	0	0	0	1
1700010I14Rik	0.0525309	0.00203054	0.001	0	1
1700010K23Rik	1	0	0	0	1
1700010K24Rik	0.0699761	0.0116051	0.019	0.011	1
1700010L04Rik	1	0	0	0	1
1700011D18Rik	0.408808	0.00101562	0	0	1
1700011L22Rik	0.847946	-0.000165154	0	0	1
1700012B07Rik	1	0	0	0	1
1700012B09Rik	0.627585	0.00186467	0.001	0	1
1700012C14Rik	0.418845	-0.000837896	0	0.001	1
1700012D14Rik	0.138075	0.0207878	0.058	0.051	1
1700012I11Rik	0.103998	-0.0013458	0	0.001	1
1700013F07Rik	0.747795	0.000684738	0.001	0.001	1
1700013H16Rik	0.514515	-0.0040887	0.008	0.01	1
1700013M08Rik	1	0	0	0	1
1700014D04Rik	1	0	0	0	1
1700015C15Rik	0.847946	-0.000165154	0	0	1
1700015F17Rik	0.847946	-0.000165154	0	0	1
1700015H07Rik	0.974204	-0.000482069	0.002	0.003	1
1700015O11Rik	1	0	0	0	1
1700016C15Rik	1	0	0	0	1
1700016D06Rik	0.238032	-0.00249466	0.002	0.004	1
1700016J18Rik	0.737203	0.000342569	0.001	0	1
1700016K05Rik	0.0201472	0.00909133	0.077	0.066	1
1700016K19Rik	0.621698	-0.00116717	0.001	0.001	1
1700016P03Rik	0.842571	-0.00257881	0.009	0.01	1
1700017B05Rik	0.0238513	0.0200976	0.033	0.021	1
1700017D01Rik	1	0	0	0	1
1700017J07Rik	1	0	0	0	1
1700017M07Rik	0.408808	0.000507902	0	0	1
1700018A04Rik	0.121693	-0.027567	0.3	0.303	1
1700018A23Rik	0.408808	0.000507902	0	0	1
1700018L02Rik	0.976136	0.000447786	0.013	0.012	1
1700019A02Rik	0.564364	-0.00265825	0.003	0.005	1
1700019D03Rik	0.31198	0.00355888	0.003	0.001	1
1700019G24Rik	0.440316	-0.00151032	0	0.001	1
1700019J19Rik	1	0	0	0	1
1700019L13Rik	0.820231	-0.00164548	0.004	0.005	1
1700019N19Rik	0.408808	0.000507902	0	0	1
1700020D05Rik	0.130126	-0.00285424	0	0.002	1
1700020D12Rik	1	0	0	0	1
1700020G17Rik	0.510195	-0.00167472	0.001	0.002	1
1700020L24Rik	0.744847	-0.00149591	0.002	0.003	1
1700020N01Rik	0.408808	0.000507902	0	0	1
1700021F05Rik	0.744447	-0.0070092	0.08	0.084	1
1700021F07Rik	1	0	0	0	1
1700021N21Rik	1	0	0	0	1
1700022A22Rik	0.962092	-0.000330173	0.001	0.001	1
1700022H01Rik	1	0	0	0	1
1700022I11Rik	0.633529	0.00256388	0.006	0.004	1
1700022N22Rik	0.761549	0.00103736	0.003	0.003	1
1700023F02Rik	0.291196	-0.000673056	0	0	1
1700023F06Rik	0.281427	0.00321889	0.003	0.001	1
1700023H06Rik	0.418845	-0.000837896	0	0.001	1
1700024B05Rik	1	0	0	0	1
1700024B18Rik	0.408808	0.000507902	0	0	1
1700024G13Rik	0.103998	-0.0013458	0	0.001	1
1700024I08Rik	1	0	0	0	1
1700025G04Rik	0.549941	0.00503517	0.027	0.023	1
1700025M24Rik	0.291196	-0.000673056	0	0	1
1700025N21Rik	0.847946	-0.000165154	0	0	1
1700025N23Rik	0.393734	0.00186467	0.002	0	1
1700026D11Rik	0.418845	-0.000837896	0	0.001	1
1700026F02Rik	0.291196	-0.000673056	0	0	1
1700026J12Rik	1	0	0	0	1
1700026J14Rik	0.103998	-0.0013458	0	0.001	1
1700026N04Rik	0.266475	0.00237168	0.002	0	1
1700027A07Rik	1	0	0	0	1
1700027A15Rik	1	0	0	0	1
1700027H10Rik	0.197442	0.00101562	0.001	0	1
1700027I24Rik	1	0	0	0	1
1700027J07Rik	1	0	0	0	1
1700028E10Rik	0.21175	0.00927377	0.023	0.018	1
1700028J19Rik	0.0327896	0.00222414	0.005	0.003	1
1700028K03Rik	0.489892	0.00356618	0.004	0.003	1
1700028N14Rik	1	0	0	0	1
1700028P14Rik	1	0	0	0	1
1700029H14Rik	1	0	0	0	1
1700029I15Rik	0.622287	-0.000152618	0.001	0.002	1
1700029J07Rik	0.175446	-0.00550581	0.034	0.04	1
1700030C12Rik	0.100503	0.00152317	0.001	0	1
1700030E10Rik	1	0	0	0	1
1700030F04Rik	0.378596	-0.000495057	0.001	0.001	1
1700030J22Rik	0.149184	0.00339271	0.004	0.001	1
1700030K09Rik	0.128298	-0.0185329	0.05	0.063	1
1700030L22Rik	1	0	0	0	1
1700030M09Rik	1	0	0	0	1
1700030N03Rik	1	0	0	0	1
1700034G24Rik	1	0	0	0	1
1700034H15Rik	0.703508	-0.00474643	0.02	0.023	1
1700034I23Rik	1	0	0	0	1
1700034J05Rik	0.580665	-0.00215178	0.003	0.004	1
1700034P13Rik	0.663958	0.00324217	0.006	0.005	1
1700036A12Rik	0.291196	-0.000673056	0	0	1
1700037C18Rik	0.797548	-0.00452738	0.036	0.038	1
1700037F03Rik	0.943003	-0.000495057	0.001	0.001	1
1700037H04Rik	0.381615	0.00957509	0.06	0.052	1
1700039M10Rik	0.197442	0.00101562	0.001	0	1
1700040D17Rik	0.628684	0.00169893	0.002	0.001	1
1700040L08Rik	0.0915077	0.00153334	0.002	0.001	1
1700041B01Rik	1	0	0	0	1
1700041G16Rik	0.753977	-0.00120567	0.013	0.014	1
1700041I07Rik	1	0	0	0	1
1700041M19Rik	0.291196	-0.000673056	0	0	1
1700042O10Rik	0.697628	-0.00874219	0.185	0.193	1
1700045H11Rik	0.408808	0.000507902	0	0	1
1700047A11Rik	0.393734	0.00186467	0.002	0	1
1700047F07Rik	0.434691	-0.00267427	0.001	0.003	1
1700047I17Rik2	0.847946	-0.000165154	0	0	1
1700047K16Rik	0.418845	-0.000837896	0	0.001	1
1700047M11Rik	0.664576	0.00204942	0.004	0.003	1
1700048M11Rik	0.0525309	0.00203054	0.001	0	1
1700048O20Rik	0.974395	-0.000770894	0.007	0.007	1
1700051A21Rik	1	0	0	0	1
1700052K11Rik	0.950723	0.000628499	0.033	0.033	1
1700054A03Rik	0.220679	0.00228765	0.013	0.014	1
1700055D18Rik	0.999936	2.45838e-05	0.003	0.003	1
1700056E22Rik	0.246816	-0.00482963	0.003	0.006	1
1700056N10Rik	0.276615	-0.00394443	0.006	0.009	1
1700057G04Rik	0.847946	-0.000165154	0	0	1
1700057H15Rik	0.291196	-0.000673056	0	0	1
1700057H21Rik	1	0	0	0	1
1700058P15Rik	0.322613	-0.00350851	0.002	0.004	1
1700060J05Rik	0.291196	-0.000673056	0	0	1
1700060O08Rik	1	0	0	0	1
1700061E17Rik	0.817209	0.00171873	0.005	0.004	1
1700061E18Rik	1	0	0	0	1
1700061G19Rik	0.334886	0.00255518	0.004	0.003	1
1700061H18Rik	0.847946	-0.000165154	0	0	1
1700061I17Rik	0.890396	0.000684738	0.001	0.001	1
1700061N14Rik	0.561967	0.00135748	0.001	0	1
1700063D05Rik	0.656952	0.00187435	0.003	0.002	1
1700063J08Rik	0.695291	-0.000140118	0.003	0.003	1
1700064H15Rik	0.590685	-0.000810983	0.003	0.004	1
1700064M15Rik	0.291196	-0.000673056	0	0	1
1700065D16Rik	0.408808	0.00101562	0	0	1
1700066B17Rik	1	0	0	0	1
1700066B19Rik	0.447803	-0.00805252	0.008	0.011	1
1700066M21Rik	0.53629	-0.00225687	0.037	0.037	1
1700067G17Rik	0.28302	0.000354391	0.001	0.002	1
1700067K01Rik	0.962092	-0.000330173	0.001	0.001	1
1700069B07Rik	1	0	0	0	1
1700069L16Rik	1	0	0	0	1
1700071G01Rik	1	0	0	0	1
1700071M16Rik	1	0	0	0	1
1700074H08Rik	0.440316	-0.00151032	0	0.001	1
1700080G11Rik	1	0	0	0	1
1700080N15Rik	1	0	0	0	1
1700081B01Rik	1	0	0	0	1
1700081N11Rik	0.408808	0.000507902	0	0	1
1700082M22Rik	0.385373	0.00305276	0.003	0.001	1
1700084C06Rik	0.25414	0.0175023	0.063	0.053	1
1700084E18Rik	0.413601	0.00745241	0.019	0.014	1
1700084F23Rik	0.946185	0.000696073	0.003	0.002	1
1700085C21Rik	1	0	0	0	1
1700085D07Rik	0.859586	-0.00412548	0.03	0.032	1
1700086D15Rik	1	0	0	0	1
1700086O06Rik	0.58649	0.00207162	0.029	0.029	1
1700086P04Rik	0.197442	0.00101562	0.001	0	1
1700087I21Rik	0.761391	0.000850114	0.001	0	1
1700087M22Rik	0.624801	-0.00148154	0.003	0.004	1
1700088E04Rik	0.842202	-0.00338926	0.01	0.011	1
1700092C17Rik	1	0	0	0	1
1700092M07Rik	0.197442	0.00101562	0.001	0	1
1700093J21Rik	0.0890032	0.0077762	0.013	0.007	1
1700093K21Rik	0.197442	0.00152317	0.001	0	1
1700094D03Rik	0.974605	-0.000774796	0.023	0.023	1
1700094J05Rik	0.752479	-0.00133161	0.001	0.002	1
1700094M23Rik	0.898413	0.00132775	0.019	0.018	1
1700095A13Rik	0.197442	0.00101562	0.001	0	1
1700095A21Rik	0.621698	-0.00116717	0.001	0.001	1
1700095B10Rik	1	0	0	0	1
1700095J03Rik	0.0146132	-0.0101705	0.003	0.009	1
1700095J07Rik	0.408808	0.000507902	0	0	1
1700095J12Rik	1	0	0	0	1
1700096J18Rik	0.737203	0.000342569	0.001	0	1
1700096K18Rik	0.389011	-0.00963124	0.031	0.035	1
1700097N02Rik	0.384175	0.00425034	0.007	0.005	1
1700099I09Rik	0.890396	0.000684738	0.001	0.001	1
1700101I11Rik	0.981665	0.000354391	0.002	0.002	1
1700102H20Rik	0.709958	0.0020682	0.007	0.006	1
1700102P08Rik	0.261726	0.00509166	0.009	0.005	1
1700104B16Rik	1	0	0	0	1
1700105P06Rik	0.745488	0.00137824	0.004	0.003	1
1700108F19Rik	0.625705	-0.00435749	0.013	0.016	1
1700108J01Rik	0.772554	-0.00213651	0.005	0.006	1
1700109G14Rik	1	0	0	0	1
1700109H08Rik	0.778259	-0.00611154	0.038	0.041	1
1700109K24Rik	0.244228	-0.00922763	0.017	0.024	1
1700110C19Rik	0.0577595	-0.00586323	0.001	0.004	1
1700110I01Rik	1	0	0	0	1
1700110K17Rik	0.408808	0.000507902	0	0	1
1700111E14Rik	0.737203	0.000342569	0.001	0	1
1700111N16Rik	0.0395251	-0.00201823	0	0.001	1
1700112D23Rik	0.870758	-0.00115325	0.002	0.003	1
1700112H15Rik	0.847946	-0.000165154	0	0	1
1700112J05Rik	0.291196	-0.000673056	0	0	1
1700112J16Rik	0.427377	0.00220577	0.002	0.001	1
1700112M02Rik	0.986715	-0.000317411	0.002	0.002	1
1700113A16Rik	0.587947	-0.00387396	0.012	0.015	1
1700113B09Rik	1	0	0	0	1
1700113H08Rik	0.103998	-0.0013458	0	0.001	1
1700119H24Rik	1	0	0	0	1
1700120B22Rik	0.318135	-0.00234652	0.001	0.002	1
1700120C14Rik	0.778003	0.00223329	0.007	0.005	1
1700120G07Rik	1	0	0	0	1
1700120G11Rik	0.737203	0.000342569	0.001	0	1
1700120K04Rik	0.408808	0.000507902	0	0	1
1700121C08Rik	1	0	0	0	1
1700122E12Rik	0.55973	-0.0020031	0.001	0.003	1
1700123J17Rik	1	0	0	0	1
1700123L14Rik	1	0	0	0	1
1700123M08Rik	0.927569	-0.00217281	0.027	0.028	1
1700123O12Rik	0.35491	0.00169893	0.001	0.001	1
1700123O20Rik	0.383316	-0.0191398	0.188	0.203	1
1700124L16Rik	0.408808	0.000507902	0	0	1
1700125G02Rik	0.408808	0.000507902	0	0	1
1700125G22Rik	1	0	0	0	1
1700125H03Rik	0.970748	-0.000920969	0.009	0.009	1
1700125H20Rik	0.847946	-0.000165154	0	0	1
1700126G02Rik	0.715437	-0.00170669	0.012	0.014	1
1810006J02Rik	0.665517	0.00408454	0.006	0.004	1
1810007D17Rik	0.489026	0.00240741	0.005	0.003	1
1810009A15Rik	0.964644	-0.00047434	0.039	0.039	1
1810010H24Rik	0.944948	0.000237278	0.007	0.007	1
1810010K12Rik	0.291196	-0.000673056	0	0	1
1810012K08Rik	0.847946	-0.000165154	0	0	1
1810012K16Rik	0.162993	-0.00484868	0.002	0.004	1
1810013D15Rik	0.747795	0.000684738	0.001	0.001	1
1810013L24Rik	0.34262	-0.00493831	0.294	0.287	1
1810014P07Rik	0.291196	-0.000673056	0	0	1
1810019D21Rik	0.46883	0.00289501	0.005	0.003	1
1810019N24Rik	0.409413	-0.000607176	0.006	0.007	1
1810020O05Rik	0.408808	0.000507902	0	0	1
1810021B22Rik	0.640173	0.00257255	0.007	0.005	1
1810024B03Rik	0.0041033	-0.0141862	0.031	0.045	1
1810026B05Rik	0.00235009	0.0550329	0.363	0.318	1
1810030O07Rik	0.566287	0.0127867	0.16	0.15	1
1810034E14Rik	0.479597	0.00762565	0.025	0.02	1
1810041H14Rik	0.88827	-0.000988901	0.002	0.003	1
1810044D09Rik	0.782722	-0.0030327	0.013	0.015	1
1810046K07Rik	0.197442	0.00101562	0.001	0	1
1810049J17Rik	0.408808	0.000507902	0	0	1
1810055G02Rik	0.785212	-0.00322743	0.011	0.013	1
1810058I24Rik	0.868842	-0.0136111	0.331	0.337	1
1810059C17Rik	0.128605	-0.00264228	0.004	0.006	1
1810059H22Rik	0.230654	-0.00630741	0.005	0.008	1
1810062G17Rik	0.977774	-0.000744355	0.01	0.01	1
1810062O18Rik	0.408113	-0.00268968	0.065	0.07	1
1810063I02Rik	0.291196	-0.000673056	0	0	1
1810073O08Rik	0.00388995	-0.0216908	0.032	0.041	1
2010001A14Rik	0.86944	-0.00314137	0.03	0.033	1
2010001K21Rik	0.728207	0.00119193	0.001	0.001	1
2010007H06Rik	0.73087	-0.00386409	0.036	0.04	1
2010009K17Rik	0.101803	0.00272091	0.004	0.002	1
2010013B24Rik	0.408808	0.000507902	0	0	1
2010016I18Rik	1	0	0	0	1
2010103J01Rik	1	0	0	0	1
2010106C02Rik	0.728207	0.00119193	0.001	0.001	1
2010106E10Rik	1	0	0	0	1
2010106G04Rik	0.962092	-0.000330173	0.001	0.001	1
2010109A12Rik	0.516073	-0.00491551	0.009	0.012	1
2010110G14Rik	0.906135	-0.000824421	0.002	0.002	1
2010110K18Rik	1	0	0	0	1
2010204K13Rik	0.51481	-0.00265825	0.003	0.004	1
2010300C02Rik	0.0200315	-0.0177391	0.018	0.026	1
2010308F09Rik	0.428498	0.00374634	0.007	0.005	1
2010309G21Rik	1	0	0	0	1
2010310C07Rik	0.853587	-0.00131746	0.003	0.004	1
2010315B03Rik	0.21701	-0.0237151	0.086	0.099	1
2010320M18Rik	0.675178	-0.00871658	0.072	0.076	1
2010320O07Rik	0.666	-0.000102825	0.007	0.007	1
2200002D01Rik	0.805211	0.00551956	0.031	0.028	1
2210011C24Rik	0.291196	-0.000673056	0	0	1
2210016F16Rik	0.490958	0.00795885	0.03	0.025	1
2210016L21Rik	0.858319	-0.00767499	0.261	0.263	1
2210406O10Rik	0.418845	-0.000837896	0	0.001	1
2210408F21Rik	0.946505	-0.00331595	0.209	0.212	1
2210408I21Rik	0.147349	-0.00272354	0.169	0.183	1
2210409D07Rik	1	0	0	0	1
2210411M09Rik	0.197442	0.00101562	0.001	0	1
2210414B05Rik	0.408808	0.000507902	0	0	1
2210417A02Rik	0.999968	1.23091e-05	0.001	0.001	1
2210418O10Rik	0.291196	-0.000673056	0	0	1
2300009A05Rik	0.433443	-0.019928	0.16	0.169	1
2310001H17Rik	0.906381	-0.00103947	0.101	0.102	1
2310001K24Rik	1	0	0	0	1
2310002D06Rik	1	0	0	0	1
2310002F09Rik	0.140559	-0.00264228	0.004	0.005	1
2310003N18Rik	1	0	0	0	1
2310005A03Rik	1	0	0	0	1
2310008N11Rik	0.408808	0.000507902	0	0	1
2310009A05Rik	0.237453	-0.023894	0.173	0.191	1
2310009B15Rik	0.190871	-0.025041	0.095	0.11	1
2310010J17Rik	0.00221444	-0.0421491	0.074	0.102	1
2310011J03Rik	0.00860012	0.0530217	0.221	0.188	1
2310014F06Rik	0.204439	0.00159375	0.01	0.007	1
2310015A10Rik	0.437425	-0.0129455	0.048	0.055	1
2310015A16Rik	0.134155	-0.00231541	0.002	0.005	1
2310015D24Rik	1	0	0	0	1
2310016D03Rik	0.761391	0.000850114	0.001	0	1
2310016G11Rik	1	0	0	0	1
2310022A10Rik	0.425479	0.01007	0.046	0.04	1
2310022B05Rik	0.227017	0.0281664	0.175	0.16	1
2310026I22Rik	0.103998	-0.0013458	0	0.001	1
2310026L22Rik	1	0	0	0	1
2310030A07Rik	1	0	0	0	1
2310030G06Rik	0.60971	-0.00026672	0.008	0.007	1
2310033P09Rik	0.652917	0.0147817	0.198	0.187	1
2310034G01Rik	0.930274	-0.00107051	0.01	0.011	1
2310034O05Rik	1	0	0	0	1
2310039H08Rik	0.614123	-0.0120952	0.123	0.129	1
2310039L15Rik	0.197442	0.00101562	0.001	0	1
2310040G24Rik	0.575014	-0.00482285	0.037	0.042	1
2310043M15Rik	0.663056	0.00187435	0.003	0.002	1
2310043O21Rik	0.00810866	0.00355156	0.002	0	1
2310044K18Rik	1	0	0	0	1
2310047D07Rik	0.622287	-0.000152618	0.001	0.002	1
2310057M21Rik	0.596777	-0.00330506	0.057	0.057	1
2310058D17Rik	0.787683	0.00264105	0.018	0.016	1
2310061I04Rik	0.911449	0.00326141	0.094	0.093	1
2310067P03Rik	0.249895	0.00287851	0.002	0	1
2310068J16Rik	0.192216	0.00190324	0.006	0.006	1
2310074N15Rik	0.197442	0.00101562	0.001	0	1
2310075C17Rik	1	0	0	0	1
2310081O03Rik	1	0	0	0	1
2410002F23Rik	0.231345	-0.0124416	0.034	0.043	1
2410003L11Rik	0.291196	-0.000673056	0	0	1
2410004B18Rik	0.0676121	0.0388009	0.194	0.169	1
2410004I01Rik	1	0	0	0	1
2410004P03Rik	0.291196	-0.000673056	0	0	1
2410006H16Rik	0.0147696	-0.0584402	0.241	0.266	1
2410018L13Rik	0.941933	-0.000975238	0.003	0.004	1
2410021H03Rik	1	0	0	0	1
2410022M11Rik	0.251131	-0.0156504	0.056	0.066	1
2410080I02Rik	0.351792	-0.00624457	0.009	0.013	1
2410124H12Rik	1	0	0	0	1
2410131K14Rik	0.976281	6.71613e-05	0.026	0.026	1
2410137M14Rik	1	0	0	0	1
2410152P15Rik	1	0	0	0	1
2500002B13Rik	0.491816	0.00746688	0.03	0.026	1
2500004C02Rik	0.254053	0.0110812	0.029	0.021	1
2510002D24Rik	0.270563	0.0205802	0.295	0.275	1
2510009E07Rik	0.0201422	-0.0466324	0.349	0.363	1
2510017J16Rik	0.0392486	0.00543807	0.012	0.007	1
2510039O18Rik	0.726428	-0.010096	0.125	0.13	1
2510046G10Rik	0.0347835	-0.0326007	0.088	0.11	1
2600002D14Rik	0.856744	0.00120255	0.003	0.002	1
2600006K01Rik	1	0	0	0	1
2600014E21Rik	0.408808	0.000507902	0	0	1
2610001J05Rik	0.592424	-3.12513e-05	0.351	0.344	1
2610002M06Rik	0.913815	-0.00649295	0.142	0.145	1
2610008E11Rik	0.0374077	0.0077446	0.131	0.118	1
2610020C07Rik	0.319448	0.00403698	0.09	0.093	1
2610021A01Rik	0.34423	-0.00943212	0.065	0.068	1
2610027K06Rik	0.233501	0.0122328	0.027	0.021	1
2610028E06Rik	1	0	0	0	1
2610028H24Rik	0.408808	0.000507902	0	0	1
2610035D17Rik	0.00369255	-0.0288718	0.031	0.049	1
2610035F20Rik	0.711176	-0.00506523	0.021	0.024	1
2610037D02Rik	0.658965	0.0178856	0.216	0.207	1
2610042L04Rik	1	0	0	0	1
2610044O15Rik8	0.916305	0.00415291	0.089	0.086	1
2610203C22Rik	0.943003	-0.000659806	0.001	0.001	1
2610204G07Rik	0.305986	0.00155359	0.005	0.003	1
2610206C17Rik	0.823044	0.000109553	0.011	0.011	1
2610300M13Rik	0.093774	-0.0153595	0.027	0.034	1
2610301B20Rik	0.307894	-0.0064639	0.08	0.088	1
2610306M01Rik	0.0117942	0.0120922	0.07	0.056	1
2610307P16Rik	0.701792	0.00948269	0.135	0.136	1
2610316D01Rik	0.906135	-0.000824421	0.002	0.002	1
2610318N02Rik	0.291196	-0.000673056	0	0	1
2610507B11Rik	0.277567	-0.0211231	0.269	0.288	1
2610507I01Rik	0.0419202	0.0174296	0.038	0.028	1
2610528A11Rik	0.847946	-0.000165154	0	0	1
2700033N17Rik	0.408808	0.000507902	0	0	1
2700038G22Rik	0.516802	-0.00216244	0.017	0.017	1
2700046A07Rik	0.114814	0.0166362	0.052	0.044	1
2700046G09Rik	0.212147	0.00627156	0.012	0.007	1
2700049A03Rik	0.0452837	-0.0329645	0.106	0.129	1
2700054A10Rik	0.676801	-0.0172764	0.167	0.176	1
2700062C07Rik	0.121416	-0.0189787	0.058	0.068	1
2700069I18Rik	0.393734	0.00186467	0.002	0	1
2700081O15Rik	0.299783	-0.00366887	0.065	0.063	1
2700089I24Rik	1	0	0	0	1
2700097O09Rik	0.438013	0.0165484	0.1	0.09	1
2810001G20Rik	0.957047	-0.00174547	0.081	0.083	1
2810002D19Rik	0.0475222	0.0248076	0.068	0.052	1
2810004N23Rik	0.822706	-0.0117407	0.164	0.17	1
2810006K23Rik	0.00987665	-0.033503	0.092	0.106	1
2810013P06Rik	0.38967	-0.0215475	0.155	0.169	1
2810021J22Rik	0.698544	0.00170885	0.003	0.002	1
2810029C07Rik	0.410862	0.00084216	0.04	0.038	1
2810030D12Rik	0.951392	0.000519497	0.002	0.001	1
2810032G03Rik	0.308953	0.00271242	0.003	0.001	1
2810049E08Rik	0.603527	-0.0010026	0.001	0.001	1
2810402E24Rik	0.781736	0.00670776	0.056	0.052	1
2810403D21Rik	0.00883442	-0.0447449	0.079	0.103	1
2810403G07Rik	0.440316	-0.00151032	0	0.001	1
2810404M03Rik	0.197442	0.00101562	0.001	0	1
2810405F17Rik	0.442835	0.00764734	0.046	0.04	1
2810407A14Rik	0.665724	0.00222414	0.005	0.004	1
2810408A11Rik	0.254419	0.00307672	0.008	0.005	1
2810408I11Rik	0.187076	-0.00301801	0.001	0.003	1
2810410L24Rik	0.114632	0.0178505	0.061	0.052	1
2810414N06Rik	0.750753	0.00036618	0.003	0.003	1
2810429I04Rik	0.962092	-0.000330173	0.001	0.001	1
2810432F15Rik	0.408808	0.000507902	0	0	1
2810433D01Rik	1	0	0	0	1
2810442N19Rik	0.371295	0.000354391	0.002	0.001	1
2810454H06Rik	0.15823	0.0140294	0.031	0.022	1
2810455O05Rik	0.572437	0.00169893	0.002	0.001	1
2810457G06Rik	0.756078	-0.00116717	0.001	0.002	1
2810459M11Rik	0.737203	0.000342569	0.001	0	1
2810468N07Rik	0.923023	0.00122371	0.006	0.005	1
2900005J15Rik	0.982996	0.0011188	0.033	0.033	1
2900009J06Rik	0.715421	0.00319357	0.026	0.025	1
2900026A02Rik	0.000127767	0.101232	0.54	0.491	1
2900040C04Rik	0.527604	0.0127915	0.006	0.004	1
2900041M22Rik	0.570465	-0.00326083	0.007	0.01	1
2900042K21Rik	1	0	0	0	1
2900045O20Rik	0.603527	-0.0010026	0.001	0.001	1
2900052L18Rik	0.277935	0.0152724	0.064	0.056	1
2900052N01Rik	0.829363	0.00109116	0.008	0.007	1
2900060B14Rik	0.131689	0.0135575	0.027	0.019	1
2900060N12Rik	0.521912	0.00323443	0.006	0.004	1
2900072N19Rik	0.408808	0.000507902	0	0	1
2900076A07Rik	0.872632	0.000730551	0.064	0.063	1
2900079G21Rik	0.622287	-0.00133161	0.001	0.002	1
2900089D17Rik	0.892478	0.00204413	0.026	0.024	1
2900092C05Rik	0.407014	0.00237168	0.001	0	1
2900093K20Rik	0.30763	0.0161716	0.07	0.059	1
2900097C17Rik	0.28496	-0.0283056	0.329	0.35	1
3010001F23Rik	0.839093	0.00102651	0.002	0.001	1
3010003L21Rik	0.425268	0.00119655	0.021	0.022	1
3100003L05Rik	0.418845	-0.000837896	0	0.001	1
3110001I22Rik	0.0991962	0.00994249	0.017	0.012	1
3110006O06Rik	0.291196	-0.000673056	0	0	1
3110009E18Rik	0.267721	-0.00484983	0.024	0.029	1
3110015C05Rik	1	0	0	0	1
3110021N24Rik	0.389436	-0.00264832	0.083	0.081	1
3110039M20Rik	0.941679	1.23091e-05	0.001	0.001	1
3110040N11Rik	0.268851	-0.01578	0.05	0.06	1
3110045C21Rik	0.24026	0.00171873	0.005	0.003	1
3110056K07Rik	0.592928	-0.00583539	0.205	0.204	1
3110070M22Rik	0.120056	-0.00853147	0.011	0.015	1
3110082I17Rik	0.150288	0.0197063	0.147	0.13	1
3110082J24Rik	0.561967	0.00135748	0.001	0	1
3110083C13Rik	0.053487	0.00203999	0.003	0.001	1
3110099E03Rik	1	0	0	0	1
3200001D21Rik	0.986715	-0.000317411	0.002	0.002	1
3222401L13Rik	0.208085	-0.0245851	0.144	0.153	1
3300002A11Rik	0.693858	0.00273782	0.006	0.005	1
3300002I08Rik	0.133616	-0.0266839	0.086	0.102	1
3300002P13Rik	1	0	0	0	1
3300005D01Rik	0.408808	0.000507902	0	0	1
3425401B19Rik	1	0	0	0	1
3632454L22Rik	0.734967	0.00119193	0.002	0.001	1
3830403N18Rik	0.750547	0.00120693	0.02	0.021	1
3830406C13Rik	0.333505	-0.0254074	0.195	0.21	1
3830408C21Rik	0.122835	-0.0152523	0.037	0.048	1
3830432H09Rik	1	0	0	0	1
3930402G23Rik	1	0	0	0	1
4430402I18Rik	0.0110025	-0.0108571	0.283	0.27	1
4631405J19Rik	0.100503	0.00152317	0.001	0	1
4632404H12Rik	0.410223	0.00532994	0.026	0.025	1
4632404M16Rik	0.761391	0.000850114	0.001	0	1
4632411P08Rik	0.990908	0.000177372	0.001	0.001	1
4632427E13Rik	0.615888	-0.0159325	0.22	0.231	1
4632428C04Rik	0.737203	0.000342569	0.001	0	1
4731419I09Rik	0.676202	-0.00247891	0.004	0.006	1
4732414G09Rik	0.418845	-0.000837896	0	0.001	1
4732419C18Rik	0.0395251	-0.00269034	0	0.001	1
4732440D04Rik	0.0393194	-0.0243884	0.084	0.095	1
4732463B04Rik	1	0	0	0	1
4732465J04Rik	0.408808	0.000507902	0	0	1
4732471J01Rik	0.574623	0.00264239	0.411	0.403	1
4732487G21Rik	0.0525309	0.00203054	0.001	0	1
4732491K20Rik	0.420797	-0.00780065	0.014	0.019	1
4732496C06Rik	0.253965	0.00222414	0.005	0.003	1
4831440D22Rik	0.136579	-0.00809931	0.007	0.013	1
4833403J16Rik	0.426747	0.0143379	0.086	0.079	1
4833407H14Rik	1	0	0	0	1
4833408A19Rik	0.542701	-0.00782241	0.022	0.027	1
4833411C07Rik	0.408808	0.000507902	0	0	1
4833412C05Rik	0.784305	0.00156367	0.006	0.005	1
4833413E03Rik	1	0	0	0	1
4833413G10Rik	0.750241	0.00261554	0.013	0.012	1
4833415N18Rik	0.847946	-0.000165154	0	0	1
4833417C18Rik	0.677391	-0.00494353	0.018	0.021	1
4833418N02Rik	0.778219	0.00120693	0.023	0.023	1
4833419F23Rik	0.834844	-0.00442376	0.032	0.035	1
4833420G17Rik	0.587722	0.0187335	0.24	0.229	1
4833422C13Rik	0.762019	-0.00145936	0.017	0.019	1
4833422M21Rik	1	0	0	0	1
4833427F10Rik	0.906135	-0.000824421	0.002	0.002	1
4833427G06Rik	0.895801	-0.000443325	0.006	0.007	1
4833428L15Rik	1	0	0	0	1
4833438C02Rik	0.78035	0.00470186	0.034	0.031	1
4833439L19Rik	0.575758	0.0211744	0.326	0.316	1
4833445I07Rik	0.308953	0.00271242	0.003	0.001	1
4921501I09Rik	0.291196	-0.000673056	0	0	1
4921504A21Rik	0.408808	0.000507902	0	0	1
4921504E06Rik	1	0	0	0	1
4921507G05Rik	0.747795	0.000684738	0.001	0.001	1
4921507P07Rik	0.110622	0.00927173	0.027	0.019	1
4921509O07Rik	0.847946	-0.000165154	0	0	1
4921511C10Rik	0.000189127	0.0566447	0.175	0.133	1
4921511I17Rik	0.561967	0.00135748	0.001	0	1
4921513I03Rik	0.659485	0.00135748	0.001	0	1
4921514A10Rik	0.197442	0.00101562	0.001	0	1
4921515E04Rik	0.103998	-0.0013458	0	0.001	1
4921516A02Rik	0.621195	0.0044465	0.014	0.011	1
4921517D16Rik	0.847946	-0.000165154	0	0	1
4921517D22Rik	0.45195	0.000684738	0.001	0	1
4921522P10Rik	1	0	0	0	1
4921523L03Rik	0.197442	0.00101562	0.001	0	1
4921524J17Rik	0.529422	-0.0223804	0.284	0.294	1
4921528I07Rik	1	0	0	0	1
4921531C22Rik	0.150757	0.00119655	0.021	0.023	1
4921534H16Rik	1	0	0	0	1
4921536K21Rik	0.847946	-0.000165154	0	0	1
4921539E11Rik	0.847946	-0.000165154	0	0	1
4921539H07Rik	0.943003	-0.000495057	0.001	0.001	1
4922502N22Rik	1	0	0	0	1
4930401C15Rik	0.100503	0.00152317	0.001	0	1
4930402F06Rik	1	0	0	0	1
4930402H24Rik	0.878815	-0.0109578	0.261	0.264	1
4930403D09Rik	1	0	0	0	1
4930403P22Rik	0.319875	-0.00432334	0.004	0.007	1
4930404A12Rik	0.847946	-0.000165154	0	0	1
4930404H11Rik	1	0	0	0	1
4930404H24Rik	1	0	0	0	1
4930404I05Rik	0.393734	0.00186467	0.002	0	1
4930404N11Rik	0.531027	-0.0034742	0.005	0.007	1
4930405A10Rik	0.962092	-0.000330173	0.001	0.001	1
4930405A21Rik	0.358203	0.00275463	0.01	0.007	1
4930405D01Rik	1	0	0	0	1
4930405D11Rik	1	0	0	0	1
4930405J17Rik	0.291196	-0.000673056	0	0	1
4930405O22Rik	0.418845	-0.000837896	0	0.001	1
4930406D18Rik	1	0	0	0	1
4930407G08Rik	1	0	0	0	1
4930407I19Rik	1	0	0	0	1
4930408O17Rik	0.761391	0.000850114	0.001	0	1
4930412B13Rik	1	0	0	0	1
4930412C18Rik	0.641512	0.000121557	0.013	0.014	1
4930412F09Rik	1	0	0	0	1
4930412L05Rik	1	0	0	0	1
4930412M03Rik	0.761391	0.000850114	0.001	0	1
4930413F20Rik	0.990908	0.000177372	0.001	0.001	1
4930414F18Rik	0.418845	-0.000330173	0	0.001	1
4930414N06Rik	0.419188	-0.00831243	0.031	0.037	1
4930415C11Rik	0.408808	0.000507902	0	0	1
4930415O20Rik	0.734967	0.00119193	0.002	0.001	1
4930417H01Rik	0.999936	2.45838e-05	0.003	0.003	1
4930417O13Rik	0.408808	0.000507902	0	0	1
4930419G24Rik	0.0525309	0.00203054	0.001	0	1
4930420G21Rik	0.408808	0.000507902	0	0	1
4930422I22Rik	0.408808	0.000507902	0	0	1
4930422M22Rik	0.370268	0.00339271	0.004	0.002	1
4930423D22Rik	1	0	0	0	1
4930425L21Rik	1	0	0	0	1
4930425O10Rik	0.50851	0.00678987	0.02	0.015	1
4930425P05Rik	0.382979	-0.00513486	0.005	0.008	1
4930426D05Rik	1	0	0	0	1
4930426I24Rik	0.98228	-9.04638e-05	0.008	0.008	1
4930426L09Rik	0.756078	-0.00116717	0.001	0.002	1
4930428E07Rik	0.408808	0.000507902	0	0	1
4930428N03Rik	1	0	0	0	1
4930429D17Rik	0.0525309	0.00203054	0.001	0	1
4930429F24Rik	0.49808	0.000883346	0.005	0.005	1
4930429H19Rik	1	0	0	0	1
4930430A15Rik	0.408808	0.000507902	0	0	1
4930430E12Rik	0.197442	0.00101562	0.001	0	1
4930430F08Rik	0.455972	0.0112885	0.074	0.065	1
4930431F10Rik	1	0	0	0	1
4930431L21Rik	1	0	0	0	1
4930431P03Rik	1	0	0	0	1
4930431P22Rik	0.996233	-0.000152618	0.002	0.002	1
4930432B10Rik	0.408461	0.0008723	0.004	0.003	1
4930432J09Rik	0.418845	-0.000837896	0	0.001	1
4930432K21Rik	0.0195479	0.00694473	0.014	0.008	1
4930433N12Rik	0.138501	0.00592376	0.007	0.003	1
4930434J06Rik	0.408808	0.000507902	0	0	1
4930435F18Rik	1	0	0	0	1
4930438A08Rik	1	0	0	0	1
4930438E09Rik	0.291196	-0.000673056	0	0	1
4930439A04Rik	1	0	0	0	1
4930439D14Rik	1	0	0	0	1
4930440I19Rik	0.847946	-0.000837896	0	0	1
4930441J16Rik	1	0	0	0	1
4930443O20Rik	0.181435	-0.00450446	0.002	0.005	1
4930444A19Rik	0.016979	-0.0191981	0.03	0.039	1
4930444F02Rik	1	0	0	0	1
4930444P10Rik	0.291196	-0.000673056	0	0	1
4930445B16Rik	0.408808	0.000507902	0	0	1
4930445E18Rik	1	0	0	0	1
4930445N08Rik	1	0	0	0	1
4930445N18Rik	1	0	0	0	1
4930447A16Rik	1	0	0	0	1
4930447C04Rik	0.761391	0.000850114	0.001	0	1
4930447F04Rik	1	0	0	0	1
4930447F24Rik	1	0	0	0	1
4930447J18Rik	1	0	0	0	1
4930447K03Rik	0.817296	0.00240741	0.007	0.006	1
4930447M23Rik	1	0	0	0	1
4930447N08Rik	0.473144	-0.00272519	0.011	0.013	1
4930448E22Rik	0.389156	-0.00267427	0.001	0.003	1
4930449E01Rik	0.291196	-0.000673056	0	0	1
4930449E18Rik	1	0	0	0	1
4930451E10Rik	0.291196	-0.000673056	0	0	1
4930451I11Rik	1	0	0	0	1
4930452A19Rik	0.440316	-0.00151032	0	0.001	1
4930452B06Rik	0.693615	0.00153334	0.002	0.001	1
4930452G13Rik	0.408808	0.000507902	0	0	1
4930453C13Rik	0.986715	-0.000317411	0.002	0.002	1
4930453N24Rik	0.918206	0.00597357	0.224	0.222	1
4930455C13Rik	0.688673	-0.00430321	0.017	0.02	1
4930455G09Rik	0.291196	-0.000673056	0	0	1
4930455H04Rik	0.30258	-0.00529677	0.005	0.008	1
4930455J16Rik	1	0	0	0	1
4930455M05Rik	1	0	0	0	1
4930458D05Rik	0.847946	-0.000165154	0	0	1
4930461C15Rik	0.839093	0.00102651	0.002	0.001	1
4930461G14Rik	1	0	0	0	1
4930465K09Rik	1	0	0	0	1
4930467D21Rik	0.408808	0.000507902	0	0	1
4930467E23Rik	1	0	0	0	1
4930467K11Rik	0.291196	-0.000673056	0	0	1
4930469K13Rik	0.943003	-0.000495057	0.001	0.001	1
4930470G03Rik	0.742972	4.90303e-05	0.005	0.006	1
4930470H14Rik	0.291196	-0.000673056	0	0	1
4930471C04Rik	1	0	0	0	1
4930471E19Rik	1	0	0	0	1
4930471G03Rik	1	0	0	0	1
4930471L23Rik	1	0	0	0	1
4930473A02Rik	0.00638979	0.0186939	0.026	0.015	1
4930473D10Rik	1	0	0	0	1
4930473H19Rik	0.361805	1.23091e-05	0.001	0.001	1
4930473O22Rik	1	0	0	0	1
4930474H06Rik	0.291196	-0.000673056	0	0	1
4930474M22Rik	1	0	0	0	1
4930477G07Rik	1	0	0	0	1
4930478K11Rik	1	0	0	0	1
4930478L05Rik	0.291196	-0.000673056	0	0	1
4930478M13Rik	0.944889	-0.000810983	0.003	0.004	1
4930479D17Rik	0.990908	0.000177372	0.001	0.001	1
4930480K15Rik	1	0	0	0	1
4930481A15Rik	0.0529284	0.0207296	0.048	0.036	1
4930481B07Rik	0.0825973	0.00474291	0.005	0.002	1
4930483J18Rik	0.737203	0.000342569	0.001	0	1
4930483K19Rik	1	0	0	0	1
4930483O08Rik	0.507186	-0.0020031	0.001	0.002	1
4930483P17Rik	0.103998	-0.0013458	0	0.001	1
4930484H19Rik	0.408808	0.000507902	0	0	1
4930484I04Rik	0.469888	-0.00867601	0.046	0.053	1
4930486F22Rik	0.291196	-0.000673056	0	0	1
4930486I03Rik	1	0	0	0	1
4930486L24Rik	0.930499	0.00352095	0.056	0.055	1
4930488L21Rik	0.61708	-0.00149591	0.002	0.002	1
4930488N15Rik	1	0	0	0	1
4930500A05Rik	0.61708	-0.00149591	0.002	0.002	1
4930500F10Rik	0.962092	-0.000330173	0.001	0.001	1
4930500H12Rik	0.847946	-0.00183897	0	0	1
4930500L23Rik	0.847946	0.000342569	0	0	1
4930500M09Rik	0.197442	0.00152317	0.001	0	1
4930502A04Rik	1	0	0	0	1
4930502E09Rik	0.737203	-0.000330173	0.001	0	1
4930502E18Rik	1	0	0	0	1
4930503L19Rik	0.0122609	0.0466259	0.189	0.158	1
4930505A04Rik	0.503861	0.00220577	0.002	0.001	1
4930505G20Rik	1	0	0	0	1
4930505M18Rik	1	0	0	0	1
4930505N22Rik	0.731745	3.68242e-05	0.004	0.004	1
4930506C21Rik	0.490638	0.000401349	0.007	0.007	1
4930507D05Rik	0.291196	-0.000673056	0	0	1
4930509E16Rik	0.946185	0.000696073	0.003	0.002	1
4930509G22Rik	0.727788	-0.00113936	0.004	0.004	1
4930509H03Rik	0.905851	-0.00386409	0.038	0.04	1
4930509J09Rik	0.103998	-0.0013458	0	0.001	1
4930511M06Rik	0.560208	-0.00247891	0.004	0.005	1
4930512B01Rik	0.881883	-0.000691715	0.014	0.015	1
4930512H18Rik	0.847946	-0.000165154	0	0	1
4930513D17Rik	0.734967	0.00119193	0.002	0.001	1
4930513N10Rik	0.656952	0.00187435	0.003	0.002	1
4930515G01Rik	0.567889	-0.00249466	0.002	0.004	1
4930515L19Rik	0.100503	0.00152317	0.001	0	1
4930516B21Rik	0.890396	0.000684738	0.001	0.001	1
4930517E14Rik	0.0459946	0.00439793	0.004	0	1
4930517O19Rik	0.374733	-0.0206189	0.172	0.179	1
4930518C09Rik	1	0	0	0	1
4930519K11Rik	1	0	0	0	1
4930519P11Rik	0.962092	-0.000330173	0.001	0.001	1
4930520M14Rik	0.507533	0.00186467	0.001	0	1
4930520O04Rik	0.291196	-0.000673056	0	0	1
4930521E06Rik	0.197442	0.00101562	0.001	0	1
4930522L14Rik	0.27224	-0.0238054	0.115	0.13	1
4930523C07Rik	0.209449	0.0173141	0.354	0.332	1
4930524B15Rik	0.847946	0.000342569	0	0	1
4930524O07Rik	0.890396	0.000684738	0.001	0.001	1
4930525C09Rik	0.408808	0.000507902	0	0	1
4930525G20Rik	0.512663	0.00272091	0.004	0.002	1
4930526L06Rik	1	0	0	0	1
4930527B05Rik	1	0	0	0	1
4930527F14Rik	0.470006	0.00191077	0.028	0.029	1
4930528G23Rik	1	0	0	0	1
4930529K09Rik	0.408808	0.000507902	0	0	1
4930532G15Rik	0.0173155	0.00591576	0.004	0	1
4930532I03Rik	0.761391	0.000850114	0.001	0	1
4930533B01Rik	1	0	0	0	1
4930533K18Rik	0.847946	-0.000165154	0	0	1
4930534D22Rik	0.0395251	-0.00201823	0	0.001	1
4930534H03Rik	0.408808	0.000507902	0	0	1
4930534H18Rik	0.100503	0.00203054	0.001	0	1
4930535L15Rik	0.0395251	-0.00201823	0	0.001	1
4930537H20Rik	0.962092	-0.000330173	0.001	0.001	1
4930538E20Rik	1	0	0	0	1
4930539E08Rik	0.291196	-0.000673056	0	0	1
4930539J05Rik	0.63464	-0.00189837	0.011	0.013	1
4930540M05Rik	0.408808	0.000507902	0	0	1
4930542C16Rik	1	0	0	0	1
4930542D17Rik	0.291196	-0.000673056	0	0	1
4930543E12Rik	1	0	0	0	1
4930544F09Rik	0.418845	-0.000837896	0	0.001	1
4930544I03Rik	0.408808	0.000507902	0	0	1
4930545L23Rik	0.420125	0.010792	0.082	0.073	1
4930546C10Rik	0.408808	0.000507902	0	0	1
4930546K05Rik	1	0	0	0	1
4930547E08Rik	1	0	0	0	1
4930547E14Rik	0.418845	-0.000837896	0	0.001	1
4930547M16Rik	0.103998	-0.0013458	0	0.001	1
4930548H24Rik	0.408808	0.000507902	0	0	1
4930548K13Rik	1	0	0	0	1
4930549C15Rik	0.0309659	-0.00734125	0.002	0.007	1
4930549G23Rik	0.653883	-0.00691111	0.039	0.042	1
4930550C14Rik	0.0771368	-0.0134439	0.019	0.028	1
4930550C17Rik	1	0	0	0	1
4930551O13Rik	0.603527	0.000177372	0.001	0.001	1
4930553P18Rik	0.100503	0.00203054	0.001	0	1
4930554G24Rik	0.408173	0.00203999	0.001	0.001	1
4930554H23Rik	1	0	0	0	1
4930555A03Rik	0.233382	0.00845198	0.032	0.029	1
4930555B11Rik	0.197442	0.00101562	0.001	0	1
4930555F03Rik	1	0	0	0	1
4930556G01Rik	0.291196	-0.000673056	0	0	1
4930556G22Rik	1	0	0	0	1
4930556J02Rik	0.847946	-0.000165154	0	0	1
4930556J24Rik	0.258868	-0.000840689	0.017	0.015	1
4930556M19Rik	0.252652	-0.0104258	0.103	0.114	1
4930556N09Rik	1	0	0	0	1
4930556N13Rik	0.023592	0.0136038	0.018	0.01	1
4930557F10Rik	1	0	0	0	1
4930557J02Rik	0.308953	0.00271242	0.003	0.001	1
4930557K07Rik	0.942845	-0.00133998	0.016	0.017	1
4930558J18Rik	1	0	0	0	1
4930558K02Rik	0.828854	0.000389659	0.005	0.006	1
4930562C15Rik	0.847946	-0.000165154	0	0	1
4930562F07Rik	0.890396	0.000684738	0.001	0.001	1
4930563E18Rik	0.311946	0.00287851	0.002	0	1
4930563E22Rik	0.586042	-0.00277325	0.007	0.009	1
4930563F08Rik	0.962092	-0.000330173	0.001	0.001	1
4930563I02Rik	1	0	0	0	1
4930563M21Rik	1	0	0	0	1
4930565D16Rik	0.408808	0.000507902	0	0	1
4930565N06Rik	0.263592	-0.00298503	0.003	0.006	1
4930566F21Rik	1	0	0	0	1
4930567H12Rik	0.408808	0.000507902	0	0	1
4930567K12Rik	1	0	0	0	1
4930567K20Rik	0.291196	-0.000673056	0	0	1
4930568A12Rik	0.408808	0.000507902	0	0	1
4930568G15Rik	1	0	0	0	1
4930570B17Rik	0.291196	-0.000673056	0	0	1
4930570G19Rik	0.36287	0.000696073	0.003	0.002	1
4930572G02Rik	0.408808	0.000507902	0	0	1
4930578E11Rik	1	0	0	0	1
4930578G10Rik	0.440316	-0.00151032	0	0.001	1
4930578M01Rik	0.806212	-0.000341573	0.017	0.016	1
4930578M07Rik	0.130126	-0.00285424	0	0.002	1
4930579C12Rik	0.408808	0.000507902	0	0	1
4930579D07Rik	0.100503	0.00152317	0.001	0	1
4930579F01Rik	0.197442	0.00101562	0.001	0	1
4930579G18Rik	0.417502	-0.0030015	0.002	0.004	1
4930579G24Rik	0.29767	0.00411704	0.015	0.011	1
4930579H20Rik	0.408808	0.000507902	0	0	1
4930579K19Rik	0.433881	0.00577385	0.012	0.009	1
4930579M01Rik	1	0	0	0	1
4930579O11Rik	1	0	0	0	1
4930581F22Rik	0.918926	0.00124761	0.19	0.188	1
4930583K01Rik	0.847946	-0.000165154	0	0	1
4930583P06Rik	1	0	0	0	1
4930586N03Rik	0.788141	-0.00229992	0.004	0.006	1
4930587E11Rik	0.291196	-0.000673056	0	0	1
4930588A03Rik	1	0	0	0	1
4930588G17Rik	1	0	0	0	1
4930588J15Rik	1	0	0	0	1
4930588K23Rik	0.986715	-0.000317411	0.002	0.002	1
4930589L23Rik	0.0495592	-0.00251046	0.001	0.003	1
4930589P08Rik	1	0	0	0	1
4930590J08Rik	0.736937	-0.00207587	0.01	0.011	1
4930590L20Rik	0.440316	-0.00151032	0	0.001	1
4930592A05Rik	0.0525309	0.00203054	0.001	0	1
4930592C13Rik	0.847946	-0.000165154	0	0	1
4930592I03Rik	0.197442	0.00101562	0.001	0	1
4930593A02Rik	0.337459	0.00291958	0.009	0.006	1
4930593C16Rik	1	0	0	0	1
4930594M22Rik	0.828309	0.00198925	0.158	0.16	1
4930594M22Rik.1	0.762503	-0.000774796	0.023	0.024	1
4930595D18Rik	0.528772	0.000377936	0.005	0.004	1
4930596I21Rik	0.291196	-0.000673056	0	0	1
4930597A21Rik	0.847946	-0.000165154	0	0	1
4930597O21Rik	0.627585	0.00186467	0.001	0	1
4930598N05Rik	1	0	0	0	1
4930599N23Rik	0.154446	0.0281674	0.131	0.118	1
4931403E22Rik	0.263817	-0.011966	0.027	0.033	1
4931406C07Rik	0.254198	-0.0238611	0.115	0.131	1
4931406G06Rik	0.943003	-0.000495057	0.001	0.001	1
4931406P16Rik	0.299357	0.0307258	0.912	0.909	1
4931407E12Rik	0.197442	0.00101562	0.001	0	1
4931413K12Rik	0.0998978	-0.0060048	0.003	0.007	1
4931414P19Rik	0.333342	-0.0117829	0.028	0.035	1
4931415C17Rik	0.761391	0.000850114	0.001	0	1
4931419H13Rik	1	0	0	0	1
4931422A03Rik	0.669975	0.00553714	0.041	0.037	1
4931423N10Rik	0.943003	-0.000495057	0.001	0.001	1
4931428F04Rik	0.718104	-0.00421442	0.011	0.014	1
4931428L18Rik	0.291196	-0.00201823	0	0	1
4931429L15Rik	0.847946	-0.000165154	0	0	1
4931429P17Rik	0.197442	0.00101562	0.001	0	1
4931431B13Rik	1	0	0	0	1
4931431C16Rik	1	0	0	0	1
4931440F15Rik	0.756078	-0.00116717	0.001	0.002	1
4932411K12Rik	1	0	0	0	1
4932412D23Rik	0.436094	-0.000659806	0.001	0.002	1
4932413F04Rik	1	0	0	0	1
4932414N04Rik	1	0	0	0	1
4932422M17Rik	0.877661	-0.00240079	0.01	0.012	1
4932435O22Rik	0.318135	-0.00234652	0.001	0.002	1
4932438A13Rik	0.249393	-0.0193781	0.414	0.436	1
4932438H23Rik	0.291196	-0.000673056	0	0	1
4932441J04Rik	0.741661	0.000519497	0.001	0.001	1
4932443L11Rik	0.604613	-0.00176507	0.008	0.009	1
4932702P03Rik	0.408808	0.000507902	0	0	1
4933400C23Rik	1	0	0	0	1
4933400F21Rik	0.468868	-0.00326083	0.008	0.009	1
4933400L20Rik	1	0	0	0	1
4933401D09Rik	1	0	0	0	1
4933401H06Rik	0.999968	1.23091e-05	0.001	0.001	1
4933401L05Rik	1	0	0	0	1
4933402D24Rik	0.291196	-0.000673056	0	0	1
4933402J07Rik	0.495877	0.00596695	0.02	0.018	1
4933402J15Rik	1	0	0	0	1
4933404O12Rik	0.729674	-0.00070482	0.014	0.014	1
4933405D12Rik	0.761391	0.000850114	0.001	0	1
4933405L10Rik	1	0	0	0	1
4933406B15Rik	1	0	0	0	1
4933406B17Rik	0.510195	-0.00167472	0.001	0.002	1
4933406C10Rik	0.515413	0.00763193	0.03	0.025	1
4933406I18Rik	0.619988	-0.00233094	0.002	0.002	1
4933406J09Rik	1	0	0	0	1
4933406J10Rik	0.197442	0.00101562	0.001	0	1
4933406P04Rik	0.859919	0.00155359	0.005	0.004	1
4933407E24Rik	1	0	0	0	1
4933407I05Rik	0.847946	-0.000165154	0	0	1
4933407I08Rik	1	0	0	0	1
4933407K13Rik	0.573055	-0.00627537	0.059	0.064	1
4933407L21Rik	0.100503	0.00152317	0.001	0	1
4933408B17Rik	0.470604	0.0095979	0.029	0.024	1
4933408J17Rik	0.737203	0.000342569	0.001	0	1
4933408N05Rik	1	0	0	0	1
4933409K07Rik	0.0466289	-0.00334514	0.001	0.004	1
4933411E02Rik	1	0	0	0	1
4933411E06Rik	0.737203	0.000850114	0.001	0	1
4933411E08Rik	0.460056	-0.000824421	0.001	0.002	1
4933411K16Rik	1	0	0	0	1
4933411O13Rik	1	0	0	0	1
4933412E12Rik	0.198981	0.00811435	0.017	0.011	1
4933412O06Rik	1	0	0	0	1
4933413C19Rik	1	0	0	0	1
4933413J09Rik	0.408808	0.000507902	0	0	1
4933413L06Rik	0.291196	-0.000673056	0	0	1
4933415A04Rik	0.917768	-0.00145291	0.006	0.007	1
4933416M07Rik	0.943003	-0.000659806	0.001	0.001	1
4933417D19Rik	0.962092	-0.000330173	0.001	0.001	1
4933417O13Rik	0.57784	-0.00441222	0.009	0.012	1
4933421A08Rik	0.983854	-0.00027934	0.006	0.006	1
4933421D24Rik	1	0	0	0	1
4933421O10Rik	0.461274	-0.0110271	0.033	0.039	1
4933422A05Rik	1	0	0	0	1
4933423P22Rik	0.0734675	8.54452e-05	0.01	0.008	1
4933424G05Rik	0.773179	0.000774543	0.012	0.012	1
4933424G06Rik	0.566659	-0.00167472	0.001	0.001	1
4933424L21Rik	0.697318	0.00188401	0.004	0.003	1
4933424M12Rik	0.58248	-0.000304685	0.004	0.003	1
4933425L06Rik	1	0	0	0	1
4933426B08Rik	0.291196	-0.000673056	0	0	1
4933426K07Rik	1	0	0	0	1
4933427D06Rik	0.245801	-0.00218244	0	0.002	1
4933427D14Rik	0.277853	0.000401349	0.007	0.007	1
4933427E11Rik	0.962092	-0.000330173	0.001	0.001	1
4933427I22Rik	0.737203	0.000342569	0.001	0	1
4933428C19Rik	0.291196	-0.000673056	0	0	1
4933428G20Rik	0.962092	-0.000330173	0.001	0.001	1
4933428P19Rik	0.291196	-0.000673056	0	0	1
4933429H19Rik	0.507186	-0.0020031	0.001	0.002	1
4933429O19Rik	0.847946	-0.000330173	0	0	1
4933430I17Rik	0.943003	-0.000495057	0.001	0.001	1
4933430M04Rik	1	0	0	0	1
4933431E20Rik	0.221135	-0.000856458	0.03	0.033	1
4933431G14Rik	1	0	0	0	1
4933431K23Rik	0.975132	-0.000633417	0.004	0.004	1
4933431M02Rik	1	0	0	0	1
4933432I03Rik	0.890396	0.000684738	0.001	0.001	1
4933432I09Rik	0.408808	0.000507902	0	0	1
4933432K03Rik	0.847946	-0.000165154	0	0	1
4933433G15Rik	0.909449	-0.000717962	0.012	0.013	1
4933433G19Rik	0.413265	-0.006566	0.009	0.013	1
4933433H22Rik	1	0	0	0	1
4933434E20Rik	0.329511	0.0062105	0.213	0.202	1
4933434M16Rik	1	0	0	0	1
4933435E02Rik	1	0	0	0	1
4933436I20Rik	0.291196	-0.000673056	0	0	1
4933439C10Rik	0.85058	-0.002242	0.038	0.039	1
4933439K11Rik	0.825508	0.00277135	0.012	0.01	1
4933439N14Rik	0.847946	-0.000165154	0	0	1
5031410I06Rik	1	0	0	0	1
5031415H12Rik	0.981665	0.000354391	0.002	0.002	1
5031425E22Rik	0.84802	0.00130301	0.36	0.354	1
5031425F14Rik	0.408808	0.00152317	0	0	1
5031434O11Rik	0.837046	0.00174822	0.009	0.007	1
5031439G07Rik	0.0220761	0.041439	0.13	0.109	1
5033403F01Rik	0.97253	0.000531059	0.003	0.003	1
5033403H07Rik	1	0	0	0	1
5033406O09Rik	0.474811	-0.011786	0.04	0.047	1
5033417F24Rik	0.937088	0.000959817	0.013	0.013	1
5033421B08Rik	0.737203	0.000342569	0.001	0	1
5033426O07Rik	1	0	0	0	1
5033428I22Rik	0.761391	0.000850114	0.001	0	1
5033430I15Rik	0.340211	0.00861447	0.03	0.023	1
5330411O13Rik	0.408808	0.000507902	0	0	1
5330413P13Rik	0.761391	0.000850114	0.001	0	1
5330416C01Rik	0.197442	0.00101562	0.001	0	1
5330417C22Rik	0.371295	0.000354391	0.002	0.001	1
5330426L24Rik	1	0	0	0	1
5330429C05Rik	1	0	0	0	1
5330434G04Rik	0.646044	-0.000633417	0.003	0.004	1
5330438D12Rik	0.243951	-0.0306709	0.173	0.19	1
5330438I03Rik	0.291196	-0.000673056	0	0	1
5330439A09Rik	1	0	0	0	1
5330439B14Rik	0.962092	-0.000330173	0.001	0.001	1
5330439K02Rik	0.600063	-0.00101611	0.015	0.016	1
5430400D12Rik	0.357103	0.00424402	0.007	0.004	1
5430401F13Rik	0.291196	-0.000673056	0	0	1
5430401H09Rik	1	0	0	0	1
5430402O13Rik	0.0724691	-0.0114924	0.012	0.017	1
5430403G16Rik	0.93165	0.000320657	0.035	0.034	1
5430403N17Rik	0.408808	0.000507902	0	0	1
5430405H02Rik	0.1953	-0.0268999	0.119	0.136	1
5430414B19Rik	0.630976	-0.00112551	0.005	0.006	1
5430416N02Rik	0.348041	0.00893964	0.046	0.042	1
5430421F17Rik	0.100503	0.00152317	0.001	0	1
5430425K12Rik	1	0	0	0	1
5430427M07Rik	0.372576	-0.0034742	0.004	0.007	1
5430427N15Rik	1	0	0	0	1
5430427O19Rik	0.102102	-0.00486777	0	0.002	1
5430431A17Rik	0.785085	-0.00367801	0.015	0.017	1
5430435K18Rik	1	0	0	0	1
5430440P10Rik	1	0	0	0	1
5530401A14Rik	0.291196	-0.000673056	0	0	1
5530601H04Rik	0.0469335	-0.00444189	0.088	0.084	1
5730403I07Rik	1	0	0	0	1
5730405O15Rik	0.473545	-0.000241586	0.01	0.011	1
5730409E04Rik	0.363459	0.017311	0.085	0.075	1
5730412P04Rik	1	0	0	0	1
5730414N17Rik	0.103769	-0.00423153	0.023	0.023	1
5730419F03Rik	0.277642	-0.00282171	0.002	0.005	1
5730420D15Rik	0.745378	0.00170885	0.004	0.002	1
5730435O14Rik	0.291196	-0.000673056	0	0	1
5730455P16Rik	0.864607	0.00595674	0.113	0.111	1
5730480H06Rik	0.485195	-0.00507838	0.098	0.098	1
5730507C01Rik	0.656952	0.00187435	0.003	0.002	1
5730522E02Rik	0.297674	-0.00892358	0.005	0.009	1
5830408C22Rik	0.35615	-0.00293591	0.007	0.01	1
5830416I19Rik	0.545278	-0.000317411	0.002	0.002	1
5830418P13Rik	1	0	0	0	1
5830428M24Rik	0.628116	-0.00131746	0.003	0.003	1
5830432E09Rik	0.561967	0.00135748	0.001	0	1
5830444B04Rik	0.10541	-0.00368918	0.001	0.003	1
5830448L01Rik	0.151123	0.0123987	0.029	0.021	1
5830454E08Rik	0.520716	0.0023145	0.017	0.017	1
5830468F06Rik	0.080778	0.00393239	0.011	0.007	1
5830487J09Rik	1	0	0	0	1
5930403N24Rik	0.761391	0.000850114	0.001	0	1
5930430L01Rik	0.794667	-0.00636812	0.058	0.063	1
5930435M05Rik	1	0	0	0	1
6030407O03Rik	0.737203	0.000850114	0.001	0	1
6030440G07Rik	0.847946	-0.000165154	0	0	1
6030442E23Rik	0.197442	0.00101562	0.001	0	1
6030442K20Rik	0.193493	-0.00715235	0.031	0.038	1
6030443J06Rik	0.269793	-0.0158062	0.028	0.034	1
6030445D17Rik	0.0133694	-0.00484983	0.026	0.025	1
6030458C11Rik	0.406537	-0.0151354	0.106	0.113	1
6030466F02Rik	1	0	0	0	1
6030468B19Rik	1	0	0	0	1
6030498E09Rik	0.408808	0.000507902	0	0	1
6230400D17Rik	0.249767	0.0115439	0.038	0.032	1
6330403K07Rik	0.155449	-0.0125758	0.02	0.028	1
6330403L08Rik	0.618232	-0.00407084	0.01	0.012	1
6330408M09Rik	0.497913	0.00158375	0.009	0.007	1
6330409D20Rik	0.247351	-0.00179451	0.005	0.007	1
6330411D24Rik	0.103998	-0.0013458	0	0.001	1
6330415G19Rik	0.35002	0.00290322	0.006	0.005	1
6330418K02Rik	0.488264	0.00443446	0.012	0.008	1
6330420H09Rik	1	0	0	0	1
6330562C20Rik	0.860764	-0.00210611	0.007	0.008	1
6330576A10Rik	1	0	0	0	1
6430503K07Rik	0.393499	-0.00234652	0	0.001	1
6430531B16Rik	1	0	0	0	1
6430548M08Rik	0.104729	0.0133327	0.071	0.067	1
6430550D23Rik	0.489466	0.00325758	0.01	0.008	1
6430553K19Rik	1	0	0	0	1
6430562O15Rik	0.566659	-0.00167472	0.001	0.001	1
6430571L13Rik	0.00441432	0.00405822	0.003	0	1
6430573P05Rik	0.119328	0.00377427	0.013	0.009	1
6430584L05Rik	1	0	0	0	1
6430590A07Rik	0.746913	-0.00799177	0.058	0.063	1
6430628N08Rik	0.408808	0.000507902	0	0	1
6430710C18Rik	0.408808	0.000507902	0	0	1
6530401F13Rik	0.734967	0.00119193	0.002	0.001	1
6530402F18Rik	0.615704	0.00630932	0.027	0.022	1
6530403H02Rik	0.418845	-0.000837896	0	0.001	1
6530409C15Rik	0.853315	-0.00472485	0.055	0.059	1
6530411M01Rik	1	0	0	0	1
6530413G14Rik	1	0	0	0	1
6530437J22Rik	0.512663	0.00272091	0.004	0.002	1
6720427I07Rik	0.0510742	-0.0155158	0.18	0.178	1
6720468P15Rik	1	0	0	0	1
6720483E21Rik	0.266475	0.00237168	0.002	0	1
6720489N17Rik	0.0820536	-0.00351688	0.013	0.017	1
6820408C15Rik	0.0705605	-0.0051933	0.001	0.004	1
7420700N18Rik	1	0	0	0	1
7530414M10Rik	1	0	0	0	1
7530416G11Rik	0.418845	-0.00151032	0	0.001	1
7630403G23Rik	0.408808	0.000507902	0	0	1
8030423F21Rik	1	0	0	0	1
8030423J24Rik	1	0	0	0	1
8030442B05Rik	0.36389	0.00237168	0.002	0	1
8030443G20Rik	1	0	0	0	1
8030451A03Rik	0.197442	0.00152317	0.001	0	1
8030451O07Rik	1	0	0	0	1
8030453O22Rik	0.761391	0.000850114	0.001	0	1
8030455M16Rik	1	0	0	0	1
8030456M14Rik	0.263493	-0.00428683	0.006	0.009	1
8030462N17Rik	0.0350382	-0.0393354	0.319	0.326	1
8030474K03Rik	0.408808	0.00101562	0	0	1
8430419K02Rik	1	0	0	0	1
8430422H06Rik	0.0525309	0.00203054	0.001	0	1
8430426J06Rik	0.196444	-0.00216709	0.001	0.003	1
8430429K09Rik	0.540003	0.0100495	0.058	0.051	1
8430430B14Rik	1	0	0	0	1
8430432A02Rik	0.269982	-0.0034742	0.004	0.007	1
9030025P20Rik	0.335757	-0.00552062	0.013	0.017	1
9030204H09Rik	1	0	0	0	1
9030404E10Rik	1	0	0	0	1
9030407P20Rik	0.398013	0.00380189	0.018	0.015	1
9030612E09Rik	0.276584	0.00120255	0.003	0.002	1
9030624G23Rik	0.567889	-0.00249466	0.002	0.004	1
9130008F23Rik	0.69392	-0.000254135	0.009	0.008	1
9130015G15Rik	0.291196	-0.000673056	0	0	1
9130015L21Rik	0.847946	-0.000165154	0	0	1
9130017K11Rik	0.00354091	0.0232827	0.084	0.063	1
9130019O22Rik	0.764167	-0.00197135	0.019	0.02	1
9130019P16Rik	0.926559	0.000412094	0.027	0.026	1
9130023H24Rik	0.0972857	0.00433099	0.026	0.021	1
9130024F11Rik	0.627104	-0.000975238	0.004	0.004	1
9130204K15Rik	0.0525309	0.00203054	0.001	0	1
9130213A22Rik	0.485941	0.00254647	0.003	0.001	1
9130221F21Rik	1	0	0	0	1
9130221H12Rik	0.373907	-0.00540295	0.021	0.023	1
9130227L01Rik	1	0	0	0	1
9130230L23Rik	0.291196	-0.000673056	0	0	1
9130230N09Rik	0.0831706	0.0189366	0.048	0.038	1
9130401M01Rik	0.670604	-0.00354596	0.11	0.11	1
9130410C08Rik	1	0	0	0	1
9130604C24Rik	0.462338	0.00313965	0.018	0.015	1
9230009I02Rik	1	0	0	0	1
9230102K24Rik	0.408808	0.000507902	0	0	1
9230104M06Rik	0.561967	0.00135748	0.001	0	1
9230109A22Rik	1	0	0	0	1
9230111E07Rik	0.0525309	0.00203054	0.001	0	1
9230112D13Rik	1	0	0	0	1
9230112E08Rik	0.767381	0.000883346	0.005	0.005	1
9230112J17Rik	0.197442	0.00101562	0.001	0	1
9230114K14Rik	0.0109326	-0.0342621	0.049	0.069	1
9230116L04Rik	0.720124	0.00018942	0.002	0.002	1
9230116N13Rik	0.722849	0.00244276	0.013	0.011	1
9230117E06Rik	1	0	0	0	1
9330020H09Rik	0.176602	-0.00428522	0.018	0.019	1
9330102E08Rik	0.659485	0.00135748	0.001	0	1
9330104G04Rik	0.57907	0.00136788	0.002	0.001	1
9330111N05Rik	0.31418	-0.00334514	0.001	0.003	1
9330117O12Rik	0.737203	-0.000330173	0.001	0	1
9330118I20Rik	0.291196	-0.000673056	0	0	1
9330121J05Rik	1	0	0	0	1
9330136K24Rik	0.638596	-0.00290339	0.023	0.026	1
9330151L19Rik	0.00329347	-0.0130293	0.008	0.018	1
9330154J02Rik	0.609084	-0.000824421	0.002	0.002	1
9330154K18Rik	1	0	0	0	1
9330158H04Rik	0.418845	-0.000837896	0	0.001	1
9330159F19Rik	0.510803	-0.00142444	0.007	0.007	1
9330159M07Rik	0.444071	-0.00634891	0.033	0.039	1
9330160F10Rik	0.4301	0.00811618	0.02	0.016	1
9330162012Rik	0.134634	-0.00725169	0.008	0.013	1
9330171B17Rik	1	0	0	0	1
9330175E14Rik	0.452334	0.00254647	0.002	0.001	1
9330175M20Rik	0.531234	0.00672851	0.135	0.127	1
9330179D12Rik	0.405114	0.0039121	0.007	0.005	1
9330182L06Rik	0.0129244	-0.0134058	0.007	0.014	1
9330185C12Rik	0.750884	-0.0010026	0.001	0.001	1
9330188P03Rik	0.958587	0.000389659	0.006	0.006	1
9330198I05Rik	0.291196	-0.000673056	0	0	1
9330198N18Rik	0.200551	0.00372519	0.003	0.001	1
9330199G10Rik	0.408808	0.000507902	0	0	1
9430002A10Rik	0.737203	0.000342569	0.001	0	1
9430014N10Rik	1	0	0	0	1
9430015G10Rik	0.526742	-0.0012527	0.041	0.04	1
9430018G01Rik	0.418845	-0.000837896	0	0.001	1
9430021M05Rik	0.291196	-0.000673056	0	0	1
9430037G07Rik	0.615182	-0.000633417	0.004	0.004	1
9430038I01Rik	0.0805391	0.0327631	0.124	0.104	1
9430041J12Rik	0.197442	0.00101562	0.001	0	1
9430060I03Rik	0.58097	-0.00378213	0.007	0.009	1
9430065F17Rik	0.242892	0.00406483	0.004	0.001	1
9430069I07Rik	0.408808	0.000507902	0	0	1
9430078K24Rik	0.720124	0.00018942	0.002	0.002	1
9430085M18Rik	0.0395251	-0.00269034	0	0.001	1
9430091E24Rik	0.424672	-0.0104835	0.045	0.049	1
9530018F02Rik	0.33041	-0.00712508	0.026	0.028	1
9530020I12Rik	0.737203	0.000342569	0.001	0	1
9530026F06Rik	1	0	0	0	1
9530026P05Rik	0.0865108	0.0548941	0.781	0.756	1
9530034E10Rik	0.998196	-0.000140118	0.003	0.003	1
9530036M11Rik	0.543359	-0.00183897	0.001	0.002	1
9530036O11Rik	0.761391	0.000850114	0.001	0	1
9530046B11Rik	0.427115	-0.00316491	0.002	0.004	1
9530051G07Rik	0.0877535	-0.00461096	0.006	0.01	1
9530052C20Rik	1	0	0	0	1
9530052E02Rik	0.747795	0.000684738	0.001	0.001	1
9530053A07Rik	1	0	0	0	1
9530059O14Rik	0.890396	0.000684738	0.001	0.001	1
9530062K07Rik	0.217152	0.00645069	0.015	0.013	1
9530068E07Rik	0.60876	-0.000737176	0.207	0.203	1
9530077C05Rik	0.97175	-0.000678646	0.016	0.017	1
9530080O11Rik	0.737203	0.000342569	0.001	0	1
9530082P21Rik	0.693996	-0.0102077	0.082	0.088	1
9530097N15Rik	0.590926	0.00662798	0.02	0.017	1
9630001P10Rik	1	0	0	0	1
9630002D21Rik	0.622287	-0.00133161	0.001	0.002	1
9630009A06Rik	1	0	0	0	1
9630013A20Rik	0.102053	0.00423131	0.004	0.001	1
9630013D21Rik	0.556943	-0.00180929	0.004	0.004	1
9630013K17Rik	1	0	0	0	1
9630014M24Rik	0.337024	-0.00274116	0.008	0.011	1
9630015K15Rik	0.197442	0.00101562	0.001	0	1
9630028B13Rik	0.999968	1.23091e-05	0.001	0.001	1
9630028H03Rik	0.396262	0.0229676	0.174	0.165	1
9630028I04Rik	1	0	0	0	1
9630041A04Rik	1	0	0	0	1
9830004L10Rik	0.197442	0.00101562	0.001	0	1
9830107B12Rik	1	0	0	0	1
9830132P13Rik	0.847946	-0.000165154	0	0	1
9830144P21Rik	1	0	0	0	1
9830166K06Rik	0.602169	-0.00441222	0.009	0.012	1
9930004E17Rik	0.737203	0.000342569	0.001	0	1
9930012K11Rik	0.897878	0.00282915	0.021	0.02	1
9930014A18Rik	0.760721	-0.000744355	0.009	0.01	1
9930021J03Rik	0.0621442	0.0515074	0.384	0.354	1
9930022D16Rik	0.408808	0.000507902	0	0	1
9930038B18Rik	0.986715	-0.000317411	0.002	0.002	1
9930104L06Rik	0.405211	0.00735024	0.063	0.056	1
9930111J21Rik1	0.110677	-0.0105936	0.016	0.022	1
9930111J21Rik2	0.729855	-5.84272e-06	0.327	0.322	1
a	0.908406	-0.00197135	0.019	0.021	1
A030001D20Rik	0.674836	0.00421765	0.072	0.068	1
A030005L19Rik	0.443021	-0.00229992	0.005	0.007	1
A130010J15Rik	0.0263571	0.0302767	0.087	0.067	1
A130014A01Rik	0.436479	0.0112918	0.072	0.067	1
A130051J06Rik	0.979577	-0.000607176	0.007	0.007	1
A130077B15Rik	0.100503	0.00152317	0.001	0	1
A1bg	0.408808	0.000507902	0	0	1
A1cf	1	0	0	0	1
A230001M10Rik	0.750884	-0.0010026	0.001	0.001	1
A230004M16Rik	1	0	0	0	1
A230005M16Rik	1	0	0	0	1
A230006K03Rik	0.474912	-0.00182411	0.002	0.002	1
A230009B12Rik	0.561967	0.00135748	0.001	0	1
A230020J21Rik	0.408808	0.000507902	0	0	1
A230028O05Rik	0.103998	-0.0013458	0	0.001	1
A230051N06Rik	1	0	0	0	1
A230056P14Rik	0.532347	-0.00570108	0.012	0.015	1
A230057D06Rik	0.0787873	-0.00582235	0.004	0.006	1
A230059L01Rik	0.291196	-0.000673056	0	0	1
A230060F14Rik	0.311239	-0.00198801	0.003	0.003	1
A230065N10Rik	0.742646	-0.00160193	0.007	0.008	1
A230072C01Rik	0.0635549	-0.00469099	0.024	0.029	1
A230072E10Rik	0.487488	0.00577801	0.014	0.01	1
A230077H06Rik	0.0982386	-0.00780065	0.014	0.02	1
A230083G16Rik	0.490967	0.00459984	0.011	0.008	1
A230083N12Rik	0.289632	0.00355888	0.004	0.001	1
A230087F16Rik	0.996233	-0.000152618	0.002	0.002	1
A230098N10Rik	1	0	0	0	1
A230103J11Rik	0.0575468	0.00558159	0.005	0.001	1
A230103O09Rik	1	0	0	0	1
A230107N01Rik	0.88827	-0.00115325	0.002	0.003	1
A230108P19Rik	0.445156	-0.00228448	0.005	0.007	1
A2m	0.761391	0.000850114	0.001	0	1
A2ml1	0.142559	0.00440406	0.004	0.001	1
A330008L17Rik	0.371295	0.000354391	0.002	0.001	1
A330009N23Rik	0.033107	0.0305828	0.11	0.094	1
A330015K06Rik	0.0250594	0.00743199	0.004	0	1
A330023F24Rik	0.0581862	0.0332193	0.292	0.264	1
A330032B11Rik	0.222345	0.00677049	0.011	0.006	1
A330033J07Rik	0.197442	0.00101562	0.001	0	1
A330035P11Rik	0.986715	-0.000317411	0.002	0.002	1
A330040F15Rik	0.314963	-0.00464834	0.004	0.007	1
A330041J22Rik	0.737203	0.000342569	0.001	0	1
A330048O09Rik	0.378596	-0.000495057	0.001	0.001	1
A330049N07Rik	0.750884	-0.0010026	0.001	0.001	1
A330069K06Rik	0.734967	0.00119193	0.002	0.001	1
A330070K13Rik	1	0	0	0	1
A330072L02Rik	1	0	0	0	1
A330074K22Rik	0.943003	-0.000495057	0.001	0.001	1
A330076C08Rik	0.427377	0.00220577	0.002	0.001	1
A330076H08Rik	0.00566087	-0.00234652	0	0.002	1
A330084C13Rik	0.270312	-0.00215178	0.003	0.003	1
A330087D11Rik	1	0	0	0	1
A330093E20Rik	0.761391	0.000850114	0.001	0	1
A330094K24Rik	1	0	0	0	1
A330102I10Rik	0.999968	1.23091e-05	0.001	0.001	1
A3galt2	0.702513	0.00204942	0.004	0.003	1
A430005L14Rik	0.230663	0.0218424	0.165	0.147	1
A430010J10Rik	0.0126495	-0.00734125	0.002	0.007	1
A430018G15Rik	0.131494	-0.0153268	0.029	0.039	1
A430027H14Rik	0.291196	-0.000673056	0	0	1
A430033K04Rik	0.827275	0.00439047	0.071	0.068	1
A430035B10Rik	0.661832	0.00829615	0.047	0.043	1
A430057M04Rik	0.408808	0.000507902	0	0	1
A430073D23Rik	0.550557	-0.0082381	0.045	0.049	1
A430078I02Rik	0.890396	0.000684738	0.001	0.001	1
A430090L17Rik	0.461012	-0.00048685	0.036	0.035	1
A430093F15Rik	0.0154841	-0.00269034	0	0.002	1
A430105J06Rik	0.551157	-0.00643933	0.018	0.022	1
A430106G13Rik	0.0952577	-0.00296861	0.004	0.007	1
A430108G06Rik	0.737203	0.000342569	0.001	0	1
A430110L20Rik	0.562378	-0.00379965	0.005	0.007	1
A4galt	0.0655494	0.05251	0.368	0.348	1
A4gnt	1	0	0	0	1
A530001N23Rik	1	0	0	0	1
A530010L16Rik	0.291196	-0.000673056	0	0	1
A530013C23Rik	0.100503	0.00152317	0.001	0	1
A530016L24Rik	0.570367	0.00324217	0.007	0.005	1
A530017D24Rik	0.574887	0.00188132	0.051	0.048	1
A530021J07Rik	1	0	0	0	1
A530032D15Rik	0.291196	-0.000673056	0	0	1
A530040E14Rik	0.408808	0.000507902	0	0	1
A530041M06Rik	0.848829	0.00193189	0.011	0.01	1
A530046M15Rik	1	0	0	0	1
A530053G22Rik	0.418845	-0.000837896	0	0.001	1
A530058N18Rik	1	0	0	0	1
A530064D06Rik	1	0	0	0	1
A530065N20Rik	1	0	0	0	1
A530072M11Rik	0.254473	-0.0176762	0.046	0.055	1
A530076I17Rik	1	0	0	0	1
A530083I20Rik	0.709724	-0.000291995	0.005	0.005	1
A530084C06Rik	0.414466	0.0100563	0.05	0.047	1
A530088E08Rik	0.906135	-0.000824421	0.002	0.002	1
A530095I07Rik	0.408808	0.000507902	0	0	1
A630001G21Rik	0.0770632	0.0079429	0.012	0.006	1
A630001O12Rik	0.962092	-0.000330173	0.001	0.001	1
A630009H07Rik	1	0	0	0	1
A630012P03Rik	0.28766	0.00389848	0.004	0.002	1
A630014C17Rik	0.313064	0.00728107	0.016	0.011	1
A630019I02Rik	1	0	0	0	1
A630023P12Rik	0.408808	0.000507902	0	0	1
A630052C17Rik	0.0658184	0.0138982	0.027	0.017	1
A630072L19Rik	0.408808	0.000507902	0	0	1
A630072M18Rik	0.808042	0.00494577	0.127	0.124	1
A630073D07Rik	1	0	0	0	1
A630089N07Rik	0.594535	-0.00936893	0.071	0.074	1
A630095N17Rik	1	0	0	0	1
A730004F24Rik	0.741661	0.000519497	0.001	0.001	1
A730009L09Rik	1	0	0	0	1
A730011C13Rik	0.576766	-0.000659806	0.001	0.001	1
A730017L22Rik	0.114579	0.00728314	0.016	0.014	1
A730018C14Rik	0.990908	0.000177372	0.001	0.001	1
A730020E08Rik	0.474069	-0.00115325	0.002	0.003	1
A730020M07Rik	0.291196	-0.000673056	0	0	1
A730035I17Rik	1	0	0	0	1
A730036I17Rik	1	0	0	0	1
A730043L09Rik	0.197442	0.00101562	0.001	0	1
A730045E13Rik	1	0	0	0	1
A730046J19Rik	1	0	0	0	1
A730049H05Rik	0.983827	-0.00026672	0.007	0.007	1
A730056A06Rik	0.761184	0.00155359	0.005	0.004	1
A730060N03Rik	1	0	0	0	1
A730061H03Rik	0.501604	0.00306077	0.005	0.003	1
A730063M14Rik	0.93415	-0.000678646	0.015	0.016	1
A730071L15Rik	0.600349	-0.000646593	0.002	0.003	1
A730081D07Rik	0.582912	0.0150035	0.126	0.117	1
A730085K08Rik	0.561967	0.00135748	0.001	0	1
A730090N16Rik	0.543359	-0.00183897	0.001	0.002	1
A730098A19Rik	0.291196	-0.000673056	0	0	1
A830005F24Rik	0.737203	0.000342569	0.001	0	1
A830008E24Rik	0.963474	0.000707377	0.004	0.004	1
A830009L08Rik	0.734967	0.00119193	0.002	0.001	1
A830011K09Rik	0.291196	-0.000673056	0	0	1
A830012C17Rik	1	0	0	0	1
A830018L16Rik	0.13218	-0.00446741	0.004	0.008	1
A830019L24Rik	0.291196	-0.000673056	0	0	1
A830019P07Rik	0.737203	0.000342569	0.001	0	1
A830021F12Rik	1	0	0	0	1
A830029E22Rik	0.408808	0.00101562	0	0	1
A830031A19Rik	0.291196	-0.000673056	0	0	1
A830035A12Rik	1	0	0	0	1
A830035O19Rik	0.303287	0.00156367	0.005	0.006	1
A830036E02Rik	1	0	0	0	1
A830052D11Rik	0.197442	0.00101562	0.001	0	1
A830082K12Rik	0.259311	-0.000814223	0.019	0.017	1
A830082N09Rik	0.644999	-0.00376465	0.008	0.01	1
A830092H15Rik	0.408808	0.000507902	0	0	1
A930001A20Rik	0.418845	-0.000330173	0	0.001	1
A930001C03Rik	0.890396	0.000684738	0.001	0.001	1
A930001M01Rik	0.118739	-0.0125072	0.018	0.027	1
A930002C04Rik	1	0	0	0	1
A930002H24Rik	0.0525309	0.00203054	0.001	0	1
A930003A15Rik	1	0	0	0	1
A930003O13Rik	1	0	0	0	1
A930004D18Rik	0.159628	0.0155951	0.044	0.033	1
A930005H10Rik	0.184518	-0.00836986	0.104	0.104	1
A930006K02Rik	0.368419	-0.00734125	0.11	0.109	1
A930006L05Rik	0.839093	0.00102651	0.002	0.001	1
A930007I19Rik	0.183754	-0.0101772	0.043	0.044	1
A930009A15Rik	0.507533	0.00186467	0.001	0	1
A930012L18Rik	0.752362	0.00245153	0.013	0.012	1
A930012O16Rik	0.958946	0.000588389	0.01	0.009	1
A930014D07Rik	1	0	0	0	1
A930015D03Rik	0.413457	-0.00139911	0.152	0.147	1
A930016O22Rik	0.408808	0.000507902	0	0	1
A930017K11Rik	0.103998	-0.0013458	0	0.001	1
A930018P22Rik	0.962092	-0.000330173	0.001	0.001	1
A930019D19Rik	1	0	0	0	1
A930023M06Rik	0.291196	-0.000673056	0	0	1
A930024E05Rik	0.842842	0.00175799	0.01	0.008	1
A930028N01Rik	0.199958	0.00960923	0.018	0.012	1
A930029G22Rik	0.238992	-0.00531641	0.004	0.008	1
A930033H14Rik	0.246917	-0.0077097	0.072	0.08	1
A930033M14Rik	0.659485	0.00135748	0.001	0	1
A930037H05Rik	0.66534	-0.00326823	0.067	0.067	1
A930041C12Rik	0.847946	-0.000165154	0	0	1
A930104D05Rik	1	0	0	0	1
AA386476	0.956202	0.000639534	0.032	0.033	1
AA387200	1	0	0	0	1
AA387883	0.761391	0.000850114	0.001	0	1
AA388235	0.99272	0.000389659	0.006	0.006	1
AA467197	0.291196	-0.000673056	0	0	1
AA645442	1	0	0	0	1
AA986860	0.0604776	-0.010914	0.007	0.014	1
Aaas	0.554698	0.00288498	0.057	0.053	1
Aacs	0.100308	0.0124237	0.022	0.014	1
Aadat	1	0	0	0	1
Aagab	0.046048	-0.0291353	0.087	0.108	1
Aak1	0.967458	0.00361671	0.381	0.382	1
Aamdc	0.75648	-0.0150318	0.292	0.301	1
Aamp	0.0105356	0.0600852	0.382	0.341	1
Aanat	0.408808	0.000507902	0	0	1
Aar2	0.168398	-0.0165327	0.104	0.111	1
Aard	0.847946	-0.000165154	0	0	1
Aars	0.506975	-0.00839135	0.105	0.108	1
Aars2	0.285372	-0.00680052	0.016	0.021	1
Aarsd1	0.897651	-0.00155213	0.225	0.224	1
Aasdh	0.979068	-0.000168807	0.035	0.035	1
Aasdhppt	0.291026	0.0189502	0.177	0.161	1
Aass	0.675858	0.00102651	0.001	0.001	1
Aatf	0.0170044	-0.0425906	0.104	0.126	1
Aatk	0.487235	0.0026495	0.017	0.014	1
AB041806	0.408808	0.000507902	0	0	1
AB124611	0.0395251	-0.00201823	0	0.001	1
Abat	0.0651157	0.00910897	0.023	0.015	1
Abca12	1	0	0	0	1
Abca13	0.418845	-0.000837896	0	0.001	1
Abca14	0.417502	-0.0030015	0.002	0.004	1
Abca15	0.197442	0.00101562	0.001	0	1
Abca16	1	0	0	0	1
Abca17	0.100503	0.00203054	0.001	0	1
Abca2	0.890042	-0.00240656	0.049	0.051	1
Abca3	0.0101672	0.0558666	0.239	0.204	1
Abca4	0.276006	-0.0116995	0.031	0.035	1
Abca5	0.975532	0.00369159	0.131	0.13	1
Abca6	0.561967	0.00135748	0.001	0	1
Abca7	0.0112125	-0.025265	0.096	0.104	1
Abca8a	0.252985	0.00643774	0.011	0.007	1
Abca8b	0.741323	-0.00177977	0.006	0.007	1
Abca9	0.0427449	0.0126121	0.014	0.008	1
Abcb10	0.458396	0.0163168	0.112	0.101	1
Abcb11	1	0	0	0	1
Abcb1a	0.766592	-0.00529235	0.986	0.986	1
Abcb1b	0.404422	0.00312405	0.014	0.014	1
Abcb4	0.734967	0.00119193	0.002	0.001	1
Abcb5	0.103998	-0.00269034	0	0.001	1
Abcb6	0.895037	-0.00279097	0.02	0.022	1
Abcb7	0.349893	-0.0265764	0.196	0.211	1
Abcb8	0.464474	-0.0070321	0.021	0.025	1
Abcb9	0.0569948	0.000937666	0.033	0.03	1
Abcc1	0.0478568	-0.0226986	0.046	0.062	1
Abcc10	0.753144	-0.00271199	0.025	0.028	1
Abcc12	0.291196	-0.000673056	0	0	1
Abcc2	0.603527	0.000177372	0.001	0.001	1
Abcc3	0.151647	0.00102651	0.002	0.001	1
Abcc4	0.606133	-0.0111652	0.875	0.874	1
Abcc5	0.286004	0.0115967	0.167	0.154	1
Abcc6	6.87461e-05	-0.0655104	0.147	0.194	1
Abcc8	0.737203	0.000342569	0.001	0	1
Abcc9	0.0240202	0.122589	0.08	0.067	1
Abcd1	0.92218	0.00176254	0.077	0.077	1
Abcd2	0.49702	-0.000757606	0.007	0.009	1
Abcd3	0.826408	0.00877842	0.188	0.184	1
Abcd4	0.7375	0.0110479	0.105	0.099	1
Abce1	0.544402	-0.00102387	0.233	0.228	1
Abcf1	0.537381	0.0221175	0.425	0.41	1
Abcf2	0.474211	0.0139156	0.164	0.153	1
Abcf3	0.913331	-9.97318e-05	0.129	0.13	1
Abcg1	0.967151	-0.00264393	0.114	0.116	1
Abcg2	6.58372e-05	0.0930117	0.976	0.968	1
Abcg3	0.987352	0.00164224	0.056	0.055	1
Abcg4	0.890396	0.000684738	0.001	0.001	1
Abhd10	0.549391	0.0134785	0.106	0.098	1
Abhd11	0.800952	-0.00409223	0.057	0.06	1
Abhd12	0.791272	-0.0105081	0.158	0.166	1
Abhd12b	0.847946	-0.000165154	0	0	1
Abhd13	0.755994	-0.00278511	0.096	0.1	1
Abhd14a	0.590717	0.00244802	0.062	0.059	1
Abhd14b	0.895874	0.00470383	0.141	0.137	1
Abhd15	0.596918	0.00272937	0.005	0.004	1
Abhd16a	0.339608	0.00150442	0.226	0.233	1
Abhd17a	0.35526	-0.00731092	0.494	0.487	1
Abhd17b	0.524566	0.0232724	0.16	0.148	1
Abhd17c	0.846477	-0.000863429	0.076	0.075	1
Abhd18	0.733841	-0.0017096	0.103	0.102	1
Abhd2	0.0474909	-0.0698729	0.88	0.893	1
Abhd3	0.00736746	0.0196817	0.025	0.013	1
Abhd4	0.545838	-0.00271484	0.113	0.119	1
Abhd5	0.5878	-0.0136607	0.202	0.208	1
Abhd6	0.126993	0.00779071	0.163	0.166	1
Abhd8	0.259963	0.0181202	0.118	0.104	1
Abi1	0.317638	0.0302548	0.574	0.553	1
Abi2	0.247727	-0.0291262	0.198	0.212	1
Abi3	0.211251	0.0168026	0.068	0.056	1
Abi3bp	0.506232	-0.000744355	0.008	0.01	1
Abitram	0.729734	0.00490541	0.045	0.042	1
Abl1	0.398367	-0.00402583	0.173	0.169	1
Abl2	0.793078	0.00980745	0.231	0.23	1
Ablim2	0.682946	-0.00403527	0.012	0.014	1
Ablim3	0.0801719	-0.0157122	0.02	0.029	1
Abr	0.665729	0.0209367	0.29	0.282	1
Abra	0.744847	-0.00149591	0.002	0.003	1
Abracl	0.683815	0.0129289	0.222	0.212	1
Abraxas1	0.69951	0.00571452	0.045	0.041	1
Abraxas2	0.304388	0.0229219	0.179	0.162	1
Abt1	0.00629131	0.0463671	0.155	0.124	1
Abtb1	0.566358	-0.00156352	0.069	0.072	1
Abtb2	0.521805	0.00334081	0.022	0.019	1
AC103362.1	0.847946	-0.000165154	0	0	1
AC106834.1	0.847946	-0.000165154	0	0	1
AC109619.1	0.890396	0.000684738	0.001	0.001	1
AC113595.1	0.385989	-0.00360243	0.007	0.01	1
AC125149.2	0.100503	0.00152317	0.001	0	1
AC125149.3	0.291196	-0.000673056	0	0	1
AC132307.1	0.0967997	-0.0106203	0.013	0.021	1
AC132444.5	0.408808	0.000507902	0	0	1
AC132444.6	1	0	0	0	1
AC133103.1	0.291196	-0.000673056	0	0	1
AC135859.1	0.904466	0.000861222	0.002	0.002	1
AC137513.1	0.59791	-0.00243191	0.008	0.009	1
AC142100.1	0.291196	-0.000673056	0	0	1
AC149090.1	0.00089649	0.0915338	0.426	0.391	1
AC150683.1	0.847946	0.000850114	0	0	1
AC151602.1	1	0	0	0	1
AC154200.1	0.092624	0.00726853	0.008	0.004	1
AC156546.1	0.92437	-0.000659806	0.001	0.002	1
AC159140.1	0.408808	0.000507902	0	0	1
AC160336.1	0.661815	-0.00290339	0.01	0.012	1
AC160966.1	1	0	0	0	1
AC163347.1	0.408808	0.000507902	0	0	1
AC163638.2	0.29081	0.000413007	0.009	0.007	1
AC163685.1	1	0	0	0	1
AC166172.1	0.423572	-0.00428683	0.006	0.009	1
AC168977.1	1	0	0	0	1
AC171003.1	1	0	0	0	1
AC241534.1	0.361798	0.00310836	0.012	0.011	1
Acaa1a	0.0814249	-0.0199454	0.23	0.234	1
Acaa1b	1	0	0	0	1
Acaa2	0.327134	-0.0289301	0.296	0.311	1
Acaca	0.00448544	-0.0596245	0.142	0.173	1
Acacb	0.501167	-0.00806913	0.277	0.276	1
Acad10	0.607794	-0.0103807	0.057	0.063	1
Acad11	0.291432	-0.00195146	0.075	0.079	1
Acad12	0.437813	-0.0115218	0.069	0.078	1
Acad8	0.397999	0.0078787	0.118	0.109	1
Acad9	0.973282	-0.00252718	0.082	0.083	1
Acadl	0.0360509	-0.0428896	0.458	0.495	1
Acadm	0.095642	0.0423834	0.354	0.324	1
Acads	0.749088	0.00730853	0.135	0.129	1
Acadsb	0.840519	0.0085129	0.217	0.21	1
Acadvl	0.577921	-0.0161527	0.179	0.187	1
Acan	0.408808	0.000507902	0	0	1
Acap1	0.236926	0.00355888	0.004	0.001	1
Acap2	0.736033	0.0168105	0.409	0.399	1
Acap3	0.189743	0.00483037	0.068	0.062	1
Acat1	0.037308	0.0449815	0.268	0.236	1
Acat2	0.398197	0.0113184	0.06	0.055	1
Acat3	0.996233	-0.000152618	0.002	0.002	1
Acbd3	0.12854	0.0221832	0.378	0.354	1
Acbd4	0.493847	0.0129825	0.082	0.075	1
Acbd5	0.10372	-0.039912	0.401	0.431	1
Acbd6	0.88372	0.00615917	0.363	0.357	1
Acbd7	0.847946	-0.000165154	0	0	1
Accs	0.998095	0.000261008	0.011	0.011	1
Accsl	1	0	0	0	1
Acd	0.383377	0.000398164	0.098	0.101	1
Ace	0.486619	-0.0115383	0.071	0.075	1
Ace2	0.205439	0.0225109	0.04	0.031	1
Acer3	0.188501	-0.0127814	0.132	0.147	1
Ache	0.00575901	-0.012615	0.006	0.011	1
[truncated: 21,344 more rows]

## Sheet: DEG_Microglia
SYMBOL	p_val	avg_log2FC	pct.1	pct.2	p_val_adj
Ccdc85a	2.51415e-81	-0.270633	0.004	0.088	4.44452e-77
Hbb-bs	9.86162e-40	-0.238072	0.111	0.226	1.74334e-35
Ttr	3.76677e-32	0.523084	0.565	0.465	6.6589e-28
Hba-a1	9.90417e-29	-0.148541	0.053	0.129	1.75086e-24
Abcg1	3.89361e-25	-0.213686	0.276	0.377	6.88312e-21
Hba-a2	7.32957e-20	-0.0827911	0.024	0.071	1.29572e-15
Anxa3	3.74078e-17	0.18572	0.593	0.526	6.61295e-13
Malat1	3.82542e-17	0.174196	0.996	0.997	6.76258e-13
Lyz2	1.03533e-15	-0.111089	0.446	0.547	1.83026e-11
Snap25	2.45657e-15	-0.131428	0.129	0.201	4.34272e-11
Eif2s3y	7.74297e-15	-0.168758	0.204	0.284	1.3688e-10
AC149090.1	9.50322e-15	0.181449	0.891	0.857	1.67998e-10
Mpp7	2.35796e-14	0.108625	0.094	0.046	4.1684e-10
Dusp6	1.71106e-13	0.170609	0.484	0.403	3.02481e-09
Hbb-bt	8.26426e-13	-0.0532599	0.021	0.053	1.46096e-08
Nrgn	8.98346e-13	-0.112359	0.103	0.163	1.5881e-08
Celf2	2.08719e-12	0.166334	0.958	0.954	3.68974e-08
Abca1	2.39859e-12	-0.169328	0.842	0.882	4.24023e-08
Igkc	1.02388e-11	-0.0201146	0	0.009	1.81002e-07
Ppp1r21	2.99994e-11	-0.154466	0.699	0.759	5.30329e-07
Adamts13	5.57918e-11	0.0155058	0.01	0	9.86287e-07
Gm43305	1.08625e-10	0.0512711	0.048	0.019	1.92027e-06
Apoe	1.82671e-10	0.419204	0.671	0.602	3.22926e-06
Gm22146	2.34866e-10	-0.124214	0.156	0.216	4.15196e-06
Fcrls	3.31284e-10	0.132708	0.985	0.982	5.85643e-06
Cd52	3.57616e-10	-0.140674	0.768	0.827	6.32193e-06
Fkbp5	3.72972e-10	-0.16218	0.897	0.921	6.5934e-06
Capn11	4.96889e-10	0.0650498	0.087	0.047	8.78401e-06
Atp1a2	5.65559e-10	0.0764993	0.087	0.048	9.99795e-06
Xist	6.10048e-10	0.0779787	0.696	0.622	1.07844e-05
Ndrg4	6.72035e-10	-0.0693238	0.039	0.073	1.18802e-05
Ccnd3	8.273e-10	0.155187	0.91	0.898	1.4625e-05
Slc15a2	1.75605e-09	0.109494	0.205	0.147	3.10435e-05
Mrc2	2.42856e-09	0.124826	0.24	0.18	4.29321e-05
Cbl	2.47666e-09	0.0992758	0.562	0.548	4.37825e-05
Ptgds	2.54575e-09	0.148328	0.288	0.224	4.50038e-05
Prnp	8.01619e-09	-0.110583	0.175	0.232	0.00014171
Bmp2k	1.09324e-08	0.112177	0.956	0.959	0.000193263
Penk	1.22948e-08	-0.0233457	0.003	0.016	0.000217347
Hk2	2.90307e-08	0.11439	0.883	0.853	0.000513205
Sncb	3.40985e-08	-0.0427493	0.02	0.044	0.000602794
Usp9y	4.10344e-08	0.0273365	0.011	0.001	0.000725406
Il17ra	4.38438e-08	0.119057	0.349	0.295	0.000775071
Gm10115	4.41595e-08	0.0201615	0.014	0.002	0.000780652
Bri3	5.6055e-08	-0.0534067	0.718	0.778	0.00099094
Nr1d1	6.08454e-08	0.029647	0.039	0.018	0.00107563
Plxna4	6.42847e-08	-0.147623	0.816	0.853	0.00113643
Tsix	8.43103e-08	0.104056	0.216	0.162	0.00149044
Rest	1.17522e-07	0.0799955	0.193	0.142	0.00207755
Ddx3y	1.20068e-07	-0.0752291	0.213	0.267	0.00212257
Lrmda	1.67115e-07	-0.129847	0.925	0.941	0.00295425
Dalrd3	1.74661e-07	0.0714769	0.15	0.105	0.00308765
Pnp	1.86661e-07	0.0801148	0.652	0.657	0.00329979
Pmp22	1.95415e-07	-0.0860735	0.558	0.624	0.00345454
Ptprz1	2.24206e-07	0.038778	0.038	0.016	0.00396352
Arhgap45	2.89985e-07	0.122187	0.862	0.851	0.00512635
Nhs	2.92243e-07	0.154192	0.139	0.096	0.00516627
Nlrp3	3.50841e-07	0.0941483	0.272	0.215	0.00620217
Mlxip	4.02089e-07	-0.0939546	0.542	0.607	0.00710813
Prune2	5.41018e-07	0.0865089	0.178	0.133	0.00956412
Chn1	5.57819e-07	-0.0558195	0.041	0.07	0.00986113
H2-D1	6.08654e-07	-0.133437	0.655	0.712	0.0107598
Pigu	6.15643e-07	0.0878315	0.231	0.18	0.0108833
Tmem158	6.61527e-07	-0.0251812	0.007	0.021	0.0116945
Iffo1	6.72904e-07	0.0990128	0.321	0.267	0.0118956
Slc7a7	7.30963e-07	-0.120729	0.5	0.562	0.012922
Akt3	7.53561e-07	0.135131	0.336	0.277	0.0133215
Chordc1	7.95609e-07	0.0881264	0.309	0.251	0.0140648
Eepd1	8.44337e-07	-0.0894383	0.139	0.185	0.0149262
Gm31323	8.84487e-07	0.0475228	0.047	0.024	0.015636
Fosb	1.01751e-06	-0.0938923	0.058	0.085	0.0179876
Ppp6r2	1.12978e-06	0.084857	0.233	0.181	0.0199723
Etv5	1.13023e-06	0.0970394	0.298	0.25	0.0199802
Nsg2	1.16907e-06	-0.0474163	0.03	0.055	0.0206667
Mmp28	1.49644e-06	0.0495018	0.069	0.04	0.026454
Creld2	1.51421e-06	0.0585395	0.13	0.091	0.0267682
Olfm1	1.5854e-06	-0.0633788	0.061	0.094	0.0280268
Snrpn	1.59385e-06	-0.0475264	0.035	0.055	0.0281761
Mllt10	2.06039e-06	-0.0553915	0.642	0.699	0.0364236
G530011O06Rik	2.07755e-06	0.09171	0.22	0.177	0.0367269
Xlr3b	2.20627e-06	-0.0137167	0.003	0.013	0.0390024
Pbx3	2.51747e-06	0.10932	0.33	0.274	0.0445037
Rbm3	2.53011e-06	-0.100713	0.348	0.389	0.0447272
Hspe1	2.86226e-06	0.0536012	0.602	0.623	0.0505991
Adcy8	2.94e-06	0.104858	0.161	0.119	0.0519734
Bicral	3.07314e-06	0.0519972	0.297	0.247	0.0543269
Rpl26	3.13494e-06	-0.122444	0.965	0.967	0.0554195
H2-K1	3.15057e-06	-0.107943	0.635	0.691	0.0556959
Lsp1	3.50332e-06	-0.081024	0.156	0.203	0.0619317
St13	3.64064e-06	0.0480197	0.651	0.665	0.0643593
Tada3	4.10875e-06	0.0493047	0.113	0.078	0.0726344
Pdia6	4.55715e-06	0.0538696	0.662	0.672	0.0805612
Bckdha	4.83085e-06	0.0726589	0.25	0.2	0.0853998
Med12l	4.86293e-06	0.111328	0.511	0.456	0.0859668
Derl2	5.23667e-06	0.0713078	0.296	0.243	0.0925739
Dusp1	5.26155e-06	-0.210613	0.19	0.223	0.0930136
Eml6	5.63108e-06	0.125768	0.373	0.326	0.0995463
Parp1	5.68886e-06	0.036832	0.23	0.191	0.100568
Slc25a5	5.75712e-06	-0.0622471	0.642	0.698	0.101774
Cdkn1b	5.80099e-06	0.0681094	0.243	0.194	0.10255
Rplp1	6.19604e-06	-0.135374	0.996	0.997	0.109534
Uba52	6.52583e-06	-0.0685063	0.381	0.379	0.115364
Capn3	7.76566e-06	0.0670262	0.624	0.627	0.137281
Lpar6	8.46856e-06	0.0960377	0.4	0.345	0.149707
Rcbtb2	9.05286e-06	0.0869633	0.741	0.724	0.160037
Rgl2	9.72363e-06	0.0570115	0.188	0.146	0.171894
Scn2a	1.08761e-05	-0.0326872	0.015	0.031	0.192268
Apex1	1.10189e-05	0.0454394	0.171	0.133	0.194792
Cenpb	1.15958e-05	0.0359797	0.139	0.107	0.204991
Arhgef40	1.16689e-05	0.0794685	0.292	0.242	0.206283
C3ar1	1.20914e-05	-0.0814686	0.492	0.55	0.213751
Hes1	1.20926e-05	0.142525	0.205	0.162	0.213773
Adgrl2	1.26939e-05	0.108578	0.288	0.241	0.224403
Fhit	1.33498e-05	-0.133207	0.676	0.722	0.235998
Pcsk2	1.50154e-05	-0.0334993	0.019	0.036	0.265442
Enpp2	1.50653e-05	0.0493473	0.078	0.05	0.266324
Rasgrp3	1.64035e-05	0.0862023	0.924	0.901	0.289982
Rnf169	1.65007e-05	-0.10998	0.74	0.784	0.2917
Marcks	1.67735e-05	-0.0812138	0.994	0.996	0.296522
Calu	1.7333e-05	0.0740501	0.249	0.207	0.306413
Pvt1	1.75004e-05	-0.110773	0.549	0.6	0.309371
Msmo1	1.78046e-05	0.0648979	0.157	0.119	0.314749
Borcs5	1.85197e-05	0.0527351	0.093	0.063	0.327391
Hdlbp	1.86088e-05	0.0947228	0.434	0.384	0.328967
Pald1	1.87355e-05	0.082641	0.381	0.327	0.331207
Dynll1	1.88858e-05	0.0938189	0.423	0.372	0.333862
Snrnp48	1.9534e-05	0.0720376	0.287	0.238	0.345322
9630013A20Rik	1.97065e-05	-0.00133676	0.002	0.001	0.348372
Nlrp1b	2.01539e-05	-0.0945716	0.265	0.314	0.35628
Dusp7	2.0289e-05	0.0526276	0.278	0.233	0.358669
Rpl9-ps6	2.03039e-05	0.0455311	0.096	0.066	0.358933
Gm13710	2.0887e-05	-0.0899539	0.145	0.174	0.36924
Usf2	2.19976e-05	0.0765204	0.386	0.332	0.388873
Gabra4	2.20822e-05	-0.0190124	0.003	0.013	0.39037
Arpp21	2.28886e-05	-0.0326028	0.021	0.039	0.404624
Dock8	2.40258e-05	0.104041	0.926	0.914	0.424729
Uty	2.46886e-05	-0.0445227	0.251	0.294	0.436445
Glb1	2.52517e-05	0.0625293	0.257	0.211	0.446399
Arhgdib	2.53626e-05	0.0212035	0.619	0.643	0.448361
Plpp3	2.62758e-05	0.0421534	0.094	0.065	0.464503
Hspa8	2.70087e-05	0.119435	0.961	0.946	0.47746
Kcnrg	2.90059e-05	0.0721273	0.126	0.092	0.512766
Ttc3	2.96098e-05	0.0421665	0.42	0.373	0.523442
Riok1	3.04831e-05	0.0564098	0.153	0.115	0.53888
Rnf10	3.17562e-05	0.0720288	0.237	0.193	0.561387
Rpl27a	3.18085e-05	-0.102161	0.987	0.982	0.562311
Ramp2	3.25267e-05	0.0268375	0.031	0.015	0.575008
Rpl11	3.36388e-05	-0.0925371	0.973	0.969	0.594667
Thy1	3.50546e-05	-0.0331152	0.019	0.037	0.619695
Neurl3	3.60806e-05	0.126932	0.289	0.255	0.637832
Ptpn18	3.65947e-05	-0.0713236	0.726	0.773	0.64692
1600002K03Rik	3.70984e-05	0.0417266	0.087	0.058	0.655826
Hspb1	3.75709e-05	0.078392	0.036	0.019	0.664178
Cct7	3.86912e-05	0.0385091	0.28	0.24	0.683983
Grn	3.93486e-05	-0.0866407	0.96	0.963	0.695604
Ing4	4.10565e-05	0.0659921	0.267	0.22	0.725797
Clu	4.13054e-05	0.0596979	0.101	0.073	0.730198
Ppp1r9b	4.20104e-05	0.0628948	0.239	0.194	0.74266
Map11	4.43666e-05	0.064666	0.257	0.211	0.784312
Ubac1	4.77489e-05	0.0076272	0.138	0.119	0.844105
Zfp710	4.77904e-05	0.0981946	0.846	0.815	0.844838
Coq9	4.84009e-05	0.0312659	0.097	0.072	0.855631
Hsp90ab1	5.01393e-05	0.102469	0.965	0.951	0.886363
Zfpl1	5.12713e-05	0.0481814	0.102	0.072	0.906374
Slc9a9	5.29155e-05	-0.0951906	0.937	0.948	0.93544
Ldah	5.31097e-05	0.0643095	0.275	0.229	0.938872
S100a8	5.46434e-05	0.0117999	0.008	0.001	0.965986
Gadd45g	5.58925e-05	0.122918	0.156	0.119	0.988068
0610005C13Rik	0.844666	-0.00212587	0.008	0.009	1
0610009B22Rik	0.304053	0.011467	0.156	0.144	1
0610009E02Rik	0.889198	0.00226754	0.019	0.018	1
0610009L18Rik	0.410709	-0.00516717	0.033	0.037	1
0610010F05Rik	0.211892	0.025632	0.121	0.108	1
0610010K14Rik	0.110376	-0.011948	0.281	0.277	1
0610012D04Rik	0.604	0.00135793	0.001	0.001	1
0610012G03Rik	0.224519	0.00609145	0.256	0.244	1
0610025J13Rik	0.904836	0.000178938	0.002	0.001	1
0610030E20Rik	0.449813	0.0102665	0.184	0.174	1
0610039K10Rik	0.970711	-0.000285293	0.009	0.009	1
0610040B10Rik	0.602756	-0.00566166	0.019	0.022	1
0610040J01Rik	0.942205	-0.00360582	0.859	0.861	1
0610043K17Rik	0.752162	0.00824935	0.066	0.062	1
1010001B22Rik	0.50696	0.000698241	0.005	0.004	1
1100001I12Rik	0.299182	-0.000468012	0.006	0.005	1
1110002J07Rik	0.906688	-0.000664776	0.002	0.002	1
1110002L01Rik	0.0122084	0.0169333	0.122	0.105	1
1110004F10Rik	0.20774	0.027497	0.327	0.307	1
1110006O24Rik	0.606025	0.00340641	0.011	0.009	1
1110008P14Rik	0.27762	-0.013097	0.04	0.048	1
1110012L19Rik	0.140883	0.0131534	0.052	0.042	1
1110013H19Rik	0.597245	0.00154552	0.006	0.005	1
1110017D15Rik	0.288581	0.00356469	0.006	0.005	1
1110019D14Rik	0.00800815	-0.0190949	0.16	0.152	1
1110020A21Rik	0.315308	0.00574864	0.009	0.006	1
1110032A03Rik	0.479095	-0.00731946	0.146	0.147	1
1110032F04Rik	0.887896	-0.00050202	0.001	0.001	1
1110035H17Rik	0.554103	0.00722701	0.026	0.022	1
1110038B12Rik	0.803109	0.00940196	0.126	0.122	1
1110038F14Rik	0.0398053	0.035085	0.175	0.152	1
1110046J04Rik	0.191985	9.64411e-05	0.013	0.015	1
1110051M20Rik	0.357065	0.0205897	0.174	0.161	1
1110059E24Rik	0.402769	0.0104731	0.197	0.186	1
1110059G10Rik	0.0257988	0.0372536	0.195	0.17	1
1110065P20Rik	0.795261	0.00526933	0.078	0.074	1
1190005I06Rik	0.703549	0.00157354	0.013	0.011	1
1190007I07Rik	0.69834	-0.00834919	0.08	0.086	1
1200007C13Rik	0.2717	0.00169623	0.001	0.001	1
1300002E11Rik	0.0224751	-0.00520197	0.058	0.055	1
1300014J16Rik	0.80335	0.000851988	0.002	0.001	1
1300017J02Rik	0.298433	0.0102928	0.036	0.033	1
1500002C15Rik	0.0259513	0.0091041	0.01	0.004	1
1500002F19Rik	0.00462719	0.00169623	0.002	0	1
1500004A13Rik	0.952332	-0.00699186	0.137	0.138	1
1500009C09Rik	0.863314	0.000194067	0.004	0.004	1
1500009L16Rik	0.202428	0.00271067	0.002	0.001	1
1500011B03Rik	0.0337375	0.00162996	0.065	0.059	1
1500015A07Rik	0.92569	-0.00232417	0.04	0.041	1
1500015L24Rik	0.604	0.00135793	0.001	0.001	1
1500026H17Rik	0.399998	0.00574806	0.013	0.009	1
1500032F14Rik	0.322309	-0.00149845	0.003	0.003	1
1500035N22Rik	0.756597	0.00157354	0.01	0.01	1
1600002D24Rik	0.218604	-0.00235748	0	0.002	1
1600010M07Rik	0.332856	0.017611	0.211	0.208	1
1600012H06Rik	0.238429	0.00175464	0.129	0.122	1
1600014C10Rik	0.122974	0.0279013	0.142	0.126	1
1600020E01Rik	0.20326	-0.0123192	0.117	0.118	1
1600022D10Rik	0.0700141	0.0156538	0.094	0.081	1
1700001C19Rik	0.582818	0.00670984	0.043	0.039	1
1700001G11Rik	0.683102	0.00121482	0.007	0.006	1
1700001K19Rik	0.89005	0.000684526	0.002	0.001	1
1700001K23Rik	0.808321	0.00038273	0.008	0.007	1
1700001L05Rik	0.128106	0.00340641	0.011	0.008	1
1700001L19Rik	0.494346	0.00186666	0.002	0.001	1
1700001P01Rik	0.818834	0.000681085	0.001	0.001	1
1700003D09Rik	0.635433	-0.000163399	0.001	0.001	1
1700003F12Rik	0.474359	0.00873722	0.067	0.061	1
1700007J10Rik	0.806572	-0.00148854	0.003	0.004	1
1700007K13Rik	0.558911	0.00101955	0.001	0.001	1
1700007L15Rik	0.623039	0.00374246	0.013	0.01	1
1700008J07Rik	0.981403	0.000264785	0.017	0.017	1
1700008O03Rik	0.622602	0.00121482	0.005	0.006	1
1700009J07Rik	0.0834095	0.00625346	0.008	0.004	1
1700010I14Rik	0.0462681	-0.00529748	0.035	0.034	1
1700010K24Rik	0.948638	-0.00109967	0.01	0.011	1
1700010L04Rik	0.537471	-0.00134649	0	0.001	1
1700011L22Rik	0.521466	0.0121362	0.042	0.037	1
1700012B09Rik	0.637774	0.000848664	0.001	0	1
1700012D14Rik	0.895786	-0.0109679	0.109	0.112	1
1700013F07Rik	0.231833	0.00186405	0.002	0	1
1700013H16Rik	0.943996	0.000342544	0.001	0.001	1
1700013M08Rik	0.89005	0.000684526	0.002	0.001	1
1700014D04Rik	0.338949	0.000175143	0.001	0.001	1
1700015O11Rik	0.943996	0.000342544	0.001	0.001	1
1700016D06Rik	0.133251	0.00288629	0.005	0.003	1
1700016K05Rik	0.236641	0.00392638	0.02	0.016	1
1700016K19Rik	0.0367055	0.00203197	0.001	0	1
1700016P03Rik	0.998154	-0.000135282	0.005	0.005	1
1700017B05Rik	0.332576	0.023625	0.506	0.489	1
1700017D01Rik	0.154951	0.000851988	0.002	0.001	1
1700017J07Rik	0.555132	0.00135793	0.001	0.001	1
1700018A23Rik	0.526043	0.00135793	0.002	0.001	1
1700018L02Rik	0.334737	-0.00334896	0.002	0.003	1
1700019A02Rik	0.781947	0.00102595	0.003	0.002	1
1700019D03Rik	0.806095	0.00291616	0.014	0.012	1
1700019L13Rik	0.147966	-0.00550505	0.005	0.009	1
1700020D05Rik	0.315694	0.00119645	0.003	0.002	1
1700020L24Rik	0.887896	-0.00050202	0.001	0.001	1
1700020N01Rik	0.870566	-0.00160469	0.03	0.03	1
1700021F05Rik	0.583056	0.0102727	0.076	0.07	1
1700021F07Rik	0.361454	0.00203446	0.001	0.001	1
1700022I11Rik	0.655535	-0.00228017	0.009	0.011	1
1700022N22Rik	0.974022	0.000548955	0.008	0.008	1
1700023F06Rik	0.931444	7.83992e-06	0.001	0.001	1
1700023H06Rik	0.247966	0.00091427	0.013	0.014	1
1700025G04Rik	0.664747	-0.0102976	0.09	0.095	1
1700025N21Rik	0.334029	0.00152567	0.001	0	1
1700025N23Rik	0.447854	0.00440722	0.008	0.006	1
1700026F02Rik	0.635433	-0.00100778	0.001	0.001	1
1700026N04Rik	0.244278	-0.00269045	0.001	0.002	1
1700027A07Rik	0.227175	0.00541282	0.005	0.003	1
1700027A15Rik	0.98885	0.000175143	0.001	0.001	1
1700027J07Rik	0.399773	0.00169623	0.002	0.001	1
1700028E10Rik	0.392658	-0.0027264	0.083	0.08	1
1700028J19Rik	0.433858	0.0027167	0.004	0.003	1
1700028K03Rik	0.697925	-0.000434383	0.009	0.01	1
1700028N14Rik	0.0937898	0.00473799	0.004	0.001	1
1700028P14Rik	0.887896	-0.00083621	0.001	0.001	1
1700029I15Rik	0.670081	0.00169896	0.002	0.001	1
1700029J07Rik	0.659648	-0.00404622	0.031	0.032	1
1700030E10Rik	0.469578	0.00118721	0.001	0	1
1700030J22Rik	0.385097	0.00524634	0.012	0.008	1
1700030K09Rik	0.021159	0.0207919	0.083	0.066	1
1700034H15Rik	0.87235	-0.000998539	0.002	0.002	1
1700034I23Rik	0.537471	-0.00134649	0	0.001	1
1700034P13Rik	0.131302	0.00508295	0.013	0.013	1
1700037C18Rik	0.414861	0.0102155	0.078	0.074	1
1700037F03Rik	0.592245	0.00169896	0.002	0.001	1
1700037H04Rik	0.647463	-0.00207773	0.033	0.035	1
1700040D17Rik	0.184705	0.0032201	0.004	0.001	1
1700040L08Rik	0.474982	7.83992e-06	0.001	0.001	1
1700041G16Rik	0.710847	0.00509074	0.032	0.028	1
1700041I07Rik	0.432245	0.00154552	0.006	0.005	1
1700047A11Rik	0.156116	-0.00381985	0.005	0.008	1
1700047K16Rik	0.0195137	0.00574946	0.005	0.001	1
1700047M11Rik	0.445544	0.00254697	0.004	0.002	1
1700048M11Rik	0.248212	-0.00185207	0	0.002	1
1700048O20Rik	0.813277	0.000520715	0.002	0.002	1
1700052K11Rik	0.128455	0.0100591	0.022	0.015	1
1700054A03Rik	0.0356447	0.0100809	0.015	0.009	1
1700055D18Rik	0.888652	0.0018977	0.009	0.008	1
1700056E22Rik	0.982575	0.000353565	0.003	0.003	1
1700056N10Rik	0.0455596	-0.000952696	0.009	0.008	1
1700058P15Rik	0.852502	-0.00144428	0.009	0.011	1
1700061E18Rik	0.106269	0.0060831	0.01	0.008	1
1700061G19Rik	0.888046	0.000878413	0.005	0.005	1
1700063D05Rik	0.807224	0.000182728	0.002	0.002	1
1700063J08Rik	0.714534	0.00290131	0.01	0.008	1
1700064H15Rik	0.384665	0.00423712	0.008	0.005	1
1700064M15Rik	0.70353	-0.00116527	0.002	0.002	1
1700065D16Rik	0.618058	-0.00133676	0.002	0.002	1
1700066B19Rik	0.19531	0.0149425	0.056	0.046	1
1700066M21Rik	0.411026	-0.00466646	0.034	0.035	1
1700067K01Rik	0.937194	-0.000497748	0.001	0.002	1
1700081N11Rik	0.6734	-0.00084072	0	0.001	1
1700082M22Rik	0.920879	-0.00115582	0.003	0.003	1
1700084C06Rik	0.000433024	0.0701315	0.2	0.164	1
1700084E18Rik	0.0856112	0.00642064	0.009	0.005	1
1700084F23Rik	0.98885	0.000175143	0.001	0.001	1
1700085D07Rik	0.136182	0.00204934	0.005	0.003	1
1700086O06Rik	0.316192	0.00116537	0.031	0.028	1
1700086P04Rik	0.239644	0.00190026	0.009	0.009	1
1700087M22Rik	0.484078	0.00686973	0.039	0.034	1
1700088E04Rik	0.473118	0.0025491	0.004	0.003	1
1700092C17Rik	0.334029	0.00152567	0.001	0	1
1700093J21Rik	0.527251	-0.00347041	0.007	0.009	1
1700094D03Rik	0.761872	0.00443206	0.029	0.026	1
1700094J05Rik	0.272188	0.00457602	0.009	0.006	1
1700095A21Rik	0.75121	0.000684526	0.001	0.001	1
1700095B10Rik	0.407485	0.00203446	0.002	0.001	1
1700095J07Rik	0.558911	0.00101955	0.001	0.001	1
1700095J12Rik	0.802321	0.000681085	0.001	0.001	1
1700096J18Rik	0.839639	0.00188483	0.006	0.005	1
1700096K18Rik	0.258854	0.00142387	0.05	0.046	1
1700099I09Rik	0.513984	-0.00397161	0.007	0.01	1
1700101I11Rik	0.145886	0.0013609	0.002	0.001	1
1700102H20Rik	0.764459	0.00119337	0.003	0.002	1
1700102P08Rik	0.936795	-0.000818233	0.004	0.005	1
1700105P06Rik	0.316987	0.00186405	0.001	0	1
1700108J01Rik	0.897518	-0.000984719	0.004	0.004	1
1700109G14Rik	0.784542	0.000851988	0.001	0.001	1
1700109H08Rik	0.0177424	0.013496	0.042	0.039	1
1700109K24Rik	0.384178	-0.003833	0.004	0.005	1
1700110C19Rik	0.115813	0.0215593	0.056	0.05	1
1700110K17Rik	0.704487	-0.00375467	0.011	0.013	1
1700111N16Rik	0.819002	-0.00100316	0.001	0.002	1
1700112D23Rik	0.857466	-0.000975538	0.005	0.006	1
1700112J05Rik	0.043833	-0.0032015	0	0.002	1
1700112J16Rik	0.965645	-0.000330622	0.001	0.001	1
1700112M02Rik	0.468394	0.00220709	0.003	0.002	1
1700113A16Rik	0.753852	-0.00409877	0.027	0.029	1
1700120B22Rik	0.296218	0.00203446	0.002	0.001	1
1700120C14Rik	0.334338	-0.000747318	0.014	0.013	1
1700122E12Rik	0.499686	0.00122091	0.009	0.007	1
1700123J17Rik	0.637774	0.000848664	0.001	0	1
1700123M08Rik	0.243798	-0.00431993	0.032	0.037	1
1700123O20Rik	0.378332	-0.00257274	0.126	0.124	1
1700124L16Rik	0.802321	0.000681085	0.001	0.001	1
1700126G02Rik	0.279713	0.00409448	0.022	0.018	1
1810009A15Rik	0.113551	0.0102263	0.022	0.015	1
1810010H24Rik	0.643236	-0.000957252	0.008	0.008	1
1810012K08Rik	0.752388	-0.00115582	0.003	0.004	1
1810012K16Rik	0.764459	0.00119337	0.003	0.002	1
1810013L24Rik	0.504763	0.0187611	0.242	0.233	1
1810019D21Rik	0.713419	0.000681085	0.001	0.001	1
1810019N24Rik	0.672099	0.0028957	0.008	0.006	1
1810021B22Rik	0.671168	0.00459187	0.026	0.023	1
1810024B03Rik	0.578446	0.0144067	0.1	0.093	1
1810026B05Rik	0.0990748	0.0299093	0.371	0.346	1
1810030O07Rik	0.369641	0.0173056	0.136	0.125	1
1810034E14Rik	0.0819962	0.0181426	0.032	0.024	1
1810037I17Rik	0.142093	0.0112637	0.307	0.29	1
1810041H14Rik	0.845097	-0.00132707	0.003	0.004	1
1810044D09Rik	0.266872	-0.00429372	0.024	0.025	1
1810055G02Rik	0.964454	4.28487e-05	0.008	0.007	1
1810058I24Rik	0.485046	0.015921	0.201	0.19	1
1810059C17Rik	0.976655	0.000349896	0.002	0.002	1
1810062G17Rik	0.98909	-0.000163399	0.001	0.001	1
1810062O18Rik	0.0288209	0.0199331	0.034	0.024	1
2010001A14Rik	0.124973	-0.00770049	0.014	0.019	1
2010007H06Rik	0.00389226	0.00372309	0.002	0	1
2010009K17Rik	0.624688	0.0035675	0.007	0.006	1
2010013B24Rik	0.208532	0.0215896	0.078	0.068	1
2010103J01Rik	0.486325	0.00152567	0.001	0	1
2010106C02Rik	0.6734	-0.00084072	0	0.001	1
2010109A12Rik	0.24214	0.0130503	0.039	0.032	1
2010110G14Rik	0.66951	-0.0020028	0.002	0.004	1
2010204K13Rik	0.50159	0.00127793	0.02	0.018	1
2010300C02Rik	0.112298	-0.0124024	0.018	0.025	1
2010308F09Rik	0.420194	0.00407062	0.009	0.006	1
2010310C07Rik	0.0409052	-0.00181053	0.006	0.006	1
2010315B03Rik	0.947503	0.00448393	0.178	0.175	1
2010320M18Rik	0.0254519	0.00737371	0.039	0.031	1
2010320O07Rik	0.405347	0.00625393	0.004	0.003	1
2200002D01Rik	0.642301	0.00136681	0.004	0.002	1
2210011C24Rik	0.644128	-0.00100316	0.001	0.002	1
2210016F16Rik	0.704399	0.00759056	0.157	0.151	1
2210016L21Rik	0.000957796	0.0016976	0.119	0.108	1
2210406O10Rik	0.275561	0.00424086	0.009	0.006	1
2210408F21Rik	0.18606	0.0377766	0.206	0.189	1
2210408I21Rik	0.168685	-0.0322309	0.224	0.225	1
2210409D07Rik	0.985648	-0.000143287	0.004	0.004	1
2210411M09Rik	0.0604918	0.00859607	0.011	0.006	1
2210414B05Rik	0.173243	-0.00453609	0.001	0.003	1
2210417A02Rik	0.643042	-0.00216907	0.003	0.004	1
2300009A05Rik	0.588759	-0.00609082	0.085	0.086	1
2310001H17Rik	0.269564	-0.00167368	0.022	0.025	1
2310002F09Rik	0.790503	0.00654701	0.042	0.039	1
2310008N11Rik	0.100158	-0.0131179	0.014	0.021	1
2310009A05Rik	0.325532	0.0166682	0.153	0.141	1
2310009B15Rik	0.842056	-0.00415562	0.051	0.054	1
2310010J17Rik	0.80924	0.00205483	0.05	0.048	1
2310011J03Rik	0.00470063	0.0384257	0.153	0.126	1
2310015A10Rik	0.131973	0.0228295	0.088	0.075	1
2310022A10Rik	0.0171336	0.0211657	0.053	0.042	1
2310022B05Rik	0.0128035	0.0218461	0.042	0.029	1
2310033P09Rik	0.0349049	0.0193691	0.157	0.138	1
2310034G01Rik	0.877648	-0.00132707	0.003	0.004	1
2310034O05Rik	0.924839	-0.000827209	0.002	0.002	1
2310039H08Rik	0.770411	0.00526399	0.061	0.058	1
2310040G24Rik	0.335527	0.0107907	0.12	0.11	1
2310043M15Rik	0.874037	-0.0014836	0.004	0.005	1
2310043O21Rik	0.238552	-0.00465863	0.005	0.008	1
2310047D07Rik	0.40758	-0.00636682	0.015	0.019	1
2310057M21Rik	0.719882	0.00541992	0.045	0.043	1
2310058D17Rik	0.328085	0.0114219	0.038	0.033	1
2310061I04Rik	0.842054	0.0014486	0.059	0.057	1
2310067P03Rik	0.0246479	0.0127408	0.015	0.008	1
2310068J16Rik	0.913615	-0.000277126	0.009	0.01	1
2310074N15Rik	0.276872	0.0023726	0.002	0.001	1
2410002F23Rik	0.620212	-0.0023086	0.065	0.065	1
2410003L11Rik	0.76157	0.000701658	0.005	0.004	1
2410004B18Rik	0.104785	0.0261368	0.142	0.125	1
2410006H16Rik	0.689338	0.0257618	0.366	0.359	1
2410018L13Rik	0.0968918	-0.00219085	0	0.002	1
2410021H03Rik	0.360634	0.00102595	0.002	0.002	1
2410022M11Rik	0.730457	0.00622987	0.042	0.038	1
2410080I02Rik	0.6186	-0.000330622	0.001	0.001	1
2410131K14Rik	0.0789083	0.0134485	0.033	0.026	1
2410152P15Rik	0.592487	0.00119337	0.002	0.002	1
2500002B13Rik	0.0193452	0.0109368	0.012	0.007	1
2500004C02Rik	0.791581	0.0042656	0.027	0.024	1
2510002D24Rik	0.116934	0.0164038	0.103	0.09	1
2510009E07Rik	0.00785631	-0.0641059	0.275	0.307	1
2510017J16Rik	0.609063	-0.00229113	0.008	0.01	1
2510039O18Rik	0.00624494	0.0393539	0.201	0.171	1
2510046G10Rik	0.287796	0.00293449	0.022	0.021	1
2600002D14Rik	0.322449	0.00271268	0.003	0.001	1
2600006K01Rik	0.663982	-0.00100778	0.001	0.001	1
2600014E21Rik	0.818834	0.000681085	0.001	0.001	1
2610001J05Rik	0.547917	0.0170081	0.215	0.204	1
2610002M06Rik	0.815649	-0.00600443	0.064	0.067	1
2610008E11Rik	0.804036	-0.00500683	0.155	0.156	1
2610020C07Rik	0.133359	-0.0394611	0.253	0.274	1
2610021A01Rik	0.139846	-0.0151394	0.069	0.074	1
2610027K06Rik	0.77885	-0.00358312	0.026	0.028	1
2610035D17Rik	0.000852242	-0.0411182	0.056	0.079	1
2610037D02Rik	0.0370234	0.0292279	0.19	0.168	1
2610042L04Rik	0.964305	0.00127793	0.021	0.02	1
2610044O15Rik8	0.98603	0.00180434	0.066	0.065	1
2610203C22Rik	0.0394634	-0.00869919	0.437	0.418	1
2610204G07Rik	0.762979	0.00391837	0.014	0.012	1
2610206C17Rik	0.699112	0.00170712	0.004	0.002	1
2610301B20Rik	0.738611	-0.00136868	0.06	0.06	1
2610306M01Rik	0.517432	-0.00463103	0.023	0.027	1
2610307P16Rik	0.913883	-0.00301757	0.034	0.035	1
2610316D01Rik	0.463581	-0.000163399	0.001	0.001	1
2610318N02Rik	0.202428	0.00271067	0.002	0.001	1
2610507B11Rik	0.850644	0.00749896	0.19	0.186	1
2610507I01Rik	0.240462	0.00574042	0.057	0.056	1
2610528A11Rik	0.23383	0.0210496	0.114	0.102	1
2700038G22Rik	0.967488	0.000283087	0.02	0.02	1
2700046G09Rik	0.287919	-0.000792822	0.032	0.031	1
2700049A03Rik	0.253054	0.0197323	0.134	0.127	1
2700054A10Rik	0.635433	-0.00100778	0.001	0.001	1
2700062C07Rik	0.213394	0.00972737	0.095	0.085	1
2700081O15Rik	0.545321	0.00944367	0.047	0.042	1
2700097O09Rik	0.630413	0.0139049	0.107	0.101	1
2810001G20Rik	0.450426	-0.00330928	0.024	0.024	1
2810002D19Rik	0.00433409	0.023343	0.041	0.027	1
2810004N23Rik	0.0783668	0.0249062	0.191	0.171	1
2810006K23Rik	0.011962	0.0267814	0.145	0.123	1
2810013P06Rik	0.00283002	0.0361547	0.125	0.099	1
2810021J22Rik	0.715618	-0.00463103	0.023	0.026	1
2810029C07Rik	0.377331	0.00356328	0.007	0.005	1
2810402E24Rik	0.0246434	0.0110908	0.071	0.06	1
2810403D21Rik	0.517021	-0.0176629	0.135	0.136	1
2810403G07Rik	0.27421	-0.00234079	0.002	0.004	1
2810405F17Rik	0.308833	0.00920649	0.062	0.06	1
2810407A14Rik	0.103051	-0.00521309	0.001	0.003	1
2810408A11Rik	0.937194	-0.000497748	0.001	0.002	1
2810408I11Rik	0.308031	-0.00150839	0.001	0.002	1
2810410L24Rik	0.6186	-0.000330622	0.001	0.001	1
2810414N06Rik	0.261204	0.000238948	0.012	0.013	1
2810429I04Rik	0.615839	-0.00414067	0.037	0.038	1
2810442N19Rik	0.0229656	0.00101955	0.001	0	1
2810454H06Rik	0.00376451	-0.00773649	0.047	0.046	1
2810455O05Rik	0.426487	-0.000669164	0.001	0.001	1
2810457G06Rik	0.352087	0.00288251	0.003	0.001	1
2810459M11Rik	0.449007	-0.00168016	0.001	0.002	1
2810468N07Rik	0.0212879	0.012254	0.016	0.008	1
2900005J15Rik	0.809181	0.00197552	0.029	0.027	1
2900009J06Rik	0.833995	-0.00177967	0.009	0.009	1
2900026A02Rik	0.806813	-0.00341956	0.059	0.06	1
2900040C04Rik	0.386483	0.00591635	0.008	0.005	1
2900052L18Rik	0.0348765	0.0157075	0.037	0.026	1
2900052N01Rik	0.276422	0.00541317	0.008	0.005	1
2900060B14Rik	0.467482	0.00912931	0.043	0.037	1
2900060N12Rik	0.807224	0.000182728	0.002	0.002	1
2900076A07Rik	0.579647	0.0104767	0.089	0.083	1
2900079G21Rik	0.555132	0.00135793	0.001	0.001	1
2900089D17Rik	0.0344953	-0.0328931	0.113	0.134	1
2900093K20Rik	0.0943317	0.00965866	0.071	0.061	1
2900097C17Rik	0.155467	-0.000249071	0.254	0.244	1
3010001F23Rik	0.6186	-0.000330622	0.001	0.001	1
3010003L21Rik	0.874705	-0.00176434	0.012	0.013	1
3100003L05Rik	0.0232674	0.00524376	0.004	0.001	1
3110001I22Rik	0.413691	0.00290131	0.011	0.008	1
3110009E18Rik	0.478177	-0.00662311	0.054	0.06	1
3110021N24Rik	0.309247	0.019265	0.045	0.038	1
3110039M20Rik	0.266623	-0.000155337	0.002	0.001	1
3110040N11Rik	0.688365	0.00765307	0.054	0.05	1
3110045C21Rik	0.906688	-0.000664776	0.002	0.002	1
3110056K07Rik	0.709543	0.00727037	0.157	0.157	1
3110070M22Rik	0.639186	-0.000484968	0.004	0.004	1
3110082I17Rik	0.0634673	0.0334441	0.302	0.277	1
3110082J24Rik	0.0183595	-0.000163399	0.001	0	1
3110083C13Rik	0.920559	0.000687962	0.003	0.002	1
3200001D21Rik	0.137289	0.00958019	0.013	0.008	1
3222401L13Rik	0.89317	-0.00456205	0.26	0.26	1
3300002A11Rik	0.71175	0.00116837	0.028	0.027	1
3300002I08Rik	0.185414	0.0226915	0.115	0.106	1
3300005D01Rik	0.875415	0.000698241	0.004	0.004	1
3425401B19Rik	0.674338	0.00119029	0.002	0.001	1
3632454L22Rik	0.486325	0.00152567	0.001	0	1
3830403N18Rik	7.04347e-05	-0.0478229	0.034	0.049	1
3830406C13Rik	0.884465	0.00214604	0.147	0.144	1
3830408C21Rik	0.798561	-0.000289385	0.008	0.008	1
3930402G23Rik	0.0968918	-0.00219085	0	0.002	1
4430402I18Rik	0.138041	0.0112198	0.019	0.014	1
4631405J19Rik	0.623469	0.00238159	0.004	0.003	1
4632404H12Rik	0.88538	0.00105543	0.042	0.042	1
4632411P08Rik	0.248212	-0.00185207	0	0.002	1
4632427E13Rik	0.0250479	0.0520896	0.339	0.322	1
4632428C04Rik	0.0139874	0.000911033	0.014	0.011	1
4731419I09Rik	0.286479	0.00524517	0.007	0.005	1
4732414G09Rik	0.285571	0.00220235	0.001	0	1
4732440D04Rik	0.0172906	0.0123249	0.049	0.038	1
4732465J04Rik	0.334029	0.00152567	0.001	0	1
4732471J01Rik	0.00341084	0.0644889	0.301	0.266	1
4732487G21Rik	0.289519	-0.000143287	0.004	0.005	1
4732491K20Rik	0.595719	0.00458573	0.019	0.016	1
4732496C06Rik	0.296218	0.00203446	0.002	0.001	1
4831440D22Rik	0.551989	0.0062365	0.025	0.021	1
4833403J16Rik	0.739765	-0.000484968	0.003	0.003	1
4833408A19Rik	0.561606	0.00255122	0.005	0.004	1
4833411C07Rik	0.656546	-0.00148574	0.081	0.08	1
4833413E03Rik	0.80335	0.000851988	0.002	0.001	1
4833413G10Rik	0.304069	0.00389741	0.005	0.003	1
4833417C18Rik	0.0167641	0.0185466	0.032	0.022	1
4833418N02Rik	0.295764	0.0126264	0.05	0.044	1
4833419F23Rik	0.424848	0.00256809	0.011	0.009	1
4833420G17Rik	0.0553448	0.032949	0.276	0.251	1
4833422C13Rik	0.232146	0.00624602	0.014	0.01	1
4833427F10Rik	0.870357	0.00119952	0.004	0.003	1
4833438C02Rik	0.157735	0.0142156	0.037	0.029	1
4833439L19Rik	0.0025333	0.0268832	0.222	0.194	1
4833445I07Rik	0.401307	-0.00298098	0.006	0.008	1
4921507G05Rik	0.191036	0.00288062	0.002	0.001	1
4921507P07Rik	0.624288	0.00306104	0.007	0.005	1
4921509O07Rik	0.816462	0.000687962	0.002	0.002	1
4921511C10Rik	0.292752	-0.0159521	0.066	0.068	1
4921511I17Rik	0.493761	-0.00638334	0.012	0.016	1
4921514A10Rik	0.458775	0.000513605	0.001	0.001	1
4921516A02Rik	0.611636	0.00221182	0.004	0.003	1
4921523L03Rik	0.999991	3.92272e-06	0.001	0.001	1
4921524J17Rik	0.348196	0.0158908	0.111	0.105	1
4921531C22Rik	0.0930766	0.014143	0.027	0.02	1
4921536K21Rik	0.642341	-0.000664776	0.002	0.002	1
4930402H24Rik	0.225643	0.00862057	0.128	0.118	1
4930403D09Rik	0.122982	-0.00744825	0.019	0.02	1
4930403P22Rik	0.59521	0.00221182	0.004	0.003	1
4930404A12Rik	0.0646943	-0.00133191	0.002	0.002	1
4930404I05Rik	0.638796	0.00290131	0.009	0.007	1
4930404N11Rik	0.855295	0.000772321	0.018	0.018	1
4930405A10Rik	0.987324	0.00162215	0.044	0.043	1
4930405A21Rik	0.0395026	0.00541364	0.012	0.007	1
4930405O22Rik	0.587454	0.00118721	0.001	0	1
4930406D18Rik	0.847567	0.000190293	0.004	0.003	1
4930412C18Rik	0.837321	0.00205674	0.007	0.006	1
4930412M03Rik	0.194487	-0.00251265	0.002	0.004	1
4930414N06Rik	0.0101454	-0.00266163	0.072	0.066	1
4930417H01Rik	0.431342	0.00186666	0.002	0.001	1
4930417O13Rik	0.696197	0.00203695	0.001	0.001	1
4930422I22Rik	0.426791	-0.00134649	0	0.001	1
4930422M22Rik	0.955411	-0.000656019	0.002	0.002	1
4930423D22Rik	0.127713	-0.0038594	0.002	0.004	1
4930426I24Rik	0.788064	-0.00115111	0.004	0.005	1
4930426L09Rik	0.229601	0.00406533	0.005	0.003	1
4930429F24Rik	0.184547	0.00372699	0.005	0.002	1
4930430E12Rik	0.12827	-0.0055128	0.004	0.008	1
4930430F08Rik	0.113125	0.0175656	0.056	0.047	1
4930431F10Rik	0.280579	-0.00116527	0.002	0.003	1
4930432B10Rik	0.616601	0.000728821	0.01	0.009	1
4930432K21Rik	0.464204	-0.00330537	0.007	0.008	1
4930433N12Rik	0.07078	0.00524399	0.005	0.002	1
4930444A19Rik	0.000379789	0.0800227	0.287	0.245	1
4930444P10Rik	0.664162	-0.000831706	0.001	0.002	1
4930445E18Rik	0.965107	0.000930388	0.014	0.014	1
4930445N18Rik	0.396751	0.00271469	0.004	0.002	1
4930447J18Rik	0.835981	0.000531342	0.004	0.004	1
4930447K03Rik	0.323702	0.00903423	0.028	0.022	1
4930447M23Rik	0.262393	-0.00466578	0.005	0.008	1
4930448E22Rik	0.943996	0.000342544	0.001	0.001	1
4930452B06Rik	0.0640134	-0.00117475	0	0.002	1
4930453C13Rik	0.554793	0.000194067	0.004	0.004	1
4930453N24Rik	0.0331718	0.0256219	0.129	0.109	1
4930455C13Rik	0.410748	0.0144827	0.048	0.041	1
4930469K13Rik	0.807973	-0.0010894	0.114	0.112	1
4930470G03Rik	0.460559	-0.00031819	0.002	0.003	1
4930471E19Rik	0.769447	0.00255757	0.005	0.004	1
4930473A02Rik	0.930468	0.00511632	0.07	0.068	1
4930473H19Rik	0.715823	-0.00345152	0.008	0.009	1
4930477G07Rik	0.378618	0.00254697	0.004	0.002	1
4930478M13Rik	0.22942	-0.00518175	0.03	0.031	1
4930479D17Rik	0.0463967	0.0158948	0.029	0.02	1
4930481A15Rik	0.00147753	0.0407369	0.104	0.079	1
4930481B07Rik	0.968155	2.34539e-05	0.004	0.004	1
4930484I04Rik	0.110694	-0.0228372	0.042	0.051	1
4930486L24Rik	0.0258921	0.00857521	0.018	0.011	1
4930488L21Rik	0.020741	0.00203197	0.001	0	1
4930488N15Rik	0.0579291	-0.00467295	0.003	0.007	1
4930500A05Rik	0.102557	0.00287872	0.002	0	1
4930500H12Rik	0.98885	0.000175143	0.001	0.001	1
4930500M09Rik	0.440471	0.00152567	0.001	0	1
4930502E09Rik	0.362335	-0.00184685	0.001	0.002	1
4930502E18Rik	0.604	0.00135793	0.001	0.001	1
4930503L19Rik	0.339541	0.0126547	0.047	0.041	1
4930505N22Rik	0.56006	-0.000966382	0.006	0.006	1
4930506C21Rik	0.105579	0.0156324	0.037	0.028	1
4930507D05Rik	0.3517	-0.00285679	0.001	0.002	1
4930509E16Rik	0.445012	-0.00151337	0.001	0.002	1
4930509G22Rik	0.999991	3.92272e-06	0.001	0.001	1
4930509H03Rik	0.602555	0.00829182	0.056	0.052	1
4930511M06Rik	0.023798	-0.00901579	0.023	0.024	1
4930512B01Rik	0.242332	-0.00823388	0.046	0.047	1
4930513N10Rik	0.60051	0.000865238	0.004	0.004	1
4930515G01Rik	0.230332	0.00558103	0.009	0.006	1
4930516B21Rik	0.801718	0.000517162	0.002	0.001	1
4930517O19Rik	0.274911	-0.0410615	0.294	0.306	1
4930520O04Rik	0.0256354	-0.00336777	0	0.002	1
4930522L14Rik	0.451509	0.0114241	0.062	0.055	1
4930523C07Rik	0.0795437	-0.00953108	0.012	0.018	1
4930524O07Rik	0.685186	-0.000656019	0.003	0.004	1
4930525G20Rik	0.492367	-0.00181053	0.005	0.007	1
4930532G15Rik	0.23788	-0.0048453	0.004	0.006	1
4930533B01Rik	0.263468	0.00905561	0.019	0.014	1
4930535L15Rik	0.394024	0.00220473	0.002	0.001	1
4930537H20Rik	0.805679	0.000858622	0.003	0.002	1
4930539E08Rik	0.044503	-0.00520552	0.001	0.005	1
4930539J05Rik	0.0994013	-0.0069664	0.008	0.011	1
4930544F09Rik	0.292989	-0.00368703	0.002	0.004	1
4930544I03Rik	0.914034	0.000691393	0.003	0.002	1
4930549G23Rik	0.380495	0.0149492	0.072	0.065	1
4930550C14Rik	0.802795	-0.00165475	0.004	0.005	1
4930551O13Rik	0.546997	0.000684526	0.001	0.001	1
4930555B11Rik	0.98885	0.000175143	0.001	0.001	1
4930556J02Rik	0.661225	0.00187187	0.003	0.002	1
4930556J24Rik	0.503219	-0.0127019	0.058	0.064	1
4930556M19Rik	0.455485	0.00407062	0.008	0.006	1
4930556N13Rik	0.134259	0.0105439	0.02	0.016	1
4930557J02Rik	0.721157	0.00101955	0.001	0.001	1
4930557K07Rik	0.0133528	-0.0285006	0.083	0.089	1
4930558K02Rik	0.596373	-0.00234635	0.001	0.002	1
4930562C15Rik	0.607941	-0.000998539	0.002	0.002	1
4930563E18Rik	0.713419	0.000681085	0.001	0.001	1
4930563E22Rik	0.63642	0.00289194	0.006	0.005	1
4930563I02Rik	0.406113	0.00272869	0.008	0.006	1
4930565N06Rik	0.0741072	0.0143402	0.021	0.014	1
4930567H12Rik	0.219204	-0.00290397	0.015	0.015	1
4930568A12Rik	0.659333	0.00425105	0.017	0.014	1
4930570B17Rik	0.241049	0.00574876	0.008	0.005	1
4930570G19Rik	0.75341	0.00102275	0.002	0.001	1
4930578M01Rik	0.892282	0.000322912	0.027	0.026	1
4930578M07Rik	0.0614479	0.00119645	0.002	0.002	1
4930579C12Rik	0.948414	-0.000647286	0.004	0.004	1
4930579G18Rik	0.543132	0.00558103	0.021	0.018	1
4930579G24Rik	0.437569	0.00154834	0.007	0.006	1
4930579K19Rik	0.16827	-0.000782578	0.009	0.009	1
4930579O11Rik	0.5005	-0.00317689	0.002	0.002	1
4930581F22Rik	0.109369	0.00299242	0.092	0.085	1
4930586N03Rik	0.0999446	0.00857521	0.016	0.011	1
4930588J15Rik	0.240759	0.00321845	0.002	0.001	1
4930589L23Rik	0.796156	-0.00303804	0.017	0.019	1
4930590J08Rik	0.18295	-0.00283317	0.003	0.006	1
4930592I03Rik	0.583784	-0.00184164	0.002	0.003	1
4930593A02Rik	0.701048	-0.00376764	0.01	0.012	1
4930594M22Rik	0.137085	-0.00904549	0.012	0.015	1
4930594M22Rik.1	0.122664	-0.00286272	0	0.002	1
4930595D18Rik	0.994081	-0.00141927	0.043	0.044	1
4930599N23Rik	0.492798	0.00910548	0.142	0.133	1
4931403E22Rik	0.263189	0.00162844	0.022	0.019	1
4931406C07Rik	0.26261	-0.000967754	0.226	0.218	1
4931406G06Rik	0.704078	0.00119029	0.002	0.001	1
4931406P16Rik	0.00566564	0.0548118	0.266	0.233	1
4931407E12Rik	0.999991	3.92272e-06	0.001	0.001	1
4931413K12Rik	0.998476	-0.000123317	0.007	0.007	1
4931414P19Rik	0.0567948	0.0142228	0.05	0.039	1
4931415C17Rik	0.510212	0.000353565	0.003	0.002	1
4931422A03Rik	0.445256	0.0124688	0.1	0.097	1
4931423N10Rik	0.802321	0.000681085	0.001	0.001	1
4931428F04Rik	0.469525	0.00159017	0.016	0.014	1
4931431B13Rik	0.647319	-0.00117475	0.001	0.002	1
4931431C16Rik	0.75088	7.83992e-06	0.001	0.001	1
4931440F15Rik	0.864293	0.000855307	0.002	0.002	1
4932412D23Rik	0.0645316	0.00254484	0.004	0.001	1
4932414N04Rik	0.85272	-0.000669164	0.001	0.001	1
4932422M17Rik	0.331527	-0.00110431	0.01	0.01	1
4932438A13Rik	0.190621	0.0058987	0.372	0.357	1
4932441J04Rik	0.19621	-0.00168527	0	0.001	1
4932443L11Rik	0.189716	0.00558103	0.016	0.016	1
4933400F21Rik	0.824778	0.000360887	0.004	0.004	1
4933401H06Rik	0.98885	0.000175143	0.001	0.001	1
4933404O12Rik	0.458088	0.00390328	0.007	0.006	1
4933405D12Rik	0.0273985	0.00102275	0.002	0.001	1
4933406C10Rik	0.164945	0.00424736	0.014	0.011	1
4933406I18Rik	0.332607	0.0337738	0.861	0.857	1
4933406J10Rik	0.796843	-0.00197104	0.006	0.007	1
4933406P04Rik	0.370218	0.00305398	0.005	0.003	1
4933407K13Rik	0.680716	0.00703122	0.045	0.041	1
4933407L21Rik	0.98909	-0.000163399	0.001	0.001	1
4933408B17Rik	0.506973	0.00390211	0.007	0.005	1
4933408J17Rik	0.587454	0.00118721	0.001	0	1
4933411E06Rik	0.926806	0.000360887	0.004	0.004	1
4933411E08Rik	0.42259	-0.000493482	0.002	0.002	1
4933412E12Rik	0.170026	0.00622943	0.041	0.035	1
4933413J09Rik	0.587454	0.00118721	0.001	0	1
4933417D19Rik	0.965685	0.000711879	0.007	0.006	1
4933421O10Rik	0.396084	0.0117816	0.105	0.095	1
4933423P22Rik	0.0961969	-0.0325726	0.075	0.088	1
4933424G05Rik	0.43842	0.0030628	0.007	0.005	1
4933424G06Rik	0.669792	0.00102595	0.003	0.002	1
4933424L21Rik	0.331301	-0.00179507	0.008	0.008	1
4933424M12Rik	0.610061	-0.00312328	0.026	0.027	1
4933426K07Rik	0.452724	-0.00116055	0.002	0.003	1
4933427D06Rik	0.102557	0.00287872	0.002	0	1
4933427D14Rik	0.244151	0.00507668	0.007	0.004	1
4933429H19Rik	0.362738	-0.00185207	0	0.001	1
4933430I17Rik	0.75088	7.83992e-06	0.001	0.001	1
4933431E20Rik	0.703907	-0.00281554	0.005	0.007	1
4933431G14Rik	0.87877	0.000349896	0.002	0.002	1
4933432I03Rik	0.363687	-0.00367128	0.019	0.023	1
4933432K03Rik	0.530755	0.00237935	0.004	0.002	1
4933433G15Rik	0.524499	0.00687667	0.041	0.038	1
4933433G19Rik	0.309463	0.00474792	0.013	0.012	1
4933433H22Rik	0.469578	0.00118721	0.001	0	1
4933434E20Rik	0.175079	0.0297038	0.284	0.264	1
4933436I20Rik	0.183363	0.00136681	0.001	0.002	1
4933439C10Rik	0.0787483	0.0167591	0.045	0.035	1
4933439K11Rik	0.868331	0.00258478	0.015	0.014	1
5031415H12Rik	0.00676463	0.00304688	0.002	0	1
5031425E22Rik	0.153483	0.0242817	0.206	0.188	1
5031425F14Rik	0.908072	-0.000591113	0.013	0.013	1
5031434O11Rik	0.22012	-0.00660495	0.01	0.013	1
5031439G07Rik	0.845373	0.00506935	0.243	0.238	1
5033403F01Rik	0.959979	2.34539e-05	0.004	0.004	1
5033406O09Rik	0.540225	1.17516e-05	0.002	0.002	1
5033417F24Rik	0.570392	-0.000330622	0.001	0.001	1
5033421B08Rik	0.205038	-0.0166726	0.038	0.046	1
5033430I15Rik	0.665791	-0.000984719	0.004	0.004	1
5330417C22Rik	0.292747	-0.00452192	0.003	0.005	1
5330426L24Rik	0.850174	-0.00044695	0.008	0.009	1
5330434G04Rik	0.798613	0.000178938	0.002	0.002	1
5330438D12Rik	0.186845	0.0289008	0.522	0.529	1
5330439K02Rik	0.49057	0.00141933	0.016	0.014	1
5430400D12Rik	0.582409	-0.0014836	0.004	0.005	1
5430401F13Rik	0.0367055	0.0016935	0.001	0	1
5430402O13Rik	0.497916	-0.00399624	0.018	0.021	1
5430403G16Rik	0.304045	-0.00587988	0.041	0.043	1
5430405H02Rik	0.87965	-0.0101922	0.177	0.18	1
5430414B19Rik	0.754104	-0.00149845	0.003	0.004	1
5430416N02Rik	0.431976	0.0078661	0.036	0.031	1
5430425K12Rik	0.539081	0.00169896	0.002	0.001	1
5430427M07Rik	0.0786599	0.0035675	0.007	0.006	1
5430427O19Rik	0.670227	0.00088104	0.188	0.185	1
5430431A17Rik	0.191179	-0.00814878	0.017	0.02	1
5530601H04Rik	0.0118738	0.0172283	0.153	0.135	1
5730405O15Rik	0.0849962	-0.00845503	0.008	0.014	1
5730409E04Rik	0.0521908	0.0221018	0.064	0.052	1
5730414N17Rik	0.712688	0.0023883	0.007	0.005	1
5730420D15Rik	0.463581	-0.000163399	0.001	0.001	1
5730435O14Rik	0.302482	0.00406639	0.006	0.003	1
5730455P16Rik	0.835596	0.00437224	0.098	0.094	1
5730480H06Rik	0.706407	0.00542937	0.096	0.091	1
5730507C01Rik	0.875497	-0.000831706	0.002	0.002	1
5730522E02Rik	0.628939	0.012619	0.017	0.015	1
5830408C22Rik	0.353504	0.0102928	0.038	0.033	1
5830416I19Rik	0.607941	-0.000998539	0.002	0.002	1
5830428M24Rik	0.31753	-0.00250131	0.004	0.005	1
5830432E09Rik	0.879131	0.000879319	0.038	0.037	1
5830444B04Rik	0.975973	-0.00216309	0.053	0.054	1
5830448L01Rik	0.470419	0.000769002	0.018	0.017	1
5830454E08Rik	0.268985	-0.000119339	0.008	0.007	1
5830487J09Rik	0.916594	0.000513605	0.001	0.001	1
5930403N24Rik	0.177712	-0.00590267	0.012	0.017	1
5930430L01Rik	0.377638	-0.000256808	0.012	0.013	1
6030442K20Rik	0.211044	0.014741	0.042	0.037	1
6030443J06Rik	0.329012	0.00441454	0.012	0.008	1
6030458C11Rik	0.125551	-0.00559751	0.113	0.111	1
6030468B19Rik	0.328855	0.0166292	0.088	0.079	1
6230400D17Rik	0.0538581	0.00428685	0.042	0.037	1
6330403K07Rik	0.905836	-0.00317712	0.018	0.019	1
6330403L08Rik	0.0230681	0.010648	0.035	0.026	1
6330408M09Rik	0.171779	-0.00144428	0.01	0.012	1
6330409D20Rik	0.0446837	-0.00403866	0.001	0.003	1
6330415G19Rik	0.98824	0.000194067	0.004	0.004	1
6330418K02Rik	0.333168	0.0141127	0.082	0.073	1
6330562C20Rik	0.718505	-0.00549413	0.03	0.033	1
6430531B16Rik	0.887896	-0.00050202	0.001	0.001	1
6430548M08Rik	0.965282	0.00113611	0.056	0.056	1
6430550D23Rik	0.579077	0.00574566	0.025	0.022	1
6430562O15Rik	0.667156	0.00153136	0.003	0.002	1
6430571L13Rik	0.526043	0.00135793	0.002	0.001	1
6430573P05Rik	0.905511	-0.000827209	0.003	0.003	1
6430590A07Rik	0.542611	0.00925954	0.05	0.045	1
6530401F13Rik	0.438158	-0.00285087	0.001	0.003	1
6530402F18Rik	0.468235	-0.000642928	0.005	0.006	1
6530403H02Rik	0.419177	-0.00168016	0.001	0.002	1
6530409C15Rik	0.625226	0.0123894	0.082	0.075	1
6530413G14Rik	0.757308	0.000855307	0.002	0.002	1
6530437J22Rik	0.323206	-0.00233524	0.003	0.004	1
6720427I07Rik	0.504917	0.0137428	0.144	0.134	1
6720489N17Rik	0.564514	-0.00536738	0.016	0.018	1
6820408C15Rik	0.350846	0.0032201	0.003	0.001	1
8030423F21Rik	0.999991	3.92272e-06	0.001	0.001	1
8030423J24Rik	0.19621	-0.00168527	0	0.001	1
8030442B05Rik	0.00554394	0.0792144	0.719	0.704	1
8030453O22Rik	0.924381	0.000721833	0.037	0.036	1
8030456M14Rik	0.026935	0.00807575	0.018	0.012	1
8030462N17Rik	0.443662	0.00508721	0.254	0.244	1
8030474K03Rik	0.604	0.00135793	0.001	0.001	1
8430422H06Rik	0.819002	-0.00100316	0.001	0.002	1
8430426J06Rik	0.697056	-0.00150342	0.002	0.003	1
8430429K09Rik	0.904139	-0.000910295	0.035	0.035	1
8430432A02Rik	0.580264	0.00186927	0.003	0.002	1
9030025P20Rik	0.40289	-0.00676032	0.023	0.026	1
9030404E10Rik	0.481617	0.00169623	0.002	0.001	1
9030407P20Rik	0.251478	0.00674819	0.015	0.011	1
9030624G23Rik	0.965645	-0.000330622	0.001	0.001	1
9130015G15Rik	0.115309	0.0368221	0.165	0.148	1
9130019O22Rik	0.811125	0.00257437	0.013	0.011	1
9130019P16Rik	0.358018	0.0215689	0.063	0.055	1
9130023H24Rik	0.168752	-0.00352744	0.019	0.02	1
9130024F11Rik	0.0254411	-0.00603941	0.002	0.005	1
9130213A22Rik	0.0930492	0.00389387	0.004	0.001	1
9130221H12Rik	0.451809	-0.00225836	0.012	0.013	1
9130230L23Rik	0.592487	0.00119337	0.002	0.002	1
9130230N09Rik	0.824041	0.000209111	0.007	0.007	1
9130401M01Rik	0.110947	0.00432076	0.069	0.062	1
9130604C24Rik	0.94066	-0.000970956	0.006	0.007	1
9230104M06Rik	0.723827	0.0015342	0.004	0.002	1
9230111E07Rik	0.76395	0.000224071	0.009	0.009	1
9230112E08Rik	0.59521	0.00221182	0.004	0.003	1
9230114K14Rik	0.868298	-0.00190832	0.014	0.014	1
9230116L04Rik	0.431342	0.00186666	0.002	0.001	1
9230116N13Rik	0.248643	0.00741472	0.016	0.011	1
9330020H09Rik	0.968489	-0.000920984	0.013	0.013	1
9330102E08Rik	0.244278	-0.00269045	0.001	0.002	1
9330104G04Rik	0.170512	0.00491157	0.012	0.008	1
9330111N05Rik	0.474967	0.00322835	0.006	0.005	1
9330136K24Rik	0.496979	0.00591311	0.019	0.015	1
9330151L19Rik	0.418778	-0.00804566	0.025	0.03	1
9330159F19Rik	0.949101	0.00122395	0.007	0.007	1
9330159M07Rik	0.479321	-0.0127496	0.063	0.069	1
9330160F10Rik	0.339579	-0.00325953	0.044	0.043	1
9330162012Rik	0.802321	0.000681085	0.001	0.001	1
9330175E14Rik	0.569847	1.56579e-05	0.003	0.002	1
9330179D12Rik	0.334029	0.00152567	0.001	0	1
9330182L06Rik	0.423546	0.00220709	0.003	0.001	1
9330185C12Rik	0.384918	0.00186405	0.001	0	1
9330198N18Rik	0.98909	-0.000163399	0.001	0.001	1
9430015G10Rik	0.295931	0.0121669	0.05	0.042	1
9430018G01Rik	0.419177	-0.00168016	0.001	0.002	1
9430037G07Rik	0.181879	0.0040632	0.003	0.001	1
9430038I01Rik	0.0727707	0.0114753	0.081	0.069	1
9430041J12Rik	0.580955	-0.0018928	0.016	0.016	1
9430060I03Rik	0.200004	0.00725101	0.015	0.01	1
9430065F17Rik	0.96685	-0.000155337	0.002	0.002	1
9430085M18Rik	0.89005	0.000684526	0.002	0.001	1
9430091E24Rik	0.521705	0.00752144	0.042	0.039	1
9530018F02Rik	0.868676	0.00122395	0.009	0.008	1
9530026P05Rik	0.365419	-0.00183644	0.002	0.002	1
9530034E10Rik	0.18398	0.00475593	0.024	0.019	1
9530036M11Rik	0.609585	0.00156518	0.009	0.008	1
9530036O11Rik	0.999991	3.92272e-06	0.001	0.001	1
9530046B11Rik	0.887896	-0.00050202	0.001	0.001	1
9530052C20Rik	0.818166	0.000513605	0.001	0.001	1
9530052E02Rik	0.252678	-0.00513044	0.008	0.009	1
9530059O14Rik	0.248212	-0.00185207	0	0.002	1
9530062K07Rik	0.00484553	-0.0205082	0.052	0.056	1
9530068E07Rik	0.506772	0.00845623	0.241	0.232	1
9530077C05Rik	0.823441	0.000527805	0.004	0.004	1
9530082P21Rik	0.0790798	0.00524819	0.017	0.012	1
9530097N15Rik	0.715385	0.0015427	0.005	0.004	1
9630001P10Rik	0.158441	-0.00235748	0	0.001	1
9630013K17Rik	0.149617	-0.00269626	0	0.001	1
9630014M24Rik	0.647626	-0.00083621	0.001	0.001	1
9630015K15Rik	0.784542	0.000851988	0.001	0.001	1
9630028H03Rik	0.431801	0.000346223	0.001	0.001	1
9630028I04Rik	0.1528	0.0095014	0.035	0.027	1
9830144P21Rik	0.25269	-0.00235748	0	0.001	1
9930012K11Rik	0.265456	0.00356328	0.006	0.005	1
9930014A18Rik	0.637566	-0.000989319	0.003	0.004	1
9930021J03Rik	0.904415	-0.000932275	0.408	0.407	1
9930022D16Rik	0.265053	-0.00516785	0.005	0.008	1
9930104L06Rik	0.48311	-0.000764679	0.06	0.058	1
9930111J21Rik1	0.6101	0.00199021	0.034	0.034	1
9930111J21Rik2	0.551305	-0.0129445	0.415	0.413	1
a	0.316273	0.00823549	0.017	0.014	1
A030001D20Rik	0.817765	0.000349896	0.002	0.002	1
A130010J15Rik	0.984984	0.00123919	0.047	0.046	1
A130014A01Rik	0.0767702	0.0185546	0.057	0.046	1
A130051J06Rik	0.975355	-0.000123317	0.007	0.007	1
A130077B15Rik	0.379541	-0.00964801	0.038	0.042	1
A230001M10Rik	0.598676	-0.00134162	0.001	0.002	1
A230004M16Rik	0.278468	-0.00134162	0.001	0.002	1
A230005M16Rik	0.679461	-0.000642928	0.005	0.005	1
A230006K03Rik	0.999991	3.92272e-06	0.001	0.001	1
A230009B12Rik	0.939966	0.000861932	0.003	0.002	1
A230020J21Rik	0.440471	0.00152567	0.001	0	1
A230056P14Rik	0.355624	0.0142355	0.063	0.055	1
A230057D06Rik	0.0841727	-0.0048599	0.002	0.006	1
A230060F14Rik	0.463581	-0.000163399	0.001	0.001	1
A230072C01Rik	0.0404997	0.01593	0.029	0.021	1
A230072E10Rik	0.172228	0.00841983	0.013	0.008	1
A230083G16Rik	0.227343	-0.00983498	0.023	0.026	1
A230083N12Rik	0.346402	-0.00177456	0.01	0.01	1
A230087F16Rik	0.55399	0.00152852	0.001	0.001	1
A230103J11Rik	0.020741	0.00237035	0.001	0	1
A230107N01Rik	0.119599	0.00338964	0.004	0.002	1
A230108P19Rik	0.154759	-0.000998539	0.002	0.002	1
A2ml1	0.155007	-0.00453609	0.001	0.003	1
A330008L17Rik	0.764338	0.00102275	0.002	0.001	1
A330009N23Rik	0.483034	1.56579e-05	0.002	0.003	1
A330015K06Rik	0.331702	-0.00352117	0.002	0.003	1
A330023F24Rik	0.919111	0.00722701	0.166	0.162	1
A330032B11Rik	0.809151	0.00107339	0.012	0.012	1
A330035P11Rik	0.153188	-0.0048453	0.004	0.007	1
A330040F15Rik	0.00740835	0.0211285	0.083	0.065	1
A330041J22Rik	0.18073	-0.00219085	0	0.001	1
A330048O09Rik	0.637774	0.000848664	0.001	0	1
A330076H08Rik	0.0326218	0.00203446	0.002	0	1
A330084C13Rik	0.719907	-0.0018157	0.004	0.005	1
A330102I10Rik	0.174975	-0.00302907	0.001	0.002	1
A3galt2	0.152566	-0.00334896	0.003	0.004	1
A430005L14Rik	0.86702	0.00146231	0.097	0.095	1
A430010J10Rik	0.583156	-0.00050202	0.001	0.001	1
A430018G15Rik	0.979854	-0.00131947	0.026	0.027	1
A430033K04Rik	0.139593	-0.00333435	0.053	0.051	1
A430035B10Rik	0.493006	0.00142795	0.017	0.017	1
A430057M04Rik	0.526585	0.00186927	0.003	0.002	1
A430073D23Rik	0.818999	0.00138198	0.043	0.041	1
A430078I02Rik	0.960554	-0.000297587	0.006	0.006	1
A430090L17Rik	0.331066	0.0112276	0.038	0.031	1
A430093F15Rik	0.201406	-0.00162427	0.027	0.025	1
A430105J06Rik	0.860501	-0.00109503	0.012	0.012	1
A430106G13Rik	0.581435	-0.000135282	0.005	0.004	1
A430110L20Rik	0.327032	-0.00262135	0.009	0.011	1
A4galt	0.309669	0.00220235	0.001	0	1
A530010L16Rik	0.0850087	0.000691393	0.003	0.002	1
A530013C23Rik	0.0195635	0.0085526	0.026	0.019	1
A530017D24Rik	0.524851	0.00208282	0.055	0.052	1
A530032D15Rik	0.243925	0.0015342	0.003	0.002	1
A530040E14Rik	0.822288	0.000520715	0.003	0.002	1
A530041M06Rik	0.463308	-0.00368401	0.02	0.021	1
A530064D06Rik	0.818834	0.000681085	0.001	0.001	1
A530072M11Rik	0.669903	-0.0113117	0.101	0.106	1
A530083I20Rik	0.463581	-0.000163399	0.001	0.001	1
A530088E08Rik	0.00427245	0.0355407	0.077	0.059	1
A630001G21Rik	0.0241863	0.00438526	0.427	0.404	1
A630001O12Rik	0.820198	-0.00110227	0.031	0.031	1
A630009H07Rik	0.452347	0.00220709	0.003	0.002	1
A630019I02Rik	0.98909	-0.000163399	0.001	0.001	1
A630023P12Rik	0.999991	3.92272e-06	0.001	0.001	1
A630052C17Rik	0.848603	0.00209566	0.018	0.016	1
A630072M18Rik	0.643495	0.00234991	0.04	0.038	1
A630089N07Rik	0.541938	-0.014584	0.073	0.08	1
A730011C13Rik	0.401808	-0.00267886	0.002	0.004	1
A730017L22Rik	0.071361	0.00756685	0.023	0.017	1
A730020E08Rik	0.19621	-0.00168527	0	0.001	1
A730056A06Rik	0.999991	3.92272e-06	0.001	0.001	1
A730061H03Rik	0.749332	0.00274059	0.012	0.011	1
A730063M14Rik	0.166266	0.00906761	0.02	0.014	1
A730071L15Rik	0.624634	-0.00031819	0.003	0.003	1
A730081D07Rik	0.198287	0.0209911	0.066	0.056	1
A730085K08Rik	0.786643	-0.00117001	0.001	0.002	1
A730090N16Rik	0.411576	-0.000484968	0.003	0.003	1
A830005F24Rik	0.526043	0.00135793	0.002	0.001	1
A830008E24Rik	0.000483587	0.103903	0.431	0.397	1
A830009L08Rik	0.131999	0.00338656	0.003	0.001	1
A830018L16Rik	0.19495	-0.00631928	0.006	0.01	1
A830021F12Rik	0.424458	0.000242654	0.012	0.013	1
A830035O19Rik	0.0562251	0.00659097	0.006	0.002	1
A830052D11Rik	0.844543	0.000548955	0.008	0.008	1
A830082K12Rik	0.769054	-0.00197104	0.006	0.007	1
A830082N09Rik	0.652447	-0.00180021	0.007	0.007	1
A930001A20Rik	0.637774	0.000848664	0.001	0	1
A930001M01Rik	0.388579	0.0157312	0.081	0.072	1
A930002C04Rik	0.546928	0.00152852	0.002	0.001	1
A930004D18Rik	0.6734	-0.00084072	0	0.001	1
A930005H10Rik	0.628893	-0.00711727	0.042	0.047	1
A930006K02Rik	0.256015	0.00884875	0.035	0.028	1
A930006L05Rik	0.274071	0.00271268	0.003	0.001	1
A930007I19Rik	0.27012	0.00254186	0.092	0.095	1
A930012O16Rik	0.647319	-0.00117475	0.001	0.002	1
A930014D07Rik	0.491606	0.00107026	0.012	0.01	1
A930015D03Rik	0.204532	0.028402	0.203	0.191	1
A930019D19Rik	0.687122	-0.00100316	0.001	0.001	1
A930023M06Rik	0.385928	-0.000984719	0.004	0.005	1
A930024E05Rik	0.112435	0.0200901	0.069	0.057	1
A930029G22Rik	0.934815	0.00112292	0.022	0.021	1
A930033H14Rik	0.677871	0.00623472	0.032	0.029	1
A930033M14Rik	0.98909	-0.000163399	0.001	0.001	1
A930037H05Rik	0.207528	-0.0081627	0.062	0.07	1
A930041C12Rik	0.40838	0.00440394	0.005	0.003	1
AA386476	0.629729	-0.00673503	0.024	0.028	1
AA388235	0.021643	0.0118817	0.022	0.013	1
AA465934	0.00295717	-0.0140523	0.01	0.019	1
AA467197	0.887896	-0.000669164	0.001	0.001	1
AA645442	0.37409	0.000346223	0.002	0.001	1
AA986860	0.0936342	-0.00249001	0.004	0.007	1
Aaas	0.858419	-0.000597543	0.035	0.035	1
Aacs	0.27205	0.0104932	0.032	0.026	1
Aagab	0.483921	0.0217535	0.302	0.29	1
Aak1	0.262762	-0.0105776	0.352	0.346	1
Aamdc	0.633631	-0.000920267	0.121	0.118	1
Aamp	0.0195331	0.00631059	0.301	0.282	1
Aar2	0.412255	0.00728369	0.081	0.074	1
Aars	0.249923	0.0109174	0.215	0.202	1
Aars2	0.495405	0.00524911	0.019	0.016	1
Aarsd1	0.456529	0.00644311	0.152	0.144	1
Aasdh	0.981913	1.72188e-05	0.052	0.052	1
Aasdhppt	0.194113	-0.0149608	0.094	0.1	1
Aass	0.670302	0.00101955	0.001	0.001	1
Aatf	0.0129198	0.0357041	0.278	0.248	1
Aatk	0.110681	0.0088071	0.046	0.038	1
AB124611	0.852256	-0.000930014	0.011	0.012	1
Abat	0.417626	-0.000115367	0.008	0.007	1
Abca13	0.828589	0.000246355	0.012	0.012	1
Abca14	0.522525	-0.00116055	0.003	0.003	1
Abca17	0.923549	0.00121177	0.006	0.005	1
Abca2	0.167182	0.0150677	0.05	0.041	1
Abca3	0.00365376	0.0119824	0.194	0.173	1
Abca4	0.0367055	0.00237035	0.001	0	1
Abca5	0.492152	0.00408109	0.014	0.011	1
Abca6	0.710242	0.0027267	0.007	0.005	1
Abca7	0.359361	0.010421	0.074	0.066	1
Abca8a	0.0887875	0.00524447	0.006	0.003	1
Abca8b	0.409891	-0.00251833	0.001	0.002	1
Abca9	0.382004	0.0254728	0.883	0.878	1
Abcb10	0.603784	-0.0089694	0.056	0.061	1
Abcb1a	0.14713	0.0079136	0.012	0.008	1
Abcb1b	0.260259	0.0287724	0.235	0.224	1
Abcb4	0.0391386	0.0356448	0.242	0.216	1
Abcb6	0.655365	-0.00297317	0.025	0.026	1
Abcb7	0.555836	0.00902176	0.29	0.279	1
Abcb8	0.045621	0.0157974	0.044	0.036	1
Abcb9	0.0435093	0.00324792	0.015	0.012	1
Abcc1	0.174087	-0.000197366	0.157	0.15	1
Abcc10	0.395108	0.0102864	0.041	0.035	1
Abcc3	0.661795	-0.0168313	0.423	0.43	1
Abcc4	0.0725067	0.0308208	0.148	0.129	1
Abcc5	0.527198	0.0238103	0.352	0.342	1
Abcc8	0.887896	-0.00050202	0.001	0.001	1
Abcc9	0.140401	0.00591752	0.005	0.002	1
Abcd1	0.558152	0.0122718	0.181	0.171	1
Abcd2	0.0991806	-0.00404981	0.411	0.397	1
Abcd3	0.026513	0.0480126	0.256	0.231	1
Abcd4	0.395826	-0.00125198	0.074	0.079	1
Abce1	0.165063	-0.00030207	0.207	0.2	1
Abcf1	0.101801	0.02904	0.285	0.262	1
Abcf2	0.0101925	0.0304207	0.118	0.095	1
Abcf3	0.0494818	0.0175308	0.096	0.081	1
Abcg2	0.0356807	0.0482031	0.286	0.269	1
Abcg3	0.0506477	-0.00222662	0.064	0.059	1
Abhd10	0.473132	0.000901511	0.072	0.068	1
Abhd11	0.853333	0.00332607	0.047	0.045	1
Abhd12	0.55472	0.00170108	0.983	0.979	1
Abhd13	0.316315	0.00851318	0.085	0.082	1
Abhd14a	0.221309	0.0087393	0.069	0.061	1
Abhd14b	0.0323843	0.0116758	0.054	0.043	1
Abhd15	0.000253429	0.0814029	0.406	0.363	1
Abhd16a	0.178	0.00658107	0.157	0.147	1
Abhd17a	0.000165362	0.0309944	0.188	0.157	1
Abhd17b	0.417926	0.0144351	0.205	0.192	1
Abhd17c	0.308565	0.0147751	0.25	0.236	1
Abhd18	0.31889	0.0146648	0.113	0.103	1
Abhd2	0.87006	0.00365556	0.114	0.114	1
Abhd3	0.725875	0.000116881	0.044	0.043	1
Abhd4	0.210943	0.017337	0.103	0.09	1
Abhd5	0.734527	0.00837786	0.079	0.075	1
Abhd6	0.0987565	0.0417087	0.334	0.313	1
Abhd8	0.0606	0.00994769	0.044	0.035	1
Abi1	0.573762	-0.0176544	0.716	0.715	1
Abi2	0.148565	-0.00612281	0.168	0.163	1
Abi3	0.640104	0.0120966	0.808	0.803	1
Abi3bp	0.612095	0.000371831	0.005	0.005	1
Abitram	0.145733	0.0149734	0.045	0.036	1
Abl1	0.16542	0.0307644	0.424	0.401	1
Abl2	0.950462	-0.0117143	0.409	0.411	1
Ablim1	0.407503	0.0245085	0.189	0.177	1
Ablim2	0.211111	-0.00695768	0.008	0.012	1
Ablim3	0.6734	-0.00084072	0	0.001	1
Abr	0.507066	0.0127776	0.379	0.367	1
Abra	0.947878	1.17516e-05	0.002	0.002	1
Abracl	0.421337	0.0175723	0.278	0.264	1
Abraxas1	0.358877	0.0134638	0.064	0.057	1
Abraxas2	0.122541	0.0163503	0.269	0.251	1
Abt1	0.610215	0.00749062	0.061	0.055	1
Abtb1	0.463854	0.0115855	0.09	0.084	1
Abtb2	0.243207	-0.00213662	0.006	0.006	1
AC106834.1	0.943996	0.000342544	0.001	0.001	1
AC109619.1	0.887896	-0.00050202	0.001	0.001	1
AC113595.1	0.260684	-0.00787612	0.025	0.031	1
AC125149.3	0.426791	-0.00134649	0	0.001	1
AC132307.1	0.318762	0.00723949	0.021	0.016	1
AC142100.1	0.98909	-0.000163399	0.001	0.001	1
AC154200.1	0.0905391	-0.00769132	0.014	0.019	1
AC156546.1	0.558911	0.00101955	0.001	0.001	1
AC160336.1	0.816725	-0.000885117	0.019	0.019	1
AC163638.2	0.98885	0.000175143	0.001	0.001	1
AC166172.1	0.358746	0.00738964	0.026	0.023	1
AC241534.1	0.517267	0.00339577	0.007	0.005	1
Acaa1a	0.0798097	0.0302431	0.21	0.188	1
Acaa2	0.206188	0.0157376	0.095	0.083	1
Acaca	0.172193	0.00613084	0.152	0.141	1
Acacb	0.481617	0.00169623	0.002	0.001	1
Acad10	0.0607549	0.0138377	0.059	0.048	1
Acad11	0.59342	0.00814014	0.051	0.046	1
Acad12	0.0169578	0.0197062	0.077	0.061	1
Acad8	0.390477	0.0104091	0.104	0.095	1
Acad9	0.135089	0.00828286	0.059	0.057	1
Acadl	0.473764	0.00457432	0.146	0.139	1
Acadm	0.070723	0.025741	0.254	0.231	1
Acads	0.0612626	0.0368654	0.262	0.238	1
Acadsb	0.394861	0.00885616	0.186	0.176	1
Acadvl	0.194686	0.0144277	0.086	0.075	1
Acap2	0.238972	0.0184406	0.838	0.839	1
Acap3	0.747296	-0.00397	0.022	0.024	1
Acat1	0.0119232	0.0171259	0.211	0.19	1
Acat2	0.0261772	0.0179008	0.046	0.034	1
Acat3	0.818834	0.000681085	0.001	0.001	1
Acbd3	0.172803	-0.00104051	0.331	0.319	1
Acbd4	0.334812	0.00673936	0.023	0.019	1
Acbd5	0.759561	0.0102125	0.29	0.282	1
Acbd6	0.053056	0.0463809	0.28	0.256	1
Accs	0.000912396	0.0585212	0.214	0.182	1
Acd	0.0404293	0.0175698	0.044	0.033	1
Acer2	0.0790818	0.00458504	0.017	0.013	1
Acer3	0.0491243	-0.039743	0.652	0.68	1
Ache	0.627624	-0.00511601	0.024	0.026	1
Acin1	0.030518	0.0409963	0.472	0.44	1
Ackr1	0.052947	-0.00470891	0.001	0.003	1
Ackr2	0.0367055	0.00203197	0.001	0	1
Ackr3	0.00264349	0.0201105	0.02	0.01	1
Ackr4	0.0579854	0.0049194	0.02	0.015	1
Acly	0.00171152	0.0243869	0.268	0.239	1
Aco1	0.109272	1.1646e-05	0.105	0.098	1
Aco2	0.334611	0.00093716	0.243	0.236	1
Acot1	0.0135091	0.0104372	0.013	0.006	1
Acot11	0.336802	0.00625019	0.011	0.007	1
Acot13	0.0325169	-0.030115	0.205	0.213	1
Acot2	0.92402	-0.00259846	0.03	0.031	1
Acot6	0.453867	0.00256809	0.01	0.008	1
Acot7	0.406229	0.00232144	0.033	0.034	1
Acot8	0.324424	0.0137142	0.076	0.069	1
Acot9	0.46093	0.0133881	0.093	0.085	1
Acox1	0.144318	0.0168474	0.193	0.178	1
Acox3	0.599126	0.0123931	0.279	0.274	1
Acoxl	0.394024	0.00220473	0.002	0.001	1
Acp1	0.0200855	0.0271943	0.184	0.161	1
Acp2	0.46464	0.0171494	0.355	0.342	1
Acp5	0.505331	-0.00201345	0.001	0.002	1
Acp6	0.836372	0.0057356	0.081	0.077	1
Acpp	0.798139	0.000342544	0.001	0.001	1
Acrbp	0.640812	0.00430994	0.057	0.053	1
Acsbg1	0.15381	0.00758896	0.012	0.007	1
Acsf2	0.0519529	-0.00320666	0.054	0.052	1
Acsf3	0.503811	0.00558103	0.027	0.025	1
Acsl1	0.663717	0.00981181	0.21	0.202	1
Acsl3	0.361746	0.0114667	0.056	0.048	1
Acsl4	0.668639	-0.0176464	0.344	0.349	1
Acsl5	0.856996	0.00392371	0.185	0.181	1
Acsl6	0.468151	0.00624556	0.017	0.014	1
Acsm3	0.818166	0.000513605	0.001	0.001	1
Acss1	0.429603	0.025914	0.367	0.353	1
Acss2	0.213719	-0.0022151	0.016	0.014	1
Acta1	0.887896	-0.00050202	0.001	0.001	1
Acta2	0.042287	0.0146697	0.023	0.015	1
Actb	0.00017127	-0.0837488	0.997	0.998	1
Actg1	0.00127396	-0.054015	0.787	0.821	1
Actl6a	0.9122	0.00458563	0.156	0.152	1
Actl6b	0.433827	0.00204687	0.004	0.004	1
Actn1	0.854866	0.0011455	0.084	0.081	1
Actn2	0.785555	0.00625019	0.007	0.007	1
Actn3	0.0802733	-0.00420456	0.001	0.003	1
Actn4	0.168522	0.0311897	0.212	0.195	1
Actr10	0.0228967	0.0421069	0.24	0.212	1
Actr1a	0.0196058	-0.00112277	0.219	0.206	1
Actr1b	0.479514	-0.0135809	0.115	0.121	1
Actr2	0.15461	-0.00993718	0.818	0.833	1
Actr3	0.034349	0.00767004	0.649	0.665	1
Actr3b	0.0650468	0.018344	0.031	0.022	1
Actr5	0.235948	0.0133652	0.061	0.052	1
Actr6	0.0553676	0.0247386	0.093	0.077	1
Actr8	0.261512	0.0202957	0.124	0.111	1
Actrt3	0.798139	0.000342544	0.001	0.001	1
Acvr1	9.4154e-05	0.0857573	0.375	0.329	1
Acvr1b	0.699567	-0.00103438	0.086	0.085	1
Acvr1c	0.127951	-0.00635255	0.003	0.006	1
Acvr2a	0.176624	0.0206429	0.268	0.251	1
Acvr2b	0.00836125	0.0132813	0.186	0.166	1
Acvrl1	0.222073	0.0177415	0.09	0.081	1
Acy1	0.127572	0.0101631	0.034	0.027	1
Acy3	0.6734	-0.00084072	0	0.001	1
Acyp1	0.240697	0.0057366	0.079	0.073	1
Acyp2	0.13607	0.0302805	0.054	0.045	1
Ada	0.945433	-0.000252761	0.013	0.013	1
Adal	0.0953149	0.00980837	0.067	0.066	1
Adam10	0.677284	0.00688812	0.842	0.835	1
Adam11	0.729353	-0.000993926	0.002	0.003	1
Adam12	0.834911	0.00254271	0.001	0.001	1
Adam15	0.380389	0.0229714	0.34	0.328	1
Adam17	0.188149	0.0289623	0.547	0.54	1
Adam18	0.328005	0.00774787	0.014	0.01	1
Adam19	0.0367055	0.00203197	0.001	0	1
Adam1a	0.814985	0.00136681	0.003	0.002	1
Adam2	0.457136	0.0023771	0.003	0.002	1
Adam21	0.00676463	0.00270865	0.002	0	1
Adam22	0.779934	0.00270618	0.04	0.041	1
Adam23	0.129538	-0.00113231	0.006	0.008	1
Adam3	0.133799	-0.0181045	0.163	0.167	1
Adam32	0.944522	2.34539e-05	0.003	0.004	1
Adam33	0.811793	-0.00133191	0.002	0.003	1
Adam4	0.697205	-0.00162952	0.007	0.008	1
Adam8	0.219534	0.00204687	0.005	0.004	1
Adam9	0.211138	0.023932	0.145	0.131	1
Adamts1	0.0038756	0.115083	0.082	0.061	1
Adamts10	0.027748	0.0185288	0.042	0.034	1
Adamts16	0.558538	-0.0141284	0.143	0.152	1
Adamts17	0.522026	0.000715277	0.008	0.006	1
Adamts2	0.635309	-0.000669164	0.001	0.001	1
Adamts20	0.98909	-0.000163399	0.001	0.001	1
Adamts3	0.642245	-0.00116055	0.003	0.004	1
Adamts4	0.947878	1.17516e-05	0.002	0.002	1
Adamts6	0.190951	0.00301776	0.124	0.117	1
Adamts7	0.887896	-0.00050202	0.001	0.001	1
Adamts9	0.664193	0.000687962	0.002	0.001	1
Adamtsl1	0.620175	-0.000497748	0.001	0.001	1
Adamtsl2	0.947212	-0.00111362	0.009	0.01	1
Adamtsl4	0.970739	0.000531342	0.004	0.004	1
Adamtsl5	0.818166	0.000513605	0.001	0.001	1
Adap1	0.641159	-0.00648	0.068	0.069	1
Adap2	0.000216181	-0.0755678	0.934	0.952	1
Adap2os	0.32965	-0.0369015	0.699	0.715	1
Adar	0.617233	0.00909124	0.133	0.13	1
Adarb1	0.0406354	0.0415814	0.216	0.192	1
Adarb2	0.337196	0.00927036	0.005	0.005	1
Adat1	0.520976	0.00699799	0.063	0.061	1
Adat2	0.528673	0.00574622	0.024	0.02	1
Adck1	0.0101604	-0.00963756	0.15	0.143	1
Adck2	0.0719912	0.01627	0.073	0.06	1
Adck5	0.168561	0.00856879	0.07	0.061	1
Adcy1	0.919094	-0.000782578	0.008	0.008	1
Adcy10	0.659092	0.000349896	0.002	0.001	1
Adcy2	0.278484	-0.00514537	0.006	0.009	1
Adcy3	0.183151	0.0110647	0.043	0.039	1
Adcy4	0.968384	0.000346223	0.002	0.001	1
Adcy5	0.178516	-0.00501038	0.004	0.005	1
Adcy6	0.447319	0.00558103	0.016	0.012	1
Adcy7	0.0977376	0.0226331	0.289	0.268	1
Adcy9	0.0310187	0.0453987	0.323	0.293	1
Adcyap1	0.247546	-0.0021854	0.001	0.002	1
Adcyap1r1	0.179715	0.00541282	0.006	0.003	1
Add1	0.00801063	0.0517094	0.329	0.294	1
Add2	0.325582	-0.00400502	0.004	0.006	1
Add3	0.00141069	0.0562466	0.253	0.216	1
Adgb	0.319106	-0.00948944	0.014	0.018	1
Adgra1	0.118531	-0.0041977	0.002	0.004	1
Adgra2	0.710936	0.000524262	0.002	0.002	1
Adgra3	0.291071	0.0163764	0.098	0.087	1
Adgrb1	0.432871	-0.00495879	0.008	0.011	1
Adgrb2	0.0212499	-0.0111558	0.006	0.012	1
Adgrb3	0.743382	-0.0051749	0.016	0.018	1
Adgre1	0.000480101	-0.0505531	0.653	0.697	1
Adgre4	0.052748	0.0197852	0.032	0.022	1
Adgre5	0.190052	0.00558103	0.007	0.004	1
Adgrf2	0.399182	-0.000322329	0.002	0.002	1
Adgrf5	0.0425902	0.00859817	0.009	0.006	1
Adgrg1	0.581196	0.00106712	0.564	0.57	1
Adgrg3	0.649235	-0.000831706	0.002	0.002	1
Adgrg5	0.426791	-0.00134649	0	0.001	1
Adgrg6	0.916594	0.000513605	0.001	0.001	1
Adgrl1	0.823068	0.000968621	0.023	0.022	1
Adgrl3	0.240354	-0.00604162	0.012	0.016	1
Adgrl4	0.0228124	0.011444	0.011	0.005	1
Adgrv1	0.404174	0.00254484	0.003	0.002	1
Adh5	0.05684	-0.0144861	0.229	0.227	1
Adhfe1	0.162011	-0.013906	0.082	0.082	1
Adi1	0.0173161	0.0209913	0.095	0.077	1
Adipor1	0.454565	0.00301901	0.355	0.345	1
Adipor2	0.040295	0.0317372	0.256	0.231	1
Adk	0.734135	0.00256419	0.12	0.116	1
Adm	0.981785	-0.000493482	0.002	0.002	1
Adnp	0.204301	-0.0243253	0.385	0.385	1
Adnp2	0.508679	-0.0072074	0.08	0.086	1
Ado	0.577458	-0.0107736	0.072	0.079	1
Adora1	0.573024	-0.00359061	0.011	0.012	1
Adora2a	0.0794232	-0.0032015	0	0.002	1
Adora2b	0.80335	0.000851988	0.002	0.001	1
Adora3	0.00865724	0.0264164	0.255	0.228	1
Adpgk	0.428372	-0.00195756	0.068	0.067	1
Adprh	0.169646	0.00456505	0.268	0.256	1
Adprhl2	0.937297	-0.00148402	0.107	0.107	1
Adprm	0.833889	0.00636277	0.072	0.069	1
Adra1a	0.333742	-0.00317689	0.002	0.002	1
Adra1b	0.784542	0.000851988	0.001	0.001	1
Adra2a	0.378806	0.00170168	0.002	0.002	1
Adra2c	0.75088	7.83992e-06	0.001	0.001	1
Adrb1	0.912721	0.00439261	0.321	0.32	1
Adrb2	0.66286	0.00614802	0.396	0.388	1
Adrm1	0.507517	0.0139049	0.125	0.118	1
Adsl	0.0848574	-0.00489789	0.085	0.082	1
Adss	0.122653	0.00272623	0.188	0.177	1
Adssl1	0.543008	-0.00289712	0.066	0.07	1
Adtrp	0.0646311	-0.0148193	0.038	0.049	1
Aebp1	0.330201	-0.000314058	0.003	0.004	1
Aebp2	0.324625	-0.0121179	0.254	0.253	1
Aen	0.874717	0.00384046	0.063	0.06	1
Afap1	0.335327	-0.00189038	0.056	0.054	1
Afap1l1	0.0037212	0.0618849	0.267	0.233	1
Afap1l2	0.440471	0.00152567	0.001	0	1
Afdn	0.606492	0.00699799	0.064	0.059	1
Aff1	0.0142743	-0.0657254	0.436	0.449	1
Aff2	0.839281	0.00119645	0.003	0.002	1
Aff3	0.815693	-0.00165475	0.003	0.004	1
Aff4	0.603023	0.0160934	0.426	0.415	1
Afg1l	0.139522	0.0315712	0.145	0.129	1
Afg3l1	0.351724	0.0225951	0.171	0.16	1
Afg3l2	0.971965	0.00232405	0.12	0.119	1
Afm	0.106432	0.00440064	0.004	0.001	1
Afmid	0.445695	-0.0120683	0.052	0.059	1
Afp	0.246182	-0.00768597	0.038	0.04	1
Aftph	0.382051	-0.0355618	0.791	0.804	1
Aga	0.759955	0.0108002	0.213	0.207	1
Agap1	0.493057	-0.00479252	0.209	0.205	1
Agap2	0.553819	0.00880277	0.046	0.041	1
Agap3	0.157729	0.00123163	0.136	0.129	1
Agbl1	0.598676	-0.00134162	0.001	0.002	1
Agbl2	0.384918	0.00186405	0.001	0	1
Agbl3	0.256465	0.0155939	0.08	0.069	1
Agbl4	0.467121	-0.00315242	0.005	0.006	1
Agbl5	0.547486	-0.00264223	0.042	0.042	1
Ager	0.594811	0.00136681	0.003	0.003	1
Agfg1	0.667377	-0.0089198	0.243	0.244	1
Agfg2	0.266193	0.00419538	0.083	0.077	1
Aggf1	0.00615662	0.0406806	0.154	0.127	1
Agk	0.00442274	0.00262944	0.149	0.135	1
Agl	0.739479	0.00944597	0.145	0.141	1
Agmat	0.362738	-0.00185207	0	0.001	1
Agmo	0.651988	0.0141235	0.872	0.866	1
Ago1	0.0243831	0.0509596	0.276	0.249	1
Ago2	0.528636	0.00596683	0.24	0.231	1
Ago3	0.46566	0.0170017	0.425	0.411	1
Ago4	0.0163186	0.0371568	0.139	0.116	1
Agpat1	0.124766	0.0137769	0.089	0.078	1
Agpat2	0.00713049	0.0152744	0.096	0.08	1
Agpat3	0.022474	0.0198598	0.293	0.27	1
Agpat4	0.251631	0.0142749	0.046	0.038	1
Agpat5	0.104543	0.0178033	0.183	0.166	1
Agps	0.897402	-0.00711074	0.646	0.651	1
Agrn	0.193982	0.00525025	0.022	0.018	1
Agrp	0.553099	0.00458983	0.02	0.017	1
Agt	0.0974755	0.00440064	0.004	0.001	1
Agtpbp1	0.0981003	0.0102506	0.151	0.139	1
Agtrap	0.0826127	0.0200618	0.082	0.068	1
Ahctf1	0.139879	0.0254979	0.168	0.16	1
Ahcy	0.482864	0.00305751	0.006	0.004	1
Ahcyl1	0.0288739	0.0381559	0.245	0.218	1
Ahcyl2	0.0976598	0.0218475	0.311	0.29	1
Ahdc1	0.0528434	0.0152195	0.138	0.123	1
Ahi1	0.800482	-0.0043572	0.055	0.058	1
Ahnak	0.825552	0.000722058	0.008	0.007	1
Ahnak2	0.764459	0.00119337	0.003	0.002	1
Ahr	0.610102	0.00220946	0.003	0.002	1
Ahrr	0.466824	0.00356328	0.006	0.004	1
Ahsa1	0.00636733	0.019997	0.195	0.172	1
Ahsa2	0.00415709	0.0393693	0.121	0.097	1
AI182371	0.349863	-0.000980125	0.004	0.005	1
AI413582	0.544845	0.0122141	0.19	0.18	1
AI427809	0.906688	-0.000664776	0.002	0.002	1
AI429214	0.119398	0.00657978	0.017	0.014	1
AI463229	0.522457	0.00558103	0.021	0.017	1
AI467606	0.288428	0.0174121	0.092	0.084	1
AI480526	0.374227	0.0115376	0.047	0.041	1
AI504432	0.0880018	0.0155958	0.027	0.021	1
AI506816	0.038434	0.00815687	0.107	0.096	1
AI593442	0.423595	-0.0068797	0.012	0.015	1
AI597479	0.477462	0.0100269	0.061	0.054	1
AI661453	0.703855	0.00475366	0.021	0.018	1
AI662270	0.000717838	0.0297312	0.05	0.032	1
AI837181	0.343536	0.016359	0.132	0.124	1
AI839979	0.818834	0.000681085	0.001	0.001	1
AI854703	0.19621	-0.00168527	0	0.001	1
AI987944	0.0522573	0.0194301	0.137	0.119	1
Aida	0.882498	0.0063255	0.113	0.11	1
Aif1	0.36473	-0.0158629	0.946	0.946	1
Aif1l	0.162147	-0.00252402	0.001	0.002	1
Aifm1	0.146393	0.00659492	0.135	0.125	1
Aifm2	0.445666	-0.00184685	0.001	0.002	1
Aifm3	0.43085	1.17516e-05	0.002	0.002	1
Aig1	0.304446	-0.0300266	0.303	0.306	1
Aim2	0.710316	-0.00584677	0.622	0.631	1
Aimp1	0.221472	0.0228414	0.282	0.264	1
Aimp2	0.858316	0.00157732	0.052	0.05	1
Aip	0.00319464	0.0314971	0.15	0.124	1
Airn	0.947835	0.00120259	0.003	0.003	1
Ajap1	0.0639203	-0.00301098	0.002	0.004	1
Ajm1	0.444945	0.00691162	0.016	0.013	1
Ajuba	0.044063	0.00524819	0.017	0.012	1
Ak1	0.434419	0.0126134	0.098	0.089	1
AK157302	0.783455	-0.00133191	0.003	0.004	1
Ak2	0.267037	0.0230817	0.201	0.186	1
Ak3	0.0707793	0.0136356	0.084	0.072	1
Ak4	0.972081	0.000531342	0.004	0.004	1
Ak5	0.49699	0.00124811	0.013	0.013	1
Ak6	0.626211	0.010373	0.111	0.104	1
Ak7	0.414958	-0.00201345	0.001	0.002	1
Ak9	0.661549	0.000513605	0.001	0.001	1
Akain1	0.362738	-0.00185207	0	0.001	1
Akap1	0.298758	0.013255	0.056	0.048	1
Akap10	0.681264	-0.0254214	0.419	0.429	1
Akap11	0.0107878	-0.00486104	0.191	0.18	1
Akap12	0.0952361	0.00724639	0.014	0.009	1
Akap13	0.00042142	0.069295	0.903	0.878	1
Akap14	0.546928	0.00152852	0.002	0.001	1
Akap17b	0.0761365	-0.0163553	0.022	0.029	1
Akap3	0.333447	-0.00230761	0.006	0.006	1
Akap5	0.761949	0.00444063	0.033	0.032	1
Akap6	0.531586	-0.00631755	0.016	0.02	1
Akap7	0.849853	0.0109032	0.219	0.217	1
Akap8	0.0596135	0.0403702	0.28	0.255	1
Akap8l	0.0843628	-0.0046181	0.44	0.426	1
Akap9	0.01677	0.0234908	0.429	0.399	1
Akip1	0.463656	0.0109601	0.068	0.061	1
Akirin1	0.844439	-0.000368234	0.362	0.359	1
Akirin2	0.0158875	0.0562645	0.517	0.492	1
Akna	0.363747	0.0096186	0.288	0.275	1
Aknaos	0.159316	-0.000208613	0.016	0.019	1
Akr1a1	0.0288938	-0.0137914	0.517	0.542	1
Akr1b10	0.072	0.0358132	0.275	0.251	1
Akr1b3	0.00293406	0.0577995	0.268	0.233	1
Akr1b7	0.469578	0.00118721	0.001	0	1
Akr1c13	0.853535	0.000868538	0.005	0.004	1
Akr1e1	0.260145	0.0122042	0.09	0.08	1
Akr7a5	0.0767717	0.021335	0.104	0.088	1
Akt1	0.0371502	0.0337581	0.271	0.244	1
Akt1s1	0.0225206	0.0293452	0.115	0.094	1
Akt2	0.001684	0.0333189	0.131	0.105	1
Aktip	0.0155434	0.0347521	0.099	0.081	1
Alad	0.205454	0.00720587	0.041	0.035	1
Alas1	0.615629	0.0101883	0.177	0.168	1
Alas2	0.826725	0.00154834	0.006	0.005	1
Alb	0.446387	0.00203695	0.003	0.001	1
Albfm1	0.095013	-0.00235191	0.001	0.003	1
Alcam	0.212544	-0.0126318	0.022	0.028	1
Aldh16a1	0.444782	0.0135382	0.096	0.087	1
Aldh18a1	0.800076	0.00444524	0.04	0.037	1
Aldh1a1	0.19104	0.00254484	0.003	0.001	1
Aldh1a2	0.48042	-0.00185207	0	0.001	1
Aldh1b1	0.102191	0.00490829	0.007	0.004	1
Aldh1l1	0.855	0.00172064	0.007	0.006	1
Aldh1l2	0.434252	0.00125411	0.014	0.014	1
Aldh2	0.0284415	0.0391614	0.178	0.159	1
Aldh3a2	0.0451332	0.00906709	0.106	0.095	1
Aldh3b1	0.175751	0.0100804	0.052	0.044	1
Aldh4a1	0.011583	0.00301053	0.05	0.043	1
Aldh5a1	0.276383	0.00424644	0.014	0.011	1
Aldh6a1	0.140108	0.0192119	0.086	0.073	1
Aldh7a1	0.0706809	0.0117649	0.087	0.074	1
Aldh9a1	0.335308	0.0122649	0.141	0.13	1
Aldoa	0.00197778	-0.060246	0.507	0.549	1
Aldoa.1	0.6734	-0.00084072	0	0.001	1
Aldoc	0.000227323	0.0454511	0.085	0.06	1
Alg1	0.612479	-0.00400303	0.112	0.112	1
Alg10b	0.417275	0.00828286	0.06	0.053	1
Alg11	0.0327501	0.0303862	0.104	0.087	1
Alg12	0.725439	0.00269852	0.051	0.049	1
Alg13	0.125683	0.0272693	0.095	0.082	1
Alg14	0.753181	0.00908272	0.13	0.124	1
Alg2	0.818233	0.00707838	0.109	0.106	1
Alg3	0.444607	0.00301738	0.053	0.049	1
Alg5	0.045323	-0.0152295	0.274	0.271	1
Alg6	0.615798	-0.00524743	0.086	0.086	1
Alg8	0.721182	0.00631684	0.122	0.117	1
Alg9	0.450412	0.00149242	0.129	0.124	1
Alk	0.818166	0.000513605	0.001	0.001	1
Alkal2	0.269783	-0.000301696	0.006	0.005	1
Alkbh1	0.733683	-0.00632871	0.181	0.18	1
Alkbh2	0.13443	0.0161362	0.058	0.047	1
Alkbh3	0.152063	0.0182138	0.175	0.171	1
Alkbh3os1	0.334029	0.00152567	0.001	0	1
Alkbh4	0.137739	0.00854446	0.029	0.022	1
Alkbh5	0.0580695	-0.032487	0.255	0.247	1
Alkbh6	0.329578	0.0115702	0.095	0.09	1
Alkbh7	0.77332	5.37608e-05	0.063	0.065	1
Alkbh8	0.32841	0.0238288	0.143	0.131	1
Alms1	0.910598	-0.00281366	0.047	0.048	1
Alox12	0.137661	0.00440146	0.004	0.002	1
Alox5	0.219316	-0.0154149	0.097	0.101	1
Alox5ap	0.00336357	0.025475	0.712	0.728	1
Aloxe3	0.274667	0.00373347	0.005	0.005	1
Alpk1	0.369612	0.0208383	0.097	0.088	1
Alpk2	0.217493	1.56579e-05	0.003	0.002	1
Alpl	0.45152	0.00271469	0.003	0.002	1
Als2	0.0676733	0.0179216	0.091	0.078	1
Als2cl	0.292915	0.0054134	0.01	0.007	1
Alyref	0.193026	0.0227787	0.151	0.136	1
Alyref2	0.16362	0.0155185	0.055	0.046	1
Amacr	0.0419245	0.00996243	0.043	0.034	1
Ambn	0.585775	-0.00200812	0.002	0.003	1
Ambra1	0.000303309	-0.0641791	0.57	0.617	1
Amd1	0.0034398	0.0478593	0.165	0.142	1
Amd2	0.0278763	0.00558103	0.004	0.001	1
Amdhd2	0.195025	0.0217887	0.108	0.096	1
Amer1	0.223206	0.00574234	0.044	0.039	1
Amer2	0.879723	0.00174474	0.012	0.011	1
Amer3	0.721157	0.00101955	0.001	0.001	1
Amfr	0.76969	-0.0130254	0.296	0.3	1
Amhr2	0.976655	0.000349896	0.002	0.002	1
Amigo1	0.932326	-0.000442755	0.01	0.01	1
Amigo2	0.0964138	0.00321679	0.002	0	1
Amigo3	0.454581	0.00221654	0.005	0.004	1
Ammecr1	0.217376	0.0141159	0.084	0.074	1
Ammecr1l	0.120593	0.00828577	0.151	0.139	1
Amn	0.0794232	-0.0032015	0	0.002	1
Amn1	0.463505	0.0083751	0.113	0.106	1
Amot	0.0511671	0.0033881	0.004	0.001	1
Amotl1	0.123319	0.0234646	0.083	0.07	1
Amotl2	0.412261	0.00238607	0.006	0.004	1
Ampd2	0.235063	0.011775	0.038	0.031	1
Ampd3	0.577446	0.0104736	0.089	0.085	1
Amph	0.589312	-0.00459469	0.01	0.013	1
Amt	0.509126	0.00273861	0.011	0.008	1
Amy1	0.943007	-0.00361723	0.045	0.047	1
Amz1	0.0211411	0.00104514	0.163	0.154	1
Amz2	0.64638	0.00602914	0.115	0.109	1
Anapc1	0.510489	0.00759851	0.198	0.19	1
Anapc10	0.0781243	0.0359006	0.235	0.212	1
Anapc11	0.105022	-0.00129978	0.241	0.231	1
Anapc13	0.972024	0.00217138	0.305	0.303	1
Anapc15	0.718367	0.0125041	0.216	0.213	1
Anapc16	0.313049	0.0234226	0.356	0.338	1
Anapc2	0.00918412	0.0347332	0.165	0.139	1
Anapc4	0.122687	0.0183975	0.159	0.143	1
Anapc5	0.0295667	0.0182761	0.242	0.22	1
Anapc7	0.0559707	0.0277427	0.132	0.113	1
Ancv1r	0.276316	-0.00201878	0.001	0.002	1
Ang	0.019234	0.0455348	0.408	0.375	1
Angel1	0.988634	0.00016384	0.028	0.028	1
Angel2	0.000284143	0.0522132	0.245	0.205	1
Angpt2	0.0346558	0.0201003	0.031	0.021	1
Angpt4	0.363329	-0.00150839	0.001	0.002	1
Angptl1	0.0214568	0.0157282	0.027	0.018	1
Angptl2	0.242256	0.0170311	0.051	0.043	1
Angptl3	0.0102026	0.0175779	0.042	0.029	1
Angptl4	0.352978	0.00237485	0.003	0.001	1
Angptl6	0.538112	0.00524842	0.017	0.014	1
Angptl7	0.32113	0.00943593	0.049	0.045	1
Ank	0.0164369	0.0361385	0.227	0.198	1
Ank1	0.714135	0.00374118	0.01	0.008	1
Ank2	0.000695646	-0.0917743	0.818	0.847	1
Ank3	0.112069	-0.0153802	0.022	0.026	1
Ankar	0.316102	0.00304865	0.002	0.001	1
Ankdd1b	0.916594	0.000513605	0.001	0.001	1
Ankfn1	0.00130202	0.00406107	0.003	0	1
Ankfy1	0.573311	-0.0278932	0.361	0.369	1
Ankhd1	0.365673	-0.0189599	0.499	0.514	1
Ankib1	0.527903	-0.010531	0.298	0.309	1
Ankle1	0.334029	0.00152567	0.001	0	1
Ankle2	0.0129627	0.0374509	0.293	0.262	1
Ankmy2	0.958561	0.00229777	0.109	0.108	1
Ankra2	0.536986	0.00801572	0.149	0.147	1
Ankrd10	0.0791588	0.0346026	0.28	0.256	1
Ankrd11	0.981721	-0.0069939	0.803	0.804	1
Ankrd12	0.265325	0.0214861	0.382	0.364	1
Ankrd13a	0.227877	0.0277055	0.282	0.264	1
Ankrd13b	0.183215	-0.0075837	0.012	0.015	1
Ankrd13c	0.163124	2.61604e-05	0.272	0.264	1
Ankrd13d	0.0192147	0.017727	0.046	0.033	1
Ankrd16	0.077566	0.0127499	0.098	0.086	1
Ankrd17	0.0348735	0.0427542	0.624	0.62	1
Ankrd2	0.474982	7.83992e-06	0.001	0.001	1
Ankrd23	0.520506	0.00122091	0.009	0.008	1
Ankrd24	0.868479	0.0011125	0.052	0.051	1
Ankrd26	0.00421918	0.0430675	0.108	0.086	1
Ankrd27	0.0851836	0.0183208	0.125	0.11	1
Ankrd28	0.105757	0.020286	0.078	0.065	1
Ankrd29	0.915287	0.000861932	0.004	0.003	1
Ankrd31	0.00413538	-0.016652	0.004	0.011	1
Ankrd33b	0.106129	-0.00318918	0.032	0.029	1
Ankrd34a	0.72774	-0.000484968	0.003	0.002	1
Ankrd34b	0.414958	-0.000326473	0.001	0.002	1
Ankrd34c	0.704078	0.00119029	0.002	0.001	1
Ankrd35	0.629359	-0.000314058	0.004	0.004	1
Ankrd37	0.201292	0.00145362	0.023	0.024	1
Ankrd39	0.797496	0.00525933	0.048	0.045	1
Ankrd40	0.0122753	0.0412931	0.204	0.176	1
Ankrd42	0.311976	0.00145645	0.022	0.02	1
Ankrd44	0.184003	0.0412799	0.938	0.94	1
Ankrd45	0.670461	-0.00216364	0.003	0.004	1
Ankrd46	0.314161	0.0119376	0.085	0.075	1
Ankrd49	0.893767	-0.00603055	0.118	0.121	1
Ankrd50	0.377298	-0.0118564	0.054	0.059	1
Ankrd52	0.0604504	0.0257966	0.116	0.105	1
Ankrd54	0.0314645	0.0201676	0.057	0.043	1
Ankrd55	0.944604	-0.00113231	0.007	0.007	1
Ankrd6	0.847367	-0.00164969	0.004	0.005	1
Ankrd61	0.839413	0.000145285	0.021	0.022	1
Ankrd63	0.485147	-0.00184685	0.001	0.002	1
Ankrd9	0.512487	0.00104504	0.006	0.005	1
Anks1	0.00819083	-0.00411467	0.387	0.368	1
Anks1b	0.122296	-0.0122442	0.03	0.039	1
Anks3	0.716932	0.0123268	0.183	0.176	1
Anks6	0.441435	0.0126243	0.073	0.066	1
Ankub1	0.691859	0.000684526	0.001	0.001	1
Ankzf1	0.034285	0.0226209	0.072	0.057	1
Anln	0.289717	0.00541445	0.012	0.011	1
Ano10	0.0480599	0.0268236	0.126	0.107	1
Ano3	0.161125	-0.00862789	0.007	0.011	1
Ano4	0.195524	0.00238383	0.005	0.004	1
Ano6	0.588905	0.0178002	0.362	0.35	1
Ano7	0.158571	-0.00497612	0.022	0.023	1
Ano8	0.250431	0.0106653	0.032	0.026	1
Anp32a	0.0595235	0.0292161	0.411	0.384	1
Anp32b	0.306442	0.0205702	0.268	0.252	1
Anp32e	0.205929	0.015515	0.213	0.198	1
Anpep	0.20959	-0.00100778	0	0.001	1
Antxr1	0.327632	0.000527805	0.004	0.003	1
Antxr2	0.259432	0.0121537	0.024	0.02	1
Anxa1	0.020741	0.00270865	0.001	0	1
Anxa10	0.199164	-0.00318918	0.002	0.004	1
Anxa11	0.459257	0.00510778	0.064	0.059	1
Anxa11os	0.231833	0.00186405	0.002	0	1
Anxa13	0.495681	0.00203695	0.003	0.001	1
Anxa2	0.0189921	0.00292719	0.018	0.013	1
Anxa4	0.121413	0.0212156	0.103	0.094	1
Anxa5	0.00659931	0.0355558	0.157	0.131	1
Anxa6	0.407258	-0.0152819	0.099	0.107	1
Anxa7	0.662077	0.0130383	0.17	0.162	1
Anxa9	0.198527	0.00474035	0.007	0.004	1
Aoah	0.985039	0.000404391	0.008	0.007	1
Aoc2	0.6186	-0.000330622	0.001	0.001	1
Aopep	0.0541786	0.0370997	0.37	0.342	1
Aox1	0.0367055	0.0016935	0.001	0	1
Ap1ar	0.0189068	0.0169347	0.151	0.133	1
Ap1b1	0.887991	0.0109071	0.344	0.341	1
Ap1g1	0.1517	0.0207776	0.377	0.356	1
Ap1g2	0.0697448	0.0107952	0.038	0.029	1
Ap1m1	0.00280965	0.024996	0.098	0.077	1
Ap1s1	0.0076619	0.0335616	0.151	0.126	1
Ap1s2	0.0251335	0.0425298	0.254	0.226	1
Ap1s3	0.428512	0.00507809	0.008	0.006	1
Ap2a1	0.413776	0.0171157	0.146	0.137	1
Ap2a2	0.00572361	0.0520653	0.271	0.237	1
Ap2b1	0.236307	0.0315449	0.366	0.349	1
Ap2m1	0.261544	0.00467461	0.249	0.239	1
Ap2s1	0.00060017	0.0270959	0.264	0.232	1
Ap3b1	0.0136327	0.0345561	0.629	0.633	1
Ap3b2	0.36828	-0.00513044	0.007	0.009	1
Ap3d1	0.14256	0.021175	0.211	0.193	1
Ap3m1	0.0937345	0.00134404	0.158	0.15	1
Ap3m2	0.408437	0.0156431	0.109	0.1	1
Ap3s1	0.202358	-0.0044412	0.253	0.245	1
Ap3s2	0.0124754	0.0381882	0.143	0.119	1
Ap4b1	0.553361	0.00192481	0.056	0.053	1
Ap4e1	0.109509	0.0169997	0.129	0.114	1
Ap4m1	0.223856	0.0188064	0.098	0.086	1
Ap4s1	0.721593	0.00164998	0.165	0.161	1
Ap5b1	0.819601	0.002918	0.016	0.014	1
Ap5m1	0.66449	-0.00597837	0.112	0.113	1
Ap5s1	0.20197	0.0142575	0.053	0.044	1
Ap5z1	0.115777	0.0202615	0.068	0.057	1
Apaf1	0.849305	0.0089033	0.165	0.16	1
Apba1	0.0556235	0.0257532	0.6	0.609	1
Apba2	0.0997443	-0.00761113	0.01	0.012	1
Apba3	0.378691	0.00817639	0.042	0.036	1
Apbb1	0.745243	0.00134786	0.034	0.034	1
Apbb1ip	0.012793	0.0453711	0.963	0.951	1
Apbb2	0.000104715	0.035548	0.608	0.632	1
Apbb3	0.260046	0.00072837	0.041	0.038	1
Apc	0.00403033	-0.0219112	0.611	0.643	1
Apc2	0.798349	0.00137271	0.004	0.003	1
Apcdd1	0.285444	-0.000993926	0.003	0.003	1
Apeh	0.101354	0.019193	0.069	0.057	1
Apex2	0.00554186	0.0270903	0.092	0.072	1
Aph1a	0.102272	0.00652024	0.22	0.208	1
Aph1b	0.308603	0.00205919	0.008	0.008	1
Aph1c	0.22645	0.00508906	0.031	0.027	1
Api5	0.514046	-0.00383976	0.255	0.251	1
Apip	0.324418	0.0177672	0.113	0.102	1
Aplf	0.00769427	-0.0139547	0.031	0.033	1
Apln	0.327527	-0.00200812	0.002	0.003	1
Aplnr	0.943996	0.000342544	0.001	0.001	1
Aplp1	0.305709	-0.0145968	0.08	0.085	1
Aplp2	0.615658	-0.0117262	0.283	0.278	1
Apmap	0.491525	0.0156538	0.093	0.085	1
Apoa2	0.00389226	0.00338502	0.002	0	1
Apob	0.20595	0.00339577	0.006	0.005	1
Apobec1	0.0793411	0.0418528	0.37	0.344	1
Apobec2	0.607854	0.00852431	0.028	0.025	1
Apobec3	0.0688308	-0.0263358	0.377	0.376	1
Apobec4	0.20959	-0.00100778	0	0.001	1
Apobr	0.565027	0.00353588	0.069	0.065	1
Apoc1	0.276184	0.00591658	0.008	0.005	1
Apoc2	0.0662189	0.010444	0.008	0.004	1
Apoc4	0.486423	0.000861932	0.003	0.003	1
Apod	0.00240553	0.0482297	0.115	0.089	1
Apoh	0.458913	-0.0016649	0.003	0.004	1
Apol8	0.6734	-0.00084072	0	0.001	1
Apold1	0.147053	0.00709303	0.007	0.004	1
Apoo	0.754036	0.00653678	0.052	0.048	1
Apool	0.0138845	0.00644726	0.144	0.13	1
Apopt1	0.188036	0.026849	0.187	0.177	1
App	0.056795	-0.0506765	0.57	0.595	1
Appbp2	0.432852	0.00947758	0.276	0.264	1
Appbp2os	0.70836	-0.00308583	0.012	0.014	1
Appl1	0.963386	0.00263558	0.229	0.227	1
Appl2	0.90175	-0.00344688	0.221	0.22	1
Aprt	0.320309	0.0137089	0.205	0.191	1
Aptx	0.137366	0.0125429	0.063	0.059	1
Aqp1	0.0367055	0.0016935	0.001	0	1
Aqp11	0.246958	0.000871835	0.005	0.005	1
Aqp4	0.207221	0.00971649	0.02	0.016	1
Aqr	0.534031	-0.00288972	0.224	0.22	1
Ar	0.544431	-0.00333023	0.004	0.005	1
Araf	0.107109	0.0201403	0.17	0.152	1
Arap1	0.351632	-0.00520017	0.193	0.191	1
Arap2	0.376853	-0.0236971	0.147	0.155	1
Arap3	0.0247864	0.0476071	0.327	0.298	1
Arc	0.626761	-0.000489222	0.003	0.002	1
Arcn1	0.380775	0.00692268	0.282	0.272	1
Arel1	0.667853	0.00813825	0.152	0.145	1
Arf1	0.00723278	0.0180286	0.631	0.643	1
Arf2	0.153257	0.0065787	0.159	0.148	1
Arf3	0.611789	-0.0157907	0.219	0.229	1
Arf4	0.0178336	0.0118997	0.465	0.483	1
Arf4os	0.6933	-0.00328066	0.009	0.011	1
Arf5	0.896848	-0.0105133	0.386	0.391	1
Arf6	0.210381	-0.0069074	0.142	0.141	1
Arfgap1	0.269356	0.0222193	0.138	0.125	1
Arfgap2	0.0341693	0.0357469	0.179	0.158	1
Arfgap3	0.288302	0.0167144	0.086	0.076	1
Arfgef1	0.0203075	0.00446152	0.398	0.374	1
Arfgef2	0.549653	0.00736663	0.178	0.17	1
Arfgef3	0.734369	-0.00214201	0.005	0.006	1
Arfip1	0.618509	0.00310324	0.08	0.08	1
Arfip2	0.153141	0.0164404	0.058	0.048	1
Arfrp1	0.0348584	0.0325588	0.163	0.14	1
Arg1	0.97056	-0.000326473	0.002	0.002	1
Arg2	0.372771	0.00524934	0.016	0.015	1
Arglu1	0.250266	-0.0249312	0.692	0.71	1
Arhgap1	0.535711	-0.0142491	0.116	0.124	1
Arhgap10	0.247916	-0.00260426	0.009	0.009	1
Arhgap11a	0.0668527	0.0177027	0.094	0.08	1
Arhgap12	0.0040762	0.0143433	0.687	0.707	1
Arhgap15	0.870643	-0.0121794	0.061	0.062	1
Arhgap17	0.0123049	0.0275594	0.685	0.696	1
Arhgap18	0.253132	-0.0290227	0.179	0.186	1
Arhgap19	0.725302	-0.000720014	0.04	0.039	1
Arhgap20	0.844922	-0.00229661	0.006	0.007	1
Arhgap21	0.25491	0.0163209	0.157	0.144	1
Arhgap22	0.00012225	0.0918332	0.859	0.845	1
Arhgap23	0.537287	0.0027776	0.023	0.02	1
Arhgap24	0.748972	0.00299372	0.367	0.367	1
Arhgap25	0.0411222	0.0329758	0.572	0.569	1
Arhgap26	0.349974	-0.0216585	0.094	0.101	1
Arhgap27	0.00757436	0.0508321	0.22	0.191	1
Arhgap27os1	0.640848	0.00192317	0.017	0.015	1
Arhgap27os2	0.694101	-0.00196578	0.007	0.008	1
Arhgap27os3	0.922414	0.00163385	0.026	0.026	1
Arhgap28	0.537471	-0.00134649	0	0.001	1
Arhgap29	0.890562	-0.00494512	0.072	0.074	1
Arhgap30	0.000150852	0.0719988	0.409	0.384	1
Arhgap31	0.000419048	0.068672	0.497	0.491	1
Arhgap32	0.0429865	-0.0254862	0.175	0.176	1
Arhgap33	0.6969	-0.00182087	0.004	0.005	1
Arhgap35	0.0410852	0.000283742	0.182	0.171	1
Arhgap39	0.00586862	-0.057629	0.661	0.697	1
Arhgap4	0.022787	0.0475228	0.275	0.246	1
Arhgap42	0.257342	0.00220709	0.003	0.001	1
Arhgap44	0.0355731	-0.00669014	0.003	0.008	1
Arhgap5	0.982666	-0.000553026	0.966	0.965	1
Arhgap6	0.817062	0.00273465	0.007	0.006	1
Arhgap9	0.488972	0.0101596	0.102	0.094	1
Arhgdia	0.995695	-0.0028941	0.458	0.457	1
Arhgdig	0.325044	-0.00515286	0.005	0.008	1
Arhgef1	0.20682	0.0118214	0.37	0.353	1
Arhgef10	0.816238	0.00107026	0.011	0.009	1
Arhgef10l	0.103329	0.0225887	0.089	0.077	1
Arhgef11	0.771825	0.0169608	0.288	0.28	1
Arhgef12	0.0489661	0.0507473	0.375	0.348	1
Arhgef15	0.595489	0.00102595	0.002	0.002	1
Arhgef17	0.897884	0.000360887	0.004	0.004	1
Arhgef18	0.0438517	0.00989694	0.168	0.153	1
Arhgef19	0.131999	0.00338656	0.003	0.001	1
Arhgef2	0.0709757	0.0402259	0.311	0.286	1
Arhgef25	0.128699	-0.00278244	0.028	0.027	1
Arhgef26	0.528617	-0.00234635	0.002	0.003	1
Arhgef28	0.971195	0.000527805	0.004	0.004	1
Arhgef3	0.490029	0.00303266	0.055	0.051	1
Arhgef33	0.301296	-0.00133676	0.002	0.002	1
Arhgef37	0.214942	0.00355477	0.002	0	1
Arhgef39	0.181764	0.00304865	0.002	0.001	1
Arhgef4	0.778524	0.0042647	0.027	0.024	1
Arhgef5	0.51527	-0.000305811	0.005	0.006	1
Arhgef6	0.101321	0.0425932	0.407	0.382	1
Arhgef7	0.849027	-0.0100158	0.191	0.196	1
Arhgef9	0.766874	-0.00330706	0.036	0.038	1
Arid1a	0.0558141	0.007966	0.7	0.715	1
Arid1b	0.0603119	0.0286623	0.658	0.661	1
Arid2	0.62168	-0.0275283	0.389	0.398	1
Arid3a	0.633772	0.0130209	0.166	0.158	1
Arid3b	0.000529593	0.0722896	0.288	0.253	1
Arid4a	0.0564876	-0.0390961	0.598	0.627	1
Arid4b	0.0234515	-0.025098	0.441	0.43	1
Arid5a	0.758289	0.00366	0.051	0.05	1
Arid5b	0.00278967	-0.0694964	0.484	0.525	1
Arih1	0.132077	-0.00851126	0.692	0.709	1
Arih2	0.420601	0.0212881	0.289	0.275	1
Arl1	0.000349399	0.0673776	0.382	0.337	1
Arl10	0.307394	0.0191469	0.196	0.182	1
Arl11	0.0414986	0.0291256	0.194	0.171	1
Arl13a	0.221213	0.00321845	0.003	0.001	1
Arl13b	0.178691	0.011963	0.114	0.103	1
Arl14ep	0.0194011	0.0194597	0.12	0.102	1
Arl15	0.469446	0.0178796	0.742	0.741	1
Arl16	0.707106	0.00120407	0.038	0.038	1
Arl2	0.183968	0.0207721	0.123	0.109	1
Arl2bp	0.359784	0.00923765	0.059	0.052	1
Arl3	0.162772	0.00236432	0.195	0.185	1
Arl4a	0.533841	0.00752144	0.042	0.037	1
Arl4c	0.00236327	-0.0239371	0.587	0.625	1
Arl4d	0.184665	-0.0065965	0.011	0.014	1
Arl5a	0.467694	0.0133814	0.254	0.243	1
Arl5b	0.747423	0.00997013	0.215	0.207	1
Arl5c	0.408883	0.0180466	0.119	0.109	1
Arl6	0.534737	-0.00229181	0.026	0.029	1
Arl6ip1	0.426264	0.00237453	0.782	0.792	1
Arl6ip4	0.0347376	0.0326624	0.149	0.128	1
Arl6ip5	0.436724	-0.0244137	0.307	0.315	1
Arl6ip6	0.208632	0.0152312	0.134	0.121	1
Arl8a	0.104305	0.023378	0.251	0.23	1
Arl8b	0.0378612	0.00558103	0.435	0.413	1
Arl9	0.389337	0.0015427	0.006	0.004	1
Armc1	0.00372276	0.0327512	0.19	0.161	1
Armc10	0.722252	0.00776812	0.075	0.071	1
Armc2	0.202709	0.00237935	0.004	0.002	1
Armc3	0.904553	0.00199447	0.106	0.104	1
Armc4	0.486325	0.00152567	0.001	0	1
Armc5	0.23325	0.0180693	0.1	0.088	1
Armc6	0.609189	0.00163385	0.026	0.024	1
Armc7	0.101872	0.0128171	0.109	0.096	1
Armc8	0.390997	0.0153462	0.218	0.206	1
Armc9	0.814814	0.00324997	0.076	0.073	1
Armcx1	0.883282	0.000875126	0.005	0.005	1
Armcx2	0.963551	0.00234774	0.041	0.04	1
Armcx3	0.764037	0.00908698	0.136	0.13	1
Armcx4	0.677204	-0.00216907	0.002	0.003	1
Armcx5	0.575111	0.00829722	0.054	0.048	1
Armcx6	0.556999	0.000907791	0.013	0.012	1
Armh1	0.604	0.00135793	0.001	0.001	1
Armh3	0.163155	0.0412727	0.351	0.33	1
Armh4	0.595489	0.00102595	0.002	0.002	1
Armt1	0.368507	0.00307744	0.072	0.067	1
Arnt	0.423281	0.0206048	0.37	0.356	1
Arnt2	0.638555	-0.00366493	0.019	0.02	1
Arntl	0.00622585	0.0123508	0.119	0.103	1
Arntl2	0.784542	0.000851988	0.001	0.001	1
Arpc1a	0.167833	0.031228	0.287	0.268	1
Arpc1b	0.000898618	0.0571941	0.779	0.773	1
Arpc2	0.398837	-0.0319327	0.907	0.911	1
Arpc3	0.000475714	-0.0265381	0.683	0.722	1
Arpc4	0.000272204	0.0631128	0.64	0.625	1
Arpc5	0.753045	0.000382875	0.407	0.403	1
Arpc5l	0.0321649	-0.00304733	0.298	0.284	1
Arpin	0.546997	0.000684526	0.001	0.001	1
Arpp19	0.754385	-0.00622888	0.352	0.35	1
Arrb1	0.0378375	0.0263728	0.245	0.22	1
Arrb2	0.0145969	0.0527927	0.478	0.455	1
Arrdc1	0.265868	0.0227725	0.145	0.132	1
Arrdc2	0.924689	0.00113817	0.026	0.025	1
Arrdc3	0.174422	0.0126758	0.176	0.162	1
Arrdc4	0.533876	-0.00445951	0.069	0.073	1
Arsa	0.0377847	0.0260164	0.082	0.067	1
Arsb	0.108121	-0.0553841	0.985	0.986	1
Arsg	9.07165e-05	-0.0704098	0.177	0.203	1
Arsk	0.610727	0.000118341	0.186	0.181	1
Art3	0.742997	0.000301264	0.023	0.022	1
Arv1	0.504634	0.013408	0.087	0.081	1
Arvcf	0.173532	0.0162152	0.121	0.108	1
Arx	0.404064	0.00237485	0.003	0.001	1
Arxes1	0.40517	-0.00165982	0.004	0.004	1
Arxes2	0.766069	0.00154552	0.005	0.005	1
As3mt	0.0209574	0.0406483	0.187	0.164	1
Asah1	0.602047	-0.00173965	0.834	0.841	1
Asah2	0.514494	0.00181458	0.122	0.117	1
Asap1	0.164241	0.0119703	0.896	0.881	1
Asap2	0.708878	0.00508839	0.026	0.024	1
Asap3	0.00170985	0.0386356	0.149	0.12	1
Asb1	0.389347	1.26972e-06	0.027	0.025	1
Asb10	0.695941	0.00303097	0.057	0.054	1
Asb11	0.20959	-0.00100778	0	0.001	1
Asb13	0.389193	-0.00906574	0.114	0.123	1
Asb15	0.440471	0.00152567	0.001	0	1
Asb2	0.245707	0.0278536	0.236	0.22	1
Asb3	0.00529823	0.0530746	0.287	0.252	1
Asb4	0.789098	-0.00260426	0.01	0.011	1
Asb5	0.0517236	0.0146324	0.027	0.018	1
Asb6	0.636682	0.00734266	0.052	0.047	1
Asb7	0.117113	0.0177999	0.137	0.121	1
Asb8	0.258702	-0.009867	0.09	0.093	1
Ascc1	0.00312664	0.0341079	0.215	0.185	1
Ascc2	0.471348	-0.00331687	0.13	0.128	1
Ascc3	0.0904385	0.0509003	0.472	0.449	1
Ascl1	0.370324	0.00203446	0.002	0.001	1
Ascl2	0.0341742	0.00541293	0.008	0.004	1
Ascl4	0.34609	0.00985082	0.027	0.023	1
Asf1a	0.0237445	0.0315219	0.116	0.097	1
Asf1b	0.353385	0.00541399	0.011	0.009	1
Asgr2	0.0525323	-0.00733846	0.005	0.01	1
Ash1l	0.712062	-0.0239514	0.648	0.657	1
Ash2l	0.319001	0.0188175	0.142	0.129	1
Asic1	0.433284	-0.00184685	0.001	0.002	1
Asic2	0.0332031	-0.00282141	0.004	0.007	1
Asic4	0.467213	0.00152852	0.002	0.001	1
Asl	0.201349	0.0191247	0.095	0.082	1
Asmt	0.415934	-0.00216907	0.003	0.004	1
Asna1	0.695858	-0.00683388	0.104	0.107	1
Asns	0.0307068	-0.0125894	0.008	0.015	1
Asnsd1	0.0907026	0.0183579	0.153	0.137	1
Aspa	0.534345	0.00341094	0.012	0.009	1
Asph	0.757279	-0.0140413	0.719	0.727	1
Asphd1	0.260193	-0.003017	0.002	0.004	1
Asphd2	0.830135	0.00154552	0.005	0.005	1
Aspm	0.908072	0.00119337	0.001	0.001	1
Aspn	0.338795	0.00574899	0.006	0.004	1
Aspscr1	0.855853	-0.00617399	0.104	0.108	1
Asrgl1	0.734507	0.00348655	0.042	0.039	1
Ass1	0.694465	-0.000634232	0.005	0.006	1
Aste1	0.155959	-0.0181009	0.063	0.069	1
Astl	0.98909	-0.000163399	0.001	0.001	1
Astn1	0.712098	0.00157354	0.011	0.011	1
Astn2	0.814821	0.002918	0.015	0.013	1
Asxl1	0.0507433	0.0131083	0.481	0.494	1
Asxl2	0.947863	-0.00691799	0.446	0.449	1
Asxl3	0.052947	-0.00470891	0.001	0.003	1
Atad1	0.371407	0.0196008	0.252	0.238	1
Atad2	0.280177	0.0187644	0.12	0.108	1
Atad2b	0.00228037	0.0792612	0.42	0.384	1
Atad3a	0.414864	-0.0111929	0.089	0.094	1
Atad3aos	0.898622	0.00175271	0.015	0.014	1
Atad5	0.518359	0.00590396	0.037	0.033	1
Atat1	0.014279	0.0278715	0.135	0.113	1
Atcay	0.979785	-0.0001273	0.006	0.006	1
Ate1	0.031126	0.0391651	0.212	0.187	1
Atf1	0.18133	0.0283373	0.249	0.231	1
Atf2	0.410725	-0.0291188	0.304	0.317	1
Atf3	0.970014	-0.0104844	0.315	0.313	1
Atf4	0.992059	0.000120704	0.233	0.232	1
Atf5	0.903273	0.00163115	0.026	0.025	1
Atf6	0.368383	-0.0257705	0.409	0.418	1
Atf6b	0.645644	0.0114913	0.128	0.121	1
Atf7	0.766201	0.0123277	0.409	0.404	1
Atf7ip	0.117772	0.0263873	0.451	0.427	1
Atf7ip2	0.426791	-0.00134649	0	0.001	1
Atg10	0.517279	-0.0264408	0.583	0.597	1
Atg101	0.395103	0.015243	0.142	0.133	1
Atg12	0.723727	0.0106806	0.186	0.178	1
Atg13	0.0458213	0.0131801	0.111	0.098	1
[truncated: 15,679 more rows]

## Sheet: DEG_Oligodendrocytes
SYMBOL	p_val	avg_log2FC	pct.1	pct.2	p_val_adj
Apoe	1.10275e-55	0.393447	0.995	0.99	2.02884e-51
Ttr	1.42823e-73	0.944196	0.6	0.419	2.62766e-69
Slc38a2	1.14934e-20	0.247921	0.925	0.915	2.11455e-16
Scd2	5.17979e-29	-0.250983	0.993	0.997	9.52977e-25
Actb	6.32232e-35	-0.285876	0.996	0.997	1.16318e-30
Srebf1	1.51434e-30	-0.220274	0.259	0.375	2.78608e-26
Hsp90ab1	2.98041e-07	0.1064	0.996	0.996	0.00548336
Abca1	2.76142e-23	-0.239654	0.358	0.475	5.08045e-19
Actg1	1.2211e-21	-0.19235	0.85	0.909	2.24657e-17
C1qb	4.08927e-31	0.213278	0.239	0.122	7.52344e-27
Rbm3	2.39556e-30	-0.241416	0.348	0.475	4.40735e-26
AC149090.1	2.63158e-30	0.268796	0.463	0.318	4.84158e-26
Hbb-bs	4.38708e-32	-0.205006	0.121	0.233	8.07135e-28
Tpt1	3.44051e-06	0.116598	0.982	0.988	0.0632984
Hspa1b	1.30881e-19	0.141058	0.108	0.047	2.40794e-15
Sgk1	0.00429816	0.0861457	0.976	0.972	1
C1qa	4.82614e-24	0.190266	0.227	0.125	8.87913e-20
Apod	4.03765e-12	0.0860251	0.9	0.933	7.42847e-08
Hspa8	5.68044e-11	0.112415	0.986	0.99	1.04509e-06
Hspa1a	1.83832e-15	0.138953	0.109	0.057	3.38213e-11
Msmo1	4.17469e-14	0.188399	0.53	0.438	7.68059e-10
AA465934	1.81689e-17	-0.0713563	0.019	0.062	3.34271e-13
Gramd1b	7.22766e-12	-0.15421	0.352	0.422	1.32975e-07
Ndrg1	5.31893e-07	0.0701305	0.863	0.879	0.00978576
Creb5	6.48891e-20	-0.206901	0.859	0.886	1.19383e-15
Sytl2	2.39421e-20	-0.248244	0.629	0.689	4.40487e-16
Hsph1	3.62568e-15	0.169474	0.436	0.345	6.67052e-11
Car2	8.80007e-06	0.0653557	0.903	0.934	0.161904
Hmgcs1	6.15723e-11	0.2009	0.599	0.543	1.13281e-06
Pantr1	1.55397e-11	0.174691	0.646	0.573	2.85899e-07
Prkca	9.5895e-11	-0.161303	0.79	0.828	1.76428e-06
Cacybp	7.36622e-12	0.145047	0.594	0.507	1.35524e-07
Fcer1g	1.05303e-14	0.0769022	0.071	0.027	1.93736e-10
Zbtb16	3.1721e-12	0.126735	0.82	0.742	5.83603e-08
Dtna	1.76529e-14	-0.187561	0.774	0.828	3.24778e-10
Dbi	4.03902e-13	-0.125216	0.99	0.994	7.43099e-09
Dixdc1	0.000248029	0.100147	0.832	0.819	1
Hspa5	3.21218e-19	0.23913	0.739	0.673	5.90978e-15
Rpsa	2.56531e-05	0.104222	0.968	0.967	0.471965
Hsp90aa1	0.127429	0.0407107	0.987	0.991	1
Fnbp1	1.99225e-17	-0.192605	0.897	0.936	3.66535e-13
Atp1a1	2.77837e-18	-0.176879	0.695	0.743	5.11164e-14
Dnaja1	2.58752e-14	0.168101	0.851	0.797	4.76052e-10
Aspa	1.45544e-17	-0.210437	0.875	0.914	2.67771e-13
Idi1	2.89326e-09	0.146323	0.401	0.338	5.32302e-05
Ahsa2	9.08389e-12	0.123074	0.334	0.251	1.67125e-07
Hsp90b1	5.66812e-11	0.132356	0.936	0.905	1.04282e-06
C1qc	1.09569e-14	0.124729	0.145	0.08	2.01584e-10
Jph4	2.0695e-05	0.119405	0.584	0.53	0.380747
Kcna1	2.23354e-16	-0.214587	0.759	0.794	4.10926e-12
Tyrobp	5.5938e-15	0.111775	0.121	0.061	1.02915e-10
Trem2	8.24146e-12	0.074035	0.088	0.043	1.51626e-07
Cdh10	1.24527e-07	-0.17489	0.808	0.84	0.00229104
Rpl13	1.1509e-09	0.181529	0.994	0.99	2.11743e-05
Cryab	0.000217374	0.0541407	0.949	0.968	1
Cst3	1.99479e-16	0.204729	0.95	0.916	3.67001e-12
Slc24a2	1.38789e-13	-0.212243	0.898	0.933	2.55345e-09
Rps24	1.06828e-07	0.0846119	0.966	0.975	0.00196543
Acsl3	9.77597e-13	-0.165845	0.665	0.705	1.79858e-08
Dnajb1	8.49874e-11	0.112455	0.247	0.179	1.5636e-06
Tubb4a	8.43835e-06	0.0279231	0.923	0.951	0.155249
Qdpr	5.37756e-07	0.0476857	0.905	0.938	0.00989364
Cyp51	4.99331e-08	0.133537	0.432	0.369	0.000918669
Klf13	0.00608578	0.0592656	0.901	0.908	1
Tuba1b	8.15108e-07	0.0742375	0.504	0.437	0.0149963
Rnf144a	1.24162e-09	0.12337	0.611	0.529	2.28433e-05
Rps2	2.6847e-06	0.100514	0.946	0.941	0.0493932
Atxn1	0.040504	-0.0574625	0.237	0.266	1
Rps29	1.44698e-05	0.0860012	0.979	0.984	0.266216
Snap25	0.000615646	-0.0201151	0.257	0.293	1
Rps8	6.50648e-05	0.0675837	0.984	0.992	1
Bfsp2	2.00299e-05	0.108803	0.448	0.389	0.36851
Hcn2	1.5695e-11	-0.240313	0.295	0.354	2.88757e-07
Kctd3	4.99324e-13	-0.186852	0.501	0.564	9.18656e-09
mt-Co2	1.26467e-12	-0.102221	1	1	2.32674e-08
P2ry12	1.97737e-10	0.0830764	0.113	0.064	3.63796e-06
St6galnac3	1.85843e-14	-0.22239	0.928	0.953	3.41915e-10
P4ha1	1.70935e-09	0.146814	0.504	0.432	3.14487e-05
Crebrf	9.47199e-08	0.12591	0.688	0.626	0.00174266
Rps3	8.05538e-07	0.0773145	0.929	0.943	0.0148203
Eef1a1	0.0965741	0.0565694	0.989	0.991	1
Srsf7	1.47713e-11	0.137201	0.688	0.612	2.71763e-07
Manf	3.21006e-10	0.1325	0.514	0.431	5.90587e-06
Slc6a1	2.69582e-06	-0.0813485	0.695	0.699	0.0495977
Gjc2	0.000407775	0.0880873	0.613	0.588	1
Hexb	4.43009e-11	0.14499	0.41	0.33	8.15047e-07
Mobp	1.2142e-11	-0.172067	0.895	0.928	2.23388e-07
Hba-a2	1.33312e-14	-0.0712499	0.029	0.074	2.45267e-10
Nfic	2.12348e-10	-0.141966	0.433	0.485	3.90678e-06
Rps3a1	4.96328e-05	0.0768505	0.962	0.969	0.913144
Polr3e	8.21169e-05	0.124004	0.707	0.682	1
Cx3cr1	1.8493e-09	0.0867603	0.119	0.071	3.40234e-05
Ctss	1.27176e-11	0.105398	0.122	0.069	2.33978e-07
Arid5b	0.00098823	0.0892551	0.869	0.861	1
Fdft1	2.29649e-05	0.0837989	0.369	0.314	0.422508
Fcrls	1.73009e-09	0.0670381	0.065	0.03	3.18302e-05
Pacrg	2.36698e-10	-0.185602	0.66	0.706	4.35477e-06
Arsg	3.01186e-11	-0.156475	0.588	0.637	5.54122e-07
Csf1r	8.21923e-09	0.0726683	0.079	0.041	0.000151217
Arpc1b	1.87367e-05	0.102122	0.419	0.362	0.344719
Kif13b	3.79558e-12	-0.173648	0.854	0.873	6.98311e-08
Anks1b	0.725892	0.0550957	0.941	0.94	1
Ubc	0.00481714	0.067506	0.953	0.951	1
Penk	4.92699e-09	-0.0235352	0.004	0.021	9.06467e-05
Hspd1	2.17069e-05	0.0859639	0.683	0.63	0.399363
Ptges3	0.00180847	0.0766742	0.884	0.879	1
Ank	5.8562e-10	-0.143112	0.761	0.787	1.07742e-05
Hba-a1	1.96996e-12	-0.0902573	0.06	0.111	3.62434e-08
Edil3	1.37385e-11	-0.163081	0.989	0.994	2.52761e-07
Rpl6	0.0806711	0.0478606	0.972	0.972	1
Pvt1	1.33901e-09	-0.170487	0.403	0.463	2.4635e-05
Fkbp4	3.50018e-06	0.0868065	0.563	0.498	0.0643963
Gm50323	8.42789e-10	-0.117622	0.145	0.204	1.55056e-05
Rplp0	0.00330735	0.0709097	0.914	0.91	1
Dynll1	9.81803e-06	0.124375	0.827	0.787	0.180632
Pdia6	8.60355e-14	0.171933	0.536	0.459	1.58288e-09
Ttll5	1.66884e-10	-0.164312	0.625	0.669	3.07032e-06
Creld2	2.92619e-06	0.0622908	0.135	0.094	0.053836
mt-Co1	8.63348e-12	-0.109477	1	1	1.58839e-07
Fcgr1	9.52538e-05	0.0122787	0.012	0.004	1
Xkr4	0.00563606	-0.061997	0.637	0.675	1
Gpr34	3.06567e-08	0.0527262	0.07	0.036	0.000564023
Hpca	4.59909e-09	-0.0374354	0.013	0.038	8.46141e-05
Mat2a	0.000973107	0.0821876	0.918	0.895	1
Rpl23	0.00189651	0.0667049	0.97	0.975	1
Tuba1a	5.61211e-05	0.0911858	0.971	0.976	1
Rtn4	0.0878969	0.00882256	0.979	0.985	1
Rcan2	1.91766e-12	-0.176772	0.913	0.937	3.52812e-08
Selplg	9.33494e-08	0.0504497	0.059	0.029	0.00171744
Laptm5	8.07705e-09	0.0558775	0.063	0.03	0.000148602
Txnip	3.06053e-05	0.0807608	0.22	0.176	0.563077
Amer2	0.00226906	0.0677145	0.554	0.509	1
Hspe1	1.20357e-06	0.11838	0.716	0.672	0.0221432
mt-Nd5	3.53057e-07	-0.102929	0.968	0.974	0.00649554
Enpp6	5.44981e-09	-0.202878	0.183	0.238	0.000100266
Aif1l	0.000315271	0.0742339	0.323	0.277	1
Tmem50a	0.000958798	0.0398782	0.794	0.754	1
Aplp1	0.000895136	-0.00380775	0.937	0.959	1
Rpl23a	0.000666923	0.0724756	0.829	0.797	1
Rpl10	0.000822828	0.0762115	0.907	0.903	1
Tmem178b	9.31515e-09	-0.136605	0.953	0.966	0.00017138
Stmn1	0.00217591	0.0145499	0.916	0.94	1
Adamts13	6.27212e-07	0.0158191	0.012	0.001	0.0115395
App	2.94794e-14	-0.124365	0.996	0.996	5.42362e-10
Mxd4	9.26225e-05	0.0879145	0.504	0.453	1
Slc3a2	1.34858e-06	0.0887446	0.394	0.33	0.0248112
4933431E20Rik	0.000841158	0.0765842	0.425	0.382	1
Rps23	0.000397585	0.0673236	0.965	0.972	1
Ndrg2	2.66106e-05	0.0971051	0.602	0.545	0.489581
Ptms	1.42173e-05	0.108849	0.531	0.475	0.261569
Sox8	1.67132e-07	0.128924	0.562	0.502	0.00307489
Mettl26	2.23028e-05	0.0801761	0.306	0.253	0.410328
Rps21	0.00325576	0.0531942	0.977	0.985	1
Traf6	0.000154401	0.0714775	0.427	0.374	1
Rhob	4.23197e-11	-0.148264	0.89	0.913	7.78599e-07
Malat1	3.92863e-05	0.0796463	1	1	0.722789
Cab39l	0.000233177	0.115808	0.498	0.455	1
Glul	3.49925e-12	-0.214717	0.917	0.946	6.43791e-08
Ctnna3	2.08217e-08	-0.197323	0.848	0.882	0.000383077
Shisa7	0.000958037	0.0491618	0.074	0.053	1
Ugt8a	0.028207	0.0241984	0.951	0.963	1
Rdx	0.128052	0.046392	0.954	0.947	1
Aldoa	3.12373e-09	-0.1517	0.877	0.898	5.74704e-05
Pop5	1.12147e-05	0.0802113	0.441	0.38	0.206329
Cox7b	1.63513e-05	-0.0793873	0.727	0.73	0.30083
Rpl9	0.000134794	0.0562807	0.957	0.969	1
Rpl8	0.00711102	0.0624066	0.954	0.955	1
H2afj	7.3634e-12	-0.181566	0.819	0.864	1.35472e-07
Zbtb20	0.000484446	-0.0567541	0.996	0.998	1
Smarcc1	2.70339e-05	0.0860716	0.49	0.432	0.49737
Jade2	0.00114761	0.0605145	0.269	0.23	1
Ctnna2	0.0601599	-0.0143361	0.821	0.843	1
Nrgn	2.52131e-06	-0.0859998	0.12	0.164	0.0463871
Fdps	2.44134e-05	0.108606	0.485	0.437	0.449158
Rpl3	0.000520416	0.080481	0.929	0.929	1
Plekhf1	0.000347698	0.0720552	0.38	0.331	1
Ermn	3.20919e-06	0.00319815	0.889	0.925	0.0590427
Neat1	6.6781e-11	-0.178333	0.741	0.8	1.22864e-06
mt-Co3	1.60535e-08	-0.0769691	1	1	0.000295353
Ptov1	7.39485e-06	0.0892771	0.518	0.455	0.13605
A330049N07Rik	1.17521e-08	-0.184635	0.421	0.479	0.000216215
mt-Atp6	5.72526e-09	-0.0823757	1	1	0.000105333
Fscn1	0.0277028	0.0516099	0.619	0.586	1
Prdx6	2.54722e-05	0.0912378	0.541	0.484	0.468637
Eif3h	3.20401e-05	0.0820697	0.612	0.555	0.589473
Tmem119	8.08179e-07	0.0369651	0.047	0.022	0.0148689
S100a9	1.40584e-05	0.0286976	0.011	0.002	0.258646
Rpl14	0.000677844	0.0583796	0.932	0.943	1
Kcnma1	1.84753e-11	0.244655	0.273	0.198	3.39909e-07
Nacc2	1.70461e-05	0.0650764	0.434	0.375	0.313615
Rps6	0.0857011	0.0518584	0.924	0.922	1
Dennd5b	0.000820017	0.0860291	0.683	0.638	1
mt-Nd4	1.89409e-08	-0.0822764	1	1	0.000348475
Cdc42ep1	0.000704246	0.0560398	0.463	0.414	1
Fxr1	0.00232633	0.0539232	0.81	0.774	1
Hexa	1.5081e-06	0.0901955	0.273	0.22	0.0277461
Srebf2	1.81015e-06	0.0956648	0.509	0.445	0.0333031
Prpf31	7.20574e-06	0.077922	0.242	0.193	0.132571
Klf15	2.56722e-05	0.0693049	0.255	0.205	0.472317
Coq2	2.33842e-05	0.079848	0.342	0.287	0.430223
Lzts2	0.0300827	0.045813	0.639	0.606	1
Nmt1	8.744e-06	0.0882228	0.493	0.431	0.160872
Igkc	2.24767e-05	-0.0221952	0.001	0.008	0.413526
mt-Atp8	1.80955e-07	-0.0869891	0.767	0.76	0.00332921
Opalin	5.77374e-09	-0.172234	0.851	0.879	0.000106225
Plxdc2	1.74052e-10	-0.142148	0.935	0.954	3.20222e-06
Yy1	0.00013498	0.0850491	0.528	0.479	1
Zfp532	2.00136e-05	-0.0840914	0.594	0.606	0.368209
Chd4	8.44338e-05	0.0952824	0.705	0.665	1
Zfp536	3.99957e-11	-0.148792	0.956	0.974	7.35841e-07
Ndufb4	0.000423529	-0.0513675	0.776	0.77	1
Dusp10	0.0476833	0.0556369	0.419	0.388	1
Dync1h1	2.62483e-07	-0.0776191	0.75	0.747	0.00482915
Uqcr10	2.02511e-06	-0.104848	0.797	0.809	0.0372579
Lysmd2	4.97485e-05	0.0646542	0.232	0.185	0.915272
Mrpl18	0.000220242	0.0617114	0.454	0.401	1
Sqle	4.1375e-05	0.0768549	0.227	0.185	0.761218
Rplp1	0.000303469	0.0503828	0.976	0.986	1
Calr	2.37042e-08	0.142279	0.79	0.744	0.000436109
Zfp951	0.00200283	-0.0449214	0.075	0.101	1
Rack1	0.00254498	0.0655364	0.822	0.79	1
Hspa4l	0.00316832	0.0710979	0.439	0.397	1
Il33	0.00136737	0.0294596	0.859	0.885	1
Thsd4	5.31481e-06	-0.130704	0.176	0.216	0.0977819
Taldo1	0.000295994	0.0199454	0.92	0.944	1
Ank3	1.16178e-08	-0.113468	0.996	0.995	0.000213745
Gab1	4.596e-10	-0.141367	0.927	0.94	8.45572e-06
Nbas	3.242e-10	-0.15201	0.864	0.895	5.96464e-06
Ikzf2	5.37089e-05	0.0775135	0.621	0.565	0.988135
Bag3	0.00018576	0.0408959	0.076	0.052	1
Naaa	0.000179523	0.0342332	0.052	0.031	1
Foxj2	0.000356655	0.0568115	0.223	0.181	1
Tm2d3	1.28366e-05	0.0770789	0.35	0.292	0.236167
Mfsd14a	0.0058896	0.0466136	0.466	0.425	1
Cct6a	0.00105866	0.0804188	0.728	0.697	1
Pcnp	5.79169e-05	-0.0302763	0.688	0.665	1
Hnrnph3	3.0765e-05	0.0822047	0.614	0.557	0.566015
Bcar1	0.0140708	0.0520999	0.405	0.368	1
Dusp11	6.90055e-06	0.0785056	0.501	0.438	0.126956
Ano4	6.56298e-11	-0.142776	0.95	0.972	1.20746e-06
Chordc1	0.000515295	0.0734939	0.501	0.452	1
Xbp1	9.96367e-08	0.100317	0.283	0.226	0.00183312
Vegfa	0.475168	0.00418399	0.166	0.176	1
Dnajc19	4.39533e-06	-0.101377	0.661	0.687	0.0808652
Gm42413	0.00420057	0.0647842	0.384	0.359	1
Lpcat3	5.41938e-06	-0.0931319	0.228	0.282	0.0997057
Pde1b	0.00176777	-0.0158298	0.007	0.017	1
Atp13a4	0.0447614	0.0147194	0.016	0.009	1
Pstpip2	0.0497675	0.0788272	0.766	0.746	1
Srsf5	1.88421e-05	-0.089345	0.744	0.774	0.346657
D1Ertd622e	1.0295e-06	-0.105228	0.426	0.466	0.0189408
Pura	0.000181635	0.0273394	0.88	0.844	1
Rtn1	7.00033e-06	0.168179	0.257	0.258	0.128792
Dact3	0.00446262	0.0624701	0.378	0.344	1
Safb	7.31283e-05	0.0814575	0.405	0.351	1
Bcl2l1	7.56799e-07	-0.112793	0.825	0.847	0.0139236
Gstp1	1.83623e-07	-0.134384	0.617	0.652	0.0033783
Rps28	0.000472109	0.0811241	0.921	0.915	1
Arpp21	0.000286314	0.12162	0.164	0.143	1
Mast4	0.0392923	0.037381	0.95	0.963	1
Rtl8b	0.00142087	0.0688958	0.387	0.345	1
Zfp638	9.6021e-07	-0.105379	0.852	0.85	0.0176659
Agpat3	0.00171995	0.0732084	0.565	0.521	1
Eif3j1	0.000267423	0.0081304	0.705	0.667	1
Tmem144	0.0121393	0.0607566	0.456	0.418	1
Galnt7	0.00497063	0.061256	0.579	0.537	1
Mal	1.72559e-09	-0.143461	0.901	0.935	3.17474e-05
Pgp	0.000128233	0.0598821	0.737	0.687	1
Kctd2	0.000232757	0.0547892	0.29	0.244	1
Arrdc2	0.0130734	0.0588296	0.365	0.33	1
Jarid2	0.00274658	-0.01003	0.533	0.508	1
Cyba	7.85622e-05	0.0329724	0.047	0.026	1
Trappc10	0.0161184	0.0259159	0.688	0.656	1
Eci1	0.000533089	0.0589834	0.372	0.324	1
Tjp2	0.000264069	0.00254761	0.697	0.66	1
Nin	0.000245053	0.0483964	0.16	0.126	1
Eef1b2	0.00257755	0.0703262	0.804	0.782	1
St3gal4	0.000219071	-0.0133792	0.375	0.347	1
Cpeb2	1.65333e-05	-0.0801809	0.703	0.704	0.30418
Hes5	9.8239e-09	0.283355	0.135	0.088	0.00018074
Tafa1	3.03308e-10	0.34338	0.16	0.112	5.58027e-06
Pcp4	5.73965e-07	0.0839205	0.116	0.112	0.0105598
C430049B03Rik	6.19186e-09	0.115417	0.084	0.047	0.000113918
Phka1	7.47823e-06	0.115807	0.323	0.29	0.137584
Fxyd6	3.34819e-09	0.159268	0.12	0.08	6.16001e-05
Cmss1	0.00488668	-0.022396	0.98	0.975	1
Chst2	3.4012e-11	0.161564	0.243	0.187	6.25752e-07
C1ql3	4.17195e-05	0.100424	0.216	0.184	0.767555
Spats2	3.10927e-10	0.103248	0.105	0.061	5.72043e-06
Ifi27	2.2282e-06	0.132666	0.53	0.488	0.0409944
Unc13c	1.34049e-07	0.234217	0.151	0.107	0.00246623
C130071C03Rik	8.9088e-12	0.191688	0.392	0.314	1.63904e-07
Ryr3	4.99719e-07	0.154029	0.12	0.081	0.00919383
Sh3bp4	1.03213e-08	0.152632	0.155	0.111	0.000189892
Asic2	4.9882e-08	0.26397	0.16	0.119	0.00091773
Ednrb	6.4284e-09	0.237688	0.162	0.123	0.00011827
Snrnp70	4.52218e-05	0.0978748	0.765	0.723	0.83199
Gm3764	9.9442e-09	0.219761	0.17	0.12	0.000182953
Evi5l	2.21713e-06	0.117634	0.543	0.484	0.0407907
Acap3	1.61514e-08	0.0968357	0.164	0.114	0.000297154
Ncan	1.13782e-09	0.145341	0.156	0.105	2.09335e-05
Traf4	2.64696e-07	0.102611	0.104	0.065	0.00486987
Cntn6	5.47821e-08	0.187743	0.145	0.097	0.00100788
Rnf180	1.74083e-07	0.154792	0.14	0.099	0.00320278
Polg	2.94049e-08	0.107737	0.166	0.116	0.000540992
Jpt1	2.70141e-06	0.0754898	0.106	0.076	0.0497006
Pou2f2	1.05943e-08	0.0692044	0.065	0.031	0.000194914
Neu4	7.29633e-08	0.168881	0.137	0.093	0.00134238
Psmd7	0.00594235	0.0568202	0.581	0.54	1
Mir9-3hg	3.12017e-08	0.239631	0.168	0.118	0.00057405
Gm42418	0.167633	-0.0441503	1	1	1
Susd4	8.14148e-08	0.0994995	0.113	0.07	0.00149787
H2-D1	8.26044e-08	0.0995402	0.243	0.183	0.00151976
Zc3h13	0.124232	0.0254656	0.45	0.425	1
Tcf7l1	0.00181002	0.0497462	0.098	0.072	1
Vps53	0.208888	-0.0272368	0.321	0.331	1
Usp16	0.505603	0.025667	0.348	0.337	1
Fstl5	1.95381e-06	0.0796144	0.073	0.042	0.0359462
Matn4	6.87647e-07	0.171167	0.352	0.302	0.0126513
Zfp57	2.53481e-06	0.0340789	0.038	0.017	0.0466354
Sri	0.0363427	0.0369599	0.491	0.458	1
Gpd1	1.67031e-05	0.101988	0.327	0.283	0.307304
Nlgn3	1.38599e-06	0.100814	0.194	0.143	0.0254994
Flrt1	8.04472e-06	0.0759749	0.113	0.078	0.148007
Pcdh9	2.6419e-06	-0.072798	1	1	0.0486056
Tmod1	1.38121e-06	-0.128174	0.553	0.603	0.0254115
Ppp1r16b	1.15397e-09	-0.151766	0.92	0.948	2.12308e-05
Abcg1	7.60264e-07	-0.114785	0.598	0.644	0.0139873
Phlpp1	3.52378e-08	-0.0959595	0.988	0.995	0.000648305
Mast3	2.26998e-07	-0.106177	0.849	0.886	0.00417631
Acaca	1.58409e-06	-0.125691	0.672	0.694	0.0291441
Ifit3	0.000932798	0.0310436	0.024	0.011	1
Ufl1	0.880919	0.00726833	0.436	0.43	1
Foxp2	1.0675e-05	0.0680201	0.056	0.031	0.196398
Orai1	3.53295e-07	0.111039	0.184	0.147	0.00649993
Arrb1	8.09917e-07	0.0607103	0.062	0.035	0.0149008
Pdzrn4	2.08752e-06	0.0547127	0.145	0.107	0.0384063
Senp2	0.812212	-0.000914004	0.303	0.308	1
Stk24	0.0667763	0.0345428	0.205	0.185	1
Clasp1	0.0406605	0.0497525	0.346	0.322	1
Ndufs8	0.21546	0.0152172	0.479	0.459	1
Dhx57	0.0623033	0.0361456	0.215	0.191	1
Prdx2	2.60283e-05	0.107284	0.636	0.613	0.478868
Marc2	1.52207e-06	0.107553	0.393	0.352	0.028003
Adcyap1r1	7.72352e-07	0.0906229	0.117	0.076	0.0142097
Pak1	7.79878e-07	-0.0893114	0.912	0.938	0.0143482
Tmem121	2.58949e-06	0.0961404	0.192	0.153	0.0476414
Cspg4	2.385e-07	0.223685	0.182	0.138	0.00438792
Gpt2	2.23841e-06	0.134025	0.356	0.307	0.0411823
Tmem100	2.32229e-06	0.199203	0.154	0.113	0.0427255
Cnp	2.58101e-07	-0.0682806	0.931	0.959	0.00474855
Gpr37l1	1.89817e-06	0.198179	0.189	0.144	0.0349225
Plpp3	1.4322e-06	0.124395	0.609	0.544	0.0263496
Trafd1	5.89314e-07	0.0955507	0.328	0.266	0.0108422
Ppp1r14a	1.7555e-07	-0.109615	0.877	0.916	0.00322977
Sdc3	1.94132e-07	0.160453	0.158	0.111	0.00357163
Caskin2	6.69478e-08	0.110049	0.203	0.148	0.00123171
Masp1	1.05808e-07	0.0653766	0.098	0.059	0.00194666
Ttll7	9.42879e-08	-0.0895853	0.932	0.96	0.00173471
Tra2a	1.59864e-07	0.123876	0.75	0.703	0.00294118
Lhfpl3	1.90586e-07	0.32845	0.238	0.179	0.00350641
Lpin2	1.09726e-06	0.06037	0.149	0.106	0.0201873
Plp1	9.76591e-07	-0.0587833	0.945	0.968	0.0179673
Atp1a2	3.75437e-10	0.195934	0.329	0.252	6.9073e-06
Bcan	1.01376e-08	0.236504	0.209	0.149	0.000186512
Afap1l2	1.23171e-06	0.0914727	0.133	0.091	0.0226609
Plppr1	3.15693e-07	0.199609	0.155	0.108	0.00580812
Gpr17	2.39743e-08	0.195072	0.16	0.108	0.000441078
Kcnb2	1.96344e-06	0.140108	0.122	0.082	0.0361233
Plpp4	1.84161e-07	0.158192	0.152	0.103	0.00338819
A230001M10Rik	1.92425e-06	-0.14435	0.681	0.719	0.0354023
Cspg5	1.42684e-10	0.413366	0.284	0.21	2.62511e-06
Marcks	1.10951e-06	0.230506	0.24	0.185	0.0204127
Kcnip3	2.65883e-07	0.206589	0.17	0.122	0.00489172
Etv4	1.21958e-06	0.0756869	0.104	0.066	0.0224379
Cyp2j9	6.63496e-08	0.0989648	0.192	0.138	0.0012207
Rnf13	1.03513e-08	-0.105093	0.944	0.965	0.000190442
Chst11	1.85463e-07	0.201834	0.175	0.123	0.00341215
Casc4	7.37212e-07	0.123244	0.325	0.266	0.0135632
Spon1	1.67278e-06	0.163173	0.171	0.124	0.0307758
Sh3kbp1	4.07185e-07	-0.132361	0.688	0.725	0.00749139
Gria2	1.66228e-06	0.237947	0.285	0.26	0.0305826
Ampd3	2.24483e-06	0.147666	0.158	0.115	0.0413003
Nkain3	2.07617e-07	0.164653	0.144	0.098	0.00381975
Sgcz	1.54242e-06	0.304926	0.176	0.13	0.0283774
H3f3b	8.12668e-08	-0.0993514	0.98	0.989	0.00149515
Car8	6.73957e-07	0.0952379	0.1	0.062	0.0123995
Xylt1	7.32558e-07	0.368419	0.209	0.159	0.0134776
Gpm6a	1.26029e-06	0.22337	0.288	0.244	0.0231869
Inpp4b	4.27601e-07	0.231327	0.167	0.119	0.00786701
Adarb2	6.34639e-07	0.346747	0.258	0.206	0.0116761
C1ql1	6.3604e-07	0.249213	0.154	0.109	0.0117019
Rnf220	9.34833e-08	-0.102922	0.853	0.897	0.00171991
Osbpl1a	1.10126e-08	-0.122572	0.896	0.922	0.000202609
Plekha1	6.19151e-07	-0.126876	0.767	0.782	0.0113911
Grid1	4.0838e-08	0.202616	0.211	0.153	0.000751338
Dbndd2	1.43061e-06	-0.0790104	0.9	0.935	0.0263203
Sox4	1.37682e-07	0.130414	0.138	0.091	0.00253308
Tspan2	2.04279e-09	-0.139853	0.924	0.95	3.75833e-05
Klhl2	6.75918e-08	-0.122927	0.897	0.927	0.00124355
Lrp1	1.6468e-06	0.212154	0.192	0.15	0.0302979
Gabrg1	1.33547e-07	0.0672866	0.087	0.05	0.00245701
Ppfibp1	1.13175e-06	0.176036	0.198	0.151	0.0208219
Frmd4b	9.24964e-09	-0.128135	0.833	0.877	0.000170175
Pcdh10	1.61511e-06	0.1286	0.407	0.347	0.0297149
Pdgfra	1.14249e-06	0.272157	0.181	0.132	0.0210196
Efnb3	3.32039e-08	-0.119959	0.827	0.866	0.000610885
Lpgat1	2.18659e-06	-0.112804	0.801	0.822	0.0402289
Cox17	1.59317e-06	-0.0979194	0.796	0.804	0.0293111
Myo1e	1.4972e-06	-0.122338	0.356	0.4	0.0275454
Dpysl3	2.39174e-06	0.115595	0.136	0.093	0.0440032
Myo10	1.53926e-06	0.113578	0.138	0.095	0.0283194
Mtss2	2.9689e-07	0.175046	0.33	0.279	0.00546217
Celf2	9.38887e-10	0.267102	0.318	0.245	1.72736e-05
Zfp36l1	1.82603e-06	0.161608	0.177	0.13	0.0335953
Zeb1	9.20276e-07	0.366237	0.207	0.157	0.0169312
Arhgap31	2.47684e-07	0.165299	0.559	0.49	0.0045569
Emid1	1.69546e-06	0.146704	0.152	0.107	0.031193
Maf	9.56903e-07	0.0583652	0.075	0.043	0.0176051
Cldn11	5.1334e-10	-0.140985	0.886	0.922	9.44443e-06
Nkain2	8.35047e-08	-0.135097	0.908	0.937	0.00153632
Cpq	9.28883e-07	0.169039	0.194	0.145	0.0170896
Gpx4	2.85134e-07	-0.111301	0.915	0.941	0.00524589
Gm16168	3.52742e-08	-0.195636	0.81	0.843	0.000648975
Slc35f1	6.89858e-08	0.275534	0.284	0.22	0.0012692
Nol4	1.95249e-06	0.145625	0.177	0.129	0.035922
Ptprt	2.27079e-06	0.326685	0.196	0.151	0.0417779
Dlg1	2.20812e-06	-0.0956199	0.894	0.913	0.040625
Spock3	4.98629e-07	-0.161108	0.724	0.776	0.00917378
Ntm	9.15078e-08	0.339003	0.236	0.177	0.00168356
Kank1	5.24634e-09	0.188328	0.236	0.172	9.65222e-05
Olfm2	9.1791e-07	0.164452	0.158	0.111	0.0168877
Gpc5	2.72288e-08	0.370146	0.225	0.164	0.000500956
Pcsk2	1.85751e-06	0.143599	0.321	0.272	0.0341745
Shtn1	2.74157e-06	-0.112567	0.806	0.838	0.0504393
Calcrl	2.79408e-06	0.117211	0.144	0.102	0.0514054
Epb41	2.80064e-06	0.0865008	0.123	0.083	0.0515261
Cacng4	2.88163e-06	0.153735	0.171	0.125	0.0530162
Mertk	1.89505e-06	0.113168	0.153	0.11	0.0348651
Rap1gap	2.95988e-06	0.103792	0.143	0.108	0.0544558
Fam155a	3.02971e-06	0.222014	0.19	0.142	0.0557405
Cacna1c	3.04958e-06	0.163214	0.296	0.24	0.0561062
Cit	5.98005e-06	0.067548	0.079	0.054	0.110021
Khdrbs2	3.06054e-06	0.189899	0.171	0.128	0.0563078
Slc15a2	0.0878944	0.038439	0.207	0.185	1
Cdh13	3.17534e-06	0.225988	0.189	0.147	0.0584199
Rorb	3.24466e-06	0.0577795	0.133	0.095	0.0596952
Sox5	3.29648e-06	0.256151	0.191	0.142	0.0606487
Slc13a1	3.29829e-06	-0.10806	0.179	0.23	0.0606819
Cers4	3.35041e-06	0.0845513	0.212	0.161	0.0616409
Prr5l	1.26322e-09	-0.146441	0.884	0.918	2.32407e-05
Dpysl2	3.53778e-06	-0.0774458	0.957	0.974	0.0650881
Trf	3.56077e-06	-0.0436631	0.898	0.933	0.065511
Sept4	3.58327e-06	-0.0758437	0.905	0.933	0.065925
Bmp7	1.68117e-07	0.058154	0.066	0.034	0.00309302
Kcnk2	3.72084e-06	0.118698	0.134	0.096	0.068456
St18	3.75527e-06	-0.0753145	0.889	0.923	0.0690894
Mfhas1	3.7857e-06	0.0511891	0.091	0.058	0.0696492
Fgf14	3.90225e-06	0.299208	0.187	0.139	0.0717936
Mmd2	3.98714e-06	0.120478	0.179	0.135	0.0733554
Igfbp3	4.04427e-06	0.0313115	0.058	0.035	0.0744064
Cox7c	4.04604e-06	-0.0902212	0.963	0.974	0.0744391
Kcnip1	4.05527e-06	0.145503	0.147	0.104	0.0746089
Pgap2	0.0231999	0.0295022	0.404	0.372	1
Sntg1	4.22234e-06	0.314728	0.185	0.142	0.0776826
Mog	4.24571e-06	-0.0749485	0.883	0.92	0.0781126
Sema3d	4.25879e-06	0.182954	0.256	0.206	0.0783531
Mag	4.26525e-06	-0.00502933	0.888	0.925	0.078472
Pde4b	4.3006e-06	-0.073435	0.998	0.999	0.0791224
Spred2	4.31197e-06	0.101106	0.207	0.16	0.0793317
Pdzd2	4.4705e-06	0.110854	0.134	0.093	0.0822483
Pabpn1	4.77227e-06	0.103804	0.678	0.625	0.0878003
Adipor2	4.89734e-06	-0.0937874	0.885	0.914	0.0901013
Tsc22d1	5.04403e-06	0.159124	0.237	0.186	0.0928
Tmem176b	5.08582e-06	0.205641	0.153	0.117	0.093569
Cox6c	5.29342e-06	-0.0928266	0.969	0.977	0.0973884
Lcorl	5.36611e-06	-0.0542555	0.727	0.704	0.0987257
Lars2	5.40361e-06	-0.0355689	0.702	0.671	0.0994156
Megf11	5.43981e-06	0.188601	0.17	0.128	0.100082
Mbp	5.5156e-06	-0.0591996	0.918	0.947	0.101476
Vwc2	5.55357e-06	0.097349	0.094	0.061	0.102175
Gm46367	0.0035959	0.0492142	0.178	0.153	1
Nrg3	5.64762e-06	0.286599	0.183	0.138	0.103905
Grm3	5.68566e-06	-0.0365299	0.882	0.92	0.104605
Olfml3	5.75476e-06	0.0356145	0.045	0.022	0.105876
Fth1	5.79343e-06	-0.0759731	0.977	0.987	0.106587
Stmn4	5.82237e-06	-0.0911586	0.924	0.946	0.10712
Wsb1	3.64011e-06	0.0884947	0.211	0.171	0.0669708
Meg3	6.07589e-06	0.150848	0.173	0.144	0.111784
Tox3	6.09245e-06	0.104471	0.156	0.112	0.112089
Rgs10	6.1664e-06	0.0475787	0.067	0.039	0.113449
Prune2	6.17744e-06	0.0944122	0.178	0.136	0.113653
Tspan13	6.296e-06	0.0939549	0.129	0.09	0.115834
Sned1	6.29878e-06	-0.0802991	0.135	0.18	0.115885
Nmnat2	6.51973e-06	0.1768	0.159	0.122	0.11995
Gria3	6.66981e-06	0.186042	0.18	0.137	0.122711
Gna11	0.000114661	0.0680125	0.418	0.364	1
Plce1	7.03623e-06	0.137579	0.124	0.087	0.129453
Epn2	7.1184e-06	0.165706	0.948	0.937	0.130964
Fip1l1	7.16716e-06	0.108655	0.591	0.532	0.131861
Pmepa1	7.1692e-06	0.101583	0.207	0.159	0.131899
Arap2	7.24134e-06	-0.119908	0.834	0.868	0.133226
Med15	0.410253	0.0243578	0.291	0.277	1
Thsd7b	7.35041e-06	0.125533	0.121	0.084	0.135233
Fus	0.638851	0.0186121	0.805	0.796	1
Slc1a2	7.47827e-06	0.151388	0.577	0.517	0.137585
Ptch1	7.50152e-06	0.103215	0.491	0.43	0.138013
Ly86	7.8715e-06	0.043779	0.051	0.027	0.14482
Dok6	7.8785e-06	0.152526	0.161	0.118	0.144949
Syngr1	9.78699e-06	0.0779033	0.207	0.167	0.180061
Spock2	8.05986e-06	0.0706498	0.131	0.091	0.148285
Gm38505	8.10617e-06	0.127901	0.212	0.163	0.149137
Zeb2	6.97096e-09	-0.118888	0.995	0.995	0.000128252
Itch	8.4602e-06	-0.0939121	0.877	0.903	0.155651
Kcnd3	8.74071e-06	0.128288	0.14	0.099	0.160812
Zfp74	0.0665212	0.0251858	0.22	0.198	1
Nav2	8.91229e-06	0.177094	0.513	0.47	0.163968
Magi2	8.96373e-06	-0.0721019	1	1	0.164915
Enpp2	9.09389e-06	-0.0675319	0.988	0.994	0.167309
Rgcc	9.09966e-06	0.203071	0.2	0.157	0.167415
Plekho1	9.3604e-06	0.0539882	0.076	0.047	0.172213
Dab1	9.54149e-06	0.135172	0.295	0.241	0.175544
Cdr1os	9.62673e-06	0.102769	0.127	0.105	0.177113
Sgcd	9.68435e-06	0.272865	0.18	0.135	0.178173
Olig2	9.71289e-06	0.130658	0.679	0.624	0.178698
Arhgef1	0.00414067	0.0530496	0.22	0.191	1
S1pr2	9.86698e-06	0.0426608	0.056	0.031	0.181533
Erbin	9.8875e-06	-0.107144	0.931	0.944	0.18191
Tshz2	1.01837e-05	0.134149	0.141	0.101	0.187359
Pcdh7	1.04031e-05	0.216098	0.31	0.256	0.191397
Cmtm5	1.04677e-05	-0.0890988	0.914	0.938	0.192585
Fnbp1l	6.67164e-06	0.0756278	0.103	0.073	0.122745
Evi5	1.06701e-05	0.0814653	0.181	0.136	0.196308
Tdp1	0.0015582	0.0451749	0.125	0.096	1
Slc13a5	1.08159e-05	0.0591871	0.091	0.063	0.198992
Ramp1	1.08995e-05	0.165388	0.194	0.15	0.200529
Dpp6	1.09215e-05	0.231872	0.201	0.159	0.200934
Itga9	1.09371e-05	0.0994956	0.131	0.092	0.201222
Tenm1	1.0989e-05	0.199773	0.161	0.118	0.202175
Rbfox1	1.09902e-05	0.296825	0.192	0.154	0.202197
Arhgap23	1.11757e-06	-0.103626	0.854	0.884	0.020561
Tnr	1.1267e-05	0.331587	0.19	0.144	0.207291
Chadl	1.14868e-05	0.0891612	0.193	0.15	0.211333
Ddah2	3.622e-07	0.0789017	0.165	0.135	0.00666376
Agbl4	1.17154e-05	0.0793282	0.102	0.069	0.215539
Gm20754	1.1777e-05	0.206568	0.193	0.154	0.216672
Rcn1	1.19288e-05	0.0551456	0.068	0.04	0.219466
Mbnl2	1.20643e-05	-0.0684165	0.972	0.985	0.221958
Nrxn2	1.23282e-05	0.16875	0.497	0.479	0.226813
Rtl4	1.23948e-05	0.147696	0.135	0.096	0.228039
Lrfn2	1.23968e-05	0.0745363	0.076	0.047	0.228076
Csrp1	1.24865e-05	-0.0826279	0.915	0.938	0.229727
Csmd1	1.25086e-05	0.36276	0.217	0.173	0.230133
Mif	1.26328e-05	-0.108204	0.847	0.855	0.232419
Xrcc6	0.304896	0.00753082	0.345	0.328	1
Fchsd2	1.28308e-05	0.200455	0.261	0.218	0.236061
Lnx1	1.28723e-05	0.0789793	0.122	0.084	0.236825
Dgkb	1.30622e-05	0.203009	0.18	0.14	0.240318
Tmsb4x	1.31907e-05	-0.0978924	0.991	0.995	0.242682
Pid1	1.33484e-05	0.203706	0.193	0.147	0.245584
Itm2a	1.36681e-05	0.0435384	0.054	0.03	0.251465
Zdhhc2	1.37597e-05	0.132628	0.194	0.153	0.25315
Ece1	1.38758e-05	0.0449967	0.093	0.061	0.255287
Pde8a	1.39524e-05	-0.0873023	0.868	0.904	0.256697
Ccdc127	1.40706e-05	0.0841	0.355	0.301	0.25887
Pkp4	1.42166e-05	-0.0992212	0.84	0.87	0.261557
Snx6	1.51849e-05	-0.083091	0.679	0.696	0.279372
Pcmtd2	1.5426e-05	0.102602	0.443	0.385	0.283808
Blvra	0.061652	0.0257195	0.219	0.196	1
Kcnh5	1.5661e-05	0.0759167	0.141	0.101	0.288132
Nrcam	1.56713e-05	0.165379	0.188	0.143	0.288321
3110056K07Rik	1.57448e-05	0.0749988	0.222	0.181	0.289673
Diras1	1.58419e-05	-0.0301122	0.019	0.039	0.291459
Lrrfip1	1.59177e-05	0.122366	0.141	0.103	0.292854
Clasp2	1.59419e-05	-0.0612088	0.969	0.982	0.293298
Nrxn1	1.59684e-05	0.435465	0.387	0.361	0.293786
B3gat2	1.63285e-05	0.099192	0.131	0.093	0.300412
Akr1b10	1.67501e-05	0.0314383	0.033	0.014	0.308168
Egfem1	1.691e-05	0.167263	0.132	0.093	0.311109
4930420G21Rik	1.69387e-05	-0.136289	0.418	0.477	0.311639
Mgat5b	1.72135e-05	0.0690535	0.092	0.06	0.316694
Pcdh19	1.74546e-05	0.0268432	0.074	0.049	0.321129
Trp53bp2	1.9178e-05	-0.0989421	0.549	0.576	0.352836
Ppp1r14c	1.97196e-05	0.108349	0.137	0.098	0.3628
Adgrl3	2.00026e-05	0.237047	0.522	0.479	0.368008
Plekhg1	9.99115e-08	-0.141144	0.753	0.799	0.00183817
Slc12a2	2.00607e-05	-0.0618048	0.935	0.959	0.369077
Tulp4	2.01482e-05	-0.0924852	0.912	0.936	0.370687
Fads2	2.05526e-05	0.0738865	0.114	0.081	0.378127
Grin3a	2.09732e-05	0.181918	0.179	0.135	0.385865
Alcam	2.11621e-05	0.108015	0.713	0.659	0.38934
Clu	2.12801e-05	0.117038	0.358	0.303	0.391511
Nxph1	6.54884e-07	0.341233	0.183	0.133	0.0120485
Enah	2.19372e-05	0.131936	0.526	0.472	0.4036
Ophn1	2.20107e-05	0.0910093	0.124	0.087	0.404953
Rab3c	2.21477e-05	0.0889182	0.119	0.083	0.407473
Pls1	2.21695e-05	-0.0882107	0.796	0.809	0.407874
Smoc1	2.21854e-05	0.101281	0.228	0.181	0.408167
Ndufb7	2.22155e-05	-0.0837051	0.774	0.778	0.408722
Cdk4	2.24613e-05	0.0750639	0.29	0.254	0.413243
Gin1	0.00236079	0.0530116	0.173	0.144	1
Pcolce2	2.27872e-05	-0.123223	0.452	0.494	0.41924
Myt1l	2.27877e-05	0.138145	0.14	0.105	0.419247
Tmeff2	2.64383e-07	-0.111587	0.985	0.988	0.00486412
Gng11	2.32212e-05	-0.12996	0.826	0.858	0.427223
Dpp10	2.35447e-05	0.22626	0.184	0.15	0.433175
Igsf21	2.37395e-05	0.0789313	0.109	0.075	0.43676
A930009A15Rik	2.39048e-05	0.0786927	0.096	0.064	0.439801
Zfp869	3.17279e-06	0.078892	0.266	0.223	0.0583729
Sema5b	2.52125e-05	0.112944	0.127	0.09	0.463859
Timp3	2.54261e-05	0.0853348	0.193	0.148	0.46779
Ablim2	2.55442e-05	-0.121679	0.485	0.524	0.469962
Gm22146	2.59051e-05	-0.0351585	0.04	0.066	0.476603
Tshz3	8.80975e-06	0.106388	0.176	0.131	0.162082
Tspan7	2.6069e-05	0.0930362	0.616	0.557	0.479618
Gabrb1	2.62285e-05	0.162743	0.15	0.114	0.482552
Cp	2.64559e-05	0.0809936	0.142	0.103	0.486735
Crebzf	2.66043e-05	0.0823519	0.41	0.354	0.489467
Serpine2	1.02897e-06	0.260885	0.227	0.177	0.0189311
Arf4	2.72673e-05	0.0862099	0.494	0.435	0.501664
Ocrl	2.77123e-05	0.0938525	0.274	0.242	0.50985
Ltbp3	8.23598e-05	0.038234	0.058	0.034	1
Sox2	2.85369e-05	0.0935088	0.385	0.329	0.525023
Ier5	2.86131e-05	0.0420368	0.068	0.044	0.526425
Fat3	2.98606e-05	0.134909	0.155	0.114	0.549376
Prdx1	3.00278e-05	-0.0913409	0.949	0.964	0.552451
Cntn4	3.02767e-05	0.254493	0.255	0.225	0.55703
Luzp1	3.04263e-05	0.0589201	0.143	0.104	0.559784
Gpc6	1.76993e-06	0.244139	0.183	0.135	0.0325631
Gm32509	3.06588e-05	0.11255	0.147	0.108	0.56406
Gas7	3.07082e-05	-0.117275	0.634	0.674	0.56497
Samd12	3.09745e-05	0.169117	0.172	0.131	0.569868
Pde7b	3.10642e-05	0.147777	0.158	0.117	0.571519
2610035D17Rik	3.20385e-05	0.10916	0.696	0.644	0.589444
Ccl4	3.26443e-05	0.0315399	0.046	0.024	0.60059
Trpm3	3.34215e-05	0.108003	0.159	0.118	0.614889
Galnt3	3.3805e-05	0.0788272	0.095	0.065	0.621944
Myt1	3.49593e-05	0.121343	0.133	0.096	0.643182
Sdk1	3.50853e-05	0.113974	0.129	0.093	0.645499
Pxdc1	3.52443e-05	0.0646004	0.091	0.06	0.648424
Dnajb11	3.52569e-05	0.0818904	0.415	0.361	0.648657
Lair1	3.52871e-05	0.0220536	0.019	0.006	0.649213
Snhg20	3.56178e-05	0.079052	0.28	0.234	0.655295
Insc	3.56718e-05	-0.0980899	0.512	0.565	0.65629
Nrg2	3.59366e-05	0.0821639	0.109	0.076	0.661161
Kcnk10	3.70241e-05	0.11209	0.117	0.082	0.68117
Rgs7	3.71113e-05	0.161799	0.167	0.127	0.682774
Mllt3	3.71194e-05	0.103409	0.373	0.318	0.682922
Tafa4	3.72922e-05	0.0615147	0.069	0.043	0.686102
Cbr3	3.74688e-05	0.0461695	0.06	0.035	0.689352
Srsf10	3.74945e-05	0.0880123	0.456	0.405	0.689824
Dscaml1	3.76576e-05	0.118497	0.922	0.905	0.692824
Ywhaq	3.76735e-05	-0.0555543	0.957	0.975	0.693117
Brinp1	3.79521e-05	0.196959	0.179	0.137	0.698242
Dcx	3.8392e-05	0.0455109	0.076	0.049	0.706335
Gm29514	3.84906e-05	0.0702643	0.111	0.078	0.708149
Rhbdd3	3.8817e-05	0.043093	0.081	0.052	0.714154
Sez6l	3.91191e-05	0.115139	0.13	0.098	0.719713
Jund	3.94671e-05	-0.105248	0.927	0.936	0.726116
Prima1	3.97263e-05	-0.101192	0.362	0.404	0.730885
Ugdh	4.03472e-05	0.0920737	0.212	0.168	0.742308
G0s2	4.0865e-05	0.122445	0.24	0.2	0.751835
Ccdc13	4.11063e-05	-0.074194	0.197	0.244	0.756274
Cul9	0.00197618	0.053999	0.213	0.177	1
Prkg1	4.17007e-05	0.215054	0.176	0.136	0.76721
Sfpq	4.18909e-05	0.0800829	0.712	0.658	0.770709
Igfbp2	4.21594e-05	0.0407764	0.041	0.021	0.775649
Eif1	4.25429e-05	-0.0527815	0.978	0.991	0.782704
Gm41492	4.37506e-05	-0.0454329	0.035	0.059	0.804923
Rims1	4.46603e-05	0.20264	0.21	0.168	0.82166
Cnot3	4.47518e-05	0.0682041	0.387	0.331	0.823344
Dtx1	9.57911e-07	0.0537363	0.071	0.042	0.0176236
Ostc	4.56363e-05	0.0846647	0.43	0.376	0.839617
Klhl4	4.74024e-05	-0.102269	0.414	0.472	0.87211
Fbln2	1.13962e-06	0.031733	0.028	0.009	0.0209667
Tmem176a	4.75776e-05	0.143874	0.133	0.1	0.875333
Kctd13	4.80169e-05	-0.0487066	0.875	0.911	0.883415
Vsir	4.82064e-05	0.0337296	0.045	0.024	0.886902
Dlgap1	4.84851e-05	0.267769	0.215	0.175	0.892029
Fam181b	4.91588e-05	0.0689607	0.081	0.054	0.904423
Lrrtm4	1.37358e-06	0.407278	0.192	0.147	0.0252711
Itpr2	5.13546e-05	0.151938	0.285	0.24	0.944822
Psmc6	5.17636e-05	0.082149	0.613	0.561	0.952346
Rgs20	5.27341e-05	0.122092	0.125	0.091	0.970202
Ctsd	5.31797e-05	0.0915256	0.611	0.562	0.978401
Nrxn3	5.34012e-05	0.276736	0.203	0.171	0.982475
Sox11	5.39519e-05	0.0295269	0.075	0.051	0.992606
Xaf1	5.39957e-05	-0.100659	0.406	0.441	0.993413
Tsc22d4	5.40484e-05	-0.0861769	0.955	0.968	0.994383
Ckap4	4.128e-05	0.0363793	0.04	0.02	0.759469
Pcdh15	6.26113e-07	0.303488	0.613	0.557	0.0115192
Dscam	9.25719e-07	0.335366	0.287	0.232	0.0170314
Arrdc3	4.31277e-07	-0.132435	0.807	0.842	0.00793463
Sik3	9.25661e-07	-0.120729	0.956	0.967	0.0170303
Kcnd2	1.70066e-07	0.389524	0.212	0.155	0.00312887
Kif13a	6.9712e-07	-0.11619	0.881	0.89	0.0128256
Tmem63b	2.39406e-06	0.0958754	0.398	0.335	0.044046
Tmem88b	2.00415e-06	-0.101927	0.812	0.852	0.0368724
0610005C13Rik	0.53655	-0.00233057	0.003	0.004	1
0610006L08Rik	0.562052	-0.00111631	0.001	0.001	1
0610009B22Rik	0.0659299	0.0193626	0.306	0.283	1
0610009E02Rik	0.017469	0.0165958	0.024	0.014	1
0610009L18Rik	0.127297	-0.0204182	0.087	0.102	1
0610010F05Rik	0.012917	0.0293542	0.326	0.294	1
0610010K14Rik	0.00648169	0.0410948	0.298	0.263	1
0610012G03Rik	0.955352	0.00326276	0.386	0.382	1
0610030E20Rik	0.555412	0.00711266	0.183	0.183	1
0610040B10Rik	0.0867282	-0.014098	0.097	0.111	1
0610040F04Rik	0.949795	0.000894428	0.006	0.005	1
0610040J01Rik	0.0122188	0.0645594	0.127	0.103	1
0610043K17Rik	0.0710464	0.0214745	0.077	0.062	1
1010001B22Rik	0.547457	-0.00361205	0.024	0.025	1
1110002J07Rik	0.0414014	0.00269081	0.003	0.001	1
1110002L01Rik	0.264532	-0.0196864	0.096	0.109	1
1110002O04Rik	0.840037	-0.000735301	0.016	0.017	1
1110004F10Rik	0.00106358	0.0789595	0.638	0.598	1
1110006O24Rik	0.393775	0.00186866	0.006	0.005	1
1110008P14Rik	0.390958	0.02018	0.169	0.156	1
1110012L19Rik	0.227066	0.0193221	0.111	0.098	1
1110013H19Rik	0.755359	-0.00196074	0.004	0.006	1
1110017D15Rik	0.900346	0.00254932	0.016	0.015	1
1110018N20Rik	0.124853	0.00183368	0.005	0.005	1
1110019D14Rik	0.0625484	-0.051357	0.122	0.138	1
1110020A21Rik	0.500066	0.000661956	0.043	0.045	1
1110028F11Rik	0.996311	-0.00010354	0.001	0.001	1
1110032A03Rik	0.834135	-0.0078194	0.272	0.278	1
1110032F04Rik	0.997129	0.000161095	0.003	0.003	1
Pacsin3	0.00700658	0.0504852	0.251	0.224	1
1110038B12Rik	0.414808	0.0162634	0.096	0.088	1
1110038F14Rik	0.00865887	0.0443766	0.303	0.286	1
1110046J04Rik	0.987585	0.00186462	0.087	0.086	1
1110051M20Rik	0.299808	-0.0135621	0.443	0.437	1
1110059E24Rik	0.94012	0.00478602	0.356	0.353	1
1110059G10Rik	0.129154	0.0312923	0.246	0.224	1
1110065P20Rik	0.607465	0.013044	0.481	0.468	1
1190005I06Rik	0.391001	0.0272923	0.488	0.473	1
1190007I07Rik	0.497452	0.0111189	0.135	0.126	1
1300002E11Rik	0.253169	0.0156623	0.13	0.124	1
1300014J16Rik	0.56078	-0.000206869	0.002	0.002	1
1300017J02Rik	0.555999	-0.00495015	0.026	0.03	1
1500002C15Rik	0.678117	-0.00256543	0.005	0.007	1
1500002F19Rik	0.921735	0.000736069	0.003	0.002	1
1500004A13Rik	0.000955629	-0.0685874	0.705	0.707	1
1500009C09Rik	0.376329	0.00986726	0.038	0.032	1
1500009L16Rik	0.628389	0.00586462	0.016	0.014	1
1500011B03Rik	0.0449484	0.00209031	0.349	0.334	1
1500015A07Rik	0.0526693	0.0184759	0.053	0.044	1
1500015L24Rik	0.122723	-0.0369699	0.3	0.31	1
1500026H17Rik	0.0804222	0.012996	0.084	0.071	1
1500032F14Rik	0.116135	0.00366821	0.004	0.001	1
1500035N22Rik	0.607767	0.00171343	0.003	0.002	1
1600002K03Rik	0.659473	0.00443139	0.056	0.052	1
1600010M07Rik	0.459248	0.0138842	0.117	0.114	1
1600012H06Rik	0.732315	0.00703147	0.145	0.138	1
1600014C10Rik	0.0775958	0.0196946	0.057	0.045	1
1600014C23Rik	0.872303	0.000805548	0.002	0.001	1
1600020E01Rik	0.0837663	0.0415058	0.231	0.208	1
1700001D01Rik	0.921426	-0.000712812	0.002	0.002	1
1700001G11Rik	0.354179	-0.00431815	0.018	0.02	1
1700001K19Rik	0.452764	-0.00280181	0.003	0.005	1
1700001K23Rik	0.997129	0.000161095	0.003	0.003	1
1700001L19Rik	0.329038	-0.0035722	0.005	0.007	1
1700001O22Rik	0.695546	0.00328518	0.01	0.009	1
1700001P01Rik	0.104461	0.00413899	0.004	0.001	1
1700003E16Rik	0.184601	-0.00182569	0.002	0.004	1
1700003F12Rik	0.782553	-0.00118451	0.002	0.002	1
1700003G18Rik	0.220986	0.00399573	0.005	0.002	1
1700003M07Rik	0.250838	0.00341883	0.005	0.004	1
1700007J10Rik	0.937273	0.000701364	0.003	0.002	1
1700007K13Rik	0.996311	-0.00010354	0.001	0.001	1
1700007L15Rik	0.277537	-0.00964515	0.021	0.027	1
1700008J07Rik	0.454263	0.00701877	0.031	0.026	1
1700008O03Rik	0.210851	0.00615716	0.012	0.008	1
1700010I14Rik	0.83937	-0.00269702	0.01	0.012	1
1700010K24Rik	0.64397	0.00490246	0.018	0.015	1
1700011L22Rik	0.926545	0.000390078	0.005	0.005	1
1700012B09Rik	0.274779	0.00185381	0.002	0	1
1700012D14Rik	0.741444	-0.0185244	0.159	0.164	1
1700012I11Rik	0.415292	-0.00010354	0.001	0.001	1
1700013F07Rik	0.960364	0.000368469	0.001	0.001	1
1700013M08Rik	0.686073	0.00120731	0.003	0.002	1
1700015F17Rik	0.505339	0.00218451	0.003	0.002	1
1700015H07Rik	0.974443	0.000333848	0.002	0.001	1
1700016D06Rik	0.324804	0.00269081	0.003	0.001	1
1700016J18Rik	0.354109	0.00385285	0.006	0.004	1
1700016K05Rik	0.0229166	0.00702533	0.01	0.005	1
1700016K19Rik	0.934774	0.000403113	0.001	0.001	1
1700016P03Rik	0.692617	0.00160839	0.004	0.002	1
1700017B05Rik	0.45869	0.00762061	0.029	0.024	1
1700018A04Rik	0.350772	-0.0015545	0	0.001	1
1700018L02Rik	0.935039	0.00115698	0.017	0.016	1
1700019A02Rik	0.604389	-0.00545634	0.02	0.022	1
1700019D03Rik	0.34106	0.0191327	0.107	0.097	1
1700019L13Rik	0.101294	0.00745641	0.01	0.005	1
Tbcel	0.449908	0.0188002	0.273	0.263	1
1700020L24Rik	0.0826756	-0.00667293	0.031	0.033	1
1700020N01Rik	0.845509	0.0011028	0.004	0.003	1
1700021F05Rik	0.0375788	0.029604	0.119	0.104	1
1700021N21Rik	0.575424	-0.00017245	0.002	0.001	1
1700022A22Rik	0.482312	-0.00219587	0.002	0.003	1
1700022H01Rik	0.0499029	0.0055504	0.004	0.001	1
1700022I11Rik	0.536257	0.00264268	0.013	0.011	1
1700022N22Rik	0.253302	0.0037876	0.011	0.008	1
1700023F06Rik	0.610989	-0.00189326	0.004	0.005	1
1700023H06Rik	0.19372	0.00740922	0.015	0.01	1
1700024B18Rik	0.30175	0.00671829	0.018	0.014	1
1700025G04Rik	0.166908	0.0612367	0.479	0.464	1
1700026F02Rik	0.763581	0.000875122	0.001	0.001	1
1700026N04Rik	0.495748	-0.000138006	0.001	0.001	1
1700027H10Rik	0.639616	0.00404131	0.013	0.011	1
1700028E10Rik	0.0621094	-0.0305029	0.089	0.097	1
1700028J19Rik	0.566699	0.00244374	0.005	0.004	1
1700028K03Rik	0.582313	-0.00472981	0.011	0.013	1
1700028P14Rik	0.386815	0.00185381	0.001	0	1
1700029H14Rik	0.464916	0.000299251	0.002	0.001	1
1700029I15Rik	0.593389	-0.00233057	0.003	0.005	1
1700029J07Rik	0.855053	0.00274692	0.066	0.063	1
1700030C12Rik	0.703339	0.000736069	0.002	0.002	1
1700030J22Rik	0.421356	0.00287824	0.005	0.004	1
1700030K09Rik	0.0319111	0.0222003	0.129	0.11	1
1700030L22Rik	0.685471	-0.00266574	0.006	0.008	1
1700030N03Rik	0.398708	0.000333848	0.002	0.001	1
1700034H15Rik	0.104461	0.00413899	0.004	0.001	1
1700034I23Rik	0.990084	-0.000275639	0.003	0.003	1
1700034J05Rik	0.66383	0.000264677	0.002	0.002	1
1700034P13Rik	0.822975	0.00627091	0.027	0.025	1
1700036A12Rik	0.447261	0.00124268	0.011	0.011	1
1700037C18Rik	0.867696	0.00400051	0.069	0.066	1
1700037F03Rik	0.918706	0.00196737	0.013	0.012	1
1700037H04Rik	0.678466	0.00796639	0.056	0.051	1
1700039M10Rik	0.0964387	0.00131202	0.002	0.001	1
1700040D17Rik	0.184046	0.00698021	0.014	0.01	1
1700040L08Rik	0.651323	0.000333848	0.001	0.001	1
1700041B01Rik	0.613159	-0.00196074	0.004	0.005	1
1700041G16Rik	0.729522	0.00270183	0.007	0.005	1
1700042O10Rik	0.00729796	-0.0381537	0.052	0.069	1
1700047A11Rik	0.416363	-0.00347273	0.004	0.006	1
1700047I17Rik2	0.814152	0.00120731	0.003	0.002	1
1700047K16Rik	0.434399	0.00197373	0.004	0.004	1
1700047M11Rik	0.0140888	-0.0521619	0.719	0.734	1
1700048M11Rik	0.491879	-0.00219587	0.002	0.003	1
1700048O20Rik	0.148604	0.00852448	0.012	0.008	1
1700052K11Rik	0.0897731	-0.0102674	0.017	0.025	1
1700054A03Rik	0.357863	-0.00233024	0.007	0.009	1
1700055D18Rik	0.351643	-0.000114097	0.005	0.006	1
1700056E22Rik	0.266589	0.00349734	0.009	0.007	1
1700056N10Rik	0.576965	-0.00132523	0.008	0.009	1
1700057H15Rik	0.0879317	-0.00743338	0.003	0.006	1
1700058P15Rik	0.974443	0.000333848	0.002	0.001	1
1700060J05Rik	0.441512	0.00221972	0.003	0.001	1
1700060O08Rik	0.974443	0.000333848	0.002	0.001	1
1700061G19Rik	0.59577	-0.00172416	0.002	0.003	1
1700063D05Rik	0.0681907	0.029551	0.296	0.294	1
1700063J08Rik	0.992562	0.000355607	0.006	0.006	1
1700064H15Rik	0.854828	-0.00155796	0.005	0.006	1
1700065D16Rik	0.319524	0.0027262	0.002	0.001	1
1700066B17Rik	0.339139	-0.00590673	0.008	0.012	1
1700066B19Rik	0.426827	-0.00243054	0.008	0.01	1
1700066M21Rik	0.0529113	0.0386336	0.256	0.238	1
1700067K01Rik	0.431508	0.00138195	0.001	0	1
1700069B07Rik	0.997129	0.000161095	0.003	0.003	1
1700074H08Rik	0.703797	0.000701364	0.003	0.002	1
1700081N11Rik	0.767585	0.0021628	0.008	0.006	1
1700082M22Rik	0.425673	0.00211416	0.003	0.002	1
1700084C06Rik	0.188223	-0.0193872	0.091	0.101	1
1700084E18Rik	0.614809	0.000562781	0.004	0.004	1
1700084F23Rik	0.605306	0.00211416	0.004	0.002	1
1700085D07Rik	0.48513	0.0129184	0.123	0.114	1
1700086O06Rik	0.75837	-0.00288688	0.026	0.028	1
1700086P04Rik	0.0322958	-0.00962909	0.006	0.011	1
1700087I21Rik	0.923319	0.000666683	0.003	0.002	1
1700087M22Rik	0.0981616	0.0120623	0.02	0.013	1
1700088E04Rik	0.447329	-0.00107145	0.017	0.019	1
1700093J21Rik	0.838426	0.000672571	0.011	0.012	1
1700094D03Rik	0.225685	0.00857301	0.031	0.024	1
1700094J05Rik	0.268631	0.00204389	0.005	0.003	1
1700094M23Rik	0.621208	0.00603485	0.055	0.054	1
1700095J03Rik	0.115577	0.00323285	0.003	0.001	1
1700096K18Rik	0.817228	-0.00678682	0.098	0.103	1
1700099I09Rik	0.757796	-0.00115042	0.001	0.002	1
1700101I11Rik	0.623257	0.00226798	0.007	0.006	1
1700102H20Rik	0.143576	0.00363926	0.009	0.005	1
1700102P08Rik	0.0806839	0.00392424	0.006	0.003	1
1700105P06Rik	0.273818	0.00457607	0.009	0.005	1
1700108F19Rik	0.572776	0.00134698	0.002	0.001	1
1700108J01Rik	0.697232	0.000840323	0.001	0.001	1
1700109G14Rik	0.575424	-0.00017245	0.002	0.001	1
1700109H08Rik	0.0745771	-0.022758	0.078	0.089	1
1700109K24Rik	0.623816	0.0041123	0.012	0.01	1
1700110C19Rik	0.441183	0.00132933	0.006	0.006	1
1700110K17Rik	0.461988	-0.00276586	0.007	0.009	1
1700111E14Rik	0.93176	0.00386916	0.111	0.109	1
1700111N16Rik	0.0956748	0.00326845	0.002	0	1
1700112D23Rik	0.0665852	-0.00733085	0.035	0.032	1
1700112J16Rik	0.258682	-0.00561603	0.005	0.007	1
1700112M02Rik	0.999957	2.33132e-05	0.005	0.005	1
1700113A16Rik	0.503079	0.0109093	0.086	0.08	1
1700113H08Rik	0.665277	0.00131202	0.002	0.001	1
1700120B22Rik	0.679169	0.00204389	0.005	0.003	1
1700120C14Rik	0.589007	-0.00302078	0.023	0.026	1
1700120K04Rik	0.960364	0.000368469	0.001	0.001	1
1700121C08Rik	0.664156	-0.00108218	0.001	0.001	1
1700122E12Rik	0.437401	-0.00216213	0.001	0.003	1
1700123M08Rik	0.323504	0.00942307	0.074	0.065	1
1700123O20Rik	0.330563	0.0194115	0.183	0.173	1
1700124L16Rik	0.901018	0.000770797	0.002	0.002	1
1700125G22Rik	0.431508	0.00138195	0.001	0	1
1700125H20Rik	0.664156	-0.00108218	0.001	0.001	1
1700126G02Rik	0.976316	0.000385707	0.018	0.019	1
1810009A15Rik	0.239984	-0.00884108	0.039	0.043	1
1810010H24Rik	0.0222875	0.0166498	0.03	0.022	1
1810012K08Rik	0.431508	0.00138195	0.001	0	1
1810012K16Rik	0.155196	0.00366821	0.003	0.001	1
1810013D15Rik	0.431508	0.00138195	0.001	0	1
1810013L24Rik	0.980588	-0.00178955	0.37	0.37	1
1810014P07Rik	0.415292	-0.00010354	0.001	0.001	1
1810019N24Rik	0.276523	0.00256114	0.008	0.007	1
1810021B22Rik	0.998859	0.000228008	0.017	0.017	1
1810024B03Rik	0.473092	-0.0119103	0.073	0.078	1
1810026B05Rik	0.0169979	0.05274	0.471	0.448	1
1810030O07Rik	0.453341	-0.0184344	0.173	0.183	1
1810034E14Rik	0.575481	0.0122701	0.075	0.068	1
1810037I17Rik	0.221882	-0.0296652	0.893	0.897	1
1810041H14Rik	0.993813	-0.00017245	0.002	0.002	1
1810044D09Rik	0.0253697	-0.0127771	0.023	0.029	1
1810055G02Rik	0.706027	0.00643119	0.074	0.069	1
1810058I24Rik	0.216289	-0.0278443	0.439	0.444	1
1810059C17Rik	0.845509	0.0011028	0.004	0.003	1
1810059H22Rik	0.267257	-0.00260054	0.001	0.002	1
1810062G17Rik	0.66383	0.000264677	0.002	0.002	1
1810062O18Rik	0.0562784	0.0330159	0.18	0.157	1
1810073O08Rik	0.0113703	-0.00253327	0	0.002	1
2010001A14Rik	0.0336638	-0.0291093	0.089	0.109	1
2010001K21Rik	0.830274	0.000840323	0.002	0.001	1
2010009K17Rik	0.98306	-0.000148391	0.006	0.006	1
2010013B24Rik	0.960364	0.000368469	0.001	0.001	1
2010109A12Rik	0.00931004	0.00138113	0.011	0.008	1
2010110G14Rik	0.763581	0.000875122	0.001	0.001	1
2010110K18Rik	0.721575	-0.00111631	0.001	0.002	1
2010204K13Rik	0.0350998	0.0108896	0.015	0.008	1
2010300C02Rik	0.409999	0.0069113	0.03	0.025	1
2010308F09Rik	0.328262	0.00439722	0.01	0.008	1
2010310C07Rik	0.13992	-0.00478678	0.002	0.005	1
2010315B03Rik	0.71309	-0.00403127	0.119	0.124	1
2010320M18Rik	0.453922	-0.00853976	0.048	0.054	1
2010320O07Rik	0.394728	0.00586462	0.019	0.014	1
2200002D01Rik	0.872303	0.000805548	0.002	0.001	1
2210011C24Rik	0.297895	0.0044481	0.03	0.029	1
2210016F16Rik	0.198851	0.0190764	0.089	0.076	1
2210016L21Rik	0.600058	-0.0131312	0.446	0.447	1
2210406O10Rik	0.867879	0.0021547	0.016	0.015	1
2210408F21Rik	0.327717	-0.00915863	0.057	0.056	1
2210408I21Rik	0.966406	-0.0188548	0.348	0.35	1
2210409D07Rik	0.0161231	-0.0142219	0.033	0.038	1
2210411M09Rik	0.247708	0.000228008	0.016	0.017	1
2210414B05Rik	0.872027	-0.000575703	0.001	0.001	1
2300009A05Rik	0.440857	-0.00731968	0.184	0.193	1
2310002D06Rik	0.842096	-0.000275639	0.002	0.002	1
2310002F09Rik	0.934788	0.00200211	0.011	0.01	1
2310005A03Rik	0.993813	-0.00017245	0.002	0.002	1
2310009A05Rik	0.467343	0.0128526	0.159	0.148	1
2310009B15Rik	0.507981	0.015103	0.132	0.125	1
2310010J17Rik	0.331683	-0.0222296	0.162	0.173	1
2310011J03Rik	0.232069	0.0206851	0.272	0.253	1
2310014F06Rik	0.866827	0.00117245	0.003	0.002	1
2310015A10Rik	0.895814	-0.00164462	0.211	0.21	1
2310016G11Rik	0.278018	0.00177898	0.01	0.01	1
2310022A10Rik	0.546241	-0.00238858	0.07	0.074	1
2310022B05Rik	0.56771	0.0141151	0.327	0.315	1
2310026I22Rik	0.902424	0.00113761	0.003	0.002	1
2310030G06Rik	0.763581	0.000875122	0.001	0.001	1
2310033P09Rik	0.00252243	0.0537454	0.23	0.204	1
2310034G01Rik	0.764184	0.00252602	0.009	0.008	1
2310039H08Rik	0.455478	-0.0147114	0.093	0.102	1
2310039L15Rik	0.296914	0.00720896	0.004	0.002	1
2310040G24Rik	0.62914	-0.00283249	0.007	0.008	1
2310043M15Rik	0.0902607	-0.00768731	0.006	0.011	1
2310043O21Rik	0.960364	0.000368469	0.001	0.001	1
2310047D07Rik	0.56869	0.00211416	0.004	0.002	1
2310057M21Rik	0.143951	0.0159646	0.095	0.082	1
2310058D17Rik	0.470796	0.00441316	0.032	0.028	1
2310061I04Rik	0.193171	0.0219489	0.119	0.104	1
2310068J16Rik	0.538447	0.000814646	0.019	0.019	1
2310074N15Rik	0.396552	-0.00420692	0.007	0.009	1
2410002F23Rik	0.152921	0.0224354	0.143	0.126	1
2410003L11Rik	0.930579	-0.00101995	0.005	0.005	1
2410004B18Rik	0.180367	0.0151319	0.323	0.304	1
2410006H16Rik	0.0267016	0.0373384	0.427	0.395	1
2410021H03Rik	0.219567	-0.00452308	0.028	0.03	1
2410022M11Rik	0.803132	0.00132807	0.041	0.041	1
2410080I02Rik	0.130668	-0.008471	0.009	0.014	1
2410131K14Rik	0.354518	0.0121573	0.057	0.05	1
2500002B13Rik	0.982818	0.000549008	0.009	0.008	1
2500004C02Rik	0.26542	-0.000943625	0.023	0.021	1
2510002D24Rik	0.761168	0.00455068	0.082	0.077	1
2510009E07Rik	0.664614	0.012201	0.24	0.238	1
2510017J16Rik	0.923444	-0.0020647	0.019	0.02	1
2510039O18Rik	0.588224	0.0138139	0.143	0.134	1
2510046G10Rik	0.296398	0.00129456	0.024	0.025	1
2600002D14Rik	0.96159	0.000825158	0.007	0.006	1
2600006K01Rik	0.306295	-0.0020946	0.001	0.002	1
2600014E21Rik	0.28587	0.0131816	0.017	0.012	1
2610001J05Rik	0.617436	0.0146679	0.43	0.417	1
2610002M06Rik	0.770033	0.00118763	0.127	0.123	1
2610008E11Rik	0.635941	0.0171803	0.335	0.324	1
2610020C07Rik	0.517037	0.0206947	0.182	0.174	1
2610021A01Rik	0.0690486	0.0237319	0.152	0.143	1
2610027K06Rik	0.19562	0.0147611	0.051	0.042	1
2610028E06Rik	0.908301	-0.000644304	0.001	0.002	1
2610037D02Rik	0.658916	-0.0179109	0.209	0.217	1
2610044O15Rik8	0.307958	0.016219	0.141	0.133	1
2610203C22Rik	0.0395365	0.0207655	0.031	0.022	1
2610204G07Rik	0.960995	-0.000924335	0.008	0.009	1
2610206C17Rik	0.929002	-0.00116657	0.013	0.013	1
2610301B20Rik	0.612784	-0.0115614	0.129	0.137	1
2610306M01Rik	0.656388	-0.0025361	0.101	0.104	1
2610307P16Rik	0.401914	-0.0069626	0.003	0.004	1
2610316D01Rik	0.137035	0.0241877	0.229	0.209	1
2610507B11Rik	0.0958185	-0.00510322	0.336	0.326	1
2610507I01Rik	0.743546	4.86982e-05	0.076	0.075	1
2610528A11Rik	0.990084	-0.000309989	0.003	0.003	1
2700033N17Rik	0.544903	-0.000218337	0.036	0.038	1
2700038G22Rik	0.0504545	0.00839124	0.033	0.026	1
2700046A07Rik	0.131803	-0.0178788	0.042	0.053	1
2700046G09Rik	0.307662	-0.0120064	0.05	0.057	1
2700049A03Rik	0.77686	0.009685	0.16	0.154	1
2700054A10Rik	0.3552	0.0163564	0.073	0.064	1
2700062C07Rik	0.262129	0.00487928	0.195	0.186	1
2700069I18Rik	0.432971	-0.00176535	0.012	0.014	1
2700081O15Rik	0.0679667	0.0207242	0.06	0.046	1
2700097O09Rik	0.0161471	0.0448785	0.253	0.221	1
2810001G20Rik	0.216223	-0.000143431	0.108	0.114	1
2810002D19Rik	0.0848696	0.0205678	0.066	0.053	1
2810004N23Rik	0.34872	0.00245529	0.316	0.305	1
2810006K23Rik	0.691062	0.00930136	0.086	0.08	1
2810013P06Rik	0.000387942	0.0633703	0.236	0.194	1
2810021J22Rik	0.416097	0.00418976	0.053	0.052	1
2810029C07Rik	0.251435	0.00446869	0.01	0.006	1
2810030D12Rik	0.664156	-0.00108218	0.001	0.001	1
2810032G03Rik	0.170816	-0.00320651	0.001	0.004	1
2810049E08Rik	0.325866	-0.00872051	0.013	0.018	1
2810402E24Rik	0.289123	0.012242	0.06	0.054	1
2810403D21Rik	0.222677	-0.0253893	0.101	0.113	1
2810404M03Rik	0.306295	-0.0020946	0.001	0.002	1
2810405F17Rik	0.702106	0.00798921	0.057	0.053	1
2810407A14Rik	0.415937	-0.0049374	0.007	0.01	1
2810408A11Rik	0.363318	0.00309072	0.004	0.002	1
2810408I11Rik	0.0840037	-0.00642766	0.004	0.008	1
2810410L24Rik	0.242796	-0.0235213	0.202	0.213	1
2810414N06Rik	0.836532	0.000603924	0.012	0.012	1
2810429I04Rik	0.673602	0.0081104	0.15	0.148	1
2810432F15Rik	0.894122	-0.00136342	0.012	0.012	1
2810433D01Rik	0.908301	-0.000644304	0.001	0.002	1
2810442N19Rik	0.288231	-0.00323987	0.002	0.004	1
2810454H06Rik	0.829152	-0.000233175	0.057	0.058	1
2810455O05Rik	0.997498	5.77237e-05	0.004	0.004	1
2810457G06Rik	0.349572	0.00551049	0.014	0.01	1
2810459M11Rik	0.000377875	0.030156	0.038	0.022	1
2810468N07Rik	0.95616	0.00436662	0.688	0.684	1
2900005J15Rik	0.411338	0.000686897	0.008	0.006	1
2900009J06Rik	0.63162	0.00522349	0.014	0.012	1
2900026A02Rik	0.709727	-0.00179645	0.01	0.012	1
2900040C04Rik	0.84444	0.00169401	0.008	0.006	1
2900041M22Rik	0.205618	-0.00374475	0.002	0.005	1
2900042K21Rik	0.960364	0.000368469	0.001	0.001	1
2900045O20Rik	0.763581	0.000875122	0.001	0.001	1
2900052L18Rik	0.00223992	-0.0273184	0.274	0.269	1
2900052N01Rik	0.0180366	0.0230425	0.05	0.039	1
2900060B14Rik	0.714945	0.00515167	0.025	0.022	1
2900060N12Rik	0.415732	0.0104306	0.033	0.028	1
2900076A07Rik	0.621352	0.00435364	0.16	0.162	1
2900079G21Rik	0.113546	0.00206444	0.019	0.015	1
2900089D17Rik	0.864126	-0.00189506	0.008	0.009	1
2900092C05Rik	0.388541	0.00127709	0.002	0.001	1
2900093K20Rik	0.180203	0.0175218	0.103	0.089	1
2900097C17Rik	0.57782	0.0187561	0.446	0.434	1
3010001F23Rik	0.0477702	0.0274301	0.074	0.061	1
3010003L21Rik	0.311457	0.00676183	0.015	0.011	1
3110001I22Rik	0.730764	0.00160545	0.012	0.011	1
3110006O06Rik	0.0165905	0.00236082	0.002	0	1
3110009E18Rik	0.0934148	-0.0277764	0.118	0.133	1
3110021N24Rik	0.333221	0.0229153	0.307	0.29	1
3110039M20Rik	0.0163103	0.0258568	0.038	0.025	1
3110040N11Rik	0.326214	0.00766307	0.067	0.064	1
3110045C21Rik	0.197626	-0.00160465	0.025	0.024	1
3110070M22Rik	0.959703	0.00101719	0.009	0.009	1
3110082I17Rik	0.119948	0.0189391	0.057	0.046	1
3110082J24Rik	0.465452	0.00380542	0.023	0.02	1
3110083C13Rik	0.781061	-0.0048421	0.03	0.033	1
3200001D21Rik	0.668774	-0.000285338	0.007	0.008	1
3222401L13Rik	0.967578	-0.00117812	0.192	0.194	1
3300002A11Rik	0.194745	-0.0120318	0.025	0.032	1
3300002I08Rik	0.755127	-0.00746605	0.128	0.134	1
3300005D01Rik	0.830274	0.000840323	0.002	0.001	1
3632454L22Rik	0.70894	0.000755981	0.007	0.007	1
3830406C13Rik	0.215987	-0.0261373	0.295	0.305	1
3830408C21Rik	0.759191	0.00486802	0.022	0.019	1
4430402I18Rik	0.00374872	0.0328736	0.086	0.064	1
4632404H12Rik	0.287193	-0.00615944	0.042	0.048	1
4632411P08Rik	0.655809	-0.00132063	0.003	0.004	1
4632427E13Rik	0.0292696	0.0443523	0.37	0.337	1
4731419I09Rik	0.921426	-0.000712812	0.002	0.002	1
4732414G09Rik	0.544686	0.00214932	0.003	0.002	1
4732419C18Rik	0.179436	-0.00310219	0.005	0.006	1
4732440D04Rik	0.00816937	0.0343553	0.106	0.083	1
4732463B04Rik	0.166762	0.00824322	0.01	0.006	1
4732471J01Rik	0.417578	0.0335294	0.374	0.362	1
4732487G21Rik	0.15854	0.00214932	0.004	0.002	1
4732491K20Rik	0.912759	0.00167263	0.057	0.056	1
4732496C06Rik	0.934774	0.000403113	0.001	0.001	1
4831440D22Rik	0.280932	0.00946935	0.035	0.028	1
4833408A19Rik	0.77703	-0.00199833	0.019	0.019	1
4833411C07Rik	0.995279	0.000195599	0.003	0.003	1
4833413G10Rik	0.439607	-0.00537559	0.018	0.021	1
4833417C18Rik	0.785291	0.00493803	0.015	0.013	1
4833418N02Rik	0.600559	-0.00515055	0.015	0.019	1
4833420G17Rik	0.0262972	0.0382727	0.348	0.315	1
4833422C13Rik	0.0947507	0.0201534	0.066	0.062	1
4833428L15Rik	0.61107	-0.00236419	0.003	0.005	1
4833438C02Rik	0.249041	0.00778901	0.02	0.015	1
4833439L19Rik	0.548629	-0.0204683	0.41	0.418	1
4921501I09Rik	0.908301	-0.000644304	0.001	0.002	1
4921504A21Rik	0.663016	-0.0151113	0.177	0.186	1
4921507G05Rik	0.654611	-0.00118451	0.002	0.002	1
4921507P07Rik	0.20919	0.00482748	0.006	0.004	1
4921511C10Rik	0.778828	-0.00153982	0.059	0.06	1
4921511I17Rik	0.0709421	0.0092884	0.009	0.005	1
4921516A02Rik	0.617852	-0.00048139	0.004	0.005	1
4921517D16Rik	0.464916	0.000299251	0.002	0.001	1
4921524J17Rik	0.132738	0.0166903	0.181	0.164	1
4921528I07Rik	0.191374	-0.00256691	0	0.002	1
4921531C22Rik	0.853438	-0.00199833	0.018	0.02	1
4921534H16Rik	0.116834	0.00771455	0.006	0.003	1
4922502N22Rik	0.601703	-0.000206869	0.002	0.002	1
4930402H24Rik	0.00405473	-0.060347	0.87	0.872	1
4930403P22Rik	0.150925	0.00493641	0.01	0.007	1
4930404A12Rik	0.960364	0.000368469	0.001	0.001	1
Mpp7	0.00957708	0.0406895	0.073	0.057	1
4930404N11Rik	0.383023	-0.00115586	0.006	0.006	1
4930405A10Rik	0.533847	0.00360374	0.008	0.006	1
4930405A21Rik	0.482006	0.0046142	0.011	0.009	1
4930405J17Rik	0.797906	-0.0023637	0.008	0.01	1
4930405O22Rik	0.350772	-0.0015545	0	0.001	1
4930407G08Rik	0.784537	-0.00125262	0.002	0.003	1
4930408O17Rik	0.0477445	-0.0117927	0.03	0.04	1
Cntrl	0.114387	0.0340259	0.229	0.211	1
4930412L05Rik	0.757796	-0.00115042	0.001	0.002	1
4930413F20Rik	0.448239	0.00214932	0.003	0.002	1
4930414N06Rik	0.311513	0.00855404	0.055	0.051	1
4930415C11Rik	0.676425	0.00368132	0.011	0.009	1
4930415O20Rik	0.416093	0.00221972	0.002	0.001	1
4930417H01Rik	0.985129	-0.000412899	0.004	0.004	1
4930419G24Rik	0.889407	-0.00131513	0.457	0.451	1
4930422M22Rik	0.703267	0.000562781	0.004	0.004	1
4930426I24Rik	0.709297	0.00486802	0.023	0.02	1
4930426L09Rik	0.329741	0.00233821	0.007	0.005	1
4930428E07Rik	0.0954829	0.00706201	0.008	0.004	1
4930428N03Rik	0.77773	0.00124219	0.003	0.002	1
4930429D17Rik	0.000623382	0.000840323	0.002	0	1
4930429F24Rik	0.81818	-0.00145639	0.004	0.005	1
4930430F08Rik	0.00152188	0.0533085	0.26	0.22	1
4930432B10Rik	0.388781	0.00279346	0.013	0.013	1
4930432K21Rik	0.1725	-0.0118244	0.022	0.028	1
4930440I19Rik	0.641289	0.00131202	0.001	0.001	1
4930444A19Rik	0.255397	0.0118073	0.062	0.057	1
4930444F02Rik	0.00196016	0.00377546	0.003	0	1
4930444P10Rik	0.873664	0.0017638	0.006	0.005	1
4930445B16Rik	0.111455	0.0360676	0.093	0.078	1
4930445E18Rik	0.886433	-0.00118451	0.001	0.002	1
4930447A16Rik	0.0651695	0.00786212	0.018	0.015	1
4930447C04Rik	0.697232	0.000840323	0.001	0.001	1
4930447M23Rik	0.671736	5.77237e-05	0.004	0.004	1
4930447N08Rik	0.68869	-0.000275639	0.002	0.002	1
4930452A19Rik	0.983063	0.000230126	0.002	0.002	1
4930452B06Rik	0.0585025	0.0093632	0.009	0.004	1
4930452G13Rik	0.397151	0.0123459	0.057	0.05	1
4930453C13Rik	0.872027	-0.000575703	0.001	0.001	1
4930453N24Rik	0.0430104	0.0404167	0.269	0.241	1
4930455C13Rik	0.202612	0.0060082	0.05	0.05	1
4930455G09Rik	0.0130027	-0.0153554	0.013	0.023	1
4930461C15Rik	0.558082	0.00392965	0.009	0.007	1
4930469K13Rik	0.974949	0.000264677	0.002	0.002	1
Mtmr3	0.460529	0.0224619	0.488	0.472	1
4930471G03Rik	0.202192	0.00323285	0.002	0.001	1
4930471L23Rik	0.43636	0.00162124	0.012	0.014	1
4930473A02Rik	0.0311477	0.0248867	0.07	0.056	1
4930473H19Rik	0.501412	0.00294897	0.006	0.004	1
4930474H06Rik	0.872027	-0.000575703	0.001	0.001	1
4930477G07Rik	0.551013	-0.00233057	0.003	0.004	1
4930478K11Rik	0.895405	-0.000610015	0.001	0.001	1
4930478L05Rik	0.225896	-0.0018634	0.013	0.013	1
4930478M13Rik	0.634753	-0.00487939	0.018	0.021	1
4930479D17Rik	0.345485	-0.00400938	0.004	0.007	1
4930480K15Rik	0.0384233	0.0173029	0.027	0.017	1
4930481A15Rik	0.556435	-0.00267693	0.055	0.058	1
4930481B07Rik	0.769911	-0.00206178	0.005	0.006	1
4930484I04Rik	0.568505	-0.00878007	0.04	0.045	1
4930486F22Rik	0.167869	-0.00313973	0.001	0.003	1
4930488L21Rik	0.264175	-0.0340169	0.133	0.147	1
4930500A05Rik	0.564879	-0.00112192	0.006	0.007	1
4930502E09Rik	0.615493	0.00134698	0.001	0.001	1
4930502E18Rik	0.111437	-0.00307286	0	0.002	1
4930503L19Rik	0.398085	0.0173623	0.106	0.097	1
4930505A04Rik	0.0090402	-0.00928369	0.005	0.011	1
Trnp1	1.07518e-06	0.0635811	0.075	0.043	0.0197812
4930505M18Rik	0.144009	-0.0035722	0.005	0.008	1
4930505N22Rik	0.300533	0.00669636	0.011	0.007	1
4930506C21Rik	0.0729452	-0.0420822	0.211	0.229	1
4930507D05Rik	0.921426	-0.000712812	0.002	0.002	1
4930509G22Rik	0.40533	0.00181868	0.002	0.001	1
4930509H03Rik	0.0753473	0.0280903	0.134	0.115	1
4930509J09Rik	0.00791177	0.0549678	0.067	0.05	1
4930511M06Rik	0.583068	-0.0140307	0.273	0.273	1
4930512B01Rik	0.233723	0.00498805	0.107	0.11	1
4930513D17Rik	0.661066	-0.00442585	0.01	0.012	1
4930515G01Rik	0.782553	-0.00118451	0.002	0.002	1
4930516B21Rik	0.937273	0.000701364	0.003	0.002	1
4930517E14Rik	0.46931	-0.000747031	0.002	0.003	1
4930517O19Rik	0.0744012	0.0350749	0.075	0.06	1
4930520O04Rik	0.573338	0.00218451	0.003	0.002	1
4930522L14Rik	0.223946	0.0115006	0.156	0.143	1
4930523C07Rik	0.885145	-0.000992137	0.008	0.008	1
4930524O07Rik	0.86581	0.00113761	0.004	0.003	1
4930525G20Rik	0.855606	0.000932518	0.013	0.013	1
4930527F14Rik	0.538275	-0.00353286	0.009	0.011	1
4930529K09Rik	0.830274	0.000840323	0.002	0.001	1
4930532G15Rik	0.549878	-0.000856442	0.008	0.008	1
4930532I03Rik	0.475841	0.00529039	0.036	0.031	1
4930533B01Rik	0.0895705	0.0102507	0.019	0.014	1
4930533K18Rik	0.0920111	-0.00940781	0.009	0.013	1
4930534D22Rik	0.763581	0.000875122	0.001	0.001	1
4930537H20Rik	0.505339	0.00218451	0.003	0.002	1
4930539J05Rik	0.166281	-0.0117044	0.031	0.039	1
4930544F09Rik	0.576968	-0.000241266	0.002	0.002	1
4930544I03Rik	0.0202334	0.0259894	0.031	0.02	1
4930545L23Rik	0.566927	0.00508089	0.021	0.018	1
4930546C10Rik	0.531713	-0.000138006	0.001	0.001	1
4930547E14Rik	0.999859	-4.54382e-05	0.005	0.005	1
4930547M16Rik	0.491879	-0.00219587	0.002	0.003	1
4930549C15Rik	0.0413139	0.0319119	0.112	0.092	1
4930549G23Rik	0.0926761	0.00563223	0.108	0.111	1
4930550C14Rik	0.712913	0.00249093	0.009	0.007	1
4930551O13Rik	0.285449	0.00240854	0.006	0.004	1
4930553P18Rik	0.872303	0.000805548	0.002	0.001	1
4930554G24Rik	0.961845	0.000299251	0.002	0.001	1
4930555B11Rik	0.437401	-0.00216213	0.001	0.003	1
4930555F03Rik	0.375094	0.00888489	0.022	0.017	1
4930556G22Rik	0.353641	0.00117245	0.003	0.002	1
4930556J24Rik	0.684891	-0.00898184	0.069	0.073	1
4930556N13Rik	0.85766	0.00344422	0.039	0.038	1
4930557K07Rik	0.000199589	0.0317709	0.051	0.03	1
4930558K02Rik	0.0372841	0.00170185	0.025	0.028	1
4930562C15Rik	0.304596	0.00279705	0.001	0	1
4930562F07Rik	0.644129	-0.00108218	0.001	0.001	1
4930563E18Rik	0.224586	-0.00115042	0.001	0.002	1
4930563E22Rik	0.130551	0.012496	0.029	0.022	1
4930563F08Rik	0.125776	-0.00517871	0.006	0.01	1
4930565N06Rik	0.264102	-0.00426284	0.012	0.013	1
4930567K12Rik	0.659723	-0.000962366	0.033	0.035	1
4930570B17Rik	0.139884	0.0208311	0.049	0.04	1
4930570G19Rik	0.0177888	0.0274703	0.058	0.043	1
4930572G02Rik	0.398738	-9.04037e-05	0.01	0.011	1
4930578G10Rik	0.993813	-0.00017245	0.002	0.002	1
4930578M01Rik	0.190115	0.00746125	0.023	0.017	1
4930578M07Rik	0.0667762	-0.00421645	0.001	0.004	1
4930579G18Rik	0.389659	0.00127726	0.011	0.009	1
4930579G24Rik	0.0702595	-0.0127391	0.017	0.026	1
4930579H20Rik	0.671813	-0.000686309	0.007	0.007	1
4930579K19Rik	0.488832	-0.00390229	0.009	0.011	1
4930579M01Rik	0.895405	-0.000610015	0.001	0.001	1
4930581F22Rik	0.00327733	-0.0590079	0.221	0.257	1
4930583P06Rik	0.991326	-0.000241266	0.002	0.002	1
4930586N03Rik	0.476355	0.0050449	0.017	0.014	1
4930587E11Rik	0.849086	0.00177005	0.025	0.024	1
4930588A03Rik	0.209943	-0.00931475	0.006	0.008	1
4930588J15Rik	0.476381	0.00583196	0.014	0.011	1
4930589L23Rik	0.782928	0.00160839	0.003	0.002	1
4930590J08Rik	0.391348	0.00618856	0.016	0.013	1
4930590L20Rik	0.192811	0.00231582	0.01	0.007	1
4930592A05Rik	0.056521	-0.00403371	0.007	0.011	1
4930593A02Rik	0.917937	0.000173036	0.158	0.155	1
4930594M22Rik	0.676934	-0.00326828	0.006	0.008	1
4930595D18Rik	0.655682	0.00313526	0.007	0.006	1
4930597O21Rik	0.647413	-0.000344316	0.003	0.003	1
4930599N23Rik	0.382611	0.00723435	0.025	0.022	1
4931403E22Rik	0.101132	0.0113836	0.027	0.019	1
4931406C07Rik	0.510245	0.0176621	0.242	0.229	1
4931406G06Rik	0.647413	-0.000344316	0.003	0.003	1
4931406P16Rik	0.17378	-0.0104574	0.727	0.718	1
4931413K12Rik	0.193609	-0.00260054	0.001	0.002	1
4931414P19Rik	0.0354991	0.0220296	0.05	0.039	1
4931415C17Rik	0.95314	0.0023508	0.008	0.008	1
4931423N10Rik	0.0416165	-0.000747031	0.002	0.002	1
4931428F04Rik	0.645825	0.00795574	0.046	0.041	1
4931431B13Rik	0.360742	0.0030198	0.004	0.003	1
4931440F15Rik	0.986366	-0.000378619	0.004	0.004	1
4932412D23Rik	0.200198	-0.00391031	0.004	0.005	1
4932413F04Rik	0.619927	-0.000515601	0.005	0.005	1
4932414N04Rik	0.800413	-0.00121858	0.002	0.003	1
4932422M17Rik	0.0151799	0.0164385	0.027	0.016	1
4932435O22Rik	0.514544	0.00218451	0.003	0.002	1
4932438A13Rik	0.411308	0.0218958	0.585	0.568	1
4932438H23Rik	0.00290978	-0.0246464	0.017	0.029	1
4932441J04Rik	0.334575	0.00836193	0.017	0.013	1
4932443L11Rik	0.153802	0.0310645	0.152	0.145	1
4932702P03Rik	0.386815	0.00185381	0.001	0	1
4933400F21Rik	0.510715	-0.00388273	0.077	0.077	1
4933400L20Rik	0.975911	-0.000583953	0.005	0.005	1
4933402D24Rik	0.515107	-0.00330651	0.002	0.004	1
4933404O12Rik	0.890153	-0.00242657	0.031	0.033	1
4933405D12Rik	0.557808	0.00258478	0.004	0.002	1
4933405L10Rik	0.365504	0.00225496	0.003	0.001	1
4933406B15Rik	0.157374	0.00644788	0.01	0.006	1
4933406B17Rik	0.495748	-0.000138006	0.001	0.001	1
4933406C10Rik	0.876006	0.000737188	0.033	0.032	1
4933406I18Rik	0.0759951	0.0370543	0.066	0.052	1
4933406J10Rik	0.993813	-0.00017245	0.002	0.002	1
4933406P04Rik	0.560501	0.000528193	0.005	0.004	1
4933407E24Rik	0.731156	0.00157343	0.004	0.003	1
4933407I08Rik	0.525993	0.00493641	0.008	0.006	1
Stmn3	5.56914e-06	0.103485	0.207	0.193	0.102461
4933407L21Rik	0.997129	0.000161095	0.003	0.003	1
4933408B17Rik	0.169241	-0.00534109	0.007	0.011	1
4933408N05Rik	0.00251682	0.00181868	0.002	0	1
4933409K07Rik	0.996311	-0.00010354	0.001	0.001	1
4933411O13Rik	0.862453	0.00337943	0.021	0.019	1
4933412E12Rik	0.58819	0.00207901	0.004	0.003	1
4933415A04Rik	0.122247	0.0109878	0.022	0.015	1
4933417D19Rik	0.180537	0.00276161	0.003	0.001	1
4933421A08Rik	0.721575	-0.00111631	0.001	0.002	1
4933421O10Rik	0.0912959	0.00173867	0.056	0.06	1
4933423P22Rik	0.0131854	0.0164106	0.021	0.011	1
4933424G05Rik	0.837265	0.00363074	0.024	0.022	1
4933424G06Rik	0.286545	-0.00206178	0.004	0.006	1
4933424L21Rik	0.428652	-0.00276832	0.002	0.004	1
4933426B08Rik	0.383423	0.00400585	0.014	0.011	1
4933427D06Rik	0.441715	0.00131202	0.002	0.001	1
4933427D14Rik	0.0533722	0.00938126	0.014	0.009	1
4933428G20Rik	0.741756	-0.00303859	0.042	0.043	1
4933428P19Rik	0.0113703	-0.00253327	0	0.002	1
4933429H19Rik	0.700587	0.000805548	0.002	0.001	1
4933430I17Rik	0.988404	0.000195599	0.003	0.002	1
4933431K23Rik	0.813374	0.00146867	0.005	0.004	1
4933432K03Rik	0.884597	0.000736069	0.002	0.002	1
4933433G15Rik	0.315118	-0.0053435	0.018	0.021	1
4933433G19Rik	0.708113	-0.00332421	0.017	0.018	1
4933433H22Rik	0.996311	-0.00010354	0.001	0.001	1
4933434E20Rik	0.826814	-0.00332936	0.387	0.384	1
4933436I20Rik	0.484089	0.00204389	0.002	0.002	1
4933439C10Rik	0.654505	0.00596098	0.031	0.027	1
4933439K11Rik	0.135444	0.00421077	0.002	0	1
5031410I06Rik	0.988761	0.000264677	0.002	0.002	1
5031415H12Rik	0.360762	0.00533094	0.014	0.011	1
5031425E22Rik	0.0258053	0.0418134	0.373	0.339	1
5031434O11Rik	0.080963	0.00846387	0.03	0.026	1
5031439G07Rik	0.000917494	-0.0752895	0.827	0.843	1
5033403F01Rik	0.890035	0.00136413	0.006	0.005	1
5033406O09Rik	0.505289	-0.00497603	0.017	0.021	1
5033417F24Rik	0.509603	0.00239811	0.015	0.013	1
5033421B08Rik	0.000120488	-0.12564	0.18	0.2	1
5033426O07Rik	0.0320434	0.0175555	0.02	0.012	1
5033430I15Rik	0.977556	0.000528193	0.005	0.004	1
5330413P13Rik	0.797085	-0.00216311	0.011	0.012	1
5330416C01Rik	0.388419	0.00432225	0.006	0.004	1
5330417C22Rik	0.333313	0.00120731	0.002	0.002	1
5330434G04Rik	0.204051	-0.0278678	0.404	0.404	1
5330438D12Rik	0.129003	0.0359531	0.344	0.319	1
5330439A09Rik	0.277272	0.000805548	0.002	0.001	1
Zfp276	0.00445799	0.0530549	0.236	0.207	1
5430400D12Rik	0.525012	0.00346192	0.01	0.008	1
5430402O13Rik	0.517385	0.00875944	0.034	0.029	1
5430403G16Rik	0.821627	0.00664287	0.063	0.059	1
5430405H02Rik	0.00107312	0.0645193	0.233	0.195	1
5430414B19Rik	0.729898	0.00230308	0.007	0.005	1
5430416N02Rik	0.059958	-0.0107941	0.072	0.074	1
5430425K12Rik	0.789313	0.00198798	0.009	0.008	1
5430427M07Rik	0.0568387	0.0118197	0.013	0.007	1
5430427O19Rik	0.52817	0.00298437	0.005	0.003	1
5430431A17Rik	0.903673	0.000838079	0.032	0.032	1
5430440P10Rik	0.355788	0.00229022	0.002	0.001	1
5530401A14Rik	0.872303	0.000805548	0.002	0.001	1
5530601H04Rik	0.753533	0.0106433	0.147	0.142	1
5730403I07Rik	0.968382	0.000411491	0.01	0.009	1
5730405O15Rik	0.24902	-0.00179645	0.011	0.013	1
5730409E04Rik	0.353275	0.0149466	0.078	0.068	1
5730414N17Rik	0.108564	0.00719948	0.012	0.007	1
5730419F03Rik	0.327698	0.000368469	0.001	0.001	1
5730455P16Rik	0.780976	-0.011874	0.229	0.237	1
5730480H06Rik	0.313131	0.00422157	0.113	0.115	1
5730507C01Rik	0.581025	0.00174849	0.002	0.001	1
5730522E02Rik	0.00397025	0.0689097	0.08	0.058	1
5830408C22Rik	0.323029	0.00119134	0.017	0.016	1
5830416I19Rik	0.992613	0.000230126	0.003	0.002	1
5830418P13Rik	0.0734367	0.0147192	0.047	0.044	1
5830432E09Rik	0.695892	0.00263144	0.007	0.006	1
5830444B04Rik	0.114883	0.00174849	0.003	0.001	1
5830448L01Rik	0.588346	-0.0023296	0.017	0.018	1
5830454E08Rik	0.311752	-0.000998296	0.012	0.014	1
5830487J09Rik	0.018358	0.00706201	0.009	0.004	1
5930403N24Rik	0.111174	0.00500779	0.004	0.002	1
5930430L01Rik	0.955924	0.000644331	0.02	0.02	1
6030407O03Rik	0.179708	0.028476	0.104	0.09	1
6030442K20Rik	0.0175172	0.0165666	0.051	0.048	1
6030443J06Rik	0.419439	-0.0361573	0.152	0.16	1
6030458C11Rik	0.00316931	0.0449125	0.14	0.117	1
6030466F02Rik	0.996311	-0.00010354	0.001	0.001	1
6030498E09Rik	0.739019	-0.0008154	0.002	0.002	1
6230400D17Rik	0.209019	0.0163663	0.062	0.051	1
6330403K07Rik	0.00236913	0.0442586	0.081	0.066	1
6330403L08Rik	0.431642	0.00511627	0.037	0.035	1
6330408M09Rik	0.629262	-0.00259564	0.015	0.017	1
6330409D20Rik	0.191374	-0.00256691	0	0.002	1
6330411D24Rik	0.0337822	0.0304135	0.045	0.032	1
6330415G19Rik	0.926687	0.00115569	0.008	0.007	1
6330418K02Rik	0.417751	-0.00258933	0.031	0.035	1
6330420H09Rik	0.988761	0.000264677	0.002	0.002	1
6330562C20Rik	0.423878	-0.0131946	0.054	0.062	1
6330576A10Rik	0.0912268	0.0322369	0.067	0.054	1
6430503K07Rik	0.41741	0.0083214	0.068	0.065	1
6430548M08Rik	0.777184	-0.00766273	0.118	0.123	1
6430550D23Rik	0.656802	-0.00420195	0.026	0.029	1
6430562O15Rik	0.538865	-0.00162243	0.001	0.002	1
6430571L13Rik	0.844104	-0.00138856	0.004	0.005	1
6430573P05Rik	0.371206	-0.00192701	0.004	0.005	1
Xpnpep3	0.332264	0.0199266	0.159	0.145	1
6530401F13Rik	0.587536	0.00234096	0.016	0.016	1
6530402F18Rik	0.047289	0.0131032	0.027	0.017	1
6530403H02Rik	0.314442	-0.00206079	0	0.001	1
6530409C15Rik	0.757178	0.0112739	0.193	0.185	1
6530411M01Rik	0.378035	0.00622467	0.015	0.011	1
6530413G14Rik	0.307305	-0.00313973	0.001	0.002	1
6530437J22Rik	0.0387943	0.00983031	0.01	0.005	1
6720427I07Rik	0.361065	0.0165579	0.237	0.234	1
6720483E21Rik	0.491814	0.00132933	0.007	0.005	1
6720489N17Rik	0.906133	0.00356763	0.052	0.05	1
6820408C15Rik	0.503478	0.00324142	0.007	0.005	1
7420700N18Rik	0.644129	-0.00108218	0.001	0.001	1
7630403G23Rik	0.586026	-0.0519612	0.115	0.123	1
8030423F21Rik	0.274779	0.00185381	0.002	0	1
8030442B05Rik	0.736294	-0.00418814	0.015	0.017	1
8030443G20Rik	0.721575	-0.00111631	0.001	0.002	1
8030451A03Rik	0.0642634	0.00288839	0.009	0.006	1
8030451O07Rik	0.770714	-0.00690002	0.03	0.034	1
8030453O22Rik	0.163761	0.0046499	0.012	0.01	1
8030455M16Rik	0.611696	-0.00169307	0.006	0.007	1
8030456M14Rik	0.615352	0.00440047	0.014	0.012	1
8030462N17Rik	0.106937	0.0397213	0.328	0.305	1
8430419K02Rik	0.2898	0.00298437	0.005	0.002	1
8430426J06Rik	0.187397	-0.00488506	0.003	0.006	1
8430429K09Rik	0.0634805	0.00232932	0.107	0.114	1
8430430B14Rik	0.274779	0.00185381	0.002	0	1
8430432A02Rik	0.154004	0.00461192	0.008	0.006	1
9030025P20Rik	0.355495	-0.00522217	0.035	0.04	1
9030407P20Rik	0.203634	-0.00338977	0.018	0.018	1
9030612E09Rik	0.639571	0.00171343	0.003	0.002	1
9030624G23Rik	0.604294	0.00204389	0.004	0.003	1
9130008F23Rik	0.650071	-0.00111631	0.001	0.001	1
9130015G15Rik	0.0119408	0.0186948	0.025	0.015	1
9130019O22Rik	0.553565	0.00212001	0.018	0.016	1
9130019P16Rik	0.890228	0.00567655	0.137	0.133	1
9130023H24Rik	0.285789	0.00781342	0.024	0.019	1
9130024F11Rik	0.660449	-0.000447156	0.004	0.004	1
9130213A22Rik	0.895405	-0.000610015	0.001	0.001	1
9130221H12Rik	0.867711	0.00258413	0.017	0.016	1
9130230N09Rik	0.257096	-0.00263414	0.001	0.003	1
9130401M01Rik	0.00311103	0.0419026	0.173	0.141	1
9130604C24Rik	0.664018	-0.00356583	0.01	0.013	1
9230102K24Rik	0.319392	0.00551228	0.009	0.005	1
9230104M06Rik	0.193609	-0.00260054	0.001	0.002	1
9230112E08Rik	0.604294	0.00204389	0.004	0.003	1
9230112J17Rik	0.439703	-0.00212838	0.001	0.002	1
9230114K14Rik	0.296292	-0.0120529	0.089	0.091	1
9230116L04Rik	0.320317	-0.00263414	0.001	0.002	1
9230116N13Rik	0.951251	0.0011046	0.013	0.012	1
9330020H09Rik	0.479242	0.00696351	0.022	0.018	1
9330102E08Rik	0.584628	0.000459089	0.005	0.005	1
9330104G04Rik	0.0200627	-0.0125316	0.028	0.039	1
9330111N05Rik	0.0014134	-0.206978	0.183	0.22	1
9330117O12Rik	0.307379	-0.0320364	0.377	0.396	1
9330118I20Rik	0.998721	-1.10741e-05	0.005	0.005	1
9330121J05Rik	0.11057	0.00410314	0.004	0.001	1
9330136K24Rik	0.457706	-0.00467389	0.02	0.021	1
1110015O18Rik	1.06622e-05	0.0366088	0.035	0.016	0.196163
9330159F19Rik	0.0557795	0.000518011	0.729	0.71	1
9330159M07Rik	0.458473	0.00447451	0.017	0.015	1
9330160F10Rik	0.854623	0.0015523	0.017	0.017	1
9330162012Rik	0.0231939	0.0110897	0.016	0.011	1
9330175M20Rik	0.139532	-0.00115676	0.076	0.083	1
9330179D12Rik	0.659168	0.00112103	0.008	0.007	1
9330182L06Rik	0.00319429	-0.0762034	0.479	0.492	1
9330185C12Rik	0.934774	0.000403113	0.001	0.001	1
9330188P03Rik	0.442927	-0.00361276	0.13	0.127	1
9330198N18Rik	0.366155	0.01005	0.039	0.032	1
9330199G10Rik	0.415054	-0.0351956	0.181	0.193	1
9430002A10Rik	0.295014	-0.00179187	0.002	0.004	1
9430015G10Rik	0.0290218	0.0162704	0.068	0.065	1
9430018G01Rik	0.872027	-0.000575703	0.001	0.001	1
9430021M05Rik	0.0444884	0.00508008	0.004	0.001	1
9430037G07Rik	0.272956	0.00356119	0.004	0.002	1
9430038I01Rik	0.686702	0.0111595	0.092	0.085	1
9430041J12Rik	0.327433	0.0117006	0.026	0.021	1
9430060I03Rik	0.0438534	0.0118052	0.028	0.021	1
9430065F17Rik	0.337375	-0.00348208	0.023	0.024	1
9430069I07Rik	0.960364	0.000368469	0.001	0.001	1
9430091E24Rik	0.112807	0.0166449	0.068	0.056	1
9530018F02Rik	0.202664	-0.00553521	0.01	0.012	1
9530026P05Rik	0.0703536	0.0299717	0.035	0.025	1
9530034E10Rik	0.665912	0.00256081	0.023	0.021	1
9530036O11Rik	0.0738516	0.0135652	0.034	0.025	1
9530046B11Rik	0.974443	0.000333848	0.002	0.001	1
9530051G07Rik	0.00338126	0.0156834	0.015	0.01	1
9530052C20Rik	0.934774	0.000403113	0.001	0.001	1
9530052E02Rik	0.668373	0.000335602	0.029	0.031	1
9530059O14Rik	0.167741	-0.0265499	0.182	0.201	1
9530062K07Rik	0.126809	-0.0161343	0.028	0.038	1
9530068E07Rik	0.0621556	0.0384589	0.263	0.237	1
9530077C05Rik	0.305499	0.0205764	0.13	0.118	1
9530080O11Rik	0.789962	0.00164338	0.003	0.002	1
9530082P21Rik	0.199091	0.0104779	0.032	0.024	1
9530097N15Rik	0.895405	-0.000610015	0.001	0.001	1
9630001P10Rik	0.253877	0.00396522	0.009	0.007	1
9630009A06Rik	0.0787834	-0.0270584	0.099	0.117	1
9630013A20Rik	0.148441	0.101558	0.055	0.045	1
9630013D21Rik	0.0105019	0.00197373	0.005	0.003	1
9630014M24Rik	0.120478	0.0277022	0.05	0.039	1
9630015K15Rik	0.757796	-0.00115042	0.001	0.002	1
9630028H03Rik	0.00340831	-0.000178033	0.049	0.038	1
9630041A04Rik	0.263709	0.00053537	0.014	0.012	1
9830132P13Rik	0.464395	-0.00158848	0.001	0.002	1
9930012K11Rik	0.195865	0.00515167	0.027	0.022	1
9930014A18Rik	0.987605	-0.000344316	0.003	0.004	1
9930021J03Rik	0.0873553	0.0254508	0.557	0.529	1
9930104L06Rik	0.1782	-0.00167447	0.08	0.085	1
9930111J21Rik2	0.315649	0.00475553	0.006	0.004	1
a	0.47998	0.000988381	0.027	0.025	1
A030001D20Rik	0.188916	0.0107003	0.041	0.033	1
A030005L19Rik	0.69194	0.00117245	0.003	0.002	1
A130010J15Rik	0.0980097	0.00732279	0.036	0.029	1
A130014A01Rik	0.153258	0.0161983	0.06	0.049	1
A130051J06Rik	0.386815	0.00185381	0.001	0	1
A230004M16Rik	0.579801	0.00174849	0.003	0.001	1
A230005M16Rik	0.00235744	-0.00354533	0	0.002	1
A230006K03Rik	0.985129	-0.000447156	0.004	0.004	1
A230009B12Rik	0.0018077	-0.110636	0.392	0.422	1
A230020J21Rik	0.908301	-0.000644304	0.001	0.002	1
A230051N06Rik	0.602169	0.000736069	0.002	0.002	1
A230056P14Rik	0.0865851	0.0181881	0.121	0.105	1
A230057D06Rik	0.9496	-0.00316483	0.296	0.296	1
A230059L01Rik	0.313618	-0.00337307	0.003	0.005	1
A230060F14Rik	0.267321	-0.004447	0.004	0.007	1
A230065N10Rik	0.721575	-0.00111631	0.001	0.002	1
A230072C01Rik	0.00819016	0.0235743	0.081	0.063	1
A230072E10Rik	0.415273	-0.00180534	0.026	0.024	1
A230077H06Rik	0.0321205	0.024383	0.043	0.03	1
A230083G16Rik	0.740099	0.00307388	0.013	0.011	1
A230083N12Rik	0.256029	0.00421489	0.007	0.004	1
A230087F16Rik	0.993813	-0.00017245	0.002	0.002	1
A230103J11Rik	0.996311	-0.00010354	0.001	0.001	1
A230107N01Rik	0.183572	0.00633316	0.014	0.011	1
A230108P19Rik	0.872303	0.000805548	0.002	0.001	1
A2m	0.690478	0.000875122	0.001	0.001	1
A2ml1	0.514544	0.00218451	0.003	0.002	1
A330008L17Rik	0.42654	-0.00135461	0.003	0.004	1
A330009N23Rik	0.423525	0.00065239	0.008	0.008	1
A330015K06Rik	0.000345298	-0.108327	0.711	0.739	1
A330023F24Rik	0.271118	0.0199832	0.354	0.336	1
A330032B11Rik	0.788106	-0.00194419	0.051	0.051	1
A330035P11Rik	0.454369	0.000459089	0.005	0.004	1
A330040F15Rik	0.735293	0.00468757	0.012	0.01	1
A330041J22Rik	0.284792	0.00349734	0.009	0.006	1
A330048O09Rik	0.224259	0.00392424	0.006	0.003	1
A330069K06Rik	0.185532	-0.00613718	0.001	0.002	1
A330072L02Rik	0.000514803	-0.0269449	0.019	0.034	1
A330074K22Rik	0.921426	-0.000712812	0.002	0.002	1
A330076H08Rik	0.555671	0.017947	0.243	0.231	1
A330093E20Rik	0.830517	-0.00189326	0.003	0.004	1
A330102I10Rik	0.00873279	0.037309	0.058	0.04	1
A3galt2	0.222587	-0.00296891	0.004	0.005	1
A430005L14Rik	0.000769462	0.0505878	0.206	0.167	1
A430010J10Rik	0.216102	0.00665297	0.012	0.011	1
A430018G15Rik	0.855998	-0.00213161	0.025	0.026	1
A430027H14Rik	0.0413127	0.00764067	0.008	0.004	1
A430033K04Rik	0.0487048	0.0280515	0.123	0.109	1
A430035B10Rik	0.967147	-0.000421917	0.087	0.087	1
A430073D23Rik	0.860039	-0.00164047	0.073	0.075	1
A430078I02Rik	0.872027	-0.000575703	0.001	0.001	1
A430090L17Rik	0.793895	0.00217616	0.011	0.009	1
A430105J06Rik	0.409234	0.00432941	0.015	0.012	1
A430106G13Rik	0.565203	0.00550872	0.017	0.014	1
A430108G06Rik	0.668777	-0.000781227	0.003	0.003	1
A430110L20Rik	0.671451	9.21575e-05	0.004	0.004	1
A4galt	0.00106907	-0.00125262	0.001	0.003	1
A530017D24Rik	0.994386	-0.000734377	0.053	0.053	1
A530041M06Rik	0.0984828	0.0163333	0.051	0.041	1
A530053G22Rik	0.148272	0.00992056	0.022	0.027	1
A530072M11Rik	0.0138938	-0.0115714	0.019	0.028	1
A530083I20Rik	0.139561	0.00592912	0.027	0.021	1
A630001G21Rik	0.0562577	0.00117245	0.003	0.002	1
A630001O12Rik	0.254343	-0.00189506	0.008	0.01	1
A630052C17Rik	0.787952	0.00102231	0.028	0.027	1
A630072M18Rik	0.849233	0.0039212	0.032	0.03	1
A630089N07Rik	0.0359031	0.0326723	0.105	0.085	1
A730011C13Rik	0.487547	-0.00296891	0.004	0.006	1
A730017L22Rik	0.647572	-0.00761115	0.05	0.056	1
A730018C14Rik	0.350772	-0.0015545	0	0.001	1
A730020E08Rik	0.383793	0.00783748	0.038	0.032	1
A730020M07Rik	0.213788	0.00359684	0.003	0.002	1
A730049H05Rik	0.0368331	-0.00790431	0.003	0.005	1
A730056A06Rik	0.781162	-0.00302443	0.016	0.018	1
A730061H03Rik	0.415083	0.00378156	0.007	0.005	1
A730063M14Rik	0.869531	0.00216797	0.02	0.019	1
A730071L15Rik	0.31709	0.00352556	0.005	0.002	1
A730081D07Rik	0.177039	-0.0159444	0.059	0.061	1
A730085K08Rik	0.985129	-0.000412899	0.004	0.004	1
A730090N16Rik	0.0804982	0.00124268	0.012	0.009	1
A730098A19Rik	0.355045	-0.00290214	0.004	0.005	1
A830005F24Rik	0.108424	0.00770277	0.012	0.007	1
A830008E24Rik	0.898973	0.00196737	0.014	0.013	1
A830009L08Rik	0.0393631	-0.00796761	0.004	0.008	1
A830011K09Rik	0.402993	0.00153848	0.004	0.002	1
A830018L16Rik	0.450003	-0.00176049	0.006	0.007	1
A830019P07Rik	0.662554	-0.00259726	0.007	0.008	1
A830021F12Rik	0.0900006	0.00622467	0.014	0.009	1
A830035A12Rik	0.0757829	0.00413899	0.004	0.001	1
A830035O19Rik	0.440857	0.00139896	0.005	0.005	1
A830052D11Rik	0.315721	0.00847882	0.025	0.021	1
A830082K12Rik	0.0400889	0.019249	0.066	0.052	1
A830082N09Rik	0.208372	-0.00490565	0.031	0.031	1
A830092H15Rik	0.0516418	0.00634425	0.007	0.002	1
A930001A20Rik	0.401104	0.00648433	0.008	0.005	1
A930001M01Rik	0.332755	-0.00727171	0.021	0.026	1
A930002C04Rik	0.304021	0.00319728	0.003	0.001	1
A930003A15Rik	0.604719	-0.00934286	0.055	0.06	1
A930003O13Rik	0.848073	-0.000319517	0.007	0.007	1
A930004D18Rik	0.569478	0.00251421	0.005	0.003	1
A930005H10Rik	0.510259	0.0109164	0.139	0.137	1
A930006K02Rik	0.676173	-0.00705434	0.037	0.042	1
A930006L05Rik	0.998393	0.000126615	0.004	0.004	1
A930007I19Rik	0.276455	0.00906891	0.037	0.03	1
A930012L18Rik	0.608048	0.00178357	0.002	0.001	1
A930012O16Rik	0.551764	-0.00243136	0.004	0.005	1
A930015D03Rik	0.0209324	0.0495087	0.269	0.245	1
A930016O22Rik	0.601703	-0.000206869	0.002	0.002	1
A930017K11Rik	0.823886	0.00203687	0.078	0.077	1
A930019D19Rik	0.174493	0.00319728	0.003	0.001	1
A930024E05Rik	0.452767	0.000474581	0.023	0.021	1
A930028N01Rik	0.165126	-0.0107923	0.017	0.024	1
A930029G22Rik	0.164247	-0.00276586	0.007	0.009	1
A930033H14Rik	0.991326	-0.000241266	0.002	0.002	1
A930033M14Rik	0.830274	0.000840323	0.002	0.001	1
A930037H05Rik	0.596852	0.00725659	0.056	0.054	1
A930041C12Rik	0.274779	0.00185381	0.002	0	1
AA386476	0.404946	-0.00878192	0.02	0.025	1
AA387883	0.0123608	0.00536794	0.011	0.006	1
AA388235	0.871279	-0.00404727	0.037	0.039	1
AA467197	0.521825	0.00410774	0.008	0.006	1
AA986860	0.197446	-0.00795887	0.031	0.038	1
Aaas	0.041962	0.0147068	0.064	0.058	1
Aacs	0.0262816	0.027551	0.095	0.075	1
Aadat	0.431508	0.00138195	0.001	0	1
Aagab	0.0087792	0.0394001	0.132	0.109	1
Aak1	0.591145	0.0140259	0.46	0.447	1
Aamdc	0.488036	0.018045	0.495	0.479	1
Aamp	0.0936692	0.0433009	0.564	0.541	1
Aar2	0.91583	-0.000182953	0.121	0.122	1
Aard	0.418641	0.000583446	0.009	0.007	1
Aars	0.344552	-0.0191618	0.229	0.237	1
Aars2	0.0191844	0.019952	0.042	0.028	1
Aarsd1	0.0304758	0.0393524	0.336	0.304	1
Aasdh	0.0193512	0.0292232	0.097	0.076	1
Aasdhppt	0.00582496	-0.00370655	0.246	0.234	1
Aass	0.0267693	0.00594766	0.005	0.001	1
Aatf	0.0280216	0.0293976	0.302	0.273	1
Aatk	0.62178	-0.00360871	0.725	0.736	1
AB124611	0.260066	-0.0037779	0.002	0.005	1
Abat	0.243762	-0.0236369	0.24	0.258	1
Abca16	0.0113703	-0.00303939	0	0.002	1
Abca17	0.442327	0.00413899	0.001	0.001	1
Abca2	0.452756	-0.0217202	0.806	0.818	1
Abca3	0.015365	0.0408704	0.19	0.161	1
Abca4	0.572776	0.00134698	0.002	0.001	1
Abca5	0.593486	0.000868473	0.211	0.207	1
Abca6	0.417743	0.0188129	0.178	0.165	1
Abca7	0.740545	-0.000787232	0.067	0.069	1
Abca8a	0.768507	0.0141009	0.521	0.514	1
Abca8b	0.964084	0.000192388	0.308	0.305	1
Abca9	0.538095	0.00468563	0.01	0.008	1
Abcb10	0.370822	0.0207326	0.211	0.196	1
Abcb1a	0.0173695	-0.000582665	0.016	0.011	1
Abcb1b	0.639753	0.00606917	0.051	0.046	1
Abcb4	0.00187475	0.0502508	0.085	0.062	1
Abcb6	0.718223	0.00318783	0.035	0.032	1
Abcb7	0.244995	0.0341486	0.304	0.285	1
Abcb8	0.498703	-0.00912421	0.195	0.195	1
Abcb9	0.561925	-0.00574383	0.016	0.02	1
Abcc1	0.100636	-0.00546159	0.159	0.17	1
Abcc10	0.535872	0.00980051	0.058	0.052	1
Abcc12	0.697232	0.000840323	0.001	0.001	1
Abcc3	0.281343	0.00399573	0.004	0.002	1
Abcc4	0.364897	0.0117168	0.031	0.025	1
Abcc5	0.0706988	0.0457617	0.622	0.596	1
Abcc6	0.974443	0.000333848	0.002	0.001	1
Abcc8	0.184557	-0.000138006	0.001	0.001	1
Abcc9	0.445104	-0.00645983	0.003	0.004	1
Abcd1	0.418107	0.000530498	0.068	0.07	1
Abcd2	0.779246	0.00193265	0.012	0.011	1
Abcd3	0.167622	0.0360168	0.363	0.34	1
Abcd4	0.136224	0.0193582	0.141	0.134	1
Abce1	0.275654	0.0276851	0.352	0.334	1
Abcf1	0.240117	0.029708	0.497	0.475	1
Abcf2	0.0377791	0.0288019	0.17	0.147	1
Abcf3	0.0322328	0.0302228	0.165	0.141	1
Abcg2	0.0786256	0.0393735	0.153	0.134	1
Abcg4	0.60107	0.00561401	0.021	0.018	1
Abhd10	0.000750598	0.0568719	0.188	0.151	1
Abhd11	0.362352	-0.010197	0.081	0.089	1
Abhd12	0.0833125	0.0474805	0.585	0.568	1
Abhd12b	0.431508	0.00138195	0.001	0	1
Abhd13	0.886031	-0.00520896	0.08	0.083	1
Abhd14a	0.0321391	0.0416023	0.272	0.243	1
Abhd14b	0.60225	0.0094396	0.086	0.079	1
Abhd15	0.645201	-0.00328646	0.02	0.021	1
Abhd16a	0.530303	-0.0202446	0.273	0.284	1
Abhd17a	0.0241514	-0.0233175	0.423	0.418	1
Abhd17b	0.0468619	0.0164081	0.94	0.924	1
Abhd17c	0.568674	-0.00256367	0.11	0.108	1
Abhd18	0.00126196	0.0580976	0.317	0.274	1
Samm50	0.000938159	0.0451051	0.291	0.25	1
Abhd3	0.00279085	0.0518568	0.244	0.207	1
Abhd4	0.0685247	0.0247845	0.313	0.289	1
Abhd5	0.871306	-0.00212793	0.361	0.359	1
Abhd6	0.778079	0.0114583	0.194	0.188	1
Abhd8	0.00489796	0.0183962	0.034	0.021	1
Abi1	0.246094	0.0149154	0.46	0.441	1
Abi2	0.385036	0.0107836	0.419	0.404	1
Abi3	0.0331914	0.00813236	0.013	0.007	1
Abi3bp	0.17605	-0.00438124	0.003	0.005	1
Abitram	0.00236885	0.0156023	0.077	0.072	1
Abl1	0.76584	0.00765095	0.505	0.496	1
Abl2	0.432981	-0.0168414	0.298	0.298	1
Ablim1	0.684455	0.00982004	0.02	0.017	1
Ablim3	0.0836079	0.0160279	0.029	0.02	1
Abra	0.707983	0.000894428	0.006	0.005	1
Abracl	0.225088	0.0120142	0.036	0.028	1
Abraxas1	0.725145	-0.00137709	0.06	0.062	1
Abraxas2	0.00760335	0.0408607	0.195	0.163	1
Abt1	0.829971	0.00724895	0.134	0.128	1
Abtb1	0.579717	0.00953855	0.103	0.097	1
Abtb2	0.00065377	0.0606992	0.455	0.407	1
AC106834.1	0.651323	-0.000644304	0.001	0.001	1
AC109619.1	0.0339642	0.0143674	0.025	0.018	1
AC132307.1	0.345475	-0.0140051	0.065	0.075	1
AC132444.6	0.824137	-0.00128664	0.003	0.004	1
AC135859.1	0.993813	-0.00017245	0.002	0.002	1
AC142100.1	0.119358	-0.00256691	0	0.002	1
AC150683.1	0.549984	-0.00219587	0.002	0.002	1
AC154200.1	0.768113	0.000917107	0.019	0.019	1
AC156546.1	0.508743	0.000901844	0.022	0.023	1
AC159140.1	0.101374	0.00279705	0.002	0	1
AC160336.1	0.537766	0.00600435	0.022	0.019	1
AC163347.1	0.166256	-0.00493114	0.039	0.045	1
AC163638.2	0.441573	0.00432585	0.011	0.008	1
AC163685.1	0.900329	0.00106801	0.004	0.004	1
AC166172.1	0.340103	0.00672552	0.014	0.012	1
AC171003.1	0.989455	0.000562781	0.003	0.003	1
AC241534.1	0.0828833	0.0144699	0.041	0.031	1
Acaa1a	0.950762	0.00168941	0.463	0.463	1
Acaa2	0.0186676	0.0238136	0.046	0.033	1
Acacb	0.531485	0.00251421	0.005	0.003	1
Acad10	0.339633	0.00372538	0.04	0.036	1
Acad11	0.368429	-0.00528272	0.076	0.076	1
Acad12	0.0900715	0.016575	0.042	0.031	1
Acad8	0.678989	-0.000881702	0.153	0.157	1
Acad9	0.366216	0.0152817	0.12	0.108	1
Acadl	0.00374107	0.0653577	0.413	0.373	1
Acadm	0.0128532	0.0561318	0.332	0.299	1
Acads	0.000897377	0.0385455	0.091	0.065	1
Acadsb	0.0615613	0.0406331	0.337	0.309	1
Acadvl	0.0180412	0.0424931	0.229	0.2	1
Acan	0.0356422	0.026958	0.047	0.034	1
Acap2	0.43935	0.00602471	0.851	0.842	1
Acat1	0.0842276	0.0189321	0.418	0.394	1
Acat2	0.0129045	0.0420368	0.183	0.155	1
Acat3	0.761346	0.000672571	0.012	0.012	1
Acbd3	0.032416	0.0389092	0.375	0.342	1
Acbd4	0.00131188	0.0273297	0.048	0.031	1
Acbd5	0.0488869	-0.0191912	0.604	0.592	1
Acbd6	0.680391	-0.0132659	0.44	0.441	1
Acbd7	0.396012	0.00269081	0.002	0.001	1
Accs	0.17194	0.0073064	0.028	0.022	1
Acd	0.0750454	0.0215835	0.074	0.059	1
Ace	0.77773	0.00124219	0.003	0.002	1
Ace2	0.397572	0.000597391	0.003	0.002	1
Acer2	0.844538	-0.00439792	0.048	0.05	1
Acer3	0.0598991	0.0522986	0.221	0.2	1
Ache	0.115866	0.0148556	0.032	0.023	1
Acin1	0.000392894	0.0550905	0.644	0.594	1
Ackr1	0.796325	0.000183602	0.007	0.007	1
Ackr3	0.00172274	0.050157	0.072	0.051	1
Ackr4	0.7981	-0.00212969	0.01	0.012	1
Acly	0.610996	0.0112378	0.292	0.282	1
Acmsd	0.644129	-0.00108218	0.001	0.001	1
Aco1	0.776562	0.00325622	0.207	0.203	1
Aco2	0.424363	-0.0240513	0.54	0.549	1
Acot1	0.208359	0.0200408	0.234	0.216	1
Acot11	0.858965	-0.00379904	0.028	0.031	1
Acot12	0.10796	0.0172197	0.039	0.03	1
Acot13	0.806713	0.0108314	0.306	0.302	1
Acot2	0.473607	0.00502382	0.155	0.156	1
Acot3	0.572776	0.00134698	0.002	0.001	1
Acot4	0.763581	0.000875122	0.001	0.001	1
Acot6	0.229056	-0.0172844	0.065	0.076	1
Acot7	0.291581	-0.020684	0.592	0.589	1
Acot8	0.175514	0.0214275	0.124	0.109	1
Acot9	0.365952	-0.0123999	0.126	0.13	1
Acox1	0.00334689	0.0412515	0.424	0.382	1
Acox2	0.247122	0.00279705	0.002	0	1
Acox3	0.815349	0.00709277	0.078	0.073	1
Acoxl	0.350772	-0.0015545	0	0.001	1
Acp1	0.866627	0.00649788	0.515	0.508	1
Acp2	0.143979	0.0293155	0.178	0.161	1
Acp6	0.089163	0.0231471	0.092	0.078	1
Acpp	0.996311	-0.00010354	0.001	0.001	1
Acr	0.353641	0.00117245	0.003	0.002	1
Acrbp	0.442599	0.00518524	0.051	0.046	1
Acsbg1	0.0182802	0.0111734	0.045	0.034	1
Acsf2	0.40615	0.00332049	0.011	0.009	1
Acsf3	0.157416	0.0110099	0.031	0.023	1
Acsl1	0.178163	-0.0319654	0.41	0.415	1
Acsl4	0.386696	0.00341536	0.182	0.185	1
Acsl5	0.127572	0.0138307	0.028	0.021	1
Acsl6	0.0366351	0.0249891	0.076	0.059	1
Acsm3	0.474009	0.00113908	0.012	0.011	1
Acss1	0.00179296	0.058853	0.124	0.096	1
Acss2	0.126243	0.0387662	0.252	0.229	1
Acss2os	0.0720224	-0.00759225	0.005	0.01	1
Acss3	0.314442	-0.00206079	0	0.001	1
Acta1	0.800413	-0.00121858	0.002	0.003	1
Acta2	0.104049	0.012719	0.023	0.015	1
Actl6a	0.747081	0.00121508	0.264	0.265	1
Actl6b	0.289508	0.000590077	0.018	0.017	1
Actn1	0.352147	-0.0137699	0.08	0.084	1
Actn2	0.636616	0.000368469	0.001	0.001	1
Actn3	0.575424	-0.00017245	0.002	0.001	1
Actn4	0.309194	-0.0349944	0.525	0.535	1
Actr10	0.571904	0.00200689	0.458	0.448	1
Actr1a	0.599555	0.00595502	0.486	0.475	1
Actr1b	0.934915	-0.00141487	0.17	0.17	1
Actr2	0.317237	0.0278247	0.479	0.461	1
Actr3	0.254337	0.0281913	0.501	0.491	1
Actr3b	0.58686	-0.000734377	0.052	0.051	1
Actr5	0.80285	0.00400051	0.069	0.066	1
Actr6	0.0443575	0.0343378	0.251	0.224	1
Actr8	0.0522735	0.0137092	0.232	0.213	1
Acvr1	0.224286	0.0049285	0.252	0.259	1
Acvr1b	0.838632	0.00135982	0.064	0.065	1
Acvr1c	0.349141	-0.00125755	0.007	0.006	1
Acvr2a	0.00186287	0.0499148	0.184	0.172	1
Acvr2b	0.128454	0.0280726	0.155	0.138	1
Acvrl1	0.319894	0.00374595	0.007	0.004	1
Acy1	0.910629	-0.00247654	0.1	0.1	1
Acy3	0.514402	-0.00668375	0.021	0.025	1
Acyp1	0.593901	-0.0022903	0.203	0.209	1
Acyp2	0.0195804	-0.053299	0.663	0.665	1
Ada	0.70378	0.00252678	0.073	0.073	1
Adal	0.384625	0.0166897	0.105	0.096	1
Adam10	0.000390284	-0.0378544	0.673	0.656	1
Adam11	0.148083	0.0130701	0.033	0.025	1
Adam12	0.000428507	0.130115	0.171	0.138	1
Adam15	0.57885	-0.0133742	0.198	0.204	1
Adam17	0.0769496	0.0235416	0.276	0.254	1
Adam18	0.506977	-0.0137521	0.046	0.052	1
Adam19	0.817331	0.0133446	0.22	0.215	1
Adam1a	0.93137	0.00120893	0.021	0.02	1
Adam2	0.990779	0.000385707	0.014	0.013	1
Adam21	0.456299	0.00157343	0.004	0.002	1
Adam22	0.0241265	0.0445491	0.623	0.588	1
Adam23	0.610339	0.0178986	0.193	0.183	1
Adam28	0.908301	-0.000644304	0.001	0.002	1
Adam3	0.573338	0.00218451	0.003	0.002	1
Adam32	0.989767	-0.00238689	0.066	0.066	1
Adam34	0.991339	-0.000652214	0.004	0.004	1
Adam4	0.686522	0.00162432	0.008	0.007	1
Adam5	0.842785	0.00117245	0.003	0.002	1
Adam8	0.916232	-0.00067857	0.002	0.002	1
Adam9	0.225155	0.0227839	0.38	0.359	1
Adamts1	0.809521	-0.00562197	0.203	0.205	1
Adamts10	0.254467	0.0131479	0.032	0.025	1
Adamts12	0.0157502	0.0142616	0.006	0.003	1
Adamts14	0.659148	0.000299251	0.002	0.002	1
Adamts16	0.0400558	0.0048635	0.005	0.002	1
Adamts17	0.929813	-0.00236225	0.017	0.019	1
Adamts18	0.53535	-0.00158848	0.001	0.001	1
Adamts19	0.921221	-1.10741e-05	0.004	0.004	1
Adamts2	0.151199	-0.0359715	0.177	0.188	1
Adamts20	0.0736353	-0.0417345	0.193	0.215	1
Adamts3	0.00262407	0.0391996	0.045	0.029	1
Adamts4	0.745273	0.0126227	0.465	0.455	1
Adamts5	0.300066	0.0103436	0.03	0.024	1
Adamts6	0.997438	0.00268924	0.27	0.269	1
Adamts7	0.115158	0.00218451	0.003	0.001	1
Adamts8	0.908301	-0.000644304	0.001	0.002	1
Adamts9	0.00745047	0.0236513	0.042	0.028	1
Adamtsl1	0.000754114	-0.101664	0.73	0.76	1
Adamtsl2	0.615493	0.00134698	0.001	0.001	1
Adamtsl3	0.84273	-0.00790643	0.061	0.063	1
Adamtsl4	0.0262522	-0.0459552	0.231	0.261	1
Adamtsl5	0.313441	0.00214932	0.001	0.002	1
Adap1	0.0450165	-0.0569903	0.51	0.537	1
Adap2	0.0321051	0.0148362	0.013	0.007	1
Adap2os	0.0159363	0.0164336	0.009	0.004	1
Adar	0.826386	-0.00626139	0.105	0.11	1
Adarb1	0.0164139	0.0261859	0.053	0.038	1
Adat1	0.682258	-0.00238157	0.12	0.118	1
Adat2	0.547547	0.0011447	0.047	0.048	1
Adck1	0.625085	-0.0134389	0.155	0.159	1
Adck2	0.392882	0.0137509	0.078	0.07	1
Adck5	0.209145	0.0115513	0.034	0.027	1
Adcy1	0.693474	0.00645395	0.027	0.024	1
Adcy10	0.360334	-0.0126075	0.05	0.059	1
Adcy2	0.000479215	0.0668382	0.079	0.056	1
Adcy3	0.0209455	0.0294874	0.062	0.046	1
Adcy4	0.528443	-0.00212838	0.001	0.002	1
Adcy5	0.0742309	-0.0309091	0.416	0.421	1
Adcy6	0.874547	0.00308465	0.035	0.033	1
Adcy7	0.817722	0.00113761	0.003	0.002	1
Adcy8	0.000385033	0.0708404	0.066	0.043	1
Adcy9	0.00477509	0.0631523	0.289	0.265	1
Adcyap1	0.763581	0.000875122	0.001	0.001	1
Add1	0.423935	-0.0101432	0.882	0.877	1
Add2	0.000870129	0.0384417	0.053	0.036	1
Add3	0.147747	-0.0405704	0.841	0.858	1
Adgb	0.0874294	0.011896	0.01	0.006	1
Adgra1	0.177734	0.0187072	0.054	0.044	1
Adgra2	0.620691	0.00515183	0.02	0.017	1
Adgra3	0.00502678	0.0393849	0.106	0.088	1
Adgrb1	0.0254993	0.0404476	0.167	0.148	1
Adgrb2	0.127601	0.010168	0.113	0.101	1
Adgrb3	0.00424172	0.187438	0.315	0.299	1
Adgre1	0.000476022	0.0104106	0.01	0.003	1
Adgre5	0.743872	0.00324991	0.01	0.009	1
Adgrf2	0.0783867	-0.00202927	0.008	0.011	1
Adgrf4	0.487291	-0.00155796	0.005	0.006	1
Adgrf5	0.78165	-0.00409041	0.011	0.012	1
Adgrg1	0.0383304	0.0389378	0.116	0.099	1
Adgrg2	0.837082	-0.0029637	0.085	0.085	1
Adgrg3	0.825144	-0.00118451	0.001	0.002	1
Adgrg6	0.100933	-0.0127303	0.007	0.013	1
Adgrl1	0.0233964	0.0388515	0.107	0.088	1
Adgrl2	0.829896	0.00238579	0.009	0.008	1
Adgrl4	0.560377	-0.0116901	0.014	0.013	1
Adgrv1	0.0251339	-0.0574988	0.355	0.374	1
Adh5	0.0939732	-0.03439	0.561	0.566	1
Adhfe1	0.0844577	0.00214674	0.026	0.022	1
Adi1	0.787472	0.011158	0.474	0.465	1
Adig	0.0113703	-0.00253327	0	0.002	1
Adipor1	0.82665	-0.00686425	0.446	0.453	1
Adk	0.0142676	-0.0299215	0.54	0.528	1
Adm	0.000183978	0.0380842	0.059	0.038	1
Adnp	0.195374	0.0253055	0.45	0.427	1
Adnp2	0.838564	-0.00756287	0.107	0.111	1
Atp1a3	0.058181	0.0292039	0.095	0.078	1
Adora1	0.0921987	0.0400591	0.422	0.394	1
Adora2a	0.208225	-0.00206079	0	0.002	1
Adora2b	0.000140211	0.0344901	0.039	0.02	1
Adora3	0.23215	0.00316174	0.004	0.001	1
Adpgk	0.915523	0.000908111	0.082	0.08	1
Adprh	0.233092	0.0256399	0.355	0.345	1
Adprhl1	0.983094	0.000299251	0.002	0.002	1
Adprhl2	0.446644	0.0157856	0.173	0.161	1
Adprm	0.292853	0.0173314	0.102	0.091	1
Adra1a	9.72971e-05	0.0491799	0.073	0.047	1
Adra1b	0.25107	0.00655079	0.013	0.008	1
Adra2c	0.365504	0.00225496	0.003	0.001	1
Adrb1	0.164229	0.00590763	0.01	0.007	1
Adrb2	0.0164603	0.00807195	0.009	0.004	1
Adrm1	0.748049	0.00941854	0.266	0.263	1
Adsl	0.245785	0.0188405	0.117	0.103	1
Adss	0.738676	-0.0101083	0.236	0.239	1
Adssl1	0.0577886	-0.059084	0.504	0.53	1
Ift140	0.13921	0.0238834	0.114	0.098	1
Aebp2	0.375396	0.00987046	0.506	0.491	1
Aen	0.671947	0.00975613	0.075	0.069	1
Afap1	0.0201444	-0.0188052	0.325	0.32	1
Afap1l1	0.694808	0.0031268	0.298	0.301	1
Afdn	0.939337	0.00639813	0.467	0.463	1
Aff1	0.0189701	-0.0473246	0.265	0.272	1
Aff2	0.0701439	0.0324655	0.244	0.22	1
Aff3	0.969833	0.00536751	0.092	0.09	1
Aff4	0.161827	-0.0201044	0.625	0.62	1
Afg1l	0.041603	0.0494252	0.182	0.16	1
Afg3l1	0.00249028	0.0275595	0.304	0.27	1
Afg3l2	0.204682	0.023768	0.164	0.147	1
Afm	0.974443	0.000333848	0.002	0.001	1
Afmid	0.536242	0.00737854	0.026	0.022	1
Aftph	0.470687	0.0194008	0.41	0.396	1
Aga	0.167698	0.0176421	0.171	0.166	1
Agap1	0.0370247	-0.0425646	0.954	0.954	1
Agap2	0.651153	0.00751644	0.039	0.035	1
[truncated: 16,399 more rows]
