# Supplementary material for: Decoding the Effects of Bexarotene treatment on brain of AD-like model mice: Single-Cell Transcriptomics and Chromatin Accessibility Analysis
Source: Research Square preprint supplement (doi:10.21203/rs.3.rs-7201032/v1), 2025-08-13
Supplement: Supplementary file 2 [file 6c4fa383a2eb2587be29be84.xlsx]

## Sheet: DA_Astrocytes
gene_name	query_region	p_val	avg_log2FC	pct.1	pct.2	p_val_adj	tx_id	gene_id	gene_biotype	type	closest_region	distance
Tprg	chr16-25465509-25466009	7.09659e-43	-0.464203	0.356	0.464	2.66278e-37	ENSMUST00000056087	ENSMUSG00000048399	protein_coding	utr	chr16-25422316-25422344	43164
Sdk2	chr11-113806311-113806811	9.53253e-41	-0.676708	0.184	0.281	3.5768e-35	ENSMUST00000041627	ENSMUSG00000041592	protein_coding	cds	chr11-113806267-113806404	0
Firre	chrX-50619887-50620387	5.40726e-29	-1.41458	0.028	0.071	2.02891e-23	ENSMUST00000143999	ENSMUSG00000085396	processed_transcript	gap	chrX-50615516-50626436	0
2010003K11Rik	chr19-4492750-4493250	8.7245e-29	-0.73664	0.115	0.185	3.27361e-23	ENSMUST00000048482	ENSMUSG00000042041	protein_coding	utr	chr19-4496790-4497515	3539
Firre	chrX-50605462-50605962	4.09052e-27	-1.63894	0.019	0.054	1.53485e-21	ENSMUST00000124842	ENSMUSG00000085396	processed_transcript	gap	chrX-50564968-50615360	0
Firre	chrX-50572083-50572583	8.1119e-27	-1.57565	0.021	0.057	3.04375e-21	ENSMUST00000124842	ENSMUSG00000085396	processed_transcript	gap	chrX-50564968-50615360	0
Gm5083	chr13-44222388-44222888	2.55258e-26	-0.586881	0.16	0.234	9.57778e-21	ENSMUST00000163056	ENSMUSG00000089815	lincRNA	exon	chr13-44124654-44125179	97208
A130057D12Rik	chr9-75435878-75436378	4.07372e-26	-0.649548	0.129	0.199	1.52854e-20	ENSMUST00000181896	ENSMUSG00000097298	protein_coding	cds	chr9-75441122-75441652	4743
Ntsr2	chr12-16657268-16657768	4.65892e-26	-0.622939	0.159	0.225	1.74812e-20	ENSMUST00000111064	ENSMUSG00000020591	protein_coding	gap	chr12-16656871-16658364	0
Firre	chrX-50572637-50573137	8.61047e-26	-1.5806	0.019	0.055	3.23082e-20	ENSMUST00000124842	ENSMUSG00000085396	processed_transcript	gap	chrX-50564968-50615360	0
Firre	chrX-50614842-50615342	2.48513e-25	-1.40281	0.025	0.063	9.32471e-20	ENSMUST00000124842	ENSMUSG00000085396	processed_transcript	gap	chrX-50564968-50615360	0
Firre	chrX-50612136-50612636	2.55108e-25	-1.30072	0.029	0.073	9.57218e-20	ENSMUST00000124842	ENSMUSG00000085396	processed_transcript	gap	chrX-50564968-50615360	0
Firre	chrX-50599692-50600192	1.31438e-24	-1.59231	0.018	0.051	4.9318e-19	ENSMUST00000124842	ENSMUSG00000085396	processed_transcript	gap	chrX-50564968-50615360	0
Firre	chrX-50600197-50600697	4.04749e-24	-1.39299	0.024	0.061	1.5187e-18	ENSMUST00000124842	ENSMUSG00000085396	processed_transcript	gap	chrX-50564968-50615360	0
Pts	chr9-50522455-50522955	4.50873e-24	-0.597338	0.141	0.207	1.69177e-18	ENSMUST00000034570	ENSMUSG00000032067	protein_coding	cds	chr9-50522529-50522599	0
Firre	chrX-50623091-50623591	2.58773e-23	-1.45419	0.021	0.057	9.70969e-18	ENSMUST00000148530	ENSMUSG00000085396	processed_transcript	gap	chrX-50620805-50626436	0
Thrb	chr14-17632845-17633345	7.38204e-23	-0.601799	0.136	0.2	2.76989e-17	ENSMUST00000022303	ENSMUSG00000021779	protein_coding	exon	chr14-17660960-17661024	27614
Firre	chrX-50602832-50603332	8.76406e-23	-1.34426	0.025	0.06	3.28845e-17	ENSMUST00000124842	ENSMUSG00000085396	processed_transcript	gap	chrX-50564968-50615360	0
Firre	chrX-50611627-50612127	3.21679e-22	-1.37059	0.024	0.057	1.207e-16	ENSMUST00000124842	ENSMUSG00000085396	processed_transcript	gap	chrX-50564968-50615360	0
Nova1	chr12-46197512-46198012	4.32547e-22	1.4958	0.05	0.018	1.623e-16	ENSMUST00000021438	ENSMUSG00000021047	protein_coding	utr	chr12-46694517-46699968	496504
Gm13794	chr2-95210525-95211025	2.34627e-21	-1.28266	0.026	0.06	8.80366e-16	ENSMUST00000148637	ENSMUSG00000084906	lincRNA	exon	chr2-95394242-95394308	183216
Ky	chr9-102499210-102499710	1.70577e-20	-0.562433	0.138	0.201	6.40039e-15	ENSMUST00000039390	ENSMUSG00000035606	protein_coding	exon	chr9-102505750-102506278	6039
2410080I02Rik	chr19-23134712-23135212	2.73978e-20	-0.521832	0.163	0.221	1.02802e-14	ENSMUST00000142712	ENSMUSG00000044387	lincRNA	gap	chr19-23134955-23135358	0
4933407K13Rik	chrX-75758988-75759488	3.69203e-20	-1.34225	0.022	0.053	1.38532e-14	ENSMUST00000138943	ENSMUSG00000087396	processed_transcript	gap	chrX-75755529-75760231	0
Kcmf1	chr6-72873260-72873760	4.14779e-20	-0.621188	0.11	0.163	1.55633e-14	ENSMUST00000068697	ENSMUSG00000055239	protein_coding	gap	chr6-72861926-72899613	0
Notch2	chr3-98050445-98050945	7.16816e-19	-0.930524	0.051	0.087	2.68964e-13	ENSMUST00000079812	ENSMUSG00000027878	protein_coding	gap	chr3-98047810-98070859	0
Firre	chrX-50583659-50584159	1.71574e-18	-1.56922	0.013	0.038	6.4378e-13	ENSMUST00000124842	ENSMUSG00000085396	processed_transcript	gap	chrX-50564968-50615360	0
Firre	chrX-50566317-50566817	4.23214e-18	-1.3031	0.02	0.05	1.58798e-12	ENSMUST00000124842	ENSMUSG00000085396	processed_transcript	gap	chrX-50564968-50615360	0
Plcb1	chr2-134976650-134977150	6.50834e-18	-0.558795	0.13	0.185	2.44206e-12	ENSMUST00000130524	ENSMUSG00000051177	protein_coding	gap	chr2-134813679-134988123	0
Firre	chrX-50560862-50561362	8.37645e-18	-1.04839	0.033	0.069	3.14301e-12	ENSMUST00000124842	ENSMUSG00000085396	processed_transcript	gap	chrX-50558385-50564812	0
Firre	chrX-50591403-50591903	1.89616e-17	-1.34542	0.018	0.046	7.11477e-12	ENSMUST00000124842	ENSMUSG00000085396	processed_transcript	gap	chrX-50564968-50615360	0
Vash1	chr12-86644836-86645336	4.56943e-17	-0.426872	0.192	0.252	1.71454e-11	ENSMUST00000021681	ENSMUSG00000021256	protein_coding	exon	chr12-86678700-86680326	33363
Firre	chrX-50580133-50580633	5.63366e-17	-1.4229	0.016	0.04	2.11386e-11	ENSMUST00000124842	ENSMUSG00000085396	processed_transcript	gap	chrX-50564968-50615360	0
Ky	chr9-102496287-102496787	9.31636e-17	-0.759118	0.064	0.103	3.49568e-11	ENSMUST00000039390	ENSMUSG00000035606	protein_coding	exon	chr9-102505750-102506278	8962
Firre	chrX-50614290-50614790	1.47046e-16	-1.47417	0.015	0.038	5.51748e-11	ENSMUST00000124842	ENSMUSG00000085396	processed_transcript	gap	chrX-50564968-50615360	0
Dio3os	chr12-110187974-110188474	1.52417e-16	-1.17033	0.026	0.054	5.719e-11	ENSMUST00000181693	ENSMUSG00000097758	lincRNA	exon	chr12-110275384-110275578	86909
Hr	chr14-70551928-70552428	1.58685e-16	-0.8317	0.051	0.087	5.95416e-11	ENSMUST00000161468	ENSMUSG00000022096	protein_coding	gap	chr14-70552325-70552839	0
Dab2	chr15-5877680-5878180	1.64585e-16	-0.894116	0.045	0.08	6.17555e-11	ENSMUST00000078019	ENSMUSG00000022150	protein_coding	exon	chr15-6299788-6299899	421607
Firre	chrX-50590646-50591146	1.99121e-16	-1.23215	0.021	0.05	7.47142e-11	ENSMUST00000124842	ENSMUSG00000085396	processed_transcript	gap	chrX-50564968-50615360	0
Atp5o	chr16-91837254-91837754	4.55774e-16	-0.330505	0.289	0.35	1.71015e-10	ENSMUST00000159295	ENSMUSG00000022956	protein_coding	gap	chr16-91686371-91926458	0
Cybrd1	chr2-71162679-71163179	5.99938e-16	-0.462766	0.166	0.216	2.25109e-10	ENSMUST00000028403	ENSMUSG00000027015	protein_coding	utr	chr2-71138658-71142926	19752
Aqp6	chr15-99599270-99599770	6.54411e-16	-0.608997	0.092	0.14	2.45548e-10	ENSMUST00000023754	ENSMUSG00000043144	protein_coding	exon	chr15-99601400-99601800	1629
Kdm6a	chrX-18162179-18162679	7.35911e-16	-0.276474	0.362	0.415	2.76129e-10	ENSMUST00000052368	ENSMUSG00000037369	protein_coding	utr	chrX-18162575-18163005	0
4933407K13Rik	chrX-75733595-75734095	8.46035e-16	-1.38862	0.016	0.039	3.17449e-10	ENSMUST00000140409	ENSMUSG00000087396	processed_transcript	gap	chrX-75731183-75736092	0
4933407K13Rik	chrX-75734563-75735063	1.07448e-15	-1.87459	0.007	0.024	4.03168e-10	ENSMUST00000140409	ENSMUSG00000087396	processed_transcript	gap	chrX-75731183-75736092	0
2410080I02Rik	chr19-23133382-23133882	1.30815e-15	-0.459184	0.161	0.217	4.90843e-10	ENSMUST00000142712	ENSMUSG00000044387	lincRNA	exon	chr19-23134900-23134954	1017
Capn2	chr1-182474935-182475435	1.48951e-15	-0.360446	0.237	0.293	5.58895e-10	ENSMUST00000194961	ENSMUSG00000026509	protein_coding	gap	chr1-182473947-182477250	0
Hs1bp3	chr12-8365283-8365783	2.4146e-15	-0.594483	0.099	0.141	9.06006e-10	ENSMUST00000020927	ENSMUSG00000020605	protein_coding	utr	chr12-8342088-8343824	21458
Oscp1	chr4-126062696-126063196	2.63126e-15	-0.35291	0.256	0.308	9.87303e-10	ENSMUST00000035497	ENSMUSG00000042616	protein_coding	gap	chr4-126058793-126073804	0
Gli2	chr1-118909010-118909510	4.3505e-15	-0.468428	0.151	0.198	1.63239e-09	ENSMUST00000162607	ENSMUSG00000048402	protein_coding	gap	chr1-118866758-119053301	0
Pepd	chr7-35042735-35043235	5.39171e-15	-0.357713	0.233	0.285	2.02308e-09	ENSMUST00000160320	ENSMUSG00000063931	protein_coding	gap	chr7-35040856-35043689	0
Fggy	chr4-95557202-95557702	6.67965e-15	0.384852	0.273	0.214	2.50634e-09	ENSMUST00000177394	ENSMUSG00000028573	protein_coding	utr	chr4-95557520-95557591	0
Firre	chrX-50597036-50597536	1.26827e-14	-1.20074	0.02	0.045	4.75881e-09	ENSMUST00000124842	ENSMUSG00000085396	processed_transcript	gap	chrX-50564968-50615360	0
B430203G13Rik	chr12-17881554-17882054	1.43115e-14	-0.60168	0.089	0.13	5.36996e-09	ENSMUST00000169657	ENSMUSG00000067356	protein_coding	exon	chr12-17924294-17925668	42239
Bcl2l1	chr2-152785462-152785962	2.59542e-14	-0.240573	0.392	0.446	9.73853e-09	ENSMUST00000173755	ENSMUSG00000007659	protein_coding	gap	chr2-152782283-152828446	0
Dzip1l	chr9-99630684-99631184	2.65303e-14	-0.321559	0.264	0.317	9.95468e-09	ENSMUST00000131095	ENSMUSG00000037784	protein_coding	gap	chr9-99629670-99632636	0
4933407K13Rik	chrX-75757991-75758491	2.67928e-14	-1.47767	0.012	0.032	1.00532e-08	ENSMUST00000138943	ENSMUSG00000087396	processed_transcript	gap	chrX-75755529-75760231	0
Bcar3	chr3-122413638-122414138	2.91965e-14	-0.327644	0.253	0.307	1.09551e-08	ENSMUST00000029766	ENSMUSG00000028121	protein_coding	exon	chr3-122419780-122420183	5641
Agpat3	chr10-78261191-78261691	3.42387e-14	-0.542145	0.108	0.15	1.2847e-08	ENSMUST00000001240	ENSMUSG00000001211	protein_coding	utr	chr10-78269178-78273686	7486
Lyrm4	chr13-35995663-35996163	3.66078e-14	-0.485684	0.134	0.182	1.3736e-08	ENSMUST00000053265	ENSMUSG00000046573	protein_coding	gap	chr13-35979908-36092805	0
Gm26704	chr15-38710798-38711298	4.42273e-14	-0.211313	0.471	0.52	1.6595e-08	ENSMUST00000181362	ENSMUSG00000097875	lincRNA	exon	chr15-38726869-38726901	15570
Firre	chrX-50594931-50595431	6.43753e-14	-1.4026	0.012	0.033	2.41549e-08	ENSMUST00000124842	ENSMUSG00000085396	processed_transcript	gap	chrX-50564968-50615360	0
Gm26551	chr11-51916548-51917048	7.51461e-14	1.0429	0.054	0.027	2.81963e-08	ENSMUST00000181262	ENSMUSG00000097219	lincRNA	exon	chr11-51949882-51949916	32833
4933407K13Rik	chrX-75749274-75749774	7.57029e-14	-1.60286	0.009	0.026	2.84052e-08	ENSMUST00000140409	ENSMUSG00000087396	processed_transcript	gap	chrX-75741979-75751524	0
Firre	chrX-50607595-50608095	1.94413e-13	-1.32511	0.014	0.035	7.29476e-08	ENSMUST00000124842	ENSMUSG00000085396	processed_transcript	gap	chrX-50564968-50615360	0
Map4k3	chr17-80661768-80662268	2.0084e-13	-0.405045	0.171	0.223	7.5359e-08	ENSMUST00000112389	ENSMUSG00000024242	protein_coding	gap	chr17-80655922-80663991	0
Mink1	chr11-70573739-70574239	2.44949e-13	-0.338684	0.228	0.278	9.19098e-08	ENSMUST00000102559	ENSMUSG00000020827	protein_coding	gap	chr11-70563127-70597167	0
Tecta	chr9-42381970-42382470	2.50615e-13	-0.342924	0.226	0.281	9.40356e-08	ENSMUST00000160940	ENSMUSG00000037705	protein_coding	gap	chr9-42378065-42383994	0
Spop	chr11-95414539-95415039	2.69532e-13	-0.314721	0.253	0.303	1.01134e-07	ENSMUST00000150884	ENSMUSG00000057522	protein_coding	gap	chr11-95414405-95470521	0
4933407K13Rik	chrX-75744391-75744891	3.05966e-13	-1.58942	0.008	0.024	1.14804e-07	ENSMUST00000140409	ENSMUSG00000087396	processed_transcript	gap	chrX-75741979-75751524	0
Elmo2	chr2-165321426-165321926	4.25546e-13	-0.524887	0.11	0.151	1.59673e-07	ENSMUST00000128690	ENSMUSG00000017670	protein_coding	gap	chr2-165316352-165325866	0
Prkdc	chr16-15723730-15724230	4.94195e-13	0.319065	0.325	0.267	1.85432e-07	ENSMUST00000023352	ENSMUSG00000022672	protein_coding	gap	chr16-15719513-15725332	0
Cpvl	chr6-53973447-53973947	5.21807e-13	-0.683695	0.061	0.094	1.95793e-07	ENSMUST00000166545	ENSMUSG00000052955	protein_coding	gap	chr6-53967875-53974621	0
Prrg2	chr7-45054074-45054574	5.24642e-13	0.46812	0.179	0.134	1.96856e-07	ENSMUST00000133587	ENSMUSG00000007837	protein_coding	cds	chr7-45054573-45054647	0
Nphp1	chr2-127757090-127757590	5.75498e-13	-0.322431	0.244	0.298	2.15938e-07	ENSMUST00000110357	ENSMUSG00000027378	protein_coding	gap	chr2-127756169-127757678	0
Firre	chrX-50604948-50605448	6.10599e-13	-1.25889	0.015	0.037	2.29109e-07	ENSMUST00000124842	ENSMUSG00000085396	processed_transcript	gap	chrX-50564968-50615360	0
Myo1e	chr9-70381987-70382487	6.80147e-13	-0.556169	0.089	0.131	2.55205e-07	ENSMUST00000034745	ENSMUSG00000032220	protein_coding	gap	chr9-70378811-70383803	0
Ercc6l2	chr13-63899003-63899503	8.29626e-13	-0.566579	0.09	0.128	3.11292e-07	ENSMUST00000162086	ENSMUSG00000021470	protein_coding	cds	chr13-63898534-63899503	0
5031439G07Rik	chr15-84973336-84973836	9.04668e-13	-0.375677	0.188	0.232	3.39449e-07	ENSMUST00000170863	ENSMUSG00000036046	protein_coding	gap	chr15-84960622-84988509	0
Nrarp	chr2-25182534-25183034	1.01276e-12	-0.291442	0.274	0.326	3.80007e-07	ENSMUST00000104999	ENSMUSG00000078202	protein_coding	utr	chr2-25181456-25183339	0
Trim67	chr8-124826675-124827175	1.10964e-12	-0.595106	0.078	0.116	4.16359e-07	ENSMUST00000167588	ENSMUSG00000036913	protein_coding	gap	chr8-124826239-124828098	0
Clmn	chr12-104829913-104830413	1.55449e-12	-0.47524	0.125	0.172	5.83277e-07	ENSMUST00000109937	ENSMUSG00000021097	protein_coding	gap	chr12-104804671-104864869	0
2410080I02Rik	chr19-23135860-23136360	1.84202e-12	-0.257065	0.323	0.376	6.91161e-07	ENSMUST00000142712	ENSMUSG00000044387	lincRNA	exon	chr19-23135359-23135717	142
Trp53	chr11-69592285-69592785	1.9958e-12	-0.228927	0.383	0.433	7.48865e-07	ENSMUST00000108657	ENSMUSG00000059552	protein_coding	utr	chr11-69591309-69591873	411
Firre	chrX-50576797-50577297	2.02062e-12	-1.12837	0.019	0.041	7.58178e-07	ENSMUST00000124842	ENSMUSG00000085396	processed_transcript	gap	chrX-50564968-50615360	0
Chst8	chr7-34734330-34734830	2.51836e-12	-0.611291	0.072	0.107	9.44939e-07	ENSMUST00000154629	ENSMUSG00000060402	protein_coding	gap	chr7-34676673-34748061	0
Tcf4	chr18-69585358-69585858	2.7023e-12	-0.452683	0.137	0.176	1.01396e-06	ENSMUST00000136151	ENSMUSG00000053477	protein_coding	gap	chr18-69564687-69633576	0
Lrig1	chr6-94755923-94756423	2.81735e-12	0.476774	0.167	0.123	1.05712e-06	ENSMUST00000032105	ENSMUSG00000030029	protein_coding	exon	chr6-94699462-94700158	55764
Lyrm4	chr13-35980437-35980937	2.97554e-12	-0.227521	0.386	0.444	1.11648e-06	ENSMUST00000053265	ENSMUSG00000046573	protein_coding	gap	chr13-35979908-36092805	0
Rrp8	chr7-105736336-105736836	3.85408e-12	-0.240593	0.346	0.389	1.44613e-06	ENSMUST00000033179	ENSMUSG00000030888	protein_coding	cds	chr7-105736298-105736396	0
Wasf3	chr5-146413029-146413529	3.97788e-12	-0.210125	0.428	0.472	1.49258e-06	ENSMUST00000110600	ENSMUSG00000029636	protein_coding	gap	chr5-146385339-146421917	0
Morc1	chr16-48422547-48423047	4.02825e-12	-0.645247	0.066	0.096	1.51148e-06	ENSMUST00000023330	ENSMUSG00000022652	protein_coding	exon	chr16-48431237-48431402	8189
Irak2	chr6-113678328-113678828	4.74638e-12	-0.286294	0.28	0.33	1.78094e-06	ENSMUST00000113024	ENSMUSG00000060477	protein_coding	cds	chr6-113678647-113678842	0
Ftx	chrX-103616774-103617274	4.8346e-12	-0.401242	0.16	0.201	1.81404e-06	ENSMUST00000156240	ENSMUSG00000086370	lincRNA	gap	chrX-103615193-103616859	0
Lpin1	chr12-16231997-16232497	6.2758e-12	-0.708464	0.051	0.082	2.35481e-06	ENSMUST00000111067	ENSMUSG00000020593	protein_coding	utr	chr12-16535669-16538412	303171
Gad1-ps	chr10-99488108-99488608	8.55414e-12	-0.522038	0.1	0.139	3.20968e-06	ENSMUST00000167243	ENSMUSG00000090665	protein_coding	utr	chr10-99445819-99447007	41100
Gdf10	chr14-33882997-33883497	8.60747e-12	-0.450338	0.128	0.167	3.22969e-06	ENSMUST00000168727	ENSMUSG00000021943	protein_coding	exon	chr14-33923587-33924202	40089
Atf7ip	chr6-136468442-136468942	8.8659e-12	0.588975	0.114	0.082	3.32666e-06	ENSMUST00000032335	ENSMUSG00000030213	protein_coding	exon	chr6-136518802-136518963	49859
4933407K13Rik	chrX-75729461-75729961	8.93849e-12	-1.62971	0.007	0.022	3.3539e-06	ENSMUST00000138943	ENSMUSG00000087396	processed_transcript	gap	chrX-75727519-75731019	0
Ezr	chr17-6771624-6772124	9.19813e-12	-0.516963	0.1	0.139	3.45132e-06	ENSMUST00000064234	ENSMUSG00000052397	protein_coding	gap	chr17-6759563-6782631	0
Sfrp5	chr19-42209695-42210195	1.31307e-11	-0.603328	0.075	0.106	4.92691e-06	ENSMUST00000018966	ENSMUSG00000018822	protein_coding	exon	chr19-42201492-42202252	7442
Cd101	chr3-101012206-101012706	2.17369e-11	-0.339992	0.204	0.247	8.15614e-06	ENSMUST00000167086	ENSMUSG00000086564	protein_coding	gap	chr3-101012191-101012987	0
Trio	chr15-27783017-27783517	2.19375e-11	-0.49114	0.108	0.149	8.23138e-06	ENSMUST00000090247	ENSMUSG00000022263	protein_coding	gap	chr15-27774174-27805629	0
Nfix	chr8-84788819-84789319	2.54461e-11	-0.560715	0.08	0.111	9.5479e-06	ENSMUST00000126806	ENSMUSG00000001911	protein_coding	gap	chr8-84772316-84799997	0
Eif2s3x	chrX-94212427-94212927	3.17288e-11	-0.413996	0.146	0.178	1.19053e-05	ENSMUST00000113922	ENSMUSG00000035150	protein_coding	cds	chrX-94212565-94212633	0
Klhl2	chr8-64880754-64881254	3.3444e-11	-0.373712	0.172	0.212	1.25489e-05	ENSMUST00000034017	ENSMUSG00000031605	protein_coding	exon	chr8-64849633-64849818	30935
Lypd6	chr2-50095265-50095765	3.39607e-11	-0.462552	0.11	0.149	1.27428e-05	ENSMUST00000128451	ENSMUSG00000050447	protein_coding	gap	chr2-50066585-50165468	0
Nav2	chr7-49529358-49529858	3.46784e-11	-0.43217	0.127	0.164	1.3012e-05	ENSMUST00000184945	ENSMUSG00000052512	protein_coding	gap	chr7-49491492-49535893	0
Mdga2	chr12-67212748-67213248	4.35714e-11	-0.352089	0.185	0.23	1.63488e-05	ENSMUST00000179577	ENSMUSG00000034912	protein_coding	gap	chr12-67197960-67220969	0
Auts2	chr5-131657702-131658202	4.85354e-11	-0.705169	0.047	0.075	1.82114e-05	ENSMUST00000182974	ENSMUSG00000029673	protein_coding	gap	chr5-131533873-131770759	0
Mirg	chr12-109911133-109911633	4.89878e-11	-0.433946	0.133	0.17	1.83812e-05	ENSMUST00000182499	ENSMUSG00000097391	lincRNA	exon	chr12-109749095-109749460	161672
Gm21989	chr12-20990208-20990708	6.18265e-11	0.587216	0.102	0.071	2.31986e-05	ENSMUST00000174530	ENSMUSG00000090370	processed_transcript	exon	chr12-20990459-20990872	0
Firre	chrX-50569063-50569563	7.66426e-11	-1.17276	0.015	0.033	2.87579e-05	ENSMUST00000124842	ENSMUSG00000085396	processed_transcript	gap	chrX-50564968-50615360	0
Farp2	chr1-93609456-93609956	7.94798e-11	-0.306964	0.225	0.273	2.98224e-05	ENSMUST00000120301	ENSMUSG00000034066	protein_coding	gap	chr1-93607671-93609975	0
Cldn26	chr16-8348645-8349145	8.96943e-11	-0.483411	0.102	0.133	3.36551e-05	ENSMUST00000023400	ENSMUSG00000022715	protein_coding	utr	chr16-8409276-8409528	60130
Ambra1	chr2-91749921-91750421	9.93612e-11	-0.491369	0.099	0.135	3.72823e-05	ENSMUST00000156496	ENSMUSG00000040506	protein_coding	gap	chr2-91730380-91766446	0
Klf13	chr7-63896775-63897275	1.01881e-10	-0.278039	0.256	0.298	3.82277e-05	ENSMUST00000185175	ENSMUSG00000052040	protein_coding	gap	chr7-63891798-63936229	0
Dusp18	chr11-3902922-3903422	1.09284e-10	-0.261269	0.29	0.337	4.10056e-05	ENSMUST00000055931	ENSMUSG00000047205	protein_coding	utr	chr11-3897579-3901296	1625
Ank	chr15-27571209-27571709	1.19673e-10	-0.440246	0.118	0.156	4.49038e-05	ENSMUST00000022875	ENSMUSG00000022265	protein_coding	cds	chr15-27571559-27571654	0
Mast4	chr13-102940395-102940895	1.20337e-10	-0.391983	0.147	0.184	4.51528e-05	ENSMUST00000194446	ENSMUSG00000034751	protein_coding	gap	chr13-102853920-103007204	0
Katnal1	chr5-148965608-148966108	1.32372e-10	0.777625	0.063	0.038	4.96685e-05	ENSMUST00000147473	ENSMUSG00000041298	protein_coding	gap	chr5-148921413-148981043	0
Sdk2	chr11-113805796-113806296	1.37031e-10	-0.735723	0.044	0.07	5.14169e-05	ENSMUST00000041627	ENSMUSG00000041592	protein_coding	cds	chr11-113806267-113806404	0
Bsx	chr9-40859107-40859607	1.40073e-10	-0.407982	0.138	0.176	5.25581e-05	ENSMUST00000067375	ENSMUSG00000054360	protein_coding	exon	chr9-40874127-40874439	14519
Prex1	chr2-166696599-166697099	1.41831e-10	-0.772549	0.038	0.062	5.32177e-05	ENSMUST00000152238	ENSMUSG00000039621	protein_coding	gap	chr2-166647046-166703472	0
Scd2	chr19-44273704-44274204	1.48663e-10	-0.418714	0.126	0.165	5.57815e-05	ENSMUST00000026221	ENSMUSG00000025203	protein_coding	exon	chr19-44293676-44294411	19471
Prkd1	chr12-50893680-50894180	1.67745e-10	-0.351891	0.178	0.221	6.29414e-05	ENSMUST00000002765	ENSMUSG00000002688	protein_coding	exon	chr12-50648716-50649223	244456
1500015L24Rik	chr19-20467461-20467961	2.04655e-10	-0.350826	0.179	0.22	7.67906e-05	ENSMUST00000179640	ENSMUSG00000094732	lincRNA	exon	chr19-20422259-20422787	44673
Olfr267	chr4-58722686-58723186	2.30165e-10	-0.375422	0.151	0.19	8.63625e-05	ENSMUST00000059608	ENSMUSG00000043385	protein_coding	cds	chr4-58784779-58785720	61592
Dlg4	chr11-70027332-70027832	2.32799e-10	-0.366572	0.158	0.198	8.7351e-05	ENSMUST00000135916	ENSMUSG00000020886	protein_coding	gap	chr11-70026989-70030398	0
Hao1	chr2-134189639-134190139	2.74026e-10	0.686109	0.078	0.05	0.00010282	ENSMUST00000028704	ENSMUSG00000027261	protein_coding	utr	chr2-134497361-134498256	307221
Mast4	chr13-102811089-102811589	2.87094e-10	-0.355258	0.165	0.207	0.000107723	ENSMUST00000194446	ENSMUSG00000034751	protein_coding	gap	chr13-102810571-102853830	0
Gfra1	chr19-58214327-58214827	3.09768e-10	-0.300609	0.225	0.264	0.000116231	ENSMUST00000026076	ENSMUSG00000025089	protein_coding	utr	chr19-58235604-58238390	20776
Ssx2ip	chr3-146375133-146375633	3.13342e-10	-0.284147	0.244	0.291	0.000117572	ENSMUST00000106153	ENSMUSG00000036825	protein_coding	exon	chr3-146404642-146404784	29008
Sash1	chr10-8752319-8752819	3.18313e-10	-0.30915	0.21	0.25	0.000119438	ENSMUST00000015449	ENSMUSG00000015305	protein_coding	gap	chr10-8751486-8756628	0
Firre	chrX-50616940-50617440	3.21153e-10	-1.18658	0.014	0.031	0.000120503	ENSMUST00000143999	ENSMUSG00000085396	processed_transcript	gap	chrX-50615516-50626436	0
Adamts20	chr15-94430669-94431169	3.49031e-10	-0.427998	0.123	0.156	0.000130963	ENSMUST00000128797	ENSMUSG00000022449	protein_coding	gap	chr15-94418240-94465305	0
Trio	chr15-27783554-27784054	3.92264e-10	-0.339395	0.185	0.228	0.000147185	ENSMUST00000090247	ENSMUSG00000022263	protein_coding	gap	chr15-27774174-27805629	0
Dock4	chr12-40464214-40464714	4.17912e-10	-0.240126	0.308	0.353	0.000156809	ENSMUST00000037488	ENSMUSG00000035954	protein_coding	gap	chr12-40446395-40621220	0
Tnik	chr3-28225446-28225946	4.27357e-10	-0.277342	0.253	0.293	0.000160353	ENSMUST00000160934	ENSMUSG00000027692	protein_coding	exon	chr3-28263214-28263699	37267
Etnk2	chr1-133367674-133368174	4.66459e-10	-0.634741	0.056	0.082	0.000175025	ENSMUST00000156832	ENSMUSG00000070644	protein_coding	gap	chr1-133365836-133368749	0
Plekhf2	chr4-10972897-10973397	4.82933e-10	-0.239412	0.313	0.354	0.000181206	ENSMUST00000054776	ENSMUSG00000049969	protein_coding	utr	chr4-10988662-10990590	15264
Npas2	chr1-39267104-39267604	5.44606e-10	-0.639534	0.052	0.085	0.000204347	ENSMUST00000173050	ENSMUSG00000026077	protein_coding	gap	chr1-39263376-39287467	0
Trpm3	chr19-22630592-22631092	5.66858e-10	-0.406903	0.128	0.167	0.000212696	ENSMUST00000099569	ENSMUSG00000052387	protein_coding	gap	chr19-22139302-22697421	0
Ift27	chr15-78166244-78166744	5.8953e-10	-0.244075	0.293	0.337	0.000221203	ENSMUST00000016781	ENSMUSG00000016637	protein_coding	gap	chr15-78166034-78167069	0
Gm29418	chr17-85853174-85853674	6.10148e-10	-0.472728	0.095	0.127	0.00022894	ENSMUST00000186162	ENSMUSG00000100345	lincRNA	exon	chr17-85823933-85824044	29129
Cbx7	chr15-79956406-79956906	6.24932e-10	-1.02761	0.018	0.035	0.000234487	ENSMUST00000132821	ENSMUSG00000053411	protein_coding	gap	chr15-79930630-79970868	0
2900052N01Rik	chr9-46909537-46910037	7.73371e-10	-0.238232	0.305	0.348	0.000290184	ENSMUST00000191603	ENSMUSG00000099696	lincRNA	exon	chr9-46913493-46913746	3455
F630040K05Rik	chr17-45896406-45896906	7.9597e-10	-0.365407	0.155	0.195	0.000298664	ENSMUST00000180519	ENSMUSG00000097727	lincRNA	exon	chr17-45786109-45788594	107811
2410080I02Rik	chr19-23134117-23134617	7.98537e-10	-0.438746	0.11	0.147	0.000299627	ENSMUST00000142712	ENSMUSG00000044387	lincRNA	exon	chr19-23134900-23134954	282
Fam21	chr6-116235312-116235812	8.91616e-10	-0.432985	0.113	0.147	0.000334552	ENSMUST00000036759	ENSMUSG00000024104	protein_coding	gap	chr6-116231629-116236096	0
Gm26843	chr8-93731118-93731618	9.30445e-10	-0.276589	0.248	0.291	0.000349122	ENSMUST00000181864	ENSMUSG00000097520	lincRNA	exon	chr8-93750147-93752635	18528
Msi2	chr11-88654939-88655439	1.03593e-09	-0.507693	0.084	0.115	0.0003887	ENSMUST00000144699	ENSMUSG00000069769	protein_coding	gap	chr11-88590148-88712437	0
Xist	chrX-103483014-103483514	1.26648e-09	-1.79128	0.004	0.015	0.000475209	ENSMUST00000127786	ENSMUSG00000086503	lincRNA	exon	chrX-103473716-103483217	0
2610035D17Rik	chr11-113188253-113188753	1.43827e-09	-0.248343	0.285	0.329	0.000539669	ENSMUST00000145206	ENSMUSG00000087259	lincRNA	gap	chr11-113045163-113201288	0
Smim3	chr18-60495560-60496060	1.44103e-09	-0.333866	0.178	0.218	0.000540703	ENSMUST00000042710	ENSMUSG00000038059	protein_coding	gap	chr18-60475586-60501392	0
Msantd3	chr4-48552281-48552781	1.46999e-09	-0.358225	0.155	0.189	0.000551569	ENSMUST00000107704	ENSMUSG00000039693	protein_coding	cds	chr4-48552413-48552830	0
Irak2	chr6-113644770-113645270	1.53873e-09	-0.249062	0.279	0.324	0.000577361	ENSMUST00000089023	ENSMUSG00000060477	protein_coding	gap	chr6-113638642-113665702	0
Igsf5	chr16-96357861-96358361	1.58995e-09	0.965839	0.039	0.019	0.000596582	ENSMUST00000113794	ENSMUSG00000000159	protein_coding	exon	chr16-96361668-96361844	3306
Myc	chr15-61523087-61523587	1.6357e-09	-0.565692	0.062	0.093	0.000613747	ENSMUST00000188482	ENSMUSG00000022346	protein_coding	exon	chr15-61985341-61985951	461753
Nupr1	chr7-126625365-126625865	1.67561e-09	0.522385	0.11	0.08	0.000628723	ENSMUST00000032961	ENSMUSG00000030717	protein_coding	cds	chr7-126625323-126625434	0
Pxylp1	chr9-96869823-96870323	1.76879e-09	-0.530559	0.074	0.103	0.000663685	ENSMUST00000154146	ENSMUSG00000043587	protein_coding	gap	chr9-96856500-96892605	0
Bai1	chr15-74484007-74484507	1.78614e-09	-0.403411	0.126	0.164	0.000670196	ENSMUST00000042035	ENSMUSG00000034730	protein_coding	exon	chr15-74516195-74516866	31687
Firre	chrX-50602320-50602820	1.80307e-09	-1.09288	0.015	0.034	0.000676547	ENSMUST00000124842	ENSMUSG00000085396	processed_transcript	gap	chrX-50564968-50615360	0
Slc4a4	chr5-88990150-88990650	1.944e-09	-0.255445	0.268	0.314	0.000729429	ENSMUST00000156238	ENSMUSG00000060961	protein_coding	gap	chr5-88954958-89028292	0
Extl1	chr4-134368378-134368878	1.99888e-09	-0.584536	0.058	0.087	0.00075002	ENSMUST00000132387	ENSMUSG00000028838	protein_coding	gap	chr4-134364989-134383709	0
A930005H10Rik	chr3-115855495-115855995	2.08285e-09	-0.290122	0.222	0.254	0.000781527	ENSMUST00000188260	ENSMUSG00000054426	processed_transcript	exon	chr3-115881581-115881838	25585
Gm10542	chr18-44210255-44210755	2.13164e-09	-0.456956	0.1	0.128	0.000799834	ENSMUST00000097586	ENSMUSG00000073572	protein_coding	cds	chr18-44205976-44206018	4236
Firre	chrX-50549677-50550177	2.15476e-09	-0.984528	0.02	0.036	0.000808508	ENSMUST00000124842	ENSMUSG00000085396	processed_transcript	exon	chrX-50555744-50555929	5566
Gm8098	chr11-30289697-30290197	2.16017e-09	-0.427319	0.113	0.147	0.000810539	ENSMUST00000146985	ENSMUSG00000073073	processed_transcript	exon	chr11-30279440-30280491	9205
Hip1	chr5-135465734-135466234	2.46679e-09	-0.260253	0.26	0.295	0.000925587	ENSMUST00000060311	ENSMUSG00000039959	protein_coding	gap	chr5-135460471-135544936	0
Pitpnm2	chr5-124187802-124188302	2.54546e-09	-0.208964	0.353	0.388	0.000955107	ENSMUST00000162812	ENSMUSG00000029406	protein_coding	gap	chr5-124152720-124216315	0
Dapk1	chr13-60605785-60606285	2.61599e-09	-0.801955	0.031	0.051	0.000981574	ENSMUST00000077453	ENSMUSG00000021559	protein_coding	gap	chr13-60602597-60696230	0
Pdk2	chr11-95031532-95032032	2.72829e-09	-0.51475	0.077	0.106	0.00102371	ENSMUST00000038431	ENSMUSG00000038967	protein_coding	cds	chr11-95031836-95032020	0
Rora	chr9-69120982-69121482	2.89478e-09	-0.612564	0.054	0.078	0.00108618	ENSMUST00000174296	ENSMUSG00000032238	protein_coding	gap	chr9-68653973-69196074	0
Rapgef3	chr15-97745308-97745808	2.90218e-09	-0.30853	0.195	0.227	0.00108896	ENSMUST00000177352	ENSMUSG00000022469	protein_coding	cds	chr15-97745548-97745666	0
1500015L24Rik	chr19-20492424-20492924	3.01482e-09	-0.565543	0.065	0.092	0.00113122	ENSMUST00000179640	ENSMUSG00000094732	lincRNA	exon	chr19-20422259-20422787	69636
Pcdh1	chr18-38185778-38186278	3.01551e-09	0.571576	0.091	0.062	0.00113148	ENSMUST00000160721	ENSMUSG00000051375	protein_coding	utr	chr18-38185914-38189942	0
Lmo4	chr3-143914521-143915021	3.06441e-09	-0.383285	0.138	0.173	0.00114983	ENSMUST00000121796	ENSMUSG00000028266	protein_coding	utr	chr3-144188530-144189296	273508
Gabbr2	chr4-46731587-46732087	3.1289e-09	-0.225679	0.322	0.358	0.00117403	ENSMUST00000107749	ENSMUSG00000039809	protein_coding	gap	chr4-46724392-46734057	0
Mfsd2a	chr4-122958364-122958864	3.17936e-09	-0.258268	0.265	0.306	0.00119296	ENSMUST00000152308	ENSMUSG00000028655	protein_coding	gap	chr4-122956857-122959269	0
Cipc	chr12-86932147-86932647	3.33896e-09	-0.476916	0.091	0.119	0.00125284	ENSMUST00000185434	ENSMUSG00000034157	protein_coding	exon	chr12-86947043-86947250	14395
Ccdc34	chr2-110134888-110135388	3.34141e-09	-0.177322	0.45	0.484	0.00125376	ENSMUST00000150183	ENSMUSG00000027160	protein_coding	gap	chr2-110022015-110172450	0
F630040K05Rik	chr17-45760869-45761369	3.42769e-09	-0.474544	0.09	0.118	0.00128614	ENSMUST00000180558	ENSMUSG00000097727	lincRNA	gap	chr17-45749357-45776157	0
4933407K13Rik	chrX-75750304-75750804	3.52087e-09	-1.38925	0.009	0.02	0.0013211	ENSMUST00000140409	ENSMUSG00000087396	processed_transcript	gap	chrX-75741979-75751524	0
Nubpl	chr12-52412984-52413484	3.55696e-09	-0.266792	0.25	0.286	0.00133464	ENSMUST00000040090	ENSMUSG00000035142	protein_coding	utr	chr12-52310765-52312744	100239
Oacyl	chr18-65708048-65708548	3.92292e-09	-0.604465	0.05	0.077	0.00147196	ENSMUST00000117694	ENSMUSG00000046610	protein_coding	gap	chr18-65698442-65720191	0
Apc2	chr10-80302413-80302913	3.9319e-09	-0.239096	0.286	0.33	0.00147533	ENSMUST00000105359	ENSMUSG00000020135	protein_coding	cds	chr10-80302314-80302494	0
Kif1c	chr11-70729323-70729823	4.16448e-09	-0.693732	0.04	0.064	0.0015626	ENSMUST00000137119	ENSMUSG00000020821	protein_coding	utr	chr11-70728880-70731964	0
Tspan7	chrX-10450001-10450501	4.35722e-09	-0.233672	0.314	0.356	0.00163492	ENSMUST00000076354	ENSMUSG00000058254	protein_coding	exon	chrX-10485158-10485238	34656
Mcu	chr10-59628632-59629132	4.45957e-09	-0.253021	0.274	0.311	0.00167332	ENSMUST00000020312	ENSMUSG00000009647	protein_coding	exon	chr10-59616524-59616692	11939
Cdc42bpa	chr1-180023490-180023990	4.53214e-09	-0.535113	0.067	0.096	0.00170055	ENSMUST00000143350	ENSMUSG00000026490	protein_coding	gap	chr1-179999454-180031504	0
Snd1	chr6-28929314-28929814	4.97571e-09	-0.646932	0.046	0.069	0.00186699	ENSMUST00000167201	ENSMUSG00000001424	protein_coding	gap	chr6-28795939-28933366	0
Akt2	chr7-27620888-27621388	5.03405e-09	-0.272203	0.234	0.269	0.00188888	ENSMUST00000167435	ENSMUSG00000004056	protein_coding	gap	chr7-27618320-27628836	0
Bcor	chrX-11898196-11898696	5.03718e-09	-0.316717	0.181	0.217	0.00189005	ENSMUST00000124033	ENSMUSG00000040363	protein_coding	utr	chrX-12036740-12037625	138043
Taf8	chr17-47484314-47484814	5.12556e-09	0.448556	0.138	0.103	0.00192321	ENSMUST00000067103	ENSMUSG00000023980	protein_coding	utr	chr17-47488050-47489883	3235
Mrps6	chr16-92158399-92158899	5.25858e-09	0.373636	0.186	0.139	0.00197313	ENSMUST00000047429	ENSMUSG00000039680	protein_coding	utr	chr16-92111926-92112227	46171
Aatk	chr11-120019418-120019918	5.60235e-09	-0.424432	0.108	0.139	0.00210211	ENSMUST00000150730	ENSMUSG00000025375	protein_coding	gap	chr11-120018893-120021401	0
Taf13	chr3-108567928-108568428	5.66462e-09	-0.262781	0.242	0.285	0.00212548	ENSMUST00000131814	ENSMUSG00000048100	protein_coding	exon	chr3-108571698-108571752	3269
Hoxb6	chr11-96301759-96302259	6.04397e-09	-0.256022	0.242	0.28	0.00226782	ENSMUST00000173432	ENSMUSG00000000690	protein_coding	utr	chr11-96300929-96301569	189
Vil1	chr1-74415026-74415526	6.62529e-09	0.62353	0.075	0.049	0.00248594	ENSMUST00000027366	ENSMUSG00000026175	protein_coding	cds	chr1-74415080-74415154	0
Tmc7	chr7-118578427-118578927	6.98671e-09	-0.335085	0.177	0.208	0.00262155	ENSMUST00000153635	ENSMUSG00000042246	protein_coding	gap	chr7-118566426-118584603	0
Prkca	chr11-108023121-108023621	7.11325e-09	-0.342231	0.153	0.191	0.00266903	ENSMUST00000059595	ENSMUSG00000050965	protein_coding	gap	chr11-108014382-108053974	0
Gm28195	chr9-68131268-68131768	7.18403e-09	-0.290283	0.203	0.24	0.00269559	ENSMUST00000186992	ENSMUSG00000101345	lincRNA	exon	chr9-68235029-68235400	103260
E130114P18Rik	chr4-97676498-97676998	7.8079e-09	-0.428205	0.107	0.134	0.00292968	ENSMUST00000186369	ENSMUSG00000048747	protein_coding	gap	chr4-97574922-97690622	0
Clmn	chr12-104827489-104827989	9.07895e-09	-0.50479	0.078	0.103	0.0034066	ENSMUST00000109937	ENSMUSG00000021097	protein_coding	gap	chr12-104804671-104864869	0
Pepd	chr7-34939154-34939654	9.73971e-09	-0.332991	0.159	0.195	0.00365453	ENSMUST00000075068	ENSMUSG00000063931	protein_coding	gap	chr7-34934746-34942638	0
n-R5s96	chr8-47763752-47764252	1.01282e-08	-0.510352	0.076	0.106	0.00380031	ENSMUST00000082574	ENSMUSG00000064508	rRNA	exon	chr8-47719246-47719369	44382
Eif2s3x	chrX-94177732-94178232	1.02698e-08	-0.257979	0.242	0.279	0.00385345	ENSMUST00000050328	ENSMUSG00000035150	protein_coding	utr	chrX-94188707-94190858	10474
Pfkp	chr13-6664457-6664957	1.0888e-08	-0.395721	0.121	0.147	0.00408539	ENSMUST00000138703	ENSMUSG00000021196	protein_coding	exon	chr13-6648571-6648777	15679
Cep85	chr4-134160036-134160536	1.19828e-08	1.31058	0.021	0.008	0.00449618	ENSMUST00000137388	ENSMUSG00000037443	protein_coding	gap	chr4-134156372-134164627	0
Dpp9	chr17-56185444-56185944	1.20531e-08	-0.404555	0.113	0.147	0.00452256	ENSMUST00000038794	ENSMUSG00000001229	protein_coding	utr	chr17-56186682-56187368	737
Med30	chr15-52705461-52705961	1.25073e-08	0.345606	0.208	0.169	0.00469298	ENSMUST00000037115	ENSMUSG00000038622	protein_coding	exon	chr15-52712445-52712686	6483
Slc34a3	chr2-25226741-25227241	1.51616e-08	-0.31945	0.167	0.205	0.00568895	ENSMUST00000006638	ENSMUSG00000006469	protein_coding	utr	chr2-25228898-25229050	1656
Usp12	chr5-146692347-146692847	1.65688e-08	-0.291004	0.194	0.235	0.00621693	ENSMUST00000085614	ENSMUSG00000029640	protein_coding	utr	chr5-146734809-146737678	41961
Med9	chr11-59961533-59962033	1.69325e-08	-0.554377	0.061	0.084	0.00635341	ENSMUST00000081980	ENSMUSG00000061650	protein_coding	utr	chr11-59960776-59962205	0
Gli3	chr13-15562343-15562843	1.71308e-08	-0.448944	0.087	0.123	0.00642782	ENSMUST00000141194	ENSMUSG00000021318	protein_coding	gap	chr13-15463409-15613778	0
Gad1-ps	chr10-99488631-99489131	1.78914e-08	-0.301386	0.178	0.22	0.0067132	ENSMUST00000167243	ENSMUSG00000090665	protein_coding	utr	chr10-99445819-99447007	41623
Hccs	chrX-169320256-169320756	1.8174e-08	0.195059	0.427	0.38	0.00681926	ENSMUST00000154638	ENSMUSG00000031352	protein_coding	utr	chrX-169320175-169320372	0
Rrp8	chr7-105728983-105729483	1.85409e-08	-0.229386	0.286	0.325	0.00695693	ENSMUST00000033179	ENSMUSG00000030888	protein_coding	utr	chr7-105732207-105733023	2723
Lfng	chr5-140608611-140609111	1.97173e-08	-0.240062	0.269	0.3	0.00739832	ENSMUST00000031555	ENSMUSG00000029570	protein_coding	gap	chr5-140607845-140611849	0
Cep128	chr12-91050483-91050983	1.99001e-08	-0.247423	0.26	0.297	0.00746692	ENSMUST00000143415	ENSMUSG00000061533	protein_coding	gap	chr12-91022478-91063141	0
Ctdspl	chr9-119005642-119006142	2.01486e-08	-0.459036	0.089	0.113	0.00756017	ENSMUST00000174841	ENSMUSG00000047409	protein_coding	gap	chr9-118929933-119011234	0
Gm4419	chr12-21543210-21543710	2.05861e-08	-0.688042	0.037	0.057	0.00772431	ENSMUST00000180671	ENSMUSG00000097055	lincRNA	exon	chr12-21418999-21419803	123406
Tank	chr2-61597605-61598105	2.06499e-08	-0.300662	0.186	0.224	0.00774826	ENSMUST00000145632	ENSMUSG00000064289	protein_coding	gap	chr2-61578694-61613650	0
Alk	chr17-72565831-72566331	2.17304e-08	-0.621348	0.047	0.069	0.00815366	ENSMUST00000086639	ENSMUSG00000055471	protein_coding	gap	chr17-72380162-72603027	0
Nfkbiz	chr16-55571034-55571534	2.42774e-08	-0.489998	0.073	0.103	0.00910938	ENSMUST00000114458	ENSMUSG00000035356	protein_coding	utr	chr16-55811375-55812729	239840
Irf2	chr8-46769747-46770247	2.59952e-08	-0.149159	0.486	0.524	0.00975391	ENSMUST00000034041	ENSMUSG00000031627	protein_coding	gap	chr8-46739937-46793492	0
Gm28237	chr1-24971860-24972360	2.67543e-08	-1.02199	0.015	0.03	0.0100387	ENSMUST00000189477	ENSMUSG00000100483	lincRNA	exon	chr1-24964804-24965158	6701
Mbnl1	chr3-60494992-60495492	2.69595e-08	0.936819	0.036	0.019	0.0101157	ENSMUST00000195724	ENSMUSG00000027763	protein_coding	gap	chr3-60473174-60595593	0
Mir22hg	chr11-75459295-75459795	2.75326e-08	-0.401061	0.107	0.14	0.0103308	ENSMUST00000149940	ENSMUSG00000085148	processed_transcript	exon	chr11-75461539-75461755	1743
Cd101	chr3-100998105-100998605	2.79446e-08	-0.424283	0.098	0.131	0.0104854	ENSMUST00000167086	ENSMUSG00000086564	protein_coding	gap	chr3-100993895-101003480	0
Abr	chr11-76562575-76563075	2.80827e-08	-0.165871	0.429	0.469	0.0105372	ENSMUST00000176179	ENSMUSG00000017631	protein_coding	gap	chr11-76509073-76577506	0
Dab2ip	chr2-35612210-35612710	3.02182e-08	-0.389083	0.115	0.147	0.0113385	ENSMUST00000135741	ENSMUSG00000026883	protein_coding	gap	chr2-35583050-35643887	0
St8sia1	chr6-142920826-142921326	3.19734e-08	-0.508911	0.068	0.093	0.0119971	ENSMUST00000032421	ENSMUSG00000030283	protein_coding	gap	chr6-142914169-142963535	0
Fam20a	chr11-109754064-109754564	3.23781e-08	-0.15466	0.471	0.512	0.0121489	ENSMUST00000155559	ENSMUSG00000020614	protein_coding	exon	chr11-109721312-109722279	31784
Rrm2	chr12-24758254-24758754	3.26986e-08	-0.416857	0.099	0.128	0.0122692	ENSMUST00000020980	ENSMUSG00000020649	protein_coding	utr	chr12-24713233-24714146	44107
Slc25a33	chr4-149758339-149758839	3.40787e-08	-0.409747	0.102	0.132	0.012787	ENSMUST00000105686	ENSMUSG00000028982	protein_coding	gap	chr4-149756153-149762366	0
Gm15083	chr6-114076545-114077045	3.78966e-08	-0.338362	0.141	0.173	0.0142196	ENSMUST00000138670	ENSMUSG00000087083	lincRNA	exon	chr6-114051062-114052108	24436
Gm21989	chr12-21190193-21190693	3.88674e-08	0.437642	0.129	0.097	0.0145838	ENSMUST00000174530	ENSMUSG00000090370	processed_transcript	gap	chr12-21185244-21199543	0
Gm13708	chr2-73463767-73464267	3.9202e-08	-0.563843	0.056	0.08	0.0147094	ENSMUST00000145170	ENSMUSG00000086069	lincRNA	gap	chr2-73459742-73477249	0
Mt2	chr8-94171370-94171870	3.97007e-08	-0.421939	0.1	0.127	0.0148965	ENSMUST00000034214	ENSMUSG00000031762	protein_coding	exon	chr8-94172618-94172875	747
Snx2	chr18-53160785-53161285	4.3408e-08	-0.338088	0.148	0.174	0.0162876	ENSMUST00000037850	ENSMUSG00000034484	protein_coding	exon	chr18-53176365-53176487	15079
Gm13816	chr2-92728311-92728811	4.37501e-08	-0.35185	0.136	0.164	0.0164159	ENSMUST00000152230	ENSMUSG00000085976	lincRNA	exon	chr2-92742230-92742676	13418
Gm10556	chr18-4839902-4840402	4.57807e-08	-0.197887	0.333	0.373	0.0171778	ENSMUST00000180904	ENSMUSG00000097043	lincRNA	gap	chr18-4831263-4844873	0
Mirg	chr12-109830226-109830726	4.64482e-08	-0.586832	0.051	0.076	0.0174283	ENSMUST00000182499	ENSMUSG00000097391	lincRNA	exon	chr12-109749095-109749460	80765
Lhx2	chr2-38359822-38360322	4.89131e-08	-0.44914	0.086	0.11	0.0183532	ENSMUST00000143783	ENSMUSG00000000247	protein_coding	cds	chr2-38359898-38360103	0
Asap1	chr15-64118382-64118882	4.90707e-08	-0.290319	0.187	0.222	0.0184123	ENSMUST00000177374	ENSMUSG00000022377	protein_coding	gap	chr15-64111077-64119957	0
Vps33a	chr5-123556405-123556905	5.05821e-08	-0.436844	0.086	0.111	0.0189794	ENSMUST00000031388	ENSMUSG00000029434	protein_coding	gap	chr5-123547129-123558613	0
Sorl1	chr9-42183310-42183810	5.68498e-08	-0.290738	0.187	0.219	0.0213312	ENSMUST00000060989	ENSMUSG00000049313	protein_coding	exon	chr9-42123829-42124297	59012
Adamts9	chr6-92850149-92850649	5.77329e-08	-0.245324	0.239	0.279	0.0216625	ENSMUST00000167391	ENSMUSG00000030022	protein_coding	gap	chr6-92849469-92854203	0
Atp1b2	chr11-69600003-69600503	5.79641e-08	-0.249728	0.238	0.272	0.0217493	ENSMUST00000047889	ENSMUSG00000041329	protein_coding	utr	chr11-69599736-69601247	0
Hs3st1	chr5-39824592-39825092	6.12844e-08	-0.88985	0.019	0.037	0.0229951	ENSMUST00000117944	ENSMUSG00000051022	protein_coding	exon	chr5-39755310-39755475	69116
Grik3	chr4-125437260-125437760	6.46013e-08	-1.17406	0.011	0.022	0.0242397	ENSMUST00000030676	ENSMUSG00000001985	protein_coding	exon	chr4-125490700-125490945	52939
Pde8b	chr13-95081014-95081514	6.53976e-08	-0.317754	0.159	0.192	0.0245385	ENSMUST00000172104	ENSMUSG00000021684	protein_coding	gap	chr13-95052931-95083113	0
Mphosph6	chr8-117959423-117959923	7.05246e-08	0.389949	0.154	0.119	0.0264623	ENSMUST00000034303	ENSMUSG00000031843	protein_coding	exon	chr8-117801852-117801929	157493
Smim3	chr18-60491244-60491744	7.08348e-08	-0.25222	0.235	0.27	0.0265786	ENSMUST00000042710	ENSMUSG00000038059	protein_coding	gap	chr18-60475586-60501392	0
Dok7	chr5-35056537-35057037	7.09339e-08	-0.265638	0.215	0.249	0.0266158	ENSMUST00000133381	ENSMUSG00000044716	protein_coding	cds	chr5-35056935-35056964	0
Fzd1	chr5-4496111-4496611	7.22051e-08	-0.190102	0.343	0.384	0.0270928	ENSMUST00000054294	ENSMUSG00000044674	protein_coding	utr	chr5-4753873-4755651	257261
Hist1h2bk	chr13-22035442-22035942	7.60609e-08	0.27116	0.257	0.217	0.0285396	ENSMUST00000110455	ENSMUSG00000062727	protein_coding	cds	chr13-22035887-22036267	0
Mybpc1	chr10-88590949-88591449	7.82583e-08	-0.523382	0.059	0.083	0.0293641	ENSMUST00000121629	ENSMUSG00000020061	protein_coding	gap	chr10-88585696-88604900	0
Sufu	chr19-46477511-46478011	8.82642e-08	0.285617	0.239	0.2	0.0331185	ENSMUST00000111867	ENSMUSG00000025231	protein_coding	gap	chr19-46475647-46483599	0
Hemk1	chr9-107323457-107323957	8.83712e-08	-0.637818	0.041	0.058	0.0331586	ENSMUST00000035196	ENSMUSG00000032579	protein_coding	utr	chr9-107327084-107328035	3126
Neurog1	chr13-56270109-56270609	9.30027e-08	-0.191824	0.339	0.374	0.0348965	ENSMUST00000058475	ENSMUSG00000048904	protein_coding	exon	chr13-56250505-56252163	17945
Tcf4	chr18-69607985-69608485	9.38453e-08	-0.202346	0.321	0.353	0.0352126	ENSMUST00000145918	ENSMUSG00000053477	protein_coding	gap	chr18-69599695-69633576	0
A930011G23Rik	chr5-99504280-99504780	9.68227e-08	0.632114	0.065	0.042	0.0363298	ENSMUST00000161516	ENSMUSG00000089809	protein_coding	gap	chr5-99377176-99558891	0
Pak4	chr7-28411079-28411579	9.84298e-08	-0.712929	0.033	0.053	0.0369328	ENSMUST00000040531	ENSMUSG00000030602	protein_coding	gap	chr7-28408176-28413871	0
Hivep2	chr10-14081738-14082238	9.85485e-08	-0.760538	0.027	0.044	0.0369774	ENSMUST00000191138	ENSMUSG00000015501	protein_coding	gap	chr10-14066685-14117518	0
Ccdc51	chr9-109087989-109088489	1.01075e-07	-0.307257	0.16	0.196	0.0379254	ENSMUST00000026735	ENSMUSG00000025645	protein_coding	gap	chr9-109082568-109089336	0
Vps13c	chr9-68094281-68094781	1.04072e-07	-0.244526	0.247	0.279	0.03905	ENSMUST00000077879	ENSMUSG00000035284	protein_coding	utr	chr9-67995390-67995634	98646
Myoz2	chr3-123000888-123001388	1.057e-07	-0.317421	0.152	0.187	0.0396607	ENSMUST00000029761	ENSMUSG00000028116	protein_coding	utr	chr3-123006206-123006382	4817
Prex1	chr2-166694972-166695472	1.08453e-07	-0.314661	0.157	0.192	0.0406937	ENSMUST00000152238	ENSMUSG00000039621	protein_coding	gap	chr2-166647046-166703472	0
Enho	chr4-41648059-41648559	1.10844e-07	-0.242953	0.238	0.278	0.0415909	ENSMUST00000127306	ENSMUSG00000028445	protein_coding	exon	chr4-41639914-41640324	7734
1700108F19Rik	chr14-76749071-76749571	1.12382e-07	-0.256643	0.218	0.251	0.0421681	ENSMUST00000189375	ENSMUSG00000101009	processed_transcript	exon	chr14-76686728-76687169	61901
Ogdhl	chr14-32323162-32323662	1.19016e-07	-0.412316	0.096	0.123	0.0446573	ENSMUST00000022480	ENSMUSG00000021913	protein_coding	gap	chr14-32322117-32323878	0
Etnk1	chr6-143166674-143167174	1.21167e-07	-0.146332	0.476	0.508	0.0454642	ENSMUST00000032413	ENSMUSG00000030275	protein_coding	exon	chr6-143167230-143167636	55
Pcolce2	chr9-95667860-95668360	1.22126e-07	-0.54819	0.054	0.079	0.0458242	ENSMUST00000015498	ENSMUSG00000015354	protein_coding	gap	chr9-95638761-95670004	0
Vamp4	chr1-162589411-162589911	1.37833e-07	-0.323241	0.143	0.173	0.0517177	ENSMUST00000194810	ENSMUSG00000026696	protein_coding	cds	chr1-162589465-162589544	0
Nell2	chr15-95290621-95291121	1.44136e-07	-0.280019	0.187	0.227	0.0540828	ENSMUST00000166170	ENSMUSG00000022454	protein_coding	gap	chr15-95241678-95296158	0
Gm9956	chr10-56880001-56880501	1.45627e-07	-0.499183	0.066	0.089	0.0546422	ENSMUST00000067972	ENSMUSG00000054758	protein_coding	utr	chr10-56745640-56748254	131746
Stat5b	chr11-100790724-100791224	1.49712e-07	-0.290899	0.179	0.213	0.0561749	ENSMUST00000107358	ENSMUSG00000020919	protein_coding	cds	chr11-100790747-100790953	0
Thnsl1	chr2-21263979-21264479	1.58115e-07	-0.462256	0.074	0.099	0.0593277	ENSMUST00000054591	ENSMUSG00000048550	protein_coding	utr	chr2-21213681-21215009	48969
5330429C05Rik	chr13-54912846-54913346	1.62524e-07	-0.36108	0.119	0.144	0.0609821	ENSMUST00000154615	ENSMUSG00000085896	lincRNA	gap	chr13-54913313-54914070	0
Glycam1	chr15-103626973-103627473	1.62891e-07	-0.31796	0.15	0.184	0.0611198	ENSMUST00000023134	ENSMUSG00000022491	protein_coding	exon	chr15-103564968-103565078	61894
Mki67	chr7-136268003-136268503	1.63501e-07	1.94771	0.01	0.003	0.0613488	ENSMUST00000033310	ENSMUSG00000031004	protein_coding	exon	chr7-135716048-135716379	551623
Daam2	chr17-49534106-49534606	1.63955e-07	-0.209699	0.301	0.33	0.0615191	ENSMUST00000057610	ENSMUSG00000040260	protein_coding	gap	chr17-49498932-49564202	0
Plcb1	chr2-134974591-134975091	1.64428e-07	-0.395037	0.102	0.13	0.0616967	ENSMUST00000130524	ENSMUSG00000051177	protein_coding	gap	chr2-134813679-134988123	0
Inpp5a	chr7-139528726-139529226	1.73509e-07	0.357848	0.163	0.131	0.065104	ENSMUST00000152475	ENSMUSG00000025477	protein_coding	gap	chr7-139525782-139538178	0
Tspan7	chrX-10411137-10411637	1.75845e-07	-0.255015	0.218	0.251	0.0659805	ENSMUST00000076354	ENSMUSG00000058254	protein_coding	exon	chrX-10485158-10485238	73520
Zbtb16	chr9-48740099-48740599	1.79468e-07	-0.302526	0.158	0.189	0.0673401	ENSMUST00000093852	ENSMUSG00000066687	protein_coding	gap	chr9-48717370-48743463	0
Limch1	chr5-66866079-66866579	1.80665e-07	-0.342395	0.132	0.162	0.0677891	ENSMUST00000130228	ENSMUSG00000037736	protein_coding	gap	chr5-66857954-66881898	0
Tdgf1	chr9-110933883-110934383	1.82521e-07	-0.204895	0.307	0.343	0.0684857	ENSMUST00000035075	ENSMUSG00000032494	protein_coding	utr	chr9-110939610-110940703	5226
Mgat5	chr1-127160797-127161297	1.82952e-07	-0.305343	0.164	0.199	0.0686472	ENSMUST00000189427	ENSMUSG00000036155	protein_coding	exon	chr1-127205015-127205427	43717
Fbrsl1	chr5-110420899-110421399	1.88935e-07	0.50735	0.093	0.067	0.0708923	ENSMUST00000069483	ENSMUSG00000043323	protein_coding	gap	chr5-110417948-110432900	0
Gdf10	chr14-33896570-33897070	1.89704e-07	-0.363188	0.117	0.146	0.0711808	ENSMUST00000168727	ENSMUSG00000021943	protein_coding	exon	chr14-33923587-33924202	26516
Sdk2	chr11-113806901-113807401	1.90155e-07	-0.669446	0.038	0.056	0.0713499	ENSMUST00000156955	ENSMUSG00000041592	protein_coding	gap	chr11-113806405-113810328	0
Hdac4	chr1-92100441-92100941	1.92966e-07	-0.168468	0.397	0.424	0.0724048	ENSMUST00000187622	ENSMUSG00000026313	protein_coding	gap	chr1-92091819-92113227	0
Gadd45g	chr13-51868519-51869019	1.97808e-07	-0.25082	0.216	0.254	0.0742216	ENSMUST00000021903	ENSMUSG00000021453	protein_coding	utr	chr13-51847980-51848468	20050
Kcnd3	chr3-105364597-105365097	2.04294e-07	-0.218704	0.28	0.311	0.0766551	ENSMUST00000098761	ENSMUSG00000040896	protein_coding	exon	chr3-105452330-105452717	87232
Dek	chr13-47106206-47106706	2.07643e-07	-0.283439	0.183	0.212	0.077912	ENSMUST00000135278	ENSMUSG00000021377	protein_coding	exon	chr13-47106073-47106201	4
Slc1a3	chr15-8815205-8815705	2.10755e-07	-0.170365	0.385	0.425	0.0790795	ENSMUST00000005493	ENSMUSG00000005360	protein_coding	exon	chr15-8710339-8710764	104440
Btg1	chr10-96480455-96480955	2.17425e-07	-0.140579	0.491	0.518	0.0815822	ENSMUST00000038377	ENSMUSG00000036478	protein_coding	exon	chr10-96617001-96617472	136045
Dlg4	chr11-70026597-70027097	2.35768e-07	-0.263124	0.201	0.23	0.0884647	ENSMUST00000134376	ENSMUSG00000020886	protein_coding	cds	chr11-70026923-70027087	0
Kazn	chr4-142159992-142160492	2.37251e-07	-0.298253	0.16	0.189	0.0890214	ENSMUST00000174432	ENSMUSG00000040606	protein_coding	gap	chr4-142159181-142210014	0
Hs1bp3	chr12-8344726-8345226	2.3925e-07	-0.236614	0.238	0.275	0.0897714	ENSMUST00000020927	ENSMUSG00000020605	protein_coding	utr	chr12-8342088-8343824	901
Edem3	chr1-151824910-151825410	2.42033e-07	-0.648169	0.036	0.054	0.0908158	ENSMUST00000059498	ENSMUSG00000043019	protein_coding	utr	chr1-151818714-151822051	2858
Otud7a	chr7-63462625-63463125	2.4421e-07	-0.280186	0.181	0.21	0.0916325	ENSMUST00000176734	ENSMUSG00000033510	protein_coding	gap	chr7-63444928-63615288	0
5031434O11Rik	chr3-51611867-51612367	2.54491e-07	-0.531886	0.051	0.074	0.0954902	ENSMUST00000180404	ENSMUSG00000097885	lincRNA	exon	chr3-51566838-51567117	44749
Cspg5	chr9-110245892-110246392	2.57328e-07	0.332319	0.184	0.151	0.0965548	ENSMUST00000035058	ENSMUSG00000032482	protein_coding	cds	chr9-110246295-110247390	0
RP24-92E18.1	chr3-52685611-52686111	2.62151e-07	-0.594298	0.044	0.062	0.0983643	ENSMUST00000193813	ENSMUSG00000102785	lincRNA	exon	chr3-52739716-52739856	53604
Grm8	chr6-27746084-27746584	2.63974e-07	-0.481389	0.071	0.092	0.0990485	ENSMUST00000115324	ENSMUSG00000024211	protein_coding	gap	chr6-27618686-27760173	0
Tesk2	chr4-116774735-116775235	2.68001e-07	-0.401096	0.094	0.121	0.100559	ENSMUST00000142529	ENSMUSG00000033985	protein_coding	gap	chr4-116771849-116792087	0
Hs1bp3	chr12-8364186-8364686	2.85308e-07	-0.17486	0.369	0.409	0.107053	ENSMUST00000020927	ENSMUSG00000020605	protein_coding	utr	chr12-8342088-8343824	20361
Diap3	chr14-86951099-86951599	2.8689e-07	-0.802841	0.021	0.038	0.107647	ENSMUST00000168889	ENSMUSG00000022021	protein_coding	gap	chr14-86918865-86965441	0
Zfp608	chr18-54885496-54885996	3.05692e-07	0.484051	0.094	0.068	0.114702	ENSMUST00000064763	ENSMUSG00000052713	protein_coding	utr	chr18-54888045-54889074	2048
Dr1	chr5-108262700-108263200	3.11681e-07	-0.309504	0.15	0.181	0.116949	ENSMUST00000031190	ENSMUSG00000029265	protein_coding	exon	chr5-108268897-108269809	5696
Sall1	chr8-88992004-88992504	3.16352e-07	0.385799	0.142	0.109	0.118702	ENSMUST00000034090	ENSMUSG00000031665	protein_coding	utr	chr8-89027248-89028377	34743
Lmx1b	chr2-33665266-33665766	3.20638e-07	-0.375329	0.105	0.132	0.12031	ENSMUST00000041730	ENSMUSG00000038765	protein_coding	exon	chr2-33640442-33640511	24754
Rab44	chr17-29136181-29136681	3.21149e-07	-0.341473	0.124	0.149	0.120502	ENSMUST00000087942	ENSMUSG00000064147	protein_coding	cds	chr17-29136282-29136362	0
Rtn4rl2	chr2-84868406-84868906	3.21651e-07	1.19899	0.02	0.008	0.12069	ENSMUST00000151799	ENSMUSG00000050896	protein_coding	utr	chr2-84871924-84871945	3017
1010001N08Rik	chr18-10957601-10958101	3.24011e-07	-0.742025	0.027	0.042	0.121575	ENSMUST00000180789	ENSMUSG00000097222	lincRNA	exon	chr18-11049087-11050821	90985
Tmem229a	chr6-25087135-25087635	3.34293e-07	-0.236754	0.237	0.271	0.125434	ENSMUST00000127247	ENSMUSG00000048022	protein_coding	exon	chr6-24951141-24956297	130837
Fam102b	chr3-108997270-108997770	3.34626e-07	-0.551606	0.05	0.071	0.125558	ENSMUST00000171143	ENSMUSG00000040339	protein_coding	gap	chr3-108997065-109003299	0
Lgr6	chr1-135043800-135044300	3.34703e-07	-0.535374	0.053	0.074	0.125587	ENSMUST00000044828	ENSMUSG00000042793	protein_coding	gap	chr1-135027268-135063620	0
Gm6133	chr18-78322635-78323135	3.37825e-07	0.48421	0.098	0.068	0.126759	ENSMUST00000164064	ENSMUSG00000090451	protein_coding	exon	chr18-78349754-78350701	26618
Gm29266	chr14-60533635-60534135	3.37969e-07	-0.490542	0.065	0.086	0.126813	ENSMUST00000190392	ENSMUSG00000101797	lincRNA	gap	chr14-60506751-60598932	0
Dpf1	chr7-29316919-29317419	3.41e-07	0.428106	0.117	0.085	0.12795	ENSMUST00000108231	ENSMUSG00000030584	protein_coding	utr	chr7-29316552-29317264	0
Tex29	chr8-11913555-11914055	3.43952e-07	-0.258	0.209	0.241	0.129058	ENSMUST00000033909	ENSMUSG00000031512	protein_coding	utr	chr8-11855706-11855761	57793
Mapk14	chr17-28691037-28691537	3.47775e-07	-0.148701	0.417	0.453	0.130492	ENSMUST00000124886	ENSMUSG00000053436	protein_coding	utr	chr17-28691440-28691573	0
Hnrnpll	chr17-79994860-79995360	3.57827e-07	-0.44591	0.074	0.097	0.134264	ENSMUST00000184635	ENSMUSG00000024095	protein_coding	utr	chr17-80029487-80030484	34126
Cyb561	chr11-105936146-105936646	3.67183e-07	-0.390849	0.093	0.122	0.137774	ENSMUST00000184269	ENSMUSG00000019590	protein_coding	cds	chr11-105936555-105936653	0
Afap1l2	chr19-56977552-56978052	3.70388e-07	0.474028	0.097	0.07	0.138977	ENSMUST00000148049	ENSMUSG00000025083	protein_coding	gap	chr19-56950267-56989043	0
Ptchd2	chr4-148287902-148288402	3.78202e-07	-0.163565	0.395	0.417	0.141909	ENSMUST00000047720	ENSMUSG00000041544	protein_coding	utr	chr4-148287723-148287965	0
Irak2	chr6-113668519-113669019	3.79309e-07	-0.338345	0.127	0.156	0.142324	ENSMUST00000155554	ENSMUSG00000060477	protein_coding	utr	chr6-113668850-113669095	0
Mras	chr9-99401289-99401789	3.79783e-07	-0.216572	0.272	0.306	0.142502	ENSMUST00000123771	ENSMUSG00000032470	protein_coding	gap	chr9-99394623-99411392	0
Mad2l1	chr6-66361082-66361582	3.83254e-07	-0.846284	0.02	0.033	0.143805	ENSMUST00000116605	ENSMUSG00000029910	protein_coding	exon	chr6-66535390-66535599	173807
Gad1-ps	chr10-99599297-99599797	3.83288e-07	1.34955	0.016	0.006	0.143817	ENSMUST00000167243	ENSMUSG00000090665	protein_coding	utr	chr10-99445819-99447007	152289
Spon1	chr7-113792002-113792502	4.02314e-07	-0.311753	0.146	0.179	0.150956	ENSMUST00000084696	ENSMUSG00000038156	protein_coding	gap	chr7-113788553-113836822	0
Unc80	chr1-66638166-66638666	4.03963e-07	0.828778	0.037	0.02	0.151575	ENSMUST00000061620	ENSMUSG00000055567	protein_coding	gap	chr1-66638098-66639245	0
Clpb	chr7-101695373-101695873	4.09048e-07	-0.449543	0.072	0.096	0.153483	ENSMUST00000153473	ENSMUSG00000001829	protein_coding	gap	chr7-101687375-101706482	0
Mink1	chr11-70586952-70587452	4.34605e-07	-0.499279	0.059	0.081	0.163073	ENSMUST00000102559	ENSMUSG00000020827	protein_coding	gap	chr11-70563127-70597167	0
Daam1	chr12-71957502-71958002	4.55435e-07	-0.297941	0.161	0.185	0.170888	ENSMUST00000085299	ENSMUSG00000034574	protein_coding	gap	chr12-71952560-71958746	0
Rbm20	chr19-53708297-53708797	4.82307e-07	-0.552515	0.048	0.07	0.180971	ENSMUST00000164202	ENSMUSG00000043639	protein_coding	gap	chr19-53677593-53813247	0
Fstl3	chr10-79780095-79780595	4.82399e-07	0.252699	0.264	0.224	0.181006	ENSMUST00000020575	ENSMUSG00000020325	protein_coding	cds	chr10-79779965-79780180	0
Ciapin1	chr8-94832462-94832962	4.85237e-07	-0.390953	0.099	0.126	0.182071	ENSMUST00000162538	ENSMUSG00000031781	protein_coding	cds	chr8-94832515-94832671	0
Osmr	chr15-6988088-6988588	5.0006e-07	-0.16826	0.372	0.405	0.187633	ENSMUST00000022746	ENSMUSG00000022146	protein_coding	exon	chr15-6874201-6874969	113118
Rhcg	chr7-79590687-79591187	5.00898e-07	0.625775	0.06	0.039	0.187947	ENSMUST00000032766	ENSMUSG00000030549	protein_coding	utr	chr7-79593363-79593800	2175
Dpf1	chr7-29317506-29318006	5.01987e-07	0.726464	0.048	0.029	0.188356	ENSMUST00000049977	ENSMUSG00000030584	protein_coding	utr	chr7-29316552-29317588	0
Tgds	chr14-118132563-118133063	5.13523e-07	-0.245552	0.207	0.244	0.192684	ENSMUST00000022727	ENSMUSG00000022130	protein_coding	cds	chr14-118132644-118132729	0
Lin52	chr12-84532095-84532595	5.13622e-07	-0.145995	0.452	0.489	0.192721	ENSMUST00000137170	ENSMUSG00000085793	protein_coding	utr	chr12-84529746-84531533	561
Galnt18	chr7-111741482-111741982	5.17892e-07	-0.497544	0.059	0.082	0.194323	ENSMUST00000106663	ENSMUSG00000038296	protein_coding	gap	chr7-111616485-111779312	0
9230104L09Rik	chr2-148861391-148861891	5.25697e-07	-0.16724	0.401	0.429	0.197252	ENSMUST00000149457	ENSMUSG00000027446	protein_coding	gap	chr2-148859602-148864959	0
Nop14	chr5-34660022-34660522	5.41118e-07	-0.11447	0.533	0.571	0.203038	ENSMUST00000041364	ENSMUSG00000036693	protein_coding	cds	chr5-34659851-34660045	0
Gm26551	chr11-51915926-51916426	5.41897e-07	0.392818	0.131	0.101	0.20333	ENSMUST00000181262	ENSMUSG00000097219	lincRNA	exon	chr11-51949882-51949916	33455
Fam21	chr6-116211732-116212232	5.45828e-07	-0.248658	0.206	0.241	0.204806	ENSMUST00000036759	ENSMUSG00000024104	protein_coding	gap	chr6-116209119-116213947	0
Ankrd33b	chr15-31299472-31299972	5.52562e-07	-0.312407	0.14	0.167	0.207332	ENSMUST00000156679	ENSMUSG00000022237	protein_coding	gap	chr15-31297985-31304991	0
Dio2	chr12-90733692-90734192	5.57401e-07	-0.196611	0.31	0.342	0.209148	ENSMUST00000082432	ENSMUSG00000007682	protein_coding	gap	chr12-90729991-90738062	0
Cd4	chr6-124882026-124882526	5.62867e-07	-0.316477	0.141	0.167	0.211199	ENSMUST00000151594	ENSMUSG00000023274	protein_coding	gap	chr6-124879694-124888079	0
4933407K13Rik	chrX-75728502-75729002	5.75677e-07	-0.521067	0.054	0.075	0.216005	ENSMUST00000138943	ENSMUSG00000087396	processed_transcript	gap	chrX-75727519-75731019	0
Midn	chr10-80152119-80152619	5.76829e-07	-0.232321	0.229	0.259	0.216438	ENSMUST00000153477	ENSMUSG00000035621	protein_coding	gap	chr10-80151724-80153590	0
Slc35e4	chr11-3913654-3914154	5.79255e-07	-0.181927	0.328	0.352	0.217348	ENSMUST00000109995	ENSMUSG00000048807	protein_coding	utr	chr11-3913188-3914664	0
Fam3c	chr6-22506807-22507307	5.79748e-07	-0.871487	0.017	0.031	0.217533	ENSMUST00000081288	ENSMUSG00000029672	protein_coding	exon	chr6-22355995-22356243	150563
2700062C07Rik	chr18-24420066-24420566	5.91626e-07	-0.448291	0.071	0.098	0.22199	ENSMUST00000097646	ENSMUSG00000024273	protein_coding	exon	chr18-24470861-24470980	50294
Abhd17b	chr19-21714842-21715342	5.92702e-07	-0.842116	0.02	0.032	0.222394	ENSMUST00000052556	ENSMUSG00000047368	protein_coding	utr	chr19-21684318-21685637	29204
Rarres1	chr3-67492338-67492838	5.99128e-07	-0.243596	0.22	0.257	0.224805	ENSMUST00000054825	ENSMUSG00000049404	protein_coding	gap	chr3-67491105-67495745	0
Tmpo	chr10-91180963-91181463	6.07549e-07	0.38286	0.14	0.114	0.227964	ENSMUST00000020123	ENSMUSG00000019961	protein_coding	exon	chr10-91171038-91171582	9380
Rhcg	chr7-79578858-79579358	6.13964e-07	0.393677	0.127	0.099	0.230372	ENSMUST00000032766	ENSMUSG00000030549	protein_coding	utr	chr7-79593363-79593800	14004
Adcy2	chr13-69037174-69037674	6.1554e-07	-0.203997	0.296	0.328	0.230963	ENSMUST00000022013	ENSMUSG00000021536	protein_coding	exon	chr13-68999074-68999541	37632
Lrig1	chr6-94755399-94755899	6.23498e-07	0.612673	0.065	0.041	0.233949	ENSMUST00000032105	ENSMUSG00000030029	protein_coding	exon	chr6-94699462-94700158	55240
Cnih3	chr1-181446606-181447106	6.38832e-07	0.796638	0.039	0.022	0.239702	ENSMUST00000162685	ENSMUSG00000026514	protein_coding	gap	chr1-181409677-181449969	0
Tmem130	chr5-144724905-144725405	6.57236e-07	0.29833	0.197	0.166	0.246608	ENSMUST00000061446	ENSMUSG00000043388	protein_coding	utr	chr5-144735915-144737342	10509
Fxn	chr19-24259861-24260361	6.60829e-07	-0.356553	0.113	0.137	0.247956	ENSMUST00000081333	ENSMUSG00000059363	protein_coding	utr	chr19-24261453-24261902	1091
Cadm1	chr9-47579504-47580004	6.65406e-07	-0.319126	0.13	0.158	0.249674	ENSMUST00000152459	ENSMUSG00000032076	protein_coding	gap	chr9-47530506-47787970	0
Gm21726	chr13-90394818-90395318	6.68638e-07	-0.272636	0.177	0.214	0.250886	ENSMUST00000179654	ENSMUSG00000094277	protein_coding	exon	chr13-90583400-90583765	188081
1700081H04Rik	chr5-119055387-119055887	6.81853e-07	1.45959	0.014	0.006	0.255845	ENSMUST00000190550	ENSMUSG00000100573	lincRNA	exon	chr5-119108234-119108715	52346
Kcnk1	chr8-125996406-125996906	6.85952e-07	-0.305947	0.148	0.174	0.257383	ENSMUST00000046765	ENSMUSG00000033998	protein_coding	gap	chr8-125995815-126025011	0
Dlg5	chr14-24226316-24226816	6.88278e-07	-0.184355	0.321	0.358	0.258256	ENSMUST00000169880	ENSMUSG00000021782	protein_coding	gap	chr14-24202367-24244811	0
Tprg	chr16-25529612-25530112	6.93368e-07	-0.235431	0.228	0.263	0.260166	ENSMUST00000056087	ENSMUSG00000048399	protein_coding	utr	chr16-25422316-25422344	107267
Tbc1d8	chr1-39417751-39418251	6.97937e-07	-0.664323	0.032	0.049	0.26188	ENSMUST00000193823	ENSMUSG00000003134	protein_coding	gap	chr1-39406871-39426067	0
Hcn2	chr10-79728239-79728739	6.99415e-07	-0.86839	0.017	0.031	0.262434	ENSMUST00000099513	ENSMUSG00000020331	protein_coding	gap	chr10-79726309-79728892	0
Tead4	chr6-128275449-128275949	7.02898e-07	-0.46592	0.065	0.086	0.263741	ENSMUST00000130454	ENSMUSG00000030353	protein_coding	utr	chr6-128275452-128275577	0
2610203C20Rik	chr9-41700568-41701068	7.16229e-07	-0.780003	0.024	0.036	0.268743	ENSMUST00000180535	ENSMUSG00000074415	processed_transcript	exon	chr9-41614237-41617772	82795
Cfap20	chr8-95420717-95421217	7.28748e-07	-0.424552	0.077	0.104	0.273441	ENSMUST00000034249	ENSMUSG00000031796	protein_coding	cds	chr8-95421136-95421246	0
Ear14	chr14-51199990-51200490	7.34564e-07	-0.393781	0.096	0.122	0.275623	ENSMUST00000049559	ENSMUSG00000050766	protein_coding	exon	chr14-51203689-51204156	3198
Nmur2	chr11-55958285-55958785	7.4563e-07	-0.235321	0.215	0.253	0.279775	ENSMUST00000037682	ENSMUSG00000037393	protein_coding	utr	chr11-56024987-56026973	66201
Alpk2	chr18-65273445-65273945	7.52295e-07	0.447102	0.101	0.073	0.282276	ENSMUST00000035548	ENSMUSG00000032845	protein_coding	gap	chr18-65266291-65276645	0
Kirrel3	chr9-34995803-34996303	7.58649e-07	-0.185411	0.324	0.36	0.28466	ENSMUST00000190549	ENSMUSG00000032036	protein_coding	gap	chr9-34991093-35000854	0
Htra1	chr7-130953394-130953894	7.63761e-07	-0.204074	0.282	0.316	0.286578	ENSMUST00000153290	ENSMUSG00000006205	protein_coding	gap	chr7-130943595-130961512	0
Foxn3	chr12-99454371-99454871	7.70758e-07	-0.548092	0.048	0.067	0.289204	ENSMUST00000176928	ENSMUSG00000033713	protein_coding	exon	chr12-99450025-99450111	4259
Gm26578	chr8-31975708-31976208	8.17948e-07	-0.81763	0.02	0.033	0.30691	ENSMUST00000181702	ENSMUSG00000097928	lincRNA	exon	chr8-32008504-32012568	32295
Adcy2	chr13-68961540-68962040	8.21652e-07	0.451299	0.099	0.074	0.3083	ENSMUST00000022013	ENSMUSG00000021536	protein_coding	gap	chr13-68888121-68982346	0
Zfhx3	chr8-108717452-108717952	8.33308e-07	-0.824157	0.02	0.033	0.312674	ENSMUST00000188994	ENSMUSG00000038872	protein_coding	gap	chr8-108704236-108800194	0
Gabbr2	chr4-46894120-46894620	8.33706e-07	-0.360819	0.109	0.134	0.312823	ENSMUST00000107749	ENSMUSG00000039809	protein_coding	gap	chr4-46875803-46991107	0
A330033J07Rik	chr13-48126552-48127052	8.72766e-07	-0.163171	0.378	0.402	0.327479	ENSMUST00000180921	ENSMUSG00000097622	lincRNA	gap	chr13-48046609-48261919	0
Slc1a2	chr2-102658186-102658686	8.87809e-07	-0.167144	0.382	0.406	0.333124	ENSMUST00000080210	ENSMUSG00000005089	protein_coding	utr	chr2-102658659-102659284	0
Rhob	chr12-8445473-8445973	8.98568e-07	-0.384604	0.094	0.118	0.337161	ENSMUST00000067384	ENSMUSG00000054364	protein_coding	utr	chr12-8497763-8499041	51789
Slc1a2	chr2-102718382-102718882	9.19774e-07	-0.657138	0.036	0.049	0.345118	ENSMUST00000145921	ENSMUSG00000005089	protein_coding	gap	chr2-102702481-102735943	0
Agtpbp1	chr13-59467583-59468083	9.37505e-07	-0.277079	0.169	0.198	0.351771	ENSMUST00000170555	ENSMUSG00000021557	protein_coding	gap	chr13-59466117-59473687	0
Gm4491	chr14-57115786-57116286	9.44841e-07	-0.143729	0.435	0.469	0.354523	ENSMUST00000159455	ENSMUSG00000089840	protein_coding	utr	chr14-57115790-57115883	0
Gm10062	chr5-25604585-25605085	9.57548e-07	-0.416238	0.077	0.102	0.359291	ENSMUST00000181398	ENSMUSG00000059244	lincRNA	exon	chr5-25659809-25661275	54723
Cdh2	chr18-16739696-16740196	9.71516e-07	-0.383101	0.095	0.118	0.364532	ENSMUST00000025166	ENSMUSG00000024304	protein_coding	gap	chr18-16650499-16774507	0
Gabarapl1	chr6-129543554-129544054	1.03093e-06	-0.326824	0.132	0.156	0.386827	ENSMUST00000032264	ENSMUSG00000030161	protein_coding	utr	chr6-129541168-129542331	1222
Lpin1	chr12-16354621-16355121	1.04986e-06	-0.949262	0.014	0.025	0.393927	ENSMUST00000111067	ENSMUSG00000020593	protein_coding	utr	chr12-16535669-16538412	180547
Gm29137	chr3-21672424-21672924	1.07648e-06	0.246607	0.255	0.22	0.403916	ENSMUST00000190301	ENSMUSG00000101897	lincRNA	exon	chr3-21268952-21269090	403333
Prex1	chr2-166692083-166692583	1.08641e-06	-0.180782	0.318	0.353	0.407644	ENSMUST00000152238	ENSMUSG00000039621	protein_coding	gap	chr2-166647046-166703472	0
D430001F17Rik	chr16-91962479-91962979	1.09063e-06	0.628169	0.054	0.036	0.409225	ENSMUST00000141344	ENSMUSG00000087190	processed_transcript	exon	chr16-91961886-91962915	0
Acat3	chr17-12940120-12940620	1.11992e-06	0.371978	0.135	0.104	0.420218	ENSMUST00000160378	ENSMUSG00000062480	protein_coding	cds	chr17-12940246-12940300	0
Gm12829	chr4-114728529-114729029	1.13102e-06	-0.286331	0.159	0.189	0.42438	ENSMUST00000146346	ENSMUSG00000085870	lincRNA	exon	chr4-114685273-114687595	40933
Aco1	chr4-40048110-40048610	1.14947e-06	-0.356502	0.109	0.132	0.431304	ENSMUST00000102973	ENSMUSG00000028405	protein_coding	exon	chr4-40143081-40143541	94470
Rgs6	chr12-82855710-82856210	1.15606e-06	-0.175636	0.328	0.37	0.433777	ENSMUST00000191352	ENSMUSG00000021219	protein_coding	gap	chr12-82651913-82985294	0
Acot7	chr4-152221293-152221793	1.17633e-06	0.592122	0.063	0.043	0.441381	ENSMUST00000167926	ENSMUSG00000028937	protein_coding	gap	chr4-152217893-152223070	0
Lyrm4	chr13-35994056-35994556	1.19187e-06	-0.234419	0.223	0.257	0.447212	ENSMUST00000053265	ENSMUSG00000046573	protein_coding	gap	chr13-35979908-36092805	0
Mir22hg	chr11-75458653-75459153	1.19628e-06	-0.433662	0.074	0.098	0.448868	ENSMUST00000149940	ENSMUSG00000085148	processed_transcript	exon	chr11-75461539-75461755	2385
D5Ertd579e	chr5-36705307-36705807	1.20788e-06	-0.466488	0.062	0.086	0.45322	ENSMUST00000140653	ENSMUSG00000029190	protein_coding	exon	chr5-36695855-36696024	9282
Firre	chrX-50620826-50621326	1.23994e-06	-0.897234	0.016	0.029	0.465252	ENSMUST00000148530	ENSMUSG00000085396	processed_transcript	gap	chrX-50620805-50626436	0
Kcnq3	chr15-66182934-66183434	1.24095e-06	-0.38213	0.093	0.116	0.465629	ENSMUST00000070256	ENSMUSG00000056258	protein_coding	gap	chr15-66031471-66285835	0
Sdc4	chr2-164438967-164439467	1.30891e-06	-0.182273	0.323	0.354	0.491129	ENSMUST00000142909	ENSMUSG00000017009	protein_coding	gap	chr2-164431314-164443798	0
Adcy2	chr13-69068759-69069259	1.36234e-06	-0.300244	0.141	0.171	0.511176	ENSMUST00000022013	ENSMUSG00000021536	protein_coding	exon	chr13-68999074-68999541	69217
Zhx3	chr2-160872802-160873302	1.36539e-06	-0.164088	0.361	0.39	0.512321	ENSMUST00000176141	ENSMUSG00000035877	protein_coding	utr	chr2-160872791-160872829	0
Plekhg1	chr10-3715223-3715723	1.3974e-06	-0.286681	0.161	0.188	0.524331	ENSMUST00000120274	ENSMUSG00000040624	protein_coding	exon	chr10-3740364-3740540	24640
Gas7	chr11-67519041-67519541	1.40478e-06	-0.393385	0.088	0.109	0.527103	ENSMUST00000136796	ENSMUSG00000033066	protein_coding	gap	chr11-67455775-67603107	0
Efcab11	chr12-99743540-99744040	1.41124e-06	-0.261489	0.181	0.218	0.529526	ENSMUST00000046485	ENSMUSG00000021176	protein_coding	gap	chr12-99719104-99854609	0
Tprg	chr16-25532772-25533272	1.43154e-06	-0.187853	0.312	0.344	0.537143	ENSMUST00000056087	ENSMUSG00000048399	protein_coding	utr	chr16-25422316-25422344	110427
Gxylt1	chr15-93129587-93130087	1.44527e-06	-0.482917	0.058	0.079	0.542295	ENSMUST00000049484	ENSMUSG00000036197	protein_coding	utr	chr15-93239742-93245129	109654
Gm5148	chr3-37896927-37897427	1.44601e-06	-0.298921	0.148	0.175	0.542571	ENSMUST00000099128	ENSMUSG00000058174	protein_coding	exon	chr3-37724203-37724490	172436
Arhgef26	chr3-62349130-62349630	1.45444e-06	-0.42552	0.077	0.097	0.545733	ENSMUST00000163008	ENSMUSG00000036885	protein_coding	gap	chr3-62345292-62377587	0
Atad2b	chr12-4992487-4992987	1.45583e-06	-0.276268	0.164	0.199	0.546256	ENSMUST00000045664	ENSMUSG00000052812	protein_coding	gap	chr12-4991059-5006605	0
Gm12714	chr11-59899767-59900267	1.46106e-06	-0.755434	0.024	0.039	0.54822	ENSMUST00000143391	ENSMUSG00000084766	lincRNA	gap	chr11-59898676-59903559	0
Pde4d	chr13-109752406-109752906	1.53504e-06	-0.281347	0.169	0.201	0.575978	ENSMUST00000177907	ENSMUSG00000021699	protein_coding	gap	chr13-109740579-109757576	0
Arhgef28	chr13-98030200-98030700	1.53528e-06	-0.655758	0.032	0.048	0.576066	ENSMUST00000109426	ENSMUSG00000021662	protein_coding	gap	chr13-98029932-98043799	0
Auts2	chr5-131677478-131677978	1.54637e-06	-0.286463	0.153	0.182	0.580229	ENSMUST00000182974	ENSMUSG00000029673	protein_coding	gap	chr5-131533873-131770759	0
Nr3c1	chr18-39624244-39624744	1.55243e-06	-0.371124	0.095	0.12	0.582504	ENSMUST00000124115	ENSMUSG00000024431	protein_coding	exon	chr18-39491072-39491301	132942
Paqr8	chr1-20908518-20909018	1.57221e-06	-0.176781	0.33	0.362	0.589923	ENSMUST00000189400	ENSMUSG00000025931	protein_coding	gap	chr1-20890687-20932059	0
Sema7a	chr9-57952036-57952536	1.60537e-06	-0.390377	0.09	0.112	0.602369	ENSMUST00000043059	ENSMUSG00000038264	protein_coding	gap	chr9-57940329-57953535	0
Dnah2	chr11-69417885-69418385	1.61082e-06	-0.265079	0.18	0.202	0.604412	ENSMUST00000108659	ENSMUSG00000005237	protein_coding	utr	chr11-69420809-69420992	2423
Gm14483	chrX-11158311-11158811	1.61441e-06	-0.213613	0.254	0.284	0.605761	ENSMUST00000188439	ENSMUSG00000100626	protein_coding	exon	chrX-11299257-11299757	140445
Rhcg	chr7-79590143-79590643	1.63345e-06	0.546864	0.072	0.047	0.612904	ENSMUST00000032766	ENSMUSG00000030549	protein_coding	utr	chr7-79593363-79593800	2719
Sqle	chr15-59314726-59315226	1.64908e-06	-0.109909	0.534	0.569	0.618769	ENSMUST00000100640	ENSMUSG00000022351	protein_coding	utr	chr15-59315107-59315844	0
Dio2	chr12-90607966-90608466	1.6941e-06	-0.176018	0.332	0.367	0.635658	ENSMUST00000082432	ENSMUSG00000007682	protein_coding	utr	chr12-90724554-90729411	116087
Ccnl1	chr3-65905770-65906270	1.71571e-06	-0.251366	0.201	0.227	0.643769	ENSMUST00000154585	ENSMUSG00000027829	protein_coding	utr	chr3-65946151-65946948	39880
Phf2	chr13-48870863-48871363	1.81319e-06	-0.293419	0.143	0.169	0.680346	ENSMUST00000035540	ENSMUSG00000038025	protein_coding	utr	chr13-48870766-48870885	0
1110054M08Rik	chr16-24339630-24340130	1.82378e-06	-0.306949	0.134	0.164	0.684319	ENSMUST00000181640	ENSMUSG00000097867	lincRNA	exon	chr16-24391612-24393107	51481
Gm27007	chr13-44306274-44306774	1.84566e-06	-0.252785	0.187	0.221	0.692528	ENSMUST00000183264	ENSMUSG00000098107	lincRNA	exon	chr13-44400436-44400511	93661
Lrrfip1	chr1-91037973-91038473	1.8476e-06	0.647663	0.047	0.03	0.693257	ENSMUST00000189505	ENSMUSG00000026305	protein_coding	gap	chr1-90998894-91068562	0
Dzip1l	chr9-99667596-99668096	1.85959e-06	-0.312592	0.134	0.161	0.697755	ENSMUST00000112886	ENSMUSG00000037784	protein_coding	cds	chr9-99667639-99667803	0
Slc7a11	chr3-50381469-50381969	1.89296e-06	0.417678	0.106	0.079	0.710275	ENSMUST00000194462	ENSMUSG00000027737	protein_coding	cds	chr3-50381875-50381978	0
Hnrnpll	chr17-80002347-80002847	1.94595e-06	-0.534158	0.047	0.065	0.730158	ENSMUST00000184635	ENSMUSG00000024095	protein_coding	utr	chr17-80029487-80030484	26639
Vwa5b1	chr4-138524657-138525157	1.95483e-06	-0.382368	0.09	0.113	0.733493	ENSMUST00000030533	ENSMUSG00000028753	protein_coding	utr	chr4-138565360-138569066	40202
Mgat5	chr1-127160291-127160791	1.96699e-06	-0.171455	0.359	0.387	0.738053	ENSMUST00000189427	ENSMUSG00000036155	protein_coding	exon	chr1-127205015-127205427	44223
Prdm16	chr4-154570526-154571026	2.00002e-06	-0.236143	0.207	0.24	0.750448	ENSMUST00000149605	ENSMUSG00000039410	protein_coding	gap	chr4-154528932-154636722	0
Eea1	chr10-96079108-96079608	2.00028e-06	0.424003	0.104	0.081	0.750545	ENSMUST00000053484	ENSMUSG00000036499	protein_coding	utr	chr10-96042205-96045518	33589
1700019G17Rik	chr6-85895204-85895704	2.03824e-06	0.645031	0.049	0.03	0.764789	ENSMUST00000159755	ENSMUSG00000068299	protein_coding	utr	chr6-85899051-85899207	3346
Ralbp1	chr17-65871493-65871993	2.04445e-06	-0.249554	0.193	0.224	0.767117	ENSMUST00000166543	ENSMUSG00000024096	protein_coding	gap	chr17-65867831-65885185	0
Tnr	chr1-159681176-159681676	2.04935e-06	-0.450081	0.063	0.088	0.768957	ENSMUST00000195199	ENSMUSG00000015829	protein_coding	gap	chr1-159524216-159737510	0
Gm21954	chr3-55461640-55462140	2.11061e-06	-0.162416	0.354	0.391	0.791944	ENSMUST00000179544	ENSMUSG00000094962	protein_coding	cds	chr3-55461985-55462011	0
Kcnv1	chr15-45470028-45470528	2.17437e-06	0.753284	0.038	0.024	0.815867	ENSMUST00000022967	ENSMUSG00000022342	protein_coding	exon	chr15-45114171-45114934	355093
Rec114	chr9-58687280-58687780	2.26731e-06	-0.468077	0.061	0.081	0.850741	ENSMUST00000186960	ENSMUSG00000074269	protein_coding	gap	chr9-58665917-58712015	0
Adamts20	chr15-94428666-94429166	2.30617e-06	-0.266018	0.173	0.202	0.865322	ENSMUST00000128797	ENSMUSG00000022449	protein_coding	gap	chr15-94418240-94465305	0
Zmiz1	chr14-25636162-25636662	2.32602e-06	-0.206163	0.26	0.292	0.87277	ENSMUST00000162645	ENSMUSG00000007817	protein_coding	gap	chr14-25636018-25643557	0
Atf6	chr1-170695319-170695819	2.42992e-06	-0.408886	0.084	0.103	0.911754	ENSMUST00000027974	ENSMUSG00000026663	protein_coding	utr	chr1-170704674-170709878	8854
Rhoj	chr12-75379010-75379510	2.45622e-06	0.641396	0.047	0.03	0.921623	ENSMUST00000172981	ENSMUSG00000046768	protein_coding	gap	chr12-75309002-75391678	0
Fndc5	chr4-129142087-129142587	2.46434e-06	-0.41363	0.077	0.099	0.924669	ENSMUST00000102600	ENSMUSG00000001334	protein_coding	cds	chr4-129142535-129142540	0
Gm13838	chr5-116309239-116309739	2.47379e-06	0.408415	0.108	0.083	0.928215	ENSMUST00000132130	ENSMUSG00000084921	lincRNA	gap	chr5-116306192-116309339	0
2310014F06Rik	chr7-112644305-112644805	2.48697e-06	-0.347662	0.109	0.137	0.933161	ENSMUST00000146145	ENSMUSG00000085945	processed_transcript	gap	chr7-112618668-112677848	0
Dst	chr1-34060288-34060788	2.49522e-06	0.545389	0.066	0.044	0.936256	ENSMUST00000194011	ENSMUSG00000026131	protein_coding	gap	chr1-34006399-34086241	0
Tnrc6a	chr7-123124795-123125295	2.51432e-06	0.487683	0.079	0.057	0.943422	ENSMUST00000094053	ENSMUSG00000052707	protein_coding	gap	chr7-123124716-123143749	0
Ccdc13	chr9-121794873-121795373	2.54751e-06	-0.442069	0.07	0.085	0.955877	ENSMUST00000135986	ENSMUSG00000079235	protein_coding	utr	chr9-121797627-121798079	2253
Pdlim5	chr3-142345667-142346167	2.5852e-06	0.916015	0.027	0.014	0.970019	ENSMUST00000170361	ENSMUSG00000028273	protein_coding	gap	chr3-142314449-142352733	0
n-R5s96	chr8-47764449-47764949	2.6025e-06	-0.28331	0.157	0.184	0.976509	ENSMUST00000082574	ENSMUSG00000064508	rRNA	exon	chr8-47719246-47719369	45079
Tox	chr4-6893123-6893623	2.6294e-06	-0.426494	0.07	0.097	0.986603	ENSMUST00000150082	ENSMUSG00000041272	protein_coding	gap	chr4-6842427-6990389	0
Ankrd54	chr15-79051694-79052194	2.63544e-06	-0.255964	0.185	0.216	0.98887	ENSMUST00000040676	ENSMUSG00000033055	protein_coding	utr	chr15-79053094-79054009	899
Naaa	chr5-92263981-92264481	2.63549e-06	-0.149621	0.396	0.423	0.98889	ENSMUST00000175656	ENSMUSG00000029413	protein_coding	gap	chr5-92263764-92265080	0
Kirrel3	chr9-34815795-34816295	2.64176e-06	-0.524292	0.046	0.065	0.991243	ENSMUST00000190549	ENSMUSG00000032036	protein_coding	gap	chr9-34489159-34911783	0
Myof	chr19-37988065-37988565	2.65133e-06	1.61781	0.011	0.004	0.994833	ENSMUST00000172095	ENSMUSG00000048612	protein_coding	gap	chr19-37986816-37995421	0
Itpk1	chr12-102678773-102679273	2.65861e-06	-0.390455	0.082	0.109	0.997564	ENSMUST00000179210	ENSMUSG00000057963	protein_coding	gap	chr12-102675468-102695710	0
0610007P14Rik	chr12-85818438-85818938	0.232748	0.133367	0.066	0.059	1	ENSMUST00000131681	ENSMUSG00000021252	protein_coding	gap	chr12-85816435-85824470	0
0610009E02Rik	chr2-26449365-26449865	0.147761	-0.17025	0.041	0.046	1	ENSMUST00000151521	ENSMUSG00000086714	processed_transcript	gap	chr2-26446201-26457672	0
0610009O20Rik	chr18-38255652-38256152	0.000248578	-0.178731	0.219	0.243	1	ENSMUST00000025314	ENSMUSG00000024442	protein_coding	gap	chr18-38254567-38257257	0
0610010F05Rik	chr11-23565808-23566308	0.0282768	0.314039	0.04	0.032	1	ENSMUST00000155903	ENSMUSG00000042208	protein_coding	cds	chr11-23566174-23566195	0
0610010K14Rik	chr11-70237641-70238141	8.62883e-05	0.135936	0.424	0.387	1	ENSMUST00000108579	ENSMUSG00000020831	protein_coding	cds	chr11-70237784-70237804	0
0610037L13Rik	chr4-107892585-107893085	0.456959	0.150655	0.02	0.018	1	ENSMUST00000153593	ENSMUSG00000028608	protein_coding	gap	chr4-107892254-107893333	0
0610040J01Rik	chr5-63821116-63821616	0.561558	0.134343	0.017	0.015	1	ENSMUST00000081747	ENSMUSG00000060512	protein_coding	gap	chr5-63812596-63876449	0
0610040J01Rik	chr5-63834209-63834709	0.0776224	0.381945	0.019	0.015	1	ENSMUST00000081747	ENSMUSG00000060512	protein_coding	gap	chr5-63812596-63876449	0
0610040J01Rik	chr5-63867426-63867926	0.193595	-0.297169	0.013	0.015	1	ENSMUST00000081747	ENSMUSG00000060512	protein_coding	gap	chr5-63812596-63876449	0
0610040J01Rik	chr5-63878856-63879356	0.0327548	0.588092	0.012	0.008	1	ENSMUST00000081747	ENSMUSG00000060512	protein_coding	gap	chr5-63876500-63896429	0
0610040J01Rik	chr5-63886520-63887020	0.11346	0.239864	0.036	0.03	1	ENSMUST00000081747	ENSMUSG00000060512	protein_coding	gap	chr5-63876500-63896429	0
0610040J01Rik	chr5-63887081-63887581	0.210854	0.349018	0.011	0.009	1	ENSMUST00000081747	ENSMUSG00000060512	protein_coding	gap	chr5-63876500-63896429	0
0610043K17Rik	chr4-101357876-101358376	0.543371	-0.122892	0.016	0.016	1	ENSMUST00000123107	ENSMUSG00000087361	lincRNA	gap	chr4-101353889-101366989	0
0610043K17Rik	chr4-101366332-101366832	0.207735	-0.186342	0.029	0.033	1	ENSMUST00000142581	ENSMUSG00000087361	lincRNA	gap	chr4-101366676-101366989	0
0610043K17Rik	chr4-101367215-101367715	0.0987245	-0.202182	0.039	0.046	1	ENSMUST00000142581	ENSMUSG00000087361	lincRNA	gap	chr4-101367140-101374257	0
0610043K17Rik	chr4-101384955-101385455	0.578959	-0.129942	0.01	0.012	1	ENSMUST00000142581	ENSMUSG00000087361	lincRNA	gap	chr4-101374324-101390942	0
0610043K17Rik	chr4-101392182-101392682	0.425785	0.161381	0.02	0.018	1	ENSMUST00000123107	ENSMUSG00000087361	lincRNA	gap	chr4-101374324-101398889	0
1010001N08Rik	chr18-10941769-10942269	0.178523	-0.374639	0.008	0.01	1	ENSMUST00000180789	ENSMUSG00000097222	lincRNA	exon	chr18-11049087-11050821	106817
1010001N08Rik	chr18-10980259-10980759	0.000779288	-0.306121	0.072	0.086	1	ENSMUST00000180789	ENSMUSG00000097222	lincRNA	exon	chr18-11049087-11050821	68327
1010001N08Rik	chr18-10983780-10984280	0.105622	-0.260214	0.024	0.028	1	ENSMUST00000180789	ENSMUSG00000097222	lincRNA	exon	chr18-11049087-11050821	64806
1110001J03Rik	chr6-38532994-38533494	0.0529312	0.160553	0.122	0.116	1	ENSMUST00000147651	ENSMUSG00000019689	protein_coding	exon	chr6-38533502-38533711	7
1110002E22Rik	chr3-138066364-138066864	0.043376	0.625947	0.01	0.006	1	ENSMUST00000163080	ENSMUSG00000090066	protein_coding	cds	chr3-138065052-138070412	0
1110002E22Rik	chr3-138067877-138068377	0.122417	-0.211482	0.033	0.038	1	ENSMUST00000163080	ENSMUSG00000090066	protein_coding	cds	chr3-138065052-138070412	0
1110002J07Rik	chr10-66814459-66814959	0.196914	0.227591	0.028	0.023	1	ENSMUST00000181710	ENSMUSG00000097134	lincRNA	exon	chr10-66912489-66913672	97529
1110002J07Rik	chr10-66864385-66864885	0.332582	-0.155014	0.024	0.026	1	ENSMUST00000181710	ENSMUSG00000097134	lincRNA	exon	chr10-66912489-66913672	47603
1110002J07Rik	chr10-66871122-66871622	0.318701	0.176243	0.027	0.024	1	ENSMUST00000181710	ENSMUSG00000097134	lincRNA	exon	chr10-66912489-66913672	40866
1110002J07Rik	chr10-66877068-66877568	0.00155766	-0.151268	0.218	0.244	1	ENSMUST00000181710	ENSMUSG00000097134	lincRNA	exon	chr10-66912489-66913672	34920
1110002J07Rik	chr10-66878883-66879383	0.000127432	-0.268981	0.117	0.14	1	ENSMUST00000181710	ENSMUSG00000097134	lincRNA	exon	chr10-66912489-66913672	33105
1110002J07Rik	chr10-66897012-66897512	0.339293	0.207962	0.018	0.017	1	ENSMUST00000181710	ENSMUSG00000097134	lincRNA	exon	chr10-66912489-66913672	14976
1110002J07Rik	chr10-66901857-66902357	0.0224268	-0.607145	0.008	0.013	1	ENSMUST00000181710	ENSMUSG00000097134	lincRNA	exon	chr10-66912489-66913672	10131
1110002J07Rik	chr10-66909140-66909640	0.134574	0.15286	0.08	0.07	1	ENSMUST00000181710	ENSMUSG00000097134	lincRNA	exon	chr10-66912489-66913672	2848
1110002J07Rik	chr10-66913624-66914124	0.0358219	-0.197166	0.068	0.077	1	ENSMUST00000181710	ENSMUSG00000097134	lincRNA	gap	chr10-66913673-66915855	0
1110002J07Rik	chr10-66919658-66920158	0.211999	0.316187	0.015	0.013	1	ENSMUST00000181710	ENSMUSG00000097134	lincRNA	gap	chr10-66918996-66919927	0
1110002L01Rik	chr12-3406564-3407064	0.095918	0.291079	0.028	0.022	1	ENSMUST00000179637	ENSMUSG00000071456	protein_coding	utr	chr12-3406706-3406711	0
1110002L01Rik	chr12-3425905-3426405	0.112218	0.207928	0.052	0.044	1	ENSMUST00000180149	ENSMUSG00000071456	protein_coding	gap	chr12-3407925-3426500	0
1110004E09Rik	chr16-90915957-90916457	0.213397	0.258306	0.02	0.017	1	ENSMUST00000023694	ENSMUSG00000022972	protein_coding	utr	chr16-90925809-90925971	9351
1110004E09Rik	chr16-90925424-90925924	0.234911	-0.130782	0.047	0.05	1	ENSMUST00000023694	ENSMUSG00000022972	protein_coding	utr	chr16-90925809-90925971	0
1110007C09Rik	chr13-49211386-49211886	0.0221724	0.339096	0.04	0.032	1	ENSMUST00000048946	ENSMUSG00000037960	protein_coding	gap	chr13-49208147-49215936	0
1110007C09Rik	chr13-49213529-49214029	0.358956	0.126466	0.05	0.045	1	ENSMUST00000048946	ENSMUSG00000037960	protein_coding	gap	chr13-49208147-49215936	0
1110007C09Rik	chr13-49214352-49214852	0.0668133	0.383368	0.022	0.017	1	ENSMUST00000048946	ENSMUSG00000037960	protein_coding	gap	chr13-49208147-49215936	0
1110007C09Rik	chr13-49215165-49215665	0.256521	0.13065	0.068	0.061	1	ENSMUST00000048946	ENSMUSG00000037960	protein_coding	gap	chr13-49208147-49215936	0
1110008E08Rik	chr16-90547974-90548474	0.113481	0.266382	0.03	0.027	1	ENSMUST00000060246	ENSMUSG00000046119	lincRNA	exon	chr16-90554164-90554884	5689
1110008E08Rik	chr16-90549489-90549989	0.48233	-0.170409	0.012	0.012	1	ENSMUST00000060246	ENSMUSG00000046119	lincRNA	exon	chr16-90554164-90554884	4174
1110008E08Rik	chr16-90550313-90550813	0.0540944	0.233621	0.06	0.052	1	ENSMUST00000060246	ENSMUSG00000046119	lincRNA	exon	chr16-90554164-90554884	3350
1110008E08Rik	chr16-90621874-90622374	0.582991	-0.100972	0.018	0.017	1	ENSMUST00000183621	ENSMUSG00000046119	lincRNA	exon	chr16-90554164-90554886	66987
1110008E08Rik	chr16-90624639-90625139	0.195202	0.325856	0.014	0.012	1	ENSMUST00000183621	ENSMUSG00000046119	lincRNA	exon	chr16-90554164-90554886	69752
1110008E08Rik	chr16-90626275-90626775	0.0699145	0.322499	0.026	0.022	1	ENSMUST00000183621	ENSMUSG00000046119	lincRNA	exon	chr16-90554164-90554886	71388
1110008E08Rik	chr16-90629867-90630367	0.283945	0.255957	0.015	0.012	1	ENSMUST00000183621	ENSMUSG00000046119	lincRNA	exon	chr16-90554164-90554886	74980
1110008F13Rik	chr2-156863756-156864256	0.198549	0.251478	0.024	0.019	1	ENSMUST00000152942	ENSMUSG00000027637	protein_coding	gap	chr2-156863418-156865256	0
1110008L16Rik	chr12-55307536-55308036	0.589201	0.126126	0.018	0.016	1	ENSMUST00000184980	ENSMUSG00000021023	protein_coding	gap	chr12-55306387-55308736	0
1110008L16Rik	chr12-55315165-55315665	0.117465	0.270675	0.028	0.023	1	ENSMUST00000184980	ENSMUSG00000021023	protein_coding	gap	chr12-55308870-55338159	0
1110008L16Rik	chr12-55362970-55363470	0.0458053	-0.23484	0.045	0.051	1	ENSMUST00000184980	ENSMUSG00000021023	protein_coding	gap	chr12-55338268-55377113	0
1110012L19Rik	chrX-70385074-70385574	0.0685277	0.184619	0.083	0.073	1	ENSMUST00000053981	ENSMUSG00000045237	protein_coding	exon	chrX-70385877-70386151	302
1110015O18Rik	chr3-4796707-4797207	0.0378699	0.602928	0.012	0.007	1	ENSMUST00000184429	ENSMUSG00000098659	lincRNA	exon	chr3-4797558-4797955	350
1110017D15Rik	chr4-41504303-41504803	0.00395614	0.478374	0.03	0.022	1	ENSMUST00000125303	ENSMUSG00000028441	protein_coding	utr	chr4-41505009-41505065	205
1110017D15Rik	chr4-41507527-41508027	0.143772	-0.358967	0.012	0.013	1	ENSMUST00000125303	ENSMUSG00000028441	protein_coding	cds	chr4-41507521-41507593	0
1110017D15Rik	chr4-41505201-41505701	0.332047	0.178474	0.024	0.021	1	ENSMUST00000125303	ENSMUSG00000028441	protein_coding	cds	chr4-41505568-41505654	0
1110018N20Rik	chr2-167190684-167191184	0.00675554	-0.85453	0.006	0.01	1	ENSMUST00000151217	ENSMUSG00000085151	processed_transcript	gap	chr2-167189407-167191291	0
1110018N20Rik	chr2-167188803-167189303	0.258492	0.138952	0.057	0.05	1	ENSMUST00000151217	ENSMUSG00000085151	processed_transcript	gap	chr2-167188819-167189277	0
1110018N20Rik	chr2-167189337-167189837	0.154373	0.194759	0.046	0.039	1	ENSMUST00000151217	ENSMUSG00000085151	processed_transcript	gap	chr2-167189407-167191291	0
1110019D14Rik	chr6-13872052-13872552	0.0777323	0.470958	0.013	0.01	1	ENSMUST00000181225	ENSMUSG00000097616	lincRNA	gap	chr6-13871628-13881272	0
1110019D14Rik	chr6-14207465-14207965	0.305289	-0.173652	0.02	0.023	1	ENSMUST00000181090	ENSMUSG00000097616	lincRNA	exon	chr6-14044194-14044373	163091
1110020A21Rik	chr17-84890900-84891400	0.0125765	0.659964	0.014	0.01	1	ENSMUST00000181147	ENSMUSG00000097047	lincRNA	exon	chr17-84954967-84955308	63566
1110020A21Rik	chr17-84935667-84936167	0.632336	0.109428	0.019	0.017	1	ENSMUST00000181147	ENSMUSG00000097047	lincRNA	exon	chr17-84954967-84955308	18799
1110020A21Rik	chr17-84873527-84874027	0.32267	0.131185	0.047	0.044	1	ENSMUST00000181147	ENSMUSG00000097047	lincRNA	exon	chr17-84954967-84955308	80939
1110032A03Rik	chr9-50767679-50768179	0.0727984	0.150106	0.12	0.112	1	ENSMUST00000177546	ENSMUSG00000037971	protein_coding	cds	chr9-50767858-50767899	0
1110032A03Rik	chr9-50763270-50763770	0.2033	0.278482	0.017	0.014	1	ENSMUST00000177546	ENSMUSG00000037971	protein_coding	utr	chr9-50763701-50763855	0
1110032F04Rik	chr3-68870157-68870657	0.0130491	-0.548257	0.013	0.017	1	ENSMUST00000054551	ENSMUSG00000046999	protein_coding	cds	chr3-68869708-68870451	0
1110034G24Rik	chr2-132687330-132687830	0.400835	-0.177508	0.016	0.016	1	ENSMUST00000061891	ENSMUSG00000044991	protein_coding	gap	chr2-132686982-132691949	0
1110034G24Rik	chr2-132711992-132712492	0.371006	0.250882	0.01	0.009	1	ENSMUST00000148271	ENSMUSG00000044991	protein_coding	gap	chr2-132692132-132750212	0
1110034G24Rik	chr2-132715289-132715789	0.408559	-0.112462	0.031	0.032	1	ENSMUST00000148271	ENSMUSG00000044991	protein_coding	gap	chr2-132692132-132750212	0
1110034G24Rik	chr2-132716103-132716603	0.500143	0.103635	0.037	0.034	1	ENSMUST00000148271	ENSMUSG00000044991	protein_coding	gap	chr2-132692132-132750212	0
1110034G24Rik	chr2-132721151-132721651	0.309373	-0.227504	0.012	0.014	1	ENSMUST00000148271	ENSMUSG00000044991	protein_coding	gap	chr2-132692132-132750212	0
1110034G24Rik	chr2-132736993-132737493	0.046259	-0.294175	0.03	0.034	1	ENSMUST00000148271	ENSMUSG00000044991	protein_coding	gap	chr2-132692132-132750212	0
1110034G24Rik	chr2-132738385-132738885	0.454275	-0.116692	0.025	0.027	1	ENSMUST00000148271	ENSMUSG00000044991	protein_coding	gap	chr2-132692132-132750212	0
1110034G24Rik	chr2-132738942-132739442	0.111273	-0.216256	0.033	0.039	1	ENSMUST00000148271	ENSMUSG00000044991	protein_coding	gap	chr2-132692132-132750212	0
1110034G24Rik	chr2-132742012-132742512	0.0689644	0.483594	0.013	0.009	1	ENSMUST00000148271	ENSMUSG00000044991	protein_coding	gap	chr2-132692132-132750212	0
1110036E04Rik	chr9-64049967-64050467	0.045839	0.370692	0.025	0.021	1	ENSMUST00000181151	ENSMUSG00000097036	lincRNA	gap	chr9-64049896-64053188	0
1110036E04Rik	chr9-64058177-64058677	0.00937915	0.751535	0.012	0.007	1	ENSMUST00000181151	ENSMUSG00000097036	lincRNA	exon	chr9-64053497-64054100	4076
1110037F02Rik	chr4-11485037-11485537	0.213133	0.274796	0.018	0.014	1	ENSMUST00000055372	ENSMUSG00000040720	protein_coding	exon	chr4-11485958-11486105	420
1110037F02Rik	chr4-11513229-11513729	0.115325	0.256863	0.03	0.029	1	ENSMUST00000108307	ENSMUSG00000040720	protein_coding	cds	chr4-11513028-11514168	0
1110037F02Rik	chr4-11530581-11531081	0.61244	-0.103006	0.016	0.015	1	ENSMUST00000108307	ENSMUSG00000040720	protein_coding	cds	chr4-11530828-11531045	0
1110037F02Rik	chr4-11545787-11546287	0.0849771	0.430026	0.014	0.01	1	ENSMUST00000108307	ENSMUSG00000040720	protein_coding	cds	chr4-11545969-11546300	0
1110037F02Rik	chr4-11550084-11550584	0.431327	0.154029	0.022	0.019	1	ENSMUST00000108307	ENSMUSG00000040720	protein_coding	utr	chr4-11549700-11550684	0
1110038B12Rik	chr17-34947548-34948048	0.441202	0.198631	0.012	0.011	1	ENSMUST00000174464	ENSMUSG00000092203	processed_transcript	exon	chr17-34950238-34950475	2189
1110038B12Rik	chr17-34951524-34952024	0.425757	0.229797	0.011	0.01	1	ENSMUST00000174714	ENSMUSG00000092203	processed_transcript	gap	chr17-34950848-34952135	0
1110038F14Rik	chr15-76973651-76974151	0.00182089	0.305892	0.084	0.071	1	ENSMUST00000071792	ENSMUSG00000063236	protein_coding	utr	chr15-76950389-76950729	22921
1110051M20Rik	chr2-91291249-91291749	0.0245339	-0.143394	0.134	0.148	1	ENSMUST00000102594	ENSMUSG00000040591	protein_coding	gap	chr2-91284321-91304748	0
1110051M20Rik	chr2-91327971-91328471	1.77505e-05	-0.14797	0.362	0.395	1	ENSMUST00000145573	ENSMUSG00000040591	protein_coding	gap	chr2-91304834-91383728	0
1110051M20Rik	chr2-91329384-91329884	0.169902	0.238937	0.031	0.024	1	ENSMUST00000145573	ENSMUSG00000040591	protein_coding	gap	chr2-91304834-91383728	0
1110051M20Rik	chr2-91332413-91332913	0.0356055	-0.430523	0.015	0.02	1	ENSMUST00000145573	ENSMUSG00000040591	protein_coding	gap	chr2-91304834-91383728	0
1110051M20Rik	chr2-91348442-91348942	0.116377	0.248946	0.035	0.03	1	ENSMUST00000145573	ENSMUSG00000040591	protein_coding	gap	chr2-91304834-91383728	0
1110051M20Rik	chr2-91349828-91350328	0.220692	-0.293058	0.011	0.012	1	ENSMUST00000145573	ENSMUSG00000040591	protein_coding	gap	chr2-91304834-91383728	0
1110051M20Rik	chr2-91386930-91387430	0.597023	-0.102201	0.016	0.017	1	ENSMUST00000145573	ENSMUSG00000040591	protein_coding	gap	chr2-91383860-91421865	0
1110051M20Rik	chr2-91399781-91400281	0.0297374	0.429746	0.024	0.019	1	ENSMUST00000145573	ENSMUSG00000040591	protein_coding	gap	chr2-91383860-91421865	0
1110051M20Rik	chr2-91437358-91437858	0.14231	0.195597	0.049	0.042	1	ENSMUST00000145573	ENSMUSG00000040591	protein_coding	gap	chr2-91421969-91444568	0
1110051M20Rik	chr2-91439268-91439768	0.353628	0.226497	0.014	0.012	1	ENSMUST00000145573	ENSMUSG00000040591	protein_coding	gap	chr2-91421969-91444568	0
1110051M20Rik	chr2-91444447-91444947	0.0227677	-0.154243	0.119	0.13	1	ENSMUST00000102594	ENSMUSG00000040591	protein_coding	cds	chr2-91444569-91444614	0
1110054M08Rik	chr16-24238137-24238637	0.00320202	-0.167889	0.165	0.18	1	ENSMUST00000181640	ENSMUSG00000097867	lincRNA	exon	chr16-24391612-24393107	152974
1110054M08Rik	chr16-24326440-24326940	0.143738	0.145765	0.087	0.081	1	ENSMUST00000181640	ENSMUSG00000097867	lincRNA	exon	chr16-24391612-24393107	64671
1110054M08Rik	chr16-24353733-24354233	0.0142011	-0.712349	0.007	0.011	1	ENSMUST00000181640	ENSMUSG00000097867	lincRNA	exon	chr16-24391612-24393107	37378
1110054M08Rik	chr16-24361639-24362139	0.128659	0.448892	0.01	0.007	1	ENSMUST00000181640	ENSMUSG00000097867	lincRNA	exon	chr16-24391612-24393107	29472
1110054M08Rik	chr16-24391077-24391577	0.534978	0.155285	0.015	0.013	1	ENSMUST00000181640	ENSMUSG00000097867	lincRNA	exon	chr16-24391612-24393107	34
1110057K04Rik	chr12-8207898-8208398	0.247857	0.110577	0.092	0.087	1	ENSMUST00000169104	ENSMUSG00000037669	protein_coding	utr	chr12-8208127-8208204	0
1110059E24Rik	chr19-21598940-21599440	0.333696	-0.142137	0.027	0.03	1	ENSMUST00000180304	ENSMUSG00000035171	protein_coding	gap	chr19-21598869-21610605	0
1110059E24Rik	chr19-21610167-21610667	0.063604	0.493616	0.013	0.009	1	ENSMUST00000180304	ENSMUSG00000035171	protein_coding	utr	chr19-21610606-21610662	0
1110059E24Rik	chr19-21623702-21624202	0.0975966	0.265105	0.034	0.029	1	ENSMUST00000180304	ENSMUSG00000035171	protein_coding	gap	chr19-21619216-21630509	0
1110059E24Rik	chr19-21652301-21652801	0.0949794	0.15619	0.102	0.089	1	ENSMUST00000180304	ENSMUSG00000035171	protein_coding	cds	chr19-21652607-21652610	0
1110059G10Rik	chr9-122950175-122950675	0.0684045	0.440413	0.016	0.012	1	ENSMUST00000118422	ENSMUSG00000032551	protein_coding	gap	chr9-122948109-122950804	0
1110065P20Rik	chr4-124849495-124849995	0.0075469	-0.16265	0.152	0.167	1	ENSMUST00000185036	ENSMUSG00000078570	protein_coding	cds	chr4-124849867-124849962	0
1190002F15Rik	chr6-134927183-134927683	0.241023	0.156504	0.05	0.042	1	ENSMUST00000183867	ENSMUSG00000098318	lincRNA	exon	chr6-134929092-134929260	1408
1190002F15Rik	chr6-134947302-134947802	0.170116	-0.175905	0.035	0.039	1	ENSMUST00000185152	ENSMUSG00000098318	lincRNA	gap	chr6-134943738-134951305	0
1190002F15Rik	chr6-134927855-134928355	0.00870585	0.513952	0.025	0.017	1	ENSMUST00000183867	ENSMUSG00000098318	lincRNA	exon	chr6-134929092-134929260	736
1190002F15Rik	chr6-134928528-134929028	0.00377211	0.248664	0.112	0.091	1	ENSMUST00000183867	ENSMUSG00000098318	lincRNA	exon	chr6-134929092-134929260	63
1190002F15Rik	chr6-134932736-134933236	0.438083	-0.205661	0.01	0.011	1	ENSMUST00000185152	ENSMUSG00000098318	lincRNA	gap	chr6-134929261-134943639	0
1190002F15Rik	chr6-134953836-134954336	0.509203	0.139207	0.018	0.017	1	ENSMUST00000184504	ENSMUSG00000098318	lincRNA	exon	chr6-134951306-134951718	2117
1190002F15Rik	chr6-134960374-134960874	0.216661	-0.19776	0.025	0.027	1	ENSMUST00000184504	ENSMUSG00000098318	lincRNA	exon	chr6-134951306-134951718	8655
1190002N15Rik	chr9-94410886-94411386	0.0634967	0.478455	0.014	0.01	1	ENSMUST00000113028	ENSMUSG00000045414	protein_coding	utr	chr9-94517864-94520314	106477
1190002N15Rik	chr9-94526377-94526877	0.0805892	0.53095	0.01	0.008	1	ENSMUST00000113028	ENSMUSG00000045414	protein_coding	gap	chr9-94524696-94537218	0
1190002N15Rik	chr9-94536961-94537461	0.185576	0.139431	0.077	0.073	1	ENSMUST00000113028	ENSMUSG00000045414	protein_coding	cds	chr9-94537219-94537875	0
1190002N15Rik	chr9-94114872-94115372	0.00240189	-0.211747	0.121	0.136	1	ENSMUST00000113028	ENSMUSG00000045414	protein_coding	utr	chr9-94517864-94520314	402491
1190002N15Rik	chr9-94370977-94371477	0.100134	-0.123623	0.1	0.104	1	ENSMUST00000113028	ENSMUSG00000045414	protein_coding	utr	chr9-94517864-94520314	146386
1190002N15Rik	chr9-94395044-94395544	0.128178	-0.189691	0.041	0.046	1	ENSMUST00000113028	ENSMUSG00000045414	protein_coding	utr	chr9-94517864-94520314	122319
1190002N15Rik	chr9-94300361-94300861	0.0508964	0.394383	0.021	0.017	1	ENSMUST00000113028	ENSMUSG00000045414	protein_coding	utr	chr9-94517864-94520314	217002
1190002N15Rik	chr9-94410009-94410509	0.175579	-0.20048	0.028	0.033	1	ENSMUST00000113028	ENSMUSG00000045414	protein_coding	utr	chr9-94517864-94520314	107354
1190002N15Rik	chr9-94116914-94117414	0.0250959	-0.226603	0.057	0.067	1	ENSMUST00000113028	ENSMUSG00000045414	protein_coding	utr	chr9-94517864-94520314	400449
1190005I06Rik	chr8-120634203-120634703	3.22863e-05	0.25503	0.19	0.163	1	ENSMUST00000144417	ENSMUSG00000043687	protein_coding	cds	chr8-120634199-120634354	0
1190007I07Rik	chr10-82623108-82623608	0.0438866	0.151067	0.14	0.127	1	ENSMUST00000185168	ENSMUSG00000063320	protein_coding	utr	chr10-82623153-82623228	0
1200007C13Rik	chr2-167823422-167823922	0.0675561	0.468647	0.013	0.009	1	ENSMUST00000143649	ENSMUSG00000087684	lincRNA	exon	chr2-167827693-167829431	3770
1200007C13Rik	chr2-167834803-167835303	0.307903	0.169319	0.035	0.029	1	ENSMUST00000143649	ENSMUSG00000087684	lincRNA	exon	chr2-167832931-167833646	1156
1200014J11Rik	chr11-73047013-73047513	0.200423	0.236916	0.027	0.023	1	ENSMUST00000021135	ENSMUSG00000020783	protein_coding	exon	chr11-73047783-73048082	269
1200014J11Rik	chr11-73049256-73049756	0.160189	0.160553	0.062	0.055	1	ENSMUST00000151823	ENSMUSG00000020783	protein_coding	gap	chr11-73048083-73049858	0
1200014J11Rik	chr11-73071779-73072279	0.230534	0.201308	0.029	0.025	1	ENSMUST00000021135	ENSMUSG00000020783	protein_coding	gap	chr11-73070902-73073225	0
1200014J11Rik	chr11-73075539-73076039	0.358599	0.194091	0.019	0.017	1	ENSMUST00000021135	ENSMUSG00000020783	protein_coding	cds	chr11-73075615-73075769	0
1200014J11Rik	chr11-73077252-73077752	0.352598	0.178201	0.026	0.022	1	ENSMUST00000021135	ENSMUSG00000020783	protein_coding	gap	chr11-73075770-73077854	0
1300002E11Rik	chr16-21794870-21795370	0.516741	0.191557	0.011	0.009	1	ENSMUST00000181960	ENSMUSG00000097290	lincRNA	gap	chr16-21794447-21795849	0
1300002E11Rik	chr16-21804211-21804711	0.523084	-0.137412	0.014	0.014	1	ENSMUST00000181960	ENSMUSG00000097290	lincRNA	gap	chr16-21795976-21808677	0
1500002C15Rik	chr4-155733596-155734096	0.343884	0.255565	0.013	0.01	1	ENSMUST00000178987	ENSMUSG00000096221	protein_coding	cds	chr4-155733864-155734250	0
1500009C09Rik	chr15-82255188-82255688	0.103834	-0.160109	0.063	0.068	1	ENSMUST00000136948	ENSMUSG00000068099	protein_coding	gap	chr15-82252749-82259564	0
1500009C09Rik	chr15-82255795-82256295	0.0122963	0.117407	0.302	0.279	1	ENSMUST00000143238	ENSMUSG00000068099	protein_coding	utr	chr15-82256023-82256385	0
1500009C09Rik	chr15-82256625-82257125	0.387914	-0.105226	0.042	0.043	1	ENSMUST00000143238	ENSMUSG00000068099	protein_coding	gap	chr15-82256386-82259564	0
1500009C09Rik	chr15-82259455-82259955	0.221795	0.182451	0.037	0.034	1	ENSMUST00000143238	ENSMUSG00000068099	protein_coding	cds	chr15-82259579-82259785	0
1500009C09Rik	chr15-82266315-82266815	0.209051	0.220172	0.026	0.024	1	ENSMUST00000143238	ENSMUSG00000068099	protein_coding	utr	chr15-82259786-82260753	5561
1500009L16Rik	chr10-83688197-83688697	0.259552	-0.296689	0.009	0.011	1	ENSMUST00000150459	ENSMUSG00000087651	protein_coding	exon	chr10-83722865-83723034	34167
1500009L16Rik	chr10-83729434-83729934	0.246661	-0.153279	0.032	0.035	1	ENSMUST00000150459	ENSMUSG00000087651	protein_coding	gap	chr10-83723035-83737908	0
1500009L16Rik	chr10-83861864-83862364	0.00508056	0.226873	0.122	0.106	1	ENSMUST00000150459	ENSMUSG00000087651	protein_coding	utr	chr10-83761918-83762761	99102
1500009L16Rik	chr10-83865849-83866349	0.0121232	0.335979	0.047	0.036	1	ENSMUST00000150459	ENSMUSG00000087651	protein_coding	utr	chr10-83761918-83762761	103087
1500009L16Rik	chr10-83895636-83896136	0.0448116	-0.300193	0.028	0.031	1	ENSMUST00000150459	ENSMUSG00000087651	protein_coding	utr	chr10-83761918-83762761	132874
1500009L16Rik	chr10-84060562-84061062	0.286821	0.256634	0.016	0.013	1	ENSMUST00000150459	ENSMUSG00000087651	protein_coding	utr	chr10-83761918-83762761	297800
1500011B03Rik	chr5-114807392-114807892	0.0208987	0.195793	0.108	0.095	1	ENSMUST00000112160	ENSMUSG00000072694	protein_coding	utr	chr5-114808196-114809245	303
1500011K16Rik	chr2-127792255-127792755	0.0484215	0.151684	0.131	0.118	1	ENSMUST00000135091	ENSMUSG00000051319	protein_coding	cds	chr2-127792297-127792467	0
1500012K07Rik	chr7-75370834-75371334	0.292267	0.148453	0.042	0.037	1	ENSMUST00000181846	ENSMUSG00000097247	lincRNA	exon	chr7-75329405-75331419	39414
1500012K07Rik	chr7-75384356-75384856	0.258744	0.273881	0.015	0.012	1	ENSMUST00000181846	ENSMUSG00000097247	lincRNA	exon	chr7-75329405-75331419	52936
1500015L24Rik	chr19-20491893-20492393	0.00518604	-0.356415	0.037	0.05	1	ENSMUST00000179640	ENSMUSG00000094732	lincRNA	exon	chr19-20422259-20422787	69105
1500015L24Rik	chr19-20508417-20508917	0.038862	-0.337919	0.024	0.028	1	ENSMUST00000179640	ENSMUSG00000094732	lincRNA	exon	chr19-20422259-20422787	85629
1500015O10Rik	chr1-43662407-43662907	0.0297313	0.496764	0.017	0.013	1	ENSMUST00000027217	ENSMUSG00000026051	protein_coding	exon	chr1-43730602-43730963	67694
1500015O10Rik	chr1-43694076-43694576	0.654599	0.10458	0.018	0.016	1	ENSMUST00000027217	ENSMUSG00000026051	protein_coding	exon	chr1-43730602-43730963	36025
1500015O10Rik	chr1-43698451-43698951	0.0892143	0.147693	0.105	0.096	1	ENSMUST00000027217	ENSMUSG00000026051	protein_coding	exon	chr1-43730602-43730963	31650
1500015O10Rik	chr1-43738114-43738614	0.545252	0.104579	0.028	0.026	1	ENSMUST00000027217	ENSMUSG00000026051	protein_coding	cds	chr1-43738560-43738717	0
1500017E21Rik	chr19-36695665-36696165	0.310944	0.237385	0.015	0.013	1	ENSMUST00000149601	ENSMUSG00000087579	processed_transcript	gap	chr19-36658567-36705442	0
1500017E21Rik	chr19-36666321-36666821	0.000850661	-0.375238	0.048	0.06	1	ENSMUST00000149601	ENSMUSG00000087579	processed_transcript	gap	chr19-36658567-36705442	0
1500017E21Rik	chr19-36669656-36670156	0.341139	0.119643	0.058	0.051	1	ENSMUST00000149601	ENSMUSG00000087579	processed_transcript	gap	chr19-36658567-36705442	0
1500017E21Rik	chr19-36670714-36671214	0.388082	-0.155187	0.02	0.021	1	ENSMUST00000149601	ENSMUSG00000087579	processed_transcript	gap	chr19-36658567-36705442	0
1500017E21Rik	chr19-36678265-36678765	0.271467	0.124347	0.073	0.069	1	ENSMUST00000149601	ENSMUSG00000087579	processed_transcript	gap	chr19-36658567-36705442	0
1500017E21Rik	chr19-36679388-36679888	0.319466	-0.145351	0.03	0.031	1	ENSMUST00000149601	ENSMUSG00000087579	processed_transcript	gap	chr19-36658567-36705442	0
1500017E21Rik	chr19-36689185-36689685	0.664787	0.141559	0.01	0.008	1	ENSMUST00000149601	ENSMUSG00000087579	processed_transcript	gap	chr19-36658567-36705442	0
1500017E21Rik	chr19-36689862-36690362	0.531568	0.17085	0.012	0.01	1	ENSMUST00000149601	ENSMUSG00000087579	processed_transcript	gap	chr19-36658567-36705442	0
1500017E21Rik	chr19-36693471-36693971	0.156863	0.43256	0.01	0.008	1	ENSMUST00000149601	ENSMUSG00000087579	processed_transcript	gap	chr19-36658567-36705442	0
1500035N22Rik	chr5-24985577-24986077	0.27601	0.220671	0.021	0.019	1	ENSMUST00000075081	ENSMUSG00000059631	protein_coding	cds	chr5-24986014-24986036	0
1520401A03Rik	chr17-23699216-23699716	0.0345896	-0.592198	0.007	0.011	1	ENSMUST00000178006	ENSMUSG00000043747	processed_transcript	exon	chr17-23704488-23705235	4771
1520401A03Rik	chr17-23706160-23706660	0.0936434	-0.200331	0.042	0.046	1	ENSMUST00000178006	ENSMUSG00000043747	processed_transcript	gap	chr17-23706327-23707412	0
1600002D24Rik	chr16-95847973-95848473	0.332577	0.152442	0.035	0.03	1	ENSMUST00000136744	ENSMUSG00000086899	lincRNA	gap	chr16-95843258-95897983	0
1600002D24Rik	chr16-95945328-95945828	0.182074	-0.137763	0.053	0.057	1	ENSMUST00000127413	ENSMUSG00000086899	lincRNA	exon	chr16-95929016-95929077	16250
1600002K03Rik	chr10-80173467-80173967	0.247817	0.322927	0.012	0.009	1	ENSMUST00000041882	ENSMUSG00000035595	protein_coding	gap	chr10-80173175-80174208	0
1600002K03Rik	chr10-80175445-80175945	0.118771	0.136797	0.1	0.091	1	ENSMUST00000041882	ENSMUSG00000035595	protein_coding	utr	chr10-80174818-80175146	298
1600010M07Rik	chr7-110002951-110003451	0.196962	0.391991	0.01	0.007	1	ENSMUST00000191157	ENSMUSG00000101585	lincRNA	gap	chr7-109998774-110003585	0
1600010M07Rik	chr7-110018578-110019078	0.104604	-0.16451	0.06	0.064	1	ENSMUST00000185931	ENSMUSG00000101585	lincRNA	gap	chr7-110003716-110147627	0
1600010M07Rik	chr7-110030323-110030823	0.163268	0.26244	0.023	0.02	1	ENSMUST00000185931	ENSMUSG00000101585	lincRNA	gap	chr7-110003716-110147627	0
1600010M07Rik	chr7-110083739-110084239	0.0830536	-0.275937	0.025	0.028	1	ENSMUST00000185931	ENSMUSG00000101585	lincRNA	gap	chr7-110003716-110147627	0
1600010M07Rik	chr7-110116776-110117276	0.0676336	-0.207031	0.05	0.056	1	ENSMUST00000185931	ENSMUSG00000101585	lincRNA	gap	chr7-110003716-110147627	0
1600010M07Rik	chr7-110164708-110165208	0.0901641	0.122722	0.147	0.135	1	ENSMUST00000185931	ENSMUSG00000101585	lincRNA	exon	chr7-110150565-110151202	13505
1600012H06Rik	chr17-14942356-14942856	0.0147766	0.648091	0.014	0.009	1	ENSMUST00000052691	ENSMUSG00000050088	protein_coding	exon	chr17-14943184-14943319	327
1600012H06Rik	chr17-14943411-14943911	0.316003	0.151636	0.04	0.039	1	ENSMUST00000174004	ENSMUSG00000050088	protein_coding	cds	chr17-14943613-14944170	0
1600014C10Rik	chr7-38174286-38174786	0.149434	0.297902	0.021	0.017	1	ENSMUST00000165308	ENSMUSG00000054676	protein_coding	exon	chr7-38183217-38183521	8430
1600014C10Rik	chr7-38182493-38182993	0.0842043	0.171456	0.082	0.072	1	ENSMUST00000165308	ENSMUSG00000054676	protein_coding	exon	chr7-38183217-38183521	223
1600014C23Rik	chr17-45724168-45724668	0.0142034	0.189964	0.129	0.112	1	ENSMUST00000178179	ENSMUSG00000094690	protein_coding	utr	chr17-45732864-45733024	8195
1600014C23Rik	chr17-45728301-45728801	0.114751	0.313893	0.022	0.019	1	ENSMUST00000178179	ENSMUSG00000094690	protein_coding	utr	chr17-45732864-45733024	4062
1600014C23Rik	chr17-45731088-45731588	0.00326836	0.179649	0.195	0.17	1	ENSMUST00000178179	ENSMUSG00000094690	protein_coding	utr	chr17-45732864-45733024	1275
1600014C23Rik	chr17-45732511-45733011	0.295448	-0.170228	0.026	0.026	1	ENSMUST00000178179	ENSMUSG00000094690	protein_coding	utr	chr17-45732864-45733024	0
1600014C23Rik	chr17-45733056-45733556	0.000132777	0.219382	0.221	0.192	1	ENSMUST00000178179	ENSMUSG00000094690	protein_coding	cds	chr17-45733025-45733122	0
1600014K23Rik	chrX-85319171-85319671	0.393885	0.225051	0.011	0.01	1	ENSMUST00000048382	ENSMUSG00000035491	protein_coding	utr	chrX-85270162-85270288	48882
1600020E01Rik	chr6-86526493-86526993	0.00862882	-0.100247	0.301	0.315	1	ENSMUST00000180896	ENSMUSG00000097048	lincRNA	exon	chr6-86526271-86527974	0
1600020E01Rik	chr6-86527040-86527540	0.0399341	0.151793	0.148	0.135	1	ENSMUST00000181928	ENSMUSG00000097048	lincRNA	gap	chr6-86527532-86527890	0
1600020E01Rik	chr6-86544000-86544500	0.0701333	0.272176	0.037	0.03	1	ENSMUST00000181928	ENSMUSG00000097048	lincRNA	gap	chr6-86532308-86563431	0
1600020E01Rik	chr6-86550538-86551038	0.0897405	-0.292175	0.022	0.025	1	ENSMUST00000181928	ENSMUSG00000097048	lincRNA	gap	chr6-86532308-86563431	0
1600020E01Rik	chr6-86580590-86581090	0.381157	-0.144512	0.023	0.024	1	ENSMUST00000181928	ENSMUSG00000097048	lincRNA	exon	chr6-86564276-86564442	16147
1600020E01Rik	chr6-86583477-86583977	0.191917	0.407013	0.01	0.007	1	ENSMUST00000181928	ENSMUSG00000097048	lincRNA	exon	chr6-86564276-86564442	19034
1600020E01Rik	chr6-86584273-86584773	0.234904	0.126502	0.081	0.073	1	ENSMUST00000181928	ENSMUSG00000097048	lincRNA	exon	chr6-86564276-86564442	19830
1600025M17Rik	chrX-56274116-56274616	0.0125275	-0.580327	0.011	0.015	1	ENSMUST00000151426	ENSMUSG00000085114	lincRNA	exon	chrX-56317608-56317746	42991
1700001C02Rik	chr5-30465801-30466301	0.0980083	-0.219681	0.034	0.041	1	ENSMUST00000114743	ENSMUSG00000029182	protein_coding	cds	chr5-30466111-30466184	0
1700001C19Rik	chr17-47428944-47429444	0.572868	0.11929	0.019	0.018	1	ENSMUST00000160678	ENSMUSG00000047150	protein_coding	gap	chr17-47413895-47433335	0
1700001D01Rik	chr8-61283548-61284048	0.219132	0.286478	0.017	0.013	1	ENSMUST00000188654	ENSMUSG00000099419	lincRNA	gap	chr8-61282887-61288743	0
1700001G01Rik	chr18-17079058-17079558	0.376776	-0.133269	0.026	0.029	1	ENSMUST00000147119	ENSMUSG00000087170	lincRNA	gap	chr18-17019165-17122252	0
1700001G01Rik	chr18-17173315-17173815	0.203784	0.289117	0.016	0.014	1	ENSMUST00000147119	ENSMUSG00000087170	lincRNA	exon	chr18-17137139-17137559	35755
1700001K19Rik	chr12-110670162-110670662	0.383918	-0.216184	0.009	0.012	1	ENSMUST00000070659	ENSMUSG00000056508	protein_coding	cds	chr12-110670231-110670281	0
1700001L05Rik	chr15-83367122-83367622	0.0202592	-0.30954	0.034	0.041	1	ENSMUST00000178628	ENSMUSG00000075511	lincRNA	exon	chr15-83366990-83367282	0
1700001L19Rik	chr13-68601165-68601665	0.145316	-0.167871	0.045	0.049	1	ENSMUST00000022007	ENSMUSG00000021534	protein_coding	gap	chr13-68597728-68611160	0
1700001L19Rik	chr13-68606162-68606662	0.127238	-0.432521	0.008	0.01	1	ENSMUST00000022007	ENSMUSG00000021534	protein_coding	gap	chr13-68597728-68611160	0
1700001L19Rik	chr13-68607633-68608133	0.441403	0.130797	0.032	0.029	1	ENSMUST00000022007	ENSMUSG00000021534	protein_coding	gap	chr13-68597728-68611160	0
1700001O22Rik	chr2-30757801-30758301	0.142295	-0.247308	0.024	0.026	1	ENSMUST00000139968	ENSMUSG00000044320	protein_coding	exon	chr2-30794769-30795009	36467
1700001O22Rik	chr2-30784548-30785048	0.266408	0.189818	0.03	0.025	1	ENSMUST00000139968	ENSMUSG00000044320	protein_coding	exon	chr2-30794769-30795009	9720
1700001O22Rik	chr2-30796417-30796917	0.00978691	0.168781	0.172	0.151	1	ENSMUST00000050003	ENSMUSG00000044320	protein_coding	cds	chr2-30796401-30796566	0
1700001O22Rik	chr2-30801529-30802029	0.304214	0.25513	0.015	0.011	1	ENSMUST00000050003	ENSMUSG00000044320	protein_coding	cds	chr2-30801140-30801557	0
1700001O22Rik	chr2-30758323-30758823	0.0592064	-0.105756	0.167	0.179	1	ENSMUST00000139968	ENSMUSG00000044320	protein_coding	exon	chr2-30794769-30795009	35945
1700001O22Rik	chr2-30767841-30768341	0.441166	-0.184437	0.011	0.012	1	ENSMUST00000139968	ENSMUSG00000044320	protein_coding	exon	chr2-30794769-30795009	26427
1700001O22Rik	chr2-30769161-30769661	0.0468438	0.294547	0.037	0.031	1	ENSMUST00000139968	ENSMUSG00000044320	protein_coding	exon	chr2-30794769-30795009	25107
1700001O22Rik	chr2-30772955-30773455	0.307695	-0.218073	0.013	0.016	1	ENSMUST00000139968	ENSMUSG00000044320	protein_coding	exon	chr2-30794769-30795009	21313
1700001O22Rik	chr2-30783273-30783773	0.152864	-0.105881	0.097	0.102	1	ENSMUST00000139968	ENSMUSG00000044320	protein_coding	exon	chr2-30794769-30795009	10995
1700001O22Rik	chr2-30795394-30795894	0.472454	-0.194018	0.009	0.01	1	ENSMUST00000050003	ENSMUSG00000044320	protein_coding	cds	chr2-30795695-30795805	0
1700003E16Rik	chr6-83162252-83162752	0.61653	0.137496	0.013	0.011	1	ENSMUST00000032106	ENSMUSG00000030030	protein_coding	cds	chr6-83161557-83162891	0
1700003E24Rik	chrX-93068818-93069318	0.638531	-0.105543	0.013	0.013	1	ENSMUST00000088134	ENSMUSG00000095110	protein_coding	exon	chrX-93156154-93156383	86835
1700003F12Rik	chr2-154548677-154549177	0.669834	0.104797	0.017	0.016	1	ENSMUST00000109709	ENSMUSG00000038523	protein_coding	cds	chr2-154548942-154549067	0
1700003G18Rik	chr7-116092479-116092979	0.176445	0.172033	0.055	0.048	1	ENSMUST00000150518	ENSMUSG00000087621	processed_transcript	gap	chr7-116089191-116093061	0
1700003L19Rik	chr16-12588815-12589315	0.0370093	-0.548568	0.008	0.011	1	ENSMUST00000190074	ENSMUSG00000101565	lincRNA	exon	chr16-12811390-12811522	222074
1700003L19Rik	chr16-12796626-12797126	0.297702	0.130904	0.055	0.051	1	ENSMUST00000190074	ENSMUSG00000101565	lincRNA	exon	chr16-12811390-12811522	14263
1700003L19Rik	chr16-12826177-12826677	0.324396	-0.229944	0.011	0.012	1	ENSMUST00000190074	ENSMUSG00000101565	lincRNA	gap	chr16-12822234-12847126	0
1700003L19Rik	chr16-12884465-12884965	0.00103299	-0.470911	0.029	0.039	1	ENSMUST00000190074	ENSMUSG00000101565	lincRNA	exon	chr16-12848339-12848653	35811
1700003L19Rik	chr16-12886136-12886636	0.0281065	-0.536618	0.01	0.015	1	ENSMUST00000190074	ENSMUSG00000101565	lincRNA	exon	chr16-12848339-12848653	37482
1700003L19Rik	chr16-12901695-12902195	0.0138515	-0.164277	0.126	0.141	1	ENSMUST00000190074	ENSMUSG00000101565	lincRNA	exon	chr16-12848339-12848653	53041
1700003M02Rik	chr4-34729966-34730466	0.054555	0.168659	0.099	0.089	1	ENSMUST00000162495	ENSMUSG00000028294	protein_coding	utr	chr4-34730060-34730195	0
1700003M07Rik	chr4-129960871-129961371	0.415998	-0.115395	0.031	0.033	1	ENSMUST00000147634	ENSMUSG00000085389	lincRNA	gap	chr4-129961281-129963371	0
1700003M07Rik	chr4-129961558-129962058	0.346791	-0.18762	0.016	0.018	1	ENSMUST00000147634	ENSMUSG00000085389	lincRNA	gap	chr4-129961281-129963371	0
1700003M07Rik	chr4-129966725-129967225	0.0641381	-0.291055	0.029	0.031	1	ENSMUST00000139884	ENSMUSG00000085389	lincRNA	exon	chr4-129963372-129963657	3067
1700003M07Rik	chr4-129967306-129967806	0.0119284	0.137528	0.229	0.215	1	ENSMUST00000139884	ENSMUSG00000085389	lincRNA	exon	chr4-129963372-129963657	3648
1700003M07Rik	chr4-129973982-129974482	0.0250645	-0.508771	0.012	0.016	1	ENSMUST00000139884	ENSMUSG00000085389	lincRNA	exon	chr4-129963372-129963657	10324
1700006E09Rik	chr11-101984059-101984559	0.0529117	0.159794	0.121	0.101	1	ENSMUST00000176722	ENSMUSG00000010841	protein_coding	utr	chr11-101984279-101984378	0
1700006H21Rik	chr13-107600545-107601045	0.0640983	-0.346465	0.018	0.022	1	ENSMUST00000188490	ENSMUSG00000102000	lincRNA	exon	chr13-107687397-107687584	86351
1700006H21Rik	chr13-107616717-107617217	0.034012	0.400743	0.024	0.018	1	ENSMUST00000188490	ENSMUSG00000102000	lincRNA	exon	chr13-107687397-107687584	70179
1700006H21Rik	chr13-107635127-107635627	0.658181	-0.108617	0.01	0.01	1	ENSMUST00000188490	ENSMUSG00000102000	lincRNA	exon	chr13-107687397-107687584	51769
1700006H21Rik	chr13-107646031-107646531	0.00110503	-0.139111	0.271	0.294	1	ENSMUST00000188490	ENSMUSG00000102000	lincRNA	exon	chr13-107687397-107687584	40865
1700006H21Rik	chr13-107647360-107647860	0.417064	0.134629	0.031	0.029	1	ENSMUST00000188490	ENSMUSG00000102000	lincRNA	exon	chr13-107687397-107687584	39536
1700006H21Rik	chr13-107653790-107654290	0.406352	0.113001	0.048	0.044	1	ENSMUST00000188490	ENSMUSG00000102000	lincRNA	exon	chr13-107687397-107687584	33106
1700006H21Rik	chr13-107676292-107676792	0.197924	-0.128435	0.063	0.066	1	ENSMUST00000188490	ENSMUSG00000102000	lincRNA	exon	chr13-107687397-107687584	10604
1700006H21Rik	chr13-107699749-107700249	0.100414	-0.167515	0.06	0.065	1	ENSMUST00000188490	ENSMUSG00000102000	lincRNA	exon	chr13-107691891-107692173	7575
1700007B14Rik	chr8-75457046-75457546	0.0531572	0.395725	0.022	0.016	1	ENSMUST00000121983	ENSMUSG00000031620	protein_coding	gap	chr8-75449007-75462608	0
1700007B14Rik	chr8-75828522-75829022	0.0250087	0.291227	0.05	0.04	1	ENSMUST00000121983	ENSMUSG00000031620	protein_coding	gap	chr8-75763110-75888496	0
1700007B14Rik	chr8-76067667-76068167	0.469107	-0.157954	0.013	0.013	1	ENSMUST00000121983	ENSMUSG00000031620	protein_coding	utr	chr8-75984296-75984503	83163
1700007F19Rik	chr3-58089729-58090229	0.173727	0.355454	0.013	0.01	1	ENSMUST00000188418	ENSMUSG00000100666	lincRNA	exon	chr3-58141707-58142886	51477
1700007F19Rik	chr3-58112460-58112960	0.397203	0.239961	0.011	0.011	1	ENSMUST00000188418	ENSMUSG00000100666	lincRNA	exon	chr3-58141707-58142886	28746
1700007F19Rik	chr3-58159354-58159854	0.340003	-0.186552	0.015	0.017	1	ENSMUST00000188418	ENSMUSG00000100666	lincRNA	gap	chr3-58148511-58162345	0
1700007F19Rik	chr3-58207163-58207663	0.0672068	-0.465402	0.01	0.013	1	ENSMUST00000188418	ENSMUSG00000100666	lincRNA	exon	chr3-58163762-58163807	43355
1700007F19Rik	chr3-58210954-58211454	0.0195613	-0.230065	0.063	0.07	1	ENSMUST00000188418	ENSMUSG00000100666	lincRNA	exon	chr3-58163762-58163807	47146
1700007G11Rik	chr5-98329029-98329529	0.0477571	0.219783	0.072	0.062	1	ENSMUST00000080333	ENSMUSG00000057816	protein_coding	cds	chr5-98329354-98329464	0
1700007G11Rik	chr5-98732102-98732602	0.428284	-0.201956	0.01	0.011	1	ENSMUST00000080333	ENSMUSG00000057816	protein_coding	gap	chr5-98498380-98737568	0
1700007G11Rik	chr5-98762179-98762679	0.266403	-0.128081	0.048	0.049	1	ENSMUST00000080333	ENSMUSG00000057816	protein_coding	gap	chr5-98737712-98784418	0
1700007J10Rik	chr11-59731880-59732380	0.387234	0.183175	0.019	0.02	1	ENSMUST00000153431	ENSMUSG00000086330	processed_transcript	gap	chr11-59731629-59733794	0
1700007J10Rik	chr11-59733570-59734070	0.37825	0.251841	0.01	0.009	1	ENSMUST00000153431	ENSMUSG00000086330	processed_transcript	gap	chr11-59731629-59733794	0
1700007K13Rik	chr2-28463887-28464387	0.392006	0.195577	0.017	0.014	1	ENSMUST00000127683	ENSMUSG00000026831	protein_coding	gap	chr2-28462431-28465136	0
1700007L15Rik	chr16-33379891-33380391	0.386145	0.19291	0.019	0.017	1	ENSMUST00000180923	ENSMUSG00000097318	lincRNA	gap	chr16-33380380-33380515	0
1700008I05Rik	chrX-135652306-135652806	0.0123914	0.734014	0.011	0.007	1	ENSMUST00000078605	ENSMUSG00000058252	protein_coding	utr	chrX-135654698-135654892	1891
1700008I05Rik	chrX-135687843-135688343	0.100412	0.356107	0.02	0.014	1	ENSMUST00000078605	ENSMUSG00000058252	protein_coding	gap	chrX-135669428-135693161	0
1700008K24Rik	chr17-49111858-49112358	0.0336962	-0.536677	0.009	0.013	1	ENSMUST00000188649	ENSMUSG00000101012	lincRNA	exon	chr17-49112265-49112849	0
1700008K24Rik	chr17-49171983-49172483	0.101346	-0.349492	0.014	0.016	1	ENSMUST00000186479	ENSMUSG00000101012	lincRNA	exon	chr17-49113173-49113535	58447
1700008K24Rik	chr17-49182426-49182926	0.226398	0.340301	0.011	0.009	1	ENSMUST00000186479	ENSMUSG00000101012	lincRNA	exon	chr17-49113173-49113535	68890
1700008K24Rik	chr17-49189747-49190247	0.142445	0.328964	0.017	0.013	1	ENSMUST00000186479	ENSMUSG00000101012	lincRNA	exon	chr17-49113173-49113535	76211
1700008K24Rik	chr17-49205056-49205556	0.308986	-0.15642	0.027	0.028	1	ENSMUST00000186479	ENSMUSG00000101012	lincRNA	exon	chr17-49113173-49113535	91520
1700008K24Rik	chr17-49230557-49231057	0.269385	0.24784	0.02	0.014	1	ENSMUST00000186479	ENSMUSG00000101012	lincRNA	exon	chr17-49113173-49113535	117021
1700008K24Rik	chr17-49231256-49231756	0.00107048	0.206247	0.186	0.16	1	ENSMUST00000186479	ENSMUSG00000101012	lincRNA	exon	chr17-49113173-49113535	117720
1700008K24Rik	chr17-49245789-49246289	0.149965	0.180535	0.052	0.044	1	ENSMUST00000186479	ENSMUSG00000101012	lincRNA	exon	chr17-49113173-49113535	132253
1700008O03Rik	chr7-44360646-44361146	0.335244	0.20844	0.02	0.018	1	ENSMUST00000150886	ENSMUSG00000008028	protein_coding	cds	chr7-44361050-44361183	0
1700008O03Rik	chr7-44374840-44375340	0.420043	0.209906	0.014	0.012	1	ENSMUST00000107933	ENSMUSG00000008028	protein_coding	utr	chr7-44374987-44375030	0
1700008O03Rik	chr7-44378263-44378763	0.13479	-0.276545	0.02	0.02	1	ENSMUST00000150034	ENSMUSG00000008028	protein_coding	gap	chr7-44363016-44385609	0
1700008P02Rik	chr3-6427734-6428234	0.186625	0.108995	0.116	0.107	1	ENSMUST00000091364	ENSMUSG00000069118	protein_coding	utr	chr3-6615418-6615577	187183
1700008P02Rik	chr3-6773492-6773992	0.137552	-0.222494	0.027	0.032	1	ENSMUST00000091364	ENSMUSG00000069118	protein_coding	exon	chr3-6620006-6620443	153048
1700008P02Rik	chr3-6865223-6865723	0.302259	0.184318	0.028	0.023	1	ENSMUST00000091364	ENSMUSG00000069118	protein_coding	exon	chr3-6620006-6620443	244779
1700008P02Rik	chr3-6887085-6887585	0.0488645	0.229851	0.06	0.052	1	ENSMUST00000091364	ENSMUSG00000069118	protein_coding	exon	chr3-6620006-6620443	266641
1700009C05Rik	chr6-81465996-81466496	0.430462	-0.135209	0.022	0.023	1	ENSMUST00000191101	ENSMUSG00000101404	lincRNA	exon	chr6-81900464-81900748	433967
1700009C05Rik	chr6-81615281-81615781	0.035273	0.40755	0.023	0.017	1	ENSMUST00000191101	ENSMUSG00000101404	lincRNA	exon	chr6-81900464-81900748	284682
1700009C05Rik	chr6-81624964-81625464	0.108432	-0.236996	0.029	0.032	1	ENSMUST00000191101	ENSMUSG00000101404	lincRNA	exon	chr6-81900464-81900748	274999
1700009C05Rik	chr6-81660198-81660698	0.334996	0.110191	0.07	0.065	1	ENSMUST00000191101	ENSMUSG00000101404	lincRNA	exon	chr6-81900464-81900748	239765
1700009C05Rik	chr6-81724824-81725324	0.0183441	0.16765	0.153	0.135	1	ENSMUST00000191101	ENSMUSG00000101404	lincRNA	exon	chr6-81900464-81900748	175139
1700009C05Rik	chr6-81727186-81727686	0.271162	-0.197456	0.02	0.022	1	ENSMUST00000191101	ENSMUSG00000101404	lincRNA	exon	chr6-81900464-81900748	172777
1700009C05Rik	chr6-81769101-81769601	0.0692638	0.180474	0.083	0.074	1	ENSMUST00000191101	ENSMUSG00000101404	lincRNA	exon	chr6-81900464-81900748	130862
1700009C05Rik	chr6-81783105-81783605	0.141695	0.146512	0.085	0.078	1	ENSMUST00000191101	ENSMUSG00000101404	lincRNA	exon	chr6-81900464-81900748	116858
1700009C05Rik	chr6-81817228-81817728	0.192789	0.154726	0.058	0.052	1	ENSMUST00000191101	ENSMUSG00000101404	lincRNA	exon	chr6-81900464-81900748	82735
1700009N14Rik	chr4-39344242-39344742	0.650412	-0.101242	0.013	0.013	1	ENSMUST00000029955	ENSMUSG00000028287	protein_coding	exon	chr4-39450295-39450533	105552
1700009N14Rik	chr4-39344977-39345477	0.00078048	1.00661	0.012	0.007	1	ENSMUST00000029955	ENSMUSG00000028287	protein_coding	exon	chr4-39450295-39450533	104817
1700009N14Rik	chr4-39697488-39697988	0.401425	0.102222	0.054	0.051	1	ENSMUST00000029955	ENSMUSG00000028287	protein_coding	utr	chr4-39451447-39451776	245711
1700009P17Rik	chr1-171113802-171114302	0.1099	0.143648	0.1	0.09	1	ENSMUST00000129651	ENSMUSG00000026649	protein_coding	cds	chr1-171113938-171114096	0
1700009P17Rik	chr1-171122884-171123384	0.290139	0.289502	0.012	0.009	1	ENSMUST00000156789	ENSMUSG00000026649	protein_coding	cds	chr1-171123174-171123193	0
1700010I02Rik	chr3-7785953-7786453	0.0236486	-0.217361	0.067	0.076	1	ENSMUST00000188525	ENSMUSG00000100010	protein_coding	utr	chr3-7925303-7925340	138849
1700010I14Rik	chr17-9023030-9023530	0.437684	0.16513	0.019	0.018	1	ENSMUST00000024650	ENSMUSG00000023873	protein_coding	utr	chr17-9008214-9008319	14710
1700010I14Rik	chr17-9023554-9024054	0.147526	-0.423909	0.007	0.01	1	ENSMUST00000024650	ENSMUSG00000023873	protein_coding	utr	chr17-9008214-9008319	15234
1700010I14Rik	chr17-9026898-9027398	0.693429	0.114339	0.011	0.01	1	ENSMUST00000024650	ENSMUSG00000023873	protein_coding	utr	chr17-9008214-9008319	18578
1700010I14Rik	chr17-9031675-9032175	0.0541789	-0.187113	0.064	0.067	1	ENSMUST00000024650	ENSMUSG00000023873	protein_coding	utr	chr17-9008214-9008319	23355
1700010I14Rik	chr17-9032247-9032747	0.3793	0.222847	0.015	0.012	1	ENSMUST00000024650	ENSMUSG00000023873	protein_coding	utr	chr17-9008214-9008319	23927
1700010J16Rik	chr10-112795426-112795926	0.49156	0.153883	0.016	0.015	1	ENSMUST00000189116	ENSMUSG00000100314	lincRNA	exon	chr10-112785443-112785602	9823
1700010J16Rik	chr10-112801524-112802024	0.0775484	0.288224	0.029	0.024	1	ENSMUST00000189116	ENSMUSG00000100314	lincRNA	exon	chr10-112785443-112785602	15921
1700011B04Rik	chr13-35119731-35120231	0.0820449	0.458773	0.012	0.009	1	ENSMUST00000189905	ENSMUSG00000102099	processed_transcript	exon	chr13-35180267-35182749	60035
1700011I03Rik	chr18-57562848-57563348	0.185854	0.163026	0.057	0.05	1	ENSMUST00000123872	ENSMUSG00000058925	protein_coding	cds	chr18-57563176-57563291	0
1700011I03Rik	chr18-57570823-57571323	0.101681	0.364442	0.019	0.015	1	ENSMUST00000135806	ENSMUSG00000058925	protein_coding	gap	chr18-57564043-57591967	0
1700011I03Rik	chr18-57646449-57646949	0.12405	0.338816	0.018	0.014	1	ENSMUST00000135806	ENSMUSG00000058925	protein_coding	gap	chr18-57594136-57730714	0
1700011I03Rik	chr18-57670450-57670950	0.52419	-0.117464	0.017	0.018	1	ENSMUST00000135806	ENSMUSG00000058925	protein_coding	gap	chr18-57594136-57730714	0
1700011I03Rik	chr18-57671196-57671696	0.293752	0.237721	0.018	0.015	1	ENSMUST00000135806	ENSMUSG00000058925	protein_coding	gap	chr18-57594136-57730714	0
1700011L22Rik	chr8-79209569-79210069	0.0175971	-0.514922	0.014	0.019	1	ENSMUST00000034109	ENSMUSG00000031682	protein_coding	utr	chr8-79210430-79210649	360
1700011M02Rik	chrX-102958871-102959371	0.703795	0.113716	0.01	0.008	1	ENSMUST00000113602	ENSMUSG00000079476	protein_coding	utr	chrX-102909567-102909651	49219
1700011M02Rik	chrX-103026261-103026761	0.451383	0.148274	0.022	0.02	1	ENSMUST00000113602	ENSMUSG00000079476	protein_coding	utr	chrX-102909567-102909651	116609
1700011M02Rik	chrX-102933376-102933876	0.3501	0.227049	0.015	0.014	1	ENSMUST00000113602	ENSMUSG00000079476	protein_coding	utr	chrX-102909567-102909651	23724
1700011M02Rik	chrX-102933973-102934473	0.0145927	0.247548	0.079	0.065	1	ENSMUST00000113602	ENSMUSG00000079476	protein_coding	utr	chrX-102909567-102909651	24321
1700012A03Rik	chr6-32016791-32017291	0.429573	-0.112276	0.029	0.031	1	ENSMUST00000031778	ENSMUSG00000029766	protein_coding	exon	chr6-32050246-32050371	32954
1700012A03Rik	chr6-32017671-32018171	0.020963	0.219127	0.095	0.082	1	ENSMUST00000031778	ENSMUSG00000029766	protein_coding	exon	chr6-32050246-32050371	32074
1700012B07Rik	chr11-109758729-109759229	0.0437871	-0.154994	0.096	0.108	1	ENSMUST00000106674	ENSMUSG00000020617	protein_coding	utr	chr11-109787651-109788713	28421
1700012B07Rik	chr11-109769037-109769537	0.181281	-0.131795	0.061	0.063	1	ENSMUST00000106674	ENSMUSG00000020617	protein_coding	utr	chr11-109787651-109788713	18113
1700012B07Rik	chr11-109803705-109804205	0.0270473	-0.679	0.006	0.01	1	ENSMUST00000143578	ENSMUSG00000020617	protein_coding	gap	chr11-109797412-109813558	0
1700012B07Rik	chr11-109818476-109818976	0.0689944	-0.374132	0.014	0.018	1	ENSMUST00000106674	ENSMUSG00000020617	protein_coding	gap	chr11-109813747-109827837	0
1700012B07Rik	chr11-109831442-109831942	0.0374484	-0.146778	0.115	0.124	1	ENSMUST00000106674	ENSMUSG00000020617	protein_coding	exon	chr11-109827838-109828046	3395
1700012B07Rik	chr11-109834158-109834658	0.00113417	-0.375841	0.045	0.058	1	ENSMUST00000106674	ENSMUSG00000020617	protein_coding	exon	chr11-109827838-109828046	6111
1700012I11Rik	chr15-67174444-67174944	0.0654968	0.241769	0.049	0.043	1	ENSMUST00000187233	ENSMUSG00000102069	lincRNA	exon	chr15-67226769-67227080	51824
1700012I11Rik	chr15-67175118-67175618	0.64229	-0.113653	0.009	0.011	1	ENSMUST00000187233	ENSMUSG00000102069	lincRNA	exon	chr15-67226769-67227080	51150
1700012I11Rik	chr15-67175951-67176451	0.374623	-0.171816	0.018	0.018	1	ENSMUST00000187233	ENSMUSG00000102069	lincRNA	exon	chr15-67226769-67227080	50317
1700012I11Rik	chr15-67229302-67229802	0.000992289	0.283279	0.108	0.089	1	ENSMUST00000187233	ENSMUSG00000102069	lincRNA	gap	chr15-67227081-67239642	0
1700012I11Rik	chr15-67245471-67245971	0.261167	0.132239	0.064	0.057	1	ENSMUST00000187233	ENSMUSG00000102069	lincRNA	gap	chr15-67239723-67251169	0
1700012I11Rik	chr15-67689060-67689560	0.0362584	0.311139	0.039	0.03	1	ENSMUST00000187233	ENSMUSG00000102069	lincRNA	exon	chr15-67376912-67377094	311965
1700013G24Rik	chr4-137443551-137444051	0.332039	0.191828	0.022	0.019	1	ENSMUST00000048893	ENSMUSG00000041399	protein_coding	exon	chr4-137453284-137453355	9232
1700013G24Rik	chr4-137449655-137450155	0.0746711	0.22786	0.048	0.043	1	ENSMUST00000048893	ENSMUSG00000041399	protein_coding	exon	chr4-137453284-137453355	3128
1700013N06Rik	chr12-106839460-106839960	0.124793	-0.201309	0.037	0.042	1	ENSMUST00000156376	ENSMUSG00000085801	lincRNA	gap	chr12-106838853-106866266	0
1700015F17Rik	chr5-5481602-5482102	0.625138	0.105923	0.019	0.017	1	ENSMUST00000115447	ENSMUSG00000079666	protein_coding	exon	chr5-5478866-5479143	2458
1700015G11Rik	chr7-52017855-52018355	0.0181558	-0.145373	0.137	0.149	1	ENSMUST00000180038	ENSMUSG00000094445	protein_coding	exon	chr7-52015638-52015728	2126
1700015G11Rik	chr7-52037879-52038379	0.125062	0.279093	0.024	0.02	1	ENSMUST00000180038	ENSMUSG00000094445	protein_coding	exon	chr7-52015638-52015728	22150
1700015G11Rik	chr7-52391749-52392249	0.457904	0.143322	0.022	0.019	1	ENSMUST00000180038	ENSMUSG00000094445	protein_coding	exon	chr7-52015638-52015728	376020
1700015G11Rik	chr7-52736582-52737082	0.0752408	0.265942	0.036	0.031	1	ENSMUST00000180038	ENSMUSG00000094445	protein_coding	exon	chr7-52015638-52015728	720853
1700016G22Rik	chr13-5713060-5713560	0.401773	-0.129048	0.027	0.028	1	ENSMUST00000186843	ENSMUSG00000100625	lincRNA	exon	chr13-5855508-5855951	141947
1700016G22Rik	chr13-5714105-5714605	0.444787	0.155472	0.022	0.019	1	ENSMUST00000186843	ENSMUSG00000100625	lincRNA	exon	chr13-5855508-5855951	140902
1700016G22Rik	chr13-5728738-5729238	0.119209	0.2417	0.036	0.03	1	ENSMUST00000186843	ENSMUSG00000100625	lincRNA	exon	chr13-5855508-5855951	126269
1700016G22Rik	chr13-5802201-5802701	0.0230551	0.728855	0.01	0.006	1	ENSMUST00000186843	ENSMUSG00000100625	lincRNA	exon	chr13-5855508-5855951	52806
1700016G22Rik	chr13-5803502-5804002	0.0699387	0.5423	0.01	0.007	1	ENSMUST00000186843	ENSMUSG00000100625	lincRNA	exon	chr13-5855508-5855951	51505
1700016H13Rik	chr5-103655188-103655688	0.150669	0.243992	0.029	0.024	1	ENSMUST00000154408	ENSMUSG00000029320	protein_coding	utr	chr5-103655604-103655723	0
1700016L21Rik	chr1-80486334-80486834	0.495709	-0.105425	0.025	0.027	1	ENSMUST00000189139	ENSMUSG00000101483	lincRNA	exon	chr1-80479369-80479867	6466
1700016P03Rik	chr11-75172271-75172771	0.456306	0.227513	0.01	0.009	1	ENSMUST00000134252	ENSMUSG00000085609	processed_transcript	gap	chr11-75172598-75173977	0
1700016P03Rik	chr11-75172930-75173430	0.0911521	-0.132519	0.092	0.098	1	ENSMUST00000134252	ENSMUSG00000085609	processed_transcript	gap	chr11-75172598-75173977	0
1700017B05Rik	chr9-57255128-57255628	0.0619466	-0.308537	0.025	0.029	1	ENSMUST00000034846	ENSMUSG00000032300	protein_coding	gap	chr9-57254330-57256385	0
1700017B05Rik	chr9-57257592-57258092	1.42153e-05	-0.242973	0.171	0.196	1	ENSMUST00000034846	ENSMUSG00000032300	protein_coding	cds	chr9-57256386-57259089	0
1700017D01Rik	chr19-11120950-11121450	0.309528	-0.122185	0.042	0.043	1	ENSMUST00000025635	ENSMUSG00000024729	protein_coding	gap	chr19-11116517-11130485	0
1700017G19Rik	chr3-40167894-40168394	0.100064	0.408921	0.014	0.011	1	ENSMUST00000035860	ENSMUSG00000037884	lincRNA	exon	chr3-40504867-40506013	336472
1700017G19Rik	chr3-40070243-40070743	0.00103919	0.449219	0.046	0.035	1	ENSMUST00000035860	ENSMUSG00000037884	lincRNA	exon	chr3-40504867-40506013	434123
1700017G19Rik	chr3-40091955-40092455	0.111177	0.160122	0.085	0.076	1	ENSMUST00000035860	ENSMUSG00000037884	lincRNA	exon	chr3-40504867-40506013	412411
1700017G19Rik	chr3-40102652-40103152	0.125247	-0.229559	0.028	0.032	1	ENSMUST00000035860	ENSMUSG00000037884	lincRNA	exon	chr3-40504867-40506013	401714
1700017G19Rik	chr3-40326309-40326809	0.0113124	-0.562907	0.012	0.017	1	ENSMUST00000035860	ENSMUSG00000037884	lincRNA	exon	chr3-40504867-40506013	178057
1700017G19Rik	chr3-40409032-40409532	0.0341894	-0.241932	0.049	0.054	1	ENSMUST00000035860	ENSMUSG00000037884	lincRNA	exon	chr3-40504867-40506013	95334
1700017G19Rik	chr3-40467164-40467664	0.0532755	-0.183667	0.067	0.078	1	ENSMUST00000035860	ENSMUSG00000037884	lincRNA	exon	chr3-40504867-40506013	37202
1700017G19Rik	chr3-40523243-40523743	0.0344372	0.469398	0.018	0.012	1	ENSMUST00000035860	ENSMUSG00000037884	lincRNA	exon	chr3-40522615-40522912	330
1700017J07Rik	chr2-168978855-168979355	0.40966	-0.156169	0.015	0.017	1	ENSMUST00000140241	ENSMUSG00000086348	lincRNA	exon	chr2-168978727-168978906	0
1700017J07Rik	chr2-168979631-168980131	0.0292855	0.580377	0.013	0.008	1	ENSMUST00000140241	ENSMUSG00000086348	lincRNA	exon	chr2-168978727-168978906	724
1700017J07Rik	chr2-168980771-168981271	0.000608571	0.369575	0.073	0.056	1	ENSMUST00000140241	ENSMUSG00000086348	lincRNA	exon	chr2-168978727-168978906	1864
1700017N19Rik	chr10-100742009-100742509	0.172658	0.192862	0.04	0.034	1	ENSMUST00000190708	ENSMUSG00000056912	protein_coding	utr	chr10-100618102-100618401	123607
1700017N19Rik	chr10-100865446-100865946	0.000688164	-0.265643	0.098	0.116	1	ENSMUST00000190708	ENSMUSG00000056912	protein_coding	utr	chr10-100618102-100618401	247044
1700017N19Rik	chr10-100868282-100868782	0.197244	-0.175902	0.032	0.037	1	ENSMUST00000190708	ENSMUSG00000056912	protein_coding	utr	chr10-100618102-100618401	249880
1700018C11Rik	chr4-63606271-63606771	0.413258	-0.154297	0.018	0.019	1	ENSMUST00000102862	ENSMUSG00000058935	protein_coding	utr	chr4-63607089-63607311	317
1700019D03Rik	chr1-52949902-52950402	0.0082963	0.612675	0.017	0.011	1	ENSMUST00000191441	ENSMUSG00000043629	protein_coding	gap	chr1-52925735-53020093	0
1700019D03Rik	chr1-52952007-52952507	0.230408	0.172255	0.043	0.038	1	ENSMUST00000191441	ENSMUSG00000043629	protein_coding	gap	chr1-52925735-53020093	0
1700019D03Rik	chr1-52953020-52953520	0.348945	-0.142742	0.029	0.028	1	ENSMUST00000114492	ENSMUSG00000043629	protein_coding	utr	chr1-52953197-52953350	0
1700019D03Rik	chr1-52955104-52955604	0.032971	0.238507	0.065	0.054	1	ENSMUST00000191441	ENSMUSG00000043629	protein_coding	gap	chr1-52925735-53020093	0
1700019D03Rik	chr1-52956695-52957195	0.0403265	-0.107949	0.186	0.204	1	ENSMUST00000191441	ENSMUSG00000043629	protein_coding	gap	chr1-52925735-53020093	0
1700019D03Rik	chr1-53017156-53017656	0.0656953	0.327077	0.027	0.022	1	ENSMUST00000191441	ENSMUSG00000043629	protein_coding	gap	chr1-52925735-53020093	0
1700019D03Rik	chr1-53032499-53032999	0.0133707	0.409196	0.03	0.022	1	ENSMUST00000191441	ENSMUSG00000043629	protein_coding	exon	chr1-53020094-53020179	12319
1700019E08Rik	chr2-45581003-45581503	0.328787	0.189367	0.023	0.02	1	ENSMUST00000153567	ENSMUSG00000086202	lincRNA	exon	chr2-45696605-45696629	115101
1700019E08Rik	chr2-45678670-45679170	0.51689	0.140052	0.019	0.017	1	ENSMUST00000153567	ENSMUSG00000086202	lincRNA	exon	chr2-45696605-45696629	17434
1700019G17Rik	chr6-85896327-85896827	0.224323	-0.195951	0.024	0.026	1	ENSMUST00000159755	ENSMUSG00000068299	protein_coding	utr	chr6-85899051-85899207	2223
1700019G17Rik	chr6-85904728-85905228	0.00686209	0.212069	0.123	0.106	1	ENSMUST00000095757	ENSMUSG00000068299	protein_coding	utr	chr6-85904712-85904884	0
1700019G17Rik	chr6-85905613-85906113	0.0138054	-0.38223	0.028	0.033	1	ENSMUST00000095757	ENSMUSG00000068299	protein_coding	exon	chr6-85904712-85904884	728
1700019G17Rik	chr6-85906195-85906695	0.169645	0.155689	0.07	0.067	1	ENSMUST00000095757	ENSMUSG00000068299	protein_coding	exon	chr6-85904712-85904884	1310
1700019L03Rik	chr2-32784217-32784717	0.413442	-0.119101	0.027	0.029	1	ENSMUST00000102813	ENSMUSG00000038987	protein_coding	cds	chr2-32784221-32784387	0
1700019N19Rik	chr19-58781565-58782065	0.145723	-0.393036	0.009	0.01	1	ENSMUST00000028299	ENSMUSG00000026931	protein_coding	utr	chr19-58785803-58785995	3737
1700019O17Rik	chr1-86421547-86422047	0.108232	0.496524	0.01	0.007	1	ENSMUST00000046004	ENSMUSG00000036574	protein_coding	exon	chr1-86426329-86428052	4281
1700019O17Rik	chr1-86424606-86425106	0.30792	-0.201091	0.017	0.018	1	ENSMUST00000046004	ENSMUSG00000036574	protein_coding	exon	chr1-86426329-86428052	1222
1700019O17Rik	chr1-86435347-86435847	0.00422003	0.257312	0.101	0.086	1	ENSMUST00000046004	ENSMUSG00000036574	protein_coding	utr	chr1-86427964-86428052	7294
1700019O17Rik	chr1-86442391-86442891	0.0170598	0.106527	0.322	0.3	1	ENSMUST00000046004	ENSMUSG00000036574	protein_coding	utr	chr1-86427964-86428052	14338
1700019O17Rik	chr1-86443716-86444216	0.687345	0.106919	0.015	0.013	1	ENSMUST00000046004	ENSMUSG00000036574	protein_coding	utr	chr1-86427964-86428052	15663
1700019O17Rik	chr1-86472097-86472597	0.198628	0.22824	0.028	0.023	1	ENSMUST00000046004	ENSMUSG00000036574	protein_coding	utr	chr1-86427964-86428052	44044
1700020I14Rik	chr2-119594669-119595169	0.331522	-0.133065	0.033	0.035	1	ENSMUST00000153581	ENSMUSG00000085438	lincRNA	gap	chr2-119594435-119596258	0
1700020L24Rik	chr11-83440273-83440773	0.115167	0.123896	0.13	0.117	1	ENSMUST00000188702	ENSMUSG00000035085	protein_coding	cds	chr11-83440287-83440600	0
1700020M21Rik	chr9-120869596-120870096	0.153836	0.163095	0.067	0.06	1	ENSMUST00000188320	ENSMUSG00000100146	lincRNA	exon	chr9-120913774-120914090	43677
1700020M21Rik	chr9-120869044-120869544	0.218594	0.272279	0.02	0.015	1	ENSMUST00000188320	ENSMUSG00000100146	lincRNA	exon	chr9-120913774-120914090	44229
1700020M21Rik	chr9-120804757-120805257	0.517995	0.181012	0.011	0.01	1	ENSMUST00000188320	ENSMUSG00000100146	lincRNA	exon	chr9-120913774-120914090	108516
1700020M21Rik	chr9-120855585-120856085	0.2584	-0.162643	0.03	0.032	1	ENSMUST00000188320	ENSMUSG00000100146	lincRNA	exon	chr9-120913774-120914090	57688
1700020N01Rik	chr10-21636670-21637170	0.00670926	0.78637	0.013	0.007	1	ENSMUST00000057341	ENSMUSG00000050844	protein_coding	utr	chr10-21621726-21622376	14293
1700020N01Rik	chr10-21652190-21652690	0.0764809	0.492121	0.015	0.009	1	ENSMUST00000057341	ENSMUSG00000050844	protein_coding	utr	chr10-21621726-21622376	29813
1700021A07Rik	chr10-21465318-21465818	0.243699	-0.121086	0.053	0.055	1	ENSMUST00000188024	ENSMUSG00000037535	lincRNA	exon	chr10-21426418-21426565	38752
1700021A07Rik	chr10-21467327-21467827	0.2054	-0.304572	0.011	0.013	1	ENSMUST00000188024	ENSMUSG00000037535	lincRNA	exon	chr10-21426418-21426565	40761
1700021F07Rik	chr2-173546279-173546779	0.0412214	-0.234537	0.043	0.051	1	ENSMUST00000029023	ENSMUSG00000027518	protein_coding	utr	chr2-173528345-173528501	17777
1700021K19Rik	chr16-32858767-32859267	0.016686	0.730237	0.011	0.007	1	ENSMUST00000119810	ENSMUSG00000035629	protein_coding	gap	chr16-32857046-32877262	0
1700022H16Rik	chr12-9569845-9570345	0.141465	-0.247897	0.022	0.025	1	ENSMUST00000188935	ENSMUSG00000099360	lincRNA	gap	chr12-9565570-9570205	0
1700023C21Rik	chr11-109844243-109844743	0.459421	0.218442	0.01	0.008	1	ENSMUST00000143247	ENSMUSG00000087393	lincRNA	exon	chr11-109845878-109846065	1134
1700023C21Rik	chr11-109850144-109850644	0.00388614	-0.281106	0.065	0.077	1	ENSMUST00000143247	ENSMUSG00000087393	lincRNA	exon	chr11-109848317-109848476	1667
1700023C21Rik	chr11-109851988-109852488	0.00207533	-0.408303	0.033	0.044	1	ENSMUST00000143247	ENSMUSG00000087393	lincRNA	exon	chr11-109848317-109848476	3511
1700023C21Rik	chr11-109853080-109853580	0.0369254	-0.57441	0.008	0.012	1	ENSMUST00000143247	ENSMUSG00000087393	lincRNA	exon	chr11-109848317-109848476	4603
1700023C21Rik	chr11-109860548-109861048	0.101053	0.135976	0.116	0.105	1	ENSMUST00000143247	ENSMUSG00000087393	lincRNA	exon	chr11-109848317-109848476	12071
1700023C21Rik	chr11-109863273-109863773	0.138116	0.255792	0.028	0.023	1	ENSMUST00000143247	ENSMUSG00000087393	lincRNA	exon	chr11-109848317-109848476	14796
1700023C21Rik	chr11-109868823-109869323	0.432231	0.110265	0.045	0.043	1	ENSMUST00000143247	ENSMUSG00000087393	lincRNA	exon	chr11-109848317-109848476	20346
1700023E05Rik	chr5-77015759-77016259	0.384673	0.119599	0.048	0.044	1	ENSMUST00000117880	ENSMUSG00000029248	protein_coding	cds	chr5-77016152-77016638	0
1700023E05Rik	chr5-77056784-77057284	0.0226814	-0.533218	0.011	0.015	1	ENSMUST00000117880	ENSMUSG00000029248	protein_coding	gap	chr5-77056084-77059353	0
1700023E05Rik	chr5-77061314-77061814	0.00271227	0.371075	0.052	0.042	1	ENSMUST00000117880	ENSMUSG00000029248	protein_coding	utr	chr5-77061417-77061529	0
1700023F02Rik	chr10-66270839-66271339	0.143126	0.244064	0.031	0.026	1	ENSMUST00000189619	ENSMUSG00000100000	lincRNA	exon	chr10-66254162-66254223	16615
1700023F02Rik	chr10-66357703-66358203	0.259542	0.100311	0.104	0.1	1	ENSMUST00000189619	ENSMUSG00000100000	lincRNA	exon	chr10-66254162-66254223	103479
1700023F06Rik	chr11-103201567-103202067	0.0392264	0.141244	0.157	0.146	1	ENSMUST00000174567	ENSMUSG00000020940	protein_coding	cds	chr11-103201717-103201762	0
1700023H06Rik	chr13-80884595-80885095	0.00133395	-0.219054	0.121	0.141	1	ENSMUST00000161006	ENSMUSG00000089827	processed_transcript	gap	chr13-80884895-80885151	0
1700023L04Rik	chr6-29985060-29985560	0.234468	0.146967	0.056	0.048	1	ENSMUST00000141679	ENSMUSG00000045709	lincRNA	gap	chr6-29985467-29993011	0
1700024G13Rik	chr14-32388161-32388661	0.519008	0.117797	0.027	0.023	1	ENSMUST00000100723	ENSMUSG00000072473	protein_coding	cds	chr14-32388256-32388352	0
1700024P04Rik	chr13-99018836-99019336	0.0544403	0.320958	0.03	0.025	1	ENSMUST00000054425	ENSMUSG00000045022	protein_coding	exon	chr13-98984085-98984565	34270
1700024P16Rik	chr4-104990601-104991101	1.56702e-05	-0.729473	0.02	0.031	1	ENSMUST00000106804	ENSMUSG00000078612	protein_coding	gap	chr4-104990358-104995697	0
1700025D23Rik	chr11-114093139-114093639	0.127909	-0.380939	0.01	0.012	1	ENSMUST00000129365	ENSMUSG00000086760	lincRNA	gap	chr11-114091871-114094955	0
1700025D23Rik	chr11-114096737-114097237	0.415674	-0.192144	0.011	0.012	1	ENSMUST00000129365	ENSMUSG00000086760	lincRNA	exon	chr11-114094956-114095336	1400
1700025D23Rik	chr11-114146190-114146690	0.251402	0.310476	0.012	0.009	1	ENSMUST00000129365	ENSMUSG00000086760	lincRNA	exon	chr11-114094956-114095336	50853
1700025F24Rik	chr10-119363571-119364071	0.62566	0.13741	0.01	0.01	1	ENSMUST00000185238	ENSMUSG00000100558	lincRNA	exon	chr10-119413444-119413619	49372
1700025G04Rik	chr1-151890244-151890744	0.0278639	-0.3309	0.03	0.035	1	ENSMUST00000044581	ENSMUSG00000032666	protein_coding	utr	chr1-151884524-151893393	0
1700025G04Rik	chr1-151944813-151945313	0.421118	0.129912	0.033	0.031	1	ENSMUST00000187603	ENSMUSG00000032666	protein_coding	gap	chr1-151921124-151980425	0
1700025G04Rik	chr1-151926104-151926604	0.284797	0.313371	0.011	0.008	1	ENSMUST00000187603	ENSMUSG00000032666	protein_coding	gap	chr1-151921124-151980425	0
1700025G04Rik	chr1-151974780-151975280	0.598282	-0.131452	0.01	0.01	1	ENSMUST00000187603	ENSMUSG00000032666	protein_coding	gap	chr1-151921124-151980425	0
1700025G04Rik	chr1-151948016-151948516	0.0427306	-0.181526	0.075	0.08	1	ENSMUST00000187603	ENSMUSG00000032666	protein_coding	gap	chr1-151921124-151980425	0
1700025G04Rik	chr1-151953564-151954064	0.551462	0.116935	0.024	0.023	1	ENSMUST00000187603	ENSMUSG00000032666	protein_coding	gap	chr1-151921124-151980425	0
1700025G04Rik	chr1-151932086-151932586	0.0273912	-0.42432	0.017	0.02	1	ENSMUST00000187603	ENSMUSG00000032666	protein_coding	gap	chr1-151921124-151980425	0
1700025G04Rik	chr1-152165329-152165829	0.528383	0.100467	0.037	0.032	1	ENSMUST00000044581	ENSMUSG00000032666	protein_coding	exon	chr1-152089932-152090125	75203
1700025G04Rik	chr1-152089378-152089878	0.414833	0.15145	0.026	0.024	1	ENSMUST00000187603	ENSMUSG00000032666	protein_coding	gap	chr1-152006768-152089931	0
1700025G04Rik	chr1-152219664-152220164	0.336106	-0.154876	0.024	0.025	1	ENSMUST00000044581	ENSMUSG00000032666	protein_coding	exon	chr1-152089932-152090125	129538
1700025G04Rik	chr1-152008386-152008886	0.181108	-0.186945	0.03	0.034	1	ENSMUST00000187603	ENSMUSG00000032666	protein_coding	gap	chr1-152006768-152089931	0
1700025G04Rik	chr1-151881231-151881731	0.00702013	-0.196716	0.111	0.123	1	ENSMUST00000187603	ENSMUSG00000032666	protein_coding	gap	chr1-151854345-151893321	0
1700025G04Rik	chr1-152088837-152089337	0.221468	0.306413	0.016	0.012	1	ENSMUST00000187603	ENSMUSG00000032666	protein_coding	gap	chr1-152006768-152089931	0
1700025G04Rik	chr1-152090616-152091116	0.28007	0.150354	0.048	0.043	1	ENSMUST00000044581	ENSMUSG00000032666	protein_coding	exon	chr1-152089932-152090125	490
1700025H01Rik	chr16-30172728-30173228	0.318406	0.169268	0.03	0.026	1	ENSMUST00000187479	ENSMUSG00000101888	lincRNA	exon	chr16-30195071-30195249	21842
1700025H01Rik	chr16-30174163-30174663	0.0882889	-0.13785	0.09	0.094	1	ENSMUST00000187479	ENSMUSG00000101888	lincRNA	exon	chr16-30195071-30195249	20407
1700025H01Rik	chr16-30185534-30186034	0.233817	-0.327194	0.009	0.01	1	ENSMUST00000187479	ENSMUSG00000101888	lincRNA	exon	chr16-30195071-30195249	9036
1700025K24Rik	chr17-54343383-54343883	0.343079	0.27412	0.01	0.008	1	ENSMUST00000190635	ENSMUSG00000099747	lincRNA	exon	chr17-54352583-54353077	8699
1700025K24Rik	chr17-54662802-54663302	0.546129	-0.103153	0.02	0.022	1	ENSMUST00000190635	ENSMUSG00000099747	lincRNA	exon	chr17-54369926-54370074	292727
1700025M24Rik	chr5-73279730-73280230	0.596151	-0.137975	0.009	0.01	1	ENSMUST00000191524	ENSMUSG00000100175	lincRNA	gap	chr5-73271795-73282056	0
1700025O08Rik	chr4-22964929-22965429	0.282685	0.259374	0.014	0.011	1	ENSMUST00000123729	ENSMUSG00000028244	lincRNA	exon	chr4-22938127-22938435	26493
1700026D08Rik	chr7-83794686-83795186	0.0441016	0.214696	0.069	0.06	1	ENSMUST00000119134	ENSMUSG00000011154	protein_coding	cds	chr7-83794742-83794810	0
1700026D08Rik	chr7-83802493-83802993	0.529746	0.101665	0.033	0.031	1	ENSMUST00000011298	ENSMUSG00000011154	protein_coding	exon	chr7-83794742-83794880	7612
1700026D08Rik	chr7-83809069-83809569	0.0931295	-0.183471	0.053	0.059	1	ENSMUST00000011298	ENSMUSG00000011154	protein_coding	exon	chr7-83794742-83794880	14188
1700026D08Rik	chr7-83813899-83814399	0.0279412	0.427605	0.024	0.017	1	ENSMUST00000011298	ENSMUSG00000011154	protein_coding	exon	chr7-83794742-83794880	19018
1700026D08Rik	chr7-83814413-83814913	0.489252	0.165685	0.015	0.013	1	ENSMUST00000011298	ENSMUSG00000011154	protein_coding	exon	chr7-83794742-83794880	19532
1700026D08Rik	chr7-83828555-83829055	0.000108586	-0.403757	0.054	0.071	1	ENSMUST00000011298	ENSMUSG00000011154	protein_coding	exon	chr7-83794742-83794880	33674
1700026D08Rik	chr7-83831148-83831648	0.283648	0.207036	0.023	0.02	1	ENSMUST00000011298	ENSMUSG00000011154	protein_coding	exon	chr7-83794742-83794880	36267
1700026J12Rik	chr16-49260690-49261190	0.288823	-0.20458	0.016	0.02	1	ENSMUST00000098226	ENSMUSG00000073976	lincRNA	exon	chr16-49255699-49255772	4917
1700026J12Rik	chr16-49262961-49263461	0.244856	-0.132775	0.047	0.052	1	ENSMUST00000098226	ENSMUSG00000073976	lincRNA	exon	chr16-49255699-49255772	7188
1700026J14Rik	chr6-48529805-48530305	0.00420325	-0.284195	0.066	0.073	1	ENSMUST00000180937	ENSMUSG00000097716	lincRNA	exon	chr6-48536582-48536736	6276
1700026L06Rik	chr2-28699142-28699642	0.556475	-0.133285	0.011	0.014	1	ENSMUST00000124840	ENSMUSG00000026809	protein_coding	utr	chr2-28699582-28699683	0
1700027F09Rik	chr5-64452568-64453068	0.482671	-0.15012	0.013	0.015	1	ENSMUST00000185829	ENSMUSG00000100911	lincRNA	exon	chr5-64454806-64455285	1737
1700027F09Rik	chr5-64422664-64423164	0.624752	0.117495	0.016	0.014	1	ENSMUST00000185829	ENSMUSG00000100911	lincRNA	exon	chr5-64454806-64455285	31641
1700027F09Rik	chr5-64428815-64429315	0.0926021	0.264389	0.033	0.027	1	ENSMUST00000185829	ENSMUSG00000100911	lincRNA	exon	chr5-64454806-64455285	25490
1700027F09Rik	chr5-64448602-64449102	0.0360205	-0.396851	0.017	0.022	1	ENSMUST00000185829	ENSMUSG00000100911	lincRNA	exon	chr5-64454806-64455285	5703
1700027F09Rik	chr5-64477792-64478292	0.0795738	0.274521	0.036	0.03	1	ENSMUST00000190640	ENSMUSG00000100911	lincRNA	exon	chr5-64467794-64467946	9845
1700027F09Rik	chr5-64500802-64501302	0.00778601	-0.501865	0.018	0.023	1	ENSMUST00000190640	ENSMUSG00000100911	lincRNA	exon	chr5-64467794-64467946	32855
1700027F09Rik	chr5-64503431-64503931	0.0926264	-0.241978	0.029	0.036	1	ENSMUST00000190640	ENSMUSG00000100911	lincRNA	exon	chr5-64467794-64467946	35484
1700027F09Rik	chr5-64505148-64505648	0.228312	0.16751	0.043	0.039	1	ENSMUST00000190640	ENSMUSG00000100911	lincRNA	exon	chr5-64467794-64467946	37201
1700027F09Rik	chr5-64508519-64509019	0.38556	0.262527	0.01	0.008	1	ENSMUST00000190640	ENSMUSG00000100911	lincRNA	exon	chr5-64467794-64467946	40572
1700027F09Rik	chr5-64513517-64514017	0.00189341	0.413729	0.047	0.035	1	ENSMUST00000190640	ENSMUSG00000100911	lincRNA	exon	chr5-64467794-64467946	45570
1700027F09Rik	chr5-64579650-64580150	0.189922	0.209772	0.034	0.029	1	ENSMUST00000190640	ENSMUSG00000100911	lincRNA	exon	chr5-64467794-64467946	111703
1700027I24Rik	chr9-36680652-36681152	5.16279e-06	1.37847	0.012	0.005	1	ENSMUST00000183612	ENSMUSG00000098304	lincRNA	gap	chr9-36669072-36689408	0
1700027I24Rik	chr9-36681304-36681804	0.265292	0.182089	0.031	0.027	1	ENSMUST00000183612	ENSMUSG00000098304	lincRNA	gap	chr9-36669072-36689408	0
1700028D13Rik	chr5-112132726-112133226	0.156934	-0.113259	0.088	0.089	1	ENSMUST00000186834	ENSMUSG00000101683	lincRNA	exon	chr5-112206763-112206971	73536
1700028D13Rik	chr5-112133628-112134128	0.00267255	-0.14127	0.225	0.239	1	ENSMUST00000186834	ENSMUSG00000101683	lincRNA	exon	chr5-112206763-112206971	72634
1700028D13Rik	chr5-112153619-112154119	0.375723	0.100943	0.068	0.065	1	ENSMUST00000186834	ENSMUSG00000101683	lincRNA	exon	chr5-112206763-112206971	52643
1700028D13Rik	chr5-112210050-112210550	0.486269	-0.121009	0.018	0.02	1	ENSMUST00000187272	ENSMUSG00000101683	lincRNA	exon	chr5-112209767-112210004	45
1700028I16Rik	chr10-82811792-82812292	0.0206191	0.189366	0.111	0.099	1	ENSMUST00000076984	ENSMUSG00000056821	lincRNA	gap	chr10-82812293-82812296	0
1700028I16Rik	chr10-82826442-82826942	0.163824	0.330368	0.015	0.013	1	ENSMUST00000178540	ENSMUSG00000056821	lincRNA	exon	chr10-82823517-82824242	2199
1700028K03Rik	chr5-107513543-107514043	0.403281	0.17234	0.021	0.018	1	ENSMUST00000160160	ENSMUSG00000089798	protein_coding	gap	chr5-107509123-107539129	0
1700028K03Rik	chr5-107541555-107542055	0.422937	-0.179795	0.013	0.015	1	ENSMUST00000163064	ENSMUSG00000089798	protein_coding	gap	chr5-107541162-107543919	0
1700028N14Rik	chr11-103265152-103265652	0.0247886	0.503469	0.018	0.012	1	ENSMUST00000139621	ENSMUSG00000078635	processed_transcript	gap	chr11-103265399-103267337	0
1700028N14Rik	chr11-103268157-103268657	0.0358959	-0.480393	0.012	0.017	1	ENSMUST00000139621	ENSMUSG00000078635	processed_transcript	exon	chr11-103267338-103267745	411
1700028N14Rik	chr11-103271917-103272417	0.0353144	0.369562	0.027	0.021	1	ENSMUST00000139621	ENSMUSG00000078635	processed_transcript	exon	chr11-103267338-103267745	4171
1700028N14Rik	chr11-103288282-103288782	0.173171	0.246997	0.028	0.023	1	ENSMUST00000139621	ENSMUSG00000078635	processed_transcript	exon	chr11-103267338-103267745	20536
1700028N14Rik	chr11-103291910-103292410	0.415798	0.135466	0.034	0.03	1	ENSMUST00000139621	ENSMUSG00000078635	processed_transcript	exon	chr11-103267338-103267745	24164
1700028P14Rik	chr19-23533045-23533545	0.0404754	0.59837	0.011	0.007	1	ENSMUST00000035849	ENSMUSG00000033053	protein_coding	utr	chr19-23558760-23558854	25214
1700028P14Rik	chr19-23545563-23546063	0.0122197	0.504191	0.021	0.014	1	ENSMUST00000035849	ENSMUSG00000033053	protein_coding	utr	chr19-23558760-23558854	12696
1700028P14Rik	chr19-23652592-23653092	0.0658062	0.197675	0.067	0.059	1	ENSMUST00000035849	ENSMUSG00000033053	protein_coding	cds	chr19-23652575-23652726	0
1700028P14Rik	chr19-23507171-23507671	0.318907	0.167294	0.032	0.027	1	ENSMUST00000035849	ENSMUSG00000033053	protein_coding	utr	chr19-23558760-23558854	51088
1700028P14Rik	chr19-23523667-23524167	0.249367	-0.112159	0.058	0.063	1	ENSMUST00000035849	ENSMUSG00000033053	protein_coding	utr	chr19-23558760-23558854	34592
1700028P14Rik	chr19-23532535-23533035	0.420313	0.154457	0.025	0.022	1	ENSMUST00000035849	ENSMUSG00000033053	protein_coding	utr	chr19-23558760-23558854	25724
1700028P15Rik	chr2-171822088-171822588	0.295864	-0.140449	0.033	0.036	1	ENSMUST00000139894	ENSMUSG00000086823	processed_transcript	exon	chr2-171956879-171957159	134290
1700028P15Rik	chr2-171839999-171840499	0.0524944	0.332339	0.03	0.023	1	ENSMUST00000139894	ENSMUSG00000086823	processed_transcript	exon	chr2-171956879-171957159	116379
1700028P15Rik	chr2-171846983-171847483	0.465839	0.122155	0.031	0.029	1	ENSMUST00000139894	ENSMUSG00000086823	processed_transcript	exon	chr2-171956879-171957159	109395
1700028P15Rik	chr2-171847495-171847995	0.271839	-0.242667	0.014	0.016	1	ENSMUST00000139894	ENSMUSG00000086823	processed_transcript	exon	chr2-171956879-171957159	108883
1700028P15Rik	chr2-171942602-171943102	0.023973	0.410904	0.027	0.019	1	ENSMUST00000139894	ENSMUSG00000086823	processed_transcript	exon	chr2-171956879-171957159	13776
1700029E06Rik	chr5-58736540-58737040	0.0702029	0.25314	0.041	0.035	1	ENSMUST00000189036	ENSMUSG00000100557	lincRNA	exon	chr5-58454651-58455292	281247
1700029F12Rik	chr13-97007354-97007854	0.513385	-0.101334	0.024	0.025	1	ENSMUST00000091377	ENSMUSG00000052075	protein_coding	utr	chr13-97021864-97022450	14009
1700029F12Rik	chr13-97008132-97008632	0.356324	0.105895	0.065	0.062	1	ENSMUST00000091377	ENSMUSG00000052075	protein_coding	utr	chr13-97021864-97022450	13231
1700029H14Rik	chr8-13530877-13531377	0.440318	0.146884	0.026	0.023	1	ENSMUST00000187391	ENSMUSG00000031452	protein_coding	utr	chr8-13550733-13551118	19355
1700029H14Rik	chr8-13537640-13538140	0.58611	0.151737	0.012	0.011	1	ENSMUST00000187391	ENSMUSG00000031452	protein_coding	utr	chr8-13550733-13551118	12592
1700029H14Rik	chr8-13528759-13529259	0.50722	0.171197	0.013	0.012	1	ENSMUST00000187391	ENSMUSG00000031452	protein_coding	utr	chr8-13550733-13551118	21473
1700029H14Rik	chr8-13529292-13529792	0.238989	-0.13215	0.052	0.053	1	ENSMUST00000187391	ENSMUSG00000031452	protein_coding	utr	chr8-13550733-13551118	20940
1700029H14Rik	chr8-13529810-13530310	0.00291721	-0.136255	0.238	0.256	1	ENSMUST00000187391	ENSMUSG00000031452	protein_coding	utr	chr8-13550733-13551118	20422
1700029H14Rik	chr8-13548134-13548634	0.0383114	-0.168716	0.087	0.096	1	ENSMUST00000187391	ENSMUSG00000031452	protein_coding	utr	chr8-13550733-13551118	2098
1700029H14Rik	chr8-13548756-13549256	0.000667463	-0.342514	0.059	0.073	1	ENSMUST00000187391	ENSMUSG00000031452	protein_coding	utr	chr8-13550733-13551118	1476
1700029J03Rik	chr16-93379503-93380003	0.470799	0.211015	0.01	0.008	1	ENSMUST00000189879	ENSMUSG00000099968	lincRNA	exon	chr16-93391677-93391840	11673
1700029J03Rik	chr16-93454204-93454704	0.238665	-0.165649	0.03	0.032	1	ENSMUST00000185803	ENSMUSG00000099968	lincRNA	gap	chr16-93397626-93458692	0
1700029J07Rik	chr8-45974039-45974539	0.102852	0.38485	0.015	0.012	1	ENSMUST00000095323	ENSMUSG00000071103	protein_coding	utr	chr8-45973604-45975252	0
1700029M03Rik	chr1-164973696-164974196	0.569118	-0.133907	0.011	0.011	1	ENSMUST00000187300	ENSMUSG00000101189	lincRNA	exon	chr1-164962500-164962825	10870
1700029M03Rik	chr1-164983698-164984198	0.599556	-0.105671	0.016	0.016	1	ENSMUST00000187300	ENSMUSG00000101189	lincRNA	exon	chr1-164962500-164962825	20872
1700029M03Rik	chr1-164988081-164988581	0.0895405	-0.236485	0.033	0.038	1	ENSMUST00000187300	ENSMUSG00000101189	lincRNA	exon	chr1-164962500-164962825	25255
1700029M03Rik	chr1-164988884-164989384	0.0202146	-0.250426	0.051	0.061	1	ENSMUST00000187300	ENSMUSG00000101189	lincRNA	exon	chr1-164962500-164962825	26058
1700029M20Rik	chr4-135656236-135656736	0.336064	0.20767	0.018	0.016	1	ENSMUST00000153347	ENSMUSG00000086788	lincRNA	exon	chr4-135627756-135630198	26037
1700029N11Rik	chr13-44484268-44484768	0.322948	0.298358	0.01	0.008	1	ENSMUST00000182568	ENSMUSG00000098144	lincRNA	exon	chr13-44457441-44457569	26698
1700029N11Rik	chr13-44484914-44485414	0.0289302	-0.15607	0.112	0.123	1	ENSMUST00000182568	ENSMUSG00000098144	lincRNA	exon	chr13-44457441-44457569	27344
1700030C12Rik	chr11-23498457-23498957	0.214976	0.210233	0.033	0.025	1	ENSMUST00000144783	ENSMUSG00000086459	processed_transcript	gap	chr11-23498586-23499385	0
1700030F04Rik	chr6-117652927-117653427	0.170714	-0.151312	0.05	0.055	1	ENSMUST00000190546	ENSMUSG00000099869	lincRNA	gap	chr6-117647764-117702621	0
1700030F04Rik	chr6-117686993-117687493	0.403441	0.179276	0.017	0.016	1	ENSMUST00000190546	ENSMUSG00000099869	lincRNA	gap	chr6-117647764-117702621	0
1700030F04Rik	chr6-117758472-117758972	0.401461	0.193789	0.015	0.013	1	ENSMUST00000187642	ENSMUSG00000099869	lincRNA	exon	chr6-117751676-117751769	6702
1700030J22Rik	chr8-116980078-116980578	0.0417917	0.2872	0.041	0.034	1	ENSMUST00000070577	ENSMUSG00000031847	protein_coding	exon	chr8-116978779-116978943	1134
1700030O20Rik	chr10-116713338-116713838	0.568638	0.157585	0.011	0.011	1	ENSMUST00000185546	ENSMUSG00000100198	lincRNA	exon	chr10-116723067-116723256	9228
1700031L13Rik	chr5-82288304-82288804	0.0642187	0.318058	0.029	0.023	1	ENSMUST00000185410	ENSMUSG00000099863	lincRNA	exon	chr5-82124596-82124713	163590
1700031L13Rik	chr5-82346628-82347128	0.143034	-0.184023	0.039	0.041	1	ENSMUST00000185410	ENSMUSG00000099863	lincRNA	exon	chr5-82124596-82124713	221914
1700031P21Rik	chr12-52635415-52635915	0.120118	0.397715	0.013	0.01	1	ENSMUST00000187526	ENSMUSG00000100315	lincRNA	exon	chr12-52602180-52602322	33092
1700031P21Rik	chr12-52637780-52638280	0.188853	0.16657	0.051	0.046	1	ENSMUST00000187526	ENSMUSG00000100315	lincRNA	exon	chr12-52602180-52602322	35457
1700031P21Rik	chr12-52602799-52603299	0.17811	0.192139	0.044	0.039	1	ENSMUST00000187526	ENSMUSG00000100315	lincRNA	exon	chr12-52602180-52602322	476
1700031P21Rik	chr12-52604120-52604620	0.0154557	0.161808	0.179	0.161	1	ENSMUST00000187526	ENSMUSG00000100315	lincRNA	exon	chr12-52602180-52602322	1797
1700031P21Rik	chr12-52605181-52605681	0.247573	0.27707	0.015	0.012	1	ENSMUST00000187526	ENSMUSG00000100315	lincRNA	exon	chr12-52602180-52602322	2858
1700034B16Rik	chr18-75740484-75740984	0.18739	0.122825	0.09	0.083	1	ENSMUST00000180957	ENSMUSG00000097302	lincRNA	exon	chr18-75781032-75781447	40047
1700034B16Rik	chr18-75757333-75757833	0.186879	-0.15619	0.041	0.045	1	ENSMUST00000180957	ENSMUSG00000097302	lincRNA	exon	chr18-75781032-75781447	23198
1700034B16Rik	chr18-75789325-75789825	0.178264	-0.197457	0.028	0.032	1	ENSMUST00000180957	ENSMUSG00000097302	lincRNA	exon	chr18-75781998-75782303	7021
1700034E13Rik	chr18-52664294-52664794	0.226858	-0.328514	0.009	0.01	1	ENSMUST00000118724	ENSMUSG00000024532	protein_coding	utr	chr18-52663719-52663733	560
1700034E13Rik	chr18-52677013-52677513	0.19156	-0.202714	0.025	0.028	1	ENSMUST00000118724	ENSMUSG00000024532	protein_coding	utr	chr18-52663719-52663733	13279
1700034G24Rik	chr5-112635662-112636162	0.200725	-0.240098	0.018	0.02	1	ENSMUST00000182949	ENSMUSG00000097962	lincRNA	exon	chr5-112589874-112589996	45665
1700034K08Rik	chr9-92950022-92950522	0.632668	0.126071	0.012	0.011	1	ENSMUST00000188082	ENSMUSG00000100294	lincRNA	exon	chr9-92979914-92980255	29391
1700034K08Rik	chr9-93755490-93755990	0.424771	-0.125903	0.023	0.026	1	ENSMUST00000190562	ENSMUSG00000100294	lincRNA	exon	chr9-93005684-93005739	749750
1700036A12Rik	chr9-60743161-60743661	0.218054	0.320555	0.014	0.011	1	ENSMUST00000190053	ENSMUSG00000095956	lincRNA	gap	chr9-60743303-60746012	0
1700036A12Rik	chr9-60744548-60745048	0.00771823	0.309064	0.058	0.048	1	ENSMUST00000190053	ENSMUSG00000095956	lincRNA	gap	chr9-60743303-60746012	0
1700037H04Rik	chr2-131159251-131159751	0.109947	-0.328656	0.015	0.019	1	ENSMUST00000184535	ENSMUSG00000027327	protein_coding	gap	chr2-131153711-131159952	0
1700037H04Rik	chr2-131160727-131161227	0.39013	0.137579	0.037	0.032	1	ENSMUST00000028800	ENSMUSG00000027327	protein_coding	exon	chr2-131159953-131160081	645
1700039E15Rik	chr7-45277054-45277554	0.496429	0.139862	0.024	0.019	1	ENSMUST00000176276	ENSMUSG00000070568	protein_coding	utr	chr7-45277513-45277617	0
1700040L02Rik	chr10-68355278-68355778	0.16921	0.261393	0.025	0.021	1	ENSMUST00000020103	ENSMUSG00000019945	protein_coding	utr	chr10-68430953-68431248	75174
1700040L02Rik	chr10-68356027-68356527	0.0221736	0.542196	0.017	0.012	1	ENSMUST00000020103	ENSMUSG00000019945	protein_coding	utr	chr10-68430953-68431248	74425
1700040L02Rik	chr10-68356979-68357479	0.378133	0.155636	0.027	0.025	1	ENSMUST00000020103	ENSMUSG00000019945	protein_coding	utr	chr10-68430953-68431248	73473
1700040L02Rik	chr10-68589701-68590201	0.0632093	0.326053	0.028	0.023	1	ENSMUST00000020103	ENSMUSG00000019945	protein_coding	exon	chr10-68541747-68541896	47804
1700041C23Rik	chr9-57209243-57209743	0.261991	-0.225516	0.015	0.016	1	ENSMUST00000185243	ENSMUSG00000100282	lincRNA	exon	chr9-57186040-57186108	23134
1700041M05Rik	chr4-125319321-125319821	0.467573	0.135466	0.025	0.022	1	ENSMUST00000130055	ENSMUSG00000087010	lincRNA	exon	chr4-125241991-125242052	77268
1700041M05Rik	chr4-125220228-125220728	0.0146855	0.578486	0.015	0.011	1	ENSMUST00000130055	ENSMUSG00000087010	lincRNA	exon	chr4-125228597-125228840	7868
1700041M05Rik	chr4-125231652-125232152	0.602864	0.100476	0.025	0.022	1	ENSMUST00000130055	ENSMUSG00000087010	lincRNA	gap	chr4-125228841-125241990	0
1700041M05Rik	chr4-125261388-125261888	0.520855	0.193204	0.01	0.008	1	ENSMUST00000130055	ENSMUSG00000087010	lincRNA	exon	chr4-125241991-125242052	19335
1700041M05Rik	chr4-125265520-125266020	0.454899	0.209339	0.01	0.009	1	ENSMUST00000130055	ENSMUSG00000087010	lincRNA	exon	chr4-125241991-125242052	23467
1700041M05Rik	chr4-125282363-125282863	0.00175562	-0.369141	0.043	0.055	1	ENSMUST00000130055	ENSMUSG00000087010	lincRNA	exon	chr4-125241991-125242052	40310
1700041M05Rik	chr4-125289092-125289592	0.359115	0.192098	0.02	0.018	1	ENSMUST00000130055	ENSMUSG00000087010	lincRNA	exon	chr4-125241991-125242052	47039
1700041M05Rik	chr4-125300445-125300945	0.23078	0.129839	0.068	0.063	1	ENSMUST00000130055	ENSMUSG00000087010	lincRNA	exon	chr4-125241991-125242052	58392
1700041M19Rik	chr16-76782605-76783105	0.195106	-0.230542	0.021	0.023	1	ENSMUST00000190908	ENSMUSG00000100857	lincRNA	exon	chr16-77004228-77004903	221122
1700041M19Rik	chr16-76896240-76896740	0.361195	0.179469	0.022	0.018	1	ENSMUST00000190908	ENSMUSG00000100857	lincRNA	exon	chr16-77004228-77004903	107487
1700041M19Rik	chr16-76898888-76899388	0.0144923	0.508002	0.019	0.014	1	ENSMUST00000190908	ENSMUSG00000100857	lincRNA	exon	chr16-77004228-77004903	104839
1700041M19Rik	chr16-77003765-77004265	0.3288	-0.228912	0.011	0.013	1	ENSMUST00000190908	ENSMUSG00000100857	lincRNA	exon	chr16-77004228-77004903	0
1700042B14Rik	chrX-155144670-155145170	0.319633	0.107733	0.069	0.064	1	ENSMUST00000076671	ENSMUSG00000057402	protein_coding	exon	chrX-155128275-155128412	16257
1700042B14Rik	chrX-155168736-155169236	0.0352887	0.236859	0.066	0.056	1	ENSMUST00000076671	ENSMUSG00000057402	protein_coding	exon	chrX-155128275-155128412	40323
1700042G07Rik	chr4-116174713-116175213	0.264535	0.108843	0.09	0.081	1	ENSMUST00000106492	ENSMUSG00000078593	protein_coding	utr	chr4-116174208-116174290	422
1700044C05Rik	chr14-118423193-118423693	0.000173912	1.11939	0.012	0.006	1	ENSMUST00000186060	ENSMUSG00000099911	lincRNA	exon	chr14-118397831-118398170	25022
1700044C05Rik	chr14-118437282-118437782	0.0576513	0.213535	0.07	0.058	1	ENSMUST00000186060	ENSMUSG00000099911	lincRNA	exon	chr14-118397831-118398170	39111
1700044K03Rik	chr18-48801286-48801786	0.0990787	-0.136152	0.086	0.092	1	ENSMUST00000190201	ENSMUSG00000100297	lincRNA	exon	chr18-49523289-49523357	721502
1700044K03Rik	chr18-48826945-48827445	0.492363	-0.144692	0.014	0.015	1	ENSMUST00000190201	ENSMUSG00000100297	lincRNA	exon	chr18-49523289-49523357	695843
1700044K03Rik	chr18-49117781-49118281	0.433153	0.216437	0.012	0.011	1	ENSMUST00000190201	ENSMUSG00000100297	lincRNA	exon	chr18-49523289-49523357	405007
1700044K03Rik	chr18-49305414-49305914	0.466356	0.121965	0.034	0.03	1	ENSMUST00000190201	ENSMUSG00000100297	lincRNA	exon	chr18-49523289-49523357	217374
1700044K03Rik	chr18-49319367-49319867	0.145144	-0.162025	0.055	0.058	1	ENSMUST00000190201	ENSMUSG00000100297	lincRNA	exon	chr18-49523289-49523357	203421
1700044K03Rik	chr18-49473217-49473717	0.0275944	0.35956	0.033	0.026	1	ENSMUST00000190201	ENSMUSG00000100297	lincRNA	exon	chr18-49523289-49523357	49571
1700044K03Rik	chr18-49500721-49501221	0.203909	0.129478	0.078	0.071	1	ENSMUST00000190201	ENSMUSG00000100297	lincRNA	exon	chr18-49523289-49523357	22067
1700044K03Rik	chr18-49559007-49559507	0.281292	-0.212289	0.017	0.019	1	ENSMUST00000190201	ENSMUSG00000100297	lincRNA	exon	chr18-49524133-49524440	34566
1700047F07Rik	chr4-107688141-107688641	0.230485	0.316187	0.013	0.01	1	ENSMUST00000143064	ENSMUSG00000085549	lincRNA	exon	chr4-107689701-107689738	1059
1700047F07Rik	chr4-107731026-107731526	0.105438	0.178605	0.071	0.065	1	ENSMUST00000143064	ENSMUSG00000085549	lincRNA	gap	chr4-107715339-107758958	0
1700047F07Rik	chr4-107745639-107746139	0.0576861	-0.242432	0.039	0.046	1	ENSMUST00000143064	ENSMUSG00000085549	lincRNA	gap	chr4-107715339-107758958	0
1700047F07Rik	chr4-107748997-107749497	0.0419347	-0.206159	0.059	0.068	1	ENSMUST00000143064	ENSMUSG00000085549	lincRNA	gap	chr4-107715339-107758958	0
1700047G03Rik	chr15-11966313-11966813	0.360112	0.183427	0.021	0.018	1	ENSMUST00000191278	ENSMUSG00000099349	lincRNA	gap	chr15-11964527-11967813	0
1700047G03Rik	chr15-11971808-11972308	0.25643	0.111016	0.082	0.074	1	ENSMUST00000188888	ENSMUSG00000099349	lincRNA	exon	chr15-11969470-11970083	1724
1700047M11Rik	chr1-182289736-182290236	0.398382	-0.11185	0.034	0.035	1	ENSMUST00000189594	ENSMUSG00000100147	lincRNA	gap	chr1-182288231-182297908	0
1700048O20Rik	chr9-121937795-121938295	0.181751	-0.270159	0.015	0.018	1	ENSMUST00000063103	ENSMUSG00000043773	protein_coding	utr	chr9-121938135-121938162	0
1700048O20Rik	chr9-121928362-121928862	0.361615	-0.112307	0.039	0.041	1	ENSMUST00000063103	ENSMUSG00000043773	protein_coding	exon	chr9-121938135-121938162	9272
1700049E15Rik	chr6-147664310-147664810	0.102866	0.376033	0.016	0.012	1	ENSMUST00000152737	ENSMUSG00000085077	lincRNA	exon	chr6-147690241-147690498	25430
1700049E15Rik	chr6-147671343-147671843	0.124679	0.234175	0.035	0.031	1	ENSMUST00000152737	ENSMUSG00000085077	lincRNA	exon	chr6-147690241-147690498	18397
1700049E15Rik	chr6-147698713-147699213	0.226008	-0.239351	0.016	0.019	1	ENSMUST00000152737	ENSMUSG00000085077	lincRNA	gap	chr6-147695042-147701087	0
1700049E22Rik	chr6-100495100-100495600	0.225558	0.194415	0.033	0.028	1	ENSMUST00000187986	ENSMUSG00000101553	lincRNA	exon	chr6-100527400-100527639	31799
1700049E22Rik	chr6-100421833-100422333	0.0760032	0.524248	0.011	0.007	1	ENSMUST00000187986	ENSMUSG00000101553	lincRNA	exon	chr6-100527400-100527639	105066
1700049E22Rik	chr6-100498881-100499381	0.512508	0.139207	0.018	0.017	1	ENSMUST00000187986	ENSMUSG00000101553	lincRNA	exon	chr6-100527400-100527639	28018
1700049E22Rik	chr6-100503368-100503868	0.110958	-0.329596	0.015	0.018	1	ENSMUST00000187986	ENSMUSG00000101553	lincRNA	exon	chr6-100527400-100527639	23531
1700049E22Rik	chr6-100532334-100532834	0.370254	0.15514	0.03	0.025	1	ENSMUST00000187986	ENSMUSG00000101553	lincRNA	gap	chr6-100529698-100533064	0
1700052I22Rik	chr12-80925766-80926266	0.164311	-0.136649	0.059	0.066	1	ENSMUST00000190431	ENSMUSG00000101912	lincRNA	exon	chr12-80924228-80924449	1316
1700052N19Rik	chr10-4432214-4432714	0.000320517	-0.134045	0.311	0.337	1	ENSMUST00000152294	ENSMUSG00000061759	protein_coding	cds	chr10-4432671-4432711	0
1700054A03Rik	chr19-53080749-53081249	0.0392767	0.640471	0.01	0.007	1	ENSMUST00000189904	ENSMUSG00000099988	lincRNA	gap	chr19-53076446-53083998	0
1700054A03Rik	chr19-53105631-53106131	0.515271	-0.166944	0.009	0.01	1	ENSMUST00000189904	ENSMUSG00000099988	lincRNA	exon	chr19-53083999-53084392	21238
1700054A03Rik	chr19-53107527-53108027	0.0563671	0.208874	0.073	0.066	1	ENSMUST00000189904	ENSMUSG00000099988	lincRNA	exon	chr19-53083999-53084392	23134
1700054K19Rik	chr6-112026191-112026691	0.0593336	0.432772	0.017	0.013	1	ENSMUST00000186102	ENSMUSG00000100219	lincRNA	exon	chr6-112210708-112210764	184016
1700054K19Rik	chr6-112026737-112027237	0.0228153	-0.292275	0.04	0.043	1	ENSMUST00000186102	ENSMUSG00000100219	lincRNA	exon	chr6-112210708-112210764	183470
1700054K19Rik	chr6-112108612-112109112	0.234374	0.109897	0.096	0.088	1	ENSMUST00000186102	ENSMUSG00000100219	lincRNA	exon	chr6-112210708-112210764	101595
1700054K19Rik	chr6-112133484-112133984	0.0774927	-0.320497	0.018	0.022	1	ENSMUST00000186102	ENSMUSG00000100219	lincRNA	exon	chr6-112210708-112210764	76723
1700054K19Rik	chr6-112167423-112167923	0.550919	0.105594	0.029	0.026	1	ENSMUST00000186102	ENSMUSG00000100219	lincRNA	exon	chr6-112210708-112210764	42784
1700054K19Rik	chr6-112191018-112191518	0.127014	-0.21977	0.029	0.033	1	ENSMUST00000186102	ENSMUSG00000100219	lincRNA	exon	chr6-112210708-112210764	19189
1700054K19Rik	chr6-112207193-112207693	0.221766	0.14976	0.053	0.048	1	ENSMUST00000186102	ENSMUSG00000100219	lincRNA	exon	chr6-112210708-112210764	3014
1700056E22Rik	chr1-184033388-184033888	0.260129	0.101304	0.111	0.107	1	ENSMUST00000050306	ENSMUSG00000044854	protein_coding	cds	chr1-184033156-184033860	0
1700057G04Rik	chr9-92375333-92375833	0.292178	-0.225813	0.013	0.016	1	ENSMUST00000135182	ENSMUSG00000074139	protein_coding	utr	chr9-92357702-92357876	17456
1700057H15Rik	chr4-124465381-124465881	0.0105611	-0.220505	0.081	0.091	1	ENSMUST00000143859	ENSMUSG00000084757	lincRNA	gap	chr4-124450680-124483034	0
1700057H15Rik	chr4-124526891-124527391	0.0766091	-0.203141	0.047	0.053	1	ENSMUST00000143859	ENSMUSG00000084757	lincRNA	exon	chr4-124485927-124485959	40931
1700057H15Rik	chr4-124485805-124486305	0.508793	-0.156409	0.01	0.011	1	ENSMUST00000143859	ENSMUSG00000084757	lincRNA	gap	chr4-124483104-124485926	0
1700057H15Rik	chr4-124497974-124498474	0.052552	0.199357	0.077	0.068	1	ENSMUST00000143859	ENSMUSG00000084757	lincRNA	exon	chr4-124485927-124485959	12014
1700057H15Rik	chr4-124509680-124510180	0.202693	-0.16664	0.035	0.038	1	ENSMUST00000143859	ENSMUSG00000084757	lincRNA	exon	chr4-124485927-124485959	23720
1700060C16Rik	chr6-143697720-143698220	0.0200251	-0.336089	0.029	0.036	1	ENSMUST00000150559	ENSMUSG00000086887	lincRNA	exon	chr6-143651223-143651288	46431
1700060C16Rik	chr6-143595459-143595959	0.0041941	0.502769	0.028	0.02	1	ENSMUST00000150559	ENSMUSG00000086887	lincRNA	gap	chr6-143593533-143613873	0
1700060C16Rik	chr6-143609039-143609539	0.21084	0.23729	0.023	0.02	1	ENSMUST00000150559	ENSMUSG00000086887	lincRNA	gap	chr6-143593533-143613873	0
1700060C16Rik	chr6-143614584-143615084	0.435788	0.110476	0.044	0.041	1	ENSMUST00000150559	ENSMUSG00000086887	lincRNA	gap	chr6-143613943-143615474	0
1700061I17Rik	chr3-117061770-117062270	0.189603	0.361127	0.011	0.008	1	ENSMUST00000029642	ENSMUSG00000028009	lincRNA	gap	chr3-117061683-117062450	0
1700061I17Rik	chr3-117152879-117153379	0.616617	-0.129044	0.009	0.01	1	ENSMUST00000029642	ENSMUSG00000028009	lincRNA	exon	chr3-117077393-117077765	75113
1700061J23Rik	chr11-23119292-23119792	0.256837	-0.276643	0.012	0.013	1	ENSMUST00000141678	ENSMUSG00000086366	lincRNA	exon	chr11-23152140-23152237	32347
1700061J23Rik	chr11-23140733-23141233	0.0761656	0.139488	0.127	0.118	1	ENSMUST00000141678	ENSMUSG00000086366	lincRNA	exon	chr11-23152140-23152237	10906
1700061J23Rik	chr11-23141368-23141868	0.449141	0.115393	0.039	0.035	1	ENSMUST00000141678	ENSMUSG00000086366	lincRNA	exon	chr11-23152140-23152237	10271
1700063D05Rik	chr9-41213087-41213587	0.278903	0.306311	0.013	0.01	1	ENSMUST00000191461	ENSMUSG00000100837	lincRNA	gap	chr9-41211035-41216734	0
1700063D05Rik	chr9-41285623-41286123	0.631704	0.1364	0.012	0.011	1	ENSMUST00000191461	ENSMUSG00000100837	lincRNA	exon	chr9-41217460-41217627	67995
1700063D05Rik	chr9-41212583-41213083	0.484963	0.126371	0.029	0.026	1	ENSMUST00000191461	ENSMUSG00000100837	lincRNA	gap	chr9-41211035-41216734	0
1700063D05Rik	chr9-41273360-41273860	0.148754	-0.201614	0.035	0.037	1	ENSMUST00000191461	ENSMUSG00000100837	lincRNA	exon	chr9-41217460-41217627	55732
1700063D05Rik	chr9-41216219-41216719	0.110157	0.159867	0.083	0.074	1	ENSMUST00000191461	ENSMUSG00000100837	lincRNA	gap	chr9-41211035-41216734	0
1700063D05Rik	chr9-41228710-41229210	0.115414	0.115168	0.148	0.135	1	ENSMUST00000191461	ENSMUSG00000100837	lincRNA	exon	chr9-41217460-41217627	11082
1700063D05Rik	chr9-41272723-41273223	0.0592405	-0.422695	0.013	0.018	1	ENSMUST00000191461	ENSMUSG00000100837	lincRNA	exon	chr9-41217460-41217627	55095
1700063D05Rik	chr9-41207975-41208475	0.250391	0.103039	0.113	0.1	1	ENSMUST00000185590	ENSMUSG00000100837	lincRNA	gap	chr9-41206330-41210837	0
1700063H04Rik	chr6-122416441-122416941	0.0488096	0.429746	0.019	0.014	1	ENSMUST00000043553	ENSMUSG00000040657	protein_coding	utr	chr6-122392352-122392687	23753
1700063H06Rik	chr9-82247639-82248139	0.206873	0.243337	0.021	0.018	1	ENSMUST00000183678	ENSMUSG00000099266	lincRNA	exon	chr9-82260293-82260433	12153
1700064J06Rik	chr10-119023951-119024451	0.108603	-0.36194	0.013	0.015	1	ENSMUST00000187551	ENSMUSG00000100681	lincRNA	exon	chr10-119092905-119092933	68453
1700064J06Rik	chr10-119031880-119032380	0.547861	-0.148821	0.01	0.011	1	ENSMUST00000187551	ENSMUSG00000100681	lincRNA	exon	chr10-119092905-119092933	60524
1700064J06Rik	chr10-119052367-119052867	0.398073	0.200267	0.016	0.013	1	ENSMUST00000187551	ENSMUSG00000100681	lincRNA	exon	chr10-119092905-119092933	40037
1700064J06Rik	chr10-119054249-119054749	0.0188095	-0.565194	0.011	0.015	1	ENSMUST00000187551	ENSMUSG00000100681	lincRNA	exon	chr10-119092905-119092933	38155
1700064J06Rik	chr10-119055151-119055651	0.0011813	-0.172478	0.189	0.209	1	ENSMUST00000187551	ENSMUSG00000100681	lincRNA	exon	chr10-119092905-119092933	37253
1700064J06Rik	chr10-119056462-119056962	0.264536	0.330915	0.01	0.008	1	ENSMUST00000187551	ENSMUSG00000100681	lincRNA	exon	chr10-119092905-119092933	35942
1700064J06Rik	chr10-119061527-119062027	0.00143163	-0.68131	0.013	0.02	1	ENSMUST00000187551	ENSMUSG00000100681	lincRNA	exon	chr10-119092905-119092933	30877
1700064J06Rik	chr10-119079244-119079744	0.00202572	-0.246983	0.093	0.106	1	ENSMUST00000187551	ENSMUSG00000100681	lincRNA	exon	chr10-119092905-119092933	13160
1700064J06Rik	chr10-119080544-119081044	0.221829	-0.236109	0.016	0.019	1	ENSMUST00000187551	ENSMUSG00000100681	lincRNA	exon	chr10-119092905-119092933	11860
1700064M15Rik	chr12-99627092-99627592	0.393632	0.164617	0.026	0.022	1	ENSMUST00000185726	ENSMUSG00000100211	lincRNA	gap	chr12-99626329-99627605	0
1700064M15Rik	chr12-99640359-99640859	0.0502776	0.301363	0.037	0.033	1	ENSMUST00000185726	ENSMUSG00000100211	lincRNA	exon	chr12-99627606-99627974	12384
1700064M15Rik	chr12-99641284-99641784	0.195291	0.35459	0.012	0.01	1	ENSMUST00000185726	ENSMUSG00000100211	lincRNA	exon	chr12-99627606-99627974	13309
1700064M15Rik	chr12-99670412-99670912	0.462436	0.150655	0.021	0.019	1	ENSMUST00000185726	ENSMUSG00000100211	lincRNA	exon	chr12-99627606-99627974	42437
1700065J18Rik	chr1-192823214-192823714	0.442923	0.134652	0.029	0.026	1	ENSMUST00000190576	ENSMUSG00000100872	lincRNA	exon	chr1-192841661-192841737	17946
1700065J18Rik	chr1-192835273-192835773	0.373221	0.215548	0.015	0.014	1	ENSMUST00000190576	ENSMUSG00000100872	lincRNA	exon	chr1-192841661-192841737	5887
1700066B19Rik	chr18-35730214-35730714	0.103582	0.150528	0.094	0.084	1	ENSMUST00000097617	ENSMUSG00000073598	protein_coding	utr	chr18-35728849-35730869	0
1700066J03Rik	chr13-58148447-58148947	0.221891	0.220518	0.027	0.021	1	ENSMUST00000181908	ENSMUSG00000097717	lincRNA	gap	chr13-58148905-58149376	0
1700066M21Rik	chr1-57377836-57378336	0.0788302	0.205841	0.064	0.056	1	ENSMUST00000042734	ENSMUSG00000038323	protein_coding	cds	chr1-57377671-57377946	0
1700067G17Rik	chr1-88964270-88964770	0.622329	0.151965	0.011	0.008	1	ENSMUST00000186180	ENSMUSG00000099378	lincRNA	exon	chr1-89016113-89016372	51342
1700067G17Rik	chr1-89012386-89012886	0.0723168	-0.343146	0.018	0.021	1	ENSMUST00000186180	ENSMUSG00000099378	lincRNA	exon	chr1-89016113-89016372	3226
1700069L16Rik	chr5-113689950-113690450	0.631605	0.136471	0.011	0.011	1	ENSMUST00000162388	ENSMUSG00000042184	protein_coding	utr	chr5-113692422-113692678	1971
1700069L16Rik	chr5-113694523-113695023	0.40737	0.217147	0.013	0.012	1	ENSMUST00000162388	ENSMUSG00000042184	protein_coding	gap	chr5-113692820-113723699	0
1700069L16Rik	chr5-113724431-113724931	0.229163	0.17033	0.04	0.037	1	ENSMUST00000162388	ENSMUSG00000042184	protein_coding	utr	chr5-113724631-113724772	0
1700072B07Rik	chr9-58386743-58387243	0.529989	0.106465	0.03	0.03	1	ENSMUST00000191141	ENSMUSG00000100487	lincRNA	exon	chr9-58373937-58374183	12559
1700072B07Rik	chr9-58410312-58410812	0.469789	-0.103187	0.029	0.032	1	ENSMUST00000191141	ENSMUSG00000100487	lincRNA	exon	chr9-58373937-58374183	36128
1700080O16Rik	chrX-51913201-51913701	0.404452	0.143714	0.028	0.025	1	ENSMUST00000033449	ENSMUSG00000031118	protein_coding	utr	chrX-51968695-51968952	54993
1700080O16Rik	chrX-51911521-51912021	0.572607	-0.115793	0.015	0.016	1	ENSMUST00000033449	ENSMUSG00000031118	protein_coding	utr	chrX-51968695-51968952	56673
1700081H04Rik	chr5-119167757-119168257	0.201294	0.201391	0.034	0.031	1	ENSMUST00000190550	ENSMUSG00000100573	lincRNA	exon	chr5-119114220-119114543	53213
1700081H04Rik	chr5-118994661-118995161	0.380948	-0.100535	0.045	0.047	1	ENSMUST00000190550	ENSMUSG00000100573	lincRNA	exon	chr5-119108234-119108715	113072
1700081H04Rik	chr5-119162191-119162691	0.00271656	0.400052	0.047	0.035	1	ENSMUST00000190550	ENSMUSG00000100573	lincRNA	exon	chr5-119114220-119114543	47647
1700083H02Rik	chr12-71364072-71364572	0.21523	-0.180287	0.029	0.032	1	ENSMUST00000190526	ENSMUSG00000100668	lincRNA	exon	chr12-71383154-71383632	18581
1700083H02Rik	chr12-71366190-71366690	0.00677929	-0.259652	0.064	0.078	1	ENSMUST00000190526	ENSMUSG00000100668	lincRNA	exon	chr12-71383154-71383632	16463
1700083H02Rik	chr12-71398652-71399152	0.481363	-0.153482	0.013	0.015	1	ENSMUST00000190526	ENSMUSG00000100668	lincRNA	exon	chr12-71384051-71384208	14443
1700083H02Rik	chr12-71408663-71409163	0.0869906	-0.268027	0.025	0.031	1	ENSMUST00000190526	ENSMUSG00000100668	lincRNA	exon	chr12-71384051-71384208	24454
1700083H02Rik	chr12-71450054-71450554	0.16519	-0.13355	0.062	0.068	1	ENSMUST00000190526	ENSMUSG00000100668	lincRNA	exon	chr12-71384051-71384208	65845
1700083H02Rik	chr12-71468494-71468994	4.29309e-05	-0.762464	0.017	0.025	1	ENSMUST00000190526	ENSMUSG00000100668	lincRNA	exon	chr12-71384051-71384208	84285
1700083H02Rik	chr12-71494616-71495116	0.45231	0.222855	0.01	0.008	1	ENSMUST00000190526	ENSMUSG00000100668	lincRNA	exon	chr12-71384051-71384208	110407
1700083H02Rik	chr12-71522375-71522875	0.33064	-0.248748	0.01	0.011	1	ENSMUST00000190526	ENSMUSG00000100668	lincRNA	exon	chr12-71384051-71384208	138166
1700083H02Rik	chr12-71549308-71549808	0.211453	0.364176	0.011	0.008	1	ENSMUST00000190526	ENSMUSG00000100668	lincRNA	exon	chr12-71384051-71384208	165099
1700083H02Rik	chr12-71565423-71565923	0.0010116	0.48761	0.039	0.029	1	ENSMUST00000190526	ENSMUSG00000100668	lincRNA	exon	chr12-71384051-71384208	181214
1700084C01Rik	chr1-169919127-169919627	1.40243e-05	0.6106	0.043	0.029	1	ENSMUST00000094348	ENSMUSG00000070532	protein_coding	exon	chr1-169928648-169929003	9020
1700084C01Rik	chr1-169921567-169922067	0.183134	0.172541	0.049	0.044	1	ENSMUST00000094348	ENSMUSG00000070532	protein_coding	exon	chr1-169928648-169929003	6580
1700084C01Rik	chr1-169924550-169925050	0.0158915	0.432054	0.029	0.02	1	ENSMUST00000094348	ENSMUSG00000070532	protein_coding	exon	chr1-169928648-169929003	3597
1700084C01Rik	chr1-169930941-169931441	0.0335992	0.29799	0.044	0.035	1	ENSMUST00000175731	ENSMUSG00000070532	protein_coding	gap	chr1-169930161-169932991	0
1700084C01Rik	chr1-169931525-169932025	0.503253	0.116541	0.032	0.029	1	ENSMUST00000175731	ENSMUSG00000070532	protein_coding	gap	chr1-169930161-169932991	0
1700084C01Rik	chr1-169932106-169932606	0.165726	0.25115	0.025	0.024	1	ENSMUST00000175731	ENSMUSG00000070532	protein_coding	gap	chr1-169930161-169932991	0
1700084C01Rik	chr1-169934003-169934503	0.0217835	0.249162	0.072	0.061	1	ENSMUST00000175731	ENSMUSG00000070532	protein_coding	cds	chr1-169933642-169934200	0
1700084C01Rik	chr1-169934835-169935335	0.151899	0.247793	0.028	0.023	1	ENSMUST00000094348	ENSMUSG00000070532	protein_coding	utr	chr1-169934201-169934653	181
1700084C01Rik	chr1-169937740-169938240	0.342396	0.207852	0.018	0.016	1	ENSMUST00000094348	ENSMUSG00000070532	protein_coding	utr	chr1-169934201-169934653	3086
1700084F23Rik	chr13-69933434-69933934	0.00476203	0.538773	0.025	0.018	1	ENSMUST00000186662	ENSMUSG00000099639	lincRNA	exon	chr13-70004050-70004591	70115
1700086L19Rik	chr12-74283970-74284470	0.00106181	-0.18754	0.16	0.179	1	ENSMUST00000186463	ENSMUSG00000071265	lincRNA	gap	chr12-74284457-74285514	0
1700086O06Rik	chr18-38240917-38241417	0.0220792	0.152121	0.168	0.151	1	ENSMUST00000181871	ENSMUSG00000097080	lincRNA	gap	chr18-38240954-38249713	0
1700086O06Rik	chr18-38241501-38242001	0.109295	0.425439	0.013	0.01	1	ENSMUST00000181871	ENSMUSG00000097080	lincRNA	gap	chr18-38240954-38249713	0
1700086O06Rik	chr18-38239491-38239991	0.249869	0.141175	0.062	0.055	1	ENSMUST00000181871	ENSMUSG00000097080	lincRNA	gap	chr18-38239752-38240838	0
1700086O06Rik	chr18-38240066-38240566	0.21683	0.260728	0.022	0.017	1	ENSMUST00000181871	ENSMUSG00000097080	lincRNA	gap	chr18-38239752-38240838	0
1700086P04Rik	chr4-129033418-129033918	0.0351587	0.586769	0.012	0.008	1	ENSMUST00000149472	ENSMUSG00000085085	lincRNA	exon	chr4-129050097-129050909	16178
1700086P04Rik	chr4-129035103-129035603	0.16258	0.1854	0.048	0.041	1	ENSMUST00000149472	ENSMUSG00000085085	lincRNA	exon	chr4-129050097-129050909	14493
1700086P04Rik	chr4-129048806-129049306	0.411112	-0.120859	0.027	0.028	1	ENSMUST00000149472	ENSMUSG00000085085	lincRNA	exon	chr4-129050097-129050909	790
1700088E04Rik	chr15-79139566-79140066	0.0370899	0.48305	0.015	0.012	1	ENSMUST00000186459	ENSMUSG00000033029	protein_coding	cds	chr15-79139748-79139839	0
1700092C17Rik	chr2-22758541-22759041	0.119405	0.205843	0.045	0.04	1	ENSMUST00000135792	ENSMUSG00000085353	lincRNA	gap	chr2-22756044-22761909	0
1700092E19Rik	chr13-26154887-26155387	0.22902	0.119421	0.087	0.082	1	ENSMUST00000154703	ENSMUSG00000084811	lincRNA	exon	chr13-26284151-26284263	128763
1700092E19Rik	chr13-26464466-26464966	0.0201323	-0.309098	0.035	0.041	1	ENSMUST00000154703	ENSMUSG00000084811	lincRNA	exon	chr13-26312121-26312406	152059
1700092K14Rik	chr11-114175794-114176294	0.05263	-0.335287	0.022	0.025	1	ENSMUST00000106604	ENSMUSG00000078600	processed_transcript	exon	chr11-114198258-114198323	21963
1700092K14Rik	chr11-114183204-114183704	1.02115e-05	-0.264767	0.153	0.181	1	ENSMUST00000106604	ENSMUSG00000078600	processed_transcript	exon	chr11-114198258-114198323	14553
1700092K14Rik	chr11-114185408-114185908	0.276998	-0.20458	0.017	0.02	1	ENSMUST00000106604	ENSMUSG00000078600	processed_transcript	exon	chr11-114198258-114198323	12349
1700092K14Rik	chr11-114205156-114205656	0.522717	-0.11054	0.018	0.02	1	ENSMUST00000106604	ENSMUSG00000078600	processed_transcript	exon	chr11-114199023-114199199	5956
1700095A13Rik	chr18-83063202-83063702	0.0884446	0.333464	0.021	0.017	1	ENSMUST00000185460	ENSMUSG00000100430	lincRNA	exon	chr18-83106528-83106962	42825
1700095A13Rik	chr18-83064976-83065476	0.00057167	-0.230045	0.13	0.148	1	ENSMUST00000185460	ENSMUSG00000100430	lincRNA	exon	chr18-83106528-83106962	41051
1700095A13Rik	chr18-83066926-83067426	0.411945	0.126398	0.037	0.034	1	ENSMUST00000185460	ENSMUSG00000100430	lincRNA	exon	chr18-83106528-83106962	39101
1700095A13Rik	chr18-83068188-83068688	0.0152215	0.43247	0.028	0.023	1	ENSMUST00000185460	ENSMUSG00000100430	lincRNA	exon	chr18-83106528-83106962	37839
1700095A13Rik	chr18-83074559-83075059	0.373654	0.194488	0.017	0.014	1	ENSMUST00000185460	ENSMUSG00000100430	lincRNA	exon	chr18-83106528-83106962	31468
1700095A13Rik	chr18-83077686-83078186	0.585818	0.164158	0.01	0.008	1	ENSMUST00000185460	ENSMUSG00000100430	lincRNA	exon	chr18-83106528-83106962	28341
1700095A13Rik	chr18-83399376-83399876	3.89766e-05	0.305567	0.141	0.116	1	ENSMUST00000185460	ENSMUSG00000100430	lincRNA	exon	chr18-83107585-83107860	291515
1700095A13Rik	chr18-83400147-83400647	0.0940236	0.216012	0.054	0.046	1	ENSMUST00000185460	ENSMUSG00000100430	lincRNA	exon	chr18-83107585-83107860	292286
1700095A13Rik	chr18-83468156-83468656	0.599668	-0.11866	0.013	0.013	1	ENSMUST00000185460	ENSMUSG00000100430	lincRNA	exon	chr18-83107585-83107860	360295
1700095A13Rik	chr18-83490121-83490621	0.0765242	0.48594	0.012	0.009	1	ENSMUST00000185460	ENSMUSG00000100430	lincRNA	exon	chr18-83107585-83107860	382260
1700095A13Rik	chr18-83523944-83524444	0.543085	-0.150484	0.01	0.011	1	ENSMUST00000185460	ENSMUSG00000100430	lincRNA	exon	chr18-83107585-83107860	416083
1700095A13Rik	chr18-83525596-83526096	0.000788717	0.891972	0.015	0.008	1	ENSMUST00000185460	ENSMUSG00000100430	lincRNA	exon	chr18-83107585-83107860	417735
1700095A13Rik	chr18-83526233-83526733	6.75384e-06	1.00378	0.021	0.011	1	ENSMUST00000185460	ENSMUSG00000100430	lincRNA	exon	chr18-83107585-83107860	418372
1700095A13Rik	chr18-83539583-83540083	0.0024022	0.793198	0.013	0.009	1	ENSMUST00000185460	ENSMUSG00000100430	lincRNA	exon	chr18-83107585-83107860	431722
1700095J03Rik	chr7-109444975-109445475	0.255463	-0.156247	0.031	0.034	1	ENSMUST00000143715	ENSMUSG00000085407	processed_transcript	exon	chr7-109444651-109444893	81
1700096J18Rik	chr11-109327776-109328276	0.0529573	0.442854	0.017	0.012	1	ENSMUST00000190043	ENSMUSG00000099630	lincRNA	exon	chr11-109346839-109347052	18562
1700096J18Rik	chr11-109346531-109347031	0.470755	0.106006	0.042	0.038	1	ENSMUST00000190043	ENSMUSG00000099630	lincRNA	exon	chr11-109346839-109347052	0
1700096J18Rik	chr11-109348387-109348887	0.565817	-0.131858	0.012	0.012	1	ENSMUST00000190043	ENSMUSG00000099630	lincRNA	gap	chr11-109347053-109353383	0
1700096J18Rik	chr11-109348983-109349483	0.227219	-0.322295	0.009	0.011	1	ENSMUST00000190043	ENSMUSG00000099630	lincRNA	gap	chr11-109347053-109353383	0
1700096J18Rik	chr11-109350114-109350614	0.144098	0.299492	0.021	0.017	1	ENSMUST00000190043	ENSMUSG00000099630	lincRNA	gap	chr11-109347053-109353383	0
1700096J18Rik	chr11-109355999-109356499	0.441749	0.105046	0.053	0.048	1	ENSMUST00000190043	ENSMUSG00000099630	lincRNA	exon	chr11-109353384-109353651	2347
1700101E01Rik	chr2-28923836-28924336	0.193115	0.151804	0.057	0.053	1	ENSMUST00000189027	ENSMUSG00000079502	protein_coding	utr	chr2-28926949-28927951	2612
1700101E01Rik	chr2-28966103-28966603	0.0932007	-0.386506	0.012	0.015	1	ENSMUST00000190049	ENSMUSG00000079502	protein_coding	gap	chr2-28962738-28984295	0
1700101E01Rik	chr2-29006429-29006929	0.026944	-0.112291	0.196	0.206	1	ENSMUST00000190049	ENSMUSG00000079502	protein_coding	gap	chr2-28985902-29039238	0
1700101E01Rik	chr2-29052764-29053264	0.0651022	0.262804	0.039	0.034	1	ENSMUST00000189711	ENSMUSG00000079502	protein_coding	gap	chr2-28985902-29054813	0
1700101E01Rik	chr2-29055031-29055531	0.059932	-0.217447	0.044	0.05	1	ENSMUST00000189711	ENSMUSG00000079502	protein_coding	utr	chr2-29055009-29055039	0
1700101O22Rik	chr12-6637890-6638390	0.0142667	0.422557	0.031	0.023	1	ENSMUST00000187396	ENSMUSG00000102096	lincRNA	exon	chr12-7372039-7372203	733648
1700101O22Rik	chr12-7543538-7544038	0.474487	0.155257	0.017	0.016	1	ENSMUST00000187396	ENSMUSG00000102096	lincRNA	exon	chr12-7380265-7380330	163207
1700104B16Rik	chr8-33721981-33722481	0.546113	-0.12274	0.014	0.015	1	ENSMUST00000187948	ENSMUSG00000049476	lincRNA	exon	chr8-33730534-33731077	8052
1700106J16Rik	chr11-88253483-88253983	0.46982	-0.116698	0.023	0.025	1	ENSMUST00000037268	ENSMUSG00000034031	protein_coding	exon	chr11-88294058-88295261	40074
1700106J16Rik	chr11-88264840-88265340	0.590795	-0.112407	0.015	0.014	1	ENSMUST00000037268	ENSMUSG00000034031	protein_coding	exon	chr11-88294058-88295261	28717
1700106J16Rik	chr11-88274811-88275311	0.260944	0.204435	0.028	0.023	1	ENSMUST00000037268	ENSMUSG00000034031	protein_coding	exon	chr11-88294058-88295261	18746
1700106J16Rik	chr11-88275349-88275849	0.145637	0.332487	0.018	0.013	1	ENSMUST00000037268	ENSMUSG00000034031	protein_coding	exon	chr11-88294058-88295261	18208
1700106J16Rik	chr11-88280453-88280953	0.53076	0.168259	0.011	0.01	1	ENSMUST00000037268	ENSMUSG00000034031	protein_coding	exon	chr11-88294058-88295261	13104
1700106J16Rik	chr11-88288452-88288952	0.562743	0.102447	0.029	0.027	1	ENSMUST00000037268	ENSMUSG00000034031	protein_coding	exon	chr11-88294058-88295261	5105
1700106J16Rik	chr11-88289000-88289500	0.191821	-0.292551	0.012	0.015	1	ENSMUST00000037268	ENSMUSG00000034031	protein_coding	exon	chr11-88294058-88295261	4557
1700106J16Rik	chr11-88291644-88292144	0.0941574	-0.226712	0.032	0.037	1	ENSMUST00000037268	ENSMUSG00000034031	protein_coding	exon	chr11-88294058-88295261	1913
1700108F19Rik	chr14-76622561-76623061	0.444057	0.130228	0.034	0.029	1	ENSMUST00000189375	ENSMUSG00000101009	processed_transcript	exon	chr14-76672963-76673014	49901
1700108F19Rik	chr14-76658200-76658700	0.189563	0.324006	0.014	0.012	1	ENSMUST00000189375	ENSMUSG00000101009	processed_transcript	exon	chr14-76672963-76673014	14262
1700108F19Rik	chr14-76750537-76751037	0.414654	-0.132769	0.024	0.027	1	ENSMUST00000189375	ENSMUSG00000101009	processed_transcript	exon	chr14-76686728-76687169	63367
1700108F19Rik	chr14-76760711-76761211	0.211025	0.17453	0.047	0.041	1	ENSMUST00000189375	ENSMUSG00000101009	processed_transcript	exon	chr14-76686728-76687169	73541
1700108F19Rik	chr14-76764208-76764708	0.507474	0.190806	0.012	0.01	1	ENSMUST00000189375	ENSMUSG00000101009	processed_transcript	exon	chr14-76686728-76687169	77038
1700108F19Rik	chr14-76773069-76773569	0.341709	0.26267	0.01	0.01	1	ENSMUST00000189375	ENSMUSG00000101009	processed_transcript	exon	chr14-76686728-76687169	85899
1700108F19Rik	chr14-76778469-76778969	0.346504	-0.175239	0.019	0.019	1	ENSMUST00000189375	ENSMUSG00000101009	processed_transcript	exon	chr14-76686728-76687169	91299
1700108F19Rik	chr14-76798588-76799088	0.348205	-0.133993	0.032	0.035	1	ENSMUST00000189375	ENSMUSG00000101009	processed_transcript	exon	chr14-76686728-76687169	111418
1700108F19Rik	chr14-76817319-76817819	0.0676177	-0.35057	0.018	0.022	1	ENSMUST00000189375	ENSMUSG00000101009	processed_transcript	exon	chr14-76686728-76687169	130149
1700108F19Rik	chr14-76818131-76818631	8.724e-06	-0.700582	0.024	0.036	1	ENSMUST00000189375	ENSMUSG00000101009	processed_transcript	exon	chr14-76686728-76687169	130961
1700108F19Rik	chr14-76819610-76820110	0.000424963	-0.132205	0.32	0.346	1	ENSMUST00000189375	ENSMUSG00000101009	processed_transcript	exon	chr14-76686728-76687169	132440
1700108F19Rik	chr14-76836949-76837449	0.406486	0.113396	0.049	0.045	1	ENSMUST00000189375	ENSMUSG00000101009	processed_transcript	exon	chr14-76686728-76687169	149779
1700109G15Rik	chr11-84628027-84628527	0.192199	0.313969	0.015	0.012	1	ENSMUST00000150735	ENSMUSG00000085044	lincRNA	exon	chr11-84716976-84717159	88448
1700109G15Rik	chr11-84661920-84662420	0.00450741	0.554355	0.023	0.016	1	ENSMUST00000150735	ENSMUSG00000085044	lincRNA	exon	chr11-84716976-84717159	54555
1700109G15Rik	chr11-84707697-84708197	0.476812	0.185911	0.013	0.01	1	ENSMUST00000150735	ENSMUSG00000085044	lincRNA	exon	chr11-84716976-84717159	8778
1700109G15Rik	chr11-84721938-84722438	0.523577	0.164896	0.013	0.011	1	ENSMUST00000150735	ENSMUSG00000085044	lincRNA	exon	chr11-84720386-84720432	1505
1700110C19Rik	chr17-10330250-10330750	0.165219	0.293863	0.02	0.015	1	ENSMUST00000188715	ENSMUSG00000099384	lincRNA	exon	chr17-10328920-10329307	942
1700110C19Rik	chr17-10337813-10338313	0.240172	0.207005	0.027	0.025	1	ENSMUST00000188715	ENSMUSG00000099384	lincRNA	exon	chr17-10328920-10329307	8505
1700110C19Rik	chr17-10321867-10322367	0.315841	0.154655	0.037	0.034	1	ENSMUST00000187397	ENSMUSG00000099384	lincRNA	exon	chr17-10324602-10324753	2234
1700110C19Rik	chr17-10325544-10326044	0.633407	0.125979	0.014	0.012	1	ENSMUST00000188715	ENSMUSG00000099384	lincRNA	gap	chr17-10325195-10328919	0
1700110C19Rik	chr17-10326585-10327085	0.0816047	0.150097	0.108	0.1	1	ENSMUST00000188715	ENSMUSG00000099384	lincRNA	gap	chr17-10325195-10328919	0
1700110C19Rik	chr17-10327603-10328103	0.501162	0.169842	0.014	0.012	1	ENSMUST00000188715	ENSMUSG00000099384	lincRNA	gap	chr17-10325195-10328919	0
1700110C19Rik	chr17-10363308-10363808	0.329778	-0.221977	0.012	0.014	1	ENSMUST00000188715	ENSMUSG00000099384	lincRNA	exon	chr17-10328920-10329307	34000
1700112E06Rik	chr14-22019544-22020044	0.0856207	-0.130862	0.095	0.104	1	ENSMUST00000162540	ENSMUSG00000063458	protein_coding	cds	chr14-22019879-22019908	0
1700112E06Rik	chr14-22077167-22077667	0.000177511	-0.447906	0.041	0.054	1	ENSMUST00000162540	ENSMUSG00000063458	protein_coding	gap	chr14-22027328-22577847	0
1700112E06Rik	chr14-22175834-22176334	0.446366	-0.148189	0.016	0.018	1	ENSMUST00000162540	ENSMUSG00000063458	protein_coding	gap	chr14-22027328-22577847	0
1700112E06Rik	chr14-22213569-22214069	0.490641	0.109959	0.034	0.032	1	ENSMUST00000162540	ENSMUSG00000063458	protein_coding	gap	chr14-22027328-22577847	0
1700112E06Rik	chr14-22215914-22216414	0.019848	-0.202144	0.078	0.087	1	ENSMUST00000162540	ENSMUSG00000063458	protein_coding	gap	chr14-22027328-22577847	0
1700112E06Rik	chr14-22259321-22259821	0.395023	-0.224045	0.009	0.011	1	ENSMUST00000162540	ENSMUSG00000063458	protein_coding	gap	chr14-22027328-22577847	0
1700112E06Rik	chr14-22289680-22290180	0.0178104	-0.318609	0.033	0.042	1	ENSMUST00000162540	ENSMUSG00000063458	protein_coding	gap	chr14-22027328-22577847	0
1700112E06Rik	chr14-22367661-22368161	0.0190652	0.578844	0.016	0.01	1	ENSMUST00000162540	ENSMUSG00000063458	protein_coding	gap	chr14-22027328-22577847	0
1700112E06Rik	chr14-22439852-22440352	0.333169	0.223571	0.017	0.014	1	ENSMUST00000162540	ENSMUSG00000063458	protein_coding	gap	chr14-22027328-22577847	0
1700112E06Rik	chr14-22440545-22441045	8.50496e-05	0.439819	0.072	0.054	1	ENSMUST00000162540	ENSMUSG00000063458	protein_coding	gap	chr14-22027328-22577847	0
1700112E06Rik	chr14-22577511-22578011	0.257092	-0.210118	0.018	0.021	1	ENSMUST00000162540	ENSMUSG00000063458	protein_coding	cds	chr14-22577848-22577974	0
1700112E06Rik	chr14-22738566-22739066	0.333266	0.200698	0.02	0.018	1	ENSMUST00000162540	ENSMUSG00000063458	protein_coding	gap	chr14-22684893-23055954	0
1700112E06Rik	chr14-22745983-22746483	0.41703	-0.105901	0.035	0.036	1	ENSMUST00000162540	ENSMUSG00000063458	protein_coding	gap	chr14-22684893-23055954	0
1700112E06Rik	chr14-22817243-22817743	0.477705	-0.11806	0.021	0.022	1	ENSMUST00000162540	ENSMUSG00000063458	protein_coding	gap	chr14-22684893-23055954	0
1700112E06Rik	chr14-22861837-22862337	0.201265	-0.354563	0.008	0.01	1	ENSMUST00000162540	ENSMUSG00000063458	protein_coding	gap	chr14-22684893-23055954	0
1700112E06Rik	chr14-22964825-22965325	0.0143899	0.551942	0.019	0.013	1	ENSMUST00000162540	ENSMUSG00000063458	protein_coding	gap	chr14-22684893-23055954	0
1700112E06Rik	chr14-23015302-23015802	0.368707	0.108438	0.062	0.057	1	ENSMUST00000162540	ENSMUSG00000063458	protein_coding	gap	chr14-22684893-23055954	0
1700112E06Rik	chr14-23052782-23053282	0.122016	-0.301772	0.017	0.021	1	ENSMUST00000162540	ENSMUSG00000063458	protein_coding	gap	chr14-22684893-23055954	0
1700112E06Rik	chr14-23146966-23147466	0.478045	-0.12436	0.02	0.021	1	ENSMUST00000162540	ENSMUSG00000063458	protein_coding	utr	chr14-23055955-23056085	90880
1700112E06Rik	chr14-23157933-23158433	0.469461	-0.120165	0.022	0.022	1	ENSMUST00000162540	ENSMUSG00000063458	protein_coding	utr	chr14-23055955-23056085	101847
1700112J16Rik	chr7-67199332-67199832	0.415557	-0.122078	0.025	0.027	1	ENSMUST00000181631	ENSMUSG00000097527	lincRNA	exon	chr7-67204082-67205398	4249
1700112J16Rik	chr7-67221712-67222212	0.271355	0.286875	0.014	0.012	1	ENSMUST00000181631	ENSMUSG00000097527	lincRNA	gap	chr7-67220181-67222243	0
1700113H08Rik	chr10-87057456-87057956	0.0104498	0.387035	0.037	0.029	1	ENSMUST00000189456	ENSMUSG00000047129	protein_coding	exon	chr10-87058045-87058159	88
1700113H08Rik	chr10-87058175-87058675	0.261698	0.144195	0.051	0.048	1	ENSMUST00000189456	ENSMUSG00000047129	protein_coding	gap	chr10-87058160-87073957	0
1700113H08Rik	chr10-87280063-87280563	0.504085	0.100929	0.039	0.036	1	ENSMUST00000189456	ENSMUSG00000047129	protein_coding	utr	chr10-87230443-87230589	49473
1700113H08Rik	chr10-87284311-87284811	0.266114	0.169039	0.036	0.033	1	ENSMUST00000189456	ENSMUSG00000047129	protein_coding	utr	chr10-87230443-87230589	53721
1700116B05Rik	chr16-50784270-50784770	0.0518271	0.355943	0.026	0.021	1	ENSMUST00000173461	ENSMUSG00000092276	lincRNA	exon	chr16-50783827-50784091	178
1700116B05Rik	chr16-50799329-50799829	0.296759	0.146246	0.041	0.038	1	ENSMUST00000173461	ENSMUSG00000092276	lincRNA	exon	chr16-50783827-50784091	15237
1700116B05Rik	chr16-51117647-51118147	0.630235	0.106304	0.018	0.017	1	ENSMUST00000173461	ENSMUSG00000092276	lincRNA	exon	chr16-50783827-50784091	333555
1700116B05Rik	chr16-51315488-51315988	0.135997	0.290495	0.021	0.017	1	ENSMUST00000173461	ENSMUSG00000092276	lincRNA	exon	chr16-50783827-50784091	531396
1700120C14Rik	chr15-99259242-99259742	0.111485	0.249448	0.039	0.031	1	ENSMUST00000187967	ENSMUSG00000100599	processed_transcript	gap	chr15-99252002-99261624	0
1700120C14Rik	chr15-99265642-99266142	0.230312	-0.109255	0.066	0.07	1	ENSMUST00000187967	ENSMUSG00000100599	processed_transcript	exon	chr15-99261952-99262044	3597
1700121N20Rik	chr12-106468239-106468739	0.244922	0.137564	0.061	0.054	1	ENSMUST00000167922	ENSMUSG00000092066	lincRNA	exon	chr12-106447325-106447666	20572
1700121N20Rik	chr12-106476992-106477492	0.099391	-0.286201	0.02	0.024	1	ENSMUST00000167922	ENSMUSG00000092066	lincRNA	exon	chr12-106447325-106447666	29325
1700121N20Rik	chr12-106480447-106480947	0.0165926	-0.262579	0.051	0.058	1	ENSMUST00000167922	ENSMUSG00000092066	lincRNA	exon	chr12-106447325-106447666	32780
1700121N20Rik	chr12-106501721-106502221	0.242716	0.219559	0.025	0.022	1	ENSMUST00000167922	ENSMUSG00000092066	lincRNA	exon	chr12-106447325-106447666	54054
1700122E12Rik	chr8-84847382-84847882	0.013648	0.392507	0.036	0.029	1	ENSMUST00000147538	ENSMUSG00000087685	processed_transcript	gap	chr8-84847321-84848069	0
1700122O11Rik	chr17-48041329-48041829	0.0963892	0.370967	0.019	0.014	1	ENSMUST00000178823	ENSMUSG00000094928	protein_coding	exon	chr17-48038214-48038293	3035
1700123I01Rik	chr19-6206637-6207137	0.0739335	0.328002	0.026	0.02	1	ENSMUST00000113528	ENSMUSG00000024786	protein_coding	gap	chr19-6206264-6211603	0
1700123L14Rik	chr6-96165173-96165673	0.0508704	-0.173719	0.082	0.087	1	ENSMUST00000090061	ENSMUSG00000072878	protein_coding	cds	chr6-96164739-96166061	0
1700123M08Rik	chr4-11966952-11967452	0.302318	0.286836	0.012	0.01	1	ENSMUST00000154194	ENSMUSG00000085614	processed_transcript	gap	chr4-11966684-11993864	0
1700123O12Rik	chr4-10351813-10352313	0.0592439	0.302924	0.033	0.027	1	ENSMUST00000145856	ENSMUSG00000086080	lincRNA	exon	chr4-10479962-10480139	127648
1700123O12Rik	chr4-10707652-10708152	0.305082	-0.159589	0.025	0.027	1	ENSMUST00000146783	ENSMUSG00000086080	lincRNA	gap	chr4-10508099-10742887	0
1700123O12Rik	chr4-10767684-10768184	0.0343064	-0.192141	0.071	0.081	1	ENSMUST00000146783	ENSMUSG00000086080	lincRNA	gap	chr4-10746088-10776503	0
1700123O12Rik	chr4-10691646-10692146	0.0826394	0.308275	0.026	0.023	1	ENSMUST00000146783	ENSMUSG00000086080	lincRNA	gap	chr4-10508099-10742887	0
1700123O12Rik	chr4-10697298-10697798	0.216251	-0.199705	0.024	0.028	1	ENSMUST00000146783	ENSMUSG00000086080	lincRNA	gap	chr4-10508099-10742887	0
1700123O12Rik	chr4-10743348-10743848	0.137251	0.272367	0.026	0.021	1	ENSMUST00000146783	ENSMUSG00000086080	lincRNA	gap	chr4-10743065-10745985	0
1700123O12Rik	chr4-10744920-10745420	0.0113896	-0.553174	0.013	0.019	1	ENSMUST00000146783	ENSMUSG00000086080	lincRNA	gap	chr4-10743065-10745985	0
1700123O12Rik	chr4-10804670-10805170	0.0695105	0.476734	0.012	0.009	1	ENSMUST00000146783	ENSMUSG00000086080	lincRNA	exon	chr4-10797642-10797811	6858
1700123O12Rik	chr4-10835210-10835710	0.433421	-0.170409	0.014	0.015	1	ENSMUST00000146783	ENSMUSG00000086080	lincRNA	exon	chr4-10797642-10797811	37398
1700123O20Rik	chr14-54687196-54687696	0.423914	0.115393	0.046	0.045	1	ENSMUST00000038539	ENSMUSG00000040822	protein_coding	gap	chr14-54687121-54689803	0
1700125H20Rik	chr11-85170004-85170504	0.129169	0.116503	0.13	0.121	1	ENSMUST00000100681	ENSMUSG00000018479	protein_coding	utr	chr11-85170404-85170432	0
1700125H20Rik	chr11-85182944-85183444	0.233113	0.133343	0.066	0.06	1	ENSMUST00000100681	ENSMUSG00000018479	protein_coding	utr	chr11-85180972-85181145	1798
1700126A01Rik	chr1-57120624-57121124	0.350358	0.14568	0.035	0.033	1	ENSMUST00000185283	ENSMUSG00000099945	lincRNA	exon	chr1-57127340-57129400	6215
1700128A07Rik	chr14-106439246-106439746	0.0840659	0.244359	0.037	0.032	1	ENSMUST00000186311	ENSMUSG00000099794	lincRNA	gap	chr14-106424085-106443310	0
1700128A07Rik	chr14-106483633-106484133	0.161043	0.203624	0.038	0.033	1	ENSMUST00000186643	ENSMUSG00000099794	lincRNA	gap	chr14-106443405-106486402	0
1700128A07Rik	chr14-106607013-106607513	0.65717	0.107428	0.014	0.012	1	ENSMUST00000186311	ENSMUSG00000099794	lincRNA	exon	chr14-106486403-106486520	120492
1700128A07Rik	chr14-106765821-106766321	0.410036	-0.179386	0.013	0.015	1	ENSMUST00000186311	ENSMUSG00000099794	lincRNA	exon	chr14-106486403-106486520	279300
1700129C05Rik	chr14-59084339-59084839	0.642778	0.125984	0.011	0.01	1	ENSMUST00000022548	ENSMUSG00000021977	protein_coding	utr	chr14-59133040-59133403	48200
1810007C17Rik	chr12-49480602-49481102	0.0151474	0.645187	0.013	0.008	1	ENSMUST00000187665	ENSMUSG00000100844	lincRNA	exon	chr12-49480530-49480862	0
1810007C17Rik	chr12-49827993-49828493	0.106915	0.109302	0.172	0.163	1	ENSMUST00000187665	ENSMUSG00000100844	lincRNA	exon	chr12-49480530-49480862	347130
1810007C17Rik	chr12-49830582-49831082	0.393137	-0.140818	0.024	0.024	1	ENSMUST00000187665	ENSMUSG00000100844	lincRNA	exon	chr12-49480530-49480862	349719
1810008I18Rik	chr7-65822213-65822713	0.00606871	0.587236	0.02	0.013	1	ENSMUST00000185464	ENSMUSG00000100094	lincRNA	exon	chr7-65804031-65806449	15763
1810008I18Rik	chr7-65780697-65781197	0.40041	0.108293	0.052	0.05	1	ENSMUST00000187848	ENSMUSG00000100094	lincRNA	exon	chr7-65803111-65803149	21913
1810008I18Rik	chr7-65786920-65787420	0.372347	-0.125778	0.032	0.034	1	ENSMUST00000187848	ENSMUSG00000100094	lincRNA	exon	chr7-65803111-65803149	15690
1810008I18Rik	chr7-65810767-65811267	0.12867	0.258511	0.029	0.024	1	ENSMUST00000185464	ENSMUSG00000100094	lincRNA	exon	chr7-65804031-65806449	4317
1810011O10Rik	chr8-24437684-24438184	0.248141	0.174099	0.037	0.032	1	ENSMUST00000052622	ENSMUSG00000056313	protein_coding	utr	chr8-24437180-24438575	0
1810011O10Rik	chr8-24438188-24438688	0.0976492	0.237675	0.043	0.037	1	ENSMUST00000052622	ENSMUSG00000056313	protein_coding	cds	chr8-24438576-24438896	0
1810012K16Rik	chr8-22399091-22399591	0.0111253	0.767775	0.011	0.006	1	ENSMUST00000190830	ENSMUSG00000099825	lincRNA	gap	chr8-22399279-22399444	0
1810013L24Rik	chr16-8830789-8831289	0.210277	0.107697	0.111	0.103	1	ENSMUST00000023150	ENSMUSG00000022507	protein_coding	gap	chr16-8830686-8831320	0
1810013L24Rik	chr16-8831380-8831880	0.199815	-0.200526	0.026	0.029	1	ENSMUST00000023150	ENSMUSG00000022507	protein_coding	cds	chr16-8831321-8831401	0
1810013L24Rik	chr16-8864243-8864743	0.00229061	0.884181	0.012	0.007	1	ENSMUST00000023150	ENSMUSG00000022507	protein_coding	utr	chr16-8856039-8858916	5326
1810024B03Rik	chr2-127166208-127166708	0.0862141	0.35228	0.02	0.015	1	ENSMUST00000056146	ENSMUSG00000044145	protein_coding	utr	chr2-127186355-127186674	19646
1810026B05Rik	chr7-73559171-73559671	0.0269617	0.345988	0.037	0.029	1	ENSMUST00000184587	ENSMUSG00000098496	processed_transcript	exon	chr7-73558039-73558395	775
1810026B05Rik	chr7-73588305-73588805	0.583081	0.160287	0.011	0.01	1	ENSMUST00000184587	ENSMUSG00000098496	processed_transcript	exon	chr7-73558039-73558395	29909
1810026B05Rik	chr7-73594445-73594945	0.0769418	0.451347	0.014	0.011	1	ENSMUST00000184587	ENSMUSG00000098496	processed_transcript	exon	chr7-73558039-73558395	36049
1810026B05Rik	chr7-73595083-73595583	0.00320007	0.219953	0.136	0.116	1	ENSMUST00000184587	ENSMUSG00000098496	processed_transcript	exon	chr7-73558039-73558395	36687
1810026B05Rik	chr7-73595631-73596131	0.087037	0.373028	0.02	0.015	1	ENSMUST00000184587	ENSMUSG00000098496	processed_transcript	exon	chr7-73558039-73558395	37235
1810026B05Rik	chr7-73614745-73615245	0.0697117	0.335179	0.028	0.021	1	ENSMUST00000184587	ENSMUSG00000098496	processed_transcript	exon	chr7-73558039-73558395	56349
1810026B05Rik	chr7-73615883-73616383	0.0796284	-0.342736	0.018	0.02	1	ENSMUST00000184587	ENSMUSG00000098496	processed_transcript	exon	chr7-73558039-73558395	57487
1810026B05Rik	chr7-73616929-73617429	0.134727	0.148945	0.084	0.079	1	ENSMUST00000184587	ENSMUSG00000098496	processed_transcript	exon	chr7-73558039-73558395	58533
1810026B05Rik	chr7-73618981-73619481	0.00598724	0.360028	0.052	0.043	1	ENSMUST00000184587	ENSMUSG00000098496	processed_transcript	exon	chr7-73558039-73558395	60585
1810026B05Rik	chr7-73644211-73644711	0.151407	0.154636	0.07	0.065	1	ENSMUST00000184587	ENSMUSG00000098496	processed_transcript	exon	chr7-73558039-73558395	85815
1810030O07Rik	chrX-12645779-12646279	0.34497	0.219469	0.016	0.014	1	ENSMUST00000060108	ENSMUSG00000044148	protein_coding	utr	chrX-12654879-12656486	8599
1810032O08Rik	chr11-116671897-116672397	0.0178383	0.514096	0.019	0.014	1	ENSMUST00000144049	ENSMUSG00000020812	protein_coding	cds	chr11-116672278-116672355	0
1810037I17Rik	chr3-122923910-122924410	0.000398801	-0.156936	0.251	0.269	1	ENSMUST00000106429	ENSMUSG00000054091	protein_coding	utr	chr3-122924242-122924459	0
1810037I17Rik	chr3-122926356-122926856	0.231855	-0.205076	0.022	0.025	1	ENSMUST00000106429	ENSMUSG00000054091	protein_coding	utr	chr3-122925480-122926194	161
1810041L15Rik	chr15-84469326-84469826	0.126087	-0.10708	0.113	0.119	1	ENSMUST00000080751	ENSMUSG00000062760	protein_coding	exon	chr15-84446999-84447097	22228
1810041L15Rik	chr15-84481364-84481864	0.1686	-0.143794	0.057	0.062	1	ENSMUST00000080751	ENSMUSG00000062760	protein_coding	exon	chr15-84446999-84447097	34266
1810041L15Rik	chr15-84482681-84483181	0.00633521	-0.174394	0.14	0.153	1	ENSMUST00000080751	ENSMUSG00000062760	protein_coding	exon	chr15-84446999-84447097	35583
1810041L15Rik	chr15-84483568-84484068	0.13021	-0.267859	0.022	0.024	1	ENSMUST00000080751	ENSMUSG00000062760	protein_coding	exon	chr15-84446999-84447097	36470
1810041L15Rik	chr15-84484178-84484678	0.13328	-0.330311	0.013	0.016	1	ENSMUST00000080751	ENSMUSG00000062760	protein_coding	exon	chr15-84446999-84447097	37080
1810041L15Rik	chr15-84485416-84485916	0.000303941	-0.242631	0.126	0.148	1	ENSMUST00000080751	ENSMUSG00000062760	protein_coding	exon	chr15-84446999-84447097	38318
1810041L15Rik	chr15-84408058-84408558	0.400695	0.246526	0.011	0.008	1	ENSMUST00000189994	ENSMUSG00000062760	protein_coding	gap	chr15-84406764-84417099	0
1810041L15Rik	chr15-84408601-84409101	0.394798	0.161745	0.025	0.021	1	ENSMUST00000189994	ENSMUSG00000062760	protein_coding	gap	chr15-84406764-84417099	0
1810041L15Rik	chr15-84414261-84414761	0.353244	0.12406	0.051	0.044	1	ENSMUST00000189994	ENSMUSG00000062760	protein_coding	gap	chr15-84406764-84417099	0
1810041L15Rik	chr15-84417760-84418260	0.0260046	0.363666	0.034	0.026	1	ENSMUST00000189994	ENSMUSG00000062760	protein_coding	gap	chr15-84417314-84420136	0
1810041L15Rik	chr15-84440782-84441282	0.0682808	0.26348	0.04	0.034	1	ENSMUST00000189994	ENSMUSG00000062760	protein_coding	gap	chr15-84420233-84446361	0
1810041L15Rik	chr15-84446252-84446752	0.226802	-0.153683	0.036	0.041	1	ENSMUST00000189994	ENSMUSG00000062760	protein_coding	utr	chr15-84446362-84446610	0
1810041L15Rik	chr15-84449257-84449757	0.0529674	0.4657	0.015	0.01	1	ENSMUST00000080751	ENSMUSG00000062760	protein_coding	exon	chr15-84446999-84447097	2159
1810041L15Rik	chr15-84458863-84459363	0.487	0.185102	0.013	0.011	1	ENSMUST00000080751	ENSMUSG00000062760	protein_coding	exon	chr15-84446999-84447097	11765
1810041L15Rik	chr15-84466389-84466889	0.259716	0.216193	0.025	0.023	1	ENSMUST00000080751	ENSMUSG00000062760	protein_coding	exon	chr15-84446999-84447097	19291
1810044D09Rik	chr6-91441212-91441712	0.594714	0.126071	0.018	0.016	1	ENSMUST00000186472	ENSMUSG00000100680	lincRNA	gap	chr6-91441159-91441441	0
1810046K07Rik	chr9-51292652-51293152	0.129741	0.194303	0.049	0.042	1	ENSMUST00000181366	ENSMUSG00000036027	protein_coding	gap	chr9-51291846-51294956	0
1810046K07Rik	chr9-51335240-51335740	0.41024	-0.103331	0.036	0.037	1	ENSMUST00000039959	ENSMUSG00000036027	protein_coding	exon	chr9-51328808-51328917	6322
1810049J17Rik	chr15-12298262-12298762	0.571896	0.165181	0.011	0.009	1	ENSMUST00000180521	ENSMUSG00000097221	protein_coding	cds	chr15-12321438-12321899	22675
1810049J17Rik	chr15-12321805-12322305	0.317419	0.103983	0.08	0.077	1	ENSMUST00000180521	ENSMUSG00000097221	protein_coding	cds	chr15-12321438-12321899	0
1810053B23Rik	chr16-93092472-93092972	0.417381	0.182232	0.018	0.015	1	ENSMUST00000188056	ENSMUSG00000100277	processed_transcript	exon	chr16-93343281-93344371	250308
1810053B23Rik	chr16-93093114-93093614	0.0601229	0.457813	0.016	0.012	1	ENSMUST00000188056	ENSMUSG00000100277	processed_transcript	exon	chr16-93343281-93344371	249666
1810053B23Rik	chr16-93246751-93247251	0.2092	0.216799	0.028	0.026	1	ENSMUST00000188056	ENSMUSG00000100277	processed_transcript	exon	chr16-93343281-93344371	96029
1810053B23Rik	chr16-93335262-93335762	0.0123126	-0.350925	0.032	0.04	1	ENSMUST00000188056	ENSMUSG00000100277	processed_transcript	exon	chr16-93343281-93344371	7518
1810053B23Rik	chr16-93369372-93369872	0.026276	-0.53001	0.011	0.015	1	ENSMUST00000185555	ENSMUSG00000100277	processed_transcript	exon	chr16-93359454-93359543	9828
1810055G02Rik	chr19-3708541-3709041	0.0928183	0.237835	0.045	0.037	1	ENSMUST00000039048	ENSMUSG00000035372	protein_coding	gap	chr19-3708437-3714403	0
1810055G02Rik	chr19-3718717-3719217	0.0357141	-0.194338	0.074	0.083	1	ENSMUST00000039048	ENSMUSG00000035372	protein_coding	utr	chr19-3717594-3717881	835
1810055G02Rik	chr19-3719937-3720437	0.180027	-0.373531	0.009	0.01	1	ENSMUST00000039048	ENSMUSG00000035372	protein_coding	utr	chr19-3717594-3717881	2055
1810055G02Rik	chr19-3721742-3722242	0.0524413	-0.246015	0.038	0.044	1	ENSMUST00000039048	ENSMUSG00000035372	protein_coding	utr	chr19-3717594-3717881	3860
1810058I24Rik	chr6-35259477-35259977	0.0025074	-0.538291	0.02	0.027	1	ENSMUST00000152147	ENSMUSG00000073155	lincRNA	gap	chr6-35252783-35260409	0
1810058I24Rik	chr6-35255206-35255706	0.446899	0.175721	0.017	0.015	1	ENSMUST00000152147	ENSMUSG00000073155	lincRNA	gap	chr6-35252783-35260409	0
1810058I24Rik	chr6-35255929-35256429	0.407493	0.240561	0.01	0.008	1	ENSMUST00000152147	ENSMUSG00000073155	lincRNA	gap	chr6-35252783-35260409	0
1810058I24Rik	chr6-35252963-35253463	0.375796	0.104457	0.067	0.063	1	ENSMUST00000152147	ENSMUSG00000073155	lincRNA	gap	chr6-35252783-35260409	0
1810059C17Rik	chr2-18054095-18054595	0.508526	0.121566	0.027	0.023	1	ENSMUST00000125173	ENSMUSG00000086340	processed_transcript	gap	chr2-18054477-18055712	0
1810059C17Rik	chr2-18055421-18055921	0.255428	0.192344	0.03	0.027	1	ENSMUST00000125173	ENSMUSG00000086340	processed_transcript	gap	chr2-18055822-18056519	0
1810062G17Rik	chr3-36487795-36488295	0.401372	-0.182706	0.014	0.015	1	ENSMUST00000029268	ENSMUSG00000027713	protein_coding	utr	chr3-36481977-36482299	5495
1810063I02Rik	chr11-59927122-59927622	0.0321221	-0.244538	0.047	0.053	1	ENSMUST00000130205	ENSMUSG00000085551	lincRNA	exon	chr11-59921725-59921889	5232
1810063I02Rik	chr11-59928632-59929132	0.0912378	-0.2893	0.021	0.024	1	ENSMUST00000130205	ENSMUSG00000085551	lincRNA	exon	chr11-59921725-59921889	6742
1810063I02Rik	chr11-59933759-59934259	0.313089	0.152442	0.038	0.033	1	ENSMUST00000130205	ENSMUSG00000085551	lincRNA	exon	chr11-59921725-59921889	11869
2010013B24Rik	chr6-145303493-145303993	0.703241	0.108029	0.013	0.012	1	ENSMUST00000126922	ENSMUSG00000087277	lincRNA	gap	chr6-145303471-145308523	0
2010015M23Rik	chr11-88028329-88028829	0.245251	0.145413	0.056	0.052	1	ENSMUST00000181900	ENSMUSG00000096983	lincRNA	exon	chr11-88039578-88040036	10748
2010107E04Rik	chr12-111946652-111947152	0.0822711	0.241337	0.044	0.036	1	ENSMUST00000021719	ENSMUSG00000021290	protein_coding	utr	chr12-111961376-111961509	14223
2010107E04Rik	chr12-111966202-111966702	0.0235703	0.300757	0.05	0.045	1	ENSMUST00000021719	ENSMUSG00000021290	protein_coding	gap	chr12-111963354-111966923	0
2010107G12Rik	chr6-34955449-34955949	0.0412866	0.296098	0.039	0.032	1	ENSMUST00000147169	ENSMUSG00000029847	protein_coding	cds	chr6-34955870-34955903	0
2010107G12Rik	chr6-34988077-34988577	0.44138	0.174747	0.016	0.014	1	ENSMUST00000144079	ENSMUSG00000029847	protein_coding	exon	chr6-34978909-34979054	9022
2010107G12Rik	chr6-34998927-34999427	0.0381803	-0.160378	0.097	0.103	1	ENSMUST00000144079	ENSMUSG00000029847	protein_coding	exon	chr6-34978909-34979054	19872
2010107G23Rik	chr10-62105100-62105600	0.480623	0.131161	0.025	0.022	1	ENSMUST00000125704	ENSMUSG00000020083	protein_coding	utr	chr10-62107655-62108853	2054
2010109I03Rik	chr15-74896265-74896765	0.158338	0.265018	0.023	0.019	1	ENSMUST00000190826	ENSMUSG00000063522	protein_coding	gap	chr15-74880774-74896955	0
2010109I03Rik	chr15-74919448-74919948	0.315193	-0.250643	0.009	0.011	1	ENSMUST00000190826	ENSMUSG00000063522	protein_coding	exon	chr15-74896956-74897021	22426
2010111I01Rik	chr13-63297897-63298397	0.0630912	0.5423	0.011	0.008	1	ENSMUST00000159152	ENSMUSG00000021458	protein_coding	gap	chr13-63296945-63298711	0
2010111I01Rik	chr13-63260659-63261159	0.0369517	0.201278	0.089	0.078	1	ENSMUST00000091560	ENSMUSG00000021458	protein_coding	gap	chr13-63240332-63282141	0
2010111I01Rik	chr13-62997913-62998413	0.532751	0.168878	0.012	0.01	1	ENSMUST00000091560	ENSMUSG00000021458	protein_coding	exon	chr13-63014934-63015963	16520
2010111I01Rik	chr13-63289620-63290120	0.639373	0.126088	0.014	0.012	1	ENSMUST00000159152	ENSMUSG00000021458	protein_coding	gap	chr13-63282259-63296857	0
2010111I01Rik	chr13-62989897-62990397	0.0316518	-0.436302	0.015	0.02	1	ENSMUST00000091560	ENSMUSG00000021458	protein_coding	exon	chr13-63014934-63015963	24536
2010111I01Rik	chr13-63258138-63258638	0.00258701	0.970593	0.01	0.006	1	ENSMUST00000091560	ENSMUSG00000021458	protein_coding	gap	chr13-63240332-63282141	0
2010111I01Rik	chr13-63272659-63273159	0.483421	-0.122509	0.019	0.02	1	ENSMUST00000091560	ENSMUSG00000021458	protein_coding	gap	chr13-63240332-63282141	0
2010111I01Rik	chr13-63064634-63065134	0.0291884	0.212316	0.088	0.073	1	ENSMUST00000091560	ENSMUSG00000021458	protein_coding	gap	chr13-63061195-63068039	0
2010111I01Rik	chr13-62964627-62965127	0.0337803	-0.140058	0.122	0.132	1	ENSMUST00000091560	ENSMUSG00000021458	protein_coding	exon	chr13-63014934-63015963	49806
2010111I01Rik	chr13-63260054-63260554	0.0115747	0.610836	0.017	0.011	1	ENSMUST00000091560	ENSMUSG00000021458	protein_coding	gap	chr13-63240332-63282141	0
2010111I01Rik	chr13-63032225-63032725	0.306512	-0.159971	0.026	0.028	1	ENSMUST00000091560	ENSMUSG00000021458	protein_coding	gap	chr13-63015964-63033022	0
2010111I01Rik	chr13-63037835-63038335	0.377464	-0.198503	0.013	0.014	1	ENSMUST00000091560	ENSMUSG00000021458	protein_coding	gap	chr13-63033190-63061034	0
2010111I01Rik	chr13-63239795-63240295	0.414785	0.120729	0.042	0.038	1	ENSMUST00000091560	ENSMUSG00000021458	protein_coding	cds	chr13-63240257-63240331	0
2010204K13Rik	chrX-7416389-7416889	0.00612168	-0.215684	0.092	0.105	1	ENSMUST00000154346	ENSMUSG00000063018	processed_transcript	gap	chrX-7412533-7420927	0
2010204K13Rik	chrX-7422772-7423272	0.100591	0.245538	0.037	0.03	1	ENSMUST00000150671	ENSMUSG00000063018	processed_transcript	gap	chrX-7412533-7424129	0
2010204K13Rik	chrX-7428779-7429279	0.0890052	-0.109375	0.13	0.14	1	ENSMUST00000150671	ENSMUSG00000063018	processed_transcript	gap	chrX-7424285-7429506	0
2010204K13Rik	chrX-7473728-7474228	0.0330867	-0.431186	0.014	0.018	1	ENSMUST00000150671	ENSMUSG00000063018	processed_transcript	exon	chrX-7445009-7445143	28584
2010300C02Rik	chr1-37586084-37586584	0.00126794	0.936549	0.012	0.008	1	ENSMUST00000162875	ENSMUSG00000026090	protein_coding	utr	chr1-37611677-37612256	25092
2010300C02Rik	chr1-37636105-37636605	0.292068	0.284386	0.012	0.009	1	ENSMUST00000162875	ENSMUSG00000026090	protein_coding	gap	chr1-37631952-37637860	0
2010300C02Rik	chr1-37678277-37678777	0.502354	0.131436	0.024	0.022	1	ENSMUST00000162875	ENSMUSG00000026090	protein_coding	gap	chr1-37644641-37719569	0
2010300C02Rik	chr1-37719670-37720170	0.000501041	-0.62219	0.018	0.025	1	ENSMUST00000162875	ENSMUSG00000026090	protein_coding	utr	chr1-37719570-37720085	0
2010300F17Rik	chr11-96735839-96736339	0.0673562	0.336813	0.024	0.019	1	ENSMUST00000181758	ENSMUSG00000097289	lincRNA	gap	chr11-96714409-96746370	0
2010308F09Rik	chrX-13230593-13231093	0.028033	-0.142549	0.128	0.14	1	ENSMUST00000186827	ENSMUSG00000100714	lincRNA	exon	chrX-13234641-13234947	3547
2010308F09Rik	chrX-13236101-13236601	0.182698	0.129278	0.086	0.079	1	ENSMUST00000186931	ENSMUSG00000100714	lincRNA	gap	chrX-13235500-13247504	0
2010308F09Rik	chrX-13241333-13241833	0.173039	-0.130652	0.066	0.07	1	ENSMUST00000186931	ENSMUSG00000100714	lincRNA	gap	chrX-13235500-13247504	0
2010320O07Rik	chr18-38211006-38211506	0.114651	0.255922	0.035	0.029	1	ENSMUST00000160935	ENSMUSG00000089983	processed_transcript	gap	chr18-38209871-38228719	0
2010320O07Rik	chr18-38213364-38213864	0.00620744	-0.227559	0.085	0.099	1	ENSMUST00000160935	ENSMUSG00000089983	processed_transcript	gap	chr18-38209871-38228719	0
2010320O07Rik	chr18-38216069-38216569	0.0157789	-0.264432	0.049	0.061	1	ENSMUST00000160935	ENSMUSG00000089983	processed_transcript	gap	chr18-38209871-38228719	0
2010320O07Rik	chr18-38216847-38217347	0.0990145	-0.114895	0.111	0.119	1	ENSMUST00000160935	ENSMUSG00000089983	processed_transcript	gap	chr18-38209871-38228719	0
2210008F06Rik	chr11-77490994-77491494	0.000721841	0.194417	0.213	0.187	1	ENSMUST00000180805	ENSMUSG00000097165	lincRNA	exon	chr11-77490486-77491409	0
2210008F06Rik	chr11-77491956-77492456	0.311702	0.190767	0.027	0.023	1	ENSMUST00000180805	ENSMUSG00000097165	lincRNA	exon	chr11-77490486-77491409	546
2210011C24Rik	chr8-84012626-84013126	0.532326	0.151873	0.016	0.015	1	ENSMUST00000185457	ENSMUSG00000074217	protein_coding	exon	chr8-84012114-84012171	454
2210011C24Rik	chr8-84009803-84010303	0.248914	-0.110525	0.059	0.063	1	ENSMUST00000190457	ENSMUSG00000074217	protein_coding	utr	chr8-84010222-84010477	0
2210013O21Rik	chrX-153719540-153720040	0.210459	0.35459	0.011	0.008	1	ENSMUST00000140575	ENSMUSG00000086316	processed_transcript	exon	chrX-153723590-153723937	3549
2210016F16Rik	chr13-58387853-58388353	0.16593	0.202003	0.037	0.033	1	ENSMUST00000022032	ENSMUSG00000021550	protein_coding	exon	chr13-58384824-58385225	2627
2210016L21Rik	chr5-114941943-114942443	0.198224	0.102435	0.126	0.117	1	ENSMUST00000131427	ENSMUSG00000029559	protein_coding	cds	chr5-114942210-114942355	0
2210018M11Rik	chr7-98588973-98589473	0.196282	0.362477	0.01	0.008	1	ENSMUST00000038359	ENSMUSG00000035401	protein_coding	utr	chr7-98590615-98590689	1141
2210018M11Rik	chr7-98635685-98636185	0.364064	0.176409	0.022	0.02	1	ENSMUST00000038359	ENSMUSG00000035401	protein_coding	gap	chr7-98630408-98637260	0
2210018M11Rik	chr7-98657297-98657797	0.0369188	0.437878	0.021	0.016	1	ENSMUST00000038359	ENSMUSG00000035401	protein_coding	exon	chr7-98656474-98656569	727
2210404O09Rik	chr17-21909466-21909966	0.164798	0.164247	0.061	0.053	1	ENSMUST00000190066	ENSMUSG00000078546	protein_coding	utr	chr17-21909554-21909926	0
2210406O10Rik	chr5-36458856-36459356	0.0410879	0.494433	0.014	0.011	1	ENSMUST00000151434	ENSMUSG00000039563	processed_transcript	gap	chr5-36458760-36464514	0
2210408F21Rik	chr6-31221537-31222037	0.520947	-0.113535	0.018	0.02	1	ENSMUST00000155345	ENSMUSG00000087380	processed_transcript	gap	chr6-31220520-31244104	0
2210408F21Rik	chr6-31220145-31220645	0.00335615	0.200617	0.161	0.145	1	ENSMUST00000155345	ENSMUSG00000087380	processed_transcript	gap	chr6-31220520-31244104	0
2210408F21Rik	chr6-31260595-31261095	0.159097	-0.124385	0.079	0.084	1	ENSMUST00000155345	ENSMUSG00000087380	processed_transcript	gap	chr6-31244359-31277847	0
2210408F21Rik	chr6-31284355-31284855	0.146843	-0.271096	0.018	0.02	1	ENSMUST00000155345	ENSMUSG00000087380	processed_transcript	gap	chr6-31277956-31285002	0
2210408F21Rik	chr6-31285123-31285623	0.0312001	-0.215946	0.059	0.069	1	ENSMUST00000155345	ENSMUSG00000087380	processed_transcript	gap	chr6-31285121-31328288	0
2210408F21Rik	chr6-31286287-31286787	0.0114409	0.746729	0.011	0.007	1	ENSMUST00000155345	ENSMUSG00000087380	processed_transcript	gap	chr6-31285121-31328288	0
2210408F21Rik	chr6-31288284-31288784	0.0349229	0.334286	0.034	0.028	1	ENSMUST00000155345	ENSMUSG00000087380	processed_transcript	gap	chr6-31285121-31328288	0
2210408F21Rik	chr6-31288788-31289288	0.00787486	0.44866	0.031	0.025	1	ENSMUST00000155345	ENSMUSG00000087380	processed_transcript	gap	chr6-31285121-31328288	0
2210408F21Rik	chr6-31321878-31322378	0.313948	-0.257605	0.01	0.011	1	ENSMUST00000155345	ENSMUSG00000087380	processed_transcript	gap	chr6-31285121-31328288	0
2210408F21Rik	chr6-31253190-31253690	0.0119389	0.383333	0.036	0.028	1	ENSMUST00000155345	ENSMUSG00000087380	processed_transcript	gap	chr6-31244359-31277847	0
2210408F21Rik	chr6-31276806-31277306	0.118763	-0.375649	0.011	0.013	1	ENSMUST00000155345	ENSMUSG00000087380	processed_transcript	gap	chr6-31244359-31277847	0
2210408F21Rik	chr6-31306347-31306847	0.208662	-0.153133	0.041	0.045	1	ENSMUST00000155345	ENSMUSG00000087380	processed_transcript	gap	chr6-31285121-31328288	0
2210408F21Rik	chr6-31307135-31307635	0.431975	0.185503	0.017	0.015	1	ENSMUST00000155345	ENSMUSG00000087380	processed_transcript	gap	chr6-31285121-31328288	0
2210408F21Rik	chr6-31313962-31314462	0.355428	-0.156798	0.021	0.022	1	ENSMUST00000155345	ENSMUSG00000087380	processed_transcript	gap	chr6-31285121-31328288	0
2210408F21Rik	chr6-31317909-31318409	0.384801	0.164829	0.026	0.022	1	ENSMUST00000155345	ENSMUSG00000087380	processed_transcript	gap	chr6-31285121-31328288	0
2210408F21Rik	chr6-31318437-31318937	0.252434	-0.126353	0.05	0.051	1	ENSMUST00000155345	ENSMUSG00000087380	processed_transcript	gap	chr6-31285121-31328288	0
2210408F21Rik	chr6-31323800-31324300	0.00265147	0.836843	0.013	0.007	1	ENSMUST00000155345	ENSMUSG00000087380	processed_transcript	gap	chr6-31285121-31328288	0
2210408F21Rik	chr6-31330252-31330752	0.0892487	0.106981	0.186	0.174	1	ENSMUST00000155345	ENSMUSG00000087380	processed_transcript	gap	chr6-31328361-31335990	0
2210408F21Rik	chr6-31330850-31331350	0.388855	-0.14925	0.021	0.023	1	ENSMUST00000155345	ENSMUSG00000087380	processed_transcript	gap	chr6-31328361-31335990	0
2210408F21Rik	chr6-31332154-31332654	0.0116597	0.606599	0.016	0.011	1	ENSMUST00000155345	ENSMUSG00000087380	processed_transcript	gap	chr6-31328361-31335990	0
2210408F21Rik	chr6-31345295-31345795	0.018925	0.491291	0.021	0.015	1	ENSMUST00000155345	ENSMUSG00000087380	processed_transcript	exon	chr6-31337230-31337404	7890
2210408I21Rik	chr13-77135272-77135772	0.0562203	0.127942	0.17	0.151	1	ENSMUST00000168779	ENSMUSG00000071252	protein_coding	utr	chr13-77135540-77135630	0
2210408I21Rik	chr13-77396844-77397344	0.583184	0.135505	0.014	0.014	1	ENSMUST00000168779	ENSMUSG00000071252	protein_coding	gap	chr13-77334364-77612526	0
2210408I21Rik	chr13-77400688-77401188	0.333132	0.261721	0.012	0.009	1	ENSMUST00000168779	ENSMUSG00000071252	protein_coding	gap	chr13-77334364-77612526	0
2210408I21Rik	chr13-77548022-77548522	0.000258603	0.325308	0.104	0.084	1	ENSMUST00000168779	ENSMUSG00000071252	protein_coding	gap	chr13-77334364-77612526	0
2210417A02Rik	chr5-148690723-148691223	0.00166758	-0.622731	0.015	0.023	1	ENSMUST00000150265	ENSMUSG00000086494	lincRNA	exon	chr5-148741840-148741984	50616
2210417A02Rik	chr5-148740904-148741404	0.00353717	-0.219652	0.101	0.115	1	ENSMUST00000150265	ENSMUSG00000086494	lincRNA	exon	chr5-148741840-148741984	435
2210417A02Rik	chr5-148657860-148658360	0.0926121	0.361102	0.019	0.015	1	ENSMUST00000150265	ENSMUSG00000086494	lincRNA	exon	chr5-148741840-148741984	83479
2210417A02Rik	chr5-148698259-148698759	0.242037	-0.157511	0.037	0.04	1	ENSMUST00000150265	ENSMUSG00000086494	lincRNA	exon	chr5-148741840-148741984	43080
2210417A02Rik	chr5-148741483-148741983	0.115085	0.477646	0.011	0.008	1	ENSMUST00000150265	ENSMUSG00000086494	lincRNA	exon	chr5-148741840-148741984	0
2210420H20Rik	chr18-82725654-82726154	0.154343	0.220041	0.037	0.032	1	ENSMUST00000188435	ENSMUSG00000101773	lincRNA	exon	chr18-82754505-82754568	28350
2210420H20Rik	chr18-82738123-82738623	0.0672022	0.154727	0.114	0.101	1	ENSMUST00000188435	ENSMUSG00000101773	lincRNA	exon	chr18-82754505-82754568	15881
2210420H20Rik	chr18-82763916-82764416	0.115406	0.31559	0.022	0.019	1	ENSMUST00000188435	ENSMUSG00000101773	lincRNA	exon	chr18-82758814-82759041	4874
2210420H20Rik	chr18-82765194-82765694	0.109857	0.174743	0.069	0.062	1	ENSMUST00000188435	ENSMUSG00000101773	lincRNA	exon	chr18-82758814-82759041	6152
2210420H20Rik	chr18-82767016-82767516	0.1228	0.196053	0.051	0.042	1	ENSMUST00000188435	ENSMUSG00000101773	lincRNA	exon	chr18-82758814-82759041	7974
2210420H20Rik	chr18-82798496-82798996	0.0210857	0.391306	0.03	0.022	1	ENSMUST00000188435	ENSMUSG00000101773	lincRNA	exon	chr18-82758814-82759041	39454
2300002M23Rik	chr17-35569153-35569653	0.0370555	0.383372	0.025	0.02	1	ENSMUST00000044326	ENSMUSG00000039269	protein_coding	utr	chr17-35568817-35568952	200
2310001H17Rik	chr6-129229839-129230339	0.0595366	0.426966	0.018	0.013	1	ENSMUST00000181517	ENSMUSG00000097354	lincRNA	gap	chr6-129216537-129233063	0
2310001H17Rik	chr6-129237832-129238332	0.135085	0.236688	0.032	0.028	1	ENSMUST00000181238	ENSMUSG00000097354	lincRNA	exon	chr6-129237739-129237948	0
2310002F09Rik	chr7-43747764-43748264	0.364225	-0.250365	0.008	0.01	1	ENSMUST00000181551	ENSMUSG00000097178	lincRNA	gap	chr7-43747791-43748650	0
2310003H01Rik	chr11-120373755-120374255	0.517247	0.101098	0.036	0.033	1	ENSMUST00000026448	ENSMUSG00000025384	protein_coding	cds	chr11-120373882-120374651	0
2310003H01Rik	chr11-120378082-120378582	0.210315	-0.184608	0.03	0.032	1	ENSMUST00000026448	ENSMUSG00000025384	protein_coding	cds	chr11-120378542-120378706	0
2310005A03Rik	chr2-155099371-155099871	0.1941	0.424756	0.01	0.007	1	ENSMUST00000142569	ENSMUSG00000087254	lincRNA	gap	chr2-155099236-155100027	0
2310005E17Rik	chr13-98396617-98397117	0.00421976	-0.55012	0.016	0.023	1	ENSMUST00000186644	ENSMUSG00000099446	lincRNA	exon	chr13-98424109-98424916	26991
2310008N11Rik	chr8-26747130-26747630	0.108829	0.294718	0.026	0.022	1	ENSMUST00000189978	ENSMUSG00000100335	lincRNA	exon	chr8-26814593-26814807	66962
2310008N11Rik	chr8-26677419-26677919	0.0015977	0.336215	0.074	0.057	1	ENSMUST00000189978	ENSMUSG00000100335	lincRNA	exon	chr8-26814593-26814807	136673
2310008N11Rik	chr8-26681041-26681541	0.0934447	0.341195	0.02	0.016	1	ENSMUST00000189978	ENSMUSG00000100335	lincRNA	exon	chr8-26814593-26814807	133051
2310008N11Rik	chr8-26748547-26749047	0.0068937	-0.185761	0.12	0.134	1	ENSMUST00000189978	ENSMUSG00000100335	lincRNA	exon	chr8-26814593-26814807	65545
2310008N11Rik	chr8-26780514-26781014	0.0392676	0.62235	0.01	0.007	1	ENSMUST00000189978	ENSMUSG00000100335	lincRNA	exon	chr8-26814593-26814807	33578
2310008N11Rik	chr8-26794378-26794878	0.222818	0.240633	0.022	0.019	1	ENSMUST00000189978	ENSMUSG00000100335	lincRNA	exon	chr8-26814593-26814807	19714
2310008N11Rik	chr8-26805051-26805551	0.00267591	0.326788	0.071	0.057	1	ENSMUST00000189978	ENSMUSG00000100335	lincRNA	exon	chr8-26814593-26814807	9041
2310008N11Rik	chr8-26805688-26806188	0.0434316	-0.332636	0.024	0.029	1	ENSMUST00000189978	ENSMUSG00000100335	lincRNA	exon	chr8-26814593-26814807	8404
2310008N11Rik	chr8-26811491-26811991	0.0224132	0.223857	0.087	0.076	1	ENSMUST00000189978	ENSMUSG00000100335	lincRNA	exon	chr8-26814593-26814807	2601
2310008N11Rik	chr8-26831117-26831617	0.0137005	0.631223	0.014	0.009	1	ENSMUST00000189978	ENSMUSG00000100335	lincRNA	exon	chr8-26824214-26824423	6693
2310008N11Rik	chr8-26891774-26892274	0.0399023	0.478879	0.016	0.012	1	ENSMUST00000189978	ENSMUSG00000100335	lincRNA	exon	chr8-26824214-26824423	67350
2310010G23Rik	chrX-36811303-36811803	0.442779	-0.1848	0.01	0.012	1	ENSMUST00000180483	ENSMUSG00000097468	lincRNA	exon	chrX-36814771-36815330	2967
2310010J17Rik	chr7-90060934-90061434	0.240111	0.346397	0.011	0.008	1	ENSMUST00000181189	ENSMUSG00000097162	lincRNA	exon	chr7-90124858-90125032	63423
2310010J17Rik	chr7-90060196-90060696	0.411294	-0.116436	0.029	0.032	1	ENSMUST00000181189	ENSMUSG00000097162	lincRNA	exon	chr7-90124858-90125032	64161
2310010J17Rik	chr7-90074480-90074980	0.00828431	-0.108463	0.277	0.294	1	ENSMUST00000181189	ENSMUSG00000097162	lincRNA	exon	chr7-90124858-90125032	49877
2310010J17Rik	chr7-90090934-90091434	0.112458	-0.19769	0.037	0.043	1	ENSMUST00000181189	ENSMUSG00000097162	lincRNA	exon	chr7-90124858-90125032	33423
2310010J17Rik	chr7-90095762-90096262	0.166499	0.127748	0.093	0.085	1	ENSMUST00000181189	ENSMUSG00000097162	lincRNA	exon	chr7-90124858-90125032	28595
2310010J17Rik	chr7-90099263-90099763	0.356135	-0.150723	0.022	0.023	1	ENSMUST00000181189	ENSMUSG00000097162	lincRNA	exon	chr7-90124858-90125032	25094
2310014F06Rik	chr7-112603695-112604195	0.244136	-0.327194	0.008	0.01	1	ENSMUST00000146145	ENSMUSG00000085945	processed_transcript	exon	chr7-112613468-112613767	9272
2310014F06Rik	chr7-112659744-112660244	0.600044	-0.131452	0.01	0.01	1	ENSMUST00000146145	ENSMUSG00000085945	processed_transcript	gap	chr7-112618668-112677848	0
2310015A10Rik	chr12-80123376-80123876	0.14068	-0.357086	0.01	0.013	1	ENSMUST00000180643	ENSMUSG00000097729	lincRNA	exon	chr12-80120548-80125126	0
2310015A10Rik	chr12-80129508-80130008	0.671004	0.117156	0.013	0.012	1	ENSMUST00000180643	ENSMUSG00000097729	lincRNA	gap	chr12-80125127-80131813	0
2310015A10Rik	chr12-80131256-80131756	0.118377	0.267627	0.032	0.026	1	ENSMUST00000180643	ENSMUSG00000097729	lincRNA	gap	chr12-80125127-80131813	0
2310015A10Rik	chr12-80131896-80132396	0.165362	0.146794	0.081	0.073	1	ENSMUST00000180643	ENSMUSG00000097729	lincRNA	gap	chr12-80131960-80132726	0
2310015A10Rik	chr12-80133123-80133623	0.210987	0.223069	0.028	0.023	1	ENSMUST00000180643	ENSMUSG00000097729	lincRNA	exon	chr12-80132727-80132844	278
2310015A10Rik	chr12-80136431-80136931	0.0970379	0.41629	0.014	0.011	1	ENSMUST00000180643	ENSMUSG00000097729	lincRNA	exon	chr12-80132727-80132844	3586
2310015A10Rik	chr12-80146398-80146898	0.242327	0.155249	0.049	0.044	1	ENSMUST00000180643	ENSMUSG00000097729	lincRNA	exon	chr12-80132727-80132844	13553
2310015B20Rik	chr10-70225782-70226282	0.672324	-0.100119	0.011	0.011	1	ENSMUST00000020090	ENSMUSG00000019933	processed_transcript	exon	chr10-70219477-70219711	6070
2310015D24Rik	chr16-13467117-13467617	0.273792	-0.169602	0.026	0.029	1	ENSMUST00000187920	ENSMUSG00000099411	lincRNA	exon	chr16-13514131-13516487	46513
2310015D24Rik	chr16-13494072-13494572	0.0878438	0.28882	0.031	0.026	1	ENSMUST00000187920	ENSMUSG00000099411	lincRNA	exon	chr16-13514131-13516487	19558
2310015D24Rik	chr16-13511123-13511623	0.506104	0.146445	0.017	0.016	1	ENSMUST00000187920	ENSMUSG00000099411	lincRNA	exon	chr16-13514131-13516487	2507
2310015K22Rik	chr1-80224753-80225253	0.140537	0.389768	0.013	0.01	1	ENSMUST00000191452	ENSMUSG00000101257	lincRNA	gap	chr1-80225172-80227459	0
2310015K22Rik	chr1-80237322-80237822	0.0320112	-0.168094	0.1	0.109	1	ENSMUST00000191452	ENSMUSG00000101257	lincRNA	exon	chr1-80227460-80228792	8529
2310016D23Rik	chr1-60793657-60794157	0.000974065	-0.561098	0.022	0.028	1	ENSMUST00000130082	ENSMUSG00000085965	lincRNA	gap	chr1-60778917-60797943	0
2310020H05Rik	chr13-99092281-99092781	0.386861	0.224487	0.013	0.01	1	ENSMUST00000189489	ENSMUSG00000100410	lincRNA	exon	chr13-99087854-99087921	4359
2310022A10Rik	chr7-27576857-27577357	0.321887	0.159019	0.032	0.028	1	ENSMUST00000190656	ENSMUSG00000049643	protein_coding	gap	chr7-27574741-27578712	0
2310022A10Rik	chr7-27580536-27581036	0.201728	-0.27131	0.015	0.017	1	ENSMUST00000187960	ENSMUSG00000049643	protein_coding	cds	chr7-27580337-27580691	0
2310022B05Rik	chr8-124659538-124660038	0.0558086	0.295095	0.037	0.03	1	ENSMUST00000034464	ENSMUSG00000031983	protein_coding	gap	chr8-124651422-124662847	0
2310022B05Rik	chr8-124660388-124660888	0.294506	0.1787	0.034	0.028	1	ENSMUST00000034464	ENSMUSG00000031983	protein_coding	gap	chr8-124651422-124662847	0
2310022B05Rik	chr8-124660943-124661443	0.000711846	0.546997	0.036	0.026	1	ENSMUST00000034464	ENSMUSG00000031983	protein_coding	gap	chr8-124651422-124662847	0
2310022B05Rik	chr8-124634657-124635157	0.456068	-0.115971	0.025	0.026	1	ENSMUST00000034464	ENSMUSG00000031983	protein_coding	utr	chr8-124635766-124637907	608
2310022B05Rik	chr8-124635666-124636166	0.474119	-0.134846	0.019	0.018	1	ENSMUST00000034464	ENSMUSG00000031983	protein_coding	utr	chr8-124635766-124637907	0
2310022B05Rik	chr8-124643228-124643728	0.0558418	-0.525421	0.009	0.011	1	ENSMUST00000034464	ENSMUSG00000031983	protein_coding	gap	chr8-124639616-124651370	0
2310022B05Rik	chr8-124632860-124633360	0.0296191	0.530441	0.016	0.011	1	ENSMUST00000034464	ENSMUSG00000031983	protein_coding	utr	chr8-124635766-124637907	2405
2310022B05Rik	chr8-124643777-124644277	0.145261	0.142479	0.087	0.078	1	ENSMUST00000034464	ENSMUSG00000031983	protein_coding	gap	chr8-124639616-124651370	0
2310022B05Rik	chr8-124657843-124658343	0.00137586	0.672175	0.022	0.014	1	ENSMUST00000034464	ENSMUSG00000031983	protein_coding	gap	chr8-124651422-124662847	0
2310022B05Rik	chr8-124658380-124658880	0.162288	0.247386	0.029	0.024	1	ENSMUST00000034464	ENSMUSG00000031983	protein_coding	gap	chr8-124651422-124662847	0
2310022B05Rik	chr8-124648256-124648756	0.405416	0.160963	0.022	0.021	1	ENSMUST00000034464	ENSMUSG00000031983	protein_coding	gap	chr8-124639616-124651370	0
2310022B05Rik	chr8-124652490-124652990	0.0159536	0.518022	0.02	0.014	1	ENSMUST00000034464	ENSMUSG00000031983	protein_coding	gap	chr8-124651422-124662847	0
2310022B05Rik	chr8-124653822-124654322	0.234065	-0.124732	0.054	0.058	1	ENSMUST00000034464	ENSMUSG00000031983	protein_coding	gap	chr8-124651422-124662847	0
2310022B05Rik	chr8-124630922-124631422	0.118041	0.373998	0.016	0.012	1	ENSMUST00000034464	ENSMUSG00000031983	protein_coding	utr	chr8-124635766-124637907	4343
2310026I22Rik	chr18-32894217-32894717	0.239905	0.213898	0.024	0.021	1	ENSMUST00000180941	ENSMUSG00000097710	lincRNA	exon	chr18-32915826-32916730	21108
2310026I22Rik	chr18-32928236-32928736	0.0731259	0.207567	0.06	0.053	1	ENSMUST00000180941	ENSMUSG00000097710	lincRNA	gap	chr18-32923954-32938910	0
2310031A07Rik	chr11-46449678-46450178	0.0987343	-0.179723	0.053	0.061	1	ENSMUST00000181212	ENSMUSG00000097457	lincRNA	exon	chr11-46447069-46447248	2429
2310034O05Rik	chr5-100199036-100199536	0.457647	0.101315	0.047	0.045	1	ENSMUST00000185221	ENSMUSG00000100157	lincRNA	exon	chr5-100210692-100211027	11155
2310034O05Rik	chr5-100226782-100227282	0.124738	-0.417177	0.008	0.011	1	ENSMUST00000185221	ENSMUSG00000100157	lincRNA	exon	chr5-100217447-100218049	8732
2310034O05Rik	chr5-100240579-100241079	0.220564	0.24075	0.025	0.019	1	ENSMUST00000185221	ENSMUSG00000100157	lincRNA	exon	chr5-100217447-100218049	22529
2310035C23Rik	chr1-105664385-105664885	0.376255	0.20477	0.016	0.015	1	ENSMUST00000190501	ENSMUSG00000026319	protein_coding	cds	chr1-105664108-105664633	0
2310035C23Rik	chr1-105680544-105681044	0.443832	0.201227	0.013	0.011	1	ENSMUST00000191293	ENSMUSG00000026319	protein_coding	gap	chr1-105678253-105686948	0
2310039H08Rik	chr17-46773111-46773611	0.408438	0.130153	0.039	0.034	1	ENSMUST00000071430	ENSMUSG00000062619	protein_coding	cds	chr17-46772813-46773157	0
2310039L15Rik	chr10-95336784-95337284	0.211047	0.200456	0.033	0.03	1	ENSMUST00000185313	ENSMUSG00000100550	lincRNA	gap	chr10-95336556-95358266	0
2310040G24Rik	chr6-86485715-86486215	0.520849	-0.125207	0.015	0.017	1	ENSMUST00000189386	ENSMUSG00000101655	lincRNA	gap	chr6-86483718-86487794	0
2310040G24Rik	chr6-86487820-86488320	0.127511	0.22119	0.043	0.036	1	ENSMUST00000188135	ENSMUSG00000101655	lincRNA	gap	chr6-86483700-86488001	0
2310043O21Rik	chr15-38538337-38538837	0.115658	-0.131908	0.08	0.089	1	ENSMUST00000185323	ENSMUSG00000102106	lincRNA	exon	chr15-38549344-38549550	10506
2310043O21Rik	chr15-38538869-38539369	0.392379	0.204817	0.016	0.014	1	ENSMUST00000185323	ENSMUSG00000102106	lincRNA	exon	chr15-38549344-38549550	9974
2310043O21Rik	chr15-38542695-38543195	0.257879	0.211137	0.025	0.022	1	ENSMUST00000185323	ENSMUSG00000102106	lincRNA	exon	chr15-38549344-38549550	6148
2310043O21Rik	chr15-38560335-38560835	0.456564	-0.159462	0.014	0.014	1	ENSMUST00000185323	ENSMUSG00000102106	lincRNA	gap	chr15-38549551-38587027	0
2310043O21Rik	chr15-38584993-38585493	0.351833	0.153614	0.034	0.03	1	ENSMUST00000185323	ENSMUSG00000102106	lincRNA	gap	chr15-38549551-38587027	0
2310043O21Rik	chr15-38585619-38586119	0.0024499	-0.105423	0.349	0.367	1	ENSMUST00000185323	ENSMUSG00000102106	lincRNA	gap	chr15-38549551-38587027	0
2310043O21Rik	chr15-38586692-38587192	0.411215	-0.120346	0.029	0.032	1	ENSMUST00000185323	ENSMUSG00000102106	lincRNA	gap	chr15-38549551-38587027	0
2310043O21Rik	chr15-38602668-38603168	0.0550627	0.334249	0.029	0.024	1	ENSMUST00000185323	ENSMUSG00000102106	lincRNA	exon	chr15-38594808-38594934	7733
2310043O21Rik	chr15-38607307-38607807	0.0337858	0.338303	0.033	0.025	1	ENSMUST00000185323	ENSMUSG00000102106	lincRNA	exon	chr15-38594808-38594934	12372
2310043O21Rik	chr15-38627214-38627714	0.347566	-0.225445	0.011	0.012	1	ENSMUST00000185323	ENSMUSG00000102106	lincRNA	exon	chr15-38594808-38594934	32279
2310045N01Rik	chr8-70139674-70140174	0.0684241	0.228311	0.057	0.046	1	ENSMUST00000129668	ENSMUSG00000002345	protein_coding	cds	chr8-70139736-70139772	0
2310047M10Rik	chr11-69058732-69059232	0.302183	0.171086	0.034	0.03	1	ENSMUST00000051888	ENSMUSG00000045176	protein_coding	exon	chr11-69059717-69061578	484
2310047M10Rik	chr11-69060823-69061323	0.546447	0.126256	0.024	0.021	1	ENSMUST00000051888	ENSMUSG00000045176	protein_coding	cds	chr11-69059798-69060880	0
2310047M10Rik	chr11-69061457-69061957	0.0684926	0.434518	0.017	0.011	1	ENSMUST00000051888	ENSMUSG00000045176	protein_coding	utr	chr11-69060881-69061578	0
2310047M10Rik	chr11-69062132-69062632	0.0153584	0.188009	0.135	0.119	1	ENSMUST00000051888	ENSMUSG00000045176	protein_coding	utr	chr11-69060881-69061578	553
2310047M10Rik	chr11-69064312-69064812	0.13004	0.410639	0.013	0.01	1	ENSMUST00000051888	ENSMUSG00000045176	protein_coding	utr	chr11-69060881-69061578	2733
2310050C09Rik	chr3-92894017-92894517	0.444994	-0.12598	0.023	0.023	1	ENSMUST00000163439	ENSMUSG00000090314	protein_coding	exon	chr3-92870176-92870216	23800
2310058D17Rik	chr11-58977088-58977588	0.477033	0.20079	0.011	0.01	1	ENSMUST00000131221	ENSMUSG00000085379	processed_transcript	gap	chr11-58968580-58977681	0
2310065F04Rik	chr11-67111945-67112445	0.43766	-0.169686	0.012	0.013	1	ENSMUST00000125538	ENSMUSG00000087410	lincRNA	exon	chr11-67112461-67114117	15
2310067B10Rik	chr11-115768885-115769385	0.0986923	0.298311	0.026	0.021	1	ENSMUST00000141871	ENSMUSG00000020747	protein_coding	gap	chr11-115765493-115777298	0
2310067B10Rik	chr11-115769488-115769988	0.174409	0.324495	0.015	0.012	1	ENSMUST00000141871	ENSMUSG00000020747	protein_coding	gap	chr11-115765493-115777298	0
2310067B10Rik	chr11-115779132-115779632	0.00422598	0.119776	0.341	0.315	1	ENSMUST00000141871	ENSMUSG00000020747	protein_coding	gap	chr11-115777378-115785439	0
2310067B10Rik	chr11-115780454-115780954	0.190971	0.129338	0.087	0.079	1	ENSMUST00000141871	ENSMUSG00000020747	protein_coding	gap	chr11-115777378-115785439	0
2310067B10Rik	chr11-115792317-115792817	0.0357198	-0.240199	0.046	0.055	1	ENSMUST00000103033	ENSMUSG00000020747	protein_coding	cds	chr11-115792317-115792490	0
2310067B10Rik	chr11-115797076-115797576	0.360036	-0.236269	0.01	0.011	1	ENSMUST00000103033	ENSMUSG00000020747	protein_coding	cds	chr11-115797563-115797656	0
2310067B10Rik	chr11-115797864-115798364	0.170448	0.301349	0.02	0.015	1	ENSMUST00000103033	ENSMUSG00000020747	protein_coding	cds	chr11-115798275-115798347	0
2310069B03Rik	chr6-82844347-82844847	0.665405	0.103174	0.015	0.014	1	ENSMUST00000186147	ENSMUSG00000100291	lincRNA	exon	chr6-82877864-82879476	33016
2310069G16Rik	chr15-44823804-44824304	0.227613	0.213614	0.025	0.022	1	ENSMUST00000181839	ENSMUSG00000097102	lincRNA	exon	chr15-44805235-44805827	17976
2310069G16Rik	chr15-44832758-44833258	0.418632	0.147252	0.027	0.024	1	ENSMUST00000181839	ENSMUSG00000097102	lincRNA	exon	chr15-44805235-44805827	26930
2310069G16Rik	chr15-44836202-44836702	0.315541	0.17649	0.026	0.025	1	ENSMUST00000181839	ENSMUSG00000097102	lincRNA	exon	chr15-44805235-44805827	30374
2310081O03Rik	chr4-56127955-56128455	0.272189	-0.109449	0.061	0.065	1	ENSMUST00000128591	ENSMUSG00000085020	lincRNA	exon	chr4-56220617-56220816	92161
2310081O03Rik	chr4-56139730-56140230	0.0378808	0.662621	0.01	0.006	1	ENSMUST00000128591	ENSMUSG00000085020	lincRNA	exon	chr4-56220617-56220816	80386
2310081O03Rik	chr4-56143218-56143718	0.13442	0.361602	0.014	0.012	1	ENSMUST00000128591	ENSMUSG00000085020	lincRNA	exon	chr4-56220617-56220816	76898
2310081O03Rik	chr4-56160865-56161365	0.636431	0.117961	0.015	0.014	1	ENSMUST00000128591	ENSMUSG00000085020	lincRNA	exon	chr4-56220617-56220816	59251
2310081O03Rik	chr4-56178847-56179347	0.572509	0.120074	0.02	0.017	1	ENSMUST00000128591	ENSMUSG00000085020	lincRNA	exon	chr4-56220617-56220816	41269
2310081O03Rik	chr4-56362061-56362561	0.0451059	0.542261	0.012	0.008	1	ENSMUST00000128591	ENSMUSG00000085020	lincRNA	exon	chr4-56223963-56224521	137539
2310081O03Rik	chr4-56411190-56411690	0.0198499	-0.119595	0.19	0.199	1	ENSMUST00000128591	ENSMUSG00000085020	lincRNA	exon	chr4-56223963-56224521	186668
2410002F23Rik	chr7-44247125-44247625	0.0831232	0.35016	0.022	0.019	1	ENSMUST00000188111	ENSMUSG00000045411	protein_coding	utr	chr7-44247238-44247416	0
2410003L11Rik	chr11-97589213-97589713	0.563922	0.169516	0.011	0.009	1	ENSMUST00000131687	ENSMUSG00000085860	processed_transcript	exon	chr11-97598511-97598667	8797
2410003L11Rik	chr11-97609809-97610309	0.00333459	0.972583	0.01	0.005	1	ENSMUST00000131687	ENSMUSG00000085860	processed_transcript	gap	chr11-97598668-97614923	0
2410003L11Rik	chr11-97622401-97622901	0.0362988	0.224045	0.069	0.061	1	ENSMUST00000131687	ENSMUSG00000085860	processed_transcript	gap	chr11-97618500-97622606	0
2410004B18Rik	chr3-145941911-145942411	0.017774	0.400556	0.029	0.022	1	ENSMUST00000190472	ENSMUSG00000036873	protein_coding	gap	chr3-145939097-145943761	0
2410004B18Rik	chr3-145949977-145950477	0.126211	0.185158	0.056	0.048	1	ENSMUST00000039571	ENSMUSG00000036873	protein_coding	utr	chr3-145943871-145944829	5147
2410004N09Rik	chr18-33692045-33692545	0.0199897	-0.173488	0.102	0.113	1	ENSMUST00000146010	ENSMUSG00000087590	lincRNA	exon	chr18-33794892-33795124	102346
2410004P03Rik	chr12-17018430-17018930	0.144688	-0.246912	0.021	0.024	1	ENSMUST00000095823	ENSMUSG00000071398	protein_coding	exon	chr12-17011452-17011727	6702
2410004P03Rik	chr12-17011410-17011910	0.156574	-0.122554	0.073	0.079	1	ENSMUST00000190691	ENSMUSG00000071398	protein_coding	utr	chr12-17011452-17011554	0
2410004P03Rik	chr12-17015696-17016196	0.0207507	-0.232995	0.059	0.067	1	ENSMUST00000095823	ENSMUSG00000071398	protein_coding	exon	chr12-17011452-17011727	3968
2410004P03Rik	chr12-17033455-17033955	0.155988	-0.413439	0.008	0.01	1	ENSMUST00000095823	ENSMUSG00000071398	protein_coding	exon	chr12-17011452-17011727	21727
2410006H16Rik	chr11-62603338-62603838	0.298189	0.188503	0.029	0.023	1	ENSMUST00000131787	ENSMUSG00000086841	processed_transcript	gap	chr11-62603647-62604402	0
2410015M20Rik	chr17-56609004-56609504	0.0122257	0.422179	0.033	0.025	1	ENSMUST00000052832	ENSMUSG00000049760	protein_coding	cds	chr17-56608846-56609023	0
2410080I02Rik	chr19-23132628-23133128	0.146352	-0.365943	0.01	0.013	1	ENSMUST00000142712	ENSMUSG00000044387	lincRNA	exon	chr19-23134900-23134954	1771
2410080I02Rik	chr19-23136374-23136874	0.0361085	-0.183227	0.079	0.093	1	ENSMUST00000142712	ENSMUSG00000044387	lincRNA	exon	chr19-23135359-23135717	656
2410080I02Rik	chr19-23137270-23137770	0.234698	-0.275209	0.011	0.014	1	ENSMUST00000142712	ENSMUSG00000044387	lincRNA	exon	chr19-23135359-23135717	1552
2410088K16Rik	chr1-88742318-88742818	0.472682	0.131101	0.025	0.023	1	ENSMUST00000181016	ENSMUSG00000097398	lincRNA	exon	chr1-88754890-88754958	12071
2410088K16Rik	chr1-88757027-88757527	0.182062	0.400377	0.011	0.007	1	ENSMUST00000181016	ENSMUSG00000097398	lincRNA	exon	chr1-88755534-88755736	1290
2410088K16Rik	chr1-88808465-88808965	0.30638	-0.229587	0.014	0.014	1	ENSMUST00000181016	ENSMUSG00000097398	lincRNA	exon	chr1-88755534-88755736	52728
2410089E03Rik	chr15-8169398-8169898	0.0822249	0.310269	0.028	0.023	1	ENSMUST00000110617	ENSMUSG00000039801	protein_coding	utr	chr15-8169106-8169489	0
2410127L17Rik	chr19-18661700-18662200	0.441791	-0.194376	0.009	0.011	1	ENSMUST00000025632	ENSMUSG00000024726	protein_coding	exon	chr19-18670780-18671202	8579
2410127L17Rik	chr19-18670989-18671489	0.114555	0.22096	0.046	0.038	1	ENSMUST00000025632	ENSMUSG00000024726	protein_coding	cds	chr19-18671000-18671202	0
2410127L17Rik	chr19-18671499-18671999	0.481811	0.178254	0.014	0.012	1	ENSMUST00000025632	ENSMUSG00000024726	protein_coding	gap	chr19-18671203-18677687	0
2410127L17Rik	chr19-18687518-18688018	0.183279	-0.320199	0.01	0.012	1	ENSMUST00000025632	ENSMUSG00000024726	protein_coding	gap	chr19-18679268-18690229	0
2410131K14Rik	chr5-118264207-118264707	0.00188066	-0.462055	0.026	0.035	1	ENSMUST00000049138	ENSMUSG00000032840	protein_coding	utr	chr5-118261184-118266093	0
2410131K14Rik	chr5-118297379-118297879	0.0398544	-0.311836	0.027	0.033	1	ENSMUST00000049138	ENSMUSG00000032840	protein_coding	utr	chr5-118261184-118266093	31285
2410152P15Rik	chr19-6601151-6601651	0.549324	-0.118145	0.015	0.017	1	ENSMUST00000137405	ENSMUSG00000084825	processed_transcript	exon	chr19-6617671-6618263	16019
2410152P15Rik	chr19-6615227-6615727	0.0628097	-0.520878	0.008	0.01	1	ENSMUST00000137405	ENSMUSG00000084825	processed_transcript	exon	chr19-6617671-6618263	1943
2410152P15Rik	chr19-6651170-6651670	0.512367	-0.10122	0.024	0.026	1	ENSMUST00000137405	ENSMUSG00000084825	processed_transcript	gap	chr19-6618264-6674270	0
2410152P15Rik	chr19-6663319-6663819	0.0133579	-0.197304	0.087	0.098	1	ENSMUST00000137405	ENSMUSG00000084825	processed_transcript	gap	chr19-6618264-6674270	0
2500002B13Rik	chr8-57488398-57488898	0.430652	0.154349	0.024	0.022	1	ENSMUST00000180690	ENSMUSG00000096917	lincRNA	gap	chr8-57488194-57490339	0
2500002B13Rik	chr8-57498994-57499494	0.241312	0.204965	0.029	0.027	1	ENSMUST00000180690	ENSMUSG00000096917	lincRNA	gap	chr8-57490468-57506527	0
2500002B13Rik	chr8-57498416-57498916	0.624922	0.12602	0.015	0.013	1	ENSMUST00000180690	ENSMUSG00000096917	lincRNA	gap	chr8-57490468-57506527	0
2510002D24Rik	chr16-18836327-18836827	0.0642819	-0.160083	0.076	0.082	1	ENSMUST00000191388	ENSMUSG00000071632	protein_coding	cds	chr16-18836596-18836619	0
2510003E04Rik	chr10-62549708-62550208	0.133425	-0.147842	0.059	0.066	1	ENSMUST00000159704	ENSMUSG00000036955	protein_coding	gap	chr10-62540057-62559733	0
2510009E07Rik	chr16-21655266-21655766	0.228871	0.294215	0.014	0.012	1	ENSMUST00000053336	ENSMUSG00000043391	protein_coding	gap	chr16-21653759-21694215	0
2510009E07Rik	chr16-21695139-21695639	0.604865	0.112917	0.021	0.018	1	ENSMUST00000053336	ENSMUSG00000043391	protein_coding	exon	chr16-21694216-21694665	473
2510009E07Rik	chr16-21699293-21699793	0.15526	-0.112683	0.088	0.094	1	ENSMUST00000053336	ENSMUSG00000043391	protein_coding	exon	chr16-21694216-21694665	4627
2510039O18Rik	chr4-147938639-147939139	0.492876	0.172298	0.015	0.013	1	ENSMUST00000103232	ENSMUSG00000044496	protein_coding	exon	chr4-147940895-147942057	1755
2510039O18Rik	chr4-147939293-147939793	0.176411	-0.358994	0.009	0.012	1	ENSMUST00000103232	ENSMUSG00000044496	protein_coding	exon	chr4-147940895-147942057	1101
2510039O18Rik	chr4-147939930-147940430	0.185617	-0.130175	0.061	0.064	1	ENSMUST00000103232	ENSMUSG00000044496	protein_coding	exon	chr4-147940895-147942057	464
2510039O18Rik	chr4-147941338-147941838	0.365676	0.230607	0.014	0.011	1	ENSMUST00000103232	ENSMUSG00000044496	protein_coding	cds	chr4-147941025-147942057	0
2510039O18Rik	chr4-147953473-147953973	0.0125546	0.488627	0.022	0.016	1	ENSMUST00000103232	ENSMUSG00000044496	protein_coding	utr	chr4-147946619-147947314	6158
2610002J02Rik	chr4-155238240-155238740	0.0127695	-0.398522	0.023	0.03	1	ENSMUST00000126803	ENSMUSG00000073684	protein_coding	exon	chr4-155249802-155249963	11061
2610002J02Rik	chr4-155246555-155247055	0.156627	0.356115	0.014	0.012	1	ENSMUST00000126803	ENSMUSG00000073684	protein_coding	exon	chr4-155249802-155249963	2746
2610008E11Rik	chr10-79096668-79097168	0.00153143	0.641868	0.023	0.016	1	ENSMUST00000039271	ENSMUSG00000060301	protein_coding	gap	chr10-79094558-79097457	0
2610015P09Rik	chr16-43907978-43908478	0.610664	0.137673	0.013	0.012	1	ENSMUST00000178400	ENSMUSG00000022701	protein_coding	cds	chr16-43908412-43908635	0
2610015P09Rik	chr16-43965313-43965813	0.251146	0.210887	0.027	0.022	1	ENSMUST00000178400	ENSMUSG00000022701	protein_coding	utr	chr16-43963413-43964314	998
2610015P09Rik	chr16-43965956-43966456	0.422565	0.117556	0.04	0.037	1	ENSMUST00000178400	ENSMUSG00000022701	protein_coding	utr	chr16-43963413-43964314	1641
2610020H08Rik	chr7-119849063-119849563	0.568327	0.103387	0.026	0.025	1	ENSMUST00000106520	ENSMUSG00000030924	protein_coding	utr	chr7-119848814-119848943	119
2610027K06Rik	chr11-85829952-85830452	0.275164	-0.28294	0.009	0.011	1	ENSMUST00000140673	ENSMUSG00000087013	processed_transcript	gap	chr11-85805563-85832167	0
2610028E06Rik	chr4-125850244-125850744	0.0727947	-0.381841	0.012	0.016	1	ENSMUST00000148534	ENSMUSG00000085562	lincRNA	exon	chr4-125887851-125890733	37106
2610028E06Rik	chr4-125921386-125921886	0.0672113	0.349965	0.023	0.02	1	ENSMUST00000156350	ENSMUSG00000085562	lincRNA	gap	chr4-125918807-125921872	0
2610028E06Rik	chr4-125941894-125942394	0.225758	0.260592	0.017	0.014	1	ENSMUST00000144539	ENSMUSG00000085562	lincRNA	exon	chr4-125922077-125922417	19476
2610028E06Rik	chr4-125953262-125953762	0.373791	-0.106728	0.041	0.042	1	ENSMUST00000144539	ENSMUSG00000085562	lincRNA	exon	chr4-125922077-125922417	30844
2610028E06Rik	chr4-125962643-125963143	0.00287153	-0.586831	0.015	0.021	1	ENSMUST00000144539	ENSMUSG00000085562	lincRNA	exon	chr4-125922077-125922417	40225
2610028E06Rik	chr4-125835184-125835684	0.225136	-0.203732	0.021	0.024	1	ENSMUST00000148534	ENSMUSG00000085562	lincRNA	exon	chr4-125887851-125890733	52166
2610028H24Rik	chr10-76455227-76455727	0.0651163	0.371539	0.02	0.015	1	ENSMUST00000105415	ENSMUSG00000009114	protein_coding	gap	chr10-76454820-76457500	0
2610034B18Rik	chr7-79928584-79929084	0.395625	-0.204247	0.011	0.012	1	ENSMUST00000048731	ENSMUSG00000039043	protein_coding	gap	chr7-79928379-79929572	0
2610034B18Rik	chr7-79934439-79934939	0.221773	0.20662	0.032	0.027	1	ENSMUST00000048731	ENSMUSG00000039043	protein_coding	gap	chr7-79931879-79935152	0
2610034B18Rik	chr7-79935071-79935571	0.108188	0.141228	0.109	0.095	1	ENSMUST00000048731	ENSMUSG00000039043	protein_coding	cds	chr7-79935153-79935244	0
2610034B18Rik	chr7-79962182-79962682	0.418026	0.117721	0.04	0.036	1	ENSMUST00000048731	ENSMUSG00000039043	protein_coding	exon	chr7-79935153-79935359	26822
2610034M16Rik	chr17-58765211-58765711	0.00316239	-0.693253	0.011	0.017	1	ENSMUST00000025064	ENSMUSG00000024227	protein_coding	utr	chr17-58878808-58879077	113096
2610034M16Rik	chr17-58851527-58852027	0.22623	0.322095	0.012	0.01	1	ENSMUST00000025064	ENSMUSG00000024227	protein_coding	utr	chr17-58878808-58879077	26780
2610034M16Rik	chr17-58870766-58871266	0.152818	0.387692	0.011	0.009	1	ENSMUST00000025064	ENSMUSG00000024227	protein_coding	utr	chr17-58878808-58879077	7541
2610034M16Rik	chr17-58890232-58890732	0.141403	0.22355	0.038	0.031	1	ENSMUST00000177360	ENSMUSG00000024227	protein_coding	gap	chr17-58888166-58893277	0
2610034M16Rik	chr17-58909217-58909717	0.0556492	0.298326	0.032	0.027	1	ENSMUST00000025064	ENSMUSG00000024227	protein_coding	gap	chr17-58888166-58922568	0
2610034M16Rik	chr17-58918959-58919459	0.162731	0.118077	0.108	0.098	1	ENSMUST00000025064	ENSMUSG00000024227	protein_coding	gap	chr17-58888166-58922568	0
2610034M16Rik	chr17-58959853-58960353	0.078261	-0.143708	0.085	0.092	1	ENSMUST00000025064	ENSMUSG00000024227	protein_coding	gap	chr17-58954503-58967314	0
2610035D17Rik	chr11-112978262-112978762	0.372638	0.175459	0.025	0.021	1	ENSMUST00000145206	ENSMUSG00000087259	lincRNA	exon	chr11-113043895-113045162	65132
2610035D17Rik	chr11-112979033-112979533	0.482987	0.14475	0.022	0.019	1	ENSMUST00000145206	ENSMUSG00000087259	lincRNA	exon	chr11-113043895-113045162	64361
2610035D17Rik	chr11-112989729-112990229	0.0572411	-0.312013	0.024	0.028	1	ENSMUST00000145206	ENSMUSG00000087259	lincRNA	exon	chr11-113043895-113045162	53665
2610035D17Rik	chr11-112999217-112999717	0.3185	-0.231304	0.012	0.013	1	ENSMUST00000145206	ENSMUSG00000087259	lincRNA	exon	chr11-113043895-113045162	44177
2610035D17Rik	chr11-113010896-113011396	0.0530208	-0.330529	0.021	0.027	1	ENSMUST00000145206	ENSMUSG00000087259	lincRNA	exon	chr11-113043895-113045162	32498
2610035D17Rik	chr11-113011571-113012071	0.074502	0.342166	0.023	0.019	1	ENSMUST00000145206	ENSMUSG00000087259	lincRNA	exon	chr11-113043895-113045162	31823
2610035D17Rik	chr11-113017645-113018145	0.248992	0.152102	0.051	0.048	1	ENSMUST00000145206	ENSMUSG00000087259	lincRNA	exon	chr11-113043895-113045162	25749
2610035D17Rik	chr11-113026918-113027418	0.0123304	0.265547	0.072	0.059	1	ENSMUST00000145206	ENSMUSG00000087259	lincRNA	exon	chr11-113043895-113045162	16476
2610035D17Rik	chr11-113049550-113050050	0.206855	0.398633	0.01	0.007	1	ENSMUST00000150712	ENSMUSG00000087259	lincRNA	gap	chr11-113045161-113067341	0
2610035D17Rik	chr11-113056045-113056545	0.158753	0.243774	0.029	0.025	1	ENSMUST00000150712	ENSMUSG00000087259	lincRNA	gap	chr11-113045161-113067341	0
2610035D17Rik	chr11-113057383-113057883	0.50628	0.176255	0.013	0.012	1	ENSMUST00000150712	ENSMUSG00000087259	lincRNA	gap	chr11-113045161-113067341	0
2610035D17Rik	chr11-113060190-113060690	0.359438	-0.173839	0.018	0.019	1	ENSMUST00000150712	ENSMUSG00000087259	lincRNA	gap	chr11-113045161-113067341	0
2610035D17Rik	chr11-113071917-113072417	0.454001	0.149495	0.022	0.019	1	ENSMUST00000150712	ENSMUSG00000087259	lincRNA	gap	chr11-113067387-113072767	0
2610035D17Rik	chr11-113084379-113084879	0.344615	0.160059	0.03	0.028	1	ENSMUST00000150712	ENSMUSG00000087259	lincRNA	gap	chr11-113072901-113172952	0
2610035D17Rik	chr11-113086967-113087467	0.208916	0.181163	0.04	0.036	1	ENSMUST00000150712	ENSMUSG00000087259	lincRNA	gap	chr11-113072901-113172952	0
2610035D17Rik	chr11-113101438-113101938	0.410132	-0.154354	0.019	0.018	1	ENSMUST00000150712	ENSMUSG00000087259	lincRNA	gap	chr11-113072901-113172952	0
2610035D17Rik	chr11-113114369-113114869	0.124502	0.369936	0.015	0.012	1	ENSMUST00000150712	ENSMUSG00000087259	lincRNA	gap	chr11-113072901-113172952	0
2610035D17Rik	chr11-113117108-113117608	0.0540701	0.222896	0.061	0.052	1	ENSMUST00000150712	ENSMUSG00000087259	lincRNA	gap	chr11-113072901-113172952	0
2610035D17Rik	chr11-113120526-113121026	0.000106861	0.450611	0.065	0.051	1	ENSMUST00000150712	ENSMUSG00000087259	lincRNA	gap	chr11-113072901-113172952	0
2610035D17Rik	chr11-113125719-113126219	0.0260267	0.316269	0.043	0.034	1	ENSMUST00000150712	ENSMUSG00000087259	lincRNA	gap	chr11-113072901-113172952	0
2610035D17Rik	chr11-113126239-113126739	0.0932522	0.324174	0.024	0.019	1	ENSMUST00000150712	ENSMUSG00000087259	lincRNA	gap	chr11-113072901-113172952	0
2610035D17Rik	chr11-113128215-113128715	0.0630973	0.216994	0.059	0.052	1	ENSMUST00000150712	ENSMUSG00000087259	lincRNA	gap	chr11-113072901-113172952	0
2610035D17Rik	chr11-113129197-113129697	0.36204	0.148903	0.033	0.029	1	ENSMUST00000150712	ENSMUSG00000087259	lincRNA	gap	chr11-113072901-113172952	0
2610035D17Rik	chr11-113135240-113135740	0.0208007	0.361293	0.034	0.028	1	ENSMUST00000150712	ENSMUSG00000087259	lincRNA	gap	chr11-113072901-113172952	0
2610035D17Rik	chr11-113140505-113141005	0.0488041	0.191933	0.086	0.074	1	ENSMUST00000150712	ENSMUSG00000087259	lincRNA	gap	chr11-113072901-113172952	0
2610035D17Rik	chr11-113142821-113143321	0.170384	0.213712	0.035	0.031	1	ENSMUST00000150712	ENSMUSG00000087259	lincRNA	gap	chr11-113072901-113172952	0
2610035D17Rik	chr11-113144279-113144779	0.148679	0.161774	0.072	0.063	1	ENSMUST00000150712	ENSMUSG00000087259	lincRNA	gap	chr11-113072901-113172952	0
2610035D17Rik	chr11-113146703-113147203	0.125099	0.380087	0.015	0.012	1	ENSMUST00000150712	ENSMUSG00000087259	lincRNA	gap	chr11-113072901-113172952	0
2610035D17Rik	chr11-113147911-113148411	0.189058	0.156295	0.062	0.055	1	ENSMUST00000150712	ENSMUSG00000087259	lincRNA	gap	chr11-113072901-113172952	0
2610035D17Rik	chr11-113158777-113159277	0.0772849	0.327435	0.025	0.02	1	ENSMUST00000150712	ENSMUSG00000087259	lincRNA	gap	chr11-113072901-113172952	0
2610035D17Rik	chr11-113163758-113164258	0.441289	-0.145976	0.017	0.019	1	ENSMUST00000150712	ENSMUSG00000087259	lincRNA	gap	chr11-113072901-113172952	0
2610035D17Rik	chr11-113166532-113167032	0.38069	0.121445	0.045	0.042	1	ENSMUST00000150712	ENSMUSG00000087259	lincRNA	gap	chr11-113072901-113172952	0
2610035D17Rik	chr11-113175244-113175744	0.0801977	0.372822	0.019	0.015	1	ENSMUST00000145206	ENSMUSG00000087259	lincRNA	gap	chr11-113045163-113201288	0
2610035D17Rik	chr11-113176094-113176594	0.323917	-0.142615	0.029	0.03	1	ENSMUST00000145206	ENSMUSG00000087259	lincRNA	gap	chr11-113045163-113201288	0
2610035D17Rik	chr11-113184060-113184560	0.00356798	-0.304941	0.055	0.068	1	ENSMUST00000145206	ENSMUSG00000087259	lincRNA	gap	chr11-113045163-113201288	0
2610035D17Rik	chr11-113201627-113202127	0.0139947	-0.106395	0.25	0.258	1	ENSMUST00000145206	ENSMUSG00000087259	lincRNA	exon	chr11-113201289-113201822	0
2610035F20Rik	chr14-122473270-122473770	0.0137737	0.713153	0.012	0.007	1	ENSMUST00000177306	ENSMUSG00000085555	processed_transcript	gap	chr14-122473178-122474447	0
2610037D02Rik	chr15-96283808-96284308	0.214071	-0.234273	0.017	0.019	1	ENSMUST00000185067	ENSMUSG00000097536	lincRNA	exon	chr15-96281499-96284495	0
2610037D02Rik	chr15-96284619-96285119	0.21672	0.151043	0.061	0.053	1	ENSMUST00000185067	ENSMUSG00000097536	lincRNA	exon	chr15-96281499-96284495	123
2610044O15Rik8	chr8-129234400-129234900	0.0532906	0.120738	0.205	0.19	1	ENSMUST00000189965	ENSMUSG00000071302	protein_coding	utr	chr8-129234312-129234406	0
2610044O15Rik8	chr8-129263340-129263840	0.187851	0.101217	0.141	0.131	1	ENSMUST00000189965	ENSMUSG00000071302	protein_coding	exon	chr8-129234309-129234406	28933
2610203C20Rik	chr9-41413025-41413525	0.264921	-0.222997	0.016	0.017	1	ENSMUST00000190109	ENSMUSG00000074415	processed_transcript	gap	chr9-41402264-41431753	0
2610203C20Rik	chr9-41439928-41440428	0.157661	-0.195792	0.031	0.035	1	ENSMUST00000188945	ENSMUSG00000074415	processed_transcript	gap	chr9-41402264-41528122	0
2610203C20Rik	chr9-41464885-41465385	0.111195	-0.362474	0.013	0.016	1	ENSMUST00000188945	ENSMUSG00000074415	processed_transcript	gap	chr9-41402264-41528122	0
2610203C20Rik	chr9-41473867-41474367	0.071064	0.320744	0.029	0.024	1	ENSMUST00000188945	ENSMUSG00000074415	processed_transcript	gap	chr9-41402264-41528122	0
2610203C20Rik	chr9-41478154-41478654	0.0350955	0.477217	0.019	0.013	1	ENSMUST00000188945	ENSMUSG00000074415	processed_transcript	gap	chr9-41402264-41528122	0
2610203C20Rik	chr9-41513614-41514114	0.330386	-0.266376	0.008	0.01	1	ENSMUST00000188945	ENSMUSG00000074415	processed_transcript	gap	chr9-41402264-41528122	0
2610203C20Rik	chr9-41524487-41524987	0.187129	0.165554	0.056	0.047	1	ENSMUST00000188945	ENSMUSG00000074415	processed_transcript	gap	chr9-41402264-41528122	0
2610203C20Rik	chr9-41531493-41531993	0.477809	0.194253	0.012	0.012	1	ENSMUST00000188945	ENSMUSG00000074415	processed_transcript	gap	chr9-41528201-41589973	0
2610203C20Rik	chr9-41545757-41546257	0.472695	0.192775	0.012	0.011	1	ENSMUST00000188945	ENSMUSG00000074415	processed_transcript	gap	chr9-41528201-41589973	0
2610203C20Rik	chr9-41581528-41582028	0.177185	0.241916	0.029	0.023	1	ENSMUST00000188945	ENSMUSG00000074415	processed_transcript	gap	chr9-41528201-41589973	0
2610203C20Rik	chr9-41583375-41583875	0.0650735	0.232983	0.055	0.047	1	ENSMUST00000188945	ENSMUSG00000074415	processed_transcript	gap	chr9-41528201-41589973	0
2610203C20Rik	chr9-41583995-41584495	0.00251564	-0.218125	0.114	0.129	1	ENSMUST00000188945	ENSMUSG00000074415	processed_transcript	gap	chr9-41528201-41589973	0
2610203C20Rik	chr9-41589017-41589517	0.0366214	0.48955	0.017	0.012	1	ENSMUST00000188945	ENSMUSG00000074415	processed_transcript	gap	chr9-41528201-41589973	0
2610203C20Rik	chr9-41594643-41595143	0.625185	-0.107932	0.013	0.014	1	ENSMUST00000181814	ENSMUSG00000074415	processed_transcript	gap	chr9-41528201-41612559	0
2610203C20Rik	chr9-41595691-41596191	0.567842	0.1476	0.013	0.013	1	ENSMUST00000181814	ENSMUSG00000074415	processed_transcript	gap	chr9-41528201-41612559	0
2610203C20Rik	chr9-41599792-41600292	0.196113	0.252538	0.024	0.019	1	ENSMUST00000181814	ENSMUSG00000074415	processed_transcript	gap	chr9-41528201-41612559	0
2610203C20Rik	chr9-41600796-41601296	0.0105114	-0.133565	0.188	0.204	1	ENSMUST00000188412	ENSMUSG00000074415	processed_transcript	gap	chr9-41600455-41612559	0
2610203C20Rik	chr9-41604827-41605327	0.4527	-0.131891	0.02	0.022	1	ENSMUST00000188412	ENSMUSG00000074415	processed_transcript	gap	chr9-41600455-41612559	0
2610203C20Rik	chr9-41605424-41605924	0.435757	-0.211172	0.01	0.009	1	ENSMUST00000188412	ENSMUSG00000074415	processed_transcript	gap	chr9-41600455-41612559	0
2610203C20Rik	chr9-41611375-41611875	0.359698	0.181814	0.023	0.019	1	ENSMUST00000188412	ENSMUSG00000074415	processed_transcript	gap	chr9-41600455-41612559	0
2610203C20Rik	chr9-41612046-41612546	1.20171e-05	0.391624	0.102	0.078	1	ENSMUST00000188412	ENSMUSG00000074415	processed_transcript	gap	chr9-41600455-41612559	0
2610203C20Rik	chr9-41636935-41637435	0.00497071	0.417537	0.04	0.031	1	ENSMUST00000180535	ENSMUSG00000074415	processed_transcript	exon	chr9-41614237-41617772	19162
2610203C20Rik	chr9-41765802-41766302	0.0945451	0.442467	0.014	0.01	1	ENSMUST00000180535	ENSMUSG00000074415	processed_transcript	exon	chr9-41614237-41617772	148029
2610203C20Rik	chr9-41377866-41378366	0.0681336	0.239155	0.052	0.044	1	ENSMUST00000190109	ENSMUSG00000074415	processed_transcript	gap	chr9-41376677-41393193	0
2610203C20Rik	chr9-41377062-41377562	0.255473	-0.137848	0.045	0.047	1	ENSMUST00000190109	ENSMUSG00000074415	processed_transcript	gap	chr9-41376677-41393193	0
2610203C20Rik	chr9-41585731-41586231	0.00278406	0.652501	0.021	0.013	1	ENSMUST00000188945	ENSMUSG00000074415	processed_transcript	gap	chr9-41528201-41589973	0
2610203C20Rik	chr9-41586238-41586738	0.0212657	0.431276	0.026	0.019	1	ENSMUST00000188945	ENSMUSG00000074415	processed_transcript	gap	chr9-41528201-41589973	0
2610203C20Rik	chr9-41587127-41587627	0.710954	0.102812	0.013	0.012	1	ENSMUST00000188945	ENSMUSG00000074415	processed_transcript	gap	chr9-41528201-41589973	0
2610203C20Rik	chr9-41303019-41303519	0.155993	0.179227	0.055	0.047	1	ENSMUST00000188945	ENSMUSG00000074415	processed_transcript	exon	chr9-41376397-41376676	72877
2610203C20Rik	chr9-41319051-41319551	0.222017	-0.206317	0.023	0.024	1	ENSMUST00000188945	ENSMUSG00000074415	processed_transcript	exon	chr9-41376397-41376676	56845
2610203C20Rik	chr9-41325700-41326200	0.00531739	0.8304	0.011	0.007	1	ENSMUST00000188945	ENSMUSG00000074415	processed_transcript	exon	chr9-41376397-41376676	50196
2610203C20Rik	chr9-41328070-41328570	0.00951115	0.551536	0.02	0.015	1	ENSMUST00000188945	ENSMUSG00000074415	processed_transcript	exon	chr9-41376397-41376676	47826
2610203C20Rik	chr9-41345350-41345850	0.212526	0.234572	0.023	0.019	1	ENSMUST00000188945	ENSMUSG00000074415	processed_transcript	exon	chr9-41376397-41376676	30546
2610203C20Rik	chr9-41374407-41374907	0.00841324	0.389024	0.04	0.032	1	ENSMUST00000188945	ENSMUSG00000074415	processed_transcript	exon	chr9-41376397-41376676	1489
2610203C20Rik	chr9-41588376-41588876	0.654893	-0.105163	0.01	0.011	1	ENSMUST00000188945	ENSMUSG00000074415	processed_transcript	gap	chr9-41528201-41589973	0
2610203C20Rik	chr9-41665349-41665849	0.0728854	0.281405	0.035	0.028	1	ENSMUST00000180535	ENSMUSG00000074415	processed_transcript	exon	chr9-41614237-41617772	47576
2610203C20Rik	chr9-41686922-41687422	0.00822903	-0.303716	0.047	0.056	1	ENSMUST00000180535	ENSMUSG00000074415	processed_transcript	exon	chr9-41614237-41617772	69149
2610203C20Rik	chr9-41697021-41697521	0.0244918	0.173716	0.133	0.118	1	ENSMUST00000180535	ENSMUSG00000074415	processed_transcript	exon	chr9-41614237-41617772	79248
2610203C20Rik	chr9-41698634-41699134	0.294654	0.152026	0.041	0.037	1	ENSMUST00000180535	ENSMUSG00000074415	processed_transcript	exon	chr9-41614237-41617772	80861
2610203C20Rik	chr9-41703066-41703566	0.197706	-0.330967	0.011	0.012	1	ENSMUST00000180535	ENSMUSG00000074415	processed_transcript	exon	chr9-41614237-41617772	85293
2610203C20Rik	chr9-41736545-41737045	0.190179	0.149126	0.069	0.064	1	ENSMUST00000180535	ENSMUSG00000074415	processed_transcript	exon	chr9-41614237-41617772	118772
2610203C20Rik	chr9-41360410-41360910	0.0664561	0.412723	0.018	0.014	1	ENSMUST00000188945	ENSMUSG00000074415	processed_transcript	exon	chr9-41376397-41376676	15486
2610203C22Rik	chr1-9621351-9621851	0.117655	0.205368	0.045	0.041	1	ENSMUST00000153239	ENSMUSG00000079671	processed_transcript	gap	chr1-9621083-9631060	0
2610206C17Rik	chr7-84689072-84689572	0.108	0.256569	0.035	0.03	1	ENSMUST00000129059	ENSMUSG00000085236	processed_transcript	exon	chr7-84689640-84689814	67
2610206C17Rik	chr7-84779090-84779590	0.00070915	0.289152	0.107	0.092	1	ENSMUST00000129059	ENSMUSG00000085236	processed_transcript	exon	chr7-84775215-84776549	2540
2610206C17Rik	chr7-84805160-84805660	0.341906	0.219446	0.015	0.013	1	ENSMUST00000129059	ENSMUSG00000085236	processed_transcript	exon	chr7-84775215-84776549	28610
2610301B20Rik	chr4-10860129-10860629	0.109061	-0.401106	0.01	0.012	1	ENSMUST00000080517	ENSMUSG00000059482	protein_coding	exon	chr4-10874498-10874772	13868
2610301B20Rik	chr4-10872914-10873414	0.111437	0.387507	0.016	0.012	1	ENSMUST00000080517	ENSMUSG00000059482	protein_coding	exon	chr4-10874498-10874772	1083
2610301B20Rik	chr4-10873534-10874034	0.0190126	0.168604	0.16	0.143	1	ENSMUST00000080517	ENSMUSG00000059482	protein_coding	exon	chr4-10874498-10874772	463
2610301B20Rik	chr4-10875391-10875891	0.295179	0.280924	0.012	0.01	1	ENSMUST00000156124	ENSMUSG00000059482	protein_coding	gap	chr4-10874694-10879522	0
2610301B20Rik	chr4-10896809-10897309	0.138439	0.320166	0.017	0.014	1	ENSMUST00000156124	ENSMUSG00000059482	protein_coding	gap	chr4-10893359-10897895	0
2610306M01Rik	chr6-86822195-86822695	0.0550832	0.293141	0.035	0.03	1	ENSMUST00000185414	ENSMUSG00000100164	lincRNA	exon	chr6-86848399-86849440	25703
2610307P16Rik	chr13-28416070-28416570	0.320397	0.105252	0.077	0.071	1	ENSMUST00000134787	ENSMUSG00000085936	processed_transcript	exon	chr13-28460034-28461061	43463
2610307P16Rik	chr13-28416861-28417361	0.0777829	0.4109	0.017	0.013	1	ENSMUST00000134787	ENSMUSG00000085936	processed_transcript	exon	chr13-28460034-28461061	42672
2610307P16Rik	chr13-28417809-28418309	0.0220208	0.443518	0.026	0.018	1	ENSMUST00000134787	ENSMUSG00000085936	processed_transcript	exon	chr13-28460034-28461061	41724
2610307P16Rik	chr13-28419766-28420266	0.226785	0.205537	0.032	0.027	1	ENSMUST00000134787	ENSMUSG00000085936	processed_transcript	exon	chr13-28460034-28461061	39767
2610307P16Rik	chr13-28532252-28532752	0.151317	0.398063	0.011	0.009	1	ENSMUST00000148885	ENSMUSG00000085936	processed_transcript	gap	chr13-28461062-28561440	0
2610307P16Rik	chr13-28553142-28553642	0.0266322	-0.178097	0.102	0.107	1	ENSMUST00000148885	ENSMUSG00000085936	processed_transcript	gap	chr13-28461062-28561440	0
2610307P16Rik	chr13-28553688-28554188	0.168921	-0.142377	0.062	0.063	1	ENSMUST00000148885	ENSMUSG00000085936	processed_transcript	gap	chr13-28461062-28561440	0
2610307P16Rik	chr13-28629412-28629912	0.459989	0.201317	0.012	0.01	1	ENSMUST00000148885	ENSMUSG00000085936	processed_transcript	gap	chr13-28608629-28668369	0
2610307P16Rik	chr13-28673608-28674108	0.0262634	-0.147872	0.126	0.134	1	ENSMUST00000148885	ENSMUSG00000085936	processed_transcript	gap	chr13-28669995-28772618	0
2610307P16Rik	chr13-28690545-28691045	0.293321	0.251926	0.016	0.013	1	ENSMUST00000148885	ENSMUSG00000085936	processed_transcript	gap	chr13-28669995-28772618	0
2610307P16Rik	chr13-28720553-28721053	0.0509847	0.428608	0.019	0.013	1	ENSMUST00000148885	ENSMUSG00000085936	processed_transcript	gap	chr13-28669995-28772618	0
2610307P16Rik	chr13-28738112-28738612	0.315658	0.215507	0.019	0.017	1	ENSMUST00000148885	ENSMUSG00000085936	processed_transcript	gap	chr13-28669995-28772618	0
2610307P16Rik	chr13-28757110-28757610	0.685032	0.107177	0.015	0.012	1	ENSMUST00000148885	ENSMUSG00000085936	processed_transcript	gap	chr13-28669995-28772618	0
2610307P16Rik	chr13-28770396-28770896	0.0405667	0.538739	0.013	0.009	1	ENSMUST00000148885	ENSMUSG00000085936	processed_transcript	gap	chr13-28669995-28772618	0
2610307P16Rik	chr13-28810731-28811231	0.00269933	0.725536	0.017	0.011	1	ENSMUST00000148885	ENSMUSG00000085936	processed_transcript	gap	chr13-28772667-28883314	0
2610307P16Rik	chr13-28823326-28823826	0.654089	-0.105082	0.011	0.012	1	ENSMUST00000148885	ENSMUSG00000085936	processed_transcript	gap	chr13-28772667-28883314	0
2610307P16Rik	chr13-28885155-28885655	0.332948	0.25662	0.012	0.01	1	ENSMUST00000148885	ENSMUSG00000085936	processed_transcript	exon	chr13-28885144-28885620	0
2610316D01Rik	chr3-45375682-45376182	0.0400189	0.171713	0.109	0.098	1	ENSMUST00000191843	ENSMUSG00000097040	lincRNA	gap	chr3-45366349-45377867	0
2610316D01Rik	chr3-45376192-45376692	0.140035	0.255618	0.031	0.026	1	ENSMUST00000191843	ENSMUSG00000097040	lincRNA	gap	chr3-45366349-45377867	0
2610507B11Rik	chr11-78271934-78272434	0.305632	0.183795	0.028	0.025	1	ENSMUST00000010421	ENSMUSG00000010277	protein_coding	cds	chr11-78271291-78272383	0
2610507I01Rik	chr11-59201557-59202057	0.223907	0.245974	0.023	0.018	1	ENSMUST00000154354	ENSMUSG00000085882	processed_transcript	exon	chr11-59201493-59202385	0
2610524H06Rik	chr5-114824226-114824726	0.0206556	0.322926	0.042	0.035	1	ENSMUST00000100850	ENSMUSG00000092486	protein_coding	exon	chr5-114823313-114823468	757
2610524H06Rik	chr5-114826165-114826665	0.103855	0.303432	0.025	0.02	1	ENSMUST00000100850	ENSMUSG00000092486	protein_coding	exon	chr5-114823313-114823468	2696
2610528A11Rik	chr14-37112835-37113335	0.0719153	-0.252723	0.032	0.037	1	ENSMUST00000191317	ENSMUSG00000096001	protein_coding	gap	chr14-37107455-37113950	0
2610528J11Rik	chr4-118510523-118511023	0.30252	0.24477	0.017	0.013	1	ENSMUST00000106367	ENSMUSG00000028536	protein_coding	exon	chr4-118526999-118527244	15975
2610528J11Rik	chr4-118513463-118513963	0.0330921	0.273826	0.05	0.042	1	ENSMUST00000106367	ENSMUSG00000028536	protein_coding	exon	chr4-118526999-118527244	13035
2610528J11Rik	chr4-118515297-118515797	0.293586	-0.241431	0.013	0.014	1	ENSMUST00000106367	ENSMUSG00000028536	protein_coding	exon	chr4-118526999-118527244	11201
2700029M09Rik	chr8-60833980-60834480	0.0925017	0.350054	0.019	0.015	1	ENSMUST00000146863	ENSMUSG00000038005	protein_coding	exon	chr8-60890418-60890536	55937
2700029M09Rik	chr8-60865458-60865958	0.231648	0.173063	0.038	0.034	1	ENSMUST00000146863	ENSMUSG00000038005	protein_coding	exon	chr8-60890418-60890536	24459
2700029M09Rik	chr8-60900167-60900667	0.159736	-0.22551	0.024	0.028	1	ENSMUST00000037190	ENSMUSG00000038005	protein_coding	cds	chr8-60900084-60900234	0
2700033N17Rik	chr2-116066098-116066598	0.0333178	0.156456	0.153	0.134	1	ENSMUST00000140185	ENSMUSG00000086328	lincRNA	exon	chr2-116066218-116066618	0
2700046A07Rik	chr18-62758049-62758549	0.121744	-0.145681	0.066	0.071	1	ENSMUST00000048109	ENSMUSG00000041789	lincRNA	exon	chr18-62755924-62756347	1701
2700046A07Rik	chr18-62758648-62759148	0.305264	-0.229207	0.014	0.015	1	ENSMUST00000048109	ENSMUSG00000041789	lincRNA	exon	chr18-62755924-62756347	2300
2700046A07Rik	chr18-62764556-62765056	0.64005	-0.100624	0.013	0.014	1	ENSMUST00000048109	ENSMUSG00000041789	lincRNA	exon	chr18-62755924-62756347	8208
2700046A07Rik	chr18-62775774-62776274	0.114184	-0.281953	0.02	0.024	1	ENSMUST00000048109	ENSMUSG00000041789	lincRNA	exon	chr18-62755924-62756347	19426
2700046A07Rik	chr18-62814909-62815409	0.107816	-0.14183	0.077	0.081	1	ENSMUST00000048109	ENSMUSG00000041789	lincRNA	exon	chr18-62755924-62756347	58561
2700046G09Rik	chr19-32389449-32389949	0.000494808	0.314598	0.102	0.089	1	ENSMUST00000181612	ENSMUSG00000097787	lincRNA	gap	chr19-32389377-32389704	0
2700049A03Rik	chr12-71136942-71137442	0.100309	-0.113129	0.118	0.131	1	ENSMUST00000149564	ENSMUSG00000034601	protein_coding	utr	chr12-71136848-71137839	0
2700049A03Rik	chr12-71147588-71148088	0.579075	-0.126195	0.011	0.011	1	ENSMUST00000149564	ENSMUSG00000034601	protein_coding	gap	chr12-71142120-71148243	0
2700049A03Rik	chr12-71197642-71198142	0.146112	0.430301	0.01	0.007	1	ENSMUST00000149564	ENSMUSG00000034601	protein_coding	gap	chr12-71194467-71216041	0
2700049A03Rik	chr12-71217771-71218271	0.274808	0.286924	0.013	0.01	1	ENSMUST00000149564	ENSMUSG00000034601	protein_coding	gap	chr12-71216197-71219190	0
2700049A03Rik	chr12-71249348-71249848	0.405176	-0.145035	0.02	0.023	1	ENSMUST00000149564	ENSMUSG00000034601	protein_coding	utr	chr12-71243096-71243303	6044
2700049A03Rik	chr12-71252708-71253208	0.063096	0.550877	0.01	0.007	1	ENSMUST00000149564	ENSMUSG00000034601	protein_coding	utr	chr12-71243096-71243303	9404
2700060E02Rik	chr14-19812963-19813463	0.243599	0.184115	0.036	0.03	1	ENSMUST00000022341	ENSMUSG00000021807	protein_coding	gap	chr14-19812398-19814536	0
2700060E02Rik	chr14-19817904-19818404	0.0108736	0.355796	0.042	0.032	1	ENSMUST00000022341	ENSMUSG00000021807	protein_coding	gap	chr14-19817148-19819906	0
2700060E02Rik	chr14-19839766-19840266	0.440457	0.108236	0.045	0.042	1	ENSMUST00000022341	ENSMUSG00000021807	protein_coding	exon	chr14-19823669-19823823	15942
2700062C07Rik	chr18-24429080-24429580	0.349671	0.119428	0.048	0.046	1	ENSMUST00000097646	ENSMUSG00000024273	protein_coding	exon	chr18-24470861-24470980	41280
2700062C07Rik	chr18-24453010-24453510	0.109688	-0.380939	0.011	0.014	1	ENSMUST00000097646	ENSMUSG00000024273	protein_coding	exon	chr18-24470861-24470980	17350
2700062C07Rik	chr18-24466073-24466573	0.0729365	-0.483455	0.007	0.011	1	ENSMUST00000097646	ENSMUSG00000024273	protein_coding	exon	chr18-24470861-24470980	4287
2700081O15Rik	chr19-7417309-7417809	0.196373	0.105884	0.123	0.118	1	ENSMUST00000159348	ENSMUSG00000053080	protein_coding	cds	chr19-7417779-7417917	0
2700081O15Rik	chr19-7421327-7421827	0.210935	0.347005	0.012	0.01	1	ENSMUST00000191580	ENSMUSG00000053080	protein_coding	cds	chr19-7421397-7421432	0
2700081O15Rik	chr19-7421983-7422483	0.236959	0.128239	0.078	0.068	1	ENSMUST00000159348	ENSMUSG00000053080	protein_coding	cds	chr19-7421914-7422462	0
2700081O15Rik	chr19-7423721-7424221	0.36487	0.107352	0.066	0.062	1	ENSMUST00000159348	ENSMUSG00000053080	protein_coding	utr	chr19-7423107-7425904	0
2700089I24Rik	chr19-59542211-59542711	0.107782	0.498364	0.011	0.007	1	ENSMUST00000190204	ENSMUSG00000100119	lincRNA	gap	chr19-59493645-59556308	0
2700089I24Rik	chr19-59554219-59554719	0.00757101	-0.210284	0.097	0.111	1	ENSMUST00000190204	ENSMUSG00000100119	lincRNA	gap	chr19-59493645-59556308	0
2700089I24Rik	chr19-59587908-59588408	0.457813	0.170447	0.016	0.014	1	ENSMUST00000190204	ENSMUSG00000100119	lincRNA	exon	chr19-59558021-59559391	28516
2700094K13Rik	chr2-84669815-84670315	0.18163	0.411346	0.01	0.007	1	ENSMUST00000189988	ENSMUSG00000076437	protein_coding	cds	chr2-84670273-84670390	0
2700097O09Rik	chr12-55061047-55061547	0.20303	0.288247	0.018	0.013	1	ENSMUST00000021406	ENSMUSG00000062198	protein_coding	cds	chr12-55061055-55061193	0
2700097O09Rik	chr12-55078635-55079135	0.330036	-0.256243	0.009	0.01	1	ENSMUST00000156852	ENSMUSG00000062198	protein_coding	gap	chr12-55063110-55079980	0
2810002D19Rik	chr2-94407032-94407532	0.448836	0.194344	0.015	0.013	1	ENSMUST00000152313	ENSMUSG00000045464	processed_transcript	gap	chr2-94406967-94410458	0
2810006K23Rik	chr5-124328284-124328784	0.00556414	0.386666	0.046	0.037	1	ENSMUST00000111477	ENSMUSG00000047635	protein_coding	gap	chr5-124328230-124338626	0
2810006K23Rik	chr5-124334395-124334895	0.501769	-0.125149	0.017	0.017	1	ENSMUST00000111477	ENSMUSG00000047635	protein_coding	gap	chr5-124328230-124338626	0
2810008D09Rik	chr11-117072124-117072624	0.0126394	0.26359	0.072	0.06	1	ENSMUST00000145438	ENSMUSG00000086859	lincRNA	exon	chr11-117076790-117076898	4165
2810008D09Rik	chr11-117076506-117077006	0.0506755	0.147748	0.134	0.118	1	ENSMUST00000145438	ENSMUSG00000086859	lincRNA	gap	chr11-117076899-117077107	0
2810008D09Rik	chr11-117081678-117082178	0.005986	0.234695	0.107	0.093	1	ENSMUST00000149822	ENSMUSG00000086859	lincRNA	exon	chr11-117078776-117078955	2722
2810021J22Rik	chr11-58867009-58867509	0.441392	0.109985	0.044	0.04	1	ENSMUST00000132570	ENSMUSG00000020491	protein_coding	utr	chr11-58867267-58867309	0
2810030D12Rik	chr8-13201057-13201557	0.0581199	0.473939	0.015	0.011	1	ENSMUST00000190673	ENSMUSG00000099338	lincRNA	gap	chr8-13201294-13207363	0
2810030D12Rik	chr8-13212892-13213392	0.580757	0.171739	0.01	0.008	1	ENSMUST00000185622	ENSMUSG00000099338	lincRNA	exon	chr8-13207526-13207714	5177
2810030D12Rik	chr8-13209750-13210250	0.484138	-0.154587	0.014	0.013	1	ENSMUST00000185622	ENSMUSG00000099338	lincRNA	exon	chr8-13207526-13207714	2035
2810032G03Rik	chr12-5376118-5376618	0.0143482	0.539344	0.02	0.014	1	ENSMUST00000037953	ENSMUSG00000037735	lincRNA	gap	chr12-5376529-5414901	0
2810032G03Rik	chr12-5382034-5382534	0.0147051	-0.266243	0.049	0.057	1	ENSMUST00000037953	ENSMUSG00000037735	lincRNA	gap	chr12-5376529-5414901	0
2810032G03Rik	chr12-5411329-5411829	0.202582	0.346881	0.012	0.01	1	ENSMUST00000037953	ENSMUSG00000037735	lincRNA	gap	chr12-5376529-5414901	0
2810032G03Rik	chr12-5432648-5433148	0.016485	-0.2874	0.041	0.05	1	ENSMUST00000163627	ENSMUSG00000037735	lincRNA	exon	chr12-5414902-5416631	16016
2810032G03Rik	chr12-5443665-5444165	0.229362	0.13344	0.071	0.062	1	ENSMUST00000163627	ENSMUSG00000037735	lincRNA	exon	chr12-5414902-5416631	27033
2810032G03Rik	chr12-5551820-5552320	0.49207	0.179672	0.013	0.011	1	ENSMUST00000163627	ENSMUSG00000037735	lincRNA	exon	chr12-5414902-5416631	135188
2810403A07Rik	chr3-88684885-88685385	0.500585	0.121498	0.031	0.029	1	ENSMUST00000029696	ENSMUSG00000028060	protein_coding	exon	chr3-88685794-88685887	408
2810403A07Rik	chr3-88686079-88686579	0.325741	0.108927	0.077	0.07	1	ENSMUST00000029696	ENSMUSG00000028060	protein_coding	cds	chr3-88686344-88686566	0
2810404F17Rik	chr16-95769579-95770079	0.486407	0.118794	0.03	0.028	1	ENSMUST00000156615	ENSMUSG00000085329	lincRNA	exon	chr16-95806029-95807490	35949
2810404M03Rik	chr8-41648045-41648545	0.14058	-0.176889	0.043	0.046	1	ENSMUST00000188324	ENSMUSG00000102046	lincRNA	exon	chr8-41827267-41827470	178721
2810404M03Rik	chr8-41692005-41692505	0.108199	-0.190364	0.043	0.049	1	ENSMUST00000188324	ENSMUSG00000102046	lincRNA	exon	chr8-41827267-41827470	134761
2810404M03Rik	chr8-41921060-41921560	0.352028	-0.225445	0.011	0.012	1	ENSMUST00000188324	ENSMUSG00000102046	lincRNA	gap	chr8-41877172-42026660	0
2810404M03Rik	chr8-42402823-42403323	0.0502086	-0.435651	0.013	0.017	1	ENSMUST00000188324	ENSMUSG00000102046	lincRNA	exon	chr8-42045604-42046202	356620
2810404M03Rik	chr8-42324581-42325081	0.0418002	-0.488656	0.011	0.015	1	ENSMUST00000188324	ENSMUSG00000102046	lincRNA	exon	chr8-42045604-42046202	278378
2810405F17Rik	chr4-137375255-137375755	0.505698	-0.118823	0.019	0.019	1	ENSMUST00000189334	ENSMUSG00000101493	lincRNA	exon	chr4-137387266-137388382	11510
2810405F17Rik	chr4-137378827-137379327	0.0154238	-0.420595	0.021	0.025	1	ENSMUST00000189334	ENSMUSG00000101493	lincRNA	exon	chr4-137387266-137388382	7938
2810405F17Rik	chr4-137388907-137389407	0.0161488	0.322139	0.051	0.041	1	ENSMUST00000189334	ENSMUSG00000101493	lincRNA	exon	chr4-137387266-137388382	524
2810407A14Rik	chr16-87765943-87766443	0.12806	0.380456	0.014	0.01	1	ENSMUST00000069809	ENSMUSG00000055972	lincRNA	exon	chr16-87784075-87784592	17631
2810407A14Rik	chr16-87774323-87774823	0.021448	0.626679	0.012	0.008	1	ENSMUST00000069809	ENSMUSG00000055972	lincRNA	exon	chr16-87784075-87784592	9251
2810407A14Rik	chr16-87833979-87834479	0.0114012	-0.211876	0.085	0.1	1	ENSMUST00000189929	ENSMUSG00000055972	lincRNA	gap	chr16-87833786-87835646	0
2810407A14Rik	chr16-87861736-87862236	0.0946511	-0.353891	0.014	0.018	1	ENSMUST00000189929	ENSMUSG00000055972	lincRNA	exon	chr16-87838025-87839293	22442
2810408A11Rik	chr11-69900821-69901321	0.0318276	0.126037	0.215	0.195	1	ENSMUST00000144431	ENSMUSG00000018570	protein_coding	utr	chr11-69900752-69900975	0
2810410L24Rik	chr11-120182191-120182691	0.40368	-0.196719	0.01	0.012	1	ENSMUST00000155681	ENSMUSG00000075389	processed_transcript	exon	chr11-120185400-120187751	2708
2810410L24Rik	chr11-120184639-120185139	0.151041	0.327034	0.018	0.014	1	ENSMUST00000155681	ENSMUSG00000075389	processed_transcript	exon	chr11-120185400-120187751	260
2810410L24Rik	chr11-120185141-120185641	0.302088	0.228235	0.018	0.017	1	ENSMUST00000155681	ENSMUSG00000075389	processed_transcript	exon	chr11-120185400-120187751	0
2810410L24Rik	chr11-120186680-120187180	0.268749	0.230241	0.02	0.018	1	ENSMUST00000155681	ENSMUSG00000075389	processed_transcript	exon	chr11-120185400-120187751	0
2810410L24Rik	chr11-120187420-120187920	0.346985	0.187244	0.023	0.02	1	ENSMUST00000155681	ENSMUSG00000075389	processed_transcript	gap	chr11-120187752-120188488	0
2810410L24Rik	chr11-120187988-120188488	0.496915	0.166507	0.015	0.014	1	ENSMUST00000155681	ENSMUSG00000075389	processed_transcript	gap	chr11-120187752-120188488	0
2810410L24Rik	chr11-120188660-120189160	0.0307179	-0.308945	0.032	0.038	1	ENSMUST00000145437	ENSMUSG00000075389	processed_transcript	gap	chr11-120188677-120189439	0
2810410L24Rik	chr11-120199729-120200229	0.303266	0.309704	0.01	0.007	1	ENSMUST00000145437	ENSMUSG00000075389	processed_transcript	exon	chr11-120189440-120189852	9876
2810414N06Rik	chr1-151754353-151754853	0.295394	0.161139	0.038	0.036	1	ENSMUST00000186444	ENSMUSG00000100594	lincRNA	gap	chr1-151750229-151754917	0
2810425M01Rik	chr10-77495839-77496339	0.196699	-0.196769	0.027	0.031	1	ENSMUST00000180790	ENSMUSG00000097811	lincRNA	gap	chr10-77487433-77515284	0
2810425M01Rik	chr10-77509881-77510381	0.107272	0.312238	0.025	0.02	1	ENSMUST00000180790	ENSMUSG00000097811	lincRNA	gap	chr10-77487433-77515284	0
2810428I15Rik	chr8-70504822-70505322	0.107139	0.168247	0.078	0.066	1	ENSMUST00000136913	ENSMUSG00000058833	protein_coding	cds	chr8-70504984-70505060	0
2810428I15Rik	chr8-70505586-70506086	0.436479	0.234233	0.011	0.01	1	ENSMUST00000136913	ENSMUSG00000058833	protein_coding	cds	chr8-70505756-70505960	0
2810428I15Rik	chr8-70506206-70506706	0.00173215	0.190578	0.2	0.177	1	ENSMUST00000136913	ENSMUSG00000058833	protein_coding	cds	chr8-70506662-70506733	0
2810429I04Rik	chr13-3477960-3478460	0.588625	0.115648	0.022	0.019	1	ENSMUST00000191585	ENSMUSG00000097709	lincRNA	gap	chr13-3478353-3479908	0
2810430I11Rik	chr2-27858223-27858723	0.515186	0.164896	0.015	0.012	1	ENSMUST00000154246	ENSMUSG00000085766	processed_transcript	exon	chr2-27882925-27886113	24201
2810430I11Rik	chr2-27885402-27885902	0.138432	0.263992	0.03	0.024	1	ENSMUST00000154246	ENSMUSG00000085766	processed_transcript	exon	chr2-27882925-27886113	0
2810433D01Rik	chr11-102633356-102633856	0.0188457	0.31629	0.045	0.038	1	ENSMUST00000154798	ENSMUSG00000086283	lincRNA	exon	chr11-102624278-102624416	8939
2810459M11Rik	chr1-86039252-86039752	0.0135857	0.438021	0.028	0.021	1	ENSMUST00000027429	ENSMUSG00000026227	protein_coding	exon	chr1-86045863-86046572	6110
2810459M11Rik	chr1-86044969-86045469	0.0525858	-0.4747	0.011	0.014	1	ENSMUST00000027429	ENSMUSG00000026227	protein_coding	exon	chr1-86045863-86046572	393
2810459M11Rik	chr1-86046134-86046634	0.117703	-0.111529	0.113	0.118	1	ENSMUST00000165824	ENSMUSG00000026227	protein_coding	cds	chr1-86045963-86046572	0
2810459M11Rik	chr1-86047047-86047547	0.445533	0.104495	0.051	0.045	1	ENSMUST00000165824	ENSMUSG00000026227	protein_coding	gap	chr1-86046573-86048587	0
2810468N07Rik	chr17-25571496-25571996	0.496193	-0.139134	0.014	0.015	1	ENSMUST00000163493	ENSMUSG00000091475	processed_transcript	gap	chr17-25571102-25573985	0
2810471M01Rik	chr11-28636730-28637230	0.00966318	-0.459467	0.018	0.025	1	ENSMUST00000146554	ENSMUSG00000084966	lincRNA	exon	chr11-28681564-28682119	44333
2810471M01Rik	chr11-28649416-28649916	0.000980398	-0.707704	0.013	0.02	1	ENSMUST00000146554	ENSMUSG00000084966	lincRNA	exon	chr11-28681564-28682119	31647
2810474O19Rik	chr6-149314790-149315290	0.0771396	0.324224	0.027	0.02	1	ENSMUST00000190785	ENSMUSG00000032712	protein_coding	gap	chr6-149310378-149317634	0
2900011O08Rik	chr16-14058373-14058873	0.199997	0.162017	0.052	0.046	1	ENSMUST00000131608	ENSMUSG00000044117	protein_coding	gap	chr16-13986894-14088945	0
2900011O08Rik	chr16-13986353-13986853	0.149817	0.254598	0.029	0.023	1	ENSMUST00000118412	ENSMUSG00000044117	protein_coding	cds	chr16-13986791-13986893	0
2900011O08Rik	chr16-14004174-14004674	0.33447	-0.137599	0.028	0.032	1	ENSMUST00000131608	ENSMUSG00000044117	protein_coding	gap	chr16-13986894-14088945	0
2900011O08Rik	chr16-14005196-14005696	0.0134583	-0.537588	0.013	0.017	1	ENSMUST00000131608	ENSMUSG00000044117	protein_coding	gap	chr16-13986894-14088945	0
2900011O08Rik	chr16-14025529-14026029	0.148001	-0.144136	0.062	0.066	1	ENSMUST00000131608	ENSMUSG00000044117	protein_coding	gap	chr16-13986894-14088945	0
2900011O08Rik	chr16-14030609-14031109	0.507445	-0.170409	0.009	0.01	1	ENSMUST00000131608	ENSMUSG00000044117	protein_coding	gap	chr16-13986894-14088945	0
2900026A02Rik	chr5-113091101-113091601	0.502699	0.131505	0.022	0.02	1	ENSMUST00000050125	ENSMUSG00000051339	protein_coding	gap	chr5-113091025-113092414	0
2900026A02Rik	chr5-113099487-113099987	0.165226	-0.107549	0.088	0.097	1	ENSMUST00000050125	ENSMUSG00000051339	protein_coding	gap	chr5-113097839-113101458	0
2900026A02Rik	chr5-113138694-113139194	0.0237257	-0.42432	0.019	0.023	1	ENSMUST00000050125	ENSMUSG00000051339	protein_coding	gap	chr5-113101578-113163057	0
2900026A02Rik	chr5-113151228-113151728	0.212178	-0.197965	0.025	0.028	1	ENSMUST00000050125	ENSMUSG00000051339	protein_coding	gap	chr5-113101578-113163057	0
2900026A02Rik	chr5-113153153-113153653	0.133338	-0.201414	0.035	0.039	1	ENSMUST00000050125	ENSMUSG00000051339	protein_coding	gap	chr5-113101578-113163057	0
2900026A02Rik	chr5-113163098-113163598	0.0782001	0.448794	0.013	0.01	1	ENSMUST00000050125	ENSMUSG00000051339	protein_coding	cds	chr5-113163058-113163108	0
2900026A02Rik	chr5-113164366-113164866	0.142215	0.363704	0.015	0.013	1	ENSMUST00000050125	ENSMUSG00000051339	protein_coding	exon	chr5-113163058-113163351	1014
2900026A02Rik	chr5-113165425-113165925	0.0645124	0.436154	0.017	0.013	1	ENSMUST00000050125	ENSMUSG00000051339	protein_coding	exon	chr5-113163058-113163351	2073
2900026A02Rik	chr5-113174874-113175374	0.0104316	0.791391	0.011	0.007	1	ENSMUST00000050125	ENSMUSG00000051339	protein_coding	exon	chr5-113163058-113163351	11522
2900026A02Rik	chr5-113179411-113179911	0.688774	0.125733	0.01	0.009	1	ENSMUST00000050125	ENSMUSG00000051339	protein_coding	exon	chr5-113163058-113163351	16059
2900041M22Rik	chr11-117628104-117628604	0.456505	0.214372	0.012	0.011	1	ENSMUST00000155384	ENSMUSG00000054418	processed_transcript	exon	chr11-117612262-117613857	14246
2900052L18Rik	chr11-120223843-120224343	0.0212005	0.487217	0.021	0.016	1	ENSMUST00000139014	ENSMUSG00000043993	processed_transcript	exon	chr11-120229802-120231298	5458
2900052L18Rik	chr11-120228250-120228750	0.149397	0.416379	0.011	0.009	1	ENSMUST00000139014	ENSMUSG00000043993	processed_transcript	exon	chr11-120229802-120231298	1051
2900052L18Rik	chr11-120229837-120230337	0.137883	0.158718	0.075	0.066	1	ENSMUST00000139014	ENSMUSG00000043993	processed_transcript	exon	chr11-120229802-120231298	0
2900052L18Rik	chr11-120230738-120231238	0.0889728	-0.218447	0.038	0.042	1	ENSMUST00000139014	ENSMUSG00000043993	processed_transcript	exon	chr11-120229802-120231298	0
2900052N01Rik	chr9-46737292-46737792	0.00215328	-0.361723	0.045	0.053	1	ENSMUST00000191603	ENSMUSG00000099696	lincRNA	exon	chr9-46913493-46913746	175700
2900052N01Rik	chr9-46735503-46736003	0.0526659	-0.109199	0.164	0.174	1	ENSMUST00000191603	ENSMUSG00000099696	lincRNA	exon	chr9-46913493-46913746	177489
2900052N01Rik	chr9-46737919-46738419	0.222989	-0.114039	0.066	0.069	1	ENSMUST00000191603	ENSMUSG00000099696	lincRNA	exon	chr9-46913493-46913746	175073
2900052N01Rik	chr9-46746131-46746631	0.429378	-0.157271	0.015	0.016	1	ENSMUST00000191603	ENSMUSG00000099696	lincRNA	exon	chr9-46913493-46913746	166861
2900052N01Rik	chr9-46736309-46736809	0.0619939	-0.279685	0.029	0.034	1	ENSMUST00000191603	ENSMUSG00000099696	lincRNA	exon	chr9-46913493-46913746	176683
2900052N01Rik	chr9-46824668-46825168	0.157786	-0.1184	0.08	0.086	1	ENSMUST00000191603	ENSMUSG00000099696	lincRNA	exon	chr9-46913493-46913746	88324
2900052N01Rik	chr9-46845217-46845717	0.191423	0.134487	0.075	0.071	1	ENSMUST00000191603	ENSMUSG00000099696	lincRNA	exon	chr9-46913493-46913746	67775
2900052N01Rik	chr9-46795377-46795877	0.390117	0.234017	0.011	0.01	1	ENSMUST00000191603	ENSMUSG00000099696	lincRNA	exon	chr9-46913493-46913746	117615
2900052N01Rik	chr9-46816007-46816507	0.166934	-0.375547	0.009	0.01	1	ENSMUST00000191603	ENSMUSG00000099696	lincRNA	exon	chr9-46913493-46913746	96985
2900052N01Rik	chr9-46915348-46915848	0.195173	0.155872	0.057	0.053	1	ENSMUST00000191603	ENSMUSG00000099696	lincRNA	gap	chr9-46913747-46920530	0
2900052N01Rik	chr9-46955182-46955682	0.174837	0.378254	0.011	0.01	1	ENSMUST00000191603	ENSMUSG00000099696	lincRNA	exon	chr9-46926423-46927366	27815
2900052N01Rik	chr9-46956193-46956693	0.0499859	-0.130855	0.129	0.138	1	ENSMUST00000191603	ENSMUSG00000099696	lincRNA	exon	chr9-46926423-46927366	28826
2900052N01Rik	chr9-46904842-46905342	0.0419972	0.206277	0.079	0.07	1	ENSMUST00000191603	ENSMUSG00000099696	lincRNA	exon	chr9-46913493-46913746	8150
2900052N01Rik	chr9-46760038-46760538	0.157373	-0.249671	0.022	0.024	1	ENSMUST00000191603	ENSMUSG00000099696	lincRNA	exon	chr9-46913493-46913746	152954
2900052N01Rik	chr9-46901508-46902008	0.367823	0.257561	0.01	0.011	1	ENSMUST00000191603	ENSMUSG00000099696	lincRNA	exon	chr9-46913493-46913746	11484
2900052N01Rik	chr9-46903700-46904200	0.443413	-0.203369	0.009	0.011	1	ENSMUST00000191603	ENSMUSG00000099696	lincRNA	exon	chr9-46913493-46913746	9292
2900052N01Rik	chr9-46912383-46912883	0.131419	0.192762	0.053	0.046	1	ENSMUST00000191603	ENSMUSG00000099696	lincRNA	exon	chr9-46913493-46913746	609
2900052N01Rik	chr9-46783603-46784103	0.223086	0.354909	0.011	0.009	1	ENSMUST00000191603	ENSMUSG00000099696	lincRNA	exon	chr9-46913493-46913746	129389
2900052N01Rik	chr9-46784260-46784760	0.204525	0.194584	0.037	0.034	1	ENSMUST00000191603	ENSMUSG00000099696	lincRNA	exon	chr9-46913493-46913746	128732
2900052N01Rik	chr9-46852194-46852694	0.289681	-0.18559	0.02	0.023	1	ENSMUST00000191603	ENSMUSG00000099696	lincRNA	exon	chr9-46913493-46913746	60798
2900052N01Rik	chr9-46898671-46899171	0.26647	0.110028	0.087	0.085	1	ENSMUST00000191603	ENSMUSG00000099696	lincRNA	exon	chr9-46913493-46913746	14321
2900052N01Rik	chr9-46905451-46905951	0.375992	-0.151391	0.022	0.024	1	ENSMUST00000191603	ENSMUSG00000099696	lincRNA	exon	chr9-46913493-46913746	7541
2900052N01Rik	chr9-46911851-46912351	0.209765	0.282332	0.019	0.014	1	ENSMUST00000191603	ENSMUSG00000099696	lincRNA	exon	chr9-46913493-46913746	1141
2900052N01Rik	chr9-46890959-46891459	0.33712	-0.227581	0.011	0.013	1	ENSMUST00000191603	ENSMUSG00000099696	lincRNA	exon	chr9-46913493-46913746	22033
2900052N01Rik	chr9-46891836-46892336	0.2569	-0.217406	0.017	0.019	1	ENSMUST00000191603	ENSMUSG00000099696	lincRNA	exon	chr9-46913493-46913746	21156
2900052N01Rik	chr9-46914390-46914890	0.0782066	0.232589	0.051	0.043	1	ENSMUST00000191603	ENSMUSG00000099696	lincRNA	gap	chr9-46913747-46920530	0
2900076A07Rik	chr7-81523764-81524264	0.448129	0.174988	0.017	0.015	1	ENSMUST00000181903	ENSMUSG00000097277	lincRNA	gap	chr7-81523677-81528786	0
2900079G21Rik	chr9-112561273-112561773	0.361064	-0.14873	0.023	0.025	1	ENSMUST00000163302	ENSMUSG00000087038	lincRNA	exon	chr9-112346536-112348925	212347
2900079G21Rik	chr9-112715304-112715804	0.14055	0.358819	0.016	0.012	1	ENSMUST00000163302	ENSMUSG00000087038	lincRNA	exon	chr9-112346536-112348925	366378
2900079G21Rik	chr9-112807710-112808210	0.23506	-0.174761	0.027	0.032	1	ENSMUST00000163302	ENSMUSG00000087038	lincRNA	exon	chr9-112346536-112348925	458784
2900089D17Rik	chr5-144234533-144235033	0.0295994	0.32144	0.039	0.032	1	ENSMUST00000124015	ENSMUSG00000087484	processed_transcript	exon	chr5-144241690-144242090	6656
2900089D17Rik	chr5-144252108-144252608	0.388932	-0.21264	0.01	0.011	1	ENSMUST00000153130	ENSMUSG00000087484	processed_transcript	gap	chr5-144242091-144256078	0
3010003L21Rik	chr6-148946971-148947471	0.0672443	0.494862	0.012	0.009	1	ENSMUST00000154673	ENSMUSG00000085355	lincRNA	exon	chr6-148946937-148947129	0
3100002H09Rik	chr4-124592302-124592802	0.0242188	0.562757	0.015	0.011	1	ENSMUST00000053604	ENSMUSG00000051219	protein_coding	utr	chr4-124609931-124610334	17128
3100002H09Rik	chr4-124624147-124624647	0.0129528	-0.208722	0.086	0.098	1	ENSMUST00000053604	ENSMUSG00000051219	protein_coding	exon	chr4-124609931-124610803	13343
3100002H09Rik	chr4-124633225-124633725	0.412829	0.144636	0.025	0.024	1	ENSMUST00000053604	ENSMUSG00000051219	protein_coding	exon	chr4-124609931-124610803	22421
3100003L05Rik	chr7-124935665-124936165	0.209379	-0.137861	0.05	0.054	1	ENSMUST00000130240	ENSMUSG00000086254	processed_transcript	exon	chr7-124708764-124708935	226729
3100003L05Rik	chr7-124951717-124952217	0.0563963	0.342737	0.027	0.021	1	ENSMUST00000130240	ENSMUSG00000086254	processed_transcript	exon	chr7-124708764-124708935	242781
3110002H16Rik	chr18-12167766-12168266	0.00204447	0.303003	0.086	0.07	1	ENSMUST00000025276	ENSMUSG00000024410	protein_coding	exon	chr18-12168717-12168902	450
3110002H16Rik	chr18-12169250-12169750	0.229525	0.24702	0.022	0.018	1	ENSMUST00000025276	ENSMUSG00000024410	protein_coding	cds	chr18-12169233-12169309	0
3110004A20Rik	chr11-40434207-40434707	0.108227	0.235244	0.039	0.035	1	ENSMUST00000123904	ENSMUSG00000085588	lincRNA	exon	chr11-40474718-40474964	40010
3110007F17Rik	chrX-123102721-123103221	0.0881198	0.252395	0.042	0.034	1	ENSMUST00000113343	ENSMUSG00000079450	protein_coding	exon	chrX-123103495-123103637	273
3110007F17Rik	chrX-123103833-123104333	0.000253044	0.45955	0.057	0.044	1	ENSMUST00000153946	ENSMUSG00000079450	protein_coding	gap	chrX-123103638-123117453	0
3110007F17Rik	chrX-123104671-123105171	0.201766	0.283718	0.018	0.014	1	ENSMUST00000153946	ENSMUSG00000079450	protein_coding	gap	chrX-123103638-123117453	0
3110007F17Rik	chrX-123103225-123103725	0.0358545	0.129969	0.194	0.178	1	ENSMUST00000113348	ENSMUSG00000079450	protein_coding	utr	chrX-123103559-123103637	0
3110009E18Rik	chr1-120146961-120147461	0.0336012	0.372701	0.026	0.021	1	ENSMUST00000112644	ENSMUSG00000026388	protein_coding	gap	chr1-120121218-120150602	0
3110009E18Rik	chr1-120155270-120155770	0.541687	0.120774	0.021	0.02	1	ENSMUST00000187809	ENSMUSG00000026388	protein_coding	gap	chr1-120150748-120160605	0
3110009E18Rik	chr1-120176195-120176695	0.235336	-0.246944	0.014	0.017	1	ENSMUST00000112644	ENSMUSG00000026388	protein_coding	gap	chr1-120171483-120188040	0
3110009E18Rik	chr1-120186136-120186636	0.268043	-0.23498	0.014	0.016	1	ENSMUST00000112644	ENSMUSG00000026388	protein_coding	gap	chr1-120171483-120188040	0
3110018I06Rik	chr12-107476890-107477390	0.3788	0.143346	0.033	0.031	1	ENSMUST00000082269	ENSMUSG00000060375	protein_coding	exon	chr12-107488632-107489636	11241
3110021A11Rik	chr6-119847952-119848452	0.00390109	-0.104153	0.322	0.343	1	ENSMUST00000062454	ENSMUSG00000050604	protein_coding	cds	chr6-119848195-119848632	0
3110021A11Rik	chr6-119849151-119849651	0.115535	0.514471	0.01	0.006	1	ENSMUST00000062454	ENSMUSG00000050604	protein_coding	utr	chr6-119848633-119849013	137
3110021A11Rik	chr6-119851513-119852013	0.155362	-0.181046	0.036	0.041	1	ENSMUST00000062454	ENSMUSG00000050604	protein_coding	utr	chr6-119848633-119849013	2499
3110021N24Rik	chr4-108745465-108745965	0.097673	-0.482344	0.007	0.01	1	ENSMUST00000178992	ENSMUSG00000094958	protein_coding	gap	chr4-108727546-108780452	0
3110021N24Rik	chr4-108781503-108782003	0.167789	0.328615	0.016	0.013	1	ENSMUST00000178992	ENSMUSG00000094958	protein_coding	utr	chr4-108780897-108781904	0
3110021N24Rik	chr4-108782299-108782799	0.42379	0.231452	0.012	0.01	1	ENSMUST00000178992	ENSMUSG00000094958	protein_coding	utr	chr4-108780897-108781904	394
3110035E14Rik	chr1-9619561-9620061	0.049282	0.48311	0.014	0.01	1	ENSMUST00000088666	ENSMUSG00000067879	protein_coding	cds	chr1-9619836-9619897	0
3110039M20Rik	chr12-49388145-49388645	0.20896	0.223374	0.027	0.023	1	ENSMUST00000110746	ENSMUSG00000089922	protein_coding	gap	chr12-49385819-49389867	0
3110039M20Rik	chr12-49389565-49390065	0.137869	-0.308793	0.014	0.019	1	ENSMUST00000110746	ENSMUSG00000089922	protein_coding	cds	chr12-49389868-49389939	0
3110039M20Rik	chr12-49390166-49390666	0.0484108	-0.278004	0.031	0.037	1	ENSMUST00000110746	ENSMUSG00000089922	protein_coding	cds	chr12-49390403-49390470	0
3110039M20Rik	chr12-49390782-49391282	0.021857	-0.288965	0.043	0.049	1	ENSMUST00000110746	ENSMUSG00000089922	protein_coding	cds	chr12-49391009-49391242	0
3110039M20Rik	chr12-49392030-49392530	0.406175	0.147869	0.03	0.028	1	ENSMUST00000110746	ENSMUSG00000089922	protein_coding	utr	chr12-49391243-49394127	0
3110039M20Rik	chr12-49392739-49393239	0.0725942	-0.417991	0.011	0.015	1	ENSMUST00000110746	ENSMUSG00000089922	protein_coding	utr	chr12-49391243-49394127	0
3110039M20Rik	chr12-49394071-49394571	0.0575045	0.49775	0.013	0.009	1	ENSMUST00000110746	ENSMUSG00000089922	protein_coding	utr	chr12-49391243-49394127	0
3110039M20Rik	chr12-49394718-49395218	0.0669998	-0.191634	0.056	0.063	1	ENSMUST00000145291	ENSMUSG00000089922	protein_coding	gap	chr12-49390756-49406848	0
3110039M20Rik	chr12-49398079-49398579	0.669206	-0.104061	0.009	0.01	1	ENSMUST00000145291	ENSMUSG00000089922	protein_coding	gap	chr12-49390756-49406848	0
3110039M20Rik	chr12-49400003-49400503	0.0598173	0.257497	0.048	0.038	1	ENSMUST00000145291	ENSMUSG00000089922	protein_coding	gap	chr12-49390756-49406848	0
3110040N11Rik	chr7-81788475-81788975	0.0942377	0.425534	0.015	0.01	1	ENSMUST00000152620	ENSMUSG00000025102	protein_coding	cds	chr7-81788572-81788576	0
3110040N11Rik	chr7-81789241-81789741	0.0548755	0.13277	0.164	0.149	1	ENSMUST00000152620	ENSMUSG00000025102	protein_coding	cds	chr7-81789252-81789384	0
3110040N11Rik	chr7-81789873-81790373	0.400235	0.272493	0.01	0.008	1	ENSMUST00000026092	ENSMUSG00000025102	protein_coding	exon	chr7-81789355-81789478	394
3110043O21Rik	chr4-35192740-35193240	0.0773615	0.467315	0.012	0.009	1	ENSMUST00000108127	ENSMUSG00000028300	protein_coding	cds	chr4-35193185-35193294	0
3110043O21Rik	chr4-35219478-35219978	0.396461	0.217868	0.013	0.012	1	ENSMUST00000156472	ENSMUSG00000028300	protein_coding	gap	chr4-35218917-35226115	0
3110062M04Rik	chr6-34877198-34877698	0.396948	0.211441	0.015	0.013	1	ENSMUST00000055097	ENSMUSG00000046806	protein_coding	utr	chr6-34877575-34878021	0
3110062M04Rik	chr6-34878551-34879051	0.324217	0.217652	0.019	0.017	1	ENSMUST00000115007	ENSMUSG00000046806	protein_coding	exon	chr6-34877900-34878060	490
3110079O15Rik	chr1-87470062-87470562	0.0972473	-0.471749	0.008	0.01	1	ENSMUST00000027476	ENSMUSG00000026258	protein_coding	cds	chr1-87470339-87470411	0
3110079O15Rik	chr1-87471850-87472350	0.131494	-0.184321	0.044	0.046	1	ENSMUST00000027476	ENSMUSG00000026258	protein_coding	gap	chr1-87470412-87475022	0
3110079O15Rik	chr1-87472531-87473031	0.000310921	-0.482387	0.035	0.046	1	ENSMUST00000191095	ENSMUSG00000026258	protein_coding	gap	chr1-87472783-87475022	0
3110079O15Rik	chr1-87473773-87474273	0.0775134	-0.290916	0.024	0.027	1	ENSMUST00000191095	ENSMUSG00000026258	protein_coding	gap	chr1-87472783-87475022	0
3110079O15Rik	chr1-87474300-87474800	0.203087	-0.17736	0.033	0.036	1	ENSMUST00000191095	ENSMUSG00000026258	protein_coding	gap	chr1-87472783-87475022	0
3110079O15Rik	chr1-87475324-87475824	0.166122	-0.138757	0.061	0.065	1	ENSMUST00000027476	ENSMUSG00000026258	protein_coding	cds	chr1-87475329-87475438	0
3110082I17Rik	chr5-139358540-139359040	0.429936	0.1302	0.031	0.027	1	ENSMUST00000066052	ENSMUSG00000053553	protein_coding	utr	chr5-139359739-139360544	698
3110082I17Rik	chr5-139364398-139364898	0.072674	0.149987	0.124	0.11	1	ENSMUST00000066052	ENSMUSG00000053553	protein_coding	gap	chr5-139364164-139455416	0
3110082I17Rik	chr5-139364977-139365477	0.0846556	0.179531	0.08	0.069	1	ENSMUST00000066052	ENSMUSG00000053553	protein_coding	gap	chr5-139364164-139455416	0
3110082I17Rik	chr5-139366411-139366911	0.325009	-0.183054	0.018	0.02	1	ENSMUST00000066052	ENSMUSG00000053553	protein_coding	gap	chr5-139364164-139455416	0
3110082I17Rik	chr5-139370547-139371047	0.605226	0.153678	0.011	0.01	1	ENSMUST00000066052	ENSMUSG00000053553	protein_coding	gap	chr5-139364164-139455416	0
3110082I17Rik	chr5-139371094-139371594	0.67693	0.100847	0.017	0.016	1	ENSMUST00000066052	ENSMUSG00000053553	protein_coding	gap	chr5-139364164-139455416	0
3110082I17Rik	chr5-139372011-139372511	0.00803733	-0.138726	0.185	0.198	1	ENSMUST00000066052	ENSMUSG00000053553	protein_coding	gap	chr5-139364164-139455416	0
3110082I17Rik	chr5-139397766-139398266	0.325906	0.279852	0.012	0.01	1	ENSMUST00000066052	ENSMUSG00000053553	protein_coding	gap	chr5-139364164-139455416	0
3110082I17Rik	chr5-139418591-139419091	0.0129311	-0.237163	0.066	0.077	1	ENSMUST00000066052	ENSMUSG00000053553	protein_coding	gap	chr5-139364164-139455416	0
3110082I17Rik	chr5-139427964-139428464	0.11422	-0.271742	0.021	0.024	1	ENSMUST00000066052	ENSMUSG00000053553	protein_coding	gap	chr5-139364164-139455416	0
3110082I17Rik	chr5-139430326-139430826	0.0801097	0.475013	0.013	0.009	1	ENSMUST00000066052	ENSMUSG00000053553	protein_coding	gap	chr5-139364164-139455416	0
3110082I17Rik	chr5-139434908-139435408	0.00311458	-0.266451	0.074	0.084	1	ENSMUST00000066052	ENSMUSG00000053553	protein_coding	gap	chr5-139364164-139455416	0
3110082I17Rik	chr5-139438395-139438895	0.0509517	0.409448	0.02	0.015	1	ENSMUST00000066052	ENSMUSG00000053553	protein_coding	gap	chr5-139364164-139455416	0
3110082I17Rik	chr5-139445195-139445695	0.123227	0.220221	0.04	0.034	1	ENSMUST00000066052	ENSMUSG00000053553	protein_coding	gap	chr5-139364164-139455416	0
3110082I17Rik	chr5-139453028-139453528	0.0105382	-0.137234	0.185	0.199	1	ENSMUST00000066052	ENSMUSG00000053553	protein_coding	gap	chr5-139364164-139455416	0
3110083C13Rik	chr14-58034526-58035026	0.392221	0.167314	0.022	0.019	1	ENSMUST00000180534	ENSMUSG00000097303	lincRNA	exon	chr14-58002980-58003695	30830
3110083C13Rik	chr14-58036129-58036629	0.0561556	0.227422	0.059	0.05	1	ENSMUST00000180534	ENSMUSG00000097303	lincRNA	exon	chr14-58002980-58003695	32433
3110099E03Rik	chr2-115460578-115461078	0.0585527	0.20063	0.073	0.063	1	ENSMUST00000134580	ENSMUSG00000085582	lincRNA	exon	chr2-115493513-115496007	32434
3110099E03Rik	chr2-115513895-115514395	0.0685937	0.140508	0.134	0.118	1	ENSMUST00000143695	ENSMUSG00000085582	lincRNA	gap	chr2-115502612-115527702	0
3300005D01Rik	chr17-5805957-5806457	0.0102081	-0.492039	0.016	0.022	1	ENSMUST00000181484	ENSMUSG00000096965	lincRNA	exon	chr17-5802713-5803240	2716
3425401B19Rik	chr14-32681009-32681509	0.20259	0.254926	0.021	0.019	1	ENSMUST00000096038	ENSMUSG00000071540	protein_coding	gap	chr14-32668451-32685002	0
3425401B19Rik	chr14-32683167-32683667	0.00141219	-0.312694	0.066	0.075	1	ENSMUST00000096038	ENSMUSG00000071540	protein_coding	gap	chr14-32668451-32685002	0
3632451O06Rik	chr14-49785775-49786275	0.150362	0.297254	0.019	0.015	1	ENSMUST00000036972	ENSMUSG00000036242	protein_coding	exon	chr14-49783268-49783383	2391
3632451O06Rik	chr14-49723612-49724112	0.607274	0.126085	0.014	0.012	1	ENSMUST00000118129	ENSMUSG00000036242	protein_coding	gap	chr14-49689299-49751418	0
3632451O06Rik	chr14-49783156-49783656	0.217232	0.184485	0.04	0.035	1	ENSMUST00000118129	ENSMUSG00000036242	protein_coding	cds	chr14-49783268-49783276	0
3632454L22Rik	chrX-135087181-135087681	0.216757	0.360454	0.011	0.009	1	ENSMUST00000142907	ENSMUSG00000089759	processed_transcript	exon	chrX-135060070-135060336	26844
3830406C13Rik	chr14-12284594-12285094	0.332846	0.138723	0.046	0.041	1	ENSMUST00000163392	ENSMUSG00000033111	protein_coding	gap	chr14-12284258-12285384	0
3830406C13Rik	chr14-12300627-12301127	0.164004	0.279199	0.02	0.018	1	ENSMUST00000163392	ENSMUSG00000033111	protein_coding	gap	chr14-12297657-12301147	0
3830408C21Rik	chr13-107073305-107073805	0.00506474	-0.494383	0.021	0.027	1	ENSMUST00000095459	ENSMUSG00000071181	protein_coding	utr	chr13-107032604-107033673	39631
3830408C21Rik	chr13-107105468-107105968	0.0944848	0.446103	0.011	0.008	1	ENSMUST00000095459	ENSMUSG00000071181	protein_coding	utr	chr13-107032604-107033673	71794
3830408C21Rik	chr13-107111221-107111721	0.000343325	-0.405231	0.044	0.06	1	ENSMUST00000095459	ENSMUSG00000071181	protein_coding	utr	chr13-107032604-107033673	77547
3830432H09Rik	chr1-119533325-119533825	0.0416214	-0.278276	0.033	0.041	1	ENSMUST00000188909	ENSMUSG00000101731	lincRNA	gap	chr1-119531597-119534977	0
3930402G23Rik	chr8-10812239-10812739	0.0352014	-0.167774	0.099	0.106	1	ENSMUST00000040608	ENSMUSG00000038917	lincRNA	exon	chr8-10924427-10926995	111687
3930402G23Rik	chr8-10827509-10828009	0.539933	0.150321	0.014	0.014	1	ENSMUST00000040608	ENSMUSG00000038917	lincRNA	exon	chr8-10924427-10926995	96417
3930402G23Rik	chr8-10899564-10900064	0.0317396	-0.220512	0.059	0.066	1	ENSMUST00000040608	ENSMUSG00000038917	lincRNA	exon	chr8-10924427-10926995	24362
3930402G23Rik	chr8-10925154-10925654	0.21486	0.18274	0.041	0.037	1	ENSMUST00000040608	ENSMUSG00000038917	lincRNA	exon	chr8-10924427-10926995	0
3930402G23Rik	chr8-10926481-10926981	0.215845	0.191057	0.038	0.032	1	ENSMUST00000040608	ENSMUSG00000038917	lincRNA	exon	chr8-10924427-10926995	0
3930402G23Rik	chr8-10805642-10806142	0.474611	-0.139762	0.016	0.017	1	ENSMUST00000040608	ENSMUSG00000038917	lincRNA	exon	chr8-10924427-10926995	118284
3930402G23Rik	chr8-10870328-10870828	0.0388429	-0.440348	0.014	0.017	1	ENSMUST00000040608	ENSMUSG00000038917	lincRNA	exon	chr8-10924427-10926995	53598
3930402G23Rik	chr8-10833341-10833841	0.143947	0.308383	0.02	0.015	1	ENSMUST00000040608	ENSMUSG00000038917	lincRNA	exon	chr8-10924427-10926995	90585
3930402G23Rik	chr8-10857825-10858325	0.324818	-0.23498	0.011	0.013	1	ENSMUST00000040608	ENSMUSG00000038917	lincRNA	exon	chr8-10924427-10926995	66101
3930402G23Rik	chr8-10862909-10863409	0.0221854	-0.418208	0.018	0.024	1	ENSMUST00000040608	ENSMUSG00000038917	lincRNA	exon	chr8-10924427-10926995	61017
3930402G23Rik	chr8-10865335-10865835	0.0237724	0.328072	0.04	0.033	1	ENSMUST00000040608	ENSMUSG00000038917	lincRNA	exon	chr8-10924427-10926995	58591
3930402G23Rik	chr8-10935216-10935716	0.020309	0.561312	0.015	0.011	1	ENSMUST00000040608	ENSMUSG00000038917	lincRNA	exon	chr8-10928269-10928457	6758
3930402G23Rik	chr8-10945860-10946360	0.0456819	0.336662	0.032	0.025	1	ENSMUST00000040608	ENSMUSG00000038917	lincRNA	exon	chr8-10928269-10928457	17402
3930402G23Rik	chr8-10899003-10899503	0.0307502	-0.183165	0.084	0.096	1	ENSMUST00000040608	ENSMUSG00000038917	lincRNA	exon	chr8-10924427-10926995	24923
3930402G23Rik	chr8-10953623-10954123	0.489202	0.130985	0.025	0.022	1	ENSMUST00000040608	ENSMUSG00000038917	lincRNA	exon	chr8-10928269-10928457	25165
3930402G23Rik	chr8-10794500-10795000	0.404665	0.120182	0.045	0.041	1	ENSMUST00000040608	ENSMUSG00000038917	lincRNA	exon	chr8-10924427-10926995	129426
3930402G23Rik	chr8-10897447-10897947	0.112277	-0.127738	0.089	0.098	1	ENSMUST00000040608	ENSMUSG00000038917	lincRNA	exon	chr8-10924427-10926995	26479
4430402I18Rik	chr19-28909257-28909757	0.226263	-0.340222	0.008	0.01	1	ENSMUST00000179171	ENSMUSG00000064202	protein_coding	cds	chr19-28909431-28909565	0
4430402I18Rik	chr19-28963034-28963534	0.217771	-0.232069	0.019	0.02	1	ENSMUST00000175647	ENSMUSG00000064202	protein_coding	gap	chr19-28948744-28963535	0
4430402I18Rik	chr19-28963628-28964128	0.0474379	-0.18434	0.069	0.075	1	ENSMUST00000175647	ENSMUSG00000064202	protein_coding	cds	chr19-28963536-28963673	0
4430402I18Rik	chr19-28975271-28975771	0.00570259	0.296088	0.069	0.059	1	ENSMUST00000162110	ENSMUSG00000064202	protein_coding	exon	chr19-28967594-28967800	7470
4631405K08Rik	chr1-193503874-193504374	0.234594	-0.149558	0.034	0.039	1	ENSMUST00000180420	ENSMUSG00000097850	lincRNA	exon	chr1-193507238-193508899	2863
4631405K08Rik	chr1-193539251-193539751	0.578277	0.146138	0.013	0.012	1	ENSMUST00000180420	ENSMUSG00000097850	lincRNA	exon	chr1-193509725-193510174	29076
4631405K08Rik	chr1-193574843-193575343	0.181568	0.16882	0.054	0.047	1	ENSMUST00000180420	ENSMUSG00000097850	lincRNA	exon	chr1-193509725-193510174	64668
4631405K08Rik	chr1-193665755-193666255	0.0360544	-0.356636	0.022	0.027	1	ENSMUST00000180420	ENSMUSG00000097850	lincRNA	exon	chr1-193509725-193510174	155580
4631405K08Rik	chr1-193698830-193699330	0.438809	0.102809	0.049	0.044	1	ENSMUST00000180420	ENSMUSG00000097850	lincRNA	exon	chr1-193509725-193510174	188655
4631405K08Rik	chr1-193787410-193787910	0.0408383	-0.378915	0.018	0.022	1	ENSMUST00000180420	ENSMUSG00000097850	lincRNA	exon	chr1-193509725-193510174	277235
4632404H12Rik	chr3-89772511-89773011	0.130644	-0.112041	0.1	0.107	1	ENSMUST00000038450	ENSMUSG00000042579	protein_coding	cds	chr3-89772502-89772539	0
4632404H12Rik	chr3-89773114-89773614	8.75054e-05	-0.155537	0.291	0.314	1	ENSMUST00000038450	ENSMUSG00000042579	protein_coding	utr	chr3-89772540-89773240	0
4632415L05Rik	chr3-19828792-19829292	0.00166891	0.307261	0.088	0.075	1	ENSMUST00000059704	ENSMUSG00000048106	protein_coding	exon	chr3-19894886-19895962	65593
4632415L05Rik	chr3-19895389-19895889	0.225024	0.24702	0.022	0.018	1	ENSMUST00000059704	ENSMUSG00000048106	protein_coding	utr	chr3-19895351-19895962	0
4632415L05Rik	chr3-19904645-19905145	0.519637	-0.106429	0.021	0.024	1	ENSMUST00000059704	ENSMUSG00000048106	protein_coding	utr	chr3-19895351-19895962	8682
4632428C04Rik	chr16-30028024-30028524	0.423399	0.218601	0.013	0.01	1	ENSMUST00000181485	ENSMUSG00000097184	lincRNA	exon	chr16-30019152-30021430	6593
4632428N05Rik	chr10-60346606-60347106	0.0753824	-0.110747	0.138	0.142	1	ENSMUST00000170507	ENSMUSG00000020101	protein_coding	cds	chr10-60347022-60347103	0
4632428N05Rik	chr10-60347779-60348279	0.532615	-0.161761	0.009	0.01	1	ENSMUST00000170507	ENSMUSG00000020101	protein_coding	gap	chr10-60347104-60357841	0
4632428N05Rik	chr10-60351712-60352212	0.475622	0.136127	0.026	0.023	1	ENSMUST00000170507	ENSMUSG00000020101	protein_coding	gap	chr10-60347104-60357841	0
4632428N05Rik	chr10-60357394-60357894	0.261251	-0.153913	0.033	0.035	1	ENSMUST00000170507	ENSMUSG00000020101	protein_coding	cds	chr10-60357842-60358135	0
4632428N05Rik	chr10-60364169-60364669	0.078449	-0.433596	0.01	0.014	1	ENSMUST00000170507	ENSMUSG00000020101	protein_coding	cds	chr10-60364201-60364308	0
4632428N05Rik	chr10-60370044-60370544	0.114024	-0.12281	0.093	0.101	1	ENSMUST00000105460	ENSMUSG00000020101	protein_coding	utr	chr10-60368940-60372684	0
4632428N05Rik	chr10-60371562-60372062	0.589051	-0.107014	0.015	0.016	1	ENSMUST00000105460	ENSMUSG00000020101	protein_coding	utr	chr10-60368940-60372684	0
4731417B20Rik	chr5-136619566-136620066	0.511481	0.131784	0.023	0.02	1	ENSMUST00000053319	ENSMUSG00000046548	protein_coding	exon	chr5-136613702-136615328	4237
4731417B20Rik	chr5-136626857-136627357	0.00484704	0.342826	0.058	0.046	1	ENSMUST00000053319	ENSMUSG00000046548	protein_coding	exon	chr5-136613702-136615328	11528
4732419C18Rik	chr8-123747718-123748218	0.294405	-0.122077	0.043	0.047	1	ENSMUST00000181805	ENSMUSG00000097203	lincRNA	gap	chr8-123747994-123754057	0
4732465J04Rik	chr10-95715251-95715751	0.0993542	0.521698	0.01	0.007	1	ENSMUST00000187483	ENSMUSG00000101517	lincRNA	exon	chr10-95746077-95746232	30325
4732465J04Rik	chr10-95715966-95716466	0.449627	0.161553	0.02	0.017	1	ENSMUST00000187483	ENSMUSG00000101517	lincRNA	exon	chr10-95746077-95746232	29610
4732465J04Rik	chr10-95725312-95725812	0.155185	0.36876	0.013	0.011	1	ENSMUST00000187483	ENSMUSG00000101517	lincRNA	exon	chr10-95746077-95746232	20264
4732465J04Rik	chr10-95725835-95726335	0.00121865	0.270246	0.109	0.093	1	ENSMUST00000187483	ENSMUSG00000101517	lincRNA	exon	chr10-95746077-95746232	19741
4732487G21Rik	chr12-86326738-86327238	0.299186	-0.236176	0.012	0.013	1	ENSMUST00000181495	ENSMUSG00000097488	lincRNA	exon	chr12-86305721-86306006	20731
4833403I15Rik	chr18-46836760-46837260	0.571234	-0.122309	0.013	0.014	1	ENSMUST00000025358	ENSMUSG00000024481	protein_coding	exon	chr18-46850039-46850877	12778
4833403I15Rik	chr18-46849088-46849588	0.359085	0.248955	0.011	0.01	1	ENSMUST00000025358	ENSMUSG00000024481	protein_coding	exon	chr18-46850039-46850877	450
4833403I15Rik	chr18-46909072-46909572	0.377582	0.137693	0.036	0.03	1	ENSMUST00000025358	ENSMUSG00000024481	protein_coding	utr	chr18-46905357-46905446	3625
4833412C05Rik	chr7-67788674-67789174	0.368526	0.168343	0.025	0.021	1	ENSMUST00000181235	ENSMUSG00000097697	lincRNA	gap	chr7-67786595-67803364	0
[truncated: 65,754 more rows]

## Sheet: DA_Endothelial cells
gene_name	query_region	p_val	avg_log2FC	pct.1	pct.2	p_val_adj	tx_id	gene_id	gene_biotype	type	closest_region	distance
	chr7-29908224-29908724	0.0813644	0.446216	0.162	0.128	1	ENSMUST00000187028	ENSMUSG00000099689	protein_coding	cds	chr7-29908645-29908651	0
0610005C13Rik	chr7-45568038-45568538	4.57422e-05	0.481448	0.249	0.186	1	ENSMUST00000145208	ENSMUSG00000085214	processed_transcript	gap	chr7-45568380-45570985	0
0610007P14Rik	chr12-85816050-85816550	0.151949	0.365146	0.118	0.092	1	ENSMUST00000021676	ENSMUSG00000021252	protein_coding	cds	chr12-85816316-85816434	0
0610007P14Rik	chr12-85817415-85817915	0.573834	0.152801	0.022	0.018	1	ENSMUST00000131681	ENSMUSG00000021252	protein_coding	gap	chr12-85816435-85824470	0
0610007P14Rik	chr12-85818438-85818938	0.793768	0.231509	0.156	0.134	1	ENSMUST00000131681	ENSMUSG00000021252	protein_coding	gap	chr12-85816435-85824470	0
0610009E02Rik	chr2-26445651-26446151	0.0750313	0.346614	0.318	0.258	1	ENSMUST00000139144	ENSMUSG00000086714	processed_transcript	exon	chr2-26445942-26446200	0
0610009E02Rik	chr2-26449365-26449865	0.352547	0.15473	0.055	0.047	1	ENSMUST00000151521	ENSMUSG00000086714	processed_transcript	gap	chr2-26446201-26457672	0
0610009O20Rik	chr18-38250265-38250765	0.0149261	0.379501	0.282	0.222	1	ENSMUST00000025314	ENSMUSG00000024442	protein_coding	cds	chr18-38250369-38250399	0
0610009O20Rik	chr18-38252689-38253189	4.41032e-05	-0.258883	0.058	0.069	1	ENSMUST00000025314	ENSMUSG00000024442	protein_coding	cds	chr18-38252821-38252965	0
0610010F05Rik	chr11-23590055-23590555	0.00223749	-0.19764	0.036	0.04	1	ENSMUST00000180260	ENSMUSG00000042208	protein_coding	gap	chr11-23589984-23593425	0
0610010F05Rik	chr11-23633415-23633915	0.531017	0.20902	0.331	0.29	1	ENSMUST00000180260	ENSMUSG00000042208	protein_coding	utr	chr11-23633493-23633631	0
0610010K14Rik	chr11-70236690-70237190	0.00116128	-0.237876	0.033	0.034	1	ENSMUST00000134700	ENSMUSG00000020831	protein_coding	cds	chr11-70236877-70236904	0
0610010K14Rik	chr11-70237641-70238141	9.5119e-06	0.383364	0.411	0.327	1	ENSMUST00000108579	ENSMUSG00000020831	protein_coding	cds	chr11-70237784-70237804	0
0610011F06Rik	chr17-25875493-25875993	0.453052	0.362565	0.103	0.076	1	ENSMUST00000169308	ENSMUSG00000025731	protein_coding	cds	chr17-25875960-25876122	0
0610030E20Rik	chr6-72347526-72348026	0.000411249	0.691447	0.106	0.068	1	ENSMUST00000077783	ENSMUSG00000058706	protein_coding	cds	chr6-72347593-72347711	0
0610037L13Rik	chr4-107889919-107890419	0.0132848	0.439332	0.208	0.159	1	ENSMUST00000135454	ENSMUSG00000028608	protein_coding	cds	chr4-107890119-107890202	0
0610037L13Rik	chr4-107892585-107893085	0.00459663	-0.165631	0.032	0.035	1	ENSMUST00000153593	ENSMUSG00000028608	protein_coding	gap	chr4-107892254-107893333	0
0610040J01Rik	chr5-63812210-63812710	0.0140113	-0.429012	0.009	0.012	1	ENSMUST00000081747	ENSMUSG00000060512	protein_coding	utr	chr5-63812495-63812595	0
0610040J01Rik	chr5-63872055-63872555	0.0236915	-0.371203	0.012	0.015	1	ENSMUST00000081747	ENSMUSG00000060512	protein_coding	gap	chr5-63812596-63876449	0
0610040J01Rik	chr5-63874816-63875316	0.935182	0.222658	0.019	0.016	1	ENSMUST00000081747	ENSMUSG00000060512	protein_coding	gap	chr5-63812596-63876449	0
0610043K17Rik	chr4-101356664-101357164	0.00919526	0.581694	0.091	0.062	1	ENSMUST00000123107	ENSMUSG00000087361	lincRNA	gap	chr4-101353889-101366989	0
0610043K17Rik	chr4-101357291-101357791	0.673303	0.369732	0.073	0.056	1	ENSMUST00000123107	ENSMUSG00000087361	lincRNA	gap	chr4-101353889-101366989	0
0610043K17Rik	chr4-101357876-101358376	0.661651	0.392329	0.05	0.039	1	ENSMUST00000123107	ENSMUSG00000087361	lincRNA	gap	chr4-101353889-101366989	0
0610043K17Rik	chr4-101367215-101367715	0.623791	0.399144	0.028	0.02	1	ENSMUST00000142581	ENSMUSG00000087361	lincRNA	gap	chr4-101367140-101374257	0
0610043K17Rik	chr4-101384955-101385455	0.839992	0.171489	0.01	0.009	1	ENSMUST00000142581	ENSMUSG00000087361	lincRNA	gap	chr4-101374324-101390942	0
0610043K17Rik	chr4-101392182-101392682	0.0528311	-0.128309	0.016	0.017	1	ENSMUST00000123107	ENSMUSG00000087361	lincRNA	gap	chr4-101374324-101398889	0
1010001N08Rik	chr18-11049981-11050481	0.848514	0.337857	0.015	0.012	1	ENSMUST00000181316	ENSMUSG00000097222	lincRNA	gap	chr18-11050257-11050623	0
1110001J03Rik	chr6-38532994-38533494	0.358719	0.24439	0.165	0.143	1	ENSMUST00000147651	ENSMUSG00000019689	protein_coding	exon	chr6-38533502-38533711	7
1110001J03Rik	chr6-38533535-38534035	0.0517627	0.275449	0.449	0.384	1	ENSMUST00000147651	ENSMUSG00000019689	protein_coding	gap	chr6-38533712-38539158	0
1110001J03Rik	chr6-38531121-38531621	0.130314	0.14524	0.081	0.069	1	ENSMUST00000147651	ENSMUSG00000019689	protein_coding	exon	chr6-38533502-38533711	1880
1110001J03Rik	chr6-38534544-38535044	0.140829	0.36235	0.231	0.177	1	ENSMUST00000019833	ENSMUSG00000019689	protein_coding	cds	chr6-38534873-38535010	0
1110001J03Rik	chr6-38535215-38535715	0.0953837	0.451425	0.102	0.077	1	ENSMUST00000147651	ENSMUSG00000019689	protein_coding	gap	chr6-38533712-38539158	0
1110002J07Rik	chr10-66807533-66808033	0.879567	0.318474	0.026	0.021	1	ENSMUST00000181710	ENSMUSG00000097134	lincRNA	exon	chr10-66912489-66913672	104455
1110002J07Rik	chr10-66814459-66814959	0.598398	0.210176	0.051	0.042	1	ENSMUST00000181710	ENSMUSG00000097134	lincRNA	exon	chr10-66912489-66913672	97529
1110002J07Rik	chr10-66839041-66839541	0.0126817	-0.325189	0.017	0.021	1	ENSMUST00000181710	ENSMUSG00000097134	lincRNA	exon	chr10-66912489-66913672	72947
1110002J07Rik	chr10-66864991-66865491	0.0365331	-0.319146	0.011	0.011	1	ENSMUST00000181710	ENSMUSG00000097134	lincRNA	exon	chr10-66912489-66913672	46997
1110002J07Rik	chr10-66901857-66902357	0.0340533	-0.16458	0.022	0.026	1	ENSMUST00000181710	ENSMUSG00000097134	lincRNA	exon	chr10-66912489-66913672	10131
1110002J07Rik	chr10-66909140-66909640	0.00184526	0.774389	0.054	0.035	1	ENSMUST00000181710	ENSMUSG00000097134	lincRNA	exon	chr10-66912489-66913672	2848
1110002J07Rik	chr10-66911088-66911588	0.635521	0.251127	0.176	0.146	1	ENSMUST00000181710	ENSMUSG00000097134	lincRNA	exon	chr10-66912489-66913672	900
1110002J07Rik	chr10-66911592-66912092	0.0272675	0.381405	0.25	0.199	1	ENSMUST00000181710	ENSMUSG00000097134	lincRNA	exon	chr10-66912489-66913672	396
1110002J07Rik	chr10-66919658-66920158	0.674781	0.320285	0.067	0.051	1	ENSMUST00000181710	ENSMUSG00000097134	lincRNA	gap	chr10-66918996-66919927	0
1110002L01Rik	chr12-3425905-3426405	0.152357	0.5544	0.051	0.032	1	ENSMUST00000180149	ENSMUSG00000071456	protein_coding	gap	chr12-3407925-3426500	0
1110002L01Rik	chr12-3426546-3427046	0.000550574	0.368341	0.367	0.29	1	ENSMUST00000180149	ENSMUSG00000071456	protein_coding	cds	chr12-3426501-3426713	0
1110004E09Rik	chr16-90915957-90916457	0.0440698	0.142592	0.138	0.131	1	ENSMUST00000023694	ENSMUSG00000022972	protein_coding	utr	chr16-90925809-90925971	9351
1110004E09Rik	chr16-90925424-90925924	0.354505	0.160209	0.049	0.042	1	ENSMUST00000023694	ENSMUSG00000022972	protein_coding	utr	chr16-90925809-90925971	0
1110004E09Rik	chr16-90934114-90934614	0.38519	0.394809	0.083	0.064	1	ENSMUST00000149833	ENSMUSG00000022972	protein_coding	cds	chr16-90934582-90934720	0
1110004E09Rik	chr16-90934756-90935256	0.216258	0.317942	0.282	0.231	1	ENSMUST00000125519	ENSMUSG00000022972	protein_coding	utr	chr16-90934721-90934927	0
1110004F10Rik	chr7-116093023-116093523	0.527163	0.169803	0.451	0.409	1	ENSMUST00000151254	ENSMUSG00000030663	protein_coding	cds	chr7-116093463-116093525	0
1110004F10Rik	chr7-116093701-116094201	0.0799951	-0.122485	0.015	0.016	1	ENSMUST00000151254	ENSMUSG00000030663	protein_coding	gap	chr7-116093526-116099439	0
1110007C09Rik	chr13-49205385-49205885	1.96358e-07	0.93837	0.091	0.055	0.0736775	ENSMUST00000048946	ENSMUSG00000037960	protein_coding	gap	chr13-49205346-49208003	0
1110007C09Rik	chr13-49200644-49201144	0.000305014	1.7216	0.011	0.004	1	ENSMUST00000048946	ENSMUSG00000037960	protein_coding	utr	chr13-49202951-49203119	1806
1110007C09Rik	chr13-49211386-49211886	0.000801044	-0.700149	0.008	0.014	1	ENSMUST00000048946	ENSMUSG00000037960	protein_coding	gap	chr13-49208147-49215936	0
1110007C09Rik	chr13-49213529-49214029	0.000737665	0.456611	0.216	0.164	1	ENSMUST00000048946	ENSMUSG00000037960	protein_coding	gap	chr13-49208147-49215936	0
1110007C09Rik	chr13-49214352-49214852	0.70849	0.2369	0.029	0.024	1	ENSMUST00000048946	ENSMUSG00000037960	protein_coding	gap	chr13-49208147-49215936	0
1110007C09Rik	chr13-49215165-49215665	0.552292	0.356211	0.119	0.094	1	ENSMUST00000048946	ENSMUSG00000037960	protein_coding	gap	chr13-49208147-49215936	0
1110007C09Rik	chr13-49215872-49216372	0.4628	0.260584	0.371	0.32	1	ENSMUST00000048946	ENSMUSG00000037960	protein_coding	cds	chr13-49215937-49215943	0
1110008E08Rik	chr16-90625356-90625856	1.12624e-11	-0.281279	0.117	0.136	4.22588e-06	ENSMUST00000183621	ENSMUSG00000046119	lincRNA	exon	chr16-90554164-90554886	70469
1110008E08Rik	chr16-90626275-90626775	0.402776	0.136789	0.02	0.017	1	ENSMUST00000183621	ENSMUSG00000046119	lincRNA	exon	chr16-90554164-90554886	71388
1110008E08Rik	chr16-90635168-90635668	0.110629	-0.20397	0.009	0.01	1	ENSMUST00000183621	ENSMUSG00000046119	lincRNA	exon	chr16-90554164-90554886	80281
1110008F13Rik	chr2-156862802-156863302	0.00122973	0.423416	0.293	0.222	1	ENSMUST00000029165	ENSMUSG00000027637	protein_coding	utr	chr2-156863128-156863303	0
1110008F13Rik	chr2-156863756-156864256	0.021306	0.554285	0.072	0.052	1	ENSMUST00000152942	ENSMUSG00000027637	protein_coding	gap	chr2-156863418-156865256	0
1110008F13Rik	chr2-156864300-156864800	0.94227	0.298223	0.025	0.021	1	ENSMUST00000152942	ENSMUSG00000027637	protein_coding	gap	chr2-156863418-156865256	0
1110008F13Rik	chr2-156868943-156869443	0.0033791	-0.556353	0.008	0.011	1	ENSMUST00000152551	ENSMUSG00000027637	protein_coding	gap	chr2-156863418-156872337	0
1110008L16Rik	chr12-55344492-55344992	6.11721e-08	0.79284	0.13	0.083	0.022953	ENSMUST00000184980	ENSMUSG00000021023	protein_coding	gap	chr12-55338268-55377113	0
1110008L16Rik	chr12-55301792-55302292	0.756928	0.290611	0.015	0.013	1	ENSMUST00000184980	ENSMUSG00000021023	protein_coding	gap	chr12-55299667-55306338	0
1110008L16Rik	chr12-55302988-55303488	0.326883	0.397151	0.14	0.112	1	ENSMUST00000184766	ENSMUSG00000021023	protein_coding	utr	chr12-55303243-55303332	0
1110008L16Rik	chr12-55307536-55308036	0.762528	0.250802	0.016	0.013	1	ENSMUST00000184980	ENSMUSG00000021023	protein_coding	gap	chr12-55306387-55308736	0
1110008L16Rik	chr12-55315165-55315665	0.140793	0.495427	0.077	0.058	1	ENSMUST00000184980	ENSMUSG00000021023	protein_coding	gap	chr12-55308870-55338159	0
1110008L16Rik	chr12-55316677-55317177	0.619136	0.219369	0.04	0.035	1	ENSMUST00000184980	ENSMUSG00000021023	protein_coding	gap	chr12-55308870-55338159	0
1110008L16Rik	chr12-55321591-55322091	0.868518	0.279803	0.121	0.1	1	ENSMUST00000184980	ENSMUSG00000021023	protein_coding	gap	chr12-55308870-55338159	0
1110008L16Rik	chr12-55322139-55322639	0.1075	0.533512	0.056	0.038	1	ENSMUST00000184980	ENSMUSG00000021023	protein_coding	gap	chr12-55308870-55338159	0
1110008L16Rik	chr12-55343318-55343818	0.431011	0.494684	0.031	0.02	1	ENSMUST00000184980	ENSMUSG00000021023	protein_coding	gap	chr12-55338268-55377113	0
1110008L16Rik	chr12-55343945-55344445	1.89318e-05	1.06059	0.05	0.024	1	ENSMUST00000184980	ENSMUSG00000021023	protein_coding	gap	chr12-55338268-55377113	0
1110008L16Rik	chr12-55348906-55349406	0.782544	0.371187	0.03	0.025	1	ENSMUST00000184980	ENSMUSG00000021023	protein_coding	gap	chr12-55338268-55377113	0
1110008L16Rik	chr12-55353434-55353934	0.011769	1.04291	0.019	0.009	1	ENSMUST00000184980	ENSMUSG00000021023	protein_coding	gap	chr12-55338268-55377113	0
1110008L16Rik	chr12-55354869-55355369	0.928035	0.246133	0.066	0.052	1	ENSMUST00000184980	ENSMUSG00000021023	protein_coding	gap	chr12-55338268-55377113	0
1110008L16Rik	chr12-55357294-55357794	0.169911	0.589676	0.031	0.019	1	ENSMUST00000184980	ENSMUSG00000021023	protein_coding	gap	chr12-55338268-55377113	0
1110008L16Rik	chr12-55365137-55365637	0.000611537	-0.841074	0.006	0.011	1	ENSMUST00000184980	ENSMUSG00000021023	protein_coding	gap	chr12-55338268-55377113	0
1110008L16Rik	chr12-55376863-55377363	0.76903	0.245634	0.205	0.178	1	ENSMUST00000184980	ENSMUSG00000021023	protein_coding	cds	chr12-55377114-55377262	0
1110008L16Rik	chr12-55377484-55377984	0.132336	0.487414	0.049	0.037	1	ENSMUST00000184980	ENSMUSG00000021023	protein_coding	gap	chr12-55377263-55379281	0
1110008P14Rik	chr2-32380484-32380984	0.868977	0.285947	0.01	0.009	1	ENSMUST00000146423	ENSMUSG00000039195	protein_coding	gap	chr2-32379534-32381681	0
1110012L19Rik	chrX-70385074-70385574	0.0882992	0.102054	0.098	0.084	1	ENSMUST00000053981	ENSMUSG00000045237	protein_coding	exon	chrX-70385877-70386151	302
1110012L19Rik	chrX-70385585-70386085	0.0943201	0.40179	0.156	0.116	1	ENSMUST00000053981	ENSMUSG00000045237	protein_coding	utr	chrX-70385877-70386151	0
1110017D15Rik	chr4-41506126-41506626	0.0544016	0.795987	0.021	0.011	1	ENSMUST00000125303	ENSMUSG00000028441	protein_coding	gap	chr4-41505655-41507093	0
1110017D15Rik	chr4-41506828-41507328	0.32432	0.37722	0.09	0.068	1	ENSMUST00000125303	ENSMUSG00000028441	protein_coding	cds	chr4-41507094-41507328	0
1110018N20Rik	chr2-167188803-167189303	0.00105114	-0.140247	0.044	0.046	1	ENSMUST00000151217	ENSMUSG00000085151	processed_transcript	gap	chr2-167188819-167189277	0
1110018N20Rik	chr2-167189337-167189837	0.113744	-0.13178	0.01	0.01	1	ENSMUST00000151217	ENSMUSG00000085151	processed_transcript	gap	chr2-167189407-167191291	0
1110018N20Rik	chr2-167189932-167190432	0.906581	0.282149	0.026	0.022	1	ENSMUST00000151217	ENSMUSG00000085151	processed_transcript	gap	chr2-167189407-167191291	0
1110020A21Rik	chr17-84877777-84878277	0.179101	0.406629	0.111	0.083	1	ENSMUST00000181147	ENSMUSG00000097047	lincRNA	exon	chr17-84954967-84955308	76689
1110020A21Rik	chr17-84890900-84891400	7.62399e-05	-0.584084	0.016	0.024	1	ENSMUST00000181147	ENSMUSG00000097047	lincRNA	exon	chr17-84954967-84955308	63566
1110032A03Rik	chr9-50763270-50763770	0.0585832	0.919696	0.011	0.006	1	ENSMUST00000177546	ENSMUSG00000037971	protein_coding	utr	chr9-50763701-50763855	0
1110032A03Rik	chr9-50767679-50768179	0.705745	0.356454	0.128	0.097	1	ENSMUST00000177546	ENSMUSG00000037971	protein_coding	cds	chr9-50767858-50767899	0
1110034G24Rik	chr2-132754920-132755420	3.89088e-34	1.68703	0.114	0.038	1.45994e-28	ENSMUST00000110132	ENSMUSG00000044991	protein_coding	utr	chr2-132750656-132751055	3864
1110034G24Rik	chr2-132721151-132721651	3.40875e-08	0.661386	0.183	0.121	0.0127903	ENSMUST00000148271	ENSMUSG00000044991	protein_coding	gap	chr2-132692132-132750212	0
1110034G24Rik	chr2-132675303-132675803	0.843605	0.381783	0.017	0.012	1	ENSMUST00000061891	ENSMUSG00000044991	protein_coding	exon	chr2-132686931-132686981	11127
1110034G24Rik	chr2-132680441-132680941	0.629873	0.429057	0.024	0.02	1	ENSMUST00000061891	ENSMUSG00000044991	protein_coding	exon	chr2-132686931-132686981	5989
1110034G24Rik	chr2-132681052-132681552	3.79419e-05	0.616458	0.127	0.087	1	ENSMUST00000061891	ENSMUSG00000044991	protein_coding	exon	chr2-132686931-132686981	5378
1110034G24Rik	chr2-132684427-132684927	0.914709	0.292826	0.023	0.021	1	ENSMUST00000061891	ENSMUSG00000044991	protein_coding	exon	chr2-132686931-132686981	2003
1110034G24Rik	chr2-132686230-132686730	0.00302521	0.946346	0.029	0.017	1	ENSMUST00000061891	ENSMUSG00000044991	protein_coding	exon	chr2-132686931-132686981	200
1110034G24Rik	chr2-132686791-132687291	0.922668	0.271482	0.23	0.191	1	ENSMUST00000061891	ENSMUSG00000044991	protein_coding	utr	chr2-132686931-132686981	0
1110034G24Rik	chr2-132688565-132689065	0.950006	0.226999	0.018	0.016	1	ENSMUST00000061891	ENSMUSG00000044991	protein_coding	gap	chr2-132686982-132691949	0
1110034G24Rik	chr2-132689606-132690106	0.237353	0.159479	0.115	0.099	1	ENSMUST00000061891	ENSMUSG00000044991	protein_coding	gap	chr2-132686982-132691949	0
1110034G24Rik	chr2-132691102-132691602	0.963804	0.285085	0.032	0.026	1	ENSMUST00000148271	ENSMUSG00000044991	protein_coding	gap	chr2-132690229-132691949	0
1110034G24Rik	chr2-132692327-132692827	0.114335	0.316525	0.256	0.213	1	ENSMUST00000148271	ENSMUSG00000044991	protein_coding	gap	chr2-132692132-132750212	0
1110034G24Rik	chr2-132692934-132693434	0.799496	0.232653	0.036	0.031	1	ENSMUST00000148271	ENSMUSG00000044991	protein_coding	gap	chr2-132692132-132750212	0
1110034G24Rik	chr2-132694818-132695318	0.257485	0.606372	0.018	0.012	1	ENSMUST00000148271	ENSMUSG00000044991	protein_coding	gap	chr2-132692132-132750212	0
1110034G24Rik	chr2-132695650-132696150	0.205294	0.362466	0.171	0.135	1	ENSMUST00000148271	ENSMUSG00000044991	protein_coding	gap	chr2-132692132-132750212	0
1110034G24Rik	chr2-132696789-132697289	0.237088	0.189395	0.336	0.299	1	ENSMUST00000148271	ENSMUSG00000044991	protein_coding	gap	chr2-132692132-132750212	0
1110034G24Rik	chr2-132697697-132698197	0.695617	0.245609	0.11	0.088	1	ENSMUST00000148271	ENSMUSG00000044991	protein_coding	gap	chr2-132692132-132750212	0
1110034G24Rik	chr2-132698355-132698855	0.350577	0.177281	0.188	0.17	1	ENSMUST00000148271	ENSMUSG00000044991	protein_coding	gap	chr2-132692132-132750212	0
1110034G24Rik	chr2-132699826-132700326	0.809749	0.217758	0.023	0.02	1	ENSMUST00000148271	ENSMUSG00000044991	protein_coding	gap	chr2-132692132-132750212	0
1110034G24Rik	chr2-132701354-132701854	0.531609	0.316235	0.112	0.091	1	ENSMUST00000148271	ENSMUSG00000044991	protein_coding	gap	chr2-132692132-132750212	0
1110034G24Rik	chr2-132705229-132705729	0.270927	0.113963	0.024	0.021	1	ENSMUST00000148271	ENSMUSG00000044991	protein_coding	gap	chr2-132692132-132750212	0
1110034G24Rik	chr2-132705815-132706315	0.605329	0.188411	0.011	0.01	1	ENSMUST00000148271	ENSMUSG00000044991	protein_coding	gap	chr2-132692132-132750212	0
1110034G24Rik	chr2-132715289-132715789	0.0399226	0.385369	0.182	0.142	1	ENSMUST00000148271	ENSMUSG00000044991	protein_coding	gap	chr2-132692132-132750212	0
1110034G24Rik	chr2-132716103-132716603	0.14535	0.374728	0.137	0.106	1	ENSMUST00000148271	ENSMUSG00000044991	protein_coding	gap	chr2-132692132-132750212	0
1110034G24Rik	chr2-132721752-132722252	0.155919	0.523488	0.038	0.025	1	ENSMUST00000148271	ENSMUSG00000044991	protein_coding	gap	chr2-132692132-132750212	0
1110034G24Rik	chr2-132738385-132738885	0.0546841	-0.237518	0.012	0.014	1	ENSMUST00000148271	ENSMUSG00000044991	protein_coding	gap	chr2-132692132-132750212	0
1110034G24Rik	chr2-132751378-132751878	0.0386613	1.01628	0.012	0.006	1	ENSMUST00000110132	ENSMUSG00000044991	protein_coding	utr	chr2-132750656-132751055	322
1110036E04Rik	chr9-64050474-64050974	1.56524e-11	1.02064	0.115	0.064	5.8731e-06	ENSMUST00000181151	ENSMUSG00000097036	lincRNA	gap	chr9-64049896-64053188	0
1110036E04Rik	chr9-64066630-64067130	0.233523	0.168843	0.119	0.107	1	ENSMUST00000181151	ENSMUSG00000097036	lincRNA	exon	chr9-64053497-64054100	12529
1110036E04Rik	chr9-64060191-64060691	0.112413	0.43125	0.09	0.068	1	ENSMUST00000181151	ENSMUSG00000097036	lincRNA	exon	chr9-64053497-64054100	6090
1110036E04Rik	chr9-64058177-64058677	0.0069058	-0.287108	0.014	0.019	1	ENSMUST00000181151	ENSMUSG00000097036	lincRNA	exon	chr9-64053497-64054100	4076
1110036E04Rik	chr9-64055160-64055660	0.664431	0.22069	0.135	0.116	1	ENSMUST00000181151	ENSMUSG00000097036	lincRNA	exon	chr9-64053497-64054100	1059
1110036E04Rik	chr9-64049271-64049771	0.252338	0.209137	0.108	0.09	1	ENSMUST00000181151	ENSMUSG00000097036	lincRNA	exon	chr9-64049829-64049895	57
1110036E04Rik	chr9-64049967-64050467	0.00642157	0.334284	0.37	0.307	1	ENSMUST00000181151	ENSMUSG00000097036	lincRNA	gap	chr9-64049896-64053188	0
1110037F02Rik	chr4-11541099-11541599	1.36201e-07	-0.597453	0.03	0.042	0.0511055	ENSMUST00000108307	ENSMUSG00000040720	protein_coding	gap	chr4-11540642-11542106	0
1110037F02Rik	chr4-11485649-11486149	0.0631077	0.308979	0.368	0.306	1	ENSMUST00000108307	ENSMUSG00000040720	protein_coding	cds	chr4-11486043-11486105	0
1110037F02Rik	chr4-11485037-11485537	0.586466	0.191616	0.021	0.017	1	ENSMUST00000055372	ENSMUSG00000040720	protein_coding	exon	chr4-11485958-11486105	420
1110037F02Rik	chr4-11535759-11536259	2.86286e-05	0.982555	0.042	0.023	1	ENSMUST00000108307	ENSMUSG00000040720	protein_coding	gap	chr4-11534322-11539909	0
1110037F02Rik	chr4-11545787-11546287	0.980274	0.318108	0.011	0.009	1	ENSMUST00000108307	ENSMUSG00000040720	protein_coding	cds	chr4-11545969-11546300	0
1110037F02Rik	chr4-11550084-11550584	0.307274	0.115974	0.037	0.034	1	ENSMUST00000108307	ENSMUSG00000040720	protein_coding	utr	chr4-11549700-11550684	0
1110038B12Rik	chr17-34943340-34943840	0.365226	0.590018	0.012	0.009	1	ENSMUST00000174464	ENSMUSG00000092203	processed_transcript	exon	chr17-34950238-34950475	6397
1110038B12Rik	chr17-34947548-34948048	0.0688677	0.650148	0.028	0.019	1	ENSMUST00000174464	ENSMUSG00000092203	processed_transcript	exon	chr17-34950238-34950475	2189
1110038B12Rik	chr17-34950988-34951488	0.032254	1.07933	0.016	0.008	1	ENSMUST00000174714	ENSMUSG00000092203	processed_transcript	gap	chr17-34950848-34952135	0
1110038B12Rik	chr17-34951524-34952024	0.466524	0.586545	0.021	0.015	1	ENSMUST00000174714	ENSMUSG00000092203	processed_transcript	gap	chr17-34950848-34952135	0
1110038B12Rik	chr17-34952226-34952726	0.00918818	0.559911	0.135	0.097	1	ENSMUST00000174714	ENSMUSG00000092203	processed_transcript	gap	chr17-34952174-34952351	0
1110038B12Rik	chr17-34952944-34953444	0.00953812	0.597269	0.103	0.068	1	ENSMUST00000173070	ENSMUSG00000092203	processed_transcript	exon	chr17-34952352-34952471	472
1110038B12Rik	chr17-34953549-34954049	0.000145598	1.33632	0.025	0.011	1	ENSMUST00000173070	ENSMUSG00000092203	processed_transcript	exon	chr17-34952352-34952471	1077
1110038F14Rik	chr15-76948205-76948705	0.000262357	0.651547	0.117	0.077	1	ENSMUST00000071792	ENSMUSG00000063236	protein_coding	cds	chr15-76948629-76948919	0
1110038F14Rik	chr15-76973651-76974151	0.846378	0.290326	0.06	0.05	1	ENSMUST00000071792	ENSMUSG00000063236	protein_coding	utr	chr15-76950389-76950729	22921
1110051M20Rik	chr2-91360867-91361367	2.78755e-10	-0.52236	0.05	0.067	0.000104594	ENSMUST00000145573	ENSMUSG00000040591	protein_coding	gap	chr2-91304834-91383728	0
1110051M20Rik	chr2-91291249-91291749	0.0216797	-0.265954	0.017	0.022	1	ENSMUST00000102594	ENSMUSG00000040591	protein_coding	gap	chr2-91284321-91304748	0
1110051M20Rik	chr2-91335077-91335577	0.0156876	-0.437354	0.009	0.012	1	ENSMUST00000145573	ENSMUSG00000040591	protein_coding	gap	chr2-91304834-91383728	0
1110051M20Rik	chr2-91348985-91349485	0.00124852	-0.667251	0.009	0.014	1	ENSMUST00000145573	ENSMUSG00000040591	protein_coding	gap	chr2-91304834-91383728	0
1110051M20Rik	chr2-91412269-91412769	0.868911	0.367778	0.012	0.01	1	ENSMUST00000145573	ENSMUSG00000040591	protein_coding	gap	chr2-91383860-91421865	0
1110051M20Rik	chr2-91444447-91444947	0.460514	0.200118	0.079	0.067	1	ENSMUST00000102594	ENSMUSG00000040591	protein_coding	cds	chr2-91444569-91444614	0
1110054M08Rik	chr16-24282185-24282685	5.17237e-15	-0.455063	0.076	0.102	1.94078e-09	ENSMUST00000181640	ENSMUSG00000097867	lincRNA	exon	chr16-24391612-24393107	108926
1110054M08Rik	chr16-24234719-24235219	0.000456259	-0.472729	0.017	0.026	1	ENSMUST00000181640	ENSMUSG00000097867	lincRNA	exon	chr16-24391612-24393107	156392
1110054M08Rik	chr16-24392742-24393242	0.000495547	0.568962	0.147	0.103	1	ENSMUST00000181640	ENSMUSG00000097867	lincRNA	gap	chr16-24393108-24393481	0
1110057K04Rik	chr12-8207898-8208398	0.955672	0.271466	0.098	0.083	1	ENSMUST00000169104	ENSMUSG00000037669	protein_coding	utr	chr12-8208127-8208204	0
1110057K04Rik	chr12-8232637-8233137	0.0165834	-0.505466	0.007	0.01	1	ENSMUST00000169104	ENSMUSG00000037669	protein_coding	gap	chr12-8227364-8238442	0
1110058L19Rik	chr1-23959326-23959826	0.0246971	-0.470085	0.007	0.011	1	ENSMUST00000027338	ENSMUSG00000026154	protein_coding	utr	chr1-23995939-23996250	36112
1110058L19Rik	chr1-24005462-24005962	0.613855	0.334953	0.14	0.109	1	ENSMUST00000027338	ENSMUSG00000026154	protein_coding	cds	chr1-24005546-24005600	0
1110059E24Rik	chr19-21571128-21571628	0.272755	0.113615	0.038	0.034	1	ENSMUST00000177577	ENSMUSG00000035171	protein_coding	utr	chr19-21581202-21581630	9573
1110059E24Rik	chr19-21620544-21621044	0.888258	0.27201	0.012	0.01	1	ENSMUST00000180304	ENSMUSG00000035171	protein_coding	gap	chr19-21619216-21630509	0
1110059E24Rik	chr19-21629464-21629964	0.436274	0.418245	0.026	0.019	1	ENSMUST00000180304	ENSMUSG00000035171	protein_coding	gap	chr19-21619216-21630509	0
1110059E24Rik	chr19-21643888-21644388	0.0678669	0.85361	0.015	0.009	1	ENSMUST00000180304	ENSMUSG00000035171	protein_coding	gap	chr19-21630797-21652606	0
1110059E24Rik	chr19-21647243-21647743	0.253919	0.704131	0.01	0.007	1	ENSMUST00000180304	ENSMUSG00000035171	protein_coding	gap	chr19-21630797-21652606	0
1110059E24Rik	chr19-21652301-21652801	0.691194	0.325658	0.122	0.099	1	ENSMUST00000180304	ENSMUSG00000035171	protein_coding	cds	chr19-21652607-21652610	0
1110059E24Rik	chr19-21652895-21653395	0.00417569	0.306167	0.42	0.354	1	ENSMUST00000179768	ENSMUSG00000035171	protein_coding	utr	chr19-21652709-21652917	0
1110059G10Rik	chr9-122950753-122951253	0.231888	0.400788	0.149	0.114	1	ENSMUST00000118422	ENSMUSG00000032551	protein_coding	cds	chr9-122950805-122950912	0
1110065P20Rik	chr4-124849495-124849995	0.0197152	-0.210796	0.018	0.018	1	ENSMUST00000185036	ENSMUSG00000078570	protein_coding	cds	chr4-124849867-124849962	0
1110065P20Rik	chr4-124850447-124850947	0.00812448	0.439059	0.245	0.185	1	ENSMUST00000185036	ENSMUSG00000078570	protein_coding	cds	chr4-124850649-124850827	0
1190002F15Rik	chr6-134927183-134927683	0.00988522	0.667637	0.062	0.04	1	ENSMUST00000183867	ENSMUSG00000098318	lincRNA	exon	chr6-134929092-134929260	1408
1190002F15Rik	chr6-134927855-134928355	0.040944	0.602547	0.062	0.043	1	ENSMUST00000183867	ENSMUSG00000098318	lincRNA	exon	chr6-134929092-134929260	736
1190002F15Rik	chr6-134928528-134929028	5.52056e-05	0.469954	0.272	0.199	1	ENSMUST00000183867	ENSMUSG00000098318	lincRNA	exon	chr6-134929092-134929260	63
1190002F15Rik	chr6-134932736-134933236	0.694264	0.469238	0.014	0.011	1	ENSMUST00000185152	ENSMUSG00000098318	lincRNA	gap	chr6-134929261-134943639	0
1190002F15Rik	chr6-134947302-134947802	0.938885	0.340396	0.041	0.031	1	ENSMUST00000185152	ENSMUSG00000098318	lincRNA	gap	chr6-134943738-134951305	0
1190002N15Rik	chr9-94536961-94537461	0.873776	0.298154	0.068	0.055	1	ENSMUST00000113028	ENSMUSG00000045414	protein_coding	cds	chr9-94537219-94537875	0
1190002N15Rik	chr9-94538309-94538809	0.98811	0.203697	0.456	0.399	1	ENSMUST00000113028	ENSMUSG00000045414	protein_coding	exon	chr9-94537219-94538081	227
1190005I06Rik	chr8-120633644-120634144	0.380822	0.599668	0.01	0.006	1	ENSMUST00000144417	ENSMUSG00000043687	protein_coding	utr	chr8-120634142-120634198	0
1190007I07Rik	chr10-82622541-82623041	0.875068	0.319551	0.055	0.045	1	ENSMUST00000185168	ENSMUSG00000063320	protein_coding	cds	chr10-82622708-82622815	0
1190007I07Rik	chr10-82623108-82623608	0.0336397	0.329208	0.317	0.257	1	ENSMUST00000185168	ENSMUSG00000063320	protein_coding	utr	chr10-82623153-82623228	0
1200007C13Rik	chr2-167834111-167834611	0.0247877	1.09586	0.014	0.007	1	ENSMUST00000143649	ENSMUSG00000087684	lincRNA	exon	chr2-167832931-167833646	464
1200007C13Rik	chr2-167815059-167815559	0.805959	0.348174	0.026	0.02	1	ENSMUST00000143649	ENSMUSG00000087684	lincRNA	exon	chr2-167827693-167829431	12133
1200007C13Rik	chr2-167823422-167823922	0.901683	0.300354	0.044	0.036	1	ENSMUST00000143649	ENSMUSG00000087684	lincRNA	exon	chr2-167827693-167829431	3770
1200007C13Rik	chr2-167833586-167834086	0.332116	0.525743	0.043	0.029	1	ENSMUST00000143649	ENSMUSG00000087684	lincRNA	exon	chr2-167832931-167833646	0
1200007C13Rik	chr2-167834803-167835303	0.446424	0.597221	0.012	0.009	1	ENSMUST00000143649	ENSMUSG00000087684	lincRNA	exon	chr2-167832931-167833646	1156
1200014J11Rik	chr11-73047013-73047513	0.167878	0.584481	0.037	0.024	1	ENSMUST00000021135	ENSMUSG00000020783	protein_coding	exon	chr11-73047783-73048082	269
1200014J11Rik	chr11-73047521-73048021	0.015664	0.372623	0.281	0.224	1	ENSMUST00000021135	ENSMUSG00000020783	protein_coding	cds	chr11-73047900-73048082	0
1200014J11Rik	chr11-73048227-73048727	0.084852	0.673509	0.045	0.026	1	ENSMUST00000151823	ENSMUSG00000020783	protein_coding	gap	chr11-73048083-73049858	0
1200014J11Rik	chr11-73054235-73054735	0.6724	0.164559	0.045	0.043	1	ENSMUST00000144262	ENSMUSG00000020783	protein_coding	gap	chr11-73053529-73056604	0
1300002E11Rik	chr16-21794138-21794638	0.0704651	0.390633	0.21	0.167	1	ENSMUST00000181960	ENSMUSG00000097290	lincRNA	gap	chr16-21794447-21795849	0
1300002E11Rik	chr16-21814925-21815425	0.97912	0.301979	0.063	0.051	1	ENSMUST00000181960	ENSMUSG00000097290	lincRNA	exon	chr16-21808678-21809037	5887
1300002E11Rik	chr16-21818064-21818564	0.314295	0.478093	0.028	0.021	1	ENSMUST00000181960	ENSMUSG00000097290	lincRNA	exon	chr16-21808678-21809037	9026
1300002E11Rik	chr16-21818591-21819091	0.0183152	0.992979	0.019	0.011	1	ENSMUST00000181960	ENSMUSG00000097290	lincRNA	exon	chr16-21808678-21809037	9553
1500002C15Rik	chr4-155733596-155734096	0.8504	0.250922	0.01	0.008	1	ENSMUST00000178987	ENSMUSG00000096221	protein_coding	cds	chr4-155733864-155734250	0
1500002C15Rik	chr4-155734498-155734998	0.0683004	0.416088	0.158	0.124	1	ENSMUST00000178987	ENSMUSG00000096221	protein_coding	utr	chr4-155734251-155734727	0
1500009C09Rik	chr15-82259455-82259955	0.234768	0.712198	0.013	0.008	1	ENSMUST00000143238	ENSMUSG00000068099	protein_coding	cds	chr15-82259579-82259785	0
1500009C09Rik	chr15-82266315-82266815	0.457969	0.1908	0.023	0.02	1	ENSMUST00000143238	ENSMUSG00000068099	protein_coding	utr	chr15-82259786-82260753	5561
1500009L16Rik	chr10-83871659-83872159	1.9224e-13	-0.113216	0.284	0.303	7.21322e-08	ENSMUST00000150459	ENSMUSG00000087651	protein_coding	utr	chr10-83761918-83762761	108897
1500009L16Rik	chr10-83995869-83996369	1.98553e-13	-0.740869	0.038	0.061	7.45012e-08	ENSMUST00000150459	ENSMUSG00000087651	protein_coding	utr	chr10-83761918-83762761	233107
1500009L16Rik	chr10-83937155-83937655	3.11674e-08	-0.314105	0.055	0.068	0.0116946	ENSMUST00000150459	ENSMUSG00000087651	protein_coding	utr	chr10-83761918-83762761	174393
1500009L16Rik	chr10-84060562-84061062	1.25068e-07	-0.381327	0.054	0.067	0.046928	ENSMUST00000150459	ENSMUSG00000087651	protein_coding	utr	chr10-83761918-83762761	297800
1500009L16Rik	chr10-83805317-83805817	4.38041e-07	-0.622887	0.019	0.031	0.164362	ENSMUST00000150459	ENSMUSG00000087651	protein_coding	utr	chr10-83761918-83762761	42555
1500009L16Rik	chr10-83931623-83932123	9.56315e-07	-0.860065	0.013	0.023	0.358828	ENSMUST00000150459	ENSMUSG00000087651	protein_coding	utr	chr10-83761918-83762761	168861
1500009L16Rik	chr10-83722624-83723124	0.00561403	-0.477128	0.009	0.011	1	ENSMUST00000150459	ENSMUSG00000087651	protein_coding	cds	chr10-83722989-83723034	0
1500009L16Rik	chr10-83819593-83820093	0.611057	0.356138	0.07	0.056	1	ENSMUST00000150459	ENSMUSG00000087651	protein_coding	utr	chr10-83761918-83762761	56831
1500009L16Rik	chr10-83836343-83836843	0.670481	0.437429	0.012	0.009	1	ENSMUST00000150459	ENSMUSG00000087651	protein_coding	utr	chr10-83761918-83762761	73581
1500009L16Rik	chr10-83857141-83857641	0.0065835	-0.47372	0.01	0.013	1	ENSMUST00000150459	ENSMUSG00000087651	protein_coding	utr	chr10-83761918-83762761	94379
1500009L16Rik	chr10-83857992-83858492	5.61672e-05	0.538625	0.178	0.129	1	ENSMUST00000150459	ENSMUSG00000087651	protein_coding	utr	chr10-83761918-83762761	95230
1500009L16Rik	chr10-83858653-83859153	0.772375	0.344567	0.038	0.03	1	ENSMUST00000150459	ENSMUSG00000087651	protein_coding	utr	chr10-83761918-83762761	95891
1500009L16Rik	chr10-83859569-83860069	0.000288272	0.533639	0.175	0.13	1	ENSMUST00000150459	ENSMUSG00000087651	protein_coding	utr	chr10-83761918-83762761	96807
1500009L16Rik	chr10-83861864-83862364	0.000725835	-0.332994	0.024	0.027	1	ENSMUST00000150459	ENSMUSG00000087651	protein_coding	utr	chr10-83761918-83762761	99102
1500009L16Rik	chr10-83864562-83865062	1.1391e-05	-0.296675	0.05	0.061	1	ENSMUST00000150459	ENSMUSG00000087651	protein_coding	utr	chr10-83761918-83762761	101800
1500009L16Rik	chr10-83865849-83866349	0.000368437	-0.160974	0.049	0.055	1	ENSMUST00000150459	ENSMUSG00000087651	protein_coding	utr	chr10-83761918-83762761	103087
1500009L16Rik	chr10-83897510-83898010	0.0278008	-0.168222	0.016	0.016	1	ENSMUST00000150459	ENSMUSG00000087651	protein_coding	utr	chr10-83761918-83762761	134748
1500009L16Rik	chr10-83916059-83916559	0.00502838	-0.630104	0.008	0.011	1	ENSMUST00000150459	ENSMUSG00000087651	protein_coding	utr	chr10-83761918-83762761	153297
1500009L16Rik	chr10-83934386-83934886	0.404759	0.106004	0.011	0.01	1	ENSMUST00000150459	ENSMUSG00000087651	protein_coding	utr	chr10-83761918-83762761	171624
1500009L16Rik	chr10-83970426-83970926	0.00822852	-0.323552	0.013	0.017	1	ENSMUST00000150459	ENSMUSG00000087651	protein_coding	utr	chr10-83761918-83762761	207664
1500009L16Rik	chr10-84019347-84019847	0.102679	0.572347	0.039	0.029	1	ENSMUST00000150459	ENSMUSG00000087651	protein_coding	utr	chr10-83761918-83762761	256585
1500009L16Rik	chr10-84054855-84055355	0.621761	0.109948	0.013	0.012	1	ENSMUST00000150459	ENSMUSG00000087651	protein_coding	utr	chr10-83761918-83762761	292093
1500009L16Rik	chr10-84055808-84056308	0.0456699	0.368229	0.173	0.133	1	ENSMUST00000150459	ENSMUSG00000087651	protein_coding	utr	chr10-83761918-83762761	293046
1500009L16Rik	chr10-84056439-84056939	0.566239	0.355708	0.055	0.041	1	ENSMUST00000150459	ENSMUSG00000087651	protein_coding	utr	chr10-83761918-83762761	293677
1500011B03Rik	chr5-114813696-114814196	0.298121	0.343182	0.178	0.141	1	ENSMUST00000112160	ENSMUSG00000072694	protein_coding	cds	chr5-114813780-114813912	0
1500011K16Rik	chr2-127792255-127792755	0.582845	0.321362	0.128	0.103	1	ENSMUST00000135091	ENSMUSG00000051319	protein_coding	cds	chr2-127792297-127792467	0
1500012F01Rik	chr2-167071616-167072116	0.00441238	0.447473	0.23	0.168	1	ENSMUST00000189909	ENSMUSG00000074578	protein_coding	exon	chr2-167065687-167065862	5753
1500012F01Rik	chr2-167063460-167063960	0.0447582	-0.11135	0.016	0.016	1	ENSMUST00000125674	ENSMUSG00000074578	protein_coding	utr	chr2-167063636-167063727	0
1500012K07Rik	chr7-75366465-75366965	0.0134688	-0.149327	0.025	0.026	1	ENSMUST00000181846	ENSMUSG00000097247	lincRNA	exon	chr7-75329405-75331419	35045
1500012K07Rik	chr7-75370834-75371334	0.0327795	-0.126671	0.023	0.025	1	ENSMUST00000181846	ENSMUSG00000097247	lincRNA	exon	chr7-75329405-75331419	39414
1500015L24Rik	chr19-20434473-20434973	0.0141035	-0.32681	0.011	0.013	1	ENSMUST00000179640	ENSMUSG00000094732	lincRNA	exon	chr19-20422259-20422787	11685
1500017E21Rik	chr19-36677123-36677623	0.00134701	-0.720082	0.008	0.013	1	ENSMUST00000149601	ENSMUSG00000087579	processed_transcript	gap	chr19-36658567-36705442	0
1500017E21Rik	chr19-36688149-36688649	0.0631266	-0.189161	0.018	0.022	1	ENSMUST00000149601	ENSMUSG00000087579	processed_transcript	gap	chr19-36658567-36705442	0
1500017E21Rik	chr19-36689185-36689685	0.0226763	-0.338459	0.014	0.018	1	ENSMUST00000149601	ENSMUSG00000087579	processed_transcript	gap	chr19-36658567-36705442	0
1500026H17Rik	chr10-89686688-89687188	0.31627	0.600543	0.019	0.012	1	ENSMUST00000181598	ENSMUSG00000097383	lincRNA	gap	chr10-89686520-89689148	0
1520401A03Rik	chr17-23699216-23699716	0.987172	0.259835	0.114	0.096	1	ENSMUST00000178006	ENSMUSG00000043747	processed_transcript	exon	chr17-23704488-23705235	4771
1520401A03Rik	chr17-23700017-23700517	0.269249	0.286083	0.28	0.235	1	ENSMUST00000178006	ENSMUSG00000043747	processed_transcript	exon	chr17-23704488-23705235	3970
1520401A03Rik	chr17-23704714-23705214	0.00142542	-0.407618	0.021	0.026	1	ENSMUST00000177300	ENSMUSG00000043747	processed_transcript	exon	chr17-23705058-23705235	0
1520401A03Rik	chr17-23706160-23706660	0.413074	0.197234	0.057	0.048	1	ENSMUST00000178006	ENSMUSG00000043747	processed_transcript	gap	chr17-23706327-23707412	0
1600002D24Rik	chr16-95849190-95849690	1.48087e-08	-0.8418	0.018	0.028	0.0055565	ENSMUST00000136744	ENSMUSG00000086899	lincRNA	gap	chr16-95843258-95897983	0
1600002D24Rik	chr16-95819891-95820391	0.663169	0.348288	0.02	0.017	1	ENSMUST00000136744	ENSMUSG00000086899	lincRNA	exon	chr16-95831123-95832494	10731
1600002D24Rik	chr16-95824515-95825015	0.0811988	-0.126766	0.016	0.015	1	ENSMUST00000136744	ENSMUSG00000086899	lincRNA	exon	chr16-95831123-95832494	6107
1600002D24Rik	chr16-95825649-95826149	0.750089	0.27151	0.01	0.01	1	ENSMUST00000136744	ENSMUSG00000086899	lincRNA	exon	chr16-95831123-95832494	4973
1600002D24Rik	chr16-95831847-95832347	0.0634101	0.101876	0.086	0.081	1	ENSMUST00000136744	ENSMUSG00000086899	lincRNA	exon	chr16-95831123-95832494	0
1600002D24Rik	chr16-95833380-95833880	0.639306	0.178253	0.014	0.012	1	ENSMUST00000136744	ENSMUSG00000086899	lincRNA	gap	chr16-95832495-95843202	0
1600002D24Rik	chr16-95851886-95852386	0.351933	0.123905	0.067	0.058	1	ENSMUST00000136744	ENSMUSG00000086899	lincRNA	gap	chr16-95843258-95897983	0
1600002D24Rik	chr16-95860659-95861159	0.364676	0.394738	0.056	0.042	1	ENSMUST00000136744	ENSMUSG00000086899	lincRNA	gap	chr16-95843258-95897983	0
1600002D24Rik	chr16-95861250-95861750	0.00806559	0.417411	0.183	0.139	1	ENSMUST00000136744	ENSMUSG00000086899	lincRNA	gap	chr16-95843258-95897983	0
1600002D24Rik	chr16-95864124-95864624	0.00194471	0.418878	0.215	0.172	1	ENSMUST00000136744	ENSMUSG00000086899	lincRNA	gap	chr16-95843258-95897983	0
1600002D24Rik	chr16-95869397-95869897	0.597352	0.486452	0.013	0.009	1	ENSMUST00000136744	ENSMUSG00000086899	lincRNA	gap	chr16-95843258-95897983	0
1600002D24Rik	chr16-95870000-95870500	0.392688	0.421099	0.03	0.022	1	ENSMUST00000136744	ENSMUSG00000086899	lincRNA	gap	chr16-95843258-95897983	0
1600002D24Rik	chr16-95872379-95872879	0.132279	0.312986	0.198	0.164	1	ENSMUST00000136744	ENSMUSG00000086899	lincRNA	gap	chr16-95843258-95897983	0
1600002D24Rik	chr16-95890012-95890512	0.180682	0.493762	0.037	0.027	1	ENSMUST00000136744	ENSMUSG00000086899	lincRNA	gap	chr16-95843258-95897983	0
1600002D24Rik	chr16-95893609-95894109	0.268867	0.601727	0.013	0.008	1	ENSMUST00000136744	ENSMUSG00000086899	lincRNA	gap	chr16-95843258-95897983	0
1600002D24Rik	chr16-95903438-95903938	0.0416451	0.77883	0.017	0.01	1	ENSMUST00000127413	ENSMUSG00000086899	lincRNA	gap	chr16-95843258-95929015	0
1600002H07Rik	chr17-24220592-24221092	0.488284	0.278795	0.288	0.241	1	ENSMUST00000124557	ENSMUSG00000024118	protein_coding	cds	chr17-24220691-24220692	0
1600002K03Rik	chr10-80172897-80173397	0.000183142	0.502937	0.227	0.164	1	ENSMUST00000041882	ENSMUSG00000035595	protein_coding	cds	chr10-80172966-80173174	0
1600002K03Rik	chr10-80173467-80173967	0.371412	0.520035	0.023	0.018	1	ENSMUST00000041882	ENSMUSG00000035595	protein_coding	gap	chr10-80173175-80174208	0
1600002K03Rik	chr10-80174680-80175180	0.584775	0.372357	0.019	0.014	1	ENSMUST00000041882	ENSMUSG00000035595	protein_coding	cds	chr10-80174817-80174817	0
1600002K03Rik	chr10-80175445-80175945	0.0195258	0.720406	0.033	0.021	1	ENSMUST00000041882	ENSMUSG00000035595	protein_coding	utr	chr10-80174818-80175146	298
1600010M07Rik	chr7-110116776-110117276	2.6756e-32	-0.733427	0.083	0.132	1.00394e-26	ENSMUST00000185931	ENSMUSG00000101585	lincRNA	gap	chr7-110003716-110147627	0
1600010M07Rik	chr7-110118479-110118979	3.01383e-08	-0.396789	0.048	0.057	0.0113085	ENSMUST00000185931	ENSMUSG00000101585	lincRNA	gap	chr7-110003716-110147627	0
1600010M07Rik	chr7-109993430-109993930	0.401068	0.193696	0.187	0.167	1	ENSMUST00000191157	ENSMUSG00000101585	lincRNA	exon	chr7-109998376-109998773	4445
1600010M07Rik	chr7-110002951-110003451	0.544484	0.302592	0.179	0.146	1	ENSMUST00000191157	ENSMUSG00000101585	lincRNA	gap	chr7-109998774-110003585	0
1600010M07Rik	chr7-110061800-110062300	0.213465	0.31659	0.294	0.24	1	ENSMUST00000185931	ENSMUSG00000101585	lincRNA	gap	chr7-110003716-110147627	0
1600010M07Rik	chr7-110083739-110084239	0.972163	0.274214	0.024	0.02	1	ENSMUST00000185931	ENSMUSG00000101585	lincRNA	gap	chr7-110003716-110147627	0
1600010M07Rik	chr7-110109159-110109659	0.720655	0.292741	0.064	0.052	1	ENSMUST00000185931	ENSMUSG00000101585	lincRNA	gap	chr7-110003716-110147627	0
1600010M07Rik	chr7-110121554-110122054	0.00623907	0.24952	0.541	0.473	1	ENSMUST00000185931	ENSMUSG00000101585	lincRNA	gap	chr7-110003716-110147627	0
1600010M07Rik	chr7-110122971-110123471	0.388774	0.245121	0.111	0.09	1	ENSMUST00000185931	ENSMUSG00000101585	lincRNA	gap	chr7-110003716-110147627	0
1600010M07Rik	chr7-110156761-110157261	0.00291165	-0.137214	0.05	0.051	1	ENSMUST00000185931	ENSMUSG00000101585	lincRNA	exon	chr7-110150565-110151202	5558
1600010M07Rik	chr7-110162643-110163143	0.10892	-0.171619	0.014	0.014	1	ENSMUST00000185931	ENSMUSG00000101585	lincRNA	exon	chr7-110150565-110151202	11440
1600010M07Rik	chr7-110163434-110163934	0.0710235	-0.102179	0.02	0.021	1	ENSMUST00000185931	ENSMUSG00000101585	lincRNA	exon	chr7-110150565-110151202	12231
1600010M07Rik	chr7-110164068-110164568	0.774486	0.274645	0.269	0.221	1	ENSMUST00000185931	ENSMUSG00000101585	lincRNA	exon	chr7-110150565-110151202	12865
1600010M07Rik	chr7-110164708-110165208	0.899571	0.264976	0.216	0.181	1	ENSMUST00000185931	ENSMUSG00000101585	lincRNA	exon	chr7-110150565-110151202	13505
1600010M07Rik	chr7-110180582-110181082	2.32655e-05	0.90825	0.055	0.03	1	ENSMUST00000185931	ENSMUSG00000101585	lincRNA	exon	chr7-110150565-110151202	29379
1600012H06Rik	chr17-14942356-14942856	0.738324	0.413144	0.022	0.015	1	ENSMUST00000052691	ENSMUSG00000050088	protein_coding	exon	chr17-14943184-14943319	327
1600012H06Rik	chr17-14942875-14943375	0.138875	0.328529	0.292	0.248	1	ENSMUST00000174004	ENSMUSG00000050088	protein_coding	utr	chr17-14943269-14943319	0
1600012H06Rik	chr17-14943411-14943911	0.862082	0.357537	0.062	0.045	1	ENSMUST00000174004	ENSMUSG00000050088	protein_coding	cds	chr17-14943613-14944170	0
1600014C10Rik	chr7-38167604-38168104	0.194871	0.421859	0.05	0.037	1	ENSMUST00000165308	ENSMUSG00000054676	protein_coding	exon	chr7-38183217-38183521	15112
1600014C10Rik	chr7-38182493-38182993	0.306546	0.373338	0.115	0.088	1	ENSMUST00000165308	ENSMUSG00000054676	protein_coding	exon	chr7-38183217-38183521	223
1600014C10Rik	chr7-38183837-38184337	1.1819e-05	0.646912	0.143	0.093	1	ENSMUST00000177983	ENSMUSG00000054676	protein_coding	utr	chr7-38183848-38183899	0
1600014C10Rik	chr7-38184411-38184911	0.128426	0.767065	0.013	0.007	1	ENSMUST00000179992	ENSMUSG00000054676	protein_coding	gap	chr7-38184026-38188605	0
1600014C10Rik	chr7-38197031-38197531	0.49605	0.412275	0.021	0.015	1	ENSMUST00000165308	ENSMUSG00000054676	protein_coding	utr	chr7-38194971-38197563	0
1600014C10Rik	chr7-38200882-38201382	0.433108	0.317896	0.129	0.107	1	ENSMUST00000178876	ENSMUSG00000054676	protein_coding	exon	chr7-38194704-38197568	3313
1600014C23Rik	chr17-45718243-45718743	0.546726	0.441479	0.025	0.018	1	ENSMUST00000178179	ENSMUSG00000094690	protein_coding	utr	chr17-45732864-45733024	14120
1600014C23Rik	chr17-45724168-45724668	0.388786	0.180333	0.063	0.056	1	ENSMUST00000178179	ENSMUSG00000094690	protein_coding	utr	chr17-45732864-45733024	8195
1600014C23Rik	chr17-45731088-45731588	0.535939	0.37007	0.047	0.039	1	ENSMUST00000178179	ENSMUSG00000094690	protein_coding	utr	chr17-45732864-45733024	1275
1600014C23Rik	chr17-45733634-45734134	0.00905934	-0.510294	0.008	0.011	1	ENSMUST00000178179	ENSMUSG00000094690	protein_coding	cds	chr17-45733586-45733793	0
1600014K23Rik	chrX-85319171-85319671	0.112379	-0.205905	0.01	0.011	1	ENSMUST00000048382	ENSMUSG00000035491	protein_coding	utr	chrX-85270162-85270288	48882
1600019K03Rik	chr16-35515926-35516426	0.0984828	-0.198309	0.015	0.016	1	ENSMUST00000187829	ENSMUSG00000099429	lincRNA	exon	chr16-35509303-35509419	6506
1600020E01Rik	chr6-86570775-86571275	9.83534e-15	0.6694	0.257	0.175	3.69042e-09	ENSMUST00000181928	ENSMUSG00000097048	lincRNA	exon	chr6-86564276-86564442	6332
1600020E01Rik	chr6-86528275-86528775	4.20889e-10	1.37533	0.048	0.02	0.000157926	ENSMUST00000181928	ENSMUSG00000097048	lincRNA	gap	chr6-86527975-86532192	0
1600020E01Rik	chr6-86578312-86578812	9.35942e-09	1.87478	0.027	0.008	0.00351184	ENSMUST00000181928	ENSMUSG00000097048	lincRNA	exon	chr6-86564276-86564442	13869
1600020E01Rik	chr6-86584982-86585482	1.14502e-08	0.503556	0.339	0.26	0.00429633	ENSMUST00000181928	ENSMUSG00000097048	lincRNA	exon	chr6-86564276-86564442	20539
1600020E01Rik	chr6-86569273-86569773	1.29074e-06	0.893114	0.085	0.047	0.48431	ENSMUST00000181928	ENSMUSG00000097048	lincRNA	exon	chr6-86564276-86564442	4830
1600020E01Rik	chr6-86526493-86526993	0.0364912	0.417882	0.244	0.185	1	ENSMUST00000180896	ENSMUSG00000097048	lincRNA	exon	chr6-86526271-86527974	0
1600020E01Rik	chr6-86527040-86527540	0.105519	0.508829	0.102	0.07	1	ENSMUST00000181928	ENSMUSG00000097048	lincRNA	gap	chr6-86527532-86527890	0
1600020E01Rik	chr6-86545178-86545678	0.530277	0.379401	0.04	0.031	1	ENSMUST00000181928	ENSMUSG00000097048	lincRNA	gap	chr6-86532308-86563431	0
1600020E01Rik	chr6-86585876-86586376	0.501338	0.165853	0.024	0.022	1	ENSMUST00000181928	ENSMUSG00000097048	lincRNA	exon	chr6-86564276-86564442	21433
1600020E01Rik	chr6-86594564-86595064	0.0657191	0.765836	0.019	0.011	1	ENSMUST00000181928	ENSMUSG00000097048	lincRNA	exon	chr6-86564276-86564442	30121
1600020E01Rik	chr6-86541608-86542108	0.299872	0.576589	0.011	0.007	1	ENSMUST00000181928	ENSMUSG00000097048	lincRNA	gap	chr6-86532308-86563431	0
1600020E01Rik	chr6-86556623-86557123	0.192985	0.78235	0.012	0.006	1	ENSMUST00000181928	ENSMUSG00000097048	lincRNA	gap	chr6-86532308-86563431	0
1600020E01Rik	chr6-86570220-86570720	0.0226358	0.630846	0.053	0.033	1	ENSMUST00000181928	ENSMUSG00000097048	lincRNA	exon	chr6-86564276-86564442	5777
1600020E01Rik	chr6-86571360-86571860	0.00142667	0.962808	0.035	0.018	1	ENSMUST00000181928	ENSMUSG00000097048	lincRNA	exon	chr6-86564276-86564442	6917
1600020E01Rik	chr6-86583477-86583977	0.400429	0.515965	0.021	0.014	1	ENSMUST00000181928	ENSMUSG00000097048	lincRNA	exon	chr6-86564276-86564442	19034
1600020E01Rik	chr6-86584273-86584773	0.654893	0.331719	0.129	0.103	1	ENSMUST00000181928	ENSMUSG00000097048	lincRNA	exon	chr6-86564276-86564442	19830
1700001C02Rik	chr5-30482255-30482755	0.478882	0.112915	0.015	0.014	1	ENSMUST00000114743	ENSMUSG00000029182	protein_coding	gap	chr5-30482189-30483867	0
1700001C19Rik	chr17-47428944-47429444	0.729199	0.243768	0.031	0.025	1	ENSMUST00000160678	ENSMUSG00000047150	protein_coding	gap	chr17-47413895-47433335	0
1700001C19Rik	chr17-47436249-47436749	0.196692	0.386721	0.103	0.08	1	ENSMUST00000061885	ENSMUSG00000047150	protein_coding	cds	chr17-47436607-47436794	0
1700001C19Rik	chr17-47437052-47437552	3.03184e-06	0.790315	0.099	0.058	1	ENSMUST00000061885	ENSMUSG00000047150	protein_coding	cds	chr17-47437191-47437214	0
1700001D01Rik	chr8-61282780-61283280	0.605437	0.199444	0.035	0.031	1	ENSMUST00000188654	ENSMUSG00000099419	lincRNA	gap	chr8-61282887-61288743	0
1700001D01Rik	chr8-61283548-61284048	0.0486862	0.385016	0.169	0.129	1	ENSMUST00000188654	ENSMUSG00000099419	lincRNA	gap	chr8-61282887-61288743	0
1700001D01Rik	chr8-61287934-61288434	0.8463	0.286715	0.01	0.008	1	ENSMUST00000188654	ENSMUSG00000099419	lincRNA	gap	chr8-61282887-61288743	0
1700001D01Rik	chr8-61288610-61289110	0.178794	0.502848	0.04	0.03	1	ENSMUST00000188654	ENSMUSG00000099419	lincRNA	gap	chr8-61282887-61288743	0
1700001G01Rik	chr18-17209872-17210372	0.244519	-0.142756	0.01	0.012	1	ENSMUST00000147119	ENSMUSG00000087170	lincRNA	exon	chr18-17137139-17137559	72312
1700001G01Rik	chr18-17623440-17623940	0.0227547	0.604175	0.034	0.024	1	ENSMUST00000147119	ENSMUSG00000087170	lincRNA	exon	chr18-17137139-17137559	485880
1700001G01Rik	chr18-17624099-17624599	0.345678	0.412583	0.038	0.03	1	ENSMUST00000147119	ENSMUSG00000087170	lincRNA	exon	chr18-17137139-17137559	486539
1700001G01Rik	chr18-17624652-17625152	0.828821	0.17331	0.027	0.023	1	ENSMUST00000147119	ENSMUSG00000087170	lincRNA	exon	chr18-17137139-17137559	487092
1700001G01Rik	chr18-17640795-17641295	0.988649	0.205308	0.012	0.009	1	ENSMUST00000147119	ENSMUSG00000087170	lincRNA	exon	chr18-17137139-17137559	503235
1700001G01Rik	chr18-17680459-17680959	0.769294	0.216141	0.106	0.091	1	ENSMUST00000147119	ENSMUSG00000087170	lincRNA	exon	chr18-17137139-17137559	542899
1700001G01Rik	chr18-17730317-17730817	0.931291	0.255923	0.017	0.015	1	ENSMUST00000147119	ENSMUSG00000087170	lincRNA	exon	chr18-17137139-17137559	592757
1700001G01Rik	chr18-17731962-17732462	0.112693	-0.157004	0.018	0.019	1	ENSMUST00000147119	ENSMUSG00000087170	lincRNA	exon	chr18-17137139-17137559	594402
1700001G11Rik	chr14-66294873-66295373	0.974659	0.349321	0.01	0.008	1	ENSMUST00000145637	ENSMUSG00000085984	processed_transcript	exon	chr14-66295335-66295586	0
1700001G11Rik	chr14-66295769-66296269	0.468448	0.451681	0.012	0.009	1	ENSMUST00000153646	ENSMUSG00000085984	processed_transcript	gap	chr14-66296145-66296808	0
1700001L05Rik	chr15-83365648-83366148	0.0530651	-0.20397	0.01	0.01	1	ENSMUST00000179705	ENSMUSG00000075511	lincRNA	gap	chr15-83365514-83366868	0
1700001L19Rik	chr13-68605638-68606138	0.254153	0.13605	0.076	0.07	1	ENSMUST00000022007	ENSMUSG00000021534	protein_coding	gap	chr13-68597728-68611160	0
1700001O22Rik	chr2-30772955-30773455	3.37946e-12	0.719429	0.216	0.139	1.26804e-06	ENSMUST00000139968	ENSMUSG00000044320	protein_coding	exon	chr2-30794769-30795009	21313
1700001O22Rik	chr2-30757801-30758301	0.41079	0.434106	0.049	0.037	1	ENSMUST00000139968	ENSMUSG00000044320	protein_coding	exon	chr2-30794769-30795009	36467
1700001O22Rik	chr2-30758323-30758823	0.300223	0.194626	0.271	0.235	1	ENSMUST00000139968	ENSMUSG00000044320	protein_coding	exon	chr2-30794769-30795009	35945
1700001O22Rik	chr2-30758912-30759412	0.99978	0.299618	0.046	0.039	1	ENSMUST00000139968	ENSMUSG00000044320	protein_coding	exon	chr2-30794769-30795009	35356
1700001O22Rik	chr2-30769161-30769661	0.92925	0.319422	0.024	0.019	1	ENSMUST00000139968	ENSMUSG00000044320	protein_coding	exon	chr2-30794769-30795009	25107
1700001O22Rik	chr2-30771449-30771949	0.000228747	1.09307	0.032	0.016	1	ENSMUST00000139968	ENSMUSG00000044320	protein_coding	exon	chr2-30794769-30795009	22819
1700001O22Rik	chr2-30772103-30772603	0.0012177	0.619205	0.105	0.073	1	ENSMUST00000139968	ENSMUSG00000044320	protein_coding	exon	chr2-30794769-30795009	22165
1700001O22Rik	chr2-30773786-30774286	0.00446532	1.12443	0.02	0.008	1	ENSMUST00000139968	ENSMUSG00000044320	protein_coding	exon	chr2-30794769-30795009	20482
1700001O22Rik	chr2-30783273-30783773	0.407934	0.385009	0.087	0.067	1	ENSMUST00000139968	ENSMUSG00000044320	protein_coding	exon	chr2-30794769-30795009	10995
1700001O22Rik	chr2-30784548-30785048	0.0129324	0.37567	0.266	0.215	1	ENSMUST00000139968	ENSMUSG00000044320	protein_coding	exon	chr2-30794769-30795009	9720
1700001O22Rik	chr2-30785914-30786414	0.0129625	0.931467	0.021	0.012	1	ENSMUST00000139968	ENSMUSG00000044320	protein_coding	exon	chr2-30794769-30795009	8354
1700001O22Rik	chr2-30794455-30794955	0.0291214	0.387932	0.256	0.198	1	ENSMUST00000139968	ENSMUSG00000044320	protein_coding	exon	chr2-30794769-30795009	0
1700001O22Rik	chr2-30796417-30796917	0.0156479	-0.104156	0.025	0.026	1	ENSMUST00000050003	ENSMUSG00000044320	protein_coding	cds	chr2-30796401-30796566	0
1700001O22Rik	chr2-30801011-30801511	0.38579	0.135722	0.025	0.022	1	ENSMUST00000050003	ENSMUSG00000044320	protein_coding	cds	chr2-30801140-30801557	0
1700003E16Rik	chr6-83156139-83156639	0.599924	0.391289	0.046	0.035	1	ENSMUST00000032106	ENSMUSG00000030030	protein_coding	cds	chr6-83156573-83156590	0
1700003E16Rik	chr6-83159385-83159885	0.361518	0.450053	0.034	0.025	1	ENSMUST00000032106	ENSMUSG00000030030	protein_coding	gap	chr6-83156591-83160911	0
1700003E16Rik	chr6-83162754-83163254	0.632218	0.191707	0.022	0.018	1	ENSMUST00000032106	ENSMUSG00000030030	protein_coding	cds	chr6-83161557-83162891	0
1700003F12Rik	chr2-154548677-154549177	0.000374086	-0.380809	0.026	0.034	1	ENSMUST00000109709	ENSMUSG00000038523	protein_coding	cds	chr2-154548942-154549067	0
1700003G18Rik	chr7-116092479-116092979	0.351353	0.428532	0.057	0.043	1	ENSMUST00000150518	ENSMUSG00000087621	processed_transcript	gap	chr7-116089191-116093061	0
1700003L19Rik	chr16-12685694-12686194	1.52419e-06	-0.576989	0.027	0.041	0.571906	ENSMUST00000190074	ENSMUSG00000101565	lincRNA	exon	chr16-12811390-12811522	125195
1700003M02Rik	chr4-34701472-34701972	0.0582472	0.773792	0.014	0.009	1	ENSMUST00000135563	ENSMUSG00000028294	protein_coding	gap	chr4-34692531-34711401	0
1700003M02Rik	chr4-34729966-34730466	0.764909	0.233739	0.065	0.055	1	ENSMUST00000162495	ENSMUSG00000028294	protein_coding	utr	chr4-34730060-34730195	0
1700003M07Rik	chr4-129959424-129959924	0.595695	0.394944	0.041	0.031	1	ENSMUST00000147634	ENSMUSG00000085389	lincRNA	exon	chr4-129960374-129960561	449
1700006E09Rik	chr11-101984059-101984559	0.192697	0.305589	0.343	0.283	1	ENSMUST00000176722	ENSMUSG00000010841	protein_coding	utr	chr11-101984279-101984378	0
1700006H21Rik	chr13-107600545-107601045	0.902608	0.294418	0.083	0.07	1	ENSMUST00000188490	ENSMUSG00000102000	lincRNA	exon	chr13-107687397-107687584	86351
1700006H21Rik	chr13-107607302-107607802	0.88524	0.341722	0.122	0.095	1	ENSMUST00000188490	ENSMUSG00000102000	lincRNA	exon	chr13-107687397-107687584	79594
1700006H21Rik	chr13-107616717-107617217	0.091541	0.840116	0.01	0.006	1	ENSMUST00000188490	ENSMUSG00000102000	lincRNA	exon	chr13-107687397-107687584	70179
1700006H21Rik	chr13-107646031-107646531	0.562446	0.143194	0.015	0.013	1	ENSMUST00000188490	ENSMUSG00000102000	lincRNA	exon	chr13-107687397-107687584	40865
1700006H21Rik	chr13-107676292-107676792	9.55995e-05	0.451854	0.234	0.18	1	ENSMUST00000188490	ENSMUSG00000102000	lincRNA	exon	chr13-107687397-107687584	10604
1700007F19Rik	chr3-58122631-58123131	0.42928	0.383306	0.067	0.055	1	ENSMUST00000188418	ENSMUSG00000100666	lincRNA	exon	chr3-58141707-58142886	18575
1700007F19Rik	chr3-58162256-58162756	0.0295829	0.122559	0.336	0.309	1	ENSMUST00000188418	ENSMUSG00000100666	lincRNA	gap	chr3-58162467-58163506	0
1700007F19Rik	chr3-58163715-58164215	0.531341	0.184949	0.067	0.056	1	ENSMUST00000188418	ENSMUSG00000100666	lincRNA	gap	chr3-58163554-58163761	0
1700007F19Rik	chr3-58210954-58211454	0.0307895	-0.450397	0.008	0.01	1	ENSMUST00000188418	ENSMUSG00000100666	lincRNA	exon	chr3-58163762-58163807	47146
1700007F19Rik	chr3-58228229-58228729	0.000261903	-0.827597	0.008	0.014	1	ENSMUST00000188418	ENSMUSG00000100666	lincRNA	exon	chr3-58163762-58163807	64421
1700007J10Rik	chr11-59732581-59733081	0.0198801	-0.120787	0.029	0.032	1	ENSMUST00000153431	ENSMUSG00000086330	processed_transcript	gap	chr11-59731629-59733794	0
1700007J10Rik	chr11-59733570-59734070	0.00461665	1.34717	0.011	0.004	1	ENSMUST00000153431	ENSMUSG00000086330	processed_transcript	gap	chr11-59731629-59733794	0
1700007K13Rik	chr2-28466089-28466589	0.00096877	-0.159436	0.046	0.05	1	ENSMUST00000127683	ENSMUSG00000026831	protein_coding	cds	chr2-28466034-28466269	0
1700007L15Rik	chr16-33344964-33345464	0.821008	0.223835	0.012	0.011	1	ENSMUST00000180923	ENSMUSG00000097318	lincRNA	exon	chr16-33379855-33380379	34390
1700007L15Rik	chr16-33379891-33380391	0.816261	0.30417	0.019	0.014	1	ENSMUST00000180923	ENSMUSG00000097318	lincRNA	gap	chr16-33380380-33380515	0
1700008K24Rik	chr17-49231256-49231756	8.47165e-07	-0.687743	0.019	0.027	0.317873	ENSMUST00000186479	ENSMUSG00000101012	lincRNA	exon	chr17-49113173-49113535	117720
1700008O03Rik	chr7-44359853-44360353	0.00781619	-0.107444	0.032	0.036	1	ENSMUST00000150886	ENSMUSG00000008028	protein_coding	cds	chr7-44360237-44360381	0
1700008O03Rik	chr7-44373706-44374206	0.235223	0.328364	0.211	0.17	1	ENSMUST00000150034	ENSMUSG00000008028	protein_coding	gap	chr7-44363016-44385609	0
1700008O03Rik	chr7-44374239-44374739	0.818787	0.310727	0.085	0.066	1	ENSMUST00000107933	ENSMUSG00000008028	protein_coding	cds	chr7-44374323-44374389	0
1700009P17Rik	chr1-171113802-171114302	1.1794e-08	0.509659	0.302	0.224	0.00442536	ENSMUST00000129651	ENSMUSG00000026649	protein_coding	cds	chr1-171113938-171114096	0
1700009P17Rik	chr1-171118184-171118684	0.523107	0.386967	0.057	0.043	1	ENSMUST00000151340	ENSMUSG00000026649	protein_coding	gap	chr1-171114097-171123045	0
1700010I02Rik	chr3-7785953-7786453	0.00979664	-0.451901	0.011	0.015	1	ENSMUST00000188525	ENSMUSG00000100010	protein_coding	utr	chr3-7925303-7925340	138849
1700010I02Rik	chr3-7811262-7811762	9.74445e-05	-0.676216	0.014	0.021	1	ENSMUST00000188525	ENSMUSG00000100010	protein_coding	utr	chr3-7925303-7925340	113540
1700010I14Rik	chr17-8988026-8988526	0.0171226	0.634399	0.069	0.047	1	ENSMUST00000151609	ENSMUSG00000023873	protein_coding	cds	chr17-8988397-8988421	0
1700010I14Rik	chr17-8988673-8989173	0.853709	0.268939	0.016	0.014	1	ENSMUST00000151609	ENSMUSG00000023873	protein_coding	gap	chr17-8988422-8992045	0
1700010I14Rik	chr17-9031675-9032175	0.00909397	-0.257654	0.023	0.026	1	ENSMUST00000024650	ENSMUSG00000023873	protein_coding	utr	chr17-9008214-9008319	23355
1700010L04Rik	chr7-82854230-82854730	0.18625	-0.120116	0.012	0.013	1	ENSMUST00000179662	ENSMUSG00000030636	protein_coding	gap	chr7-82854062-82857383	0
1700011A15Rik	chr15-101453274-101453774	0.357132	0.408049	0.047	0.035	1	ENSMUST00000023781	ENSMUSG00000063971	protein_coding	cds	chr15-101453472-101453629	0
1700011B04Rik	chr13-35188992-35189492	2.17943e-06	-0.445093	0.04	0.051	0.817766	ENSMUST00000189140	ENSMUSG00000102099	processed_transcript	exon	chr13-35187535-35188017	974
1700011B04Rik	chr13-35165261-35165761	0.7429	0.167977	0.016	0.015	1	ENSMUST00000189905	ENSMUSG00000102099	processed_transcript	exon	chr13-35180267-35182749	14505
1700011B04Rik	chr13-35173085-35173585	2.03725e-05	1.43257	0.025	0.01	1	ENSMUST00000189905	ENSMUSG00000102099	processed_transcript	exon	chr13-35180267-35182749	6681
1700011B04Rik	chr13-35176762-35177262	0.950217	0.27522	0.019	0.017	1	ENSMUST00000189905	ENSMUSG00000102099	processed_transcript	exon	chr13-35180267-35182749	3004
1700011E24Rik	chr17-87395827-87396327	0.00915677	-0.241616	0.028	0.032	1	ENSMUST00000187078	ENSMUSG00000036557	protein_coding	gap	chr17-87395266-87422513	0
1700011H14Rik	chr14-49234736-49235236	0.866826	0.298594	0.035	0.028	1	ENSMUST00000148109	ENSMUSG00000021850	protein_coding	gap	chr14-49234565-49235879	0
1700011I03Rik	chr18-57674769-57675269	3.09004e-08	-0.501087	0.043	0.062	0.0115945	ENSMUST00000135806	ENSMUSG00000058925	protein_coding	gap	chr18-57594136-57730714	0
1700011I03Rik	chr18-57570823-57571323	0.0129861	-0.516265	0.007	0.01	1	ENSMUST00000135806	ENSMUSG00000058925	protein_coding	gap	chr18-57564043-57591967	0
1700011I03Rik	chr18-57660710-57661210	0.00464007	-0.434326	0.013	0.019	1	ENSMUST00000135806	ENSMUSG00000058925	protein_coding	gap	chr18-57594136-57730714	0
1700011I03Rik	chr18-57663318-57663818	0.000428007	-0.481677	0.017	0.021	1	ENSMUST00000135806	ENSMUSG00000058925	protein_coding	gap	chr18-57594136-57730714	0
1700011I03Rik	chr18-57666858-57667358	0.151914	-0.192239	0.008	0.01	1	ENSMUST00000123872	ENSMUSG00000058925	protein_coding	cds	chr18-57667235-57667367	0
1700011I03Rik	chr18-57671196-57671696	0.00974462	-0.137628	0.033	0.038	1	ENSMUST00000135806	ENSMUSG00000058925	protein_coding	gap	chr18-57594136-57730714	0
1700011I03Rik	chr18-57686661-57687161	0.0327733	-0.1235	0.029	0.03	1	ENSMUST00000135806	ENSMUSG00000058925	protein_coding	gap	chr18-57594136-57730714	0
1700011I03Rik	chr18-57744946-57745446	0.856962	0.383436	0.015	0.012	1	ENSMUST00000135806	ENSMUSG00000058925	protein_coding	utr	chr18-57730787-57731065	13880
1700011I03Rik	chr18-57745525-57746025	0.408271	0.136172	0.015	0.012	1	ENSMUST00000135806	ENSMUSG00000058925	protein_coding	utr	chr18-57730787-57731065	14459
1700011I03Rik	chr18-57747075-57747575	0.299628	0.443686	0.064	0.052	1	ENSMUST00000135806	ENSMUSG00000058925	protein_coding	utr	chr18-57730787-57731065	16009
1700011L22Rik	chr8-79206860-79207360	0.00861898	-0.312626	0.013	0.017	1	ENSMUST00000034109	ENSMUSG00000031682	protein_coding	utr	chr8-79210430-79210649	3069
1700011L22Rik	chr8-79209569-79210069	0.129607	0.522556	0.057	0.039	1	ENSMUST00000034109	ENSMUSG00000031682	protein_coding	utr	chr8-79210430-79210649	360
1700011L22Rik	chr8-79255919-79256419	0.437778	0.531117	0.018	0.013	1	ENSMUST00000034109	ENSMUSG00000031682	protein_coding	exon	chr8-79248220-79248583	7335
1700011L22Rik	chr8-79208646-79209146	0.0166653	0.451604	0.175	0.128	1	ENSMUST00000034109	ENSMUSG00000031682	protein_coding	utr	chr8-79210430-79210649	1283
1700012B09Rik	chr9-14764756-14765256	0.310376	0.122164	0.022	0.02	1	ENSMUST00000191047	ENSMUSG00000031927	protein_coding	gap	chr9-14761731-14766856	0
1700012I11Rik	chr15-67170601-67171101	0.728327	0.232024	0.051	0.04	1	ENSMUST00000187233	ENSMUSG00000102069	lincRNA	exon	chr15-67226769-67227080	55667
1700012I11Rik	chr15-67173037-67173537	0.677679	0.21929	0.02	0.016	1	ENSMUST00000187233	ENSMUSG00000102069	lincRNA	exon	chr15-67226769-67227080	53231
1700012I11Rik	chr15-67173943-67174443	0.543511	0.439907	0.049	0.034	1	ENSMUST00000187233	ENSMUSG00000102069	lincRNA	exon	chr15-67226769-67227080	52325
1700012I11Rik	chr15-67174444-67174944	0.0163302	0.44474	0.169	0.129	1	ENSMUST00000187233	ENSMUSG00000102069	lincRNA	exon	chr15-67226769-67227080	51824
1700012I11Rik	chr15-67175118-67175618	0.0340049	0.606244	0.054	0.036	1	ENSMUST00000187233	ENSMUSG00000102069	lincRNA	exon	chr15-67226769-67227080	51150
1700012I11Rik	chr15-67175951-67176451	0.948402	0.300085	0.072	0.058	1	ENSMUST00000187233	ENSMUSG00000102069	lincRNA	exon	chr15-67226769-67227080	50317
1700012I11Rik	chr15-67460293-67460793	0.0965539	-0.102963	0.025	0.025	1	ENSMUST00000187233	ENSMUSG00000102069	lincRNA	exon	chr15-67376912-67377094	83198
1700012I11Rik	chr15-67176700-67177200	0.00559173	0.276649	0.49	0.416	1	ENSMUST00000187233	ENSMUSG00000102069	lincRNA	exon	chr15-67226769-67227080	49568
1700012I11Rik	chr15-67177636-67178136	0.530478	0.183493	0.031	0.027	1	ENSMUST00000187233	ENSMUSG00000102069	lincRNA	exon	chr15-67226769-67227080	48632
1700012I11Rik	chr15-67210133-67210633	0.158791	0.456689	0.044	0.033	1	ENSMUST00000187233	ENSMUSG00000102069	lincRNA	exon	chr15-67226769-67227080	16135
1700013D24Rik	chr6-124375456-124375956	3.10061e-05	-0.13545	0.1	0.108	1	ENSMUST00000112537	ENSMUSG00000079346	protein_coding	exon	chr6-124356878-124357086	18369
1700013F07Rik	chr3-108537206-108537706	0.969515	0.272932	0.075	0.062	1	ENSMUST00000029485	ENSMUSG00000027886	protein_coding	cds	chr3-108537619-108537699	0
1700013G24Rik	chr4-137443551-137444051	0.820815	0.293872	0.042	0.035	1	ENSMUST00000048893	ENSMUSG00000041399	protein_coding	exon	chr4-137453284-137453355	9232
1700013G24Rik	chr4-137460696-137461196	0.706726	0.194445	0.018	0.016	1	ENSMUST00000048893	ENSMUSG00000041399	protein_coding	utr	chr4-137455397-137455461	5234
1700015F17Rik	chr5-5481602-5482102	0.50659	0.144034	0.014	0.013	1	ENSMUST00000115447	ENSMUSG00000079666	protein_coding	exon	chr5-5478866-5479143	2458
1700015G11Rik	chr7-52017855-52018355	0.510855	0.187058	0.13	0.114	1	ENSMUST00000180038	ENSMUSG00000094445	protein_coding	exon	chr7-52015638-52015728	2126
1700016C15Rik	chr1-177700554-177701054	0.00193242	-0.811066	0.007	0.011	1	ENSMUST00000016106	ENSMUSG00000015962	protein_coding	exon	chr1-177729814-177729961	28759
1700016C15Rik	chr1-177702800-177703300	0.130881	0.11555	0.049	0.043	1	ENSMUST00000016106	ENSMUSG00000015962	protein_coding	exon	chr1-177729814-177729961	26513
1700016C15Rik	chr1-177703448-177703948	0.0142897	1.42856	0.01	0.005	1	ENSMUST00000016106	ENSMUSG00000015962	protein_coding	exon	chr1-177729814-177729961	25865
1700016C15Rik	chr1-177705141-177705641	0.906693	0.31616	0.01	0.008	1	ENSMUST00000016106	ENSMUSG00000015962	protein_coding	exon	chr1-177729814-177729961	24172
1700016C15Rik	chr1-177708476-177708976	0.0135849	0.864469	0.033	0.02	1	ENSMUST00000016106	ENSMUSG00000015962	protein_coding	exon	chr1-177729814-177729961	20837
1700016C15Rik	chr1-177718971-177719471	0.0275816	-0.450996	0.008	0.01	1	ENSMUST00000016106	ENSMUSG00000015962	protein_coding	exon	chr1-177729814-177729961	10342
1700016G22Rik	chr13-5845062-5845562	5.30549e-08	0.52446	0.284	0.209	0.0199072	ENSMUST00000186843	ENSMUSG00000100625	lincRNA	exon	chr13-5855508-5855951	9945
1700016G22Rik	chr13-5842853-5843353	2.1755e-06	-1.08397	0.008	0.017	0.816291	ENSMUST00000186843	ENSMUSG00000100625	lincRNA	exon	chr13-5855508-5855951	12154
1700016G22Rik	chr13-5424086-5424586	0.184867	0.626325	0.029	0.02	1	ENSMUST00000186843	ENSMUSG00000100625	lincRNA	exon	chr13-5855508-5855951	430921
1700016G22Rik	chr13-5433613-5434113	0.0706612	-0.128605	0.017	0.018	1	ENSMUST00000186843	ENSMUSG00000100625	lincRNA	exon	chr13-5855508-5855951	421394
1700016G22Rik	chr13-5436265-5436765	0.00281319	-0.229348	0.032	0.036	1	ENSMUST00000186843	ENSMUSG00000100625	lincRNA	exon	chr13-5855508-5855951	418742
1700016G22Rik	chr13-5592410-5592910	0.283038	0.346384	0.115	0.092	1	ENSMUST00000186843	ENSMUSG00000100625	lincRNA	exon	chr13-5855508-5855951	262597
1700016G22Rik	chr13-5604172-5604672	0.0165736	-0.162301	0.016	0.018	1	ENSMUST00000186843	ENSMUSG00000100625	lincRNA	exon	chr13-5855508-5855951	250835
1700016G22Rik	chr13-5614081-5614581	0.649649	0.164102	0.08	0.07	1	ENSMUST00000186843	ENSMUSG00000100625	lincRNA	exon	chr13-5855508-5855951	240926
1700016G22Rik	chr13-5614856-5615356	0.82815	0.281827	0.078	0.063	1	ENSMUST00000186843	ENSMUSG00000100625	lincRNA	exon	chr13-5855508-5855951	240151
1700016G22Rik	chr13-5628120-5628620	0.000259395	-0.823616	0.007	0.012	1	ENSMUST00000186843	ENSMUSG00000100625	lincRNA	exon	chr13-5855508-5855951	226887
1700016G22Rik	chr13-5665432-5665932	0.630906	0.21449	0.023	0.02	1	ENSMUST00000186843	ENSMUSG00000100625	lincRNA	exon	chr13-5855508-5855951	189575
1700016G22Rik	chr13-5666568-5667068	0.803229	0.359118	0.03	0.026	1	ENSMUST00000186843	ENSMUSG00000100625	lincRNA	exon	chr13-5855508-5855951	188439
1700016G22Rik	chr13-5696318-5696818	0.000970626	-0.122668	0.054	0.06	1	ENSMUST00000186843	ENSMUSG00000100625	lincRNA	exon	chr13-5855508-5855951	158689
1700016G22Rik	chr13-5697282-5697782	4.08021e-06	-0.263444	0.064	0.077	1	ENSMUST00000186843	ENSMUSG00000100625	lincRNA	exon	chr13-5855508-5855951	157725
1700016G22Rik	chr13-5713060-5713560	0.466655	0.113857	0.012	0.012	1	ENSMUST00000186843	ENSMUSG00000100625	lincRNA	exon	chr13-5855508-5855951	141947
1700016G22Rik	chr13-5714744-5715244	0.00114747	-0.420094	0.019	0.023	1	ENSMUST00000186843	ENSMUSG00000100625	lincRNA	exon	chr13-5855508-5855951	140263
1700016G22Rik	chr13-5728738-5729238	0.12651	0.762986	0.01	0.006	1	ENSMUST00000186843	ENSMUSG00000100625	lincRNA	exon	chr13-5855508-5855951	126269
1700016G22Rik	chr13-5769623-5770123	0.127416	0.822624	0.014	0.008	1	ENSMUST00000186843	ENSMUSG00000100625	lincRNA	exon	chr13-5855508-5855951	85384
1700016G22Rik	chr13-5802201-5802701	3.53653e-05	0.971518	0.046	0.025	1	ENSMUST00000186843	ENSMUSG00000100625	lincRNA	exon	chr13-5855508-5855951	52806
1700016G22Rik	chr13-5802788-5803288	0.270374	0.360833	0.103	0.081	1	ENSMUST00000186843	ENSMUSG00000100625	lincRNA	exon	chr13-5855508-5855951	52219
1700016G22Rik	chr13-5803502-5804002	1.69124e-05	0.506224	0.246	0.181	1	ENSMUST00000186843	ENSMUSG00000100625	lincRNA	exon	chr13-5855508-5855951	51505
1700016G22Rik	chr13-5804231-5804731	0.0720807	0.377651	0.193	0.149	1	ENSMUST00000186843	ENSMUSG00000100625	lincRNA	exon	chr13-5855508-5855951	50776
1700016G22Rik	chr13-5804864-5805364	0.40673	0.403867	0.053	0.038	1	ENSMUST00000186843	ENSMUSG00000100625	lincRNA	exon	chr13-5855508-5855951	50143
1700016G22Rik	chr13-5819072-5819572	0.0375638	-0.156419	0.024	0.028	1	ENSMUST00000186843	ENSMUSG00000100625	lincRNA	exon	chr13-5855508-5855951	35935
1700016G22Rik	chr13-5837324-5837824	0.345443	0.632001	0.013	0.008	1	ENSMUST00000186843	ENSMUSG00000100625	lincRNA	exon	chr13-5855508-5855951	17683
1700016G22Rik	chr13-5841350-5841850	0.534702	0.366022	0.044	0.035	1	ENSMUST00000186843	ENSMUSG00000100625	lincRNA	exon	chr13-5855508-5855951	13657
1700016G22Rik	chr13-5844135-5844635	0.975524	0.342075	0.014	0.01	1	ENSMUST00000186843	ENSMUSG00000100625	lincRNA	exon	chr13-5855508-5855951	10872
1700016G22Rik	chr13-5845582-5846082	0.0135405	0.476285	0.147	0.112	1	ENSMUST00000186843	ENSMUSG00000100625	lincRNA	exon	chr13-5855508-5855951	9425
1700016G22Rik	chr13-5858728-5859228	0.253813	0.665805	0.018	0.011	1	ENSMUST00000186843	ENSMUSG00000100625	lincRNA	exon	chr13-5857999-5858092	635
1700016H13Rik	chr5-103644097-103644597	6.97468e-07	1.13314	0.044	0.021	0.261704	ENSMUST00000119824	ENSMUSG00000029320	protein_coding	utr	chr5-103648039-103648820	3441
1700016H13Rik	chr5-103654185-103654685	0.0632439	1.05936	0.01	0.005	1	ENSMUST00000154408	ENSMUSG00000029320	protein_coding	gap	chr5-103649573-103654921	0
1700016H13Rik	chr5-103655188-103655688	0.146923	0.565605	0.04	0.027	1	ENSMUST00000154408	ENSMUSG00000029320	protein_coding	utr	chr5-103655604-103655723	0
1700016H13Rik	chr5-103659498-103659998	0.120415	0.686738	0.021	0.012	1	ENSMUST00000119824	ENSMUSG00000029320	protein_coding	exon	chr5-103655770-103656010	3487
1700016K19Rik	chr11-75976728-75977228	5.99798e-09	1.10321	0.07	0.033	0.00225056	ENSMUST00000066408	ENSMUSG00000053783	protein_coding	exon	chr11-75999912-76000266	22683
1700016K19Rik	chr11-75980464-75980964	0.544711	0.111382	0.04	0.037	1	ENSMUST00000066408	ENSMUSG00000053783	protein_coding	exon	chr11-75999912-76000266	18947
1700016K19Rik	chr11-76001396-76001896	0.765763	0.362345	0.012	0.009	1	ENSMUST00000066408	ENSMUSG00000053783	protein_coding	gap	chr11-76000267-76003003	0
1700016K19Rik	chr11-75999720-76000220	0.598272	0.239453	0.055	0.045	1	ENSMUST00000066408	ENSMUSG00000053783	protein_coding	cds	chr11-76000062-76000266	0
1700016P03Rik	chr11-75171049-75171549	0.733824	0.439952	0.012	0.008	1	ENSMUST00000134252	ENSMUSG00000085609	processed_transcript	exon	chr11-75172560-75172597	1010
1700016P03Rik	chr11-75171588-75172088	0.49146	0.55182	0.013	0.01	1	ENSMUST00000134252	ENSMUSG00000085609	processed_transcript	exon	chr11-75172560-75172597	471
1700016P03Rik	chr11-75172271-75172771	0.299808	0.108795	0.029	0.026	1	ENSMUST00000134252	ENSMUSG00000085609	processed_transcript	gap	chr11-75172598-75173977	0
1700016P03Rik	chr11-75172930-75173430	0.731845	0.321231	0.166	0.137	1	ENSMUST00000134252	ENSMUSG00000085609	processed_transcript	gap	chr11-75172598-75173977	0
1700016P03Rik	chr11-75173539-75174039	0.617489	0.354146	0.103	0.076	1	ENSMUST00000134252	ENSMUSG00000085609	processed_transcript	gap	chr11-75172598-75173977	0
1700017B05Rik	chr9-57259692-57260192	0.415705	0.191694	0.073	0.063	1	ENSMUST00000034846	ENSMUSG00000032300	protein_coding	gap	chr9-57259141-57262428	0
1700017B05Rik	chr9-57262475-57262975	0.000744449	0.651755	0.104	0.066	1	ENSMUST00000034846	ENSMUSG00000032300	protein_coding	utr	chr9-57262429-57262599	0
1700017B05Rik	chr9-57268006-57268506	0.164213	-0.148441	0.009	0.011	1	ENSMUST00000034846	ENSMUSG00000032300	protein_coding	exon	chr9-57262429-57262599	5406
1700017B05Rik	chr9-57260874-57261374	0.79622	0.452114	0.01	0.008	1	ENSMUST00000034846	ENSMUSG00000032300	protein_coding	gap	chr9-57259141-57262428	0
1700017B05Rik	chr9-57268648-57269148	0.000222123	-0.238901	0.042	0.047	1	ENSMUST00000034846	ENSMUSG00000032300	protein_coding	exon	chr9-57262429-57262599	6048
1700017D01Rik	chr19-11120950-11121450	0.205689	0.49413	0.032	0.023	1	ENSMUST00000025635	ENSMUSG00000024729	protein_coding	gap	chr19-11116517-11130485	0
1700017G19Rik	chr3-40391567-40392067	0.0896786	-0.10298	0.019	0.021	1	ENSMUST00000035860	ENSMUSG00000037884	lincRNA	exon	chr3-40504867-40506013	112799
1700017G19Rik	chr3-40444179-40444679	0.648598	0.186768	0.012	0.011	1	ENSMUST00000035860	ENSMUSG00000037884	lincRNA	exon	chr3-40504867-40506013	60187
1700017G19Rik	chr3-40523243-40523743	0.0300852	-0.240449	0.011	0.013	1	ENSMUST00000035860	ENSMUSG00000037884	lincRNA	exon	chr3-40522615-40522912	330
1700017I07Rik	chr9-89792994-89793494	0.353648	0.132346	0.028	0.026	1	ENSMUST00000184823	ENSMUSG00000098727	lincRNA	exon	chr9-89802870-89802933	9375
1700017J07Rik	chr2-168978855-168979355	0.377836	0.501174	0.018	0.013	1	ENSMUST00000140241	ENSMUSG00000086348	lincRNA	exon	chr2-168978727-168978906	0
1700017J07Rik	chr2-168980771-168981271	0.26026	0.362319	0.092	0.07	1	ENSMUST00000140241	ENSMUSG00000086348	lincRNA	exon	chr2-168978727-168978906	1864
1700018A04Rik	chr13-31567600-31568100	6.873e-22	1.99187	0.056	0.016	2.57889e-16	ENSMUST00000150418	ENSMUSG00000038408	lincRNA	gap	chr13-31567611-31579569	0
1700018A04Rik	chr13-31577508-31578008	0.41365	0.168173	0.093	0.085	1	ENSMUST00000150418	ENSMUSG00000038408	lincRNA	gap	chr13-31567611-31579569	0
1700018A04Rik	chr13-31578404-31578904	0.000603771	1.24153	0.021	0.01	1	ENSMUST00000150418	ENSMUSG00000038408	lincRNA	gap	chr13-31567611-31579569	0
1700018A04Rik	chr13-31579825-31580325	0.0220138	-0.176717	0.02	0.022	1	ENSMUST00000150418	ENSMUSG00000038408	lincRNA	gap	chr13-31580154-31582463	0
1700018B08Rik	chr8-121532318-121532818	0.103058	0.956779	0.01	0.006	1	ENSMUST00000183280	ENSMUSG00000031809	protein_coding	gap	chr8-121531915-121533694	0
1700019B03Rik	chr8-3475823-3476323	0.0204179	-0.281754	0.016	0.019	1	ENSMUST00000161680	ENSMUSG00000040340	protein_coding	cds	chr8-3475849-3476407	0
1700019E08Rik	chr2-45581003-45581503	0.0122124	-0.460233	0.008	0.013	1	ENSMUST00000153567	ENSMUSG00000086202	lincRNA	exon	chr2-45696605-45696629	115101
1700019E08Rik	chr2-45702336-45702836	0.00768852	-0.533647	0.009	0.014	1	ENSMUST00000153567	ENSMUSG00000086202	lincRNA	exon	chr2-45697987-45698447	3888
1700019G17Rik	chr6-85895204-85895704	0.511957	0.339891	0.091	0.075	1	ENSMUST00000159755	ENSMUSG00000068299	protein_coding	utr	chr6-85899051-85899207	3346
1700019G17Rik	chr6-85904728-85905228	0.0545723	0.463282	0.095	0.068	1	ENSMUST00000095757	ENSMUSG00000068299	protein_coding	utr	chr6-85904712-85904884	0
1700019G17Rik	chr6-85906799-85907299	1.12006e-05	-0.437522	0.032	0.042	1	ENSMUST00000095757	ENSMUSG00000068299	protein_coding	exon	chr6-85904712-85904884	1914
1700019L03Rik	chr2-32779098-32779598	0.350352	0.128074	0.036	0.033	1	ENSMUST00000102813	ENSMUSG00000038987	protein_coding	cds	chr2-32779290-32779420	0
1700019L03Rik	chr2-32784217-32784717	0.567162	0.222366	0.055	0.049	1	ENSMUST00000102813	ENSMUSG00000038987	protein_coding	cds	chr2-32784221-32784387	0
1700019O17Rik	chr1-86435347-86435847	1.33881e-06	-0.242614	0.072	0.083	0.502349	ENSMUST00000046004	ENSMUSG00000036574	protein_coding	utr	chr1-86427964-86428052	7294
1700019O17Rik	chr1-86416203-86416703	0.336261	0.191398	0.038	0.033	1	ENSMUST00000046004	ENSMUSG00000036574	protein_coding	exon	chr1-86426329-86428052	9625
1700019O17Rik	chr1-86420946-86421446	0.558549	0.227959	0.129	0.111	1	ENSMUST00000046004	ENSMUSG00000036574	protein_coding	exon	chr1-86426329-86428052	4882
1700019O17Rik	chr1-86421547-86422047	0.10587	0.732858	0.023	0.016	1	ENSMUST00000046004	ENSMUSG00000036574	protein_coding	exon	chr1-86426329-86428052	4281
1700019O17Rik	chr1-86433777-86434277	0.43021	0.215394	0.105	0.086	1	ENSMUST00000046004	ENSMUSG00000036574	protein_coding	utr	chr1-86427964-86428052	5724
1700019O17Rik	chr1-86434340-86434840	0.101594	0.272624	0.43	0.365	1	ENSMUST00000046004	ENSMUSG00000036574	protein_coding	utr	chr1-86427964-86428052	6287
1700019O17Rik	chr1-86439491-86439991	0.0119706	-0.49877	0.008	0.011	1	ENSMUST00000046004	ENSMUSG00000036574	protein_coding	utr	chr1-86427964-86428052	11438
1700019O17Rik	chr1-86440434-86440934	0.0808221	0.172535	0.216	0.192	1	ENSMUST00000046004	ENSMUSG00000036574	protein_coding	utr	chr1-86427964-86428052	12381
1700019O17Rik	chr1-86441299-86441799	0.0834658	0.142852	0.115	0.1	1	ENSMUST00000046004	ENSMUSG00000036574	protein_coding	utr	chr1-86427964-86428052	13246
1700019O17Rik	chr1-86442391-86442891	0.111787	0.360004	0.261	0.202	1	ENSMUST00000046004	ENSMUSG00000036574	protein_coding	utr	chr1-86427964-86428052	14338
1700019O17Rik	chr1-86447853-86448353	0.0040202	0.541688	0.099	0.069	1	ENSMUST00000046004	ENSMUSG00000036574	protein_coding	utr	chr1-86427964-86428052	19800
1700019O17Rik	chr1-86449900-86450400	0.908615	0.297893	0.033	0.025	1	ENSMUST00000046004	ENSMUSG00000036574	protein_coding	utr	chr1-86427964-86428052	21847
1700019O17Rik	chr1-86456801-86457301	3.37549e-05	1.11435	0.033	0.016	1	ENSMUST00000046004	ENSMUSG00000036574	protein_coding	utr	chr1-86427964-86428052	28748
1700019O17Rik	chr1-86462163-86462663	0.113258	0.425905	0.064	0.048	1	ENSMUST00000046004	ENSMUSG00000036574	protein_coding	utr	chr1-86427964-86428052	34110
1700019O17Rik	chr1-86464525-86465025	9.39393e-05	-0.113731	0.1	0.108	1	ENSMUST00000046004	ENSMUSG00000036574	protein_coding	utr	chr1-86427964-86428052	36472
1700019O17Rik	chr1-86465214-86465714	0.0137998	-0.181953	0.025	0.03	1	ENSMUST00000046004	ENSMUSG00000036574	protein_coding	utr	chr1-86427964-86428052	37161
1700019O17Rik	chr1-86470507-86471007	0.20141	0.23344	0.478	0.423	1	ENSMUST00000046004	ENSMUSG00000036574	protein_coding	utr	chr1-86427964-86428052	42454
1700019O17Rik	chr1-86471343-86471843	0.369346	0.423573	0.065	0.051	1	ENSMUST00000046004	ENSMUSG00000036574	protein_coding	utr	chr1-86427964-86428052	43290
1700019O17Rik	chr1-86472097-86472597	0.0362313	0.159633	0.292	0.259	1	ENSMUST00000046004	ENSMUSG00000036574	protein_coding	utr	chr1-86427964-86428052	44044
1700019O17Rik	chr1-86473038-86473538	0.542617	0.412611	0.03	0.023	1	ENSMUST00000046004	ENSMUSG00000036574	protein_coding	utr	chr1-86427964-86428052	44985
1700020I14Rik	chr2-119594006-119594506	0.822	0.258055	0.284	0.24	1	ENSMUST00000153581	ENSMUSG00000085438	lincRNA	gap	chr2-119594435-119596258	0
1700020I14Rik	chr2-119594669-119595169	0.361745	0.174675	0.052	0.044	1	ENSMUST00000153581	ENSMUSG00000085438	lincRNA	gap	chr2-119594435-119596258	0
1700020I14Rik	chr2-119602422-119602922	0.00696428	0.796722	0.033	0.019	1	ENSMUST00000153581	ENSMUSG00000085438	lincRNA	exon	chr2-119599588-119607502	0
1700020I14Rik	chr2-119603868-119604368	0.834846	0.289768	0.026	0.021	1	ENSMUST00000153581	ENSMUSG00000085438	lincRNA	exon	chr2-119599588-119607502	0
1700020L24Rik	chr11-83440273-83440773	0.00212085	0.52351	0.152	0.105	1	ENSMUST00000188702	ENSMUSG00000035085	protein_coding	cds	chr11-83440287-83440600	0
1700020M21Rik	chr9-120776579-120777079	3.18008e-10	0.714668	0.196	0.128	0.000119323	ENSMUST00000188320	ENSMUSG00000100146	lincRNA	exon	chr9-120913774-120914090	136694
1700020M21Rik	chr9-120853768-120854268	0.878978	0.325584	0.049	0.036	1	ENSMUST00000188320	ENSMUSG00000100146	lincRNA	exon	chr9-120913774-120914090	59505
1700020M21Rik	chr9-120854279-120854779	0.191874	0.147645	0.233	0.206	1	ENSMUST00000188320	ENSMUSG00000100146	lincRNA	exon	chr9-120913774-120914090	58994
1700020M21Rik	chr9-120855585-120856085	0.0203701	-0.116107	0.033	0.036	1	ENSMUST00000188320	ENSMUSG00000100146	lincRNA	exon	chr9-120913774-120914090	57688
1700020M21Rik	chr9-120910486-120910986	0.00123764	-0.276825	0.033	0.037	1	ENSMUST00000188320	ENSMUSG00000100146	lincRNA	exon	chr9-120913774-120914090	2787
1700020M21Rik	chr9-120913106-120913606	0.892297	0.245261	0.091	0.076	1	ENSMUST00000188320	ENSMUSG00000100146	lincRNA	exon	chr9-120913774-120914090	167
1700020M21Rik	chr9-120759580-120760080	0.657391	0.174946	0.021	0.017	1	ENSMUST00000188320	ENSMUSG00000100146	lincRNA	exon	chr9-120913774-120914090	153693
1700020M21Rik	chr9-120771817-120772317	0.104274	0.57799	0.039	0.026	1	ENSMUST00000188320	ENSMUSG00000100146	lincRNA	exon	chr9-120913774-120914090	141456
1700020M21Rik	chr9-120774868-120775368	0.255415	0.107243	0.043	0.036	1	ENSMUST00000188320	ENSMUSG00000100146	lincRNA	exon	chr9-120913774-120914090	138405
1700020M21Rik	chr9-120778356-120778856	0.762943	0.225297	0.27	0.237	1	ENSMUST00000188320	ENSMUSG00000100146	lincRNA	exon	chr9-120913774-120914090	134917
1700020M21Rik	chr9-120796522-120797022	4.48116e-05	-0.341341	0.038	0.046	1	ENSMUST00000188320	ENSMUSG00000100146	lincRNA	exon	chr9-120913774-120914090	116751
1700020M21Rik	chr9-120804757-120805257	0.887854	0.259969	0.118	0.098	1	ENSMUST00000188320	ENSMUSG00000100146	lincRNA	exon	chr9-120913774-120914090	108516
1700020M21Rik	chr9-120806374-120806874	0.764951	0.356262	0.016	0.012	1	ENSMUST00000188320	ENSMUSG00000100146	lincRNA	exon	chr9-120913774-120914090	106899
1700020M21Rik	chr9-120808618-120809118	0.0768575	-0.239041	0.01	0.01	1	ENSMUST00000188320	ENSMUSG00000100146	lincRNA	exon	chr9-120913774-120914090	104655
1700020M21Rik	chr9-120826070-120826570	0.913968	0.279622	0.02	0.016	1	ENSMUST00000188320	ENSMUSG00000100146	lincRNA	exon	chr9-120913774-120914090	87203
1700020M21Rik	chr9-120830472-120830972	0.000819081	0.938344	0.03	0.016	1	ENSMUST00000188320	ENSMUSG00000100146	lincRNA	exon	chr9-120913774-120914090	82801
1700020M21Rik	chr9-120851908-120852408	0.687633	0.340219	0.032	0.025	1	ENSMUST00000188320	ENSMUSG00000100146	lincRNA	exon	chr9-120913774-120914090	61365
1700020M21Rik	chr9-120852444-120852944	0.996904	0.253203	0.147	0.127	1	ENSMUST00000188320	ENSMUSG00000100146	lincRNA	exon	chr9-120913774-120914090	60829
1700020M21Rik	chr9-120866587-120867087	0.982695	0.258881	0.039	0.031	1	ENSMUST00000188320	ENSMUSG00000100146	lincRNA	exon	chr9-120913774-120914090	46686
1700020M21Rik	chr9-120868410-120868910	0.00120977	0.968246	0.027	0.013	1	ENSMUST00000188320	ENSMUSG00000100146	lincRNA	exon	chr9-120913774-120914090	44863
1700020M21Rik	chr9-120914336-120914836	0.0220119	0.716316	0.034	0.023	1	ENSMUST00000188320	ENSMUSG00000100146	lincRNA	gap	chr9-120914471-120915214	0
1700020M21Rik	chr9-120914961-120915461	0.329395	0.337962	0.138	0.11	1	ENSMUST00000188320	ENSMUSG00000100146	lincRNA	gap	chr9-120914471-120915214	0
1700020M21Rik	chr9-120770052-120770552	0.658206	0.205412	0.15	0.131	1	ENSMUST00000188320	ENSMUSG00000100146	lincRNA	exon	chr9-120913774-120914090	143221
1700020M21Rik	chr9-120781791-120782291	0.838326	0.22737	0.024	0.018	1	ENSMUST00000188320	ENSMUSG00000100146	lincRNA	exon	chr9-120913774-120914090	131482
1700020N01Rik	chr10-21538404-21538904	6.89541e-06	1.20057	0.035	0.017	1	ENSMUST00000057341	ENSMUSG00000050844	protein_coding	exon	chr10-21593145-21593234	54240
1700020N01Rik	chr10-21544720-21545220	0.245515	0.621366	0.018	0.009	1	ENSMUST00000057341	ENSMUSG00000050844	protein_coding	exon	chr10-21593145-21593234	47924
1700020N01Rik	chr10-21545451-21545951	0.497557	0.30112	0.175	0.145	1	ENSMUST00000057341	ENSMUSG00000050844	protein_coding	exon	chr10-21593145-21593234	47193
1700020N01Rik	chr10-21573630-21574130	0.176779	0.149181	0.049	0.045	1	ENSMUST00000057341	ENSMUSG00000050844	protein_coding	exon	chr10-21593145-21593234	19014
1700020N01Rik	chr10-21600835-21601335	0.144776	0.498186	0.048	0.034	1	ENSMUST00000057341	ENSMUSG00000050844	protein_coding	gap	chr10-21593573-21621645	0
1700020N01Rik	chr10-21618720-21619220	0.0510525	-0.157559	0.021	0.022	1	ENSMUST00000186635	ENSMUSG00000050844	protein_coding	gap	chr10-21616394-21621645	0
1700020N01Rik	chr10-21628410-21628910	1.74807e-05	-0.353691	0.037	0.044	1	ENSMUST00000057341	ENSMUSG00000050844	protein_coding	utr	chr10-21621726-21622376	6033
1700020N01Rik	chr10-21636670-21637170	0.0114807	-0.263852	0.025	0.028	1	ENSMUST00000057341	ENSMUSG00000050844	protein_coding	utr	chr10-21621726-21622376	14293
1700020N01Rik	chr10-21653349-21653849	0.0131418	0.802576	0.022	0.012	1	ENSMUST00000057341	ENSMUSG00000050844	protein_coding	utr	chr10-21621726-21622376	30972
1700021A07Rik	chr10-21419091-21419591	0.00337894	-0.64564	0.008	0.011	1	ENSMUST00000188024	ENSMUSG00000037535	lincRNA	gap	chr10-21419519-21425303	0
1700021A07Rik	chr10-21426426-21426926	0.817141	0.297996	0.021	0.017	1	ENSMUST00000188024	ENSMUSG00000037535	lincRNA	exon	chr10-21426418-21426565	0
1700021A07Rik	chr10-21465318-21465818	0.470102	0.391239	0.057	0.045	1	ENSMUST00000188024	ENSMUSG00000037535	lincRNA	exon	chr10-21426418-21426565	38752
1700021F05Rik	chr10-43540732-43541232	6.503e-05	0.443791	0.288	0.217	1	ENSMUST00000147196	ENSMUSG00000019797	protein_coding	utr	chr10-43540940-43540968	0
1700021F07Rik	chr2-173546279-173546779	0.205684	0.139884	0.04	0.036	1	ENSMUST00000029023	ENSMUSG00000027518	protein_coding	utr	chr2-173528345-173528501	17777
1700021K19Rik	chr16-32821954-32822454	0.319702	0.152949	0.125	0.121	1	ENSMUST00000115105	ENSMUSG00000035629	protein_coding	utr	chr16-32821703-32823967	0
1700021K19Rik	chr16-32853415-32853915	9.21991e-05	0.733398	0.088	0.055	1	ENSMUST00000119810	ENSMUSG00000035629	protein_coding	gap	chr16-32849762-32856891	0
1700021K19Rik	chr16-32864348-32864848	0.00549585	0.812846	0.028	0.017	1	ENSMUST00000149621	ENSMUSG00000035629	protein_coding	gap	chr16-32861618-32868092	0
1700021K19Rik	chr16-32868146-32868646	0.000796716	0.457106	0.216	0.167	1	ENSMUST00000115105	ENSMUSG00000035629	protein_coding	cds	chr16-32868093-32868160	0
1700021P04Rik	chr19-24054230-24054730	0.092811	0.899594	0.011	0.006	1	ENSMUST00000178667	ENSMUSG00000096796	protein_coding	exon	chr19-24064793-24064998	10062
1700021P04Rik	chr19-24054975-24055475	3.52309e-05	-0.516595	0.022	0.032	1	ENSMUST00000178667	ENSMUSG00000096796	protein_coding	exon	chr19-24064793-24064998	9317
1700022H16Rik	chr12-9569845-9570345	0.667851	0.423292	0.013	0.011	1	ENSMUST00000188935	ENSMUSG00000099360	lincRNA	gap	chr12-9565570-9570205	0
1700022I11Rik	chr4-42965263-42965763	0.903412	0.318945	0.05	0.039	1	ENSMUST00000189414	ENSMUSG00000028451	protein_coding	exon	chr4-42969604-42969652	3840
1700023C21Rik	chr11-109859810-109860310	0.0609315	-0.251151	0.012	0.012	1	ENSMUST00000143247	ENSMUSG00000087393	lincRNA	exon	chr11-109848317-109848476	11333
1700023C21Rik	chr11-109860548-109861048	0.274202	0.190609	0.076	0.069	1	ENSMUST00000143247	ENSMUSG00000087393	lincRNA	exon	chr11-109848317-109848476	12071
1700023C21Rik	chr11-109863273-109863773	0.618878	0.22775	0.016	0.014	1	ENSMUST00000143247	ENSMUSG00000087393	lincRNA	exon	chr11-109848317-109848476	14796
1700023E05Rik	chr5-77015759-77016259	0.59879	0.208058	0.087	0.076	1	ENSMUST00000117880	ENSMUSG00000029248	protein_coding	cds	chr5-77016152-77016638	0
1700023E05Rik	chr5-77029694-77030194	0.0513518	-0.251133	0.013	0.014	1	ENSMUST00000117880	ENSMUSG00000029248	protein_coding	gap	chr5-77016639-77042095	0
1700023E05Rik	chr5-77061314-77061814	0.680204	0.199967	0.026	0.023	1	ENSMUST00000117880	ENSMUSG00000029248	protein_coding	utr	chr5-77061417-77061529	0
1700023L04Rik	chr6-29985060-29985560	0.0519834	0.394159	0.202	0.155	1	ENSMUST00000141679	ENSMUSG00000045709	lincRNA	gap	chr6-29985467-29993011	0
1700023L04Rik	chr6-29985778-29986278	0.828327	0.388097	0.012	0.009	1	ENSMUST00000141679	ENSMUSG00000045709	lincRNA	gap	chr6-29985467-29993011	0
1700024P04Rik	chr13-98955172-98955672	0.692938	0.204697	0.015	0.014	1	ENSMUST00000054425	ENSMUSG00000045022	protein_coding	utr	chr13-98984085-98984144	28412
[truncated: 90,887 more rows]

## Sheet: DA_GO_Endothelial cells
Category	Term	Count	%	PValue	Genes	List Total	Pop Hits	Pop Total	Fold Enrichment	Bonferroni	Benjamini	FDR
[truncated: 511 more rows]

[truncated: 5 more sheets: DA_Microglia, DA_GO_Microglia, DA_Neuron, DA_Oligodendrocytes, peak-gene-heatmap]
