# Supplementary material for: Decoding the Effects of Bexarotene treatment on brain of AD-like model mice: Single-Cell Transcriptomics and Chromatin Accessibility Analysis
Source: Research Square preprint supplement (doi:10.21203/rs.3.rs-7201032/v1), 2025-08-13
Supplement: Supplementary file 3 [file 74954555a56c453f4b86dd32.xlsx]

## Sheet: Col names description
Table name	Description
CHIP-seq_peak	Enriched peaks identified between the bexarotene treatment and control groups using the CHIP-seq dataset.
ATAC-seq_TFBS	Enriched transcription factor binding sites between the bexarotene-treated and control groups identified via snATAC-seq.
Overlapping_peak	Peaks that are enriched in both the CHIP-seq and ATAC-seq datasets.
overlapping_peaks_for_CHIP	Peaks in the CHIP-seq dataset that overlap with ATAC-seq peaks.
overlapping_peaks_for_ATAC	Peaks in the ATAC-seq dataset that overlap with CHIP-seq peaks.
OV_peaks_annotation	Annotation of overlapping peaks to determine whether the corresponding genes encode transcription factors.
OV_TFs_MEME_analysis	Identification of motifs binding to sequences corresponding to genes that encode transcription factors.
OV_TFs_FIMO	FIMO (Find Individual Motif Occurrences) analysis of overlapping peaks
Column names for the 'Overlapping_peak' sheet	Description
CHIP_peak_chr	Chromosome where the ChIP-Seq peak is located.
CHIP_peak_start	Start position of the ChIP-Seq peak.
CHIP_peak_end	End position of the ChIP-Seq peak.
ATAC_TFBS_chr	Chromosome where the TFBS (predicted from ATAC-Seq) is located.
ATAC_TFBS_start	Start position of the TFBS.
ATAC_TFBS_end	End position of the TFBS.
ATAC_TFBS_name	Name or identifier of the transcription factor binding site.
ATAC_TFBS_score	Score indicating the confidence or strength of the TFBS prediction.
ATAC_TFBS_strand	DNA strand (+ or –) on which the TFBS is located.
ATAC_peak_chr	Chromosome where the ATAC-Seq peak is located (longer than TFBS).
ATAC_peak_start	Start position of the ATAC-Seq peak.
ATAC_peak_end	End position of the ATAC-Seq peak.
ATAC_peak_id	Unique identifier for the ATAC-Seq peak.
ATAC_feature	Type of genomic feature overlapping the ATAC peak (e.g., exon, intron, promoter, gene), we only select the gene.
ATAC_feat_start	Start position of the annotation feature.
ATAC_feat_end	End position of the annotation feature.
ATAC_feat_strand	Strand (+ or –) of the annotation feature.
ATAC_feat_anchor	Reference point of the feature (e.g., center, start, end) used for distance calculation.
ATAC_distance	The distance form the ATAC peak to feature anchor point.
ATAC_relative_location	Positional relationship of the ATAC peak to the feature (e.g., upstream, downstream, overlapstart).
ATAC_feat_ovl_peak	Proportion or extent of the feature that overlaps with the ATAC peak.
ATAC_peak_ovl_feat	Proportion or extent of the ATAC peak that overlaps with the feature
ATAC_ID	Unique identifier for the ATAC-feature overlap event.
ATAC_gene_id	Ensembl ID of the gene associated with the feature.
ATAC_gene_name	Human-readable name of the gene.
ATAC_gene_status	Gene status (e.g., known, novel, predicted, we selected the known gene.).
ATAC_gene_type	Gene biotype (e.g., protein_coding, lncRNA, pseudogene, we selected the ).

## Sheet: CHIP-seq_peak
CHIP_peak_chr	CHIP_peak_start	CHIP_peak_end
chr1	4788421	4788470
chr1	4878587	4878636
chr1	5164894	5164943
chr1	6244936	6244985
chr1	6392707	6392756
chr1	9581058	9581107
chr1	9681176	9681225
chr1	9686412	9686461
chr1	9723196	9723245
chr1	9732008	9732057
chr1	9922491	9922540
chr1	9923655	9923704
chr1	9926281	9926330
chr1	10032528	10032577
chr1	10088538	10088587
chr1	10181650	10181750
chr1	11696153	11696202
chr1	11971810	11971859
chr1	13139528	13139577
chr1	13141175	13141224
chr1	13579452	13579517
chr1	13591907	13591956
chr1	13657615	13657664
chr1	13706493	13706542
chr1	14875001	14875050
chr1	14923780	14923860
chr1	16075121	16075170
chr1	16098422	16098471
chr1	16669285	16669334
chr1	16692349	16692398
chr1	16961097	16961146
chr1	17161305	17161354
chr1	17764421	17764520
chr1	18254757	18254806
chr1	19164480	19164529
chr1	19220710	19220759
chr1	19240006	19240055
chr1	20618039	20618088
chr1	20737255	20737304
chr1	20812794	20812843
chr1	21034419	21034468
chr1	21346956	21347005
chr1	21401316	21401447
chr1	23367403	23367452
chr1	23844057	23844106
chr1	23926768	23926821
chr1	24177485	24177534
chr1	24582468	24582517
chr1	25065935	25065984
chr1	25444478	25444551
chr1	25445646	25445695
chr1	31132597	31132646
chr1	31191912	31191961
chr1	32169438	32169542
chr1	33453758	33453807
chr1	33454823	33454881
chr1	33560843	33560892
chr1	33562215	33562264
chr1	33790148	33790197
chr1	33792634	33792685
chr1	33911331	33911380
chr1	34463829	34463900
chr1	34507501	34507550
chr1	34552919	34552978
chr1	34817687	34817736
chr1	34869405	34869530
chr1	34875202	34875251
chr1	36089336	36089385
chr1	36091716	36091765
chr1	36108760	36108809
chr1	36318237	36318339
chr1	36445482	36445531
chr1	36448468	36448517
chr1	36489987	36490036
chr1	36543874	36543926
chr1	36627379	36627428
chr1	36734910	36734965
chr1	36863117	36863166
chr1	37216143	37216192
chr1	37423563	37423612
chr1	37495071	37495135
chr1	37809449	37809560
chr1	37878160	37878209
chr1	37885470	37885519
chr1	37981321	37981370
chr1	38798364	38798413
chr1	38863490	38863539
chr1	38897033	38897082
chr1	39359047	39359096
chr1	39359259	39359308
chr1	39547074	39547123
chr1	39634350	39634399
chr1	39638502	39638551
chr1	39694700	39694749
chr1	39902015	39902064
chr1	40029424	40029518
chr1	40228396	40228499
chr1	40346894	40347014
chr1	40428681	40428730
chr1	40461494	40461543
chr1	40470451	40470576
chr1	40534305	40534405
chr1	40555435	40555484
chr1	40579781	40579830
chr1	40781204	40781286
chr1	42850517	42850566
chr1	42854819	42854868
chr1	42901389	42901438
chr1	42902656	42902705
chr1	43789180	43789229
chr1	43934722	43934771
chr1	44052632	44052681
chr1	44082197	44082246
chr1	45307629	45307688
chr1	45372196	45372245
chr1	45799818	45799904
chr1	45804604	45804653
chr1	45888294	45888407
chr1	45908839	45908888
chr1	46220929	46220978
chr1	46222871	46222920
chr1	46428977	46429026
chr1	51302110	51302159
chr1	51305779	51305828
chr1	51468852	51468901
chr1	52102384	52102433
chr1	52106794	52106862
chr1	52203039	52203088
chr1	52455146	52455249
chr1	52482098	52482147
chr1	52725236	52725285
chr1	52878925	52878974
chr1	52886849	52886898
chr1	52966398	52966462
chr1	52968995	52969044
chr1	53305096	53305145
chr1	53755962	53756011
chr1	53783915	53783964
chr1	54253614	54253663
chr1	54398705	54398755
chr1	54421954	54422003
chr1	54468141	54468190
chr1	54515048	54515160
chr1	54647001	54647050
chr1	54790748	54790812
chr1	54927188	54927237
chr1	54986769	54986818
chr1	55139623	55139672
chr1	55169542	55169591
chr1	55308694	55308743
chr1	56640852	56640901
chr1	57774285	57774334
chr1	57859981	57860045
chr1	57986941	57987027
chr1	58024097	58024146
chr1	58206368	58206417
chr1	58446778	58446832
chr1	58462220	58462269
chr1	58479347	58479396
chr1	58520213	58520262
chr1	58672971	58673020
chr1	58793481	58793530
chr1	58823721	58823770
chr1	58974403	58974500
chr1	59093813	59093862
chr1	59105093	59105142
chr1	59109207	59109302
chr1	59197384	59197433
chr1	59302385	59302434
chr1	59578756	59578805
chr1	59666108	59666157
chr1	59816638	59816687
chr1	60122926	60122975
chr1	60123249	60123298
chr1	60445335	60445384
chr1	60524445	60524494
chr1	60980237	60980286
chr1	61641217	61641347
chr1	63146487	63146536
chr1	63593502	63593551
chr1	63696677	63696773
chr1	63697593	63697642
chr1	63709609	63709658
chr1	63713513	63713562
chr1	63730804	63730853
chr1	63739022	63739071
chr1	64125151	64125200
chr1	64126036	64126085
chr1	64603635	64603684
chr1	64870430	64870500
chr1	65065525	65065574
chr1	65072953	65073002
chr1	65102583	65102691
chr1	65340154	65340203
chr1	65390717	65390766
chr1	66587478	66587527
chr1	66705064	66705152
chr1	68568889	68568938
chr1	69609798	69609847
chr1	69613236	69613285
chr1	69687695	69687744
chr1	71242550	71242599
chr1	71559077	71559126
chr1	71579116	71579165
chr1	72269227	72269276
chr1	72299948	72299997
chr1	72302170	72302219
chr1	72354373	72354422
chr1	72393340	72393389
chr1	72609561	72609610
chr1	72672657	72672706
chr1	72835839	72835888
chr1	74146393	74146478
chr1	74156760	74156809
chr1	74234914	74234995
chr1	74252633	74252682
chr1	74252753	74252802
chr1	74257084	74257170
chr1	74435063	74435112
chr1	74509093	74509142
chr1	74575502	74575551
chr1	74686601	74686650
chr1	74919675	74919724
chr1	75127958	75128007
chr1	75170874	75170923
chr1	75215084	75215181
chr1	75320144	75320193
chr1	75360462	75360511
chr1	75406442	75406491
chr1	75459092	75459141
chr1	75489559	75489608
chr1	75545388	75545437
chr1	77365784	77365833
chr1	77436815	77436899
chr1	78312091	78312140
chr1	78711555	78711604
chr1	79444107	79444156
chr1	79644040	79644089
chr1	79670409	79670458
chr1	79701483	79701532
chr1	79793381	79793430
chr1	79794742	79794791
chr1	79825937	79825986
chr1	80207878	80207936
chr1	80215685	80215734
chr1	80264379	80264428
chr1	80269099	80269148
chr1	80304403	80304452
chr1	80340599	80340648
chr1	82238558	82238674
chr1	82516635	82516684
chr1	82757166	82757215
chr1	82770409	82770458
chr1	82898390	82898439
chr1	83022378	83022427
chr1	83115859	83115917
chr1	83182443	83182492
chr1	84035334	84035383
chr1	84201061	84201110
chr1	84531751	84531864
chr1	84532738	84532790
chr1	84782501	84782588
chr1	84872691	84872740
chr1	84904018	84904067
chr1	85846869	85846931
chr1	85894635	85894782
chr1	85906461	85906510
chr1	85911987	85912044
chr1	85944032	85944081
chr1	86020092	86020141
chr1	86027156	86027228
chr1	86031415	86031464
chr1	86041552	86041601
chr1	86146268	86146317
chr1	86218519	86218568
chr1	86305519	86305568
chr1	86388039	86388138
chr1	86389815	86389874
chr1	86390885	86390934
chr1	86429152	86429201
chr1	86544507	86544556
chr1	86587038	86587087
chr1	86591486	86591535
chr1	87045293	87045342
chr1	87049385	87049434
chr1	87090130	87090179
chr1	87153383	87153503
chr1	87198566	87198615
chr1	87203223	87203272
chr1	87245322	87245371
chr1	87397736	87397818
chr1	87506521	87506570
chr1	87506936	87506985
chr1	87507213	87507279
chr1	87558155	87558222
chr1	87574249	87574298
chr1	87804650	87804711
chr1	87848979	87849028
chr1	88158641	88158690
chr1	88333925	88334030
chr1	88413028	88413077
chr1	88416136	88416206
chr1	88701114	88701163
chr1	89156613	89156662
chr1	89458814	89458863
chr1	89898250	89898299
chr1	89981281	89981330
chr1	90199642	90199703
chr1	90600743	90600822
chr1	90954087	90954136
chr1	90971924	90971973
chr1	91062350	91062399
chr1	91065040	91065089
chr1	91154075	91154167
chr1	91155098	91155147
chr1	91166652	91166701
chr1	91183210	91183259
chr1	91268124	91268173
chr1	91290747	91290796
chr1	91557716	91557765
chr1	91844803	91844852
chr1	92056674	92056723
chr1	92435598	92435647
chr1	92490719	92490768
chr1	92509072	92509121
chr1	92948587	92948636
chr1	92953994	92954043
chr1	92972009	92972058
chr1	92989898	92989947
chr1	93054117	93054166
chr1	93232171	93232220
chr1	93235995	93236044
chr1	93324510	93324594
chr1	93342031	93342080
chr1	93388003	93388093
chr1	93439115	93439164
chr1	93445618	93445667
chr1	93496633	93496682
chr1	93512107	93512156
chr1	93691018	93691109
chr1	93773334	93773383
chr1	93806204	93806253
chr1	93813978	93814027
chr1	94030896	94030972
chr1	96876581	96876630
chr1	97664469	97664518
chr1	97740465	97740557
chr1	97741520	97741569
chr1	97777959	97778036
chr1	97784449	97784511
chr1	97789756	97789805
chr1	98098696	98098793
chr1	104993518	104993567
chr1	105272458	105272507
chr1	105589418	105589467
chr1	105661142	105661191
chr1	106031867	106031916
chr1	106033116	106033165
chr1	106036188	106036237
chr1	106765450	106765499
chr1	106775918	106775967
chr1	106783551	106783600
chr1	106931600	106931649
chr1	106947021	106947070
chr1	106999357	106999431
chr1	107043086	107043135
chr1	107212506	107212555
chr1	107378589	107378638
chr1	107381027	107381076
chr1	107448667	107448716
chr1	107450828	107450877
chr1	107589571	107589620
chr1	107614400	107614449
chr1	110891768	110891817
chr1	111854328	111854377
chr1	116585619	116585668
chr1	116824434	116824483
chr1	117700366	117700415
chr1	117965345	117965394
chr1	117987148	117987206
chr1	118324497	118324654
chr1	118328845	118328894
chr1	118946615	118946664
chr1	119049331	119049380
chr1	119921940	119921989
chr1	120117845	120117894
chr1	120607198	120607247
chr1	121510426	121510475
chr1	121519025	121519074
chr1	124045431	124045511
chr1	125418625	125418674
chr1	125433499	125433548
chr1	125675145	125675194
chr1	125776468	125776517
chr1	127202446	127202495
chr1	127349564	127349613
chr1	127586718	127586767
chr1	127793459	127793508
chr1	127809239	127809288
chr1	127852763	127852812
chr1	127911260	127911309
chr1	127947756	127947805
chr1	128280937	128280986
chr1	128284308	128284357
chr1	128324618	128324670
chr1	128324881	128324930
chr1	128347679	128347728
chr1	128414276	128414325
chr1	128586152	128586203
chr1	130669702	130669751
chr1	130704631	130704680
chr1	130716659	130716708
chr1	130738831	130738880
chr1	130929891	130929940
chr1	131016189	131016238
chr1	131074741	131074790
chr1	131148903	131148958
chr1	131152685	131152736
chr1	131179631	131179680
chr1	131188224	131188273
chr1	131243813	131243862
chr1	131254795	131254844
chr1	131275013	131275062
chr1	131641236	131641328
chr1	131654755	131654804
chr1	131699185	131699234
chr1	131807532	131807589
chr1	131817815	131817864
chr1	131938166	131938215
chr1	131978516	131978565
chr1	132008862	132008911
chr1	132117188	132117237
chr1	132333272	132333345
chr1	132414119	132414168
chr1	132420275	132420324
chr1	132487904	132487953
chr1	132559895	132559944
chr1	132657623	132657672
chr1	132881059	132881108
chr1	133181006	133181055
chr1	133348097	133348146
chr1	133350845	133350907
chr1	133602937	133603010
chr1	133608229	133608278
chr1	133637461	133637510
chr1	133643106	133643155
chr1	133643740	133643835
chr1	133656519	133656568
chr1	134154337	134154386
chr1	134318784	134318833
chr1	134332697	134332746
chr1	134346220	134346269
chr1	134498896	134498945
chr1	134509291	134509377
chr1	134559694	134559743
chr1	134634633	134634710
chr1	134963391	134963440
chr1	134986150	134986199
chr1	135046031	135046080
chr1	135137174	135137267
chr1	135171509	135171558
chr1	135276520	135276569
chr1	135293442	135293491
chr1	135295945	135295994
chr1	135319961	135320010
chr1	135373579	135373681
chr1	135517493	135517542
chr1	135717289	135717338
chr1	135751428	135751477
chr1	135813850	135813899
chr1	136053956	136054005
chr1	136443300	136443349
chr1	136838911	136838960
chr1	138059874	138059946
chr1	138063428	138063477
chr1	138114840	138114889
chr1	138118333	138118382
chr1	138119196	138119245
chr1	138281919	138281968
chr1	138290561	138290610
chr1	138617104	138617153
chr1	138617896	138617945
chr1	139372361	139372410
chr1	139435850	139435899
chr1	139475784	139475833
chr1	139490208	139490257
chr1	140247214	140247298
chr1	140610905	140610954
chr1	143707137	143707186
chr1	143789702	143789751
chr1	144160111	144160160
chr1	144172670	144172719
chr1	144173149	144173198
chr1	144242604	144242653
chr1	144244559	144244608
chr1	144539811	144539860
chr1	150418515	150418564
chr1	150456268	150456317
chr1	150461117	150461166
chr1	150466891	150466956
chr1	150563820	150563869
chr1	151353813	151353863
chr1	151360546	151360595
chr1	151851744	151851793
chr1	152091888	152091937
chr1	152381684	152381733
chr1	152385973	152386022
chr1	152754779	152754828
chr1	152758988	152759037
chr1	152774272	152774321
chr1	152823096	152823145
chr1	152839066	152839115
chr1	153181847	153181896
chr1	153473813	153473862
chr1	153475623	153475672
chr1	153489974	153490023
chr1	153506185	153506234
chr1	153525936	153525985
chr1	153848209	153848258
chr1	153872259	153872308
chr1	153901191	153901240
chr1	153910752	153910801
chr1	154199913	154199962
chr1	154393683	154393745
chr1	154639482	154639531
chr1	155155142	155155191
chr1	155343849	155343898
chr1	155417112	155417161
chr1	155558141	155558190
chr1	155624759	155624852
chr1	155691802	155691851
chr1	155692417	155692478
chr1	155849828	155849918
chr1	155913213	155913262
chr1	155969673	155969722
chr1	156067580	156067629
chr1	156367934	156367983
chr1	156450956	156451005
chr1	156525183	156525232
chr1	156666955	156667004
chr1	156675725	156675774
chr1	156805092	156805141
chr1	157472357	157472458
chr1	157532879	157533001
chr1	157538532	157538581
chr1	157539561	157539610
chr1	157541888	157541937
chr1	157569923	157569972
chr1	158305533	158305582
chr1	158524923	158524972
chr1	158982001	158982107
chr1	159291336	159291385
chr1	159350406	159350497
chr1	159723998	159724047
chr1	160149668	160149803
chr1	160903901	160903950
chr1	160980916	160980965
chr1	161105023	161105072
chr1	161146180	161146229
chr1	161253640	161253689
chr1	161397081	161397130
chr1	161874499	161874571
chr1	161944243	161944292
chr1	162644098	162644147
chr1	162670256	162670305
chr1	162700688	162700737
chr1	162848811	162848860
chr1	162887474	162887523
chr1	162897096	162897181
chr1	163055878	163055927
chr1	163085985	163086056
chr1	163317603	163317652
chr1	163727272	163727321
chr1	163918936	163918985
chr1	163930747	163930838
chr1	164063301	164063350
chr1	164064572	164064621
chr1	164264719	164264768
chr1	164800184	164800233
chr1	165177323	165177417
chr1	165186387	165186436
chr1	165211092	165211141
chr1	165215916	165216014
chr1	165220114	165220163
chr1	165308622	165308671
chr1	165324208	165324257
chr1	165461163	165461212
chr1	165481900	165482076
chr1	165760853	165760902
chr1	165930234	165930283
chr1	166147065	166147165
chr1	166150117	166150237
chr1	166258168	166258217
chr1	166400902	166400951
chr1	166672286	166672335
chr1	167218291	167218340
chr1	167332253	167332302
chr1	167351742	167351791
chr1	167358244	167358346
chr1	167372615	167372664
chr1	167460036	167460085
chr1	167462842	167462937
chr1	167693218	167693267
chr1	168276181	168276230
chr1	169493363	169493412
chr1	169652626	169652675
chr1	169962717	169962766
chr1	169968261	169968310
chr1	170155302	170155351
chr1	170189858	170189907
chr1	170247522	170247576
chr1	170301269	170301318
chr1	170664845	170664894
chr1	170708914	170708963
chr1	171150027	171150076
chr1	171156958	171157066
chr1	171193973	171194022
chr1	171197339	171197388
chr1	171230846	171230895
chr1	171290163	171290212
chr1	171292843	171292892
chr1	171400926	171401007
chr1	171505815	171505864
chr1	171523499	171523580
chr1	171528374	171528423
chr1	171528918	171528967
chr1	171609693	171609749
chr1	171693087	171693136
chr1	171770293	171770342
chr1	171788398	171788447
chr1	171800539	171800588
chr1	171843159	171843208
chr1	171844234	171844283
chr1	171891634	171891737
chr1	171939011	171939060
chr1	172030046	172030095
chr1	172175852	172175901
chr1	172297376	172297425
chr1	172337453	172337502
chr1	172341942	172341991
chr1	172362365	172362414
chr1	172370702	172370751
chr1	172381849	172381898
chr1	172383286	172383340
chr1	172503441	172503490
chr1	172503606	172503655
chr1	172635067	172635116
chr1	172763554	172763603
chr1	172896366	172896470
chr1	173198582	173198631
chr1	173222750	173222799
chr1	173282434	173282559
chr1	173364815	173364864
chr1	173365731	173365780
chr1	173568806	173568855
chr1	173570741	173570790
chr1	173583373	173583422
chr1	173674883	173674932
chr1	174069518	174069567
chr1	174098344	174098393
chr1	174137763	174137812
chr1	174213144	174213233
chr1	174325867	174325918
chr1	174423896	174424095
chr1	174427099	174427148
chr1	174452628	174452677
chr1	175598267	175598316
chr1	175623004	175623053
chr1	175645495	175645568
chr1	175680500	175680612
chr1	175682435	175682484
chr1	175895188	175895237
chr1	175975693	175975742
chr1	176270582	176270685
chr1	176811748	176811804
chr1	177138313	177138362
chr1	177439809	177439858
chr1	177733161	177733210
chr1	177777597	177777646
chr1	177797205	177797278
chr1	178937917	178938029
chr1	178952880	178952929
chr1	179548742	179548791
chr1	180061767	180061816
chr1	180162859	180162961
chr1	180179249	180179298
chr1	180437042	180437091
chr1	180484707	180484756
chr1	180573316	180573365
chr1	180643912	180643961
chr1	180729752	180729801
chr1	180870650	180870699
chr1	180889815	180889864
chr1	180904160	180904209
chr1	180930661	180930733
chr1	181085789	181085838
chr1	181144207	181144263
chr1	181169763	181169857
chr1	181815226	181815275
chr1	181833985	181834034
chr1	181895980	181896029
chr1	181959997	181960046
chr1	181960135	181960184
chr1	182121594	182121655
chr1	182124492	182124541
chr1	182125853	182125902
chr1	182460389	182460438
chr1	182952857	182952906
chr1	183280989	183281038
chr1	183284233	183284282
chr1	183288467	183288516
chr1	183299509	183299563
chr1	183306317	183306371
chr1	183312868	183312917
chr1	183313099	183313165
chr1	183323076	183323125
chr1	183389912	183389961
chr1	183390762	183390811
chr1	183397177	183397226
chr1	183401989	183402038
chr1	183402923	183402972
chr1	184034906	184034955
chr1	184783971	184784020
chr1	184897371	184897420
chr1	184950444	184950493
chr1	185288827	185288881
chr1	185327116	185327165
chr1	185425015	185425064
chr1	186099336	186099388
chr1	186104100	186104159
chr1	186664436	186664485
chr1	186970514	186970583
chr1	187039933	187039982
chr1	187133714	187133763
chr1	187220249	187220298
chr1	187279021	187279096
chr1	187282842	187282891
chr1	188992906	188992993
chr1	189301721	189301770
chr1	189664545	189664594
chr1	189804339	189804388
chr1	190117428	190117477
chr1	190148181	190148230
chr1	190810305	190810354
chr1	190810927	190810976
chr1	190911964	190912013
chr1	190922683	190922732
chr1	190925559	190925608
chr1	190977780	190977829
chr1	191085368	191085417
chr1	191097368	191097448
chr1	191107976	191108025
chr1	191111865	191111914
chr1	191342097	191342174
chr1	191552968	191553017
chr1	191623930	191624024
chr1	191714591	191714640
chr1	191780346	191780395
chr1	192114899	192114948
chr1	192637219	192637268
chr1	192771952	192772001
chr1	193152367	193152493
chr1	193154322	193154371
chr1	193210664	193210745
chr1	193263228	193263277
chr1	193277228	193277277
chr1	194935339	194935388
chr1	194959978	194960027
chr1	195097838	195097887
chr10	3413786	3413835
chr10	3419986	3420035
chr10	3547694	3547743
chr10	3966689	3966738
chr10	4075066	4075115
chr10	4356092	4356163
chr10	4370988	4371037
chr10	4478435	4478484
chr10	5286383	5286432
chr10	6755449	6755524
chr10	6756583	6756632
chr10	6760530	6760579
chr10	7033902	7033951
chr10	7119987	7120036
chr10	7163839	7163888
chr10	7821768	7821817
chr10	7829797	7829846
chr10	7855839	7855911
chr10	7902639	7902732
chr10	7925961	7926010
chr10	7933393	7933442
chr10	8205013	8205062
chr10	8205328	8205377
chr10	8719279	8719328
chr10	8800682	8800731
chr10	9527536	9527611
chr10	9528527	9528576
chr10	11078515	11078564
chr10	11087128	11087177
chr10	11147710	11147759
chr10	11187287	11187336
chr10	11291362	11291411
chr10	12954282	12954331
chr10	12956742	12956791
chr10	13131748	13131797
chr10	13147476	13147525
chr10	13642660	13642709
chr10	14541310	14541359
chr10	14684265	14684314
chr10	17903601	17903657
chr10	18588209	18588258
chr10	18856451	18856500
chr10	19591502	19591551
chr10	19620191	19620253
chr10	19628818	19628867
chr10	20039577	20039626
chr10	20137816	20137865
chr10	20306291	20306340
chr10	20339980	20340029
chr10	20394729	20394846
chr10	20397199	20397248
chr10	20955540	20955589
chr10	21125347	21125396
chr10	21297312	21297361
chr10	21336440	21336489
chr10	21388750	21388799
chr10	21625849	21625898
chr10	22002451	22002500
chr10	22643055	22643104
chr10	22649827	22649876
chr10	22720160	22720209
chr10	23784612	23784661
chr10	23796810	23796859
chr10	23910159	23910208
chr10	23954555	23954604
chr10	24026684	24026733
chr10	24079218	24079267
chr10	24595450	24595499
chr10	24596078	24596127
chr10	25164460	25164509
chr10	25169610	25169659
chr10	25305934	25306076
chr10	25528901	25528950
chr10	25990256	25990305
chr10	26036501	26036550
chr10	26250722	26250771
chr10	26751576	26751666
chr10	26754599	26754648
chr10	28669314	28669363
chr10	28779557	28779606
chr10	28888421	28888470
chr10	28974758	28974807
chr10	29172283	29172332
chr10	29195474	29195531
chr10	29211062	29211161
chr10	29233081	29233130
chr10	29492421	29492476
chr10	29498224	29498273
chr10	30532992	30533041
chr10	30599810	30599859
chr10	30614830	30614879
chr10	30840140	30840189
chr10	31311835	31311884
chr10	31332543	31332592
chr10	31492869	31492918
chr10	31553678	31553727
chr10	31605895	31605944
chr10	31610481	31610592
chr10	31687002	31687051
chr10	32888485	32888534
chr10	32891188	32891237
chr10	32891782	32891831
chr10	33280852	33280901
chr10	33778746	33778800
chr10	33781863	33781923
chr10	33783131	33783180
chr10	33867070	33867119
chr10	33914275	33914340
chr10	34040018	34040067
chr10	34151380	34151429
chr10	34153094	34153143
chr10	34284141	34284190
chr10	34301153	34301202
chr10	34304541	34304590
chr10	34390836	34390889
chr10	34396312	34396361
chr10	34613888	34613937
chr10	39108360	39108409
chr10	39155052	39155101
chr10	39369291	39369362
chr10	39807631	39807693
chr10	39890579	39890628
chr10	39897316	39897374
chr10	40083286	40083335
chr10	40230307	40230356
chr10	40233670	40233719
chr10	40247289	40247338
chr10	40479463	40479512
chr10	41067062	41067111
chr10	41300949	41300998
chr10	41430175	41430224
chr10	41507240	41507303
chr10	41626447	41626496
chr10	41805215	41805264
chr10	42280566	42280615
chr10	42482944	42483020
chr10	42571972	42572021
chr10	43086152	43086226
chr10	43516376	43516425
chr10	43525801	43525850
chr10	43526573	43526622
chr10	43542789	43542838
chr10	43627530	43627579
chr10	43632125	43632174
chr10	43890773	43890822
chr10	43952813	43952862
chr10	44317248	44317297
chr10	44483527	44483576
chr10	49786345	49786394
chr10	50593334	50593383
chr10	50726547	50726596
chr10	50855448	50855497
chr10	51585402	51585451
chr10	51624357	51624406
chr10	52025137	52025218
chr10	52276520	52276569
chr10	52361926	52361975
chr10	52391226	52391275
chr10	52437559	52437608
chr10	52438481	52438530
chr10	53342594	53342643
chr10	53383121	53383170
chr10	53578646	53578695
chr10	53586362	53586411
chr10	53598876	53598925
chr10	53608590	53608639
chr10	53693128	53693177
chr10	53986384	53986433
chr10	56744393	56744442
chr10	58469835	58469884
chr10	58634117	58634217
chr10	58639079	58639128
chr10	58975331	58975380
chr10	59142084	59142133
chr10	59162213	59162262
chr10	59228440	59228489
chr10	59320497	59320546
chr10	59372115	59372164
chr10	59426102	59426151
chr10	59445198	59445247
chr10	59617899	59617986
chr10	59701305	59701354
chr10	59891362	59891411
chr10	59895378	59895427
chr10	59999269	59999318
chr10	60294573	60294622
chr10	60299963	60300040
chr10	60300802	60300851
chr10	60301747	60301796
chr10	60408129	60408198
chr10	60698282	60698331
chr10	60731709	60731758
chr10	60832815	60832864
chr10	61099162	61099211
chr10	61122282	61122402
chr10	61183993	61184090
chr10	61184586	61184635
chr10	61186454	61186503
chr10	61194837	61194886
chr10	61231614	61231663
chr10	61303902	61304000
chr10	61451038	61451087
chr10	61481017	61481066
chr10	61594870	61594919
chr10	61705271	61705320
chr10	61834081	61834130
chr10	61905941	61905990
chr10	61911208	61911257
chr10	61980375	61980461
chr10	62147624	62147673
chr10	62212274	62212323
chr10	62254617	62254666
chr10	62432249	62432298
chr10	62441106	62441155
chr10	62441446	62441495
chr10	62451652	62451729
chr10	62560513	62560562
chr10	62597317	62597389
chr10	62659454	62659503
chr10	62728527	62728576
chr10	62767472	62767521
chr10	62976052	62976101
chr10	63117032	63117081
chr10	63154921	63154970
chr10	63205577	63205626
chr10	63322500	63322549
chr10	63921111	63921160
chr10	67009040	67009089
chr10	67178848	67178897
chr10	67912403	67912452
chr10	68021751	68021800
chr10	68098011	68098060
chr10	68278285	68278334
chr10	68484902	68484951
chr10	68485578	68485627
chr10	68486617	68486666
chr10	69343065	69343122
chr10	69779077	69779126
chr10	69779758	69779821
chr10	70023193	70023242
chr10	70029264	70029313
chr10	70144459	70144508
chr10	70443754	70443803
chr10	70561262	70561311
chr10	70610706	70610755
chr10	70872459	70872508
chr10	70900240	70900289
chr10	70920785	70920841
chr10	71163308	71163357
chr10	71326667	71326727
chr10	71431356	71431405
chr10	72313554	72313603
chr10	72664488	72664573
chr10	72668492	72668565
chr10	72676895	72676944
chr10	73099444	73099493
chr10	74989612	74989661
chr10	74993892	74993941
chr10	75209531	75209580
chr10	75258695	75258744
chr10	75586717	75586766
chr10	75617434	75617483
chr10	75620328	75620409
chr10	75821654	75821703
chr10	75827891	75827947
chr10	75829768	75829817
chr10	75889223	75889272
chr10	75920274	75920323
chr10	75927701	75927750
chr10	75943465	75943514
chr10	75954437	75954486
chr10	75986180	75986290
chr10	76086102	76086151
chr10	76184314	76184363
chr10	76224395	76224444
chr10	76234247	76234300
chr10	76239772	76239845
chr10	76250955	76251004
chr10	76448215	76448264
chr10	76453114	76453234
chr10	76494922	76494971
chr10	76530387	76530436
chr10	76583176	76583225
chr10	76607203	76607252
chr10	76609528	76609577
chr10	76708011	76708060
chr10	77014029	77014078
chr10	77270334	77270446
chr10	77693672	77693721
chr10	77722171	77722244
chr10	77754882	77754931
chr10	77758702	77758751
chr10	77778040	77778089
chr10	77788245	77788320
chr10	77830872	77830921
chr10	77888962	77889011
chr10	77934552	77934601
chr10	77943938	77944044
chr10	77991030	77991079
chr10	78027088	78027137
chr10	78043726	78043775
chr10	78188926	78188975
chr10	78212370	78212419
chr10	78273684	78273733
chr10	78307417	78307466
chr10	78571665	78571714
chr10	78622743	78622792
chr10	78778815	78778864
chr10	78782566	78782615
chr10	78966385	78966434
chr10	78973998	78974108
chr10	78980284	78980333
chr10	78982156	78982246
chr10	78984127	78984176
chr10	79011622	79011721
chr10	79021308	79021357
chr10	79059926	79059975
chr10	79249026	79249075
chr10	79273640	79273729
chr10	79615282	79615331
chr10	79621014	79621063
chr10	79631827	79631876
chr10	79669347	79669402
chr10	79689458	79689507
chr10	79727213	79727281
chr10	79892205	79892266
chr10	79963486	79963535
chr10	79967474	79967523
chr10	80017004	80017053
chr10	80021034	80021083
chr10	80041024	80041073
chr10	80141987	80142036
chr10	80154117	80154166
chr10	80192356	80192405
chr10	80294241	80294290
chr10	80341001	80341092
chr10	80386539	80386588
chr10	80622919	80623028
chr10	80720684	80720733
chr10	80722244	80722293
chr10	80756209	80756258
chr10	80756606	80756655
chr10	80796660	80796709
chr10	80826752	80826801
chr10	80882740	80882789
chr10	80903518	80903567
chr10	80937112	80937161
chr10	80986372	80986421
chr10	81055039	81055088
chr10	81057166	81057215
chr10	81086512	81086561
chr10	81125348	81125397
chr10	81127897	81128009
chr10	81151323	81151401
chr10	81180298	81180347
chr10	81216280	81216329
chr10	81337134	81337183
chr10	81434513	81434562
chr10	81484485	81484534
chr10	81494194	81494243
chr10	81503166	81503215
chr10	81526273	81526322
chr10	81585969	81586021
chr10	81586612	81586661
chr10	81614022	81614071
chr10	81643208	81643257
chr10	81659385	81659434
chr10	82065316	82065365
chr10	82067136	82067185
chr10	82137173	82137222
chr10	82139816	82139865
chr10	82240662	82240711
chr10	82278517	82278566
chr10	82383966	82384015
chr10	82422022	82422071
chr10	82483924	82484002
chr10	82491051	82491151
chr10	82639409	82639458
chr10	82687039	82687088
chr10	82743058	82743107
chr10	82744848	82744923
chr10	82751294	82751343
chr10	82752276	82752325
chr10	82855754	82855804
chr10	83357296	83357399
chr10	83603860	83603909
chr10	84444945	84444994
chr10	84524571	84524629
chr10	84611015	84611064
chr10	84731672	84731721
chr10	84921269	84921318
chr10	84922445	84922494
chr10	85092925	85092974
chr10	85125875	85125924
chr10	85156506	85156555
chr10	85187720	85187769
chr10	85389439	85389488
chr10	85663622	85663753
chr10	85870184	85870233
chr10	85877196	85877245
chr10	85885231	85885280
chr10	85902226	85902275
chr10	85924920	85925019
chr10	86008470	86008519
chr10	86329450	86329499
chr10	86353245	86353345
chr10	86503808	86503857
chr10	86546119	86546168
chr10	86660078	86660127
chr10	86661143	86661192
chr10	86729870	86729919
chr10	86921095	86921144
chr10	87012038	87012087
chr10	87140521	87140570
chr10	87581416	87581465
chr10	87895885	87895934
chr10	87941417	87941466
chr10	88218918	88218967
chr10	88222101	88222150
chr10	88227567	88227616
chr10	88317969	88318018
chr10	88453887	88453936
chr10	88463180	88463276
chr10	88467860	88467991
chr10	88558662	88558711
chr10	88561712	88561784
chr10	88790665	88790741
chr10	88925591	88925640
chr10	88946995	88947076
chr10	89149967	89150016
chr10	89405424	89405493
chr10	89427858	89427907
chr10	89428461	89428510
chr10	89431212	89431261
chr10	89495404	89495453
chr10	89573196	89573245
chr10	89601057	89601119
chr10	89729326	89729375
chr10	89818563	89818635
chr10	89876189	89876238
chr10	90990581	90990630
chr10	91128344	91128395
chr10	92725865	92725914
chr10	92926964	92927018
chr10	93282390	93282447
chr10	93499451	93499500
chr10	93562785	93562834
chr10	93582554	93582603
chr10	93600012	93600061
chr10	93605875	93605924
chr10	93858528	93858577
chr10	93983161	93983210
chr10	94092301	94092350
chr10	94193537	94193586
chr10	94288859	94288908
chr10	94302387	94302436
chr10	94450018	94450067
chr10	94595071	94595154
chr10	94693687	94693736
chr10	95249381	95249430
chr10	95542156	95542205
chr10	95546190	95546239
chr10	95671220	95671269
chr10	95838841	95838890
chr10	97562593	97562642
chr10	97690132	97690194
chr10	97722193	97722242
chr10	98914009	98914058
chr10	99026206	99026255
chr10	99104636	99104685
chr10	99111049	99111142
chr10	99111369	99111418
chr10	99128915	99128965
chr10	99156813	99156862
chr10	99200510	99200559
chr10	100101607	100101663
chr10	100303319	100303389
chr10	100308295	100308386
chr10	100463978	100464027
chr10	100469416	100469465
chr10	100576690	100576739
chr10	100619069	100619118
chr10	102494678	102494727
chr10	102525099	102525148
chr10	102529999	102530048
chr10	102544503	102544552
chr10	103016022	103016071
chr10	103150779	103150828
chr10	103363428	103363477
chr10	103370188	103370237
chr10	103372156	103372205
chr10	105575371	105575420
chr10	105759757	105759806
chr10	105840259	105840334
chr10	105847628	105847677
chr10	105851074	105851123
chr10	106930529	106930578
chr10	106931864	106931920
chr10	107029677	107029755
chr10	107120591	107120640
chr10	107719119	107719177
chr10	107909175	107909224
chr10	107913725	107913774
chr10	108159485	108159546
chr10	108370371	108370510
chr10	108414827	108414876
chr10	110069291	110069340
chr10	110742062	110742111
chr10	110973237	110973286
chr10	110976549	110976598
chr10	111508483	111508592
chr10	111981817	111981866
chr10	112927159	112927265
chr10	114603667	114603761
chr10	115221057	115221106
chr10	115287246	115287295
chr10	115378298	115378347
chr10	115518875	115518924
chr10	115816011	115816060
chr10	116394504	116394553
chr10	116533632	116533694
chr10	116903635	116903684
chr10	116986266	116986315
chr10	116990545	116990594
chr10	117050623	117050705
chr10	117060560	117060609
chr10	117073782	117073835
chr10	117109094	117109143
chr10	117113811	117113860
chr10	117225283	117225369
chr10	117280742	117280791
chr10	117346960	117347009
chr10	117690997	117691046
chr10	117814452	117814501
chr10	117847625	117847674
chr10	118157198	118157331
chr10	118873066	118873115
chr10	119221108	119221157
chr10	120170656	120170705
chr10	120235897	120235946
chr10	120765679	120765728
chr10	120923018	120923067
chr10	120977204	120977253
chr10	121068006	121068055
chr10	121071516	121071565
chr10	121260779	121260828
chr10	121264743	121264792
chr10	121306901	121306950
chr10	121307988	121308037
chr10	121360862	121360911
chr10	121550695	121550744
chr10	121563499	121563608
chr10	121625334	121625383
chr10	121742138	121742187
chr10	121913224	121913273
chr10	122049134	122049197
chr10	122087401	122087450
chr10	122948667	122948716
chr10	123150303	123150352
chr10	125214651	125214700
chr10	125393933	125393982
chr10	126017970	126018019
chr10	126977533	126977582
chr10	127009844	127009893
chr10	127013365	127013414
chr10	127051265	127051314
chr10	127066939	127066988
chr10	127183972	127184037
chr10	127193874	127193923
chr10	127204471	127204520
chr10	127243427	127243487
chr10	127247564	127247613
chr10	127258924	127258973
chr10	127304346	127304395
chr10	127355739	127355788
chr10	127495740	127495789
chr10	127505101	127505156
chr10	127623112	127623205
chr10	127641525	127641574
chr10	127763921	127763970
chr10	127772019	127772068
chr10	127804928	127804977
chr10	127871392	127871441
chr10	127899960	127900009
chr10	127907602	127907651
chr10	128027853	128027920
chr10	128070347	128070396
chr10	128076691	128076740
chr10	128092444	128092493
chr10	128179151	128179200
chr10	128197634	128197736
chr10	128211308	128211357
chr10	128266554	128266603
chr10	128286060	128286161
chr10	128330915	128330964
chr10	128370968	128371038
chr10	128399831	128399880
chr10	128471011	128471060
chr10	128496142	128496191
chr10	128516054	128516103
chr10	128551856	128551905
chr10	128578257	128578306
chr10	128591737	128591786
chr10	128672651	128672716
chr10	128714840	128714889
chr10	128724109	128724158
chr10	128742806	128742855
chr10	128853311	128853360
chr10	128928425	128928474
chr10	129096293	129096342
chr10	129159349	129159398
chr10	129248332	129248381
chr10	129270872	129270981
chr10	129409354	129409403
chr10	129424341	129424390
chr10	129464058	129464152
chr10	129482549	129482625
chr10	129486857	129486906
chr10	129605007	129605111
chr10	129644610	129644659
chr10	129667819	129667868
chr10	129700658	129700707
chr10	129704362	129704411
chr10	129846908	129846957
chr10	129848037	129848086
chr10	129904522	129904571
chr10	129942647	129942696
chr10	130037333	130037382
chr10	130127761	130127810
chr10	130213658	130213707
chr10	130215379	130215428
chr10	130274149	130274198
chr10	130327286	130327398
chr10	130341758	130341807
chr10	130342179	130342228
chr10	130363706	130363755
chr10	130419636	130419685
chr10	130500698	130500747
chr11	3199816	3199884
chr11	3231475	3231524
chr11	3240898	3240973
chr11	3241377	3241426
chr11	3493090	3493139
chr11	3674365	3674430
chr11	3914033	3914082
chr11	3918963	3919012
chr11	3980283	3980332
chr11	3994890	3994939
chr11	4198342	4198391
chr11	4199224	4199273
chr11	4347300	4347349
chr11	4442674	4442723
chr11	4476689	4476810
chr11	4485124	4485173
chr11	4537220	4537315
chr11	4717866	4717950
chr11	4894479	4894528
chr11	4894920	4894969
chr11	4940438	4940487
chr11	4989793	4989842
chr11	5067963	5068018
chr11	5074161	5074210
chr11	5527252	5527352
chr11	5572064	5572113
chr11	5629452	5629501
chr11	5714431	5714480
chr11	5736416	5736465
chr11	5831395	5831492
chr11	5877150	5877199
chr11	5878627	5878676
chr11	5959391	5959440
chr11	6151629	6151731
chr11	6199145	6199194
chr11	6257615	6257664
chr11	6550329	6550378
chr11	6606842	6606891
chr11	6629005	6629054
chr11	6643207	6643256
chr11	7187791	7187840
chr11	7195214	7195263
chr11	7202323	7202372
chr11	8428319	8428368
chr11	8432416	8432465
chr11	8667975	8668032
chr11	8668736	8668785
chr11	8973895	8973991
chr11	9045847	9045896
chr11	9115399	9115448
chr11	9117408	9117457
chr11	9194055	9194162
chr11	11284241	11284290
chr11	11929717	11929766
chr11	12232919	12232968
chr11	16341526	16341575
chr11	16496820	16496869
chr11	16503926	16503975
chr11	16753369	16753418
chr11	16971080	16971129
chr11	17012019	17012068
chr11	17160316	17160365
chr11	17197110	17197206
chr11	17199399	17199486
chr11	17199713	17199762
chr11	17939825	17939874
chr11	19969497	19969546
chr11	20217238	20217287
chr11	20230481	20230577
chr11	20238759	20238808
chr11	20544136	20544185
chr11	20654164	20654213
chr11	20740318	20740367
chr11	21322523	21322572
chr11	21325497	21325546
chr11	21896671	21896720
chr11	22004613	22004662
chr11	22169153	22169202
chr11	22517318	22517367
chr11	22807210	22807259
chr11	22852491	22852540
chr11	22935028	22935085
chr11	22984706	22984755
chr11	22996378	22996486
chr11	23029907	23029956
chr11	23254224	23254273
chr11	23304393	23304442
chr11	23485721	23485770
chr11	23634013	23634062
chr11	23647416	23647465
chr11	23667242	23667291
chr11	23699275	23699324
chr11	23700844	23700893
chr11	23736462	23736511
chr11	25600143	25600192
chr11	25606327	25606376
chr11	28343821	28343870
chr11	28581433	28581482
chr11	28585811	28585860
chr11	28893028	28893077
chr11	29158304	29158353
chr11	29163374	29163423
chr11	29201714	29201763
chr11	29578586	29578635
chr11	29742567	29742665
chr11	29881425	29881474
chr11	29885226	29885275
chr11	30510116	30510165
chr11	30940932	30941012
chr11	30979354	30979403
chr11	30996720	30996769
chr11	31372393	31372442
chr11	31372814	31372863
chr11	31663972	31664021
chr11	31672976	31673025
chr11	32055210	32055259
chr11	32235596	32235659
chr11	32454318	32454367
chr11	32482839	32482888
chr11	32482992	32483041
chr11	32513113	32513256
chr11	32579390	32579439
chr11	32644137	32644186
chr11	32697620	32697669
chr11	32745469	32745518
chr11	33149107	33149156
chr11	33151733	33151782
chr11	33163034	33163083
chr11	33209498	33209624
chr11	34206974	34207023
chr11	34372417	34372466
chr11	34805156	34805205
chr11	35708362	35708411
chr11	35819725	35819774
chr11	35839173	35839222
chr11	40682826	40682875
chr11	40683627	40683676
chr11	40732795	40732844
chr11	41997698	41997784
chr11	42158371	42158420
chr11	42178649	42178698
chr11	42185459	42185508
chr11	42525869	42525918
chr11	42527106	42527155
chr11	42625617	42625691
chr11	43148111	43148160
chr11	43433334	43433383
chr11	43443146	43443195
chr11	43588789	43588838
chr11	43744235	43744320
chr11	43752175	43752224
chr11	43777272	43777321
chr11	43898438	43898487
chr11	45850601	45850650
chr11	45884029	45884106
chr11	45977657	45977706
chr11	46159580	46159629
chr11	46198344	46198393
chr11	46311888	46311937
chr11	46322921	46322993
chr11	46329447	46329536
chr11	46464854	46464903
chr11	46485957	46486006
chr11	46533909	46533958
chr11	46610947	46610996
chr11	46625184	46625233
chr11	46827668	46827717
chr11	46848012	46848061
chr11	46893389	46893438
chr11	46895286	46895335
chr11	47438304	47438353
chr11	47440816	47440865
chr11	47441865	47441914
chr11	48796600	48796649
chr11	49014737	49014786
chr11	49119683	49119735
chr11	49130973	49131022
chr11	49153326	49153375
chr11	49207398	49207447
chr11	49217094	49217143
chr11	49221441	49221490
chr11	49223216	49223356
chr11	49239218	49239267
chr11	49316483	49316532
chr11	49325302	49325351
chr11	49330673	49330722
chr11	49429847	49429896
chr11	49531953	49532002
chr11	49560227	49560288
chr11	49605772	49605821
chr11	49668072	49668121
chr11	49795110	49795162
chr11	49838693	49838742
chr11	49845552	49845601
chr11	49866350	49866399
chr11	49888256	49888399
chr11	49977811	49977860
chr11	50168493	50168542
chr11	50196449	50196498
chr11	50202403	50202452
chr11	50211807	50211856
chr11	50321780	50321829
chr11	50434827	50434876
chr11	50845246	50845341
chr11	50870106	50870164
chr11	50882558	50882607
chr11	50892096	50892145
chr11	50913871	50913920
chr11	51260313	51260362
chr11	51284637	51284686
chr11	51294473	51294522
chr11	51582150	51582199
chr11	51595626	51595719
chr11	51644581	51644630
chr11	51814812	51814868
chr11	51860083	51860132
chr11	52148893	52148942
chr11	52216151	52216200
chr11	52243574	52243689
chr11	52764328	52764377
chr11	53192026	53192075
chr11	53320660	53320709
chr11	53354505	53354554
chr11	53386943	53386992
chr11	53472962	53473011
chr11	53569027	53569076
chr11	53627942	53627991
chr11	53711803	53711852
chr11	54009456	54009505
chr11	54070258	54070315
chr11	54268716	54268765
chr11	54609063	54609112
chr11	54750785	54750850
chr11	54757103	54757152
chr11	54904391	54904440
chr11	54965579	54965628
chr11	55097335	55097384
chr11	55124332	55124444
chr11	55341121	55341170
chr11	55398993	55399042
chr11	55455892	55455941
chr11	55505165	55505214
chr11	55606166	55606215
chr11	57168565	57168633
chr11	57169233	57169282
chr11	57332977	57333032
chr11	57502131	57502180
chr11	57515538	57515587
chr11	57517181	57517230
chr11	57528841	57528890
chr11	57804677	57804726
chr11	58428269	58428318
chr11	58445268	58445317
chr11	58452631	58452680
chr11	58487528	58487577
chr11	58535921	58535970
chr11	58606911	58606960
chr11	58795447	58795496
chr11	58804551	58804600
chr11	58844919	58844968
chr11	58847872	58847921
chr11	58852127	58852176
chr11	58877907	58877956
chr11	58933246	58933295
chr11	59069287	59069336
chr11	59180617	59180666
chr11	59192596	59192659
chr11	59251381	59251430
chr11	59270049	59270098
chr11	59463305	59463354
chr11	59527318	59527367
chr11	59569998	59570047
chr11	59592833	59592882
chr11	59783328	59783427
chr11	59952007	59952056
chr11	60221785	60221852
chr11	60474277	60474326
chr11	60501520	60501602
chr11	60699037	60699086
chr11	60758655	60758704
chr11	60787919	60787968
chr11	60942370	60942419
chr11	60946176	60946225
chr11	60946740	60946789
chr11	61144792	61144841
chr11	61174055	61174132
chr11	61508778	61508827
chr11	61731130	61731218
chr11	61733897	61733946
chr11	61896288	61896337
chr11	61960335	61960384
chr11	62385345	62385394
chr11	62540963	62541012
chr11	62647179	62647228
chr11	62787975	62788098
chr11	62821102	62821187
chr11	62864516	62864614
chr11	63158098	63158147
chr11	64019992	64020041
chr11	65085561	65085610
chr11	65159951	65160000
chr11	65689881	65689930
chr11	65739523	65739595
chr11	67083256	67083312
chr11	67094850	67094899
chr11	67166705	67166754
chr11	67185436	67185517
chr11	67257644	67257693
chr11	67265259	67265308
chr11	67291716	67291813
chr11	67351313	67351362
chr11	67372727	67372776
chr11	67456312	67456372
chr11	67662266	67662315
chr11	67688629	67688678
chr11	67925599	67925648
chr11	67970988	67971037
chr11	68306414	68306463
chr11	68469073	68469122
chr11	68559814	68559863
chr11	68753480	68753529
chr11	68938764	68938872
chr11	68949193	68949242
chr11	68951397	68951446
chr11	68969513	68969562
chr11	69032731	69032780
chr11	69118707	69118756
chr11	69147199	69147248
chr11	69193206	69193280
chr11	69198571	69198620
chr11	69411324	69411379
chr11	69482199	69482248
chr11	69483993	69484042
chr11	69485604	69485733
chr11	69579239	69579288
chr11	69589822	69589918
chr11	69601284	69601333
chr11	69663659	69663708
chr11	69732829	69732878
chr11	69733296	69733345
chr11	69755256	69755305
chr11	69759577	69759626
chr11	69760947	69760996
chr11	69782458	69782507
chr11	69793114	69793163
chr11	69967080	69967129
chr11	69990615	69990664
chr11	71745365	71745414
chr11	71774745	71774794
chr11	72213946	72213995
chr11	72256232	72256281
chr11	72445479	72445528
chr11	72469547	72469596
chr11	72645165	72645239
chr11	72727786	72727835
chr11	72735445	72735494
chr11	72772586	72772635
chr11	72992997	72993046
chr11	73373287	73373336
chr11	73968270	73968319
chr11	74380019	74380068
chr11	74701055	74701104
chr11	74701637	74701686
chr11	74799798	74799925
chr11	74802785	74802834
chr11	74906897	74906946
chr11	75168907	75168956
chr11	75182127	75182176
chr11	75326436	75326485
chr11	75421927	75421990
chr11	75435395	75435444
chr11	75452926	75452975
chr11	75456357	75456429
chr11	75680646	75680695
chr11	75692248	75692297
chr11	75733622	75733671
chr11	75771908	75771957
chr11	76002639	76002688
chr11	76176699	76176772
chr11	76247191	76247240
chr11	76326580	76326629
chr11	76902434	76902483
chr11	76960012	76960061
chr11	77505908	77505957
chr11	77714590	77714668
chr11	77766451	77766532
chr11	77767466	77767515
chr11	77817231	77817280
chr11	77880988	77881037
chr11	78084823	78084872
chr11	78159552	78159601
chr11	78175916	78175965
chr11	78179404	78179463
chr11	78273002	78273051
chr11	78310325	78310374
chr11	78324668	78324717
chr11	78412241	78412290
chr11	78508640	78508689
chr11	78553291	78553340
chr11	78635377	78635426
chr11	78695448	78695497
chr11	78966955	78967014
chr11	79077581	79077630
chr11	79078589	79078638
chr11	79336471	79336520
chr11	79343277	79343341
chr11	79457953	79458002
chr11	79465049	79465098
chr11	79465364	79465413
chr11	79501077	79501126
chr11	79935771	79935873
chr11	80034540	80034589
chr11	80043778	80043827
chr11	80081378	80081427
chr11	80108027	80108076
chr11	80145654	80145703
chr11	80392197	80392246
chr11	80425676	80425725
chr11	80430428	80430477
chr11	80454702	80454751
chr11	81864076	81864125
chr11	81893937	81893986
chr11	81898170	81898219
chr11	81972863	81972912
chr11	82044046	82044095
chr11	82737538	82737587
chr11	82783142	82783191
chr11	82915298	82915347
chr11	83347084	83347133
chr11	83447244	83447339
chr11	83461192	83461274
chr11	83475237	83475288
chr11	83486021	83486070
chr11	83509717	83509766
chr11	83585066	83585115
chr11	83663318	83663379
chr11	83963762	83963811
chr11	84003486	84003610
chr11	84081662	84081711
chr11	84145451	84145500
chr11	84148664	84148713
chr11	84164110	84164159
chr11	84169542	84169591
chr11	84401704	84401753
chr11	84516232	84516281
chr11	84828473	84828522
chr11	84849203	84849252
chr11	84980097	84980146
chr11	84982576	84982625
chr11	85060311	85060360
chr11	85188092	85188141
chr11	85592263	85592355
chr11	85915444	85915493
chr11	86235450	86235499
chr11	86311751	86311830
chr11	86313191	86313240
chr11	86316414	86316463
chr11	86568244	86568318
chr11	86684678	86684727
chr11	86752743	86752792
chr11	87381115	87381164
chr11	89979438	89979487
chr11	89982108	89982157
chr11	90558707	90558756
chr11	90559738	90559787
chr11	90644883	90644932
chr11	93920923	93921024
chr11	93991780	93991829
chr11	94058263	94058312
chr11	94065057	94065106
chr11	94128934	94128983
chr11	94232820	94232869
chr11	94328848	94328943
chr11	94330131	94330180
chr11	94412073	94412122
chr11	94444894	94444991
chr11	94469242	94469291
chr11	94501834	94501887
chr11	94524045	94524094
chr11	94545599	94545648
chr11	94650621	94650670
chr11	94654182	94654264
chr11	94775780	94775829
chr11	94936595	94936650
chr11	94994074	94994123
chr11	95009651	95009700
chr11	95056980	95057029
chr11	95063351	95063400
chr11	95126551	95126600
chr11	95269836	95269885
chr11	95417316	95417394
chr11	95727796	95727845
chr11	95770154	95770203
chr11	95888750	95888799
chr11	95954353	95954425
chr11	96111655	96111704
chr11	96154356	96154405
chr11	96607159	96607235
chr11	96772756	96772831
chr11	96803902	96803951
chr11	96944168	96944217
chr11	97156560	97156609
chr11	97184982	97185031
chr11	97346833	97346891
chr11	97412499	97412548
chr11	97729053	97729157
chr11	97765775	97765824
chr11	97819152	97819201
chr11	97822879	97822928
chr11	97835860	97835909
chr11	97869732	97869781
chr11	97921826	97921875
chr11	97955242	97955303
chr11	97990641	97990690
chr11	97996116	97996165
chr11	98150581	98150682
chr11	98152754	98152803
chr11	98445610	98445659
chr11	98503794	98503843
chr11	98550072	98550121
chr11	98556188	98556237
chr11	98593993	98594042
chr11	98600269	98600318
chr11	98679168	98679217
chr11	98682491	98682540
chr11	98730727	98730776
chr11	98730861	98730910
chr11	98738304	98738353
chr11	98740294	98740343
chr11	98820277	98820326
chr11	98842579	98842628
chr11	98848759	98848808
chr11	99046581	99046630
chr11	99070387	99070436
chr11	99232941	99232996
chr11	99235956	99236064
chr11	99246471	99246520
chr11	99285636	99285685
chr11	99287769	99287818
chr11	99328163	99328231
chr11	99336411	99336460
chr11	99349168	99349217
chr11	99355082	99355131
chr11	99376964	99377013
chr11	99417982	99418031
chr11	99437177	99437226
chr11	99474288	99474337
chr11	99518788	99518837
chr11	99589239	99589288
chr11	99735157	99735206
chr11	99775481	99775530
chr11	99812990	99813039
chr11	99849933	99849982
chr11	99941099	99941148
chr11	100044188	100044237
chr11	100078375	100078451
chr11	100100567	100100625
chr11	100119076	100119125
chr11	100144888	100144937
chr11	100252704	100252753
chr11	100419903	100419952
chr11	100528618	100528667
chr11	100592108	100592157
chr11	100601758	100601807
chr11	100733667	100733716
chr11	100785374	100785448
chr11	100816959	100817024
chr11	100886037	100886086
chr11	100952852	100952901
chr11	101007106	101007196
chr11	101007734	101007812
chr11	101034096	101034145
chr11	101038287	101038375
chr11	101040118	101040206
chr11	101066241	101066290
chr11	101103645	101103702
chr11	101166827	101166876
chr11	101365878	101365927
chr11	101433090	101433139
chr11	101436016	101436091
chr11	101463168	101463217
chr11	102069820	102069869
chr11	102092527	102092576
chr11	102215664	102215713
chr11	102232735	102232784
chr11	102283794	102283843
chr11	102290288	102290337
chr11	102351607	102351656
chr11	102475949	102475998
chr11	102607891	102607940
chr11	103409097	103409146
chr11	103456184	103456233
[truncated: 9,958 more rows]

## Sheet: ATAC-seq_TFBS
ATAC_TFBS_chr	ATAC_TFBS_start	ATAC_TFBS_end
chr1	9797924	9797938
chr1	9798000	9798014
chr1	10993430	10993444
chr1	13374440	13374454
chr1	16091821	16091835
chr1	20820608	20820622
chr1	20820647	20820661
chr1	23922033	23922047
chr1	31175592	31175606
chr1	34842219	34842233
chr1	36307859	36307873
chr1	36309924	36309938
chr1	36709522	36709536
chr1	36940486	36940500
chr1	37300070	37300084
chr1	37429785	37429799
chr1	37430547	37430561
chr1	39192945	39192959
chr1	39192992	39193006
chr1	39194006	39194020
chr1	39530645	39530659
chr1	39902587	39902601
chr1	40681434	40681448
chr1	42851516	42851530
chr1	44102024	44102038
chr1	45795066	45795080
chr1	45926071	45926085
chr1	51289189	51289203
chr1	51478699	51478713
chr1	51916111	51916125
chr1	52119696	52119710
chr1	54926658	54926672
chr1	55029122	55029136
chr1	55087448	55087462
chr1	55088092	55088106
chr1	55198911	55198925
chr1	57406753	57406767
chr1	57774305	57774319
chr1	59763141	59763155
chr1	60343962	60343976
chr1	63177050	63177064
chr1	63730400	63730414
chr1	64532446	64532460
chr1	64616883	64616897
chr1	64738179	64738193
chr1	66862827	66862841
chr1	72261739	72261753
chr1	72307126	72307140
chr1	72307228	72307242
chr1	72871681	72871695
chr1	72874055	72874069
chr1	74014698	74014712
chr1	74237163	74237177
chr1	74248847	74248861
chr1	74250318	74250332
chr1	74284261	74284275
chr1	74284441	74284455
chr1	74391954	74391968
chr1	74397186	74397200
chr1	74397998	74398012
chr1	74434850	74434864
chr1	74506116	74506130
chr1	74506212	74506226
chr1	74506292	74506306
chr1	74601573	74601587
chr1	74750980	74750994
chr1	75124996	75125010
chr1	75125043	75125057
chr1	75142739	75142753
chr1	75169147	75169161
chr1	75219228	75219242
chr1	75236980	75236994
chr1	75244964	75244978
chr1	75479395	75479409
chr1	77514673	77514687
chr1	82771464	82771478
chr1	83036989	83037003
chr1	83408226	83408240
chr1	84696326	84696340
chr1	84924314	84924328
chr1	85928291	85928305
chr1	86214407	86214421
chr1	87213746	87213760
chr1	87849635	87849649
chr1	92181154	92181168
chr1	92831422	92831436
chr1	92906795	92906809
chr1	93227686	93227700
chr1	93687063	93687077
chr1	93804545	93804559
chr1	93937959	93937973
chr1	94035702	94035716
chr1	95313344	95313358
chr1	95314351	95314365
chr1	97630633	97630647
chr1	97659496	97659510
chr1	97769380	97769394
chr1	106629676	106629690
chr1	106712153	106712167
chr1	106738265	106738279
chr1	118388281	118388295
chr1	118389231	118389245
chr1	119050136	119050150
chr1	119505233	119505247
chr1	119648545	119648559
chr1	120072979	120072993
chr1	120074069	120074083
chr1	120116303	120116317
chr1	120120420	120120434
chr1	125561319	125561333
chr1	127205972	127205986
chr1	127850185	127850199
chr1	131270471	131270485
chr1	131527844	131527858
chr1	131827375	131827389
chr1	131867772	131867786
chr1	132008652	132008666
chr1	132125977	132125991
chr1	132311666	132311680
chr1	132312972	132312986
chr1	132316156	132316170
chr1	132333943	132333957
chr1	133131020	133131034
chr1	133131701	133131715
chr1	133363797	133363811
chr1	133367688	133367702
chr1	133422920	133422934
chr1	133424145	133424159
chr1	133424312	133424326
chr1	134182257	134182271
chr1	134222183	134222197
chr1	134222344	134222358
chr1	134415916	134415930
chr1	135106059	135106073
chr1	135146294	135146308
chr1	135159184	135159198
chr1	135159515	135159529
chr1	135368203	135368217
chr1	136135368	136135382
chr1	136346550	136346564
chr1	136346601	136346615
chr1	139454841	139454855
chr1	143777973	143777987
chr1	150392937	150392951
chr1	151343678	151343692
chr1	151501369	151501383
chr1	152746542	152746556
chr1	152904645	152904659
chr1	153040527	153040541
chr1	153501947	153501961
chr1	153911375	153911389
chr1	155099270	155099284
chr1	155146912	155146926
chr1	155158336	155158350
chr1	155158448	155158462
chr1	155417058	155417072
chr1	155558054	155558068
chr1	155721567	155721581
chr1	155812521	155812535
chr1	155812667	155812681
chr1	156066474	156066488
chr1	156644375	156644389
chr1	157458396	157458410
chr1	161070991	161071005
chr1	161250555	161250569
chr1	161976436	161976450
chr1	162550122	162550136
chr1	162938057	162938071
chr1	164248175	164248189
chr1	164248532	164248546
chr1	164307844	164307858
chr1	164454841	164454855
chr1	165764234	165764248
chr1	165766641	165766655
chr1	165771508	165771522
chr1	165771834	165771848
chr1	166384880	166384894
chr1	166410127	166410141
chr1	167308971	167308985
chr1	167349845	167349859
chr1	167618168	167618182
chr1	168432495	168432509
chr1	169531827	169531841
chr1	169928392	169928406
chr1	169969180	169969194
chr1	170885186	170885200
chr1	171150365	171150379
chr1	171184571	171184585
chr1	171294327	171294341
chr1	171328978	171328992
chr1	171329747	171329761
chr1	171360472	171360486
chr1	171437904	171437918
chr1	172082939	172082953
chr1	172206966	172206980
chr1	172271719	172271733
chr1	172297764	172297778
chr1	172302516	172302530
chr1	172320114	172320128
chr1	172490422	172490436
chr1	172500196	172500210
chr1	172500843	172500857
chr1	172500921	172500935
chr1	172562733	172562747
chr1	172632677	172632691
chr1	177796260	177796274
chr1	179624524	179624538
chr1	180428017	180428031
chr1	180726029	180726043
chr1	181015221	181015235
chr1	182440133	182440147
chr1	182458687	182458701
chr1	182955179	182955193
chr1	184733317	184733331
chr1	184845074	184845088
chr1	190929408	190929422
chr1	191085390	191085404
chr1	191086785	191086799
chr1	191821200	191821214
chr1	191906286	191906300
chr1	192770873	192770887
chr1	192771077	192771091
chr1	193173461	193173475
chr1	194938722	194938736
chr10	7726405	7726419
chr10	11343120	11343134
chr10	13500781	13500795
chr10	13966832	13966846
chr10	14055425	14055439
chr10	14705244	14705258
chr10	17728154	17728168
chr10	19009508	19009522
chr10	19014841	19014855
chr10	19015916	19015930
chr10	19591875	19591889
chr10	19937376	19937390
chr10	20148666	20148680
chr10	20311655	20311669
chr10	20723134	20723148
chr10	21605646	21605660
chr10	22000828	22000842
chr10	22732002	22732016
chr10	24635391	24635405
chr10	25239338	25239352
chr10	25311968	25311982
chr10	28074421	28074435
chr10	29313123	29313137
chr10	29313671	29313685
chr10	29494295	29494309
chr10	34034189	34034203
chr10	40025204	40025218
chr10	41474269	41474283
chr10	42476921	42476935
chr10	42478054	42478068
chr10	42583701	42583715
chr10	42862574	42862588
chr10	43174894	43174908
chr10	43540674	43540688
chr10	44148903	44148917
chr10	45114614	45114628
chr10	50592331	50592345
chr10	52232543	52232557
chr10	53596922	53596936
chr10	54074420	54074434
chr10	56115562	56115576
chr10	58255476	58255490
chr10	58323013	58323027
chr10	58323273	58323287
chr10	58371718	58371732
chr10	59950733	59950747
chr10	59951515	59951529
chr10	59952565	59952579
chr10	60107147	60107161
chr10	60278179	60278193
chr10	60351571	60351585
chr10	60732522	60732536
chr10	60792943	60792957
chr10	61199788	61199802
chr10	61426326	61426340
chr10	61648375	61648389
chr10	61734555	61734569
chr10	61980712	61980726
chr10	62487105	62487119
chr10	62590380	62590394
chr10	62972086	62972100
chr10	63424547	63424561
chr10	67097509	67097523
chr10	67098691	67098705
chr10	67285025	67285039
chr10	67549461	67549475
chr10	68283319	68283333
chr10	69353091	69353105
chr10	75037006	75037020
chr10	75059399	75059413
chr10	75590001	75590015
chr10	75773574	75773588
chr10	75781197	75781211
chr10	75835451	75835465
chr10	75920983	75920997
chr10	75935795	75935809
chr10	77033707	77033721
chr10	77417995	77418009
chr10	77582224	77582238
chr10	77902887	77902901
chr10	77903224	77903238
chr10	78160278	78160292
chr10	78244329	78244343
chr10	78244351	78244365
chr10	78452893	78452907
chr10	78455554	78455568
chr10	78464663	78464677
chr10	78465620	78465634
chr10	78574655	78574669
chr10	79645909	79645923
chr10	79669294	79669308
chr10	79681547	79681561
chr10	79698249	79698263
chr10	79728668	79728682
chr10	79746384	79746398
chr10	79746398	79746412
chr10	79794765	79794779
chr10	79802562	79802576
chr10	79854133	79854147
chr10	79908717	79908731
chr10	80052245	80052259
chr10	80054228	80054242
chr10	80141205	80141219
chr10	80149104	80149118
chr10	80149664	80149678
chr10	80161098	80161112
chr10	80248858	80248872
chr10	80302526	80302540
chr10	80557719	80557733
chr10	80757710	80757724
chr10	80798991	80799005
chr10	80900657	80900671
chr10	80900937	80900951
chr10	80901093	80901107
chr10	81129298	81129312
chr10	81232921	81232935
chr10	81268418	81268432
chr10	81328567	81328581
chr10	81338799	81338813
chr10	81350200	81350214
chr10	81350987	81351001
chr10	81384840	81384854
chr10	81430155	81430169
chr10	81473226	81473240
chr10	81484587	81484601
chr10	81496060	81496074
chr10	81559399	81559413
chr10	81559961	81559975
chr10	82622879	82622893
chr10	82623470	82623484
chr10	82629656	82629670
chr10	83337858	83337872
chr10	84577104	84577118
chr10	84902247	84902261
chr10	84902390	84902404
chr10	84902629	84902643
chr10	84917548	84917562
chr10	86296425	86296439
chr10	86727604	86727618
chr10	86727777	86727791
chr10	86728463	86728477
chr10	86731220	86731234
chr10	86778922	86778936
chr10	87057644	87057658
chr10	87552964	87552978
chr10	88201554	88201568
chr10	89686680	89686694
chr10	91124266	91124280
chr10	93310071	93310085
chr10	93589668	93589682
chr10	94147989	94148003
chr10	94148240	94148254
chr10	95417071	95417085
chr10	95417979	95417993
chr10	95489780	95489794
chr10	95940254	95940268
chr10	98914879	98914893
chr10	99127809	99127823
chr10	99261549	99261563
chr10	100589051	100589065
chr10	102511302	102511316
chr10	102511423	102511437
chr10	102512331	102512345
chr10	110920435	110920449
chr10	110939249	110939263
chr10	111160217	111160231
chr10	111160340	111160354
chr10	112002831	112002845
chr10	116018727	116018741
chr10	116581526	116581540
chr10	117148942	117148956
chr10	117731513	117731527
chr10	117845564	117845578
chr10	118869798	118869812
chr10	119240132	119240146
chr10	120113143	120113157
chr10	120954567	120954581
chr10	121290033	121290047
chr10	121364768	121364782
chr10	121364799	121364813
chr10	121475902	121475916
chr10	121476975	121476989
chr10	121739805	121739819
chr10	122047122	122047136
chr10	122097277	122097291
chr10	126979735	126979749
chr10	127165977	127165991
chr10	127171120	127171134
chr10	127180491	127180505
chr10	127194867	127194881
chr10	127195326	127195340
chr10	127195878	127195892
chr10	127311863	127311877
chr10	127312427	127312441
chr10	127340130	127340144
chr10	127342112	127342126
chr10	127380205	127380219
chr10	127512227	127512241
chr10	127537959	127537973
chr10	127622150	127622164
chr10	127662066	127662080
chr10	127738270	127738284
chr10	127738306	127738320
chr10	127744720	127744734
chr10	127749398	127749412
chr10	128082975	128082989
chr10	128091287	128091301
chr10	128091343	128091357
chr10	128091855	128091869
chr10	128302923	128302937
chr10	128303511	128303525
chr10	128337408	128337422
chr10	128410125	128410139
chr10	128459587	128459601
chr10	128489575	128489589
chr10	128747865	128747879
chr10	128805498	128805512
chr10	128896470	128896484
chr11	3289867	3289881
chr11	3452603	3452617
chr11	3931605	3931619
chr11	4080331	4080345
chr11	4160417	4160431
chr11	4219474	4219488
chr11	4259043	4259057
chr11	4661497	4661511
chr11	4704123	4704137
chr11	4704237	4704251
chr11	4704876	4704890
chr11	4873790	4873804
chr11	4984552	4984566
chr11	4987126	4987140
chr11	4987177	4987191
chr11	4988740	4988754
chr11	5707942	5707956
chr11	5788385	5788399
chr11	5836363	5836377
chr11	5838078	5838092
chr11	6292503	6292517
chr11	6444863	6444877
chr11	6625738	6625752
chr11	22850274	22850288
chr11	22860213	22860227
chr11	22860446	22860460
chr11	22990930	22990944
chr11	23498136	23498150
chr11	23666471	23666485
chr11	29885475	29885489
chr11	30267932	30267946
chr11	30268878	30268892
chr11	30953707	30953721
chr11	31907872	31907886
chr11	31907902	31907916
chr11	32221584	32221598
chr11	32243836	32243850
chr11	32267810	32267824
chr11	33513871	33513885
chr11	40694959	40694973
chr11	40733701	40733715
chr11	44470645	44470659
chr11	44518742	44518756
chr11	44545313	44545327
chr11	46252066	46252080
chr11	46312464	46312478
chr11	48826611	48826625
chr11	48901297	48901311
chr11	49076614	49076628
chr11	49713124	49713138
chr11	49870031	49870045
chr11	49938870	49938884
chr11	50131043	50131057
chr11	50205652	50205666
chr11	50325238	50325252
chr11	50377260	50377274
chr11	51262845	51262859
chr11	51584172	51584186
chr11	51585008	51585022
chr11	51605850	51605864
chr11	51619633	51619647
chr11	51636295	51636309
chr11	51646776	51646790
chr11	51855359	51855373
chr11	52397036	52397050
chr11	53521385	53521399
chr11	53788542	53788556
chr11	54002761	54002775
chr11	54056361	54056375
chr11	54071950	54071964
chr11	54867161	54867175
chr11	55077696	55077710
chr11	55155273	55155287
chr11	55424110	55424124
chr11	55450602	55450616
chr11	57518496	57518510
chr11	57524707	57524721
chr11	57801439	57801453
chr11	58009773	58009787
chr11	58104160	58104174
chr11	58914942	58914956
chr11	58939096	58939110
chr11	59226827	59226841
chr11	59228679	59228693
chr11	59330656	59330670
chr11	60209573	60209587
chr11	60293018	60293032
chr11	60352883	60352897
chr11	60353315	60353329
chr11	60454284	60454298
chr11	60912574	60912588
chr11	61493725	61493739
chr11	61684410	61684424
chr11	61854156	61854170
chr11	61929792	61929806
chr11	62224113	62224127
chr11	62249462	62249476
chr11	62281760	62281774
chr11	62848002	62848016
chr11	63077614	63077628
chr11	63124337	63124351
chr11	63124363	63124377
chr11	67025057	67025071
chr11	67350508	67350522
chr11	69040066	69040080
chr11	69040371	69040385
chr11	69100232	69100246
chr11	69118868	69118882
chr11	69123505	69123519
chr11	69124383	69124397
chr11	69235529	69235543
chr11	69364979	69364993
chr11	69366207	69366221
chr11	69368352	69368366
chr11	69395129	69395143
chr11	69396695	69396709
chr11	69417755	69417769
chr11	69419473	69419487
chr11	69581015	69581029
chr11	69603754	69603768
chr11	69666455	69666469
chr11	69846512	69846526
chr11	69880983	69880997
chr11	69900904	69900918
chr11	69948657	69948671
chr11	70015347	70015361
chr11	70222062	70222076
chr11	70453439	70453453
chr11	70506663	70506677
chr11	70688183	70688197
chr11	70700980	70700994
chr11	70764229	70764243
chr11	70764655	70764669
chr11	70897942	70897956
chr11	70970632	70970646
chr11	71230838	71230852
chr11	72052782	72052796
chr11	73039689	73039703
chr11	73047736	73047750
chr11	73085223	73085237
chr11	73176844	73176858
chr11	74647952	74647966
chr11	74648129	74648143
chr11	74649316	74649330
chr11	74649460	74649474
chr11	74650428	74650442
chr11	74874768	74874782
chr11	75510120	75510134
chr11	75531393	75531407
chr11	75630559	75630573
chr11	75635502	75635516
chr11	76179725	76179739
chr11	76399433	76399447
chr11	76699653	76699667
chr11	77493099	77493113
chr11	77498446	77498460
chr11	77508384	77508398
chr11	77513088	77513102
chr11	77685677	77685691
chr11	77765224	77765238
chr11	77766883	77766897
chr11	77786102	77786116
chr11	77786120	77786134
chr11	77981872	77981886
chr11	78044686	78044700
chr11	78060572	78060586
chr11	78159111	78159125
chr11	78194819	78194833
chr11	78262278	78262292
chr11	78347643	78347657
chr11	78536289	78536303
chr11	78828590	78828604
chr11	79145420	79145434
chr11	79145453	79145467
chr11	79503950	79503964
chr11	79644527	79644541
chr11	79647080	79647094
chr11	79992755	79992769
chr11	80085868	80085882
chr11	80146208	80146222
chr11	80155811	80155825
chr11	80429425	80429439
chr11	81860628	81860642
chr11	82870562	82870576
chr11	83441377	83441391
chr11	83454689	83454703
chr11	83473439	83473453
chr11	83578644	83578658
chr11	84129761	84129775
chr11	84828392	84828406
chr11	84871180	84871194
chr11	84959856	84959870
chr11	85183039	85183053
chr11	85310841	85310855
chr11	86545187	86545201
chr11	86757042	86757056
chr11	87404181	87404195
chr11	87554270	87554284
chr11	87986458	87986472
chr11	88197501	88197515
chr11	89024386	89024400
chr11	89024625	89024639
chr11	90389869	90389883
chr11	90638832	90638846
chr11	90665531	90665545
chr11	93968681	93968695
chr11	94210051	94210065
chr11	94210567	94210581
chr11	94548466	94548480
chr11	94707804	94707818
chr11	94989217	94989231
chr11	94997845	94997859
chr11	95047130	95047144
chr11	95835367	95835381
chr11	96301992	96302006
chr11	96862192	96862206
chr11	96916859	96916873
chr11	96935370	96935384
chr11	96967311	96967325
chr11	97150820	97150834
chr11	97315367	97315381
chr11	97412240	97412254
chr11	97412396	97412410
chr11	97418814	97418828
chr11	97512189	97512203
chr11	97543135	97543149
chr11	97543729	97543743
chr11	97546333	97546347
chr11	97575794	97575808
chr11	97821039	97821053
chr11	97994736	97994750
chr11	98031559	98031573
chr11	98345361	98345375
chr11	98348879	98348893
chr11	98361269	98361283
chr11	98372372	98372386
chr11	98446743	98446757
chr11	98740991	98741005
chr11	98743015	98743029
chr11	98751734	98751748
chr11	98774284	98774298
chr11	98796790	98796804
chr11	98849339	98849353
chr11	98863362	98863376
chr11	99385926	99385940
chr11	100388816	100388830
chr11	100574751	100574765
chr11	100701425	100701439
chr11	100714276	100714290
chr11	101095286	101095300
chr11	101163071	101163085
chr11	101226327	101226341
chr11	101230739	101230753
chr11	101315665	101315679
chr11	101442392	101442406
chr11	101464344	101464358
chr11	101562562	101562576
chr11	101589606	101589620
chr11	101668087	101668101
chr11	101981971	101981985
chr11	102088349	102088363
chr11	102089351	102089365
chr11	102284756	102284770
chr11	102408810	102408824
chr11	102431342	102431356
chr11	102611128	102611142
chr11	102697914	102697928
chr11	102770797	102770811
chr11	102900976	102900990
chr11	103141781	103141795
chr11	103172288	103172302
chr11	103246304	103246318
chr11	103267514	103267528
chr11	104232331	104232345
chr11	104549705	104549719
chr11	106163715	106163729
chr11	106487975	106487989
chr11	106491570	106491584
chr11	107471070	107471084
chr11	107473537	107473551
chr11	107479286	107479300
chr11	108343446	108343460
chr11	108343557	108343571
chr11	109361628	109361642
chr11	109470418	109470432
chr11	109651835	109651849
chr11	109721946	109721960
chr11	113683981	113683995
chr11	113735338	113735352
chr11	113751365	113751379
chr11	114675201	114675215
chr11	114676672	114676686
chr11	114693601	114693615
chr11	114898340	114898354
chr11	115163462	115163476
chr11	115163705	115163719
chr11	115165297	115165311
chr11	115165327	115165341
chr11	115265533	115265547
chr11	115277557	115277571
chr11	115297670	115297684
chr11	115513493	115513507
chr11	115809236	115809250
chr11	115813482	115813496
chr11	115814227	115814241
chr11	116005510	116005524
chr11	116023800	116023814
chr11	116195429	116195443
chr11	116198980	116198994
chr11	116199239	116199253
chr11	116199329	116199343
chr11	116330271	116330285
chr11	116436781	116436795
chr11	116489984	116489998
chr11	116592553	116592567
chr11	116615637	116615651
chr11	116814758	116814772
chr11	116868242	116868256
chr11	117779631	117779645
chr11	117792397	117792411
chr11	118249244	118249258
chr11	118401670	118401684
chr11	119392213	119392227
chr11	119392303	119392317
chr11	119491507	119491521
chr11	120030534	120030548
chr11	120048075	120048089
chr11	120051401	120051415
chr11	120086623	120086637
chr11	120101208	120101222
chr11	120264114	120264128
chr11	120358141	120358155
chr11	120467246	120467260
chr11	120491539	120491553
chr11	120648251	120648265
chr11	120707418	120707432
chr11	120727173	120727187
chr11	120729910	120729924
chr11	121236625	121236639
chr11	121237226	121237240
chr11	121259769	121259783
chr11	121451949	121451963
chr12	3806316	3806330
chr12	3808601	3808615
chr12	4038641	4038655
chr12	4083046	4083060
chr12	4685708	4685722
chr12	4817284	4817298
chr12	8302101	8302115
chr12	8496396	8496410
chr12	8947975	8947989
chr12	9030660	9030674
chr12	14152630	14152644
chr12	16657429	16657443
chr12	16894260	16894274
chr12	17000013	17000027
chr12	17176736	17176750
chr12	17690457	17690471
chr12	17741681	17741695
chr12	21190423	21190437
chr12	21316729	21316743
chr12	24498350	24498364
chr12	24652079	24652093
chr12	24974655	24974669
chr12	25096465	25096479
chr12	28750737	28750751
chr12	30050456	30050470
chr12	30373482	30373496
chr12	31351033	31351047
chr12	33035470	33035484
chr12	33430012	33430026
chr12	36157618	36157632
chr12	36381688	36381702
chr12	37241629	37241643
chr12	37241836	37241850
chr12	37242606	37242620
chr12	38779905	38779919
chr12	40379773	40379787
chr12	46819427	46819441
chr12	51830207	51830221
chr12	53247029	53247043
chr12	55560480	55560494
chr12	59067212	59067226
chr12	59219843	59219857
chr12	67221628	67221642
chr12	69367770	69367784
chr12	69371383	69371397
chr12	70293129	70293143
chr12	71309543	71309557
chr12	71830760	71830774
chr12	72071030	72071044
chr12	72104665	72104679
chr12	72104825	72104839
chr12	72442416	72442430
chr12	72536132	72536146
chr12	73779576	73779590
chr12	73965073	73965087
chr12	75733501	75733515
chr12	76369799	76369813
chr12	78748348	78748362
chr12	78749273	78749287
chr12	78749661	78749675
chr12	78980676	78980690
chr12	79512411	79512425
chr12	80168317	80168331
chr12	80599247	80599261
chr12	82169525	82169539
chr12	82448249	82448263
chr12	83987318	83987332
chr12	83987385	83987399
chr12	83999433	83999447
chr12	84009522	84009536
chr12	84020727	84020741
chr12	84038365	84038379
chr12	84217240	84217254
chr12	84450640	84450654
chr12	84451124	84451138
chr12	84675102	84675116
chr12	84755420	84755434
chr12	85151201	85151215
chr12	85170251	85170265
chr12	85339361	85339375
chr12	85374264	85374278
chr12	85374847	85374861
chr12	85598297	85598311
chr12	85746134	85746148
chr12	86158127	86158141
chr12	86158996	86159010
chr12	86163042	86163056
chr12	86687708	86687722
chr12	86694674	86694688
chr12	86879706	86879720
chr12	86948107	86948121
chr12	87147205	87147219
chr12	88360687	88360701
chr12	90734235	90734249
chr12	90738960	90738974
chr12	98675132	98675146
chr12	98737977	98737991
chr12	99965313	99965327
chr12	101027038	101027052
chr12	102283940	102283954
chr12	102333321	102333335
chr12	102439911	102439925
chr12	102468799	102468813
chr12	102469590	102469604
chr12	102469614	102469628
chr12	102550812	102550826
chr12	102634617	102634631
chr12	102704423	102704437
chr12	103218501	103218515
chr12	103218523	103218537
chr12	103221114	103221128
chr12	104752133	104752147
chr12	104861626	104861640
chr12	105008894	105008908
chr12	108371515	108371529
chr12	108450177	108450191
chr12	108698815	108698829
chr12	110486164	110486178
chr12	110681329	110681343
chr12	110681365	110681379
chr12	110707072	110707086
chr12	110802208	110802222
chr12	111378000	111378014
chr12	111432202	111432216
chr12	111442688	111442702
chr12	111538787	111538801
chr12	111575175	111575189
chr12	111668737	111668751
chr12	111671049	111671063
chr12	111966967	111966981
chr12	112605783	112605797
chr12	112617695	112617709
chr12	112721773	112721787
chr12	112721967	112721981
chr12	112738113	112738127
chr12	112760589	112760603
chr12	112769140	112769154
chr12	112855121	112855135
chr12	113100741	113100755
chr12	113142409	113142423
chr12	113146591	113146605
chr12	117761998	117762012
chr13	3634269	3634283
chr13	8871502	8871516
chr13	9764783	9764797
chr13	13590404	13590418
chr13	14062915	14062929
chr13	14063728	14063742
chr13	14613125	14613139
chr13	14630097	14630111
chr13	17694774	17694788
chr13	17805593	17805607
chr13	17805842	17805856
chr13	20091679	20091693
chr13	23424249	23424263
chr13	23563305	23563319
chr13	23574265	23574279
chr13	23740246	23740260
chr13	24762080	24762094
chr13	24831376	24831390
chr13	29855204	29855218
chr13	30658364	30658378
chr13	34002078	34002092
chr13	34071464	34071478
chr13	34163581	34163595
chr13	37345152	37345166
chr13	37348225	37348239
chr13	38037002	38037016
chr13	41000117	41000131
chr13	41000325	41000339
chr13	41607813	41607827
chr13	41644140	41644154
chr13	41660659	41660673
chr13	42051449	42051463
chr13	42052032	42052046
chr13	42302818	42302832
chr13	43398368	43398382
chr13	43480186	43480200
chr13	43482028	43482042
chr13	43561312	43561326
chr13	43784942	43784956
chr13	45005992	45006006
chr13	45526509	45526523
chr13	46930677	46930691
chr13	47243471	47243485
chr13	48967220	48967234
chr13	48968781	48968795
chr13	49187060	49187074
chr13	49187202	49187216
chr13	49188315	49188329
chr13	49196762	49196776
chr13	51845183	51845197
chr13	52583631	52583645
chr13	52979949	52979963
chr13	53109636	53109650
chr13	54610818	54610832
chr13	54758788	54758802
chr13	55105443	55105457
chr13	55148913	55148927
chr13	55363214	55363228
chr13	55371550	55371564
chr13	55465415	55465429
chr13	55513426	55513440
chr13	55571137	55571151
chr13	56458301	56458315
chr13	56641936	56641950
chr13	58232923	58232937
chr13	58401756	58401770
chr13	58543270	58543284
chr13	59454630	59454644
chr13	59656563	59656577
chr13	59673654	59673668
chr13	60177939	60177953
chr13	63305031	63305045
chr13	63323745	63323759
chr13	63543160	63543174
chr13	64315584	64315598
chr13	65112092	65112106
chr13	65112187	65112201
chr13	66905162	66905176
chr13	69493053	69493067
chr13	70884772	70884786
chr13	73328371	73328385
chr13	73328454	73328468
chr13	73328610	73328624
chr13	73331270	73331284
chr13	74009880	74009894
chr13	74121379	74121393
chr13	74316931	74316945
chr13	76018743	76018757
chr13	77708602	77708616
chr13	77708838	77708852
chr13	78164004	78164018
chr13	78200424	78200438
chr13	86046366	86046380
chr13	91223781	91223795
chr13	92131857	92131871
chr13	92355264	92355278
chr13	92483573	92483587
chr13	92844761	92844775
chr13	93192430	93192444
chr13	95347136	95347150
chr13	96543078	96543092
chr13	96671267	96671281
chr13	98262808	98262822
chr13	98263500	98263514
chr13	98925240	98925254
chr13	100201808	100201822
chr13	100317392	100317406
chr13	100492254	100492268
chr13	100548520	100548534
chr13	100552949	100552963
chr13	100552992	100553006
chr13	100744726	100744740
chr13	101719788	101719802
chr13	101719960	101719974
chr13	101768773	101768787
chr13	104178733	104178747
chr13	112800891	112800905
chr13	113379196	113379210
chr13	113615557	113615571
chr13	113616207	113616221
chr13	113622718	113622732
chr13	115090700	115090714
chr13	117028337	117028351
chr13	118386636	118386650
chr13	119836322	119836336
chr14	7791753	7791767
chr14	7954239	7954253
chr14	11555356	11555370
chr14	11556423	11556437
chr14	12341118	12341132
chr14	13961245	13961259
chr14	13961574	13961588
chr14	14346542	14346556
chr14	16243366	16243380
chr14	16249738	16249752
chr14	16434619	16434633
chr14	17659338	17659352
chr14	17660767	17660781
chr14	18327389	18327403
chr14	18893053	18893067
chr14	19813243	19813257
chr14	19813376	19813390
chr14	20294313	20294327
chr14	20616782	20616796
chr14	20673911	20673925
chr14	20673957	20673971
chr14	20731565	20731579
chr14	20794457	20794471
chr14	21051923	21051937
chr14	21751583	21751597
chr14	21847753	21847767
chr14	21848267	21848281
chr14	25702122	25702136
chr14	25766418	25766432
chr14	28507755	28507769
chr14	30008830	30008844
chr14	30579344	30579358
chr14	30671367	30671381
chr14	30828300	30828314
chr14	30881497	30881511
chr14	30923630	30923644
chr14	31172996	31173010
chr14	31194938	31194952
chr14	31206953	31206967
chr14	31217876	31217890
chr14	31657099	31657113
chr14	32159519	32159533
chr14	32321797	32321811
chr14	32513387	32513401
chr14	32683738	32683752
chr14	33447494	33447508
chr14	34201729	34201743
chr14	34590441	34590455
chr14	34673465	34673479
chr14	40931583	40931597
chr14	45220957	45220971
chr14	45389327	45389341
chr14	46821480	46821494
chr14	46832554	46832568
chr14	46881058	46881072
chr14	47188069	47188083
chr14	47298605	47298619
chr14	50970469	50970483
chr14	51089949	51089963
chr14	51090052	51090066
chr14	51884856	51884870
chr14	51985482	51985496
chr14	52013935	52013949
chr14	52014874	52014888
chr14	52133788	52133802
chr14	52257964	52257978
chr14	52279288	52279302
chr14	52316692	52316706
chr14	54360799	54360813
chr14	54361107	54361121
chr14	54433022	54433036
chr14	54464662	54464676
chr14	54569159	54569173
chr14	54573022	54573036
chr14	54686457	54686471
chr14	54754644	54754658
chr14	54912493	54912507
chr14	54939775	54939789
chr14	55014580	55014594
chr14	55029119	55029133
chr14	55106669	55106683
chr14	55479110	55479124
chr14	55497631	55497645
chr14	55560758	55560772
chr14	55713690	55713704
chr14	55722164	55722178
chr14	55745590	55745604
chr14	55758415	55758429
chr14	55853916	55853930
chr14	55874098	55874112
chr14	55885850	55885864
chr14	56572057	56572071
chr14	56778662	56778676
chr14	57535020	57535034
chr14	57798237	57798251
chr14	58071959	58071973
chr14	58076533	58076547
chr14	59597444	59597458
chr14	63123826	63123840
chr14	63132292	63132306
chr14	63522639	63522653
chr14	64802222	64802236
chr14	64950389	64950403
chr14	64997709	64997723
chr14	65099007	65099021
chr14	65359003	65359017
chr14	65380642	65380656
chr14	65805811	65805825
chr14	65833785	65833799
chr14	66279241	66279255
chr14	66352009	66352023
chr14	66984085	66984099
chr14	67072861	67072875
chr14	67234447	67234461
chr14	70062719	70062733
chr14	70096523	70096537
chr14	70101597	70101611
chr14	70175918	70175932
chr14	70206018	70206032
chr14	70443687	70443701
chr14	70457357	70457371
chr14	70767787	70767801
chr14	73234689	73234703
chr14	73374509	73374523
chr14	73381882	73381896
chr14	73552625	73552639
chr14	73552640	73552654
chr14	74731945	74731959
chr14	74947694	74947708
chr14	75017476	75017490
chr14	75176573	75176587
chr14	75179025	75179039
chr14	76537031	76537045
chr14	76556954	76556968
chr14	78536603	78536617
chr14	78537057	78537071
chr14	78849682	78849696
chr14	79021906	79021920
chr14	79533636	79533650
chr14	84443914	84443928
chr14	99046660	99046674
chr14	99298671	99298685
chr14	101640592	101640606
chr14	103815617	103815631
chr14	103815695	103815709
chr14	105176550	105176564
chr14	105893733	105893747
chr14	111681613	111681627
chr14	118052212	118052226
chr14	118052240	118052254
chr14	118230977	118230991
chr14	121878372	121878386
chr14	121962104	121962118
chr14	122179606	122179620
chr14	122464396	122464410
chr14	122485418	122485432
chr15	3270922	3270936
chr15	3582176	3582190
chr15	6435943	6435957
chr15	6707827	6707841
chr15	6708489	6708503
chr15	6871460	6871474
chr15	7129997	7130011
chr15	8446047	8446061
chr15	8446372	8446386
chr15	10486171	10486185
chr15	12117877	12117891
chr15	18821341	18821355
chr15	27630720	27630734
chr15	27665579	27665593
chr15	27874085	27874099
chr15	31367468	31367482
chr15	31601451	31601465
chr15	32246249	32246263
chr15	33687738	33687752
chr15	34529836	34529850
chr15	35928705	35928719
chr15	36496318	36496332
chr15	36500063	36500077
chr15	36608618	36608632
chr15	36794161	36794175
chr15	36794384	36794398
chr15	36873457	36873471
chr15	37007687	37007701
chr15	38933042	38933056
chr15	39019008	39019022
chr15	39813927	39813941
chr15	39816106	39816120
chr15	39907231	39907245
chr15	41447977	41447991
chr15	43477284	43477298
chr15	44427967	44427981
chr15	44439231	44439245
chr15	51865912	51865926
chr15	51991590	51991604
chr15	53343525	53343539
chr15	54745918	54745932
chr15	55072144	55072158
chr15	57696293	57696307
chr15	58011601	58011615
chr15	58076237	58076251
chr15	58141466	58141480
chr15	58888665	58888679
chr15	61987549	61987563
chr15	64383002	64383016
chr15	68928139	68928153
chr15	68928158	68928172
chr15	68929180	68929194
chr15	73202279	73202293
chr15	74975383	74975397
chr15	76009817	76009831
chr15	76092004	76092018
chr15	76229653	76229667
chr15	76313419	76313433
chr15	76336225	76336239
chr15	76626447	76626461
chr15	76679130	76679144
chr15	76722295	76722309
chr15	76723702	76723716
chr15	76724264	76724278
chr15	76765946	76765960
chr15	76908244	76908258
chr15	77523393	77523407
chr15	77801047	77801061
chr15	77956464	77956478
chr15	78158457	78158471
chr15	78158475	78158489
chr15	78355243	78355257
chr15	78384788	78384802
chr15	78435192	78435206
chr15	78531808	78531822
chr15	78531945	78531959
chr15	78778712	78778726
chr15	78942821	78942835
chr15	79071735	79071749
chr15	79109632	79109646
chr15	79328024	79328038
chr15	79354741	79354755
chr15	79607900	79607914
chr15	80004987	80005001
chr15	80015259	80015273
chr15	80704589	80704603
chr15	81009060	81009074
chr15	81796301	81796315
chr15	81811800	81811814
chr15	81839030	81839044
chr15	81871910	81871924
chr15	81872228	81872242
chr15	81872267	81872281
chr15	81985310	81985324
chr15	82016353	82016367
chr15	82047282	82047296
chr15	82255941	82255955
chr15	82379722	82379736
chr15	82380577	82380591
chr15	83223759	83223773
chr15	83583655	83583669
chr15	84231725	84231739
chr15	85821937	85821951
chr15	86166281	86166295
chr15	86166341	86166355
chr15	86214669	86214683
chr15	88819582	88819596
chr15	88861798	88861812
chr15	88868071	88868085
chr15	88978976	88978990
chr15	89122889	89122903
chr15	89180556	89180570
chr15	89195905	89195919
chr15	89429365	89429379
chr15	89497746	89497760
chr15	89500463	89500477
chr15	91050071	91050085
chr15	91191886	91191900
chr15	93552525	93552539
chr15	96642284	96642298
chr15	97729179	97729193
chr15	98134018	98134032
chr15	98710565	98710579
chr15	98831647	98831661
chr15	98880979	98880993
chr15	99028963	99028977
chr15	99093744	99093758
chr15	99126306	99126320
chr15	100304519	100304533
chr15	100422929	100422943
chr15	100761374	100761388
chr15	100762201	100762215
chr15	100870339	100870353
chr15	101123436	101123450
chr15	101134722	101134736
chr15	101145503	101145517
chr15	101146660	101146674
chr15	101262509	101262523
chr15	101283713	101283727
chr15	101372220	101372234
chr15	102073428	102073442
chr15	102102667	102102681
chr15	102150840	102150854
chr15	102517424	102517438
chr15	102572314	102572328
chr15	103240854	103240868
chr15	103250407	103250421
chr15	103258285	103258299
chr15	103305782	103305796
chr15	103315244	103315258
chr15	103339681	103339695
chr15	103537172	103537186
chr15	103538068	103538082
chr16	3884381	3884395
chr16	4077946	4077960
chr16	4624923	4624937
chr16	4644255	4644269
chr16	4722984	4722998
chr16	4880829	4880843
chr16	4886966	4886980
chr16	4887296	4887310
chr16	4912970	4912984
chr16	8470944	8470958
chr16	8738922	8738936
chr16	10399418	10399432
chr16	10861477	10861491
chr16	10890535	10890549
chr16	11203279	11203293
chr16	11315228	11315242
chr16	11322600	11322614
chr16	13257139	13257153
chr16	14705771	14705785
chr16	15889865	15889879
chr16	16017409	16017423
chr16	16983010	16983024
chr16	17132675	17132689
chr16	17276113	17276127
chr16	17497040	17497054
chr16	17509100	17509114
chr16	17509145	17509159
chr16	18089505	18089519
chr16	18234339	18234353
chr16	18248705	18248719
chr16	18268368	18268382
chr16	18776535	18776549
chr16	20426627	20426641
chr16	20509554	20509568
chr16	20696378	20696392
chr16	21216306	21216320
chr16	21640914	21640928
chr16	21946834	21946848
chr16	23224802	23224816
chr16	23984768	23984782
chr16	30390278	30390292
chr16	30513713	30513727
chr16	30550874	30550888
chr16	30599447	30599461
chr16	31932230	31932244
chr16	31948234	31948248
chr16	32163649	32163663
chr16	33055978	33055992
chr16	33056389	33056403
chr16	34667408	34667422
chr16	35155988	35156002
chr16	35869365	35869379
chr16	36665897	36665911
chr16	36934342	36934356
chr16	37851564	37851578
chr16	38341918	38341932
chr16	38346881	38346895
chr16	38452478	38452492
chr16	38506369	38506383
chr16	38592220	38592234
chr16	43889594	43889608
chr16	44139265	44139279
chr16	44139553	44139567
chr16	44139824	44139838
chr16	44242748	44242762
chr16	45250671	45250685
chr16	45630551	45630565
chr16	46498093	46498107
chr16	55820378	55820392
chr16	56717914	56717928
chr16	57121712	57121726
chr16	59471656	59471670
chr16	59638930	59638944
chr16	78541081	78541095
chr16	84834652	84834666
chr16	84834713	84834727
chr16	84836291	84836305
chr16	85803358	85803372
chr16	87440525	87440539
chr16	87698682	87698696
chr16	90498257	90498271
chr16	90924908	90924922
chr16	90934541	90934555
chr16	91044613	91044627
chr16	91269735	91269749
chr16	91561978	91561992
chr16	93682515	93682529
chr16	93832469	93832483
chr17	5935231	5935245
chr17	8101330	8101344
chr17	8282864	8282878
chr17	8310767	8310781
chr17	10402092	10402106
chr17	12940595	12940609
chr17	12960983	12960997
chr17	12992540	12992554
chr17	13761696	13761710
chr17	15564605	15564619
chr17	15812675	15812689
chr17	15826839	15826853
chr17	21008647	21008661
chr17	21567106	21567120
chr17	21909549	21909563
chr17	21962809	21962823
chr17	22165814	22165828
chr17	22361697	22361711
chr17	23571357	23571371
chr17	23586053	23586067
chr17	23673829	23673843
chr17	23676673	23676687
chr17	23682291	23682305
chr17	24152244	24152258
chr17	24171944	24171958
chr17	24429245	24429259
chr17	24454600	24454614
chr17	24478505	24478519
chr17	24644830	24644844
chr17	24645381	24645395
chr17	24724194	24724208
chr17	24737086	24737100
chr17	24737277	24737291
chr17	24742430	24742444
chr17	24936321	24936335
chr17	25079558	25079572
chr17	25273828	25273842
chr17	25471472	25471486
chr17	25561997	25562011
chr17	25578829	25578843
chr17	25785280	25785294
chr17	25833531	25833545
chr17	26547833	26547847
chr17	26715989	26716003
chr17	26716494	26716508
chr17	26716761	26716775
chr17	26932063	26932077
chr17	27028161	27028175
chr17	27124008	27124022
chr17	27204620	27204634
chr17	27565915	27565929
chr17	27679354	27679368
chr17	27820958	27820972
chr17	27907682	27907696
chr17	28079648	28079662
chr17	28218168	28218182
chr17	28512868	28512882
chr17	28691081	28691095
chr17	28720965	28720979
chr17	29007482	29007496
chr17	29094457	29094471
chr17	29360789	29360803
chr17	29614568	29614582
chr17	29716778	29716792
chr17	29716838	29716852
chr17	31058633	31058647
chr17	31119740	31119754
chr17	31138681	31138695
chr17	31296126	31296140
chr17	31639894	31639908
chr17	31856338	31856352
chr17	31856771	31856785
chr17	32051975	32051989
chr17	32335938	32335952
chr17	32536375	32536389
chr17	32829888	32829902
chr17	33092535	33092549
chr17	33555583	33555597
chr17	33779295	33779309
chr17	33828885	33828899
chr17	33843583	33843597
chr17	33999708	33999722
chr17	34000472	34000486
chr17	34027387	34027401
chr17	34027878	34027892
chr17	34038695	34038709
chr17	34235048	34235062
chr17	34603666	34603680
chr17	34604155	34604169
chr17	34850009	34850023
chr17	34900045	34900059
chr17	34972547	34972561
chr17	35023956	35023970
chr17	35027348	35027362
chr17	35050112	35050126
chr17	35065175	35065189
chr17	35079964	35079978
chr17	35262894	35262908
chr17	35556930	35556944
chr17	35667958	35667972
chr17	35821824	35821838
chr17	35861817	35861831
chr17	35869686	35869700
chr17	35870514	35870528
chr17	35909746	35909760
chr17	35909791	35909805
chr17	35916208	35916222
chr17	35917978	35917992
chr17	35970073	35970087
chr17	35979603	35979617
chr17	36023972	36023986
chr17	36035579	36035593
chr17	36947061	36947075
chr17	37045586	37045600
chr17	37072608	37072622
chr17	37270336	37270350
chr17	43569469	43569483
chr17	45555909	45555923
chr17	45584385	45584399
chr17	45733135	45733149
chr17	46030856	46030870
chr17	46032952	46032966
chr17	46132217	46132231
chr17	46153869	46153883
chr17	46203119	46203133
chr17	46484159	46484173
chr17	46637132	46637146
chr17	46704811	46704825
chr17	46773510	46773524
chr17	47432574	47432588
chr17	47441640	47441654
chr17	47508415	47508429
chr17	47629980	47629994
chr17	47694820	47694834
chr17	47695147	47695161
chr17	47731017	47731031
chr17	47760150	47760164
chr17	47792841	47792855
chr17	48418470	48418484
chr17	48427227	48427241
chr17	49615202	49615216
chr17	53544013	53544027
chr17	53544071	53544085
chr17	56106335	56106349
chr17	56109745	56109759
chr17	56134010	56134024
chr17	56218892	56218906
chr17	56265305	56265319
chr17	56266041	56266055
chr17	56287957	56287971
chr17	56287996	56288010
chr17	56290429	56290443
chr17	56443402	56443416
chr17	56584014	56584028
chr17	56627047	56627061
chr17	56627268	56627282
chr17	56672850	56672864
chr17	56717988	56718002
chr17	56762037	56762051
chr17	56831232	56831246
chr17	56990575	56990589
chr17	57032051	57032065
chr17	57276496	57276510
chr17	57280699	57280713
chr17	59013390	59013404
chr17	63500637	63500651
chr17	65540781	65540795
chr17	65784015	65784029
chr17	66123430	66123444
chr17	67353116	67353130
chr17	67837708	67837722
chr17	69384454	69384468
chr17	70851516	70851530
chr17	70990849	70990863
chr17	71184944	71184958
chr17	72836120	72836134
chr17	72918793	72918807
chr17	73107682	73107696
chr17	74717847	74717861
chr17	75536595	75536609
chr17	78916352	78916366
chr17	79354653	79354667
chr17	79355271	79355285
chr17	79355995	79356009
chr17	80048443	80048457
chr17	80289908	80289922
chr17	80290201	80290215
chr17	83214530	83214544
chr17	83830699	83830713
chr17	84509257	84509271
chr17	84698866	84698880
chr17	85023883	85023897
chr17	86145880	86145894
chr17	86166737	86166751
chr17	86754161	86754175
chr17	86964943	86964957
chr17	87107108	87107122
chr17	87265787	87265801
chr17	87282219	87282233
chr17	87377661	87377675
chr17	87446468	87446482
chr17	87770893	87770907
chr17	87985070	87985084
chr17	88462845	88462859
chr17	88630155	88630169
chr17	91092664	91092678
chr18	3337659	3337673
chr18	4375587	4375601
chr18	4635532	4635546
chr18	5334101	5334115
chr18	5335157	5335171
chr18	5591224	5591238
chr18	6136684	6136698
chr18	7627017	7627031
chr18	9958590	9958604
chr18	10706437	10706451
chr18	10725259	10725273
chr18	12121090	12121104
chr18	12128359	12128373
chr18	12168225	12168239
chr18	12168262	12168276
chr18	12306004	12306018
chr18	12741220	12741234
chr18	13970203	13970217
chr18	14783145	14783159
chr18	15150224	15150238
chr18	16588853	16588867
chr18	16588910	16588924
chr18	16703574	16703588
chr18	20961255	20961269
chr18	23752055	23752069
chr18	23753410	23753424
chr18	24021776	24021790
chr18	24116385	24116399
chr18	24121421	24121435
chr18	24122015	24122029
chr18	24653699	24653713
chr18	25169087	25169101
chr18	32067388	32067402
chr18	32377769	32377783
chr18	34840364	34840378
chr18	34855555	34855569
chr18	35213323	35213337
chr18	35598840	35598854
chr18	35598876	35598890
chr18	35847950	35847964
chr18	36377717	36377731
chr18	36516097	36516111
chr18	36679551	36679565
chr18	36726808	36726822
chr18	36744547	36744561
chr18	37825426	37825440
chr18	37955186	37955200
chr18	38418740	38418754
chr18	38929565	38929579
chr18	41951292	41951306
chr18	49978978	49978992
chr18	53744668	53744682
chr18	56708714	56708728
chr18	60624677	60624691
chr18	60803833	60803847
chr18	60844220	60844234
chr18	60849480	60849494
chr18	61107913	61107927
chr18	61189931	61189945
chr18	61400919	61400933
chr18	61535021	61535035
chr18	61535893	61535907
chr18	61536115	61536129
chr18	61554871	61554885
chr18	61758744	61758758
chr18	63708980	63708994
chr18	65431243	65431257
chr18	65582092	65582106
chr18	65697841	65697855
chr18	65752186	65752200
chr18	66040203	66040217
chr18	67641715	67641729
chr18	67724161	67724175
chr18	67800035	67800049
chr18	70472558	70472572
chr18	70568991	70569005
chr18	73674266	73674280
chr18	73863443	73863457
chr18	74064694	74064708
chr18	74207973	74207987
chr18	75283292	75283306
chr18	75284750	75284764
chr18	77279334	77279348
chr18	78212281	78212295
chr18	80042232	80042246
chr18	80206898	80206912
chr18	80715251	80715265
chr18	80715349	80715363
chr18	84091762	84091776
chr18	84685768	84685782
chr18	86710666	86710680
chr18	89769378	89769392
chr19	3324016	3324030
chr19	3325498	3325512
chr19	3325651	3325665
chr19	3388867	3388881
chr19	3635009	3635023
chr19	3906314	3906328
chr19	3912404	3912418
chr19	3912489	3912503
chr19	3912628	3912642
chr19	3914593	3914607
chr19	3929386	3929400
chr19	3946803	3946817
chr19	4012770	4012784
chr19	4257840	4257854
chr19	4294868	4294882
chr19	4300373	4300387
chr19	4306468	4306482
chr19	4310112	4310126
chr19	4397640	4397654
chr19	4755743	4755757
chr19	4811699	4811713
chr19	4820773	4820787
chr19	4962193	4962207
chr19	4962312	4962326
chr19	5050429	5050443
chr19	5050907	5050921
chr19	5108280	5108294
chr19	5274456	5274470
chr19	5425432	5425446
chr19	5457929	5457943
chr19	5488372	5488386
chr19	5489320	5489334
chr19	5510639	5510653
chr19	5567431	5567445
chr19	5568738	5568752
chr19	5572930	5572944
chr19	5688568	5688582
chr19	5689030	5689044
chr19	5689745	5689759
chr19	5724925	5724939
chr19	5877770	5877784
chr19	5946361	5946375
chr19	5952446	5952460
chr19	5989171	5989185
chr19	6058187	6058201
chr19	6077483	6077497
chr19	6127865	6127879
chr19	6140553	6140567
chr19	6235570	6235584
chr19	6241487	6241501
chr19	6304806	6304820
chr19	6340485	6340499
chr19	6349309	6349323
chr19	6349501	6349515
chr19	6388075	6388089
chr19	6970112	6970126
chr19	6974807	6974821
chr19	6975012	6975026
chr19	6976299	6976313
chr19	7039590	7039604
chr19	7040055	7040069
chr19	7057935	7057949
chr19	7121494	7121508
chr19	7342139	7342153
chr19	7557904	7557918
chr19	8723217	8723231
chr19	8756739	8756753
chr19	8807028	8807042
chr19	8840656	8840670
chr19	8871212	8871226
chr19	8929542	8929556
chr19	8942289	8942303
chr19	10182505	10182519
chr19	10183320	10183334
chr19	10188193	10188207
chr19	10305800	10305814
chr19	10525880	10525894
chr19	10689219	10689233
chr19	10710136	10710150
chr19	10869527	10869541
chr19	11770275	11770289
chr19	12436353	12436367
chr19	12502223	12502237
chr19	12795760	12795774
chr19	15904885	15904899
chr19	16132285	16132299
chr19	18670704	18670718
chr19	18687693	18687707
chr19	18713275	18713289
chr19	21778290	21778304
chr19	23142297	23142311
chr19	23163638	23163652
chr19	24284372	24284386
chr19	24672950	24672964
chr19	24673951	24673965
chr19	27429908	27429922
chr19	27430054	27430068
chr19	28964265	28964279
chr19	29101377	29101391
chr19	29372248	29372262
chr19	29522859	29522873
chr19	31764525	31764539
chr19	31765286	31765300
chr19	32127456	32127470
chr19	32756506	32756520
chr19	34192980	34192994
chr19	34195785	34195799
chr19	34526661	34526675
chr19	34878158	34878172
chr19	36554279	36554293
chr19	36554305	36554319
chr19	37550846	37550860
chr19	38260706	38260720
chr19	38261415	38261429
chr19	38836435	38836449
chr19	41086312	41086326
chr19	41088378	41088392
chr19	41381713	41381727
chr19	41764045	41764059
chr19	42035359	42035373
chr19	42089949	42089963
chr19	42128738	42128752
chr19	42144716	42144730
chr19	42518865	42518879
chr19	42519038	42519052
chr19	43524149	43524163
chr19	44070095	44070109
chr19	44107777	44107791
chr19	44246453	44246467
chr19	44295988	44296002
chr19	44333071	44333085
chr19	45783642	45783656
chr19	46039965	46039979
chr19	46044506	46044520
chr19	46076064	46076078
chr19	46304644	46304658
chr19	46356553	46356567
chr19	46528990	46529004
chr19	46707433	46707447
chr19	46707568	46707582
chr19	47090229	47090243
chr19	47536911	47536925
chr19	47580462	47580476
chr19	47647006	47647020
chr19	53390759	53390773
chr19	55218564	55218578
chr19	56955638	56955652
chr19	57314510	57314524
chr19	57361488	57361502
chr19	59074702	59074716
chr19	59075771	59075785
chr19	59454345	59454359
chr19	60874715	60874729
chr19	61140746	61140760
chr2	3118150	3118164
chr2	3513330	3513344
chr2	5942912	5942926
chr2	5950914	5950928
chr2	10098793	10098807
chr2	10153433	10153447
chr2	11172031	11172045
chr2	11239640	11239654
chr2	11778452	11778466
chr2	12419615	12419629
chr2	13170156	13170170
chr2	13271588	13271602
chr2	13544817	13544831
chr2	14074251	14074265
chr2	16356844	16356858
chr2	18027340	18027354
chr2	18672437	18672451
chr2	21205279	21205293
chr2	23068590	23068604
chr2	24919143	24919157
chr2	24919781	24919795
chr2	24975577	24975591
chr2	25178621	25178635
chr2	25394493	25394507
chr2	25396288	25396302
chr2	25430958	25430972
chr2	25500445	25500459
chr2	25501007	25501021
chr2	25534241	25534255
chr2	25558229	25558243
chr2	25581268	25581282
chr2	25815648	25815662
chr2	25843263	25843277
chr2	25850557	25850571
chr2	26119087	26119101
chr2	26119912	26119926
chr2	26237374	26237388
chr2	26316204	26316218
chr2	26483454	26483468
chr2	26941627	26941641
chr2	27246972	27246986
chr2	27263129	27263143
chr2	27476443	27476457
chr2	27504707	27504721
chr2	28467872	28467886
chr2	28517440	28517454
chr2	29620406	29620420
chr2	29843767	29843781
chr2	30077469	30077483
chr2	30106600	30106614
chr2	30133314	30133328
chr2	30266843	30266857
chr2	30343663	30343677
chr2	30392363	30392377
chr2	30392828	30392842
chr2	30415443	30415457
chr2	30595083	30595097
chr2	30934375	30934389
chr2	30967475	30967489
chr2	30968189	30968203
chr2	30982246	30982260
chr2	31025633	31025647
chr2	31152301	31152315
chr2	31246685	31246699
chr2	31745903	31745917
chr2	32083852	32083866
chr2	32084954	32084968
chr2	32288415	32288429
chr2	32362785	32362799
chr2	32590450	32590464
chr2	32608970	32608984
chr2	32609023	32609037
chr2	32621293	32621307
chr2	32629672	32629686
chr2	32661810	32661824
chr2	32715053	32715067
chr2	32715464	32715478
chr2	32742352	32742366
chr2	32775224	32775238
chr2	32928328	32928342
chr2	33130838	33130852
chr2	33430952	33430966
chr2	33467733	33467747
chr2	34771800	34771814
chr2	35110088	35110102
chr2	35337718	35337732
chr2	38366231	38366245
chr2	38366441	38366455
chr2	38725588	38725602
chr2	44926484	44926498
chr2	48814324	48814338
chr2	48948888	48948902
chr2	49453067	49453081
chr2	51147540	51147554
chr2	52998156	52998170
chr2	53191268	53191282
chr2	58567731	58567745
chr2	59160357	59160371
chr2	59258960	59258974
[truncated: 1,909 more rows]

## Sheet: Overlapping_peak
CHIP_peak_chr	CHIP_peak_start	CHIP_peak_end	ATAC_TFBS_chr	ATAC_TFBS_start	ATAC_TFBS_end	ATAC_TFBS_name	ATAC_TFBS_score	ATAC_TFBS_strand	ATAC_peak_chr	ATAC_peak_start	ATAC_peak_end	ATAC_peak_id	ATAC_feature	ATAC_feat_start	ATAC_feat_end	ATAC_feat_strand	ATAC_feat_anchor	ATAC_distance	ATAC_relative_location	ATAC_feat_ovl_peak	ATAC_peak_ovl_feat	ATAC_ID	ATAC_gene_id	ATAC_gene_name	ATAC_gene_status	ATAC_gene_type
chr16	31939786	31939835	chr16	31948234	31948248	Rxra_MA0512.2	3.42999	-	chr16	31947188	31949166	peak_146086	gene	31947049	31948494	-	start	317	OverlapStart	0.66	0.904	ENSMUSG00000107002.1	ENSMUSG00000107002.1	0610012G03Rik	KNOWN	protein_coding
chr16	31943204	31943253	chr16	31948234	31948248	Rxra_MA0512.2	3.42999	-	chr16	31947188	31949166	peak_146086	gene	31947049	31948494	-	start	317	OverlapStart	0.66	0.904	ENSMUSG00000107002.1	ENSMUSG00000107002.1	0610012G03Rik	KNOWN	protein_coding
chr16	31945634	31945745	chr16	31948234	31948248	Rxra_MA0512.2	3.42999	-	chr16	31947188	31949166	peak_146086	gene	31947049	31948494	-	start	317	OverlapStart	0.66	0.904	ENSMUSG00000107002.1	ENSMUSG00000107002.1	0610012G03Rik	KNOWN	protein_coding
chr9	94533803	94533852	chr9	94537236	94537250	Rxra_MA0512.2	4.50171	+	chr9	94537101	94539002	peak_370059	gene	94517863	94538081	-	start	30	OverlapStart	0.516	0.048	ENSMUSG00000045414.7	ENSMUSG00000045414.7	1190002N15Rik	KNOWN	protein_coding
chr12	110689822	110689871	chr12	110681329	110681343	Rxra_MA0512.2	4.39312	+	chr12	110680937	110683214	peak_87282	gene	110667688	110682619	-	start	544	OverlapStart	0.739	0.113	ENSMUSG00000056508.5	ENSMUSG00000056508.5	1700001K19Rik	KNOWN	protein_coding
chr12	110689822	110689871	chr12	110681365	110681379	Rxra_MA0512.2	3.64946	-	chr12	110680937	110683214	peak_87282	gene	110667688	110682619	-	start	544	OverlapStart	0.739	0.113	ENSMUSG00000056508.5	ENSMUSG00000056508.5	1700001K19Rik	KNOWN	protein_coding
chr9	57260979	57261069	chr9	57259889	57259903	Rxra_MA0512.2	7.04571	+	chr9	57259806	57260156	peak_363646	gene	57252321	57262599	-	center	2521	PeakInsideFeature	1	0.034	ENSMUSG00000032300.6	ENSMUSG00000032300.6	1700017B05Rik	KNOWN	protein_coding
chr9	57260979	57261069	chr9	57262871	57262885	Rxra_MA0512.2	10.014	-	chr9	57261074	57263118	peak_363647	gene	57252321	57262599	-	start	503	OverlapStart	0.746	0.148	ENSMUSG00000032300.6	ENSMUSG00000032300.6	1700017B05Rik	KNOWN	protein_coding
chr10	43542789	43542838	chr10	43540674	43540688	Rxra_MA0512.2	5.43862	+	chr10	43540306	43541289	peak_34949	gene	43525120	43540994	-	start	197	OverlapStart	0.7	0.043	ENSMUSG00000019797.10	ENSMUSG00000019797.10	1700021F05Rik	KNOWN	protein_coding
chr4	104910305	104910354	chr4	104911932	104911946	Rxra_MA0512.2	2.76624	-	chr4	104911607	104912062	peak_257620	gene	104913455	105016863	+	start	1621	Upstream	0	0	ENSMUSG00000078612.9	ENSMUSG00000078612.9	1700024P16Rik	KNOWN	protein_coding
chr11	85188092	85188141	chr11	85183039	85183053	Rxra_MA0512.2	3.95273	-	chr11	85182580	85184488	peak_63036	gene	85170403	85181145	+	end	2389	Downstream	0	0	ENSMUSG00000018479.12	ENSMUSG00000018479.12	1700125H20Rik	KNOWN	protein_coding
chr11	120094258	120094307	chr11	120101208	120101222	Rxra_MA0512.2	3.49666	+	chr11	120101018	120101317	peak_70514	gene	120098927	120100705	+	end	462	Downstream	0	0	ENSMUSG00000078572.3	ENSMUSG00000078572.3	1810043H04Rik	KNOWN	protein_coding
chr17	46772775	46772824	chr17	46773510	46773524	Rxra_MA0512.2	6.03467	+	chr17	46772139	46774191	peak_162384	gene	46772634	46773407	+	center	145	FeatureInsidePeak	0.377	1	ENSMUSG00000062619.5	ENSMUSG00000062619.5	2310039H08Rik	KNOWN	protein_coding
chr7	131359473	131359522	chr7	131362741	131362755	Rxra_MA0512.2	7.45551	+	chr7	131362135	131363495	peak_332587	gene	131338219	131362759	-	start	56	OverlapStart	0.459	0.025	ENSMUSG00000040177.10	ENSMUSG00000040177.10	2310057M21Rik	KNOWN	protein_coding
chr2	84661618	84661667	chr2	84670667	84670681	Rxra_MA0512.2	2.74106	+	chr2	84669971	84671818	peak_206442	gene	84669214	84670770	-	start	124	OverlapStart	0.433	0.513	ENSMUSG00000076437.10	ENSMUSG00000076437.10	2700094K13Rik	KNOWN	protein_coding
chr2	84669687	84669752	chr2	84670667	84670681	Rxra_MA0512.2	2.74106	+	chr2	84669971	84671818	peak_206442	gene	84669214	84670770	-	start	124	OverlapStart	0.433	0.513	ENSMUSG00000076437.10	ENSMUSG00000076437.10	2700094K13Rik	KNOWN	protein_coding
chr1	16098422	16098471	chr1	16091821	16091835	Rxra_MA0512.2	2.71658	+	chr1	16091645	16093824	peak_1337	gene	16065978	16093325	-	start	591	OverlapStart	0.771	0.061	ENSMUSG00000067795.13	ENSMUSG00000067795.13	4930444P10Rik	KNOWN	protein_coding
chr8	105698870	105698919	chr8	105708226	105708240	Rxra_MA0512.2	10.1243	+	chr8	105707600	105708646	peak_349982	gene	105708290	105710244	+	start	167	OverlapStart	0.34	0.182	ENSMUSG00000013158.5	ENSMUSG00000013158.5	4933405L10Rik	KNOWN	protein_coding
chr10	93582554	93582603	chr10	93589668	93589682	Rxra_MA0512.2	13.2843	-	chr10	93588912	93590106	peak_42721	gene	93589412	93605245	+	start	97	OverlapStart	0.581	0.044	ENSMUSG00000097407.1	ENSMUSG00000097407.1	4933408J17Rik	KNOWN	protein_coding
chr11	81864076	81864125	chr11	81860628	81860642	Rxra_MA0512.2	7.13121	-	chr11	81860360	81861417	peak_62337	gene	81860672	81894582	+	start	216	OverlapStart	0.705	0.022	ENSMUSG00000020703.3	ENSMUSG00000020703.3	5530401A14Rik	KNOWN	protein_coding
chr4	63560218	63560267	chr4	63558690	63558704	Rxra_MA0512.2	4.79229	-	chr4	63558276	63560489	peak_252266	gene	63558780	63586357	+	start	602	OverlapStart	0.772	0.062	ENSMUSG00000045917.17	ENSMUSG00000045917.17	6330416G13Rik	KNOWN	protein_coding
chr4	63560218	63560267	chr4	63558907	63558921	Rxra_MA0512.2	2.71047	+	chr4	63558276	63560489	peak_252266	gene	63558780	63586357	+	start	602	OverlapStart	0.772	0.062	ENSMUSG00000045917.17	ENSMUSG00000045917.17	6330416G13Rik	KNOWN	protein_coding
chr4	63573453	63573502	chr4	63570716	63570730	Rxra_MA0512.2	3.09833	+	chr4	63569372	63571481	peak_252269	gene	63558780	63586357	+	center	2142	PeakInsideFeature	1	0.076	ENSMUSG00000045917.17	ENSMUSG00000045917.17	6330416G13Rik	KNOWN	protein_coding
chr13	70883278	70883327	chr13	70884772	70884786	Rxra_MA0512.2	4.71982	-	chr13	70883343	70885732	peak_99574	gene	70882947	70884503	+	end	34	OverlapEnd	0.486	0.746	ENSMUSG00000021600.3	ENSMUSG00000021600.3	8030423J24Rik	KNOWN	protein_coding
chr11	69118707	69118756	chr11	69118868	69118882	Rxra_MA0512.2	2.91454	+	chr11	69117639	69119099	peak_59388	gene	69120053	69122589	-	end	1684	Downstream	0	0	ENSMUSG00000097386.1	ENSMUSG00000097386.1	9130213A22Rik	KNOWN	protein_coding
chr4	156111962	156112011	chr4	156109401	156109415	Rxra_MA0512.2	4.21971	-	chr4	156109271	156110270	peak_267982	gene	156109981	156127265	+	start	211	OverlapStart	0.289	0.017	ENSMUSG00000059939.13	ENSMUSG00000059939.13	9430015G10Rik	KNOWN	protein_coding
chr4	156115472	156115531	chr4	156109401	156109415	Rxra_MA0512.2	4.21971	-	chr4	156109271	156110270	peak_267982	gene	156109981	156127265	+	start	211	OverlapStart	0.289	0.017	ENSMUSG00000059939.13	ENSMUSG00000059939.13	9430015G10Rik	KNOWN	protein_coding
chr4	156117270	156117319	chr4	156109401	156109415	Rxra_MA0512.2	4.21971	-	chr4	156109271	156110270	peak_267982	gene	156109981	156127265	+	start	211	OverlapStart	0.289	0.017	ENSMUSG00000059939.13	ENSMUSG00000059939.13	9430015G10Rik	KNOWN	protein_coding
chr11	120042774	120042823	chr11	120048075	120048089	Rxra_MA0512.2	8.73893	+	chr11	120045841	120049448	peak_70499	gene	120007312	120047167	-	start	477	OverlapStart	0.368	0.033	ENSMUSG00000025375.15	ENSMUSG00000025375.15	Aatk	KNOWN	protein_coding
chr11	120042774	120042823	chr11	120051401	120051415	Rxra_MA0512.2	2.91027	+	chr11	120051137	120052606	peak_70500	gene	120007312	120047167	-	start	4704	Upstream	0	0	ENSMUSG00000025375.15	ENSMUSG00000025375.15	Aatk	KNOWN	protein_coding
chr5	124059361	124059410	chr5	124058799	124058813	Rxra_MA0512.2	3.87716	-	chr5	124058625	124060599	peak_286504	gene	124061529	124095798	-	end	1917	Downstream	0	0	ENSMUSG00000029408.13	ENSMUSG00000029408.13	Abcb9	KNOWN	protein_coding
chr5	124065778	124065827	chr5	124058799	124058813	Rxra_MA0512.2	3.87716	-	chr5	124058625	124060599	peak_286504	gene	124061529	124095798	-	end	1917	Downstream	0	0	ENSMUSG00000029408.13	ENSMUSG00000029408.13	Abcb9	KNOWN	protein_coding
chr17	31127764	31127823	chr17	31119740	31119754	Rxra_MA0512.2	2.93852	+	chr17	31118707	31120107	peak_160171	gene	31057697	31115777	+	end	3630	Downstream	0	0	ENSMUSG00000024030.6	ENSMUSG00000024030.6	Abcg1	KNOWN	protein_coding
chr9	106445787	106445836	chr9	106448002	106448016	Rxra_MA0512.2	3.66702	+	chr9	106447285	106449065	peak_372447	gene	106447787	106452922	+	start	388	OverlapStart	0.718	0.249	ENSMUSG00000042073.14	ENSMUSG00000042073.14	Abhd14b	KNOWN	protein_coding
chr9	106445787	106445836	chr9	106448546	106448560	Rxra_MA0512.2	3.62217	+	chr9	106447285	106449065	peak_372447	gene	106447787	106452922	+	start	388	OverlapStart	0.718	0.249	ENSMUSG00000042073.14	ENSMUSG00000042073.14	Abhd14b	KNOWN	protein_coding
chr5	35762369	35762418	chr5	35755515	35755529	Rxra_MA0512.2	2.67716	+	chr5	35755311	35755745	peak_273152	gene	35757879	35884973	+	start	2351	Upstream	0	0	ENSMUSG00000029095.17	ENSMUSG00000029095.17	Ablim2	KNOWN	protein_coding
chr5	114148085	114148134	chr5	114146162	114146176	Rxra_MA0512.2	9.54331	-	chr5	114145607	114148012	peak_284157	gene	114146534	114250761	+	start	275	OverlapStart	0.615	0.014	ENSMUSG00000042010.16	ENSMUSG00000042010.16	Acacb	KNOWN	protein_coding
chr17	12934500	12934549	chr17	12940595	12940609	Rxra_MA0512.2	3.5342	-	chr17	12939323	12941153	peak_157377	gene	12923832	12940402	-	start	164	OverlapStart	0.59	0.065	ENSMUSG00000062480.11	ENSMUSG00000062480.11	Acat3	KNOWN	protein_coding
chr1	180729752	180729801	chr1	180726029	180726043	Rxra_MA0512.2	9.40106	+	chr1	180725369	180726642	peak_25722	gene	180726042	180754204	+	start	37	OverlapStart	0.471	0.021	ENSMUSG00000026499.5	ENSMUSG00000026499.5	Acbd3	KNOWN	protein_coding
chr1	155558141	155558190	chr1	155558054	155558068	Rxra_MA0512.2	3.60505	-	chr1	155557665	155558999	peak_20873	gene	155558119	155691330	+	start	213	OverlapStart	0.66	0.006	ENSMUSG00000033701.13	ENSMUSG00000033701.13	Acbd6	KNOWN	protein_coding
chr11	116206111	116206160	chr11	116198980	116198994	Rxra_MA0512.2	11.2465	+	chr11	116198389	116199608	peak_69407	gene	116171887	116199045	-	start	47	OverlapStart	0.538	0.024	ENSMUSG00000020777.16	ENSMUSG00000020777.16	Acox1	KNOWN	protein_coding
chr11	116206111	116206160	chr11	116199239	116199253	Rxra_MA0512.2	3.67714	+	chr11	116198389	116199608	peak_69407	gene	116171887	116199045	-	start	47	OverlapStart	0.538	0.024	ENSMUSG00000020777.16	ENSMUSG00000020777.16	Acox1	KNOWN	protein_coding
chr11	116206111	116206160	chr11	116199329	116199343	Rxra_MA0512.2	6.90907	+	chr11	116198389	116199608	peak_69407	gene	116171887	116199045	-	start	47	OverlapStart	0.538	0.024	ENSMUSG00000020777.16	ENSMUSG00000020777.16	Acox1	KNOWN	protein_coding
chr2	158617931	158618067	chr2	158624676	158624690	Rxra_MA0512.2	2.97654	+	chr2	158624567	158625581	peak_218281	gene	158624887	158639211	+	start	187	OverlapStart	0.684	0.048	ENSMUSG00000037761.16	ENSMUSG00000037761.16	Actr5	KNOWN	protein_coding
chr9	119406154	119406203	chr9	119401779	119401793	Rxra_MA0512.2	4.13367	+	chr9	119401358	119404348	peak_375101	gene	119402443	119433501	+	start	410	OverlapStart	0.637	0.061	ENSMUSG00000061393.13	ENSMUSG00000061393.13	Acvr2b	KNOWN	protein_coding
chr15	101146183	101146232	chr15	101145503	101145517	Rxra_MA0512.2	6.9695	+	chr15	101144696	101147236	peak_140014	gene	101128521	101145336	+	end	630	OverlapEnd	0.252	0.038	ENSMUSG00000000530.16	ENSMUSG00000000530.16	Acvrl1	KNOWN	protein_coding
chr15	101146183	101146232	chr15	101146660	101146674	Rxra_MA0512.2	3.16133	-	chr15	101144696	101147236	peak_140014	gene	101128521	101145336	+	end	630	OverlapEnd	0.252	0.038	ENSMUSG00000000530.16	ENSMUSG00000000530.16	Acvrl1	KNOWN	protein_coding
chr16	85794715	85794764	chr16	85803358	85803372	Rxra_MA0512.2	3.33182	-	chr16	85800711	85804640	peak_152822	gene	85793826	85803113	-	start	438	OverlapStart	0.611	0.259	ENSMUSG00000022893.14	ENSMUSG00000022893.14	Adamts1	KNOWN	protein_coding
chr10	61194837	61194886	chr10	61199788	61199802	Rxra_MA0512.2	3.94153	+	chr10	61199627	61200327	peak_37102	gene	61197111	61273438	-	end	2866	PeakInsideFeature	1	0.009	ENSMUSG00000059901.12	ENSMUSG00000059901.12	Adamts14	KNOWN	protein_coding
chr12	88364588	88364638	chr12	88360687	88360701	Rxra_MA0512.2	3.7835	-	chr12	88360247	88361399	peak_83552	gene	88360553	88461719	+	start	270	OverlapStart	0.734	0.008	ENSMUSG00000021044.14	ENSMUSG00000021044.14	Adck1	KNOWN	protein_coding
chr3	151440674	151440723	chr3	151438079	151438093	Rxra_MA0512.2	6.69169	+	chr3	151437193	151439451	peak_242861	gene	151437886	151545086	+	start	436	OverlapStart	0.693	0.015	ENSMUSG00000039167.11	ENSMUSG00000039167.11	Adgrl4	KNOWN	protein_coding
chr3	151441347	151441396	chr3	151438079	151438093	Rxra_MA0512.2	6.69169	+	chr3	151437193	151439451	peak_242861	gene	151437886	151545086	+	start	436	OverlapStart	0.693	0.015	ENSMUSG00000039167.11	ENSMUSG00000039167.11	Adgrl4	KNOWN	protein_coding
chr1	177797205	177797278	chr1	177796260	177796274	Rxra_MA0512.2	2.77812	-	chr1	177795958	177796950	peak_25108	gene	177762961	177796511	-	start	57	OverlapStart	0.557	0.016	ENSMUSG00000015961.8	ENSMUSG00000015961.8	Adss	KNOWN	protein_coding
chr19	56956628	56956677	chr19	56955638	56955652	Rxra_MA0512.2	6.21446	+	chr19	56955003	56956709	peak_191832	gene	56912360	57008228	-	center	4438	PeakInsideFeature	1	0.018	ENSMUSG00000025083.17	ENSMUSG00000025083.17	Afap1l2	KNOWN	protein_coding
chr5	103853727	103853776	chr5	103856518	103856532	Rxra_MA0512.2	5.18961	-	chr5	103855521	103857829	peak_282142	gene	103692373	103855322	+	end	1353	Downstream	0	0	ENSMUSG00000029313.18	ENSMUSG00000029313.18	Aff1	KNOWN	protein_coding
chr5	90490883	90490932	chr5	90500838	90500852	Rxra_MA0512.2	2.73451	+	chr5	90500535	90501209	peak_280021	gene	90490736	90508907	+	center	1051	PeakInsideFeature	1	0.037	ENSMUSG00000054932.6	ENSMUSG00000054932.6	Afp	KNOWN	protein_coding
chr5	90491651	90491737	chr5	90500838	90500852	Rxra_MA0512.2	2.73451	+	chr5	90500535	90501209	peak_280021	gene	90490736	90508907	+	center	1051	PeakInsideFeature	1	0.037	ENSMUSG00000054932.6	ENSMUSG00000054932.6	Afp	KNOWN	protein_coding
chr5	90491651	90491737	chr5	90501003	90501017	Rxra_MA0512.2	3.12978	+	chr5	90500535	90501209	peak_280021	gene	90490736	90508907	+	center	1051	PeakInsideFeature	1	0.037	ENSMUSG00000054932.6	ENSMUSG00000054932.6	Afp	KNOWN	protein_coding
chr5	137664669	137664718	chr5	137672162	137672176	Rxra_MA0512.2	3.53755	+	chr5	137671324	137672654	peak_289309	gene	137650462	137684726	-	center	4395	PeakInsideFeature	1	0.039	ENSMUSG00000029722.15	ENSMUSG00000029722.15	Agfg2	KNOWN	protein_coding
chr2	75831624	75831673	chr2	75832238	75832252	Rxra_MA0512.2	11.8313	-	chr2	75831732	75832765	peak_205199	gene	75832176	75931350	+	start	72	OverlapStart	0.57	0.005	ENSMUSG00000042410.15	ENSMUSG00000042410.15	Agps	KNOWN	protein_coding
chr2	155076957	155077035	chr2	155074613	155074627	Rxra_MA0512.2	5.18683	-	chr2	155073764	155075154	peak_217347	gene	155059309	155074497	-	start	38	OverlapStart	0.527	0.048	ENSMUSG00000027597.15	ENSMUSG00000027597.15	Ahcy	KNOWN	protein_coding
chr4	41503140	41503189	chr4	41495919	41495933	Rxra_MA0512.2	5.90163	-	chr4	41495248	41496431	peak_248485	gene	41495603	41503076	-	end	236	OverlapEnd	0.7	0.111	ENSMUSG00000046312.4	ENSMUSG00000046312.4	AI464131	KNOWN	protein_coding
chr5	143901196	143901261	chr5	143902415	143902429	Rxra_MA0512.2	4.61483	+	chr5	143901951	143902957	peak_290638	gene	143902703	143909847	-	end	249	OverlapEnd	0.252	0.036	ENSMUSG00000029610.13	ENSMUSG00000029610.13	Aimp2	KNOWN	protein_coding
chr5	143901196	143901261	chr5	143909877	143909891	Rxra_MA0512.2	5.09431	-	chr5	143909293	143910371	peak_290639	gene	143902703	143909847	-	start	15	OverlapStart	0.514	0.078	ENSMUSG00000029610.13	ENSMUSG00000029610.13	Aimp2	KNOWN	protein_coding
chr5	143906507	143906556	chr5	143902415	143902429	Rxra_MA0512.2	4.61483	+	chr5	143901951	143902957	peak_290638	gene	143902703	143909847	-	end	249	OverlapEnd	0.252	0.036	ENSMUSG00000029610.13	ENSMUSG00000029610.13	Aimp2	KNOWN	protein_coding
chr5	143906507	143906556	chr5	143909877	143909891	Rxra_MA0512.2	5.09431	-	chr5	143909293	143910371	peak_290639	gene	143902703	143909847	-	start	15	OverlapStart	0.514	0.078	ENSMUSG00000029610.13	ENSMUSG00000029610.13	Aimp2	KNOWN	protein_coding
chr14	54566205	54566254	chr14	54569159	54569173	Rxra_MA0512.2	4.7645	+	chr14	54568489	54570371	peak_115275	gene	54567468	54577661	-	end	1962	PeakInsideFeature	1	0.185	ENSMUSG00000022178.10	ENSMUSG00000022178.10	Ajuba	KNOWN	protein_coding
chr14	54566205	54566254	chr14	54573022	54573036	Rxra_MA0512.2	4.71302	-	chr14	54572808	54573223	peak_115276	gene	54567468	54577661	-	center	451	PeakInsideFeature	1	0.041	ENSMUSG00000022178.10	ENSMUSG00000022178.10	Ajuba	KNOWN	protein_coding
chr14	54566792	54566841	chr14	54569159	54569173	Rxra_MA0512.2	4.7645	+	chr14	54568489	54570371	peak_115275	gene	54567468	54577661	-	end	1962	PeakInsideFeature	1	0.185	ENSMUSG00000022178.10	ENSMUSG00000022178.10	Ajuba	KNOWN	protein_coding
chr14	54566792	54566841	chr14	54573022	54573036	Rxra_MA0512.2	4.71302	-	chr14	54572808	54573223	peak_115276	gene	54567468	54577661	-	center	451	PeakInsideFeature	1	0.041	ENSMUSG00000022178.10	ENSMUSG00000022178.10	Ajuba	KNOWN	protein_coding
chr10	25305934	25306076	chr10	25311968	25311982	Rxra_MA0512.2	2.72247	+	chr10	25311050	25312387	peak_32403	gene	25169089	25307870	-	start	3848	Upstream	0	0	ENSMUSG00000039166.15	ENSMUSG00000039166.15	Akap7	KNOWN	protein_coding
chr4	34557593	34557642	chr4	34551532	34551546	Rxra_MA0512.2	3.5282	+	chr4	34550061	34551847	peak_247758	gene	34550936	34566908	+	start	18	OverlapStart	0.51	0.057	ENSMUSG00000028291.7	ENSMUSG00000028291.7	Akirin2	KNOWN	protein_coding
chr9	106228728	106228807	chr9	106230374	106230388	Rxra_MA0512.2	9.95889	-	chr9	106230004	106231534	peak_372392	gene	106233454	106248126	-	end	2685	Downstream	0	0	ENSMUSG00000032786.14	ENSMUSG00000032786.14	Alas1	KNOWN	protein_coding
chr9	106228728	106228807	chr9	106230913	106230927	Rxra_MA0512.2	3.46668	-	chr9	106230004	106231534	peak_372392	gene	106233454	106248126	-	end	2685	Downstream	0	0	ENSMUSG00000032786.14	ENSMUSG00000032786.14	Alas1	KNOWN	protein_coding
chr9	106228728	106228807	chr9	106236180	106236194	Rxra_MA0512.2	3.71726	+	chr9	106235103	106237875	peak_372394	gene	106233454	106248126	-	end	3035	PeakInsideFeature	1	0.189	ENSMUSG00000032786.14	ENSMUSG00000032786.14	Alas1	KNOWN	protein_coding
chr19	3911786	3911835	chr19	3914593	3914607	Rxra_MA0512.2	6.12037	+	chr19	3914586	3914803	peak_183252	gene	3913492	3929761	-	end	1202	PeakInsideFeature	1	0.013	ENSMUSG00000024885.8	ENSMUSG00000024885.8	Aldh3b1	KNOWN	protein_coding
chr19	3916111	3916160	chr19	3914593	3914607	Rxra_MA0512.2	6.12037	+	chr19	3914586	3914803	peak_183252	gene	3913492	3929761	-	end	1202	PeakInsideFeature	1	0.013	ENSMUSG00000024885.8	ENSMUSG00000024885.8	Aldh3b1	KNOWN	protein_coding
chr1	167351742	167351791	chr1	167349845	167349859	Rxra_MA0512.2	3.87758	+	chr1	167349327	167350874	peak_23189	gene	167349990	167368532	+	start	110	OverlapStart	0.571	0.048	ENSMUSG00000026687.14	ENSMUSG00000026687.14	Aldh9a1	KNOWN	protein_coding
chr1	167358244	167358346	chr1	167349845	167349859	Rxra_MA0512.2	3.87758	+	chr1	167349327	167350874	peak_23189	gene	167349990	167368532	+	start	110	OverlapStart	0.571	0.048	ENSMUSG00000026687.14	ENSMUSG00000026687.14	Aldh9a1	KNOWN	protein_coding
chr15	88819317	88819409	chr15	88819582	88819596	Rxra_MA0512.2	6.20653	+	chr15	88819044	88819770	peak_137524	gene	88805243	88819318	-	start	89	OverlapStart	0.377	0.019	ENSMUSG00000035845.17	ENSMUSG00000035845.17	Alg12	KNOWN	protein_coding
chr15	88829508	88829566	chr15	88819582	88819596	Rxra_MA0512.2	6.20653	+	chr15	88819044	88819770	peak_137524	gene	88805243	88819318	-	start	89	OverlapStart	0.377	0.019	ENSMUSG00000035845.17	ENSMUSG00000035845.17	Alg12	KNOWN	protein_coding
chrX	145509975	145510024	chrX	145506145	145506159	Rxra_MA0512.2	3.98496	-	chrX	145504762	145506362	peak_383261	gene	145446424	145505181	-	start	381	OverlapStart	0.262	0.007	ENSMUSG00000041688.16	ENSMUSG00000041688.16	Amot	KNOWN	protein_coding
chr1	190922683	190922732	chr1	190929408	190929422	Rxra_MA0512.2	6.6842	-	chr1	190927875	190929591	peak_27631	gene	190925111	190946962	+	start	3622	PeakInsideFeature	1	0.079	ENSMUSG00000026634.16	ENSMUSG00000026634.16	Angel2	KNOWN	protein_coding
chr1	190925559	190925608	chr1	190929408	190929422	Rxra_MA0512.2	6.6842	-	chr1	190927875	190929591	peak_27631	gene	190925111	190946962	+	start	3622	PeakInsideFeature	1	0.079	ENSMUSG00000026634.16	ENSMUSG00000026634.16	Angel2	KNOWN	protein_coding
chr8	18694345	18694394	chr8	18689848	18689862	Rxra_MA0512.2	13.895	-	chr8	18689265	18690622	peak_338193	gene	18690262	18741562	-	end	319	OverlapEnd	0.265	0.007	ENSMUSG00000031465.6	ENSMUSG00000031465.6	Angpt2	KNOWN	protein_coding
chr8	18695031	18695080	chr8	18689848	18689862	Rxra_MA0512.2	13.895	-	chr8	18689265	18690622	peak_338193	gene	18690262	18741562	-	end	319	OverlapEnd	0.265	0.007	ENSMUSG00000031465.6	ENSMUSG00000031465.6	Angpt2	KNOWN	protein_coding
chr12	36154689	36154738	chr12	36157618	36157632	Rxra_MA0512.2	3.43656	-	chr12	36156238	36158164	peak_75796	gene	36157123	36197291	+	start	78	OverlapStart	0.54	0.026	ENSMUSG00000036188.3	ENSMUSG00000036188.3	Ankmy2	KNOWN	protein_coding
chr13	98263203	98263252	chr13	98262808	98262822	Rxra_MA0512.2	3.13119	+	chr13	98262622	98264323	peak_103254	gene	98263157	98274750	+	start	315	OverlapStart	0.685	0.101	ENSMUSG00000021661.15	ENSMUSG00000021661.15	Ankra2	KNOWN	protein_coding
chr13	98263203	98263252	chr13	98263500	98263514	Rxra_MA0512.2	3.67087	-	chr13	98262622	98264323	peak_103254	gene	98263157	98274750	+	start	315	OverlapStart	0.685	0.101	ENSMUSG00000021661.15	ENSMUSG00000021661.15	Ankra2	KNOWN	protein_coding
chr13	98268996	98269045	chr13	98262808	98262822	Rxra_MA0512.2	3.13119	+	chr13	98262622	98264323	peak_103254	gene	98263157	98274750	+	start	315	OverlapStart	0.685	0.101	ENSMUSG00000021661.15	ENSMUSG00000021661.15	Ankra2	KNOWN	protein_coding
chr13	98268996	98269045	chr13	98263500	98263514	Rxra_MA0512.2	3.67087	-	chr13	98262622	98264323	peak_103254	gene	98263157	98274750	+	start	315	OverlapStart	0.685	0.101	ENSMUSG00000021661.15	ENSMUSG00000021661.15	Ankra2	KNOWN	protein_coding
chr15	101113509	101113558	chr15	101123436	101123450	Rxra_MA0512.2	3.05108	-	chr15	101122160	101124024	peak_140007	gene	101115754	101120022	+	end	3070	Downstream	0	0	ENSMUSG00000047034.9	ENSMUSG00000047034.9	Ankrd33	KNOWN	protein_coding
chr1	54927188	54927237	chr1	54926658	54926672	Rxra_MA0512.2	2.93277	-	chr1	54925444	54926776	peak_6348	gene	54645339	54926387	-	start	277	OverlapStart	0.708	0.003	ENSMUSG00000052331.14	ENSMUSG00000052331.14	Ankrd44	KNOWN	protein_coding
chr15	36494494	36494624	chr15	36496318	36496332	Rxra_MA0512.2	5.3481	+	chr15	36496257	36497102	peak_128713	gene	36477667	36496791	-	start	112	OverlapStart	0.632	0.028	ENSMUSG00000048307.7	ENSMUSG00000048307.7	Ankrd46	KNOWN	protein_coding
chr15	36494494	36494624	chr15	36500063	36500077	Rxra_MA0512.2	5.25642	+	chr15	36498790	36500990	peak_128714	gene	36477667	36496791	-	start	3099	Upstream	0	0	ENSMUSG00000048307.7	ENSMUSG00000048307.7	Ankrd46	KNOWN	protein_coding
chr9	62376247	62376296	chr9	62375024	62375038	Rxra_MA0512.2	7.93086	+	chr9	62372903	62375126	peak_364951	gene	62341292	62378812	+	end	4798	PeakInsideFeature	1	0.059	ENSMUSG00000032249.14	ENSMUSG00000032249.14	Anp32a	KNOWN	protein_coding
chr11	4989793	4989842	chr11	4984552	4984566	Rxra_MA0512.2	5.83278	+	chr11	4984231	4984673	peak_48946	gene	4986823	5042791	+	start	2371	Upstream	0	0	ENSMUSG00000009090.17	ENSMUSG00000009090.17	Ap1b1	KNOWN	protein_coding
chr11	4989793	4989842	chr11	4987126	4987140	Rxra_MA0512.2	13.5566	+	chr11	4986534	4987594	peak_48947	gene	4986823	5042791	+	start	241	OverlapStart	0.727	0.014	ENSMUSG00000009090.17	ENSMUSG00000009090.17	Ap1b1	KNOWN	protein_coding
chr11	4989793	4989842	chr11	4987177	4987191	Rxra_MA0512.2	3.13805	+	chr11	4986534	4987594	peak_48947	gene	4986823	5042791	+	start	241	OverlapStart	0.727	0.014	ENSMUSG00000009090.17	ENSMUSG00000009090.17	Ap1b1	KNOWN	protein_coding
chr11	4989793	4989842	chr11	4988740	4988754	Rxra_MA0512.2	3.4598	+	chr11	4988210	4989600	peak_48948	gene	4986823	5042791	+	start	2082	PeakInsideFeature	1	0.025	ENSMUSG00000009090.17	ENSMUSG00000009090.17	Ap1b1	KNOWN	protein_coding
chr7	44911910	44911959	chr7	44916397	44916411	Rxra_MA0512.2	3.74154	-	chr7	44916130	44919124	peak_318663	gene	44900372	44929496	-	center	2693	PeakInsideFeature	1	0.103	ENSMUSG00000060279.14	ENSMUSG00000060279.14	Ap2a1	KNOWN	protein_coding
chr14	21041910	21042019	chr14	21051923	21051937	Rxra_MA0512.2	3.61621	+	chr14	21051772	21053201	peak_109695	gene	21031441	21052508	-	start	22	OverlapStart	0.515	0.035	ENSMUSG00000021824.12	ENSMUSG00000021824.12	Ap3m1	KNOWN	protein_coding
chr14	21043467	21043516	chr14	21051923	21051937	Rxra_MA0512.2	3.61621	+	chr14	21051772	21053201	peak_109695	gene	21031441	21052508	-	start	22	OverlapStart	0.515	0.035	ENSMUSG00000021824.12	ENSMUSG00000021824.12	Ap3m1	KNOWN	protein_coding
chr5	138163384	138163433	chr5	138172249	138172263	Rxra_MA0512.2	7.23106	-	chr5	138170826	138172524	peak_289394	gene	138172001	138180429	+	start	326	OverlapStart	0.308	0.062	ENSMUSG00000019518.10	ENSMUSG00000019518.10	Ap4m1	KNOWN	protein_coding
chr10	80294241	80294290	chr10	80302526	80302540	Rxra_MA0512.2	3.99793	-	chr10	80302208	80303049	peak_40351	gene	80295976	80318263	+	center	4491	PeakInsideFeature	1	0.038	ENSMUSG00000020135.13	ENSMUSG00000020135.13	Apc2	KNOWN	protein_coding
chr7	30435253	30435302	chr7	30444765	30444779	Rxra_MA0512.2	2.63418	+	chr7	30443844	30446023	peak_317158	gene	30434981	30445535	-	start	602	OverlapStart	0.776	0.16	ENSMUSG00000006651.8	ENSMUSG00000006651.8	Aplp1	KNOWN	protein_coding
chr7	30440538	30440587	chr7	30444765	30444779	Rxra_MA0512.2	2.63418	+	chr7	30443844	30446023	peak_317158	gene	30434981	30445535	-	start	602	OverlapStart	0.776	0.16	ENSMUSG00000006651.8	ENSMUSG00000006651.8	Aplp1	KNOWN	protein_coding
chr7	30442815	30442864	chr7	30444765	30444779	Rxra_MA0512.2	2.63418	+	chr7	30443844	30446023	peak_317158	gene	30434981	30445535	-	start	602	OverlapStart	0.776	0.16	ENSMUSG00000006651.8	ENSMUSG00000006651.8	Aplp1	KNOWN	protein_coding
chr7	30448102	30448151	chr7	30444765	30444779	Rxra_MA0512.2	2.63418	+	chr7	30443844	30446023	peak_317158	gene	30434981	30445535	-	start	602	OverlapStart	0.776	0.16	ENSMUSG00000006651.8	ENSMUSG00000006651.8	Aplp1	KNOWN	protein_coding
chr1	152754779	152754828	chr1	152746542	152746556	Rxra_MA0512.2	3.65079	-	chr1	152746020	152746911	peak_20127	gene	152750550	152757544	+	start	4085	Upstream	0	0	ENSMUSG00000055547.4	ENSMUSG00000055547.4	Apobec4	KNOWN	protein_coding
chr7	19708786	19708880	chr7	19699673	19699687	Rxra_MA0512.2	3.81935	-	chr7	19698178	19699836	peak_316031	gene	19696108	19699188	-	start	181	OverlapStart	0.609	0.328	ENSMUSG00000002985.16	ENSMUSG00000002985.16	Apoe	KNOWN	protein_coding
chr7	97731629	97731678	chr7	97740107	97740121	Rxra_MA0512.2	3.40385	-	chr7	97740041	97740495	peak_326286	gene	97724005	97738289	-	start	1979	Upstream	0	0	ENSMUSG00000042797.9	ENSMUSG00000042797.9	Aqp11	KNOWN	protein_coding
chr9	44765727	44765776	chr9	44767849	44767863	Rxra_MA0512.2	8.41906	+	chr9	44766991	44767975	peak_361025	gene	44741563	44767845	-	start	362	OverlapStart	0.868	0.032	ENSMUSG00000032096.15	ENSMUSG00000032096.15	Arcn1	KNOWN	protein_coding
chr18	6137189	6137238	chr18	6136684	6136698	Rxra_MA0512.2	3.38127	-	chr18	6135279	6136834	peak_170298	gene	6024426	6136098	-	start	42	OverlapStart	0.527	0.007	ENSMUSG00000041225.16	ENSMUSG00000041225.16	Arhgap12	KNOWN	protein_coding
chr11	97412499	97412548	chr11	97412240	97412254	Rxra_MA0512.2	3.36555	-	chr11	97412020	97412730	peak_65305	gene	97415532	97502402	+	start	3157	Upstream	0	0	ENSMUSG00000049807.16	ENSMUSG00000049807.16	Arhgap23	KNOWN	protein_coding
chr11	97412499	97412548	chr11	97412396	97412410	Rxra_MA0512.2	5.11935	-	chr11	97412020	97412730	peak_65305	gene	97415532	97502402	+	start	3157	Upstream	0	0	ENSMUSG00000049807.16	ENSMUSG00000049807.16	Arhgap23	KNOWN	protein_coding
chr11	97412499	97412548	chr11	97418814	97418828	Rxra_MA0512.2	8.51799	+	chr11	97418374	97419914	peak_65307	gene	97415532	97502402	+	start	3612	PeakInsideFeature	1	0.018	ENSMUSG00000049807.16	ENSMUSG00000049807.16	Arhgap23	KNOWN	protein_coding
chr8	14903927	14903976	chr8	14913229	14913243	Rxra_MA0512.2	5.74299	-	chr8	14912637	14913404	peak_337525	gene	14911662	15001085	+	start	1358	PeakInsideFeature	1	0.008	ENSMUSG00000071176.10	ENSMUSG00000071176.10	Arhgef10	KNOWN	protein_coding
chr8	14954755	14954804	chr8	14952223	14952237	Rxra_MA0512.2	5.5064	-	chr8	14951767	14952922	peak_337539	gene	14911662	15001085	+	center	4029	PeakInsideFeature	1	0.013	ENSMUSG00000071176.10	ENSMUSG00000071176.10	Arhgef10	KNOWN	protein_coding
chr8	14957838	14957887	chr8	14952223	14952237	Rxra_MA0512.2	5.5064	-	chr8	14951767	14952922	peak_337539	gene	14911662	15001085	+	center	4029	PeakInsideFeature	1	0.013	ENSMUSG00000071176.10	ENSMUSG00000071176.10	Arhgef10	KNOWN	protein_coding
chr9	43107333	43107382	chr9	43107263	43107277	Rxra_MA0512.2	4.06606	+	chr9	43105112	43107903	peak_360608	gene	42963841	43105718	-	start	789	OverlapStart	0.217	0.004	ENSMUSG00000059495.13	ENSMUSG00000059495.13	Arhgef12	KNOWN	protein_coding
chr7	100932304	100932353	chr7	100932748	100932762	Rxra_MA0512.2	3.34485	-	chr7	100930964	100933171	peak_327122	gene	100869751	100932107	-	start	40	OverlapStart	0.518	0.018	ENSMUSG00000032875.8	ENSMUSG00000032875.8	Arhgef17	KNOWN	protein_coding
chr7	100939116	100939239	chr7	100932748	100932762	Rxra_MA0512.2	3.34485	-	chr7	100930964	100933171	peak_327122	gene	100869751	100932107	-	start	40	OverlapStart	0.518	0.018	ENSMUSG00000032875.8	ENSMUSG00000032875.8	Arhgef17	KNOWN	protein_coding
chr1	36318237	36318339	chr1	36309924	36309938	Rxra_MA0512.2	6.95352	-	chr1	36309143	36310063	peak_3570	gene	36307732	36324029	+	start	1871	PeakInsideFeature	1	0.056	ENSMUSG00000037447.16	ENSMUSG00000037447.16	Arid5a	KNOWN	protein_coding
chr10	68278285	68278334	chr10	68283319	68283333	Rxra_MA0512.2	6.78667	+	chr10	68282397	68283532	peak_38257	gene	68095592	68278726	-	start	4238	Upstream	0	0	ENSMUSG00000019947.9	ENSMUSG00000019947.9	Arid5b	KNOWN	protein_coding
chr11	120473320	120473369	chr11	120467246	120467260	Rxra_MA0512.2	4.58435	+	chr11	120466879	120467929	peak_70607	gene	120464865	120467607	-	start	203	OverlapStart	0.693	0.265	ENSMUSG00000057594.12	ENSMUSG00000057594.12	Arl16	KNOWN	protein_coding
chr19	46534777	46534826	chr19	46528990	46529004	Rxra_MA0512.2	3.58772	-	chr19	46528470	46532423	peak_190222	gene	46531108	46573085	-	end	662	OverlapEnd	0.333	0.031	ENSMUSG00000025035.8	ENSMUSG00000025035.8	Arl3	KNOWN	protein_coding
chr11	97990641	97990690	chr11	97994736	97994750	Rxra_MA0512.2	4.4568	+	chr11	97994379	97996436	peak_65471	gene	97989577	97996181	-	start	774	OverlapStart	0.876	0.273	ENSMUSG00000038352.15	ENSMUSG00000038352.15	Arl5c	KNOWN	protein_coding
chr11	97996116	97996165	chr11	97994736	97994750	Rxra_MA0512.2	4.4568	+	chr11	97994379	97996436	peak_65471	gene	97989577	97996181	-	start	774	OverlapStart	0.876	0.273	ENSMUSG00000038352.15	ENSMUSG00000038352.15	Arl5c	KNOWN	protein_coding
chr1	135137174	135137267	chr1	135146294	135146308	Rxra_MA0512.2	6.04079	+	chr1	135146125	135148306	peak_18022	gene	135146823	135156269	+	start	392	OverlapStart	0.68	0.157	ENSMUSG00000026426.10	ENSMUSG00000026426.10	Arl8a	KNOWN	protein_coding
chr9	99569469	99569518	chr9	99568885	99568899	Rxra_MA0512.2	6.47883	+	chr9	99568083	99569404	peak_371086	gene	99478371	99568899	-	start	156	OverlapStart	0.618	0.009	ENSMUSG00000032468.11	ENSMUSG00000032468.11	Armc8	KNOWN	protein_coding
chr9	99569469	99569518	chr9	99569200	99569214	Rxra_MA0512.2	3.21187	-	chr9	99568083	99569404	peak_371086	gene	99478371	99568899	-	start	156	OverlapStart	0.618	0.009	ENSMUSG00000032468.11	ENSMUSG00000032468.11	Armc8	KNOWN	protein_coding
chr1	86218519	86218568	chr1	86214407	86214421	Rxra_MA0512.2	5.88922	+	chr1	86214019	86216838	peak_11586	gene	86154779	86278284	+	center	1103	PeakInsideFeature	1	0.023	ENSMUSG00000062590.13	ENSMUSG00000062590.13	Armc9	KNOWN	protein_coding
chr1	74234914	74234995	chr1	74237163	74237177	Rxra_MA0512.2	2.63634	+	chr1	74235939	74238382	peak_9459	gene	74236083	74268209	+	start	1077	OverlapStart	0.941	0.072	ENSMUSG00000006304.14	ENSMUSG00000006304.14	Arpc2	KNOWN	protein_coding
chr1	74252633	74252682	chr1	74248847	74248861	Rxra_MA0512.2	6.19635	-	chr1	74248564	74250592	peak_9464	gene	74236083	74268209	+	center	2568	PeakInsideFeature	1	0.063	ENSMUSG00000006304.14	ENSMUSG00000006304.14	Arpc2	KNOWN	protein_coding
chr1	74252633	74252682	chr1	74250318	74250332	Rxra_MA0512.2	5.65738	-	chr1	74248564	74250592	peak_9464	gene	74236083	74268209	+	center	2568	PeakInsideFeature	1	0.063	ENSMUSG00000006304.14	ENSMUSG00000006304.14	Arpc2	KNOWN	protein_coding
chr1	74252753	74252802	chr1	74248847	74248861	Rxra_MA0512.2	6.19635	-	chr1	74248564	74250592	peak_9464	gene	74236083	74268209	+	center	2568	PeakInsideFeature	1	0.063	ENSMUSG00000006304.14	ENSMUSG00000006304.14	Arpc2	KNOWN	protein_coding
chr1	74252753	74252802	chr1	74250318	74250332	Rxra_MA0512.2	5.65738	-	chr1	74248564	74250592	peak_9464	gene	74236083	74268209	+	center	2568	PeakInsideFeature	1	0.063	ENSMUSG00000006304.14	ENSMUSG00000006304.14	Arpc2	KNOWN	protein_coding
chr1	74257084	74257170	chr1	74248847	74248861	Rxra_MA0512.2	6.19635	-	chr1	74248564	74250592	peak_9464	gene	74236083	74268209	+	center	2568	PeakInsideFeature	1	0.063	ENSMUSG00000006304.14	ENSMUSG00000006304.14	Arpc2	KNOWN	protein_coding
chr1	74257084	74257170	chr1	74250318	74250332	Rxra_MA0512.2	5.65738	-	chr1	74248564	74250592	peak_9464	gene	74236083	74268209	+	center	2568	PeakInsideFeature	1	0.063	ENSMUSG00000006304.14	ENSMUSG00000006304.14	Arpc2	KNOWN	protein_coding
chr7	99539144	99539193	chr7	99539811	99539825	Rxra_MA0512.2	5.36731	+	chr7	99539518	99539991	peak_326747	gene	99535465	99606771	+	start	4289	PeakInsideFeature	1	0.006	ENSMUSG00000018909.15	ENSMUSG00000018909.15	Arrb1	KNOWN	protein_coding
chr19	46697842	46697891	chr19	46707433	46707447	Rxra_MA0512.2	6.87113	+	chr19	46707026	46708532	peak_190267	gene	46707442	46741095	+	start	337	OverlapStart	0.724	0.032	ENSMUSG00000003559.7	ENSMUSG00000003559.7	As3mt	KNOWN	protein_coding
chr19	46697842	46697891	chr19	46707568	46707582	Rxra_MA0512.2	4.30762	-	chr19	46707026	46708532	peak_190267	gene	46707442	46741095	+	start	337	OverlapStart	0.724	0.032	ENSMUSG00000003559.7	ENSMUSG00000003559.7	As3mt	KNOWN	protein_coding
chr15	64378690	64378739	chr15	64383002	64383016	Rxra_MA0512.2	4.15592	-	chr15	64381686	64384147	peak_132560	gene	64086856	64382919	-	start	3	OverlapStart	0.501	0.004	ENSMUSG00000022377.16	ENSMUSG00000022377.16	Asap1	KNOWN	protein_coding
chr13	3630133	3630182	chr13	3634269	3634283	Rxra_MA0512.2	4.30643	-	chr13	3633644	3634674	peak_88807	gene	3634031	3651774	+	start	128	OverlapStart	0.624	0.036	ENSMUSG00000033781.6	ENSMUSG00000033781.6	Asb13	KNOWN	protein_coding
chr10	50593334	50593383	chr10	50592331	50592345	Rxra_MA0512.2	2.77602	+	chr10	50592134	50593234	peak_35589	gene	50592668	50851202	+	start	16	OverlapStart	0.515	0.002	ENSMUSG00000038774.8	ENSMUSG00000038774.8	Ascc3	KNOWN	protein_coding
chr10	53598876	53598925	chr10	53596922	53596936	Rxra_MA0512.2	4.84373	+	chr10	53596313	53597833	peak_35995	gene	53596960	53609213	+	start	113	OverlapStart	0.574	0.071	ENSMUSG00000019857.6	ENSMUSG00000019857.6	Asf1a	KNOWN	protein_coding
chr11	80081378	80081427	chr11	80085868	80085882	Rxra_MA0512.2	6.4657	+	chr11	80085798	80085974	peak_61872	gene	80089399	80135794	+	start	3513	Upstream	0	0	ENSMUSG00000017550.14	ENSMUSG00000017550.14	Atad5	KNOWN	protein_coding
chr15	101280905	101280954	chr15	101283713	101283727	Rxra_MA0512.2	3.04366	+	chr15	101283069	101284598	peak_140051	gene	101284300	101290934	+	start	467	OverlapStart	0.195	0.045	ENSMUSG00000037204.6	ENSMUSG00000037204.6	Atg101	KNOWN	protein_coding
chr15	101287034	101287083	chr15	101283713	101283727	Rxra_MA0512.2	3.04366	+	chr15	101283069	101284598	peak_140051	gene	101284300	101290934	+	start	467	OverlapStart	0.195	0.045	ENSMUSG00000037204.6	ENSMUSG00000037204.6	Atg101	KNOWN	protein_coding
chr15	101288464	101288513	chr15	101283713	101283727	Rxra_MA0512.2	3.04366	+	chr15	101283069	101284598	peak_140051	gene	101284300	101290934	+	start	467	OverlapStart	0.195	0.045	ENSMUSG00000037204.6	ENSMUSG00000037204.6	Atg101	KNOWN	protein_coding
chr4	99189203	99189252	chr4	99194439	99194453	Rxra_MA0512.2	5.99474	-	chr4	99193160	99194805	peak_256337	gene	99193933	99259787	+	start	49	OverlapStart	0.53	0.013	ENSMUSG00000028550.15	ENSMUSG00000028550.15	Atg4c	KNOWN	protein_coding
chr4	99197865	99197914	chr4	99194439	99194453	Rxra_MA0512.2	5.99474	-	chr4	99193160	99194805	peak_256337	gene	99193933	99259787	+	start	49	OverlapStart	0.53	0.013	ENSMUSG00000028550.15	ENSMUSG00000028550.15	Atg4c	KNOWN	protein_coding
chr6	124762697	124762746	chr6	124758040	124758054	Rxra_MA0512.2	4.41338	+	chr6	124755841	124758590	peak_310547	gene	124742543	124756524	-	start	691	OverlapStart	0.248	0.049	ENSMUSG00000004263.15	ENSMUSG00000004263.15	Atn1	KNOWN	protein_coding
chr11	55455892	55455941	chr11	55450602	55450616	Rxra_MA0512.2	2.8857	+	chr11	55449355	55450751	peak_56724	gene	55446640	55461239	-	end	3413	PeakInsideFeature	1	0.096	ENSMUSG00000018585.9	ENSMUSG00000018585.9	Atox1	KNOWN	protein_coding
chr8	12757390	12757439	chr8	12755499	12755513	Rxra_MA0512.2	4.00665	+	chr8	12755390	12758008	peak_336922	gene	12757013	12868728	+	start	314	OverlapStart	0.38	0.008	ENSMUSG00000031441.15	ENSMUSG00000031441.15	Atp11a	KNOWN	protein_coding
chr8	12757390	12757439	chr8	12757396	12757410	Rxra_MA0512.2	5.44062	+	chr8	12755390	12758008	peak_336922	gene	12757013	12868728	+	start	314	OverlapStart	0.38	0.008	ENSMUSG00000031441.15	ENSMUSG00000031441.15	Atp11a	KNOWN	protein_coding
chr8	12757390	12757439	chr8	12757501	12757515	Rxra_MA0512.2	3.43042	+	chr8	12755390	12758008	peak_336922	gene	12757013	12868728	+	start	314	OverlapStart	0.38	0.008	ENSMUSG00000031441.15	ENSMUSG00000031441.15	Atp11a	KNOWN	protein_coding
chr8	12760086	12760143	chr8	12755499	12755513	Rxra_MA0512.2	4.00665	+	chr8	12755390	12758008	peak_336922	gene	12757013	12868728	+	start	314	OverlapStart	0.38	0.008	ENSMUSG00000031441.15	ENSMUSG00000031441.15	Atp11a	KNOWN	protein_coding
chr8	12760086	12760143	chr8	12757396	12757410	Rxra_MA0512.2	5.44062	+	chr8	12755390	12758008	peak_336922	gene	12757013	12868728	+	start	314	OverlapStart	0.38	0.008	ENSMUSG00000031441.15	ENSMUSG00000031441.15	Atp11a	KNOWN	protein_coding
chr8	12760086	12760143	chr8	12757501	12757515	Rxra_MA0512.2	3.43042	+	chr8	12755390	12758008	peak_336922	gene	12757013	12868728	+	start	314	OverlapStart	0.38	0.008	ENSMUSG00000031441.15	ENSMUSG00000031441.15	Atp11a	KNOWN	protein_coding
chr16	30390106	30390155	chr16	30390278	30390292	Rxra_MA0512.2	10.0002	-	chr16	30387751	30390795	peak_145680	gene	30312422	30388837	-	start	436	OverlapStart	0.357	0.014	ENSMUSG00000022533.13	ENSMUSG00000022533.13	Atp13a3	KNOWN	protein_coding
chr1	172297376	172297425	chr1	172297764	172297778	Rxra_MA0512.2	4.69745	+	chr1	172297692	172298377	peak_24218	gene	172271708	172298064	-	start	30	OverlapStart	0.543	0.014	ENSMUSG00000007097.14	ENSMUSG00000007097.14	Atp1a2	KNOWN	protein_coding
chr1	172297376	172297425	chr1	172302516	172302530	Rxra_MA0512.2	3.10987	-	chr1	172302484	172303214	peak_24220	gene	172271708	172298064	-	start	4785	Upstream	0	0	ENSMUSG00000007097.14	ENSMUSG00000007097.14	Atp1a2	KNOWN	protein_coding
chr11	69601284	69601333	chr11	69603754	69603768	Rxra_MA0512.2	4.83376	-	chr11	69603564	69603870	peak_59499	gene	69599735	69605942	-	center	879	PeakInsideFeature	1	0.049	ENSMUSG00000041329.13	ENSMUSG00000041329.13	Atp1b2	KNOWN	protein_coding
chr10	98914009	98914058	chr10	98914879	98914893	Rxra_MA0512.2	3.96752	-	chr10	98913831	98915271	peak_43728	gene	98915151	99026143	+	start	600	OverlapStart	0.083	0.001	ENSMUSG00000019943.9	ENSMUSG00000019943.9	Atp2b1	KNOWN	protein_coding
chr8	119695915	119695964	chr8	119699248	119699262	Rxra_MA0512.2	6.28995	+	chr8	119698861	119700385	peak_352535	gene	119700008	119757718	+	start	385	OverlapStart	0.247	0.006	ENSMUSG00000034112.8	ENSMUSG00000034112.8	Atp2c2	KNOWN	protein_coding
chr10	128076691	128076740	chr10	128082975	128082989	Rxra_MA0512.2	5.30251	+	chr10	128082769	128083904	peak_48174	gene	128083272	128090391	+	start	64	OverlapStart	0.557	0.089	ENSMUSG00000025393.12	ENSMUSG00000025393.12	Atp5b	KNOWN	protein_coding
chr10	128092444	128092493	chr10	128082975	128082989	Rxra_MA0512.2	5.30251	+	chr10	128082769	128083904	peak_48174	gene	128083272	128090391	+	start	64	OverlapStart	0.557	0.089	ENSMUSG00000025393.12	ENSMUSG00000025393.12	Atp5b	KNOWN	protein_coding
chr10	80141987	80142036	chr10	80141205	80141219	Rxra_MA0512.2	5.08574	+	chr10	80141131	80142561	peak_40315	gene	80138631	80145818	+	center	378	PeakInsideFeature	1	0.199	ENSMUSG00000003072.15	ENSMUSG00000003072.15	Atp5d	KNOWN	protein_coding
chr16	84828710	84828799	chr16	84834652	84834666	Rxra_MA0512.2	7.82164	-	chr16	84834450	84836345	peak_152618	gene	84827865	84835625	-	start	228	OverlapStart	0.62	0.151	ENSMUSG00000022890.13	ENSMUSG00000022890.13	Atp5j	KNOWN	protein_coding
chr16	84828710	84828799	chr16	84834713	84834727	Rxra_MA0512.2	6.63646	+	chr16	84834450	84836345	peak_152618	gene	84827865	84835625	-	start	228	OverlapStart	0.62	0.151	ENSMUSG00000022890.13	ENSMUSG00000022890.13	Atp5j	KNOWN	protein_coding
chr16	84828710	84828799	chr16	84836291	84836305	Rxra_MA0512.2	3.43178	-	chr16	84834450	84836345	peak_152618	gene	84827865	84835625	-	start	228	OverlapStart	0.62	0.151	ENSMUSG00000022890.13	ENSMUSG00000022890.13	Atp5j	KNOWN	protein_coding
chr16	84845177	84845226	chr16	84836291	84836305	Rxra_MA0512.2	3.43178	-	chr16	84834450	84836345	peak_152618	gene	84827865	84835625	-	start	228	OverlapStart	0.62	0.151	ENSMUSG00000022890.13	ENSMUSG00000022890.13	Atp5j	KNOWN	protein_coding
chr4	19901560	19901609	chr4	19895268	19895282	Rxra_MA0512.2	3.46668	-	chr4	19893872	19896126	peak_246375	gene	19876840	19922605	-	center	4723	PeakInsideFeature	1	0.049	ENSMUSG00000028238.6	ENSMUSG00000028238.6	Atp6v0d2	KNOWN	protein_coding
chr4	134507140	134507189	chr4	134511270	134511284	Rxra_MA0512.2	2.6576	-	chr4	134510873	134511342	peak_263136	gene	134510998	134523927	+	start	109	OverlapStart	0.733	0.027	ENSMUSG00000078521.2	ENSMUSG00000078521.2	Aunip	KNOWN	protein_coding
chr4	134507581	134507682	chr4	134511270	134511284	Rxra_MA0512.2	2.6576	-	chr4	134510873	134511342	peak_263136	gene	134510998	134523927	+	start	109	OverlapStart	0.733	0.027	ENSMUSG00000078521.2	ENSMUSG00000078521.2	Aunip	KNOWN	protein_coding
chr19	42121207	42121256	chr19	42128738	42128752	Rxra_MA0512.2	5.02228	+	chr19	42128647	42129976	peak_189329	gene	42123272	42129059	-	start	252	OverlapStart	0.31	0.071	ENSMUSG00000018821.3	ENSMUSG00000018821.3	Avpi1	KNOWN	protein_coding
chr19	42124329	42124378	chr19	42128738	42128752	Rxra_MA0512.2	5.02228	+	chr19	42128647	42129976	peak_189329	gene	42123272	42129059	-	start	252	OverlapStart	0.31	0.071	ENSMUSG00000018821.3	ENSMUSG00000018821.3	Avpi1	KNOWN	protein_coding
chr19	42132160	42132209	chr19	42128738	42128752	Rxra_MA0512.2	5.02228	+	chr19	42128647	42129976	peak_189329	gene	42123272	42129059	-	start	252	OverlapStart	0.31	0.071	ENSMUSG00000018821.3	ENSMUSG00000018821.3	Avpi1	KNOWN	protein_coding
chr18	25168318	25168397	chr18	25169087	25169101	Rxra_MA0512.2	2.76786	-	chr18	25168057	25169452	peak_172880	gene	25168998	25467321	+	start	244	OverlapStart	0.325	0.001	ENSMUSG00000033632.15	ENSMUSG00000033632.15	AW554918	KNOWN	protein_coding
chr11	22852491	22852540	chr11	22850274	22850288	Rxra_MA0512.2	4.14232	+	chr11	22850060	22854049	peak_51223	gene	22834746	22860961	-	center	4201	PeakInsideFeature	1	0.152	ENSMUSG00000051650.10	ENSMUSG00000051650.10	B3gnt2	KNOWN	protein_coding
chr7	128522931	128522980	chr7	128523259	128523273	Rxra_MA0512.2	2.63087	+	chr7	128523167	128524549	peak_332021	gene	128523615	128546981	+	start	243	OverlapStart	0.676	0.04	ENSMUSG00000030847.8	ENSMUSG00000030847.8	Bag3	KNOWN	protein_coding
chr11	120257891	120257940	chr11	120264114	120264128	Rxra_MA0512.2	3.25629	-	chr11	120264050	120264303	peak_70559	gene	120232946	120292296	+	center	1555	PeakInsideFeature	1	0.004	ENSMUSG00000039741.15	ENSMUSG00000039741.15	Bahcc1	KNOWN	protein_coding
chr11	120262722	120262773	chr11	120264114	120264128	Rxra_MA0512.2	3.25629	-	chr11	120264050	120264303	peak_70559	gene	120232946	120292296	+	center	1555	PeakInsideFeature	1	0.004	ENSMUSG00000039741.15	ENSMUSG00000039741.15	Bahcc1	KNOWN	protein_coding
chr17	27027635	27027684	chr17	27028161	27028175	Rxra_MA0512.2	4.59249	-	chr17	27027331	27029045	peak_159083	gene	27019809	27029009	-	start	821	OverlapStart	0.979	0.182	ENSMUSG00000057789.13	ENSMUSG00000057789.13	Bak1	KNOWN	protein_coding
chr17	27031101	27031150	chr17	27028161	27028175	Rxra_MA0512.2	4.59249	-	chr17	27027331	27029045	peak_159083	gene	27019809	27029009	-	start	821	OverlapStart	0.979	0.182	ENSMUSG00000057789.13	ENSMUSG00000057789.13	Bak1	KNOWN	protein_coding
chr19	6138055	6138104	chr19	6140553	6140567	Rxra_MA0512.2	6.23051	+	chr19	6139957	6141840	peak_183772	gene	6140982	6172476	+	start	84	OverlapStart	0.456	0.027	ENSMUSG00000039699.13	ENSMUSG00000039699.13	Batf2	KNOWN	protein_coding
chr7	45472808	45472857	chr7	45467082	45467096	Rxra_MA0512.2	3.1726	+	chr7	45465677	45467459	peak_318788	gene	45461696	45466898	-	start	330	OverlapStart	0.685	0.235	ENSMUSG00000003873.11	ENSMUSG00000003873.11	Bax	KNOWN	protein_coding
chr10	128092444	128092493	chr10	128091287	128091301	Rxra_MA0512.2	4.33674	+	chr10	128090780	128093618	peak_48175	gene	128092782	128129303	+	start	583	OverlapStart	0.295	0.023	ENSMUSG00000040054.15	ENSMUSG00000040054.15	Baz2a	KNOWN	protein_coding
chr10	128092444	128092493	chr10	128091343	128091357	Rxra_MA0512.2	4.97764	+	chr10	128090780	128093618	peak_48175	gene	128092782	128129303	+	start	583	OverlapStart	0.295	0.023	ENSMUSG00000040054.15	ENSMUSG00000040054.15	Baz2a	KNOWN	protein_coding
chr10	128092444	128092493	chr10	128091855	128091869	Rxra_MA0512.2	3.93178	-	chr10	128090780	128093618	peak_48175	gene	128092782	128129303	+	start	583	OverlapStart	0.295	0.023	ENSMUSG00000040054.15	ENSMUSG00000040054.15	Baz2a	KNOWN	protein_coding
chr7	16311702	16311751	chr7	16312891	16312905	Rxra_MA0512.2	9.05573	+	chr7	16312456	16314433	peak_315571	gene	16308392	16318205	+	center	146	PeakInsideFeature	1	0.201	ENSMUSG00000002083.13	ENSMUSG00000002083.13	Bbc3	KNOWN	protein_coding
chr7	16313161	16313210	chr7	16312891	16312905	Rxra_MA0512.2	9.05573	+	chr7	16312456	16314433	peak_315571	gene	16308392	16318205	+	center	146	PeakInsideFeature	1	0.201	ENSMUSG00000002083.13	ENSMUSG00000002083.13	Bbc3	KNOWN	protein_coding
chr16	45637604	45637653	chr16	45630551	45630565	Rxra_MA0512.2	2.7196	+	chr16	45629754	45630965	peak_148862	gene	45626847	45654118	-	end	3512	PeakInsideFeature	1	0.044	ENSMUSG00000033187.7	ENSMUSG00000033187.7	BC016579	KNOWN	protein_coding
chr10	121742138	121742187	chr10	121739805	121739819	Rxra_MA0512.2	5.8681	-	chr10	121739319	121740578	peak_47177	gene	121739936	121752878	+	start	12	OverlapStart	0.51	0.05	ENSMUSG00000053684.8	ENSMUSG00000053684.8	BC048403	KNOWN	protein_coding
chr11	51260313	51260362	chr11	51262845	51262859	Rxra_MA0512.2	6.68183	+	chr11	51262616	51265631	peak_55706	gene	51253650	51263046	-	start	1077	OverlapStart	0.143	0.046	ENSMUSG00000045942.12	ENSMUSG00000045942.12	BC049762	KNOWN	protein_coding
chr2	115584467	115584516	chr2	115582091	115582105	Rxra_MA0512.2	4.09978	+	chr2	115581179	115582181	peak_210222	gene	115581715	115778768	+	start	35	OverlapStart	0.465	0.002	ENSMUSG00000040282.13	ENSMUSG00000040282.13	BC052040	KNOWN	protein_coding
chr2	170346776	170346825	chr2	170343864	170343878	Rxra_MA0512.2	3.53379	-	chr2	170343107	170346144	peak_220911	gene	170346990	170427845	-	end	2365	Downstream	0	0	ENSMUSG00000013523.13	ENSMUSG00000013523.13	Bcas1	KNOWN	protein_coding
chr5	123373088	123373137	chr5	123376779	123376793	Rxra_MA0512.2	2.7482	+	chr5	123376348	123377994	peak_286330	gene	123343833	123374992	+	end	2179	Downstream	0	0	ENSMUSG00000029438.9	ENSMUSG00000029438.9	Bcl7a	KNOWN	protein_coding
chr5	123373088	123373137	chr5	123377626	123377640	Rxra_MA0512.2	3.77509	+	chr5	123376348	123377994	peak_286330	gene	123343833	123374992	+	end	2179	Downstream	0	0	ENSMUSG00000029438.9	ENSMUSG00000029438.9	Bcl7a	KNOWN	protein_coding
chr3	97201665	97201714	chr3	97203945	97203959	Rxra_MA0512.2	3.58772	+	chr3	97203237	97204361	peak_234759	gene	97203661	97297917	-	end	138	OverlapEnd	0.623	0.007	ENSMUSG00000038256.15	ENSMUSG00000038256.15	Bcl9	KNOWN	protein_coding
chr3	97204055	97204104	chr3	97203945	97203959	Rxra_MA0512.2	3.58772	+	chr3	97203237	97204361	peak_234759	gene	97203661	97297917	-	end	138	OverlapEnd	0.623	0.007	ENSMUSG00000038256.15	ENSMUSG00000038256.15	Bcl9	KNOWN	protein_coding
chr9	44505385	44505434	chr9	44511135	44511149	Rxra_MA0512.2	3.26066	-	chr9	44509528	44512585	peak_360950	gene	44499135	44510388	+	end	668	OverlapEnd	0.281	0.076	ENSMUSG00000063382.5	ENSMUSG00000063382.5	Bcl9l	KNOWN	protein_coding
chr9	44505385	44505434	chr9	44511241	44511255	Rxra_MA0512.2	2.96322	+	chr9	44509528	44512585	peak_360950	gene	44499135	44510388	+	end	668	OverlapEnd	0.281	0.076	ENSMUSG00000063382.5	ENSMUSG00000063382.5	Bcl9l	KNOWN	protein_coding
chr9	44511476	44511558	chr9	44511135	44511149	Rxra_MA0512.2	3.26066	-	chr9	44509528	44512585	peak_360950	gene	44499135	44510388	+	end	668	OverlapEnd	0.281	0.076	ENSMUSG00000063382.5	ENSMUSG00000063382.5	Bcl9l	KNOWN	protein_coding
chr9	44511476	44511558	chr9	44511241	44511255	Rxra_MA0512.2	2.96322	+	chr9	44509528	44512585	peak_360950	gene	44499135	44510388	+	end	668	OverlapEnd	0.281	0.076	ENSMUSG00000063382.5	ENSMUSG00000063382.5	Bcl9l	KNOWN	protein_coding
chr10	20306291	20306340	chr10	20311655	20311669	Rxra_MA0512.2	8.38821	+	chr10	20311636	20313290	peak_31499	gene	20312468	20344613	+	start	5	OverlapStart	0.497	0.026	ENSMUSG00000037608.15	ENSMUSG00000037608.15	Bclaf1	KNOWN	protein_coding
chr9	50532630	50532679	chr9	50533866	50533880	Rxra_MA0512.2	2.98696	+	chr9	50533352	50534217	peak_362372	gene	50533086	50555181	-	end	698	PeakInsideFeature	1	0.039	ENSMUSG00000032066.9	ENSMUSG00000032066.9	Bco2	KNOWN	protein_coding
chr9	50553760	50553809	chr9	50555293	50555307	Rxra_MA0512.2	8.43167	-	chr9	50553548	50555595	peak_362376	gene	50533086	50555181	-	start	610	OverlapStart	0.798	0.074	ENSMUSG00000032066.9	ENSMUSG00000032066.9	Bco2	KNOWN	protein_coding
chr3	135289876	135289925	chr3	135290565	135290579	Rxra_MA0512.2	13.5566	+	chr3	135290049	135290833	peak_240389	gene	135281220	135304426	+	center	2382	PeakInsideFeature	1	0.034	ENSMUSG00000028167.15	ENSMUSG00000028167.15	Bdh2	KNOWN	protein_coding
chr3	135300231	135300337	chr3	135290565	135290579	Rxra_MA0512.2	13.5566	+	chr3	135290049	135290833	peak_240389	gene	135281220	135304426	+	center	2382	PeakInsideFeature	1	0.034	ENSMUSG00000028167.15	ENSMUSG00000028167.15	Bdh2	KNOWN	protein_coding
chr6	4076906	4076955	chr6	4086838	4086852	Rxra_MA0512.2	3.03277	+	chr6	4086502	4087339	peak_292325	gene	4076898	4086972	-	start	52	OverlapStart	0.562	0.047	ENSMUSG00000032757.6	ENSMUSG00000032757.6	Bet1	KNOWN	protein_coding
chr6	4088176	4088261	chr6	4086838	4086852	Rxra_MA0512.2	3.03277	+	chr6	4086502	4087339	peak_292325	gene	4076898	4086972	-	start	52	OverlapStart	0.562	0.047	ENSMUSG00000032757.6	ENSMUSG00000032757.6	Bet1	KNOWN	protein_coding
chr6	4088176	4088261	chr6	4087178	4087192	Rxra_MA0512.2	3.0859	-	chr6	4086502	4087339	peak_292325	gene	4076898	4086972	-	start	52	OverlapStart	0.562	0.047	ENSMUSG00000032757.6	ENSMUSG00000032757.6	Bet1	KNOWN	protein_coding
chr6	4088176	4088261	chr6	4087264	4087278	Rxra_MA0512.2	2.91633	+	chr6	4086502	4087339	peak_292325	gene	4076898	4086972	-	start	52	OverlapStart	0.562	0.047	ENSMUSG00000032757.6	ENSMUSG00000032757.6	Bet1	KNOWN	protein_coding
chr14	70097087	70097136	chr14	70096523	70096537	Rxra_MA0512.2	3.2388	-	chr14	70095950	70096753	peak_118341	gene	70100144	70138191	+	start	3793	Upstream	0	0	ENSMUSG00000022089.8	ENSMUSG00000022089.8	Bin3	KNOWN	protein_coding
chr14	70097087	70097136	chr14	70101597	70101611	Rxra_MA0512.2	7.51585	+	chr14	70099697	70102582	peak_118342	gene	70100144	70138191	+	start	995	OverlapStart	0.845	0.064	ENSMUSG00000022089.8	ENSMUSG00000022089.8	Bin3	KNOWN	protein_coding
chr14	70103222	70103295	chr14	70096523	70096537	Rxra_MA0512.2	3.2388	-	chr14	70095950	70096753	peak_118341	gene	70100144	70138191	+	start	3793	Upstream	0	0	ENSMUSG00000022089.8	ENSMUSG00000022089.8	Bin3	KNOWN	protein_coding
chr14	70103222	70103295	chr14	70101597	70101611	Rxra_MA0512.2	7.51585	+	chr14	70099697	70102582	peak_118342	gene	70100144	70138191	+	start	995	OverlapStart	0.845	0.064	ENSMUSG00000022089.8	ENSMUSG00000022089.8	Bin3	KNOWN	protein_coding
chr14	66986839	66986888	chr14	66984085	66984099	Rxra_MA0512.2	2.6341	-	chr14	66983431	66984941	peak_117811	gene	66985238	67008877	-	end	1052	Downstream	0	0	ENSMUSG00000022051.15	ENSMUSG00000022051.15	Bnip3l	KNOWN	protein_coding
chr1	93691018	93691109	chr1	93687063	93687077	Rxra_MA0512.2	6.31236	-	chr1	93685363	93688571	peak_13446	gene	93685659	93695764	+	start	1308	OverlapStart	0.908	0.288	ENSMUSG00000026278.14	ENSMUSG00000026278.14	Bok	KNOWN	protein_coding
chr7	126692510	126692559	chr7	126695614	126695628	Rxra_MA0512.2	2.86767	+	chr7	126694748	126696250	peak_331637	gene	126695400	126699798	+	start	99	OverlapStart	0.566	0.193	ENSMUSG00000047721.8	ENSMUSG00000047721.8	Bola2	KNOWN	protein_coding
chr7	126692510	126692559	chr7	126695647	126695661	Rxra_MA0512.2	2.82682	-	chr7	126694748	126696250	peak_331637	gene	126695400	126699798	+	start	99	OverlapStart	0.566	0.193	ENSMUSG00000047721.8	ENSMUSG00000047721.8	Bola2	KNOWN	protein_coding
chr13	34077988	34078037	chr13	34071464	34071478	Rxra_MA0512.2	3.73443	-	chr13	34071280	34071851	peak_92941	gene	34037640	34074074	+	end	2509	PeakInsideFeature	1	0.016	ENSMUSG00000038286.10	ENSMUSG00000038286.10	Bphl	KNOWN	protein_coding
chr2	27508837	27508886	chr2	27504707	27504721	Rxra_MA0512.2	3.11234	-	chr2	27503574	27505943	peak_197045	gene	27445578	27507662	-	start	2904	PeakInsideFeature	1	0.038	ENSMUSG00000026918.16	ENSMUSG00000026918.16	Brd3	KNOWN	protein_coding
chr5	31695467	31695594	chr5	31697626	31697640	Rxra_MA0512.2	7.39907	-	chr5	31697408	31698817	peak_272218	gene	31697683	32084962	+	start	429	OverlapStart	0.805	0.002	ENSMUSG00000052139.18	ENSMUSG00000052139.18	Bre	KNOWN	protein_coding
chr5	31696968	31697017	chr5	31697626	31697640	Rxra_MA0512.2	7.39907	-	chr5	31697408	31698817	peak_272218	gene	31697683	32084962	+	start	429	OverlapStart	0.805	0.002	ENSMUSG00000052139.18	ENSMUSG00000052139.18	Bre	KNOWN	protein_coding
chr8	71538590	71538639	chr8	71537808	71537822	Rxra_MA0512.2	4.13013	+	chr8	71537056	71537917	peak_344772	gene	71534263	71537437	-	start	49	OverlapStart	0.443	0.12	ENSMUSG00000046718.7	ENSMUSG00000046718.7	Bst2	KNOWN	protein_coding
chr8	71538590	71538639	chr8	71537853	71537867	Rxra_MA0512.2	4.45634	+	chr8	71537056	71537917	peak_344772	gene	71534263	71537437	-	start	49	OverlapStart	0.443	0.12	ENSMUSG00000046718.7	ENSMUSG00000046718.7	Bst2	KNOWN	protein_coding
chr14	31664230	31664279	chr14	31657099	31657113	Rxra_MA0512.2	2.79545	-	chr14	31656800	31657702	peak_112151	gene	31641027	31668579	+	center	2448	PeakInsideFeature	1	0.033	ENSMUSG00000021900.10	ENSMUSG00000021900.10	Btd	KNOWN	protein_coding
chr4	108838513	108838562	chr4	108834387	108834401	Rxra_MA0512.2	2.91257	+	chr4	108832977	108834999	peak_258494	gene	108814294	108833614	-	start	374	OverlapStart	0.315	0.033	ENSMUSG00000028568.16	ENSMUSG00000028568.16	Btf3l4	KNOWN	protein_coding
chr16	45248473	45248522	chr16	45250671	45250685	Rxra_MA0512.2	4.47873	-	chr16	45250066	45250987	peak_148803	gene	45224314	45252895	+	end	2369	PeakInsideFeature	1	0.032	ENSMUSG00000052013.14	ENSMUSG00000052013.14	Btla	KNOWN	protein_coding
chr8	71523259	71523312	chr8	71521651	71521665	Rxra_MA0512.2	5.56732	-	chr8	71521589	71522125	peak_344768	gene	71520119	71525711	-	center	1058	PeakInsideFeature	1	0.096	ENSMUSG00000108900.1	ENSMUSG00000108900.1	C430049E01Rik	KNOWN	protein_coding
chr7	24488354	24488403	chr7	24485485	24485499	Rxra_MA0512.2	7.83712	-	chr7	24485225	24487921	peak_316207	gene	24482022	24504539	+	start	4551	PeakInsideFeature	1	0.12	ENSMUSG00000054793.8	ENSMUSG00000054793.8	Cadm4	KNOWN	protein_coding
chr7	24488354	24488403	chr7	24485565	24485579	Rxra_MA0512.2	3.6554	-	chr7	24485225	24487921	peak_316207	gene	24482022	24504539	+	start	4551	PeakInsideFeature	1	0.12	ENSMUSG00000054793.8	ENSMUSG00000054793.8	Cadm4	KNOWN	protein_coding
chr7	24488354	24488403	chr7	24486924	24486938	Rxra_MA0512.2	3.09017	-	chr7	24485225	24487921	peak_316207	gene	24482022	24504539	+	start	4551	PeakInsideFeature	1	0.12	ENSMUSG00000054793.8	ENSMUSG00000054793.8	Cadm4	KNOWN	protein_coding
chr17	87444810	87444859	chr17	87446468	87446482	Rxra_MA0512.2	7.11462	-	chr17	87445852	87447586	peak_168903	gene	87433411	87446935	-	start	216	OverlapStart	0.625	0.08	ENSMUSG00000036438.12	ENSMUSG00000036438.12	Calm2	KNOWN	protein_coding
chr4	138456731	138456818	chr4	138453700	138453714	Rxra_MA0512.2	2.60835	+	chr4	138453473	138456364	peak_264208	gene	138454313	138460123	+	start	605	OverlapStart	0.709	0.353	ENSMUSG00000046447.3	ENSMUSG00000046447.3	Camk2n1	KNOWN	protein_coding
chr4	138456731	138456818	chr4	138454020	138454034	Rxra_MA0512.2	5.71552	-	chr4	138453473	138456364	peak_264208	gene	138454313	138460123	+	start	605	OverlapStart	0.709	0.353	ENSMUSG00000046447.3	ENSMUSG00000046447.3	Camk2n1	KNOWN	protein_coding
chr4	138456731	138456818	chr4	138455557	138455571	Rxra_MA0512.2	3.16258	+	chr4	138453473	138456364	peak_264208	gene	138454313	138460123	+	start	605	OverlapStart	0.709	0.353	ENSMUSG00000046447.3	ENSMUSG00000046447.3	Camk2n1	KNOWN	protein_coding
chr4	138456731	138456818	chr4	138463584	138463598	Rxra_MA0512.2	5.59481	-	chr4	138462747	138465273	peak_264211	gene	138454313	138460123	+	end	3887	Downstream	0	0	ENSMUSG00000046447.3	ENSMUSG00000046447.3	Camk2n1	KNOWN	protein_coding
chr11	50321780	50321829	chr11	50325238	50325252	Rxra_MA0512.2	2.88362	+	chr11	50325166	50326303	peak_55549	gene	50293960	50325673	-	start	61	OverlapStart	0.446	0.016	ENSMUSG00000020368.15	ENSMUSG00000020368.15	Canx	KNOWN	protein_coding
chr3	104868251	104868300	chr3	104864065	104864079	Rxra_MA0512.2	3.28526	+	chr3	104863687	104865577	peak_236218	gene	104822778	104864505	-	start	127	OverlapStart	0.433	0.02	ENSMUSG00000070372.11	ENSMUSG00000070372.11	Capza1	KNOWN	protein_coding
chr3	14895678	14895727	chr3	14891538	14891552	Rxra_MA0512.2	5.06043	-	chr3	14891417	14891952	peak_223611	gene	14886272	14900770	+	center	1837	PeakInsideFeature	1	0.037	ENSMUSG00000027562.12	ENSMUSG00000027562.12	Car2	KNOWN	protein_coding
chr19	18667145	18667194	chr19	18670704	18670718	Rxra_MA0512.2	3.27986	-	chr19	18670361	18671448	peak_185416	gene	18670779	18704788	+	start	125	OverlapStart	0.615	0.02	ENSMUSG00000024726.9	ENSMUSG00000024726.9	Carnmt1	KNOWN	protein_coding
chr8	46624294	46624343	chr8	46617455	46617469	Rxra_MA0512.2	2.73389	+	chr8	46616744	46618089	peak_341904	gene	46617290	46639689	+	start	126	OverlapStart	0.594	0.036	ENSMUSG00000031628.9	ENSMUSG00000031628.9	Casp3	KNOWN	protein_coding
chr18	66048277	66048326	chr18	66040203	66040217	Rxra_MA0512.2	7.70676	+	chr18	66039691	66041816	peak_179412	gene	66045301	66302739	-	end	4548	Downstream	0	0	ENSMUSG00000046318.15	ENSMUSG00000046318.15	Ccbe1	KNOWN	protein_coding
chr18	66049311	66049360	chr18	66040203	66040217	Rxra_MA0512.2	7.70676	+	chr18	66039691	66041816	peak_179412	gene	66045301	66302739	-	end	4548	Downstream	0	0	ENSMUSG00000046318.15	ENSMUSG00000046318.15	Ccbe1	KNOWN	protein_coding
chr9	108459815	108459864	chr9	108460485	108460499	Rxra_MA0512.2	14.346	+	chr9	108459884	108461483	peak_372927	gene	108460526	108465938	+	start	157	OverlapStart	0.598	0.177	ENSMUSG00000049305.6	ENSMUSG00000049305.6	Ccdc71	KNOWN	protein_coding
chr7	16275555	16275675	chr7	16285488	16285502	Rxra_MA0512.2	4.89989	+	chr7	16285479	16286930	peak_315566	gene	16274041	16286795	-	start	591	OverlapStart	0.907	0.103	ENSMUSG00000041375.18	ENSMUSG00000041375.18	Ccdc9	KNOWN	protein_coding
chr7	25719908	25719957	chr7	25719088	25719102	Rxra_MA0512.2	3.33373	+	chr7	25718597	25720596	peak_316463	gene	25711105	25719088	-	start	508	OverlapStart	0.246	0.062	ENSMUSG00000002608.8	ENSMUSG00000002608.8	Ccdc97	KNOWN	protein_coding
chr11	83585066	83585115	chr11	83578644	83578658	Rxra_MA0512.2	8.42788	+	chr11	83577057	83579533	peak_62687	gene	83572918	83578636	-	start	341	OverlapStart	0.638	0.276	ENSMUSG00000019122.8	ENSMUSG00000019122.8	Ccl9	KNOWN	protein_coding
chr2	153068024	153068073	chr2	153077654	153077668	Rxra_MA0512.2	3.9332	+	chr2	153077414	153078291	peak_216910	gene	153065954	153081735	+	end	3883	PeakInsideFeature	1	0.056	ENSMUSG00000027474.12	ENSMUSG00000027474.12	Ccm2l	KNOWN	protein_coding
chr4	155807051	155807124	chr4	155812055	155812069	Rxra_MA0512.2	6.7685	-	chr4	155811899	155813047	peak_267923	gene	155812488	155824543	+	start	15	OverlapStart	0.487	0.046	ENSMUSG00000029068.16	ENSMUSG00000029068.16	Ccnl2	KNOWN	protein_coding
chr11	22984706	22984755	chr11	22990930	22990944	Rxra_MA0512.2	5.55085	-	chr11	22990128	22991389	peak_51261	gene	22990518	23003780	+	start	240	OverlapStart	0.691	0.066	ENSMUSG00000007739.10	ENSMUSG00000007739.10	Cct4	KNOWN	protein_coding
chr11	22996378	22996486	chr11	22990930	22990944	Rxra_MA0512.2	5.55085	-	chr11	22990128	22991389	peak_51261	gene	22990518	23003780	+	start	240	OverlapStart	0.691	0.066	ENSMUSG00000007739.10	ENSMUSG00000007739.10	Cct4	KNOWN	protein_coding
chr5	143997346	143997395	chr5	143989257	143989271	Rxra_MA0512.2	4.70694	-	chr5	143988780	143990574	peak_290650	gene	143987908	144014877	-	end	1769	PeakInsideFeature	1	0.067	ENSMUSG00000029617.10	ENSMUSG00000029617.10	Ccz1	KNOWN	protein_coding
chr18	36721390	36721439	chr18	36726808	36726822	Rxra_MA0512.2	3.43347	-	chr18	36725297	36727086	peak_174556	gene	36725073	36726736	-	center	287	OverlapStart	0.804	0.865	ENSMUSG00000051439.6	ENSMUSG00000051439.6	Cd14	KNOWN	protein_coding
chr2	60286195	60286244	chr2	60283873	60283887	Rxra_MA0512.2	3.5171	+	chr2	60282957	60285461	peak_202459	gene	60251992	60284488	-	start	279	OverlapStart	0.611	0.047	ENSMUSG00000060703.12	ENSMUSG00000060703.12	Cd302	KNOWN	protein_coding
chr2	60286195	60286244	chr2	60283922	60283936	Rxra_MA0512.2	5.14063	-	chr2	60282957	60285461	peak_202459	gene	60251992	60284488	-	start	279	OverlapStart	0.611	0.047	ENSMUSG00000060703.12	ENSMUSG00000060703.12	Cd302	KNOWN	protein_coding
chr1	194935339	194935388	chr1	194938722	194938736	Rxra_MA0512.2	3.2681	-	chr1	194938368	194940077	peak_28570	gene	194938818	194961279	+	start	404	OverlapStart	0.737	0.056	ENSMUSG00000016494.9	ENSMUSG00000016494.9	Cd34	KNOWN	protein_coding
chr4	134095263	134095312	chr4	134097527	134097541	Rxra_MA0512.2	6.3715	-	chr4	134096976	134097626	peak_263034	gene	134082447	134095082	-	start	2219	Upstream	0	0	ENSMUSG00000000682.7	ENSMUSG00000000682.7	Cd52	KNOWN	protein_coding
chr11	69663659	69663708	chr11	69666455	69666469	Rxra_MA0512.2	3.23968	+	chr11	69665860	69666528	peak_59514	gene	69664212	69666153	-	start	41	OverlapStart	0.439	0.151	ENSMUSG00000018774.13	ENSMUSG00000018774.13	Cd68	KNOWN	protein_coding
chr2	93462654	93462703	chr2	93462746	93462760	Rxra_MA0512.2	3.86856	-	chr2	93461730	93463156	peak_207504	gene	93419110	93463140	-	start	697	OverlapStart	0.989	0.032	ENSMUSG00000027215.13	ENSMUSG00000027215.13	Cd82	KNOWN	protein_coding
chr13	43788650	43788699	chr13	43784942	43784956	Rxra_MA0512.2	4.22045	+	chr13	43784757	43786922	peak_94799	gene	43785106	43803130	+	start	733	OverlapStart	0.839	0.101	ENSMUSG00000015396.3	ENSMUSG00000015396.3	Cd83	KNOWN	protein_coding
chr10	79689458	79689507	chr10	79681547	79681561	Rxra_MA0512.2	12.7842	+	chr10	79681315	79682265	peak_40198	gene	79682194	79688394	+	start	404	OverlapStart	0.075	0.011	ENSMUSG00000020307.14	ENSMUSG00000020307.14	Cdc34	KNOWN	protein_coding
chr12	111373025	111373074	chr12	111378000	111378014	Rxra_MA0512.2	3.18648	-	chr12	111375931	111378501	peak_87494	gene	111292971	111377718	-	start	502	OverlapStart	0.695	0.021	ENSMUSG00000021279.4	ENSMUSG00000021279.4	Cdc42bpb	KNOWN	protein_coding
chr12	111381502	111381590	chr12	111378000	111378014	Rxra_MA0512.2	3.18648	-	chr12	111375931	111378501	peak_87494	gene	111292971	111377718	-	start	502	OverlapStart	0.695	0.021	ENSMUSG00000021279.4	ENSMUSG00000021279.4	Cdc42bpb	KNOWN	protein_coding
chr10	69343065	69343122	chr10	69353091	69353105	Rxra_MA0512.2	3.01614	-	chr10	69352283	69353314	peak_38421	gene	69336634	69352938	-	start	140	OverlapStart	0.635	0.04	ENSMUSG00000019942.12	ENSMUSG00000019942.12	Cdk1	KNOWN	protein_coding
chr1	132117188	132117237	chr1	132125977	132125991	Rxra_MA0512.2	6.93205	-	chr1	132125119	132126550	peak_17216	gene	132112236	132139684	-	center	126	PeakInsideFeature	1	0.052	ENSMUSG00000026437.11	ENSMUSG00000026437.11	Cdk18	KNOWN	protein_coding
chr3	94471363	94471412	chr3	94477857	94477871	Rxra_MA0512.2	2.9085	-	chr3	94477382	94479153	peak_234148	gene	94478294	94492198	+	start	27	OverlapStart	0.485	0.062	ENSMUSG00000028137.9	ENSMUSG00000028137.9	Celf3	KNOWN	protein_coding
chr3	94487977	94488026	chr3	94484353	94484367	Rxra_MA0512.2	3.64822	+	chr3	94483774	94486172	peak_234150	gene	94478294	94492198	+	center	273	PeakInsideFeature	1	0.172	ENSMUSG00000028137.9	ENSMUSG00000028137.9	Celf3	KNOWN	protein_coding
chr18	53748423	53748472	chr18	53744668	53744682	Rxra_MA0512.2	3.93824	-	chr18	53744282	53745497	peak_177117	gene	53681723	53744547	-	start	342	OverlapStart	0.218	0.004	ENSMUSG00000048799.7	ENSMUSG00000048799.7	Cep120	KNOWN	protein_coding
chr11	120085863	120085912	chr11	120086623	120086637	Rxra_MA0512.2	2.79826	-	chr11	120086240	120087222	peak_70511	gene	120064429	120086827	-	start	96	OverlapStart	0.598	0.026	ENSMUSG00000039781.14	ENSMUSG00000039781.14	Cep131	KNOWN	protein_coding
chr11	120094258	120094307	chr11	120086623	120086637	Rxra_MA0512.2	2.79826	-	chr11	120086240	120087222	peak_70511	gene	120064429	120086827	-	start	96	OverlapStart	0.598	0.026	ENSMUSG00000039781.14	ENSMUSG00000039781.14	Cep131	KNOWN	protein_coding
chr18	67802719	67802768	chr18	67800035	67800049	Rxra_MA0512.2	3.31836	+	chr18	67799742	67800689	peak_179732	gene	67800106	67885168	+	start	109	OverlapStart	0.616	0.006	ENSMUSG00000024542.8	ENSMUSG00000024542.8	Cep192	KNOWN	protein_coding
chr18	67803778	67803827	chr18	67800035	67800049	Rxra_MA0512.2	3.31836	+	chr18	67799742	67800689	peak_179732	gene	67800106	67885168	+	start	109	OverlapStart	0.616	0.006	ENSMUSG00000024542.8	ENSMUSG00000024542.8	Cep192	KNOWN	protein_coding
chr18	67647957	67648006	chr18	67641715	67641729	Rxra_MA0512.2	2.87693	-	chr18	67640706	67642012	peak_179694	gene	67617396	67641336	-	start	23	OverlapStart	0.482	0.026	ENSMUSG00000073542.2	ENSMUSG00000073542.2	Cep76	KNOWN	protein_coding
chr8	105145250	105145299	chr8	105153071	105153085	Rxra_MA0512.2	3.14014	-	chr8	105152543	105153547	peak_349842	gene	105131799	105150109	+	end	2936	Downstream	0	0	ENSMUSG00000060560.8	ENSMUSG00000060560.8	Ces4a	KNOWN	protein_coding
chr8	105149725	105149774	chr8	105153071	105153085	Rxra_MA0512.2	3.14014	-	chr8	105152543	105153547	peak_349842	gene	105131799	105150109	+	end	2936	Downstream	0	0	ENSMUSG00000060560.8	ENSMUSG00000060560.8	Ces4a	KNOWN	protein_coding
chr10	75927701	75927750	chr10	75935795	75935809	Rxra_MA0512.2	4.3356	-	chr10	75935537	75936506	peak_39517	gene	75935572	75937725	+	start	449	OverlapStart	0.964	0.434	ENSMUSG00000049422.6	ENSMUSG00000049422.6	Chchd10	KNOWN	protein_coding
chr10	75943465	75943514	chr10	75935795	75935809	Rxra_MA0512.2	4.3356	-	chr10	75935537	75936506	peak_39517	gene	75935572	75937725	+	start	449	OverlapStart	0.964	0.434	ENSMUSG00000049422.6	ENSMUSG00000049422.6	Chchd10	KNOWN	protein_coding
chr5	110860492	110860541	chr5	110859281	110859295	Rxra_MA0512.2	3.27082	-	chr5	110858799	110860719	peak_283234	gene	110839978	110874145	+	center	2698	PeakInsideFeature	1	0.056	ENSMUSG00000029521.7	ENSMUSG00000029521.7	Chek2	KNOWN	protein_coding
chr12	102550212	102550261	chr12	102550812	102550826	Rxra_MA0512.2	4.36781	+	chr12	102550456	102551096	peak_85587	gene	102554968	102565027	+	start	4192	Upstream	0	0	ENSMUSG00000021194.5	ENSMUSG00000021194.5	Chga	KNOWN	protein_coding
chr2	154675284	154675404	chr2	154677523	154677537	Rxra_MA0512.2	3.2487	-	chr2	154676688	154678343	peak_217250	gene	154651704	154694785	+	center	4271	PeakInsideFeature	1	0.038	ENSMUSG00000038467.15	ENSMUSG00000038467.15	Chmp4b	KNOWN	protein_coding
chr7	63211405	63211463	chr7	63212678	63212692	Rxra_MA0512.2	8.65811	-	chr7	63211548	63212887	peak_320685	gene	63098691	63212569	-	start	352	OverlapStart	0.763	0.008	ENSMUSG00000030525.8	ENSMUSG00000030525.8	Chrna7	KNOWN	protein_coding
chr12	86942058	86942107	chr12	86948107	86948121	Rxra_MA0512.2	3.27802	+	chr12	86946472	86948330	peak_83385	gene	86947042	86965362	+	start	359	OverlapStart	0.693	0.07	ENSMUSG00000034157.12	ENSMUSG00000034157.12	Cipc	KNOWN	protein_coding
chr12	86955051	86955128	chr12	86948107	86948121	Rxra_MA0512.2	3.27802	+	chr12	86946472	86948330	peak_83385	gene	86947042	86965362	+	start	359	OverlapStart	0.693	0.07	ENSMUSG00000034157.12	ENSMUSG00000034157.12	Cipc	KNOWN	protein_coding
chr12	111659996	111660045	chr12	111668737	111668751	Rxra_MA0512.2	6.39941	-	chr12	111668337	111669656	peak_87576	gene	111669354	111672338	-	end	358	OverlapEnd	0.229	0.101	ENSMUSG00000001270.8	ENSMUSG00000001270.8	Ckb	KNOWN	protein_coding
chr12	111668754	111668803	chr12	111668737	111668751	Rxra_MA0512.2	6.39941	-	chr12	111668337	111669656	peak_87576	gene	111669354	111672338	-	end	358	OverlapEnd	0.229	0.101	ENSMUSG00000001270.8	ENSMUSG00000001270.8	Ckb	KNOWN	protein_coding
chr12	111668754	111668803	chr12	111671049	111671063	Rxra_MA0512.2	4.61096	+	chr12	111670437	111672814	peak_87577	gene	111669354	111672338	-	start	713	OverlapStart	0.8	0.637	ENSMUSG00000001270.8	ENSMUSG00000001270.8	Ckb	KNOWN	protein_coding
chr12	111677498	111677547	chr12	111668737	111668751	Rxra_MA0512.2	6.39941	-	chr12	111668337	111669656	peak_87576	gene	111669354	111672338	-	end	358	OverlapEnd	0.229	0.101	ENSMUSG00000001270.8	ENSMUSG00000001270.8	Ckb	KNOWN	protein_coding
chr12	111677498	111677547	chr12	111671049	111671063	Rxra_MA0512.2	4.61096	+	chr12	111670437	111672814	peak_87577	gene	111669354	111672338	-	start	713	OverlapStart	0.8	0.637	ENSMUSG00000001270.8	ENSMUSG00000001270.8	Ckb	KNOWN	protein_coding
chr12	111677970	111678082	chr12	111668737	111668751	Rxra_MA0512.2	6.39941	-	chr12	111668337	111669656	peak_87576	gene	111669354	111672338	-	end	358	OverlapEnd	0.229	0.101	ENSMUSG00000001270.8	ENSMUSG00000001270.8	Ckb	KNOWN	protein_coding
chr12	111677970	111678082	chr12	111671049	111671063	Rxra_MA0512.2	4.61096	+	chr12	111670437	111672814	peak_87577	gene	111669354	111672338	-	start	713	OverlapStart	0.8	0.637	ENSMUSG00000001270.8	ENSMUSG00000001270.8	Ckb	KNOWN	protein_coding
chr5	134521577	134521626	chr5	134522210	134522224	Rxra_MA0512.2	3.74979	-	chr5	134519817	134523137	peak_288558	gene	134489382	134552434	-	center	569	PeakInsideFeature	1	0.053	ENSMUSG00000063146.11	ENSMUSG00000063146.11	Clip2	KNOWN	protein_coding
chr9	57763288	57763337	chr9	57764920	57764934	Rxra_MA0512.2	6.87202	+	chr9	57764141	57766759	peak_363766	gene	57750710	57765860	-	start	410	OverlapStart	0.657	0.113	ENSMUSG00000032316.7	ENSMUSG00000032316.7	Clk3	KNOWN	protein_coding
chr13	54618825	54618874	chr13	54610818	54610832	Rxra_MA0512.2	3.0168	+	chr13	54610619	54611863	peak_97067	gene	54592400	54611344	-	start	103	OverlapStart	0.583	0.038	ENSMUSG00000047547.14	ENSMUSG00000047547.14	Cltb	KNOWN	protein_coding
chr11	86752743	86752792	chr11	86757042	86757056	Rxra_MA0512.2	3.32296	-	chr11	86756238	86758478	peak_63401	gene	86694350	86757565	-	start	207	OverlapStart	0.592	0.021	ENSMUSG00000047126.17	ENSMUSG00000047126.17	Cltc	KNOWN	protein_coding
chr4	114983461	114983541	chr4	114986638	114986652	Rxra_MA0512.2	6.75397	+	chr4	114986265	114987654	peak_259155	gene	114959335	114987241	-	start	282	OverlapStart	0.703	0.035	ENSMUSG00000028719.8	ENSMUSG00000028719.8	Cmpk1	KNOWN	protein_coding
chr4	114983461	114983541	chr4	114987515	114987529	Rxra_MA0512.2	7.43238	-	chr4	114986265	114987654	peak_259155	gene	114959335	114987241	-	start	282	OverlapStart	0.703	0.035	ENSMUSG00000028719.8	ENSMUSG00000028719.8	Cmpk1	KNOWN	protein_coding
chr9	114584917	114584966	chr9	114581614	114581628	Rxra_MA0512.2	4.8831	-	chr9	114581254	114582541	peak_374158	gene	114585877	114640200	-	end	3980	Downstream	0	0	ENSMUSG00000056167.6	ENSMUSG00000056167.6	Cnot10	KNOWN	protein_coding
chr9	114590140	114590189	chr9	114581614	114581628	Rxra_MA0512.2	4.8831	-	chr9	114581254	114582541	peak_374158	gene	114585877	114640200	-	end	3980	Downstream	0	0	ENSMUSG00000056167.6	ENSMUSG00000056167.6	Cnot10	KNOWN	protein_coding
chr5	138186043	138186092	chr5	138188150	138188164	Rxra_MA0512.2	3.393	+	chr5	138186808	138188308	peak_289396	gene	138187484	138193918	+	start	74	OverlapStart	0.549	0.128	ENSMUSG00000036968.15	ENSMUSG00000036968.15	Cnpy4	KNOWN	protein_coding
chr1	37423563	37423612	chr1	37429785	37429799	Rxra_MA0512.2	3.47612	-	chr1	37429462	37430696	peak_3860	gene	37417083	37430103	-	start	24	OverlapStart	0.519	0.049	ENSMUSG00000026112.7	ENSMUSG00000026112.7	Coa5	KNOWN	protein_coding
chr1	37423563	37423612	chr1	37430547	37430561	Rxra_MA0512.2	4.03149	+	chr1	37429462	37430696	peak_3860	gene	37417083	37430103	-	start	24	OverlapStart	0.519	0.049	ENSMUSG00000026112.7	ENSMUSG00000026112.7	Coa5	KNOWN	protein_coding
chr10	61980375	61980461	chr10	61980712	61980726	Rxra_MA0512.2	3.41316	-	chr10	61980242	61980882	peak_37290	gene	61838235	61979108	-	start	1454	Upstream	0	0	ENSMUSG00000058806.14	ENSMUSG00000058806.14	Col13a1	KNOWN	protein_coding
chr14	101637878	101637979	chr14	101640592	101640606	Rxra_MA0512.2	2.91799	+	chr14	101639915	101640962	peak_121867	gene	101633765	101640686	-	start	248	OverlapStart	0.736	0.111	ENSMUSG00000075486.9	ENSMUSG00000075486.9	Commd6	KNOWN	protein_coding
chr14	21841000	21841049	chr14	21847753	21847767	Rxra_MA0512.2	2.70823	+	chr14	21847386	21849261	peak_109911	gene	21845860	21848977	-	start	654	OverlapStart	0.849	0.51	ENSMUSG00000021773.10	ENSMUSG00000021773.10	Comtd1	KNOWN	protein_coding
chr14	21841000	21841049	chr14	21848267	21848281	Rxra_MA0512.2	3.49897	+	chr14	21847386	21849261	peak_109911	gene	21845860	21848977	-	start	654	OverlapStart	0.849	0.51	ENSMUSG00000021773.10	ENSMUSG00000021773.10	Comtd1	KNOWN	protein_coding
chr8	70306936	70306985	chr8	70302597	70302611	Rxra_MA0512.2	5.07948	-	chr8	70302119	70303163	peak_344515	gene	70302517	70312993	+	start	124	OverlapStart	0.619	0.062	ENSMUSG00000055681.14	ENSMUSG00000055681.14	Cope	KNOWN	protein_coding
chr6	87885147	87885197	chr6	87887671	87887685	Rxra_MA0512.2	2.68957	-	chr6	87887462	87888301	peak_303794	gene	87887813	87913595	+	start	68	OverlapStart	0.582	0.019	ENSMUSG00000030058.17	ENSMUSG00000030058.17	Copg1	KNOWN	protein_coding
chr8	13879788	13879837	chr8	13889765	13889779	Rxra_MA0512.2	6.74891	+	chr8	13889151	13890733	peak_337237	gene	13884793	13890281	-	start	339	OverlapStart	0.714	0.206	ENSMUSG00000031458.8	ENSMUSG00000031458.8	Coprs	KNOWN	protein_coding
chr5	138163384	138163433	chr5	138160885	138160899	Rxra_MA0512.2	9.46692	+	chr5	138160664	138161695	peak_289393	gene	138161070	138164646	+	start	109	OverlapStart	0.606	0.175	ENSMUSG00000019494.14	ENSMUSG00000019494.14	Cops6	KNOWN	protein_coding
chr11	90644883	90644932	chr11	90638832	90638846	Rxra_MA0512.2	3.78148	+	chr11	90637545	90638937	peak_64179	gene	90638172	90644931	+	start	69	OverlapStart	0.55	0.113	ENSMUSG00000020544.14	ENSMUSG00000020544.14	Cox11	KNOWN	protein_coding
chr7	140897242	140897291	chr7	140903487	140903501	Rxra_MA0512.2	3.34699	+	chr7	140901384	140903716	peak_334416	gene	140898944	140900446	-	start	2104	Upstream	0	0	ENSMUSG00000025488.9	ENSMUSG00000025488.9	Cox8b	KNOWN	protein_coding
chr19	3323179	3323228	chr19	3324016	3324030	Rxra_MA0512.2	4.69388	+	chr19	3321654	3325991	peak_183084	gene	3323300	3385732	+	start	522	OverlapStart	0.62	0.043	ENSMUSG00000024900.4	ENSMUSG00000024900.4	Cpt1a	KNOWN	protein_coding
chr19	3323179	3323228	chr19	3325498	3325512	Rxra_MA0512.2	3.06542	-	chr19	3321654	3325991	peak_183084	gene	3323300	3385732	+	start	522	OverlapStart	0.62	0.043	ENSMUSG00000024900.4	ENSMUSG00000024900.4	Cpt1a	KNOWN	protein_coding
chr19	3323179	3323228	chr19	3325651	3325665	Rxra_MA0512.2	4.35402	-	chr19	3321654	3325991	peak_183084	gene	3323300	3385732	+	start	522	OverlapStart	0.62	0.043	ENSMUSG00000024900.4	ENSMUSG00000024900.4	Cpt1a	KNOWN	protein_coding
chr2	30419449	30419498	chr2	30415443	30415457	Rxra_MA0512.2	3.5626	+	chr2	30415111	30416492	peak_197769	gene	30400470	30415813	-	start	12	OverlapStart	0.508	0.046	ENSMUSG00000026853.15	ENSMUSG00000026853.15	Crat	KNOWN	protein_coding
chr6	37446187	37446236	chr6	37441960	37441974	Rxra_MA0512.2	5.53079	-	chr6	37441627	37442714	peak_296919	gene	37327254	37442146	-	start	24	OverlapStart	0.477	0.004	ENSMUSG00000038648.5	ENSMUSG00000038648.5	Creb3l2	KNOWN	protein_coding
chr6	37446187	37446236	chr6	37442157	37442171	Rxra_MA0512.2	3.248	-	chr6	37441627	37442714	peak_296919	gene	37327254	37442146	-	start	24	OverlapStart	0.477	0.004	ENSMUSG00000038648.5	ENSMUSG00000038648.5	Creb3l2	KNOWN	protein_coding
chr6	134861788	134861837	chr6	134862810	134862824	Rxra_MA0512.2	5.30615	-	chr6	134861899	134863540	peak_311932	gene	134830153	134858931	+	end	3788	Downstream	0	0	ENSMUSG00000032652.13	ENSMUSG00000032652.13	Crebl2	KNOWN	protein_coding
chr17	26718556	26718605	chr17	26715989	26716003	Rxra_MA0512.2	2.93657	-	chr17	26715240	26716886	peak_159013	gene	26715649	26776635	+	start	414	OverlapStart	0.752	0.02	ENSMUSG00000048249.14	ENSMUSG00000048249.14	Crebrf	KNOWN	protein_coding
chr17	26718556	26718605	chr17	26716494	26716508	Rxra_MA0512.2	3.95586	+	chr17	26715240	26716886	peak_159013	gene	26715649	26776635	+	start	414	OverlapStart	0.752	0.02	ENSMUSG00000048249.14	ENSMUSG00000048249.14	Crebrf	KNOWN	protein_coding
chr17	26718556	26718605	chr17	26716761	26716775	Rxra_MA0512.2	4.98664	-	chr17	26715240	26716886	peak_159013	gene	26715649	26776635	+	start	414	OverlapStart	0.752	0.02	ENSMUSG00000048249.14	ENSMUSG00000048249.14	Crebrf	KNOWN	protein_coding
chr1	165760853	165760902	chr1	165764234	165764248	Rxra_MA0512.2	4.37271	-	chr1	165763388	165764410	peak_22888	gene	165763745	165775308	+	start	154	OverlapStart	0.651	0.058	ENSMUSG00000040713.12	ENSMUSG00000040713.12	Creg1	KNOWN	protein_coding
chr1	165760853	165760902	chr1	165766641	165766655	Rxra_MA0512.2	5.90363	-	chr1	165766075	165766742	peak_22889	gene	165763745	165775308	+	start	2663	PeakInsideFeature	1	0.058	ENSMUSG00000040713.12	ENSMUSG00000040713.12	Creg1	KNOWN	protein_coding
chr6	113475857	113475906	chr6	113483197	113483211	Rxra_MA0512.2	2.84729	-	chr6	113482516	113483989	peak_308214	gene	113483296	113493343	+	start	44	OverlapStart	0.47	0.069	ENSMUSG00000030284.11	ENSMUSG00000030284.11	Creld1	KNOWN	protein_coding
chr6	113490903	113490952	chr6	113483197	113483211	Rxra_MA0512.2	2.84729	-	chr6	113482516	113483989	peak_308214	gene	113483296	113493343	+	start	44	OverlapStart	0.47	0.069	ENSMUSG00000030284.11	ENSMUSG00000030284.11	Creld1	KNOWN	protein_coding
chr1	93232171	93232220	chr1	93227686	93227700	Rxra_MA0512.2	5.13136	+	chr1	93227166	93228264	peak_13344	gene	93168724	93231072	+	end	3357	PeakInsideFeature	1	0.018	ENSMUSG00000084989.3	ENSMUSG00000084989.3	Crocc2	KNOWN	protein_coding
chr1	93235995	93236044	chr1	93227686	93227700	Rxra_MA0512.2	5.13136	+	chr1	93227166	93228264	peak_13344	gene	93168724	93231072	+	end	3357	PeakInsideFeature	1	0.018	ENSMUSG00000084989.3	ENSMUSG00000084989.3	Crocc2	KNOWN	protein_coding
chr3	90255926	90255975	chr3	90254555	90254569	Rxra_MA0512.2	3.35528	+	chr3	90253672	90255051	peak_233799	gene	90254162	90264125	+	start	199	OverlapStart	0.645	0.089	ENSMUSG00000027936.18	ENSMUSG00000027936.18	Crtc2	KNOWN	protein_coding
chr3	90259228	90259277	chr3	90254555	90254569	Rxra_MA0512.2	3.35528	+	chr3	90253672	90255051	peak_233799	gene	90254162	90264125	+	start	199	OverlapStart	0.645	0.089	ENSMUSG00000027936.18	ENSMUSG00000027936.18	Crtc2	KNOWN	protein_coding
chr10	128330915	128330964	chr10	128337408	128337422	Rxra_MA0512.2	4.19598	+	chr10	128337288	128338698	peak_48235	gene	128337831	128362479	+	start	162	OverlapStart	0.615	0.035	ENSMUSG00000005683.7	ENSMUSG00000005683.7	Cs	KNOWN	protein_coding
chr3	107736833	107736882	chr3	107743884	107743898	Rxra_MA0512.2	5.61502	-	chr3	107742902	107744634	peak_236764	gene	107741047	107760469	-	end	2721	PeakInsideFeature	1	0.089	ENSMUSG00000014599.10	ENSMUSG00000014599.10	Csf1	KNOWN	protein_coding
chr9	56884468	56884517	chr9	56881137	56881151	Rxra_MA0512.2	6.60595	-	chr9	56880623	56883212	peak_363575	gene	56865103	56899870	+	center	569	PeakInsideFeature	1	0.074	ENSMUSG00000032911.5	ENSMUSG00000032911.5	Cspg4	KNOWN	protein_coding
chr9	56903868	56903917	chr9	56900795	56900809	Rxra_MA0512.2	2.86281	-	chr9	56900130	56902111	peak_363582	gene	56865103	56899870	+	end	1250	Downstream	0	0	ENSMUSG00000032911.5	ENSMUSG00000032911.5	Cspg4	KNOWN	protein_coding
chr2	148872853	148872923	chr2	148875850	148875864	Rxra_MA0512.2	6.24073	-	chr2	148874433	148876068	peak_216312	gene	148871721	148875692	-	start	442	OverlapStart	0.77	0.317	ENSMUSG00000027447.6	ENSMUSG00000027447.6	Cst3	KNOWN	protein_coding
chr2	30601804	30601853	chr2	30595083	30595097	Rxra_MA0512.2	4.2598	-	chr2	30594411	30595697	peak_197817	gene	30595039	30608943	+	start	15	OverlapStart	0.512	0.047	ENSMUSG00000047363.4	ENSMUSG00000047363.4	Cstad	KNOWN	protein_coding
chr11	69032731	69032780	chr11	69040066	69040080	Rxra_MA0512.2	6.04169	+	chr11	69039923	69041923	peak_59371	gene	69015910	69036473	+	end	4450	Downstream	0	0	ENSMUSG00000020898.18	ENSMUSG00000020898.18	Ctc1	KNOWN	protein_coding
chr11	69032731	69032780	chr11	69040371	69040385	Rxra_MA0512.2	2.79005	+	chr11	69039923	69041923	peak_59371	gene	69015910	69036473	+	end	4450	Downstream	0	0	ENSMUSG00000020898.18	ENSMUSG00000020898.18	Ctc1	KNOWN	protein_coding
chr8	105687668	105687734	chr8	105685960	105685974	Rxra_MA0512.2	3.27082	+	chr8	105685458	105686915	peak_349978	gene	105636567	105682922	+	end	3264	Downstream	0	0	ENSMUSG00000005698.15	ENSMUSG00000005698.15	Ctcf	KNOWN	protein_coding
chr8	105693999	105694048	chr8	105685960	105685974	Rxra_MA0512.2	3.27082	+	chr8	105685458	105686915	peak_349978	gene	105636567	105682922	+	end	3264	Downstream	0	0	ENSMUSG00000005698.15	ENSMUSG00000005698.15	Ctcf	KNOWN	protein_coding
chr10	126977533	126977582	chr10	126979735	126979749	Rxra_MA0512.2	2.69118	+	chr10	126978190	126981360	peak_47906	gene	126978716	126999975	+	start	1059	OverlapStart	0.834	0.124	ENSMUSG00000078429.8	ENSMUSG00000078429.8	Ctdsp2	KNOWN	protein_coding
chr7	111027937	111027986	chr7	111024425	111024439	Rxra_MA0512.2	3.68952	-	chr7	111023628	111024595	peak_328503	gene	111028950	111056377	+	start	4839	Upstream	0	0	ENSMUSG00000005609.16	ENSMUSG00000005609.16	Ctr9	KNOWN	protein_coding
chr6	117167202	117167251	chr6	117167049	117167063	Rxra_MA0512.2	5.06689	+	chr6	117166927	117169752	peak_309208	gene	117168534	117181367	+	start	195	OverlapStart	0.431	0.095	ENSMUSG00000061353.11	ENSMUSG00000061353.11	Cxcl12	KNOWN	protein_coding
chr6	117167202	117167251	chr6	117168368	117168382	Rxra_MA0512.2	5.85702	+	chr6	117166927	117169752	peak_309208	gene	117168534	117181367	+	start	195	OverlapStart	0.431	0.095	ENSMUSG00000061353.11	ENSMUSG00000061353.11	Cxcl12	KNOWN	protein_coding
chr6	117174272	117174321	chr6	117167049	117167063	Rxra_MA0512.2	5.06689	+	chr6	117166927	117169752	peak_309208	gene	117168534	117181367	+	start	195	OverlapStart	0.431	0.095	ENSMUSG00000061353.11	ENSMUSG00000061353.11	Cxcl12	KNOWN	protein_coding
chr6	117174272	117174321	chr6	117168368	117168382	Rxra_MA0512.2	5.85702	+	chr6	117166927	117169752	peak_309208	gene	117168534	117181367	+	start	195	OverlapStart	0.431	0.095	ENSMUSG00000061353.11	ENSMUSG00000061353.11	Cxcl12	KNOWN	protein_coding
chr7	25406945	25406994	chr7	25402852	25402866	Rxra_MA0512.2	5.67639	-	chr7	25402123	25403199	peak_316402	gene	25400052	25412886	-	end	2609	PeakInsideFeature	1	0.084	ENSMUSG00000060188.6	ENSMUSG00000060188.6	Cxcl17	KNOWN	protein_coding
chr11	46311888	46311937	chr11	46312464	46312478	Rxra_MA0512.2	3.9923	-	chr11	46309135	46312901	peak_54942	gene	46193849	46312859	-	start	1841	OverlapStart	0.989	0.031	ENSMUSG00000020340.16	ENSMUSG00000020340.16	Cyfip2	KNOWN	protein_coding
chr4	96593711	96593782	chr4	96591838	96591852	Rxra_MA0512.2	2.63116	-	chr4	96591022	96592388	peak_255888	gene	96568428	96591578	-	start	127	OverlapStart	0.407	0.024	ENSMUSG00000015224.10	ENSMUSG00000015224.10	Cyp2j9	KNOWN	protein_coding
chr4	115096359	115096410	chr4	115101737	115101751	Rxra_MA0512.2	2.63704	-	chr4	115101550	115102261	peak_259175	gene	115106322	115134281	-	end	4417	Downstream	0	0	ENSMUSG00000047155.13	ENSMUSG00000047155.13	Cyp4x1	KNOWN	protein_coding
chr18	36371993	36372042	chr18	36377717	36377731	Rxra_MA0512.2	5.38781	-	chr18	36376623	36378199	peak_174477	gene	36345618	36402980	+	center	3112	PeakInsideFeature	1	0.027	ENSMUSG00000046727.12	ENSMUSG00000046727.12	Cystm1	KNOWN	protein_coding
chr11	118248102	118248151	chr11	118249244	118249258	Rxra_MA0512.2	4.3203	-	chr11	118247483	118249356	peak_69972	gene	118132018	118248592	-	start	173	OverlapStart	0.592	0.009	ENSMUSG00000017132.17	ENSMUSG00000017132.17	Cyth1	KNOWN	protein_coding
chr11	118257289	118257338	chr11	118249244	118249258	Rxra_MA0512.2	4.3203	-	chr11	118247483	118249356	peak_69972	gene	118132018	118248592	-	start	173	OverlapStart	0.592	0.009	ENSMUSG00000017132.17	ENSMUSG00000017132.17	Cyth1	KNOWN	protein_coding
chr5	143661853	143661902	chr5	143669538	143669552	Rxra_MA0512.2	4.24968	+	chr5	143668227	143670219	peak_290605	gene	143622446	143710250	+	center	2875	PeakInsideFeature	1	0.023	ENSMUSG00000018001.18	ENSMUSG00000018001.18	Cyth3	KNOWN	protein_coding
chr1	97664469	97664518	chr1	97659496	97659510	Rxra_MA0512.2	3.52065	-	chr1	97659336	97659780	peak_13761	gene	97606317	97662074	-	start	2516	PeakInsideFeature	1	0.007	ENSMUSG00000044768.16	ENSMUSG00000044768.16	D1Ertd622e	KNOWN	protein_coding
chr12	36386664	36386713	chr12	36381688	36381702	Rxra_MA0512.2	6.10253	-	chr12	36380826	36382607	peak_75833	gene	36381241	36382181	-	center	5	FeatureInsidePeak	0.528	1	ENSMUSG00000091007.1	ENSMUSG00000091007.1	D630036H23Rik	KNOWN	protein_coding
chr1	120117845	120117894	chr1	120116303	120116317	Rxra_MA0512.2	7.93905	-	chr1	120115274	120116649	peak_15430	gene	120113279	120121078	-	center	1217	PeakInsideFeature	1	0.176	ENSMUSG00000026385.16	ENSMUSG00000026385.16	Dbi	KNOWN	protein_coding
chr1	120117845	120117894	chr1	120120420	120120434	Rxra_MA0512.2	5.66011	-	chr1	120120178	120121778	peak_15431	gene	120113279	120121078	-	start	100	OverlapStart	0.562	0.115	ENSMUSG00000026385.16	ENSMUSG00000026385.16	Dbi	KNOWN	protein_coding
chr2	164500036	164500085	chr2	164490210	164490224	Rxra_MA0512.2	3.05501	-	chr2	164490134	164490324	peak_219430	gene	164486105	164493319	+	center	517	PeakInsideFeature	1	0.026	ENSMUSG00000017734.15	ENSMUSG00000017734.15	Dbndd2	KNOWN	protein_coding
chr9	99569469	99569518	chr9	99575708	99575722	Rxra_MA0512.2	3.85466	+	chr9	99575401	99576388	peak_371087	gene	99575798	99584501	+	start	96	OverlapStart	0.598	0.068	ENSMUSG00000032469.12	ENSMUSG00000032469.12	Dbr1	KNOWN	protein_coding
chr3	116506840	116506934	chr3	116513206	116513220	Rxra_MA0512.2	3.32589	+	chr3	116512756	116513781	peak_237670	gene	116513069	116549981	+	start	199	OverlapStart	0.695	0.019	ENSMUSG00000000340.10	ENSMUSG00000000340.10	Dbt	KNOWN	protein_coding
chr3	116506840	116506934	chr3	116513443	116513457	Rxra_MA0512.2	10.4115	-	chr3	116512756	116513781	peak_237670	gene	116513069	116549981	+	start	199	OverlapStart	0.695	0.019	ENSMUSG00000000340.10	ENSMUSG00000000340.10	Dbt	KNOWN	protein_coding
chr14	118048548	118048597	chr14	118052212	118052226	Rxra_MA0512.2	4.76337	-	chr14	118051331	118053500	peak_123359	gene	118012791	118052246	-	start	169	OverlapStart	0.422	0.023	ENSMUSG00000022129.3	ENSMUSG00000022129.3	Dct	KNOWN	protein_coding
chr14	118048548	118048597	chr14	118052240	118052254	Rxra_MA0512.2	2.67394	+	chr14	118051331	118053500	peak_123359	gene	118012791	118052246	-	start	169	OverlapStart	0.422	0.023	ENSMUSG00000022129.3	ENSMUSG00000022129.3	Dct	KNOWN	protein_coding
chr14	118055264	118055313	chr14	118052212	118052226	Rxra_MA0512.2	4.76337	-	chr14	118051331	118053500	peak_123359	gene	118012791	118052246	-	start	169	OverlapStart	0.422	0.023	ENSMUSG00000022129.3	ENSMUSG00000022129.3	Dct	KNOWN	protein_coding
chr14	118055264	118055313	chr14	118052240	118052254	Rxra_MA0512.2	2.67394	+	chr14	118051331	118053500	peak_123359	gene	118012791	118052246	-	start	169	OverlapStart	0.422	0.023	ENSMUSG00000022129.3	ENSMUSG00000022129.3	Dct	KNOWN	protein_coding
chr8	71475009	71475058	chr8	71468962	71468976	Rxra_MA0512.2	4.45291	-	chr8	71468907	71469584	peak_344755	gene	71469198	71476098	+	start	47	OverlapStart	0.57	0.056	ENSMUSG00000074247.10	ENSMUSG00000074247.10	Dda1	KNOWN	protein_coding
chr8	71475009	71475058	chr8	71469449	71469463	Rxra_MA0512.2	12.3592	-	chr8	71468907	71469584	peak_344755	gene	71469198	71476098	+	start	47	OverlapStart	0.57	0.056	ENSMUSG00000074247.10	ENSMUSG00000074247.10	Dda1	KNOWN	protein_coding
chr8	71475009	71475058	chr8	71469514	71469528	Rxra_MA0512.2	4.32152	-	chr8	71468907	71469584	peak_344755	gene	71469198	71476098	+	start	47	OverlapStart	0.57	0.056	ENSMUSG00000074247.10	ENSMUSG00000074247.10	Dda1	KNOWN	protein_coding
chr4	141721180	141721229	chr4	141723137	141723151	Rxra_MA0512.2	7.66052	+	chr4	141722014	141724061	peak_265076	gene	141677548	141723419	-	start	382	OverlapStart	0.686	0.031	ENSMUSG00000078515.4	ENSMUSG00000078515.4	Ddi2	KNOWN	protein_coding
chr4	141721730	141721779	chr4	141723137	141723151	Rxra_MA0512.2	7.66052	+	chr4	141722014	141724061	peak_265076	gene	141677548	141723419	-	start	382	OverlapStart	0.686	0.031	ENSMUSG00000078515.4	ENSMUSG00000078515.4	Ddi2	KNOWN	protein_coding
chr17	66116446	66116495	chr17	66123430	66123444	Rxra_MA0512.2	4.47009	+	chr17	66122860	66124232	peak_165058	gene	66123519	66152167	+	start	27	OverlapStart	0.52	0.025	ENSMUSG00000035842.9	ENSMUSG00000035842.9	Ddx11	KNOWN	protein_coding
chr17	66128354	66128403	chr17	66123430	66123444	Rxra_MA0512.2	4.47009	+	chr17	66122860	66124232	peak_165058	gene	66123519	66152167	+	start	27	OverlapStart	0.52	0.025	ENSMUSG00000035842.9	ENSMUSG00000035842.9	Ddx11	KNOWN	protein_coding
chr8	110990638	110990687	chr8	110998357	110998371	Rxra_MA0512.2	3.32579	-	chr8	110997224	110998409	peak_350960	gene	110974995	110997800	-	start	16	OverlapStart	0.486	0.025	ENSMUSG00000015023.7	ENSMUSG00000015023.7	Ddx19a	KNOWN	protein_coding
chr8	111000409	111000458	chr8	110998357	110998371	Rxra_MA0512.2	3.32579	-	chr8	110997224	110998409	peak_350960	gene	110974995	110997800	-	start	16	OverlapStart	0.486	0.025	ENSMUSG00000015023.7	ENSMUSG00000015023.7	Ddx19a	KNOWN	protein_coding
chr10	62597317	62597389	chr10	62590380	62590394	Rxra_MA0512.2	4.01063	-	chr10	62590005	62590855	peak_37421	gene	62580247	62602298	-	center	842	PeakInsideFeature	1	0.039	ENSMUSG00000020075.7	ENSMUSG00000020075.7	Ddx21	KNOWN	protein_coding
chr6	135008864	135008957	chr6	135007723	135007737	Rxra_MA0512.2	5.00359	+	chr6	135007586	135008688	peak_311961	gene	135011611	135023776	+	start	3474	Upstream	0	0	ENSMUSG00000030204.10	ENSMUSG00000030204.10	Ddx47	KNOWN	protein_coding
chr6	135015945	135015994	chr6	135007723	135007737	Rxra_MA0512.2	5.00359	+	chr6	135007586	135008688	peak_311961	gene	135011611	135023776	+	start	3474	Upstream	0	0	ENSMUSG00000030204.10	ENSMUSG00000030204.10	Ddx47	KNOWN	protein_coding
chr4	15945814	15945863	chr4	15944822	15944836	Rxra_MA0512.2	4.40266	+	chr4	15944495	15945784	peak_246067	gene	15917239	15945507	-	start	368	OverlapStart	0.785	0.036	ENSMUSG00000028223.8	ENSMUSG00000028223.8	Decr1	KNOWN	protein_coding
chr8	123451750	123451799	chr8	123442858	123442872	Rxra_MA0512.2	5.68695	+	chr8	123442719	123443840	peak_353556	gene	123442985	123463270	+	start	294	OverlapStart	0.763	0.042	ENSMUSG00000001482.14	ENSMUSG00000001482.14	Def8	KNOWN	protein_coding
chr4	86744640	86744689	chr4	86748511	86748525	Rxra_MA0512.2	5.39322	-	chr4	86747998	86749774	peak_254853	gene	86748554	86850603	+	start	332	OverlapStart	0.687	0.012	ENSMUSG00000038024.17	ENSMUSG00000038024.17	Dennd4c	KNOWN	protein_coding
chr5	123911203	123911252	chr5	123906786	123906800	Rxra_MA0512.2	4.07877	-	chr5	123906518	123907670	peak_286457	gene	123907174	123928835	+	start	80	OverlapStart	0.431	0.023	ENSMUSG00000023106.15	ENSMUSG00000023106.15	Denr	KNOWN	protein_coding
chr5	123914459	123914508	chr5	123906786	123906800	Rxra_MA0512.2	4.07877	-	chr5	123906518	123907670	peak_286457	gene	123907174	123928835	+	start	80	OverlapStart	0.431	0.023	ENSMUSG00000023106.15	ENSMUSG00000023106.15	Denr	KNOWN	protein_coding
chr2	104732766	104732815	chr2	104742383	104742397	Rxra_MA0512.2	5.99001	-	chr2	104742351	104743421	peak_209000	gene	104721783	104742878	-	start	8	OverlapStart	0.493	0.025	ENSMUSG00000027173.7	ENSMUSG00000027173.7	Depdc7	KNOWN	protein_coding
chr2	104747107	104747156	chr2	104742383	104742397	Rxra_MA0512.2	5.99001	-	chr2	104742351	104743421	peak_209000	gene	104721783	104742878	-	start	8	OverlapStart	0.493	0.025	ENSMUSG00000027173.7	ENSMUSG00000027173.7	Depdc7	KNOWN	protein_coding
chr1	87848979	87849028	chr1	87849635	87849649	Rxra_MA0512.2	3.41658	-	chr1	87848677	87849777	peak_12012	gene	87853286	87945180	+	start	4059	Upstream	0	0	ENSMUSG00000070738.10	ENSMUSG00000070738.10	Dgkd	KNOWN	protein_coding
chr2	91976239	91976288	chr2	91972067	91972081	Rxra_MA0512.2	5.71927	+	chr2	91971096	91972670	peak_207098	gene	91932823	91975864	-	start	3981	PeakInsideFeature	1	0.037	ENSMUSG00000040479.11	ENSMUSG00000040479.11	Dgkz	KNOWN	protein_coding
chr11	84828473	84828522	chr11	84828392	84828406	Rxra_MA0512.2	5.64062	-	chr11	84828213	84829493	peak_62964	gene	84820855	84828994	-	start	141	OverlapStart	0.61	0.096	ENSMUSG00000034449.7	ENSMUSG00000034449.7	Dhrs11	KNOWN	protein_coding
chr2	158795484	158795533	chr2	158794871	158794885	Rxra_MA0512.2	13.6227	-	chr2	158794201	158795160	peak_218334	gene	158794806	158858214	+	start	126	OverlapStart	0.369	0.005	ENSMUSG00000027655.14	ENSMUSG00000027655.14	Dhx35	KNOWN	protein_coding
chr12	104753547	104753596	chr12	104752133	104752147	Rxra_MA0512.2	10.1542	+	chr12	104751314	104752645	peak_86002	gene	104687741	104751952	-	start	27	OverlapStart	0.479	0.009	ENSMUSG00000041415.9	ENSMUSG00000041415.9	Dicer1	KNOWN	protein_coding
chr12	90733405	90733454	chr12	90734235	90734249	Rxra_MA0512.2	14.4766	+	chr12	90733494	90735795	peak_83943	gene	90724553	90738438	-	center	3149	PeakInsideFeature	1	0.166	ENSMUSG00000007682.5	ENSMUSG00000007682.5	Dio2	KNOWN	protein_coding
chr12	90733405	90733454	chr12	90738960	90738974	Rxra_MA0512.2	3.80609	-	chr12	90737519	90739246	peak_83945	gene	90724553	90738438	-	start	56	OverlapStart	0.532	0.066	ENSMUSG00000007682.5	ENSMUSG00000007682.5	Dio2	KNOWN	protein_coding
chr9	50743746	50743795	chr9	50739618	50739632	Rxra_MA0512.2	5.32815	-	chr9	50739086	50739772	peak_362424	gene	50662751	50739517	-	start	88	OverlapStart	0.628	0.005	ENSMUSG00000032064.17	ENSMUSG00000032064.17	Dixdc1	KNOWN	protein_coding
chr9	50744822	50744871	chr9	50739618	50739632	Rxra_MA0512.2	5.32815	-	chr9	50739086	50739772	peak_362424	gene	50662751	50739517	-	start	88	OverlapStart	0.628	0.005	ENSMUSG00000032064.17	ENSMUSG00000032064.17	Dixdc1	KNOWN	protein_coding
chr9	50657041	50657159	chr9	50660627	50660641	Rxra_MA0512.2	3.25294	-	chr9	50658692	50660721	peak_362402	gene	50634632	50659780	-	start	74	OverlapStart	0.536	0.043	ENSMUSG00000000168.9	ENSMUSG00000000168.9	Dlat	KNOWN	protein_coding
chr9	50657794	50657843	chr9	50660627	50660641	Rxra_MA0512.2	3.25294	-	chr9	50658692	50660721	peak_362402	gene	50634632	50659780	-	start	74	OverlapStart	0.536	0.043	ENSMUSG00000000168.9	ENSMUSG00000000168.9	Dlat	KNOWN	protein_coding
chr9	50659695	50659744	chr9	50660627	50660641	Rxra_MA0512.2	3.25294	-	chr9	50658692	50660721	peak_362402	gene	50634632	50659780	-	start	74	OverlapStart	0.536	0.043	ENSMUSG00000000168.9	ENSMUSG00000000168.9	Dlat	KNOWN	protein_coding
chr12	31346773	31346880	chr12	31351033	31351047	Rxra_MA0512.2	3.0905	+	chr12	31350733	31351784	peak_74914	gene	31331563	31351437	-	start	179	OverlapStart	0.67	0.035	ENSMUSG00000020664.9	ENSMUSG00000020664.9	Dld	KNOWN	protein_coding
chr7	19082665	19082714	chr7	19080537	19080551	Rxra_MA0512.2	4.37378	-	chr7	19080502	19080820	peak_315868	gene	19076226	19082776	+	center	1160	PeakInsideFeature	1	0.049	ENSMUSG00000030410.16	ENSMUSG00000030410.16	Dmwd	KNOWN	protein_coding
chr10	62976052	62976101	chr10	62972086	62972100	Rxra_MA0512.2	3.42051	+	chr10	62971140	62973083	peak_37494	gene	62947025	62974185	+	end	2074	PeakInsideFeature	1	0.072	ENSMUSG00000036875.15	ENSMUSG00000036875.15	Dna2	KNOWN	protein_coding
chr11	69411324	69411379	chr11	69417755	69417769	Rxra_MA0512.2	6.89594	-	chr11	69417502	69420458	peak_59454	gene	69420808	69549110	-	end	1828	Downstream	0	0	ENSMUSG00000005237.14	ENSMUSG00000005237.14	Dnah2	KNOWN	protein_coding
chr11	69411324	69411379	chr11	69419473	69419487	Rxra_MA0512.2	2.9777	+	chr11	69417502	69420458	peak_59454	gene	69420808	69549110	-	end	1828	Downstream	0	0	ENSMUSG00000005237.14	ENSMUSG00000005237.14	Dnah2	KNOWN	protein_coding
chr8	85560276	85560325	chr8	85555045	85555059	Rxra_MA0512.2	6.53688	+	chr8	85554375	85556114	peak_346997	gene	85537632	85555344	-	start	100	OverlapStart	0.557	0.055	ENSMUSG00000031701.6	ENSMUSG00000031701.6	Dnaja2	KNOWN	protein_coding
chr8	85560276	85560325	chr8	85555360	85555374	Rxra_MA0512.2	13.5903	-	chr8	85554375	85556114	peak_346997	gene	85537632	85555344	-	start	100	OverlapStart	0.557	0.055	ENSMUSG00000031701.6	ENSMUSG00000031701.6	Dnaja2	KNOWN	protein_coding
chr4	151930126	151930175	chr4	151933733	151933747	Rxra_MA0512.2	7.62521	+	chr4	151933219	151934171	peak_266970	gene	151933690	151982137	+	start	5	OverlapStart	0.505	0.009	ENSMUSG00000039768.16	ENSMUSG00000039768.16	Dnajc11	KNOWN	protein_coding
chr15	99088468	99088517	chr15	99093744	99093758	Rxra_MA0512.2	3.97393	+	chr15	99093129	99094933	peak_139465	gene	99093169	99104737	+	start	862	OverlapStart	0.978	0.152	ENSMUSG00000038009.7	ENSMUSG00000038009.7	Dnajc22	KNOWN	protein_coding
chr12	3809184	3809233	chr12	3806316	3806330	Rxra_MA0512.2	2.68338	-	chr12	3806185	3808933	peak_71131	gene	3806006	3914443	+	start	1553	PeakInsideFeature	1	0.025	ENSMUSG00000020661.15	ENSMUSG00000020661.15	Dnmt3a	KNOWN	protein_coding
chr12	3809184	3809233	chr12	3808601	3808615	Rxra_MA0512.2	4.28514	-	chr12	3806185	3808933	peak_71131	gene	3806006	3914443	+	start	1553	PeakInsideFeature	1	0.025	ENSMUSG00000020661.15	ENSMUSG00000020661.15	Dnmt3a	KNOWN	protein_coding
chrX	35893084	35893133	chrX	35888475	35888489	Rxra_MA0512.2	6.47883	-	chrX	35888160	35890022	peak_378094	gene	35888831	36076562	+	start	260	OverlapStart	0.64	0.006	ENSMUSG00000031093.14	ENSMUSG00000031093.14	Dock11	KNOWN	protein_coding
chrX	35893084	35893133	chrX	35888608	35888622	Rxra_MA0512.2	4.59292	-	chrX	35888160	35890022	peak_378094	gene	35888831	36076562	+	start	260	OverlapStart	0.64	0.006	ENSMUSG00000031093.14	ENSMUSG00000031093.14	Dock11	KNOWN	protein_coding
chr9	21855457	21855506	chr9	21852687	21852701	Rxra_MA0512.2	3.6002	-	chr9	21852370	21853100	peak_356849	gene	21800183	21852635	-	start	100	OverlapStart	0.363	0.005	ENSMUSG00000032198.8	ENSMUSG00000032198.8	Dock6	KNOWN	protein_coding
chr10	80756209	80756258	chr10	80757710	80757724	Rxra_MA0512.2	5.00918	+	chr10	80757574	80758169	peak_40477	gene	80755205	80795461	+	start	2666	PeakInsideFeature	1	0.015	ENSMUSG00000061589.14	ENSMUSG00000061589.14	Dot1l	KNOWN	protein_coding
chr10	80756606	80756655	chr10	80757710	80757724	Rxra_MA0512.2	5.00918	+	chr10	80757574	80758169	peak_40477	gene	80755205	80795461	+	start	2666	PeakInsideFeature	1	0.015	ENSMUSG00000061589.14	ENSMUSG00000061589.14	Dot1l	KNOWN	protein_coding
chr19	5426676	5426750	chr19	5425432	5425446	Rxra_MA0512.2	4.13049	-	chr19	5424039	5425754	peak_183608	gene	5422804	5424979	-	start	83	OverlapStart	0.548	0.432	ENSMUSG00000024914.16	ENSMUSG00000024914.16	Drap1	KNOWN	protein_coding
chr10	127193874	127193923	chr10	127194867	127194881	Rxra_MA0512.2	8.39384	-	chr10	127194504	127196897	peak_47961	gene	127190377	127195728	-	start	28	OverlapStart	0.511	0.229	ENSMUSG00000040415.15	ENSMUSG00000040415.15	Dtx3	KNOWN	protein_coding
chr10	127193874	127193923	chr10	127195326	127195340	Rxra_MA0512.2	3.57163	+	chr10	127194504	127196897	peak_47961	gene	127190377	127195728	-	start	28	OverlapStart	0.511	0.229	ENSMUSG00000040415.15	ENSMUSG00000040415.15	Dtx3	KNOWN	protein_coding
chr10	127193874	127193923	chr10	127195878	127195892	Rxra_MA0512.2	6.6543	-	chr10	127194504	127196897	peak_47961	gene	127190377	127195728	-	start	28	OverlapStart	0.511	0.229	ENSMUSG00000040415.15	ENSMUSG00000040415.15	Dtx3	KNOWN	protein_coding
chr10	127204471	127204520	chr10	127194867	127194881	Rxra_MA0512.2	8.39384	-	chr10	127194504	127196897	peak_47961	gene	127190377	127195728	-	start	28	OverlapStart	0.511	0.229	ENSMUSG00000040415.15	ENSMUSG00000040415.15	Dtx3	KNOWN	protein_coding
chr10	127204471	127204520	chr10	127195326	127195340	Rxra_MA0512.2	3.57163	+	chr10	127194504	127196897	peak_47961	gene	127190377	127195728	-	start	28	OverlapStart	0.511	0.229	ENSMUSG00000040415.15	ENSMUSG00000040415.15	Dtx3	KNOWN	protein_coding
chr10	127204471	127204520	chr10	127195878	127195892	Rxra_MA0512.2	6.6543	-	chr10	127194504	127196897	peak_47961	gene	127190377	127195728	-	start	28	OverlapStart	0.511	0.229	ENSMUSG00000040415.15	ENSMUSG00000040415.15	Dtx3	KNOWN	protein_coding
chr8	105981754	105981847	chr8	105990984	105990998	Rxra_MA0512.2	4.97759	+	chr8	105990670	105991474	peak_350044	gene	105991336	106053840	+	start	264	OverlapStart	0.172	0.002	ENSMUSG00000031901.12	ENSMUSG00000031901.12	Dus2	KNOWN	protein_coding
chr14	21752308	21752385	chr14	21751583	21751597	Rxra_MA0512.2	5.36348	+	chr14	21750117	21751811	peak_109883	gene	21733393	21751181	-	start	217	OverlapStart	0.628	0.06	ENSMUSG00000021768.15	ENSMUSG00000021768.15	Dusp13	KNOWN	protein_coding
chr2	152935227	152935276	chr2	152939969	152939983	Rxra_MA0512.2	2.6689	+	chr2	152939337	152940681	peak_216877	gene	152940996	152951698	-	end	987	Downstream	0	0	ENSMUSG00000042662.16	ENSMUSG00000042662.16	Dusp15	KNOWN	protein_coding
chr13	30662872	30662921	chr13	30658364	30658378	Rxra_MA0512.2	3.24355	+	chr13	30658323	30660758	peak_92410	gene	30659998	30711231	+	start	458	OverlapStart	0.312	0.015	ENSMUSG00000069255.12	ENSMUSG00000069255.12	Dusp22	KNOWN	protein_coding
chr1	172635067	172635116	chr1	172632677	172632691	Rxra_MA0512.2	3.13866	+	chr1	172632403	172633460	peak_24309	gene	172630763	172632962	-	start	31	OverlapStart	0.529	0.254	ENSMUSG00000026544.6	ENSMUSG00000026544.6	Dusp23	KNOWN	protein_coding
chr8	31097018	31097067	chr8	31097359	31097373	Rxra_MA0512.2	2.6689	+	chr8	31096735	31097729	peak_339827	gene	31089470	31097047	+	end	185	OverlapEnd	0.314	0.041	ENSMUSG00000039661.14	ENSMUSG00000039661.14	Dusp26	KNOWN	protein_coding
chrX	9655553	9655632	chrX	9663066	9663080	Rxra_MA0512.2	9.40272	+	chrX	9662244	9663323	peak_376685	gene	9654266	9663003	-	start	220	OverlapStart	0.703	0.087	ENSMUSG00000031176.8	ENSMUSG00000031176.8	Dynlt3	KNOWN	protein_coding
chr7	28176590	28176639	chr7	28180170	28180184	Rxra_MA0512.2	3.44686	-	chr7	28179117	28180289	peak_316715	gene	28179468	28187294	+	start	235	OverlapStart	0.701	0.105	ENSMUSG00000002409.18	ENSMUSG00000002409.18	Dyrk1b	KNOWN	protein_coding
chr10	118873066	118873115	chr10	118869798	118869812	Rxra_MA0512.2	3.6071	-	chr10	118867472	118870609	peak_46670	gene	118859348	118868903	-	start	137	OverlapStart	0.456	0.15	ENSMUSG00000028630.8	ENSMUSG00000028630.8	Dyrk2	KNOWN	protein_coding
chr4	97774412	97774461	chr4	97777760	97777774	Rxra_MA0512.2	12.6319	+	chr4	97777293	97779229	peak_256005	gene	97568132	97778078	-	start	183	OverlapStart	0.405	0.003	ENSMUSG00000048747.14	ENSMUSG00000048747.14	E130114P18Rik	KNOWN	protein_coding
chr17	24429408	24429496	chr17	24429245	24429259	Rxra_MA0512.2	3.06542	-	chr17	24429200	24429764	peak_158459	gene	24426682	24439316	+	start	2800	PeakInsideFeature	1	0.045	ENSMUSG00000024132.5	ENSMUSG00000024132.5	Eci1	KNOWN	protein_coding
chr3	95736168	95736217	chr3	95733028	95733042	Rxra_MA0512.2	11.1547	+	chr3	95731720	95734308	peak_234443	gene	95734146	95739569	-	end	1132	OverlapEnd	0.063	0.03	ENSMUSG00000028108.15	ENSMUSG00000028108.15	Ecm1	KNOWN	protein_coding
chr8	105872689	105872738	chr8	105880867	105880881	Rxra_MA0512.2	2.98765	+	chr8	105880440	105881725	peak_350025	gene	105880880	105894908	+	start	202	OverlapStart	0.658	0.06	ENSMUSG00000036270.16	ENSMUSG00000036270.16	Edc4	KNOWN	protein_coding
chr8	105873177	105873270	chr8	105880867	105880881	Rxra_MA0512.2	2.98765	+	chr8	105880440	105881725	peak_350025	gene	105880880	105894908	+	start	202	OverlapStart	0.658	0.06	ENSMUSG00000036270.16	ENSMUSG00000036270.16	Edc4	KNOWN	protein_coding
chr8	105873530	105873579	chr8	105880867	105880881	Rxra_MA0512.2	2.98765	+	chr8	105880440	105881725	peak_350025	gene	105880880	105894908	+	start	202	OverlapStart	0.658	0.06	ENSMUSG00000036270.16	ENSMUSG00000036270.16	Edc4	KNOWN	protein_coding
chr8	105880789	105880847	chr8	105880867	105880881	Rxra_MA0512.2	2.98765	+	chr8	105880440	105881725	peak_350025	gene	105880880	105894908	+	start	202	OverlapStart	0.658	0.06	ENSMUSG00000036270.16	ENSMUSG00000036270.16	Edc4	KNOWN	protein_coding
chr13	42299971	42300053	chr13	42302818	42302832	Rxra_MA0512.2	3.76097	-	chr13	42300502	42302861	peak_94370	gene	42301269	42307989	+	start	412	OverlapStart	0.675	0.237	ENSMUSG00000021367.7	ENSMUSG00000021367.7	Edn1	KNOWN	protein_coding
chr18	34847051	34847158	chr18	34855555	34855569	Rxra_MA0512.2	2.92954	-	chr18	34855120	34856529	peak_174071	gene	34859822	34864984	+	start	3998	Upstream	0	0	ENSMUSG00000038418.7	ENSMUSG00000038418.7	Egr1	KNOWN	protein_coding
chr19	5716525	5716574	chr19	5724925	5724939	Rxra_MA0512.2	5.89147	+	chr19	5724476	5725352	peak_183676	gene	5707375	5726317	-	start	1403	PeakInsideFeature	1	0.046	ENSMUSG00000024937.14	ENSMUSG00000024937.14	Ehbp1l1	KNOWN	protein_coding
chr16	20501864	20501913	chr16	20509554	20509568	Rxra_MA0512.2	11.4931	-	chr16	20508259	20511733	peak_143899	gene	20498816	20509955	+	end	41	OverlapEnd	0.488	0.152	ENSMUSG00000003235.12	ENSMUSG00000003235.12	Eif2b5	KNOWN	protein_coding
chr7	108934629	108934678	chr7	108934128	108934142	Rxra_MA0512.2	2.64781	-	chr7	108933924	108934791	peak_327995	gene	108934416	108942951	+	start	59	OverlapStart	0.433	0.044	ENSMUSG00000031029.6	ENSMUSG00000031029.6	Eif3f	KNOWN	protein_coding
chr7	108934629	108934678	chr7	108944133	108944147	Rxra_MA0512.2	4.20988	-	chr7	108942728	108944598	peak_327997	gene	108934416	108942951	+	end	712	OverlapEnd	0.119	0.026	ENSMUSG00000031029.6	ENSMUSG00000031029.6	Eif3f	KNOWN	protein_coding
chr7	108947694	108947743	chr7	108944133	108944147	Rxra_MA0512.2	4.20988	-	chr7	108942728	108944598	peak_327997	gene	108934416	108942951	+	end	712	OverlapEnd	0.119	0.026	ENSMUSG00000031029.6	ENSMUSG00000031029.6	Eif3f	KNOWN	protein_coding
chr15	79073429	79073478	chr15	79071735	79071749	Rxra_MA0512.2	2.7996	+	chr15	79071591	79072091	peak_135227	gene	79075222	79094400	+	start	3381	Upstream	0	0	ENSMUSG00000033047.4	ENSMUSG00000033047.4	Eif3l	KNOWN	protein_coding
chr15	102075279	102075328	chr15	102073428	102073442	Rxra_MA0512.2	4.3683	+	chr15	102073385	102074668	peak_140210	gene	102073772	102097172	+	start	254	OverlapStart	0.698	0.038	ENSMUSG00000058655.8	ENSMUSG00000058655.8	Eif4b	KNOWN	protein_coding
chr5	134640303	134640352	chr5	134639745	134639759	Rxra_MA0512.2	9.39412	-	chr5	134638655	134639863	peak_288582	gene	134619720	134639490	-	start	231	OverlapStart	0.691	0.042	ENSMUSG00000040731.13	ENSMUSG00000040731.13	Eif4h	KNOWN	protein_coding
chr1	132008862	132008911	chr1	132008652	132008666	Rxra_MA0512.2	3.54697	+	chr1	132007272	132008744	peak_17179	gene	132007606	132032612	+	start	402	OverlapStart	0.773	0.046	ENSMUSG00000026436.15	ENSMUSG00000026436.15	Elk4	KNOWN	protein_coding
chr8	70541299	70541348	chr8	70538308	70538322	Rxra_MA0512.2	2.66344	-	chr8	70538028	70539876	peak_344581	gene	70539456	70592858	+	start	504	OverlapStart	0.227	0.007	ENSMUSG00000070002.7	ENSMUSG00000070002.7	Ell	KNOWN	protein_coding
chr8	70541299	70541348	chr8	70538385	70538399	Rxra_MA0512.2	3.26312	+	chr8	70538028	70539876	peak_344581	gene	70539456	70592858	+	start	504	OverlapStart	0.227	0.007	ENSMUSG00000070002.7	ENSMUSG00000070002.7	Ell	KNOWN	protein_coding
chr12	108361516	108361565	chr12	108371515	108371529	Rxra_MA0512.2	4.50768	+	chr12	108370428	108372539	peak_86782	gene	108370956	108539617	+	start	527	OverlapStart	0.75	0.009	ENSMUSG00000058070.14	ENSMUSG00000058070.14	Eml1	KNOWN	protein_coding
chr11	29881425	29881474	chr11	29885475	29885489	Rxra_MA0512.2	2.78296	-	chr11	29884171	29885652	peak_52201	gene	29743047	30026033	-	center	371	PeakInsideFeature	1	0.005	ENSMUSG00000044072.14	ENSMUSG00000044072.14	Eml6	KNOWN	protein_coding
chr11	29885226	29885275	chr11	29885475	29885489	Rxra_MA0512.2	2.78296	-	chr11	29884171	29885652	peak_52201	gene	29743047	30026033	-	center	371	PeakInsideFeature	1	0.005	ENSMUSG00000044072.14	ENSMUSG00000044072.14	Eml6	KNOWN	protein_coding
chr3	95627647	95627696	chr3	95625558	95625572	Rxra_MA0512.2	4.84482	+	chr3	95624551	95625598	peak_234408	gene	95624992	95632102	+	start	82	OverlapStart	0.579	0.085	ENSMUSG00000038619.12	ENSMUSG00000038619.12	Ensa	KNOWN	protein_coding
chr17	86757588	86757637	chr17	86754161	86754175	Rxra_MA0512.2	2.95389	-	chr17	86753025	86754473	peak_168722	gene	86753906	86833410	+	start	157	OverlapStart	0.392	0.007	ENSMUSG00000024140.9	ENSMUSG00000024140.9	Epas1	KNOWN	protein_coding
chr4	109283711	109283760	chr4	109280128	109280142	Rxra_MA0512.2	2.84661	-	chr4	109279865	109281288	peak_258615	gene	109280267	109387817	+	start	309	OverlapStart	0.717	0.009	ENSMUSG00000028552.13	ENSMUSG00000028552.13	Eps15	KNOWN	protein_coding
chr14	32512930	32512979	chr14	32513387	32513401	Rxra_MA0512.2	4.8022	+	chr14	32513184	32514165	peak_112376	gene	32513520	32580989	+	start	154	OverlapStart	0.657	0.009	ENSMUSG00000054051.6	ENSMUSG00000054051.6	Ercc6	KNOWN	protein_coding
chr19	44065277	44065326	chr19	44070095	44070109	Rxra_MA0512.2	3.11441	+	chr19	44068973	44070235	peak_189696	gene	44034943	44069785	-	start	181	OverlapStart	0.643	0.023	ENSMUSG00000025198.16	ENSMUSG00000025198.16	Erlin1	KNOWN	protein_coding
chr11	106482890	106482939	chr11	106487975	106487989	Rxra_MA0512.2	5.90833	+	chr11	106487258	106488503	peak_67324	gene	106394649	106487852	-	start	28	OverlapStart	0.477	0.006	ENSMUSG00000020715.9	ENSMUSG00000020715.9	Ern1	KNOWN	protein_coding
chr11	106482890	106482939	chr11	106491570	106491584	Rxra_MA0512.2	5.40695	+	chr11	106491473	106491687	peak_67326	gene	106394649	106487852	-	start	3728	Upstream	0	0	ENSMUSG00000020715.9	ENSMUSG00000020715.9	Ern1	KNOWN	protein_coding
chr9	37526403	37526452	chr9	37528014	37528028	Rxra_MA0512.2	3.19039	-	chr9	37526958	37529130	peak_359722	gene	37528077	37538319	+	start	33	OverlapStart	0.485	0.103	ENSMUSG00000001946.13	ENSMUSG00000001946.13	Esam	KNOWN	protein_coding
chr14	65823938	65823987	chr14	65833785	65833799	Rxra_MA0512.2	3.03503	-	chr14	65833725	65834240	peak_117560	gene	65819037	65833994	-	start	12	OverlapStart	0.522	0.018	ENSMUSG00000022034.9	ENSMUSG00000022034.9	Esco2	KNOWN	protein_coding
chr14	65834522	65834586	chr14	65833785	65833799	Rxra_MA0512.2	3.03503	-	chr14	65833725	65834240	peak_117560	gene	65819037	65833994	-	start	12	OverlapStart	0.522	0.018	ENSMUSG00000022034.9	ENSMUSG00000022034.9	Esco2	KNOWN	protein_coding
chr9	55512163	55512221	chr9	55511867	55511881	Rxra_MA0512.2	4.22194	+	chr9	55511436	55512527	peak_363306	gene	55454507	55512243	-	start	262	OverlapStart	0.74	0.014	ENSMUSG00000032314.14	ENSMUSG00000032314.14	Etfa	KNOWN	protein_coding
chr9	55512163	55512221	chr9	55511888	55511902	Rxra_MA0512.2	7.9223	-	chr9	55511436	55512527	peak_363306	gene	55454507	55512243	-	start	262	OverlapStart	0.74	0.014	ENSMUSG00000032314.14	ENSMUSG00000032314.14	Etfa	KNOWN	protein_coding
chr9	55512163	55512221	chr9	55512306	55512320	Rxra_MA0512.2	4.85275	+	chr9	55511436	55512527	peak_363306	gene	55454507	55512243	-	start	262	OverlapStart	0.74	0.014	ENSMUSG00000032314.14	ENSMUSG00000032314.14	Etfa	KNOWN	protein_coding
chr4	120928782	120928831	chr4	120925228	120925242	Rxra_MA0512.2	3.65728	-	chr4	120924462	120926365	peak_260318	gene	120921195	120925017	-	start	396	OverlapStart	0.292	0.145	ENSMUSG00000028629.9	ENSMUSG00000028629.9	Exo5	KNOWN	protein_coding
chr4	120928782	120928831	chr4	120925649	120925663	Rxra_MA0512.2	4.54797	-	chr4	120924462	120926365	peak_260318	gene	120921195	120925017	-	start	396	OverlapStart	0.292	0.145	ENSMUSG00000028629.9	ENSMUSG00000028629.9	Exo5	KNOWN	protein_coding
chr12	111422807	111422856	chr12	111432202	111432216	Rxra_MA0512.2	3.04658	+	chr12	111432090	111432547	peak_87506	gene	111417429	111431182	+	end	1136	Downstream	0	0	ENSMUSG00000021280.8	ENSMUSG00000021280.8	Exoc3l4	KNOWN	protein_coding
chr12	111441397	111441446	chr12	111432202	111432216	Rxra_MA0512.2	3.04658	+	chr12	111432090	111432547	peak_87506	gene	111417429	111431182	+	end	1136	Downstream	0	0	ENSMUSG00000021280.8	ENSMUSG00000021280.8	Exoc3l4	KNOWN	protein_coding
chr4	132638352	132638401	chr4	132639447	132639461	Rxra_MA0512.2	5.72725	-	chr4	132638631	132639697	peak_262698	gene	132638986	132724765	+	start	178	OverlapStart	0.667	0.008	ENSMUSG00000028886.15	ENSMUSG00000028886.15	Eya3	KNOWN	protein_coding
chr10	86729870	86729919	chr10	86727604	86727618	Rxra_MA0512.2	2.67603	-	chr10	86727445	86728627	peak_41594	gene	86731753	86732409	-	end	3717	Downstream	0	0	ENSMUSG00000056366.4	ENSMUSG00000056366.4	Fabp3-ps1	KNOWN	protein_coding
chr10	86729870	86729919	chr10	86727777	86727791	Rxra_MA0512.2	6.6543	-	chr10	86727445	86728627	peak_41594	gene	86731753	86732409	-	end	3717	Downstream	0	0	ENSMUSG00000056366.4	ENSMUSG00000056366.4	Fabp3-ps1	KNOWN	protein_coding
chr10	86729870	86729919	chr10	86728463	86728477	Rxra_MA0512.2	2.91373	-	chr10	86727445	86728627	peak_41594	gene	86731753	86732409	-	end	3717	Downstream	0	0	ENSMUSG00000056366.4	ENSMUSG00000056366.4	Fabp3-ps1	KNOWN	protein_coding
chr10	86729870	86729919	chr10	86731220	86731234	Rxra_MA0512.2	2.66392	-	chr10	86730766	86731570	peak_41595	gene	86731753	86732409	-	end	585	Downstream	0	0	ENSMUSG00000056366.4	ENSMUSG00000056366.4	Fabp3-ps1	KNOWN	protein_coding
chr7	144589203	144589252	chr7	144581803	144581817	Rxra_MA0512.2	4.43775	-	chr7	144581453	144582825	peak_335271	gene	144577317	144582463	-	start	324	OverlapStart	0.736	0.196	ENSMUSG00000031077.7	ENSMUSG00000031077.7	Fadd	KNOWN	protein_coding
chr7	144591415	144591464	chr7	144581803	144581817	Rxra_MA0512.2	4.43775	-	chr7	144581453	144582825	peak_335271	gene	144577317	144582463	-	start	324	OverlapStart	0.736	0.196	ENSMUSG00000031077.7	ENSMUSG00000031077.7	Fadd	KNOWN	protein_coding
chr19	10183535	10183584	chr19	10182505	10182519	Rxra_MA0512.2	9.05569	+	chr19	10182440	10184456	peak_184346	gene	10182887	10196870	+	start	561	OverlapStart	0.778	0.112	ENSMUSG00000010663.4	ENSMUSG00000010663.4	Fads1	KNOWN	protein_coding
chr19	10183535	10183584	chr19	10183320	10183334	Rxra_MA0512.2	4.78745	-	chr19	10182440	10184456	peak_184346	gene	10182887	10196870	+	start	561	OverlapStart	0.778	0.112	ENSMUSG00000010663.4	ENSMUSG00000010663.4	Fads1	KNOWN	protein_coding
chr19	10183535	10183584	chr19	10188193	10188207	Rxra_MA0512.2	2.86642	+	chr19	10188118	10189072	peak_184347	gene	10182887	10196870	+	center	1283	PeakInsideFeature	1	0.068	ENSMUSG00000010663.4	ENSMUSG00000010663.4	Fads1	KNOWN	protein_coding
chr3	108998651	108998728	chr3	108997944	108997958	Rxra_MA0512.2	6.20329	-	chr3	108996618	108998121	peak_237075	gene	108970996	109027607	-	center	1932	PeakInsideFeature	1	0.027	ENSMUSG00000040339.10	ENSMUSG00000040339.10	Fam102b	KNOWN	protein_coding
chr11	113688952	113689001	chr11	113683981	113683995	Rxra_MA0512.2	4.06374	-	chr11	113683176	113684867	peak_68790	gene	113661318	113684155	-	start	134	OverlapStart	0.579	0.043	ENSMUSG00000041629.7	ENSMUSG00000041629.7	Fam104a	KNOWN	protein_coding
chr13	92490718	92490812	chr13	92483573	92483587	Rxra_MA0512.2	4.06271	+	chr13	92483406	92484481	peak_101908	gene	92449621	92484031	-	start	88	OverlapStart	0.581	0.018	ENSMUSG00000034334.7	ENSMUSG00000034334.7	Fam151b	KNOWN	protein_coding
chr15	31597347	31597407	chr15	31601451	31601465	Rxra_MA0512.2	3.177	-	chr15	31601204	31602787	peak_127961	gene	31601851	31621227	+	start	144	OverlapStart	0.591	0.048	ENSMUSG00000039065.10	ENSMUSG00000039065.10	Fam173b	KNOWN	protein_coding
chr15	31598233	31598304	chr15	31601451	31601465	Rxra_MA0512.2	3.177	-	chr15	31601204	31602787	peak_127961	gene	31601851	31621227	+	start	144	OverlapStart	0.591	0.048	ENSMUSG00000039065.10	ENSMUSG00000039065.10	Fam173b	KNOWN	protein_coding
chr2	12414916	12414971	chr2	12419615	12419629	Rxra_MA0512.2	3.44763	-	chr2	12418104	12419878	peak_194494	gene	12347262	12419470	-	start	479	OverlapStart	0.77	0.019	ENSMUSG00000026767.12	ENSMUSG00000026767.12	Fam188a	KNOWN	protein_coding
chr2	12417518	12417567	chr2	12419615	12419629	Rxra_MA0512.2	3.44763	-	chr2	12418104	12419878	peak_194494	gene	12347262	12419470	-	start	479	OverlapStart	0.77	0.019	ENSMUSG00000026767.12	ENSMUSG00000026767.12	Fam188a	KNOWN	protein_coding
chr8	105614051	105614130	chr8	105622739	105622753	Rxra_MA0512.2	2.95857	-	chr8	105621923	105623546	peak_349964	gene	105605228	105622194	+	end	540	OverlapEnd	0.167	0.016	ENSMUSG00000038604.8	ENSMUSG00000038604.8	Fam65a	KNOWN	protein_coding
chr2	32092494	32092543	chr2	32083852	32083866	Rxra_MA0512.2	3.43977	+	chr2	32083010	32085064	peak_198180	gene	32050054	32084857	-	start	820	OverlapStart	0.899	0.053	ENSMUSG00000050592.8	ENSMUSG00000050592.8	Fam78a	KNOWN	protein_coding
chr2	32092494	32092543	chr2	32084954	32084968	Rxra_MA0512.2	7.52524	-	chr2	32083010	32085064	peak_198180	gene	32050054	32084857	-	start	820	OverlapStart	0.899	0.053	ENSMUSG00000050592.8	ENSMUSG00000050592.8	Fam78a	KNOWN	protein_coding
chr8	120171370	120171419	chr8	120177656	120177670	Rxra_MA0512.2	2.92758	+	chr8	120177291	120178007	peak_352672	gene	120166396	120177466	-	start	183	OverlapStart	0.244	0.016	ENSMUSG00000042269.15	ENSMUSG00000042269.15	Fam92b	KNOWN	protein_coding
chr8	120171370	120171419	chr8	120177723	120177737	Rxra_MA0512.2	3.2857	-	chr8	120177291	120178007	peak_352672	gene	120166396	120177466	-	start	183	OverlapStart	0.244	0.016	ENSMUSG00000042269.15	ENSMUSG00000042269.15	Fam92b	KNOWN	protein_coding
chr1	63730804	63730853	chr1	63730400	63730414	Rxra_MA0512.2	4.72589	+	chr1	63729982	63731026	peak_7976	gene	63730613	63754655	+	start	109	OverlapStart	0.396	0.017	ENSMUSG00000025962.15	ENSMUSG00000025962.15	Fastkd2	KNOWN	protein_coding
chr1	63739022	63739071	chr1	63730400	63730414	Rxra_MA0512.2	4.72589	+	chr1	63729982	63731026	peak_7976	gene	63730613	63754655	+	start	109	OverlapStart	0.396	0.017	ENSMUSG00000025962.15	ENSMUSG00000025962.15	Fastkd2	KNOWN	protein_coding
chr2	130621530	130621579	chr2	130630108	130630122	Rxra_MA0512.2	3.9918	-	chr2	130629154	130630455	peak_213042	gene	130613839	130630027	-	start	223	OverlapStart	0.671	0.054	ENSMUSG00000079043.2	ENSMUSG00000079043.2	Fastkd5	KNOWN	protein_coding
chr2	130634182	130634231	chr2	130630108	130630122	Rxra_MA0512.2	3.9918	-	chr2	130629154	130630455	peak_213042	gene	130613839	130630027	-	start	223	OverlapStart	0.671	0.054	ENSMUSG00000079043.2	ENSMUSG00000079043.2	Fastkd5	KNOWN	protein_coding
chr8	121586490	121586579	chr8	121579161	121579175	Rxra_MA0512.2	6.47883	-	chr8	121578074	121579532	peak_353021	gene	121549439	121578806	-	start	3	OverlapStart	0.502	0.025	ENSMUSG00000052934.13	ENSMUSG00000052934.13	Fbxo31	KNOWN	protein_coding
chr12	59212800	59212865	chr12	59219843	59219857	Rxra_MA0512.2	6.55852	-	chr12	59218917	59220397	peak_78822	gene	59200654	59219725	-	start	68	OverlapStart	0.546	0.042	ENSMUSG00000035329.7	ENSMUSG00000035329.7	Fbxo33	KNOWN	protein_coding
chr9	51959121	51959170	chr9	51963576	51963590	Rxra_MA0512.2	3.06952	-	chr9	51962653	51963868	peak_362673	gene	51943306	51963533	-	start	273	OverlapStart	0.724	0.044	ENSMUSG00000032051.8	ENSMUSG00000032051.8	Fdx1	KNOWN	protein_coding
chr9	50759427	50759476	chr9	50768069	50768083	Rxra_MA0512.2	4.27451	+	chr9	50767665	50768810	peak_362429	gene	50768235	50773348	+	start	2	OverlapStart	0.502	0.112	ENSMUSG00000037845.14	ENSMUSG00000037845.14	Fdxacb1	KNOWN	protein_coding
chr17	56272456	56272505	chr17	56265305	56265319	Rxra_MA0512.2	2.92234	-	chr17	56264028	56266929	peak_163849	gene	56256792	56263608	+	end	1870	Downstream	0	0	ENSMUSG00000043683.3	ENSMUSG00000043683.3	Fem1a	KNOWN	protein_coding
chr17	56272456	56272505	chr17	56266041	56266055	Rxra_MA0512.2	7.93086	+	chr17	56264028	56266929	peak_163849	gene	56256792	56263608	+	end	1870	Downstream	0	0	ENSMUSG00000043683.3	ENSMUSG00000043683.3	Fem1a	KNOWN	protein_coding
chr18	38926793	38926842	chr18	38929565	38929579	Rxra_MA0512.2	5.86714	+	chr18	38928559	38930721	peak_174952	gene	38838672	38929404	-	start	236	OverlapStart	0.391	0.009	ENSMUSG00000036585.15	ENSMUSG00000036585.15	Fgf1	KNOWN	protein_coding
chr7	16798703	16798752	chr7	16804792	16804806	Rxra_MA0512.2	3.68162	-	chr7	16804461	16805120	peak_315694	gene	16809245	16816732	-	end	4455	Downstream	0	0	ENSMUSG00000048920.8	ENSMUSG00000048920.8	Fkrp	KNOWN	protein_coding
chr8	121123419	121123512	chr8	121125353	121125367	Rxra_MA0512.2	3.53944	+	chr8	121124945	121126180	peak_352906	gene	121127939	121130644	+	start	2377	Upstream	0	0	ENSMUSG00000097084.1	ENSMUSG00000097084.1	Foxl1	KNOWN	protein_coding
chr2	121804474	121804523	chr2	121806153	121806167	Rxra_MA0512.2	6.50087	+	chr2	121806110	121807586	peak_211499	gene	121545528	121807087	-	start	239	OverlapStart	0.662	0.003	ENSMUSG00000027238.16	ENSMUSG00000027238.16	Frmd5	KNOWN	protein_coding
chr4	53625222	53625271	chr4	53631414	53631428	Rxra_MA0512.2	5.17773	-	chr4	53630893	53632265	peak_250560	gene	53631470	53707009	+	start	109	OverlapStart	0.579	0.011	ENSMUSG00000054752.16	ENSMUSG00000054752.16	Fsd1l	KNOWN	protein_coding
chr4	53625222	53625271	chr4	53631771	53631785	Rxra_MA0512.2	3.28841	-	chr4	53630893	53632265	peak_250560	gene	53631470	53707009	+	start	109	OverlapStart	0.579	0.011	ENSMUSG00000054752.16	ENSMUSG00000054752.16	Fsd1l	KNOWN	protein_coding
chr4	53632685	53632734	chr4	53631414	53631428	Rxra_MA0512.2	5.17773	-	chr4	53630893	53632265	peak_250560	gene	53631470	53707009	+	start	109	OverlapStart	0.579	0.011	ENSMUSG00000054752.16	ENSMUSG00000054752.16	Fsd1l	KNOWN	protein_coding
chr4	53632685	53632734	chr4	53631771	53631785	Rxra_MA0512.2	3.28841	-	chr4	53630893	53632265	peak_250560	gene	53631470	53707009	+	start	109	OverlapStart	0.579	0.011	ENSMUSG00000054752.16	ENSMUSG00000054752.16	Fsd1l	KNOWN	protein_coding
chr3	152207255	152207304	chr3	152209841	152209855	Rxra_MA0512.2	3.38554	+	chr3	152209531	152211289	peak_242974	gene	152210421	152236826	+	start	11	OverlapStart	0.494	0.033	ENSMUSG00000028034.15	ENSMUSG00000028034.15	Fubp1	KNOWN	protein_coding
chrX	17567193	17567242	chrX	17558944	17558958	Rxra_MA0512.2	4.67699	-	chrX	17558500	17559612	peak_377483	gene	17556563	17572325	-	end	2493	PeakInsideFeature	1	0.071	ENSMUSG00000025040.13	ENSMUSG00000025040.13	Fundc1	KNOWN	protein_coding
chr7	140107644	140107703	chr7	140102088	140102102	Rxra_MA0512.2	7.61754	-	chr7	140101579	140102875	peak_334336	gene	140096769	140102441	-	start	214	OverlapStart	0.665	0.152	ENSMUSG00000025466.19	ENSMUSG00000025466.19	Fuom	KNOWN	protein_coding
chr7	127963616	127963665	chr7	127966902	127966916	Rxra_MA0512.2	7.44953	+	chr7	127966768	127968564	peak_331902	gene	127967456	127985701	+	start	210	OverlapStart	0.617	0.061	ENSMUSG00000030795.18	ENSMUSG00000030795.18	Fus	KNOWN	protein_coding
chr11	102607891	102607940	chr11	102611128	102611142	Rxra_MA0512.2	3.2487	-	chr11	102610163	102611991	peak_66418	gene	102604395	102608058	+	end	3019	Downstream	0	0	ENSMUSG00000050288.6	ENSMUSG00000050288.6	Fzd2	KNOWN	protein_coding
chrX	74419843	74419892	chrX	74429025	74429039	Rxra_MA0512.2	3.72621	-	chrX	74428300	74430018	peak_380143	gene	74409482	74429194	-	start	35	OverlapStart	0.52	0.045	ENSMUSG00000031400.10	ENSMUSG00000031400.10	G6pdx	KNOWN	protein_coding
chr7	111780663	111780712	chr7	111781389	111781403	Rxra_MA0512.2	6.23019	+	chr7	111781252	111782402	peak_328694	gene	111471660	111779977	-	start	1850	Upstream	0	0	ENSMUSG00000038296.14	ENSMUSG00000038296.14	Galnt18	KNOWN	protein_coding
chr13	60171196	60171245	chr13	60177939	60177953	Rxra_MA0512.2	3.53517	+	chr13	60175859	60178911	peak_98393	gene	60174404	60177365	-	start	20	OverlapStart	0.493	0.509	ENSMUSG00000052957.7	ENSMUSG00000052957.7	Gas1	KNOWN	protein_coding
chr13	60178995	60179044	chr13	60177939	60177953	Rxra_MA0512.2	3.53517	+	chr13	60175859	60178911	peak_98393	gene	60174404	60177365	-	start	20	OverlapStart	0.493	0.509	ENSMUSG00000052957.7	ENSMUSG00000052957.7	Gas1	KNOWN	protein_coding
chr8	13497961	13498010	chr8	13494131	13494145	Rxra_MA0512.2	3.12137	+	chr8	13492156	13494840	peak_337140	gene	13465373	13494490	-	start	992	OverlapStart	0.87	0.08	ENSMUSG00000031451.6	ENSMUSG00000031451.6	Gas6	KNOWN	protein_coding
chr12	8298705	8298754	chr12	8302101	8302115	Rxra_MA0512.2	3.65403	-	chr12	8297509	8303032	peak_71882	gene	8297933	8301954	-	center	327	FeatureInsidePeak	0.728	1	ENSMUSG00000037660.4	ENSMUSG00000037660.4	Gdf7	KNOWN	protein_coding
chr13	14056353	14056402	chr13	14062915	14062929	Rxra_MA0512.2	4.33846	-	chr13	14062889	14064147	peak_90291	gene	14052448	14063401	-	start	117	OverlapStart	0.407	0.047	ENSMUSG00000021302.9	ENSMUSG00000021302.9	Ggps1	KNOWN	protein_coding
chr13	14056353	14056402	chr13	14063728	14063742	Rxra_MA0512.2	2.64206	+	chr13	14062889	14064147	peak_90291	gene	14052448	14063401	-	start	117	OverlapStart	0.407	0.047	ENSMUSG00000021302.9	ENSMUSG00000021302.9	Ggps1	KNOWN	protein_coding
chr10	75586717	75586766	chr10	75590001	75590015	Rxra_MA0512.2	2.70272	+	chr10	75588024	75590149	peak_39432	gene	75589339	75617200	+	start	253	OverlapStart	0.381	0.029	ENSMUSG00000006344.16	ENSMUSG00000006344.16	Ggt5	KNOWN	protein_coding
chr2	157351511	157351560	chr2	157348214	157348228	Rxra_MA0512.2	3.6071	-	chr2	157347137	157348278	peak_217939	gene	157329496	157347506	-	start	201	OverlapStart	0.323	0.02	ENSMUSG00000027643.9	ENSMUSG00000027643.9	Ghrh	KNOWN	protein_coding
chr2	180715857	180715906	chr2	180710423	180710437	Rxra_MA0512.2	10.6891	+	chr2	180709424	180711054	peak_222419	gene	180710116	180718733	+	start	123	OverlapStart	0.575	0.109	ENSMUSG00000027573.11	ENSMUSG00000027573.11	Gid8	KNOWN	protein_coding
chr1	97777959	97778036	chr1	97769380	97769394	Rxra_MA0512.2	3.9923	-	chr1	97769181	97770849	peak_13784	gene	97770171	97793709	+	start	156	OverlapStart	0.406	0.029	ENSMUSG00000026333.14	ENSMUSG00000026333.14	Gin1	KNOWN	protein_coding
chr10	81337134	81337183	chr10	81338799	81338813	Rxra_MA0512.2	7.93086	-	chr10	81338509	81338991	peak_40621	gene	81337761	81343266	-	end	989	PeakInsideFeature	1	0.088	ENSMUSG00000034872.5	ENSMUSG00000034872.5	Gipc3	KNOWN	protein_coding
chr11	77505908	77505957	chr11	77498446	77498460	Rxra_MA0512.2	7.07155	-	chr11	77497263	77499736	peak_61193	gene	77493561	77507786	+	center	2174	PeakInsideFeature	1	0.174	ENSMUSG00000011877.13	ENSMUSG00000011877.13	Git1	KNOWN	protein_coding
chr1	119049331	119049380	chr1	119050136	119050150	Rxra_MA0512.2	3.38951	-	chr1	119049844	119050762	peak_15223	gene	118834131	119053619	-	start	3316	PeakInsideFeature	1	0.004	ENSMUSG00000048402.14	ENSMUSG00000048402.14	Gli2	KNOWN	protein_coding
chr2	25809799	25809848	chr2	25815648	25815662	Rxra_MA0512.2	7.40197	-	chr2	25814586	25816274	peak_196644	gene	25793858	25815848	-	start	418	OverlapStart	0.748	0.057	ENSMUSG00000036401.5	ENSMUSG00000036401.5	Glt6d1	KNOWN	protein_coding
chr7	16056778	16056854	chr7	16051934	16051948	Rxra_MA0512.2	6.1834	-	chr7	16051881	16053409	peak_315505	gene	15970671	16047921	-	start	4724	Upstream	0	0	ENSMUSG00000070808.4	ENSMUSG00000070808.4	Gltscr1	KNOWN	protein_coding
chr1	153910752	153910801	chr1	153911375	153911389	Rxra_MA0512.2	5.18235	+	chr1	153909793	153913000	peak_20429	gene	153899943	153909723	+	end	1673	Downstream	0	0	ENSMUSG00000026473.15	ENSMUSG00000026473.15	Glul	KNOWN	protein_coding
chr8	95827004	95827053	chr8	95825375	95825389	Rxra_MA0512.2	8.60517	+	chr8	95825354	95825599	peak_349107	gene	95825353	95826133	+	start	123	PeakInsideFeature	1	0.314	ENSMUSG00000061104.4	ENSMUSG00000061104.4	Gm10094	KNOWN	protein_coding
chr5	125392736	125392785	chr5	125393381	125393395	Rxra_MA0512.2	5.6135	+	chr5	125392723	125394540	peak_286845	gene	125389321	125390554	+	end	3077	Downstream	0	0	ENSMUSG00000072612.2	ENSMUSG00000072612.2	Gm10382	KNOWN	protein_coding
chr15	36871142	36871191	chr15	36873457	36873471	Rxra_MA0512.2	3.3719	-	chr15	36873059	36874140	peak_128811	gene	36870500	36879816	-	center	1559	PeakInsideFeature	1	0.116	ENSMUSG00000072618.2	ENSMUSG00000072618.2	Gm10384	KNOWN	protein_coding
chr9	35506950	35506999	chr9	35508350	35508364	Rxra_MA0512.2	3.50787	-	chr9	35507661	35509973	peak_359487	gene	35509221	35518166	-	end	404	OverlapEnd	0.325	0.084	ENSMUSG00000098590.2	ENSMUSG00000098590.2	Gm1113	KNOWN	protein_coding
chr11	22852491	22852540	chr11	22860213	22860227	Rxra_MA0512.2	7.93905	-	chr11	22858013	22860759	peak_51224	gene	22759737	22859545	-	start	159	OverlapStart	0.558	0.015	ENSMUSG00000101716.1	ENSMUSG00000101716.1	Gm12057	KNOWN	protein_coding
chr11	22852491	22852540	chr11	22860446	22860460	Rxra_MA0512.2	3.92633	-	chr11	22858013	22860759	peak_51224	gene	22759737	22859545	-	start	159	OverlapStart	0.558	0.015	ENSMUSG00000101716.1	ENSMUSG00000101716.1	Gm12057	KNOWN	protein_coding
chr3	96578797	96578846	chr3	96577301	96577315	Rxra_MA0512.2	3.0132	+	chr3	96576253	96577546	peak_234631	gene	96576983	96580663	+	start	84	OverlapStart	0.435	0.153	ENSMUSG00000087610.1	ENSMUSG00000087610.1	Gm16253	KNOWN	protein_coding
chr3	96578797	96578846	chr3	96577381	96577395	Rxra_MA0512.2	3.80427	+	chr3	96576253	96577546	peak_234631	gene	96576983	96580663	+	start	84	OverlapStart	0.435	0.153	ENSMUSG00000087610.1	ENSMUSG00000087610.1	Gm16253	KNOWN	protein_coding
chr3	96578797	96578846	chr3	96577493	96577507	Rxra_MA0512.2	13.1303	+	chr3	96576253	96577546	peak_234631	gene	96576983	96580663	+	start	84	OverlapStart	0.435	0.153	ENSMUSG00000087610.1	ENSMUSG00000087610.1	Gm16253	KNOWN	protein_coding
chr3	96582609	96582658	chr3	96577301	96577315	Rxra_MA0512.2	3.0132	+	chr3	96576253	96577546	peak_234631	gene	96576983	96580663	+	start	84	OverlapStart	0.435	0.153	ENSMUSG00000087610.1	ENSMUSG00000087610.1	Gm16253	KNOWN	protein_coding
chr3	96582609	96582658	chr3	96577381	96577395	Rxra_MA0512.2	3.80427	+	chr3	96576253	96577546	peak_234631	gene	96576983	96580663	+	start	84	OverlapStart	0.435	0.153	ENSMUSG00000087610.1	ENSMUSG00000087610.1	Gm16253	KNOWN	protein_coding
chr3	96582609	96582658	chr3	96577493	96577507	Rxra_MA0512.2	13.1303	+	chr3	96576253	96577546	peak_234631	gene	96576983	96580663	+	start	84	OverlapStart	0.435	0.153	ENSMUSG00000087610.1	ENSMUSG00000087610.1	Gm16253	KNOWN	protein_coding
chr9	22454725	22454774	chr9	22462257	22462271	Rxra_MA0512.2	7.80346	-	chr9	22461506	22462622	peak_356957	gene	22454289	22462062	+	end	2	OverlapEnd	0.498	0.072	ENSMUSG00000091159.1	ENSMUSG00000091159.1	Gm17545	KNOWN	protein_coding
chr9	22462957	22463006	chr9	22462257	22462271	Rxra_MA0512.2	7.80346	-	chr9	22461506	22462622	peak_356957	gene	22454289	22462062	+	end	2	OverlapEnd	0.498	0.072	ENSMUSG00000091159.1	ENSMUSG00000091159.1	Gm17545	KNOWN	protein_coding
chr16	3891953	3892002	chr16	3884381	3884395	Rxra_MA0512.2	4.53586	-	chr16	3884086	3885870	peak_140643	gene	3884647	3919517	+	start	331	OverlapStart	0.686	0.035	ENSMUSG00000093575.1	ENSMUSG00000093575.1	Gm20695	KNOWN	protein_coding
chr2	174343651	174343700	chr2	174344552	174344566	Rxra_MA0512.2	3.84047	-	chr2	174343061	174345094	peak_221587	gene	174330318	174346712	-	start	2635	PeakInsideFeature	1	0.124	ENSMUSG00000090625.1	ENSMUSG00000090625.1	Gm20721	KNOWN	protein_coding
chr5	25983459	25983508	chr5	25980725	25980739	Rxra_MA0512.2	4.48752	+	chr5	25979565	25982785	peak_271286	gene	25982029	25988650	-	end	854	OverlapEnd	0.235	0.114	ENSMUSG00000096045.7	ENSMUSG00000096045.7	Gm21698	KNOWN	protein_coding
chr4	139624460	139624509	chr4	139631336	139631350	Rxra_MA0512.2	3.40046	-	chr4	139630337	139632463	peak_264531	gene	139603185	139662691	+	center	1538	PeakInsideFeature	1	0.036	ENSMUSG00000094439.1	ENSMUSG00000094439.1	Gm21969	KNOWN	protein_coding
chr16	38342540	38342589	chr16	38346881	38346895	Rxra_MA0512.2	9.49901	-	chr16	38346608	38347454	peak_147554	gene	38347039	38362297	+	start	8	OverlapStart	0.491	0.027	ENSMUSG00000095464.1	ENSMUSG00000095464.1	Gm21987	KNOWN	protein_coding
chr17	29616069	29616118	chr17	29614568	29614582	Rxra_MA0512.2	3.10539	+	chr17	29614238	29615962	peak_159778	gene	29614875	29703359	+	start	225	OverlapStart	0.631	0.012	ENSMUSG00000098374.1	ENSMUSG00000098374.1	Gm28043	KNOWN	protein_coding
chr15	102576120	102576169	chr15	102572314	102572328	Rxra_MA0512.2	2.93592	+	chr15	102571517	102573066	peak_140341	gene	102523842	102625067	-	center	2163	PeakInsideFeature	1	0.015	ENSMUSG00000052414.9	ENSMUSG00000052414.9	Gm28047	KNOWN	protein_coding
chr19	6076828	6076877	chr19	6077483	6077497	Rxra_MA0512.2	4.27057	+	chr19	6076620	6077710	peak_183764	gene	6076944	6082256	-	end	221	OverlapEnd	0.703	0.144	ENSMUSG00000100621.1	ENSMUSG00000100621.1	Gm28374	KNOWN	protein_coding
chr5	146562061	146562110	chr5	146552172	146552186	Rxra_MA0512.2	7.41697	+	chr5	146551618	146554262	peak_291074	gene	146556135	146558915	+	start	3195	Upstream	0	0	ENSMUSG00000095557.7	ENSMUSG00000095557.7	Gm3415	KNOWN	protein_coding
chr3	10321298	10321347	chr3	10326908	10326922	Rxra_MA0512.2	3.59603	+	chr3	10326532	10327755	peak_223387	gene	10321711	10335681	-	center	1553	PeakInsideFeature	1	0.088	ENSMUSG00000103392.1	ENSMUSG00000103392.1	Gm38303	KNOWN	protein_coding
chr5	138280272	138280350	chr5	138272679	138272693	Rxra_MA0512.2	4.1669	+	chr5	138271204	138273298	peak_289409	gene	138264951	138279958	-	center	203	PeakInsideFeature	1	0.14	ENSMUSG00000106247.1	ENSMUSG00000106247.1	Gm43720	KNOWN	protein_coding
chr6	87791624	87791673	chr6	87789482	87789496	Rxra_MA0512.2	3.42513	+	chr6	87786810	87791268	peak_303773	gene	87788860	87835795	-	end	179	OverlapEnd	0.54	0.051	ENSMUSG00000107928.1	ENSMUSG00000107928.1	Gm45140	KNOWN	protein_coding
chr13	41656436	41656485	chr13	41660659	41660673	Rxra_MA0512.2	3.03052	-	chr13	41659553	41660860	peak_94212	gene	41655696	41656524	+	end	3682	Downstream	0	0	ENSMUSG00000054258.8	ENSMUSG00000054258.8	Gm5082	KNOWN	protein_coding
chr3	37720009	37720058	chr3	37729376	37729390	Rxra_MA0512.2	8.25712	+	chr3	37728239	37729986	peak_226865	gene	37714189	37724490	-	start	4622	Upstream	0	0	ENSMUSG00000058174.7	ENSMUSG00000058174.7	Gm5148	KNOWN	protein_coding
chr3	37721169	37721218	chr3	37729376	37729390	Rxra_MA0512.2	8.25712	+	chr3	37728239	37729986	peak_226865	gene	37714189	37724490	-	start	4622	Upstream	0	0	ENSMUSG00000058174.7	ENSMUSG00000058174.7	Gm5148	KNOWN	protein_coding
chr15	81842168	81842217	chr15	81839030	81839044	Rxra_MA0512.2	7.26365	-	chr15	81838683	81840166	peak_136010	gene	81843342	81843699	-	end	3918	Downstream	0	0	ENSMUSG00000069439.2	ENSMUSG00000069439.2	Gm8444	KNOWN	protein_coding
chr12	69372985	69373034	chr12	69367770	69367784	Rxra_MA0512.2	4.84123	+	chr12	69367737	69367884	peak_79465	gene	69371834	69372458	-	end	4024	Downstream	0	0	ENSMUSG00000052673.1	ENSMUSG00000052673.1	Gm9887	KNOWN	protein_coding
chr12	69372985	69373034	chr12	69371383	69371397	Rxra_MA0512.2	7.93086	-	chr12	69371317	69372775	peak_79466	gene	69371834	69372458	-	center	100	FeatureInsidePeak	0.428	1	ENSMUSG00000052673.1	ENSMUSG00000052673.1	Gm9887	KNOWN	protein_coding
chr14	46813719	46813768	chr14	46821480	46821494	Rxra_MA0512.2	5.31889	+	chr14	46821240	46822571	peak_114197	gene	46808148	46822242	-	start	337	OverlapStart	0.753	0.071	ENSMUSG00000062014.12	ENSMUSG00000062014.12	Gmfb	KNOWN	protein_coding
chr4	155495716	155495768	chr4	155492631	155492645	Rxra_MA0512.2	5.67401	-	chr4	155490479	155492698	peak_267839	gene	155491360	155559269	+	start	228	OverlapStart	0.603	0.02	ENSMUSG00000029064.15	ENSMUSG00000029064.15	Gnb1	KNOWN	protein_coding
chr4	59036857	59036944	chr4	59036872	59036886	Rxra_MA0512.2	2.99013	+	chr4	59034764	59037178	peak_251624	gene	59035087	59041903	+	start	884	OverlapStart	0.866	0.307	ENSMUSG00000038607.12	ENSMUSG00000038607.12	Gng10	KNOWN	protein_coding
chr4	59036857	59036944	chr4	59036905	59036919	Rxra_MA0512.2	7.64418	-	chr4	59034764	59037178	peak_251624	gene	59035087	59041903	+	start	884	OverlapStart	0.866	0.307	ENSMUSG00000038607.12	ENSMUSG00000038607.12	Gng10	KNOWN	protein_coding
chr14	45385555	45385604	chr14	45389327	45389341	Rxra_MA0512.2	4.11907	-	chr14	45387715	45389604	peak_113968	gene	45376333	45388802	-	start	143	OverlapStart	0.575	0.087	ENSMUSG00000037722.7	ENSMUSG00000037722.7	Gnpnat1	KNOWN	protein_coding
chr10	121360862	121360911	chr10	121364768	121364782	Rxra_MA0512.2	5.84122	+	chr10	121364722	121366429	peak_47076	gene	121365089	121397245	+	start	486	OverlapStart	0.785	0.042	ENSMUSG00000034707.6	ENSMUSG00000034707.6	Gns	KNOWN	protein_coding
chr10	121360862	121360911	chr10	121364799	121364813	Rxra_MA0512.2	3.58528	-	chr10	121364722	121366429	peak_47076	gene	121365089	121397245	+	start	486	OverlapStart	0.785	0.042	ENSMUSG00000034707.6	ENSMUSG00000034707.6	Gns	KNOWN	protein_coding
chr19	43515135	43515184	chr19	43524149	43524163	Rxra_MA0512.2	4.39329	-	chr19	43523376	43525391	peak_189579	gene	43499751	43524605	-	start	222	OverlapStart	0.61	0.049	ENSMUSG00000025190.13	ENSMUSG00000025190.13	Got1	KNOWN	protein_coding
chr15	76343383	76343432	chr15	76336225	76336239	Rxra_MA0512.2	6.34198	-	chr15	76336170	76336345	peak_134598	gene	76331230	76334907	+	end	1350	Downstream	0	0	ENSMUSG00000022561.12	ENSMUSG00000022561.12	Gpaa1	KNOWN	protein_coding
chr4	116558912	116558961	chr4	116556631	116556645	Rxra_MA0512.2	4.06041	+	chr4	116555834	116558067	peak_259356	gene	116557657	116593882	+	start	707	OverlapStart	0.184	0.011	ENSMUSG00000034042.16	ENSMUSG00000034042.16	Gpbp1l1	KNOWN	protein_coding
chr5	31486865	31486914	chr5	31494986	31495000	Rxra_MA0512.2	3.05501	-	chr5	31494386	31495323	peak_272177	gene	31494740	31512904	+	start	114	OverlapStart	0.622	0.032	ENSMUSG00000064037.13	ENSMUSG00000064037.13	Gpn1	KNOWN	protein_coding
chr4	133577176	133577225	chr4	133584585	133584599	Rxra_MA0512.2	6.31514	-	chr4	133583839	133584928	peak_262922	gene	133584361	133591735	+	start	22	OverlapStart	0.521	0.077	ENSMUSG00000028848.13	ENSMUSG00000028848.13	Gpn2	KNOWN	protein_coding
chr4	133580823	133580872	chr4	133584585	133584599	Rxra_MA0512.2	6.31514	-	chr4	133583839	133584928	peak_262922	gene	133584361	133591735	+	start	22	OverlapStart	0.521	0.077	ENSMUSG00000028848.13	ENSMUSG00000028848.13	Gpn2	KNOWN	protein_coding
chr12	112854157	112854206	chr12	112855121	112855135	Rxra_MA0512.2	3.2125	+	chr12	112854584	112855762	peak_87882	gene	112850875	112860916	-	center	722	PeakInsideFeature	1	0.117	ENSMUSG00000021298.7	ENSMUSG00000021298.7	Gpr132	KNOWN	protein_coding
chr12	112858052	112858126	chr12	112855121	112855135	Rxra_MA0512.2	3.2125	+	chr12	112854584	112855762	peak_87882	gene	112850875	112860916	-	center	722	PeakInsideFeature	1	0.117	ENSMUSG00000021298.7	ENSMUSG00000021298.7	Gpr132	KNOWN	protein_coding
chr15	103312672	103312766	chr15	103305782	103305796	Rxra_MA0512.2	4.7645	+	chr15	103304469	103305945	peak_140511	gene	103308235	103310438	-	end	3028	Downstream	0	0	ENSMUSG00000063234.4	ENSMUSG00000063234.4	Gpr84	KNOWN	protein_coding
chr11	98445610	98445659	chr11	98446743	98446757	Rxra_MA0512.2	3.20323	-	chr11	98445880	98448970	peak_65572	gene	98446393	98455373	+	start	1032	OverlapStart	0.834	0.287	ENSMUSG00000019312.10	ENSMUSG00000019312.10	Grb7	KNOWN	protein_coding
chrX	7789311	7789360	chrX	7789861	7789875	Rxra_MA0512.2	6.56715	-	chrX	7789086	7790564	peak_376536	gene	7789764	7820567	+	start	61	OverlapStart	0.541	0.026	ENSMUSG00000031153.16	ENSMUSG00000031153.16	Gripap1	KNOWN	protein_coding
chr6	42248398	42248447	chr6	42245741	42245755	Rxra_MA0512.2	3.2272	+	chr6	42245612	42246352	peak_297781	gene	42245934	42250447	+	start	48	OverlapStart	0.565	0.093	ENSMUSG00000029864.7	ENSMUSG00000029864.7	Gstk1	KNOWN	protein_coding
chr6	42248398	42248447	chr6	42246204	42246218	Rxra_MA0512.2	4.86777	+	chr6	42245612	42246352	peak_297781	gene	42245934	42250447	+	start	48	OverlapStart	0.565	0.093	ENSMUSG00000029864.7	ENSMUSG00000029864.7	Gstk1	KNOWN	protein_coding
chr3	107936602	107936660	chr3	107946165	107946179	Rxra_MA0512.2	4.74545	-	chr3	107945751	107946935	peak_236826	gene	107938846	107943749	-	start	2594	Upstream	0	0	ENSMUSG00000068762.11	ENSMUSG00000068762.11	Gstm6	KNOWN	protein_coding
chr3	107936602	107936660	chr3	107946583	107946597	Rxra_MA0512.2	4.01656	-	chr3	107945751	107946935	peak_236826	gene	107938846	107943749	-	start	2594	Upstream	0	0	ENSMUSG00000068762.11	ENSMUSG00000068762.11	Gstm6	KNOWN	protein_coding
chr3	107945046	107945095	chr3	107946165	107946179	Rxra_MA0512.2	4.74545	-	chr3	107945751	107946935	peak_236826	gene	107938846	107943749	-	start	2594	Upstream	0	0	ENSMUSG00000068762.11	ENSMUSG00000068762.11	Gstm6	KNOWN	protein_coding
chr3	107945046	107945095	chr3	107946583	107946597	Rxra_MA0512.2	4.01656	-	chr3	107945751	107946935	peak_236826	gene	107938846	107943749	-	start	2594	Upstream	0	0	ENSMUSG00000068762.11	ENSMUSG00000068762.11	Gstm6	KNOWN	protein_coding
chr10	75827891	75827947	chr10	75835451	75835465	Rxra_MA0512.2	4.79785	-	chr10	75834229	75836427	peak_39495	gene	75831844	75834881	-	start	447	OverlapStart	0.297	0.215	ENSMUSG00000033318.6	ENSMUSG00000033318.6	Gstt2	KNOWN	protein_coding
chr10	75829768	75829817	chr10	75835451	75835465	Rxra_MA0512.2	4.79785	-	chr10	75834229	75836427	peak_39495	gene	75831844	75834881	-	start	447	OverlapStart	0.297	0.215	ENSMUSG00000033318.6	ENSMUSG00000033318.6	Gstt2	KNOWN	protein_coding
chr2	44932466	44932515	chr2	44926484	44926498	Rxra_MA0512.2	3.35272	-	chr2	44926361	44927733	peak_200331	gene	44564411	44927657	-	start	610	OverlapStart	0.945	0.003	ENSMUSG00000036890.13	ENSMUSG00000036890.13	Gtdc1	KNOWN	protein_coding
chr7	125645148	125645237	chr7	125639214	125639228	Rxra_MA0512.2	3.14169	-	chr7	125638647	125640048	peak_331342	gene	125640953	125707780	-	end	1606	Downstream	0	0	ENSMUSG00000032777.9	ENSMUSG00000032777.9	Gtf3c1	KNOWN	protein_coding
chr2	92384708	92384757	chr2	92374812	92374826	Rxra_MA0512.2	4.28824	+	chr2	92374602	92375718	peak_207199	gene	92365045	92374869	-	start	291	OverlapStart	0.239	0.027	ENSMUSG00000040434.16	ENSMUSG00000040434.16	Gyltl1b	KNOWN	protein_coding
chr2	92384708	92384757	chr2	92375394	92375408	Rxra_MA0512.2	2.62273	+	chr2	92374602	92375718	peak_207199	gene	92365045	92374869	-	start	291	OverlapStart	0.239	0.027	ENSMUSG00000040434.16	ENSMUSG00000040434.16	Gyltl1b	KNOWN	protein_coding
chr2	92384708	92384757	chr2	92375684	92375698	Rxra_MA0512.2	15.1526	-	chr2	92374602	92375718	peak_207199	gene	92365045	92374869	-	start	291	OverlapStart	0.239	0.027	ENSMUSG00000040434.16	ENSMUSG00000040434.16	Gyltl1b	KNOWN	protein_coding
chr2	148687558	148687607	chr2	148681457	148681471	Rxra_MA0512.2	6.47883	+	chr2	148680564	148681763	peak_216279	gene	148681022	148692949	+	start	141	OverlapStart	0.618	0.062	ENSMUSG00000027439.9	ENSMUSG00000027439.9	Gzf1	KNOWN	protein_coding
chr2	148688147	148688196	chr2	148681457	148681471	Rxra_MA0512.2	6.47883	+	chr2	148680564	148681763	peak_216279	gene	148681022	148692949	+	start	141	OverlapStart	0.618	0.062	ENSMUSG00000027439.9	ENSMUSG00000027439.9	Gzf1	KNOWN	protein_coding
chr10	79689458	79689507	chr10	79698249	79698263	Rxra_MA0512.2	7.24952	+	chr10	79697938	79698428	peak_40202	gene	79689019	79695261	+	end	2922	Downstream	0	0	ENSMUSG00000054206.2	ENSMUSG00000054206.2	Gzmm	KNOWN	protein_coding
chr11	116014612	116014742	chr11	116023800	116023814	Rxra_MA0512.2	6.89695	+	chr11	116023775	116024859	peak_69366	gene	116021911	116027962	-	center	619	PeakInsideFeature	1	0.179	ENSMUSG00000016559.14	ENSMUSG00000016559.14	H3f3b	KNOWN	protein_coding
chr8	70081356	70081452	chr8	70088155	70088169	Rxra_MA0512.2	3.01859	-	chr8	70087429	70088581	peak_344461	gene	70083528	70090862	+	center	810	PeakInsideFeature	1	0.157	ENSMUSG00000007594.9	ENSMUSG00000007594.9	Hapln4	KNOWN	protein_coding
chr8	70085080	70085143	chr8	70088155	70088169	Rxra_MA0512.2	3.01859	-	chr8	70087429	70088581	peak_344461	gene	70083528	70090862	+	center	810	PeakInsideFeature	1	0.157	ENSMUSG00000007594.9	ENSMUSG00000007594.9	Hapln4	KNOWN	protein_coding
chrX	73957963	73958012	chrX	73967037	73967051	Rxra_MA0512.2	3.73355	-	chrX	73965436	73968102	peak_380075	gene	73942791	73966357	-	start	412	OverlapStart	0.345	0.039	ENSMUSG00000031386.14	ENSMUSG00000031386.14	Hcfc1	KNOWN	protein_coding
chr10	79727213	79727281	chr10	79728668	79728682	Rxra_MA0512.2	3.71594	-	chr10	79728133	79729996	peak_40210	gene	79716633	79736108	+	center	2694	PeakInsideFeature	1	0.096	ENSMUSG00000020331.9	ENSMUSG00000020331.9	Hcn2	KNOWN	protein_coding
chr6	91152499	91152548	chr6	91153896	91153910	Rxra_MA0512.2	4.05479	-	chr6	91153086	91154197	peak_304470	gene	91156664	91174692	+	start	3023	Upstream	0	0	ENSMUSG00000034245.10	ENSMUSG00000034245.10	Hdac11	KNOWN	protein_coding
chr6	91152499	91152548	chr6	91156067	91156081	Rxra_MA0512.2	5.87337	-	chr6	91155794	91157421	peak_304471	gene	91156664	91174692	+	start	57	OverlapStart	0.465	0.042	ENSMUSG00000034245.10	ENSMUSG00000034245.10	Hdac11	KNOWN	protein_coding
chr2	126587996	126588045	chr2	126597480	126597494	Rxra_MA0512.2	5.2543	-	chr2	126597262	126599492	peak_212220	gene	126593666	126619299	-	end	4711	PeakInsideFeature	1	0.087	ENSMUSG00000027360.5	ENSMUSG00000027360.5	Hdc	KNOWN	protein_coding
chr4	62499317	62499366	chr4	62501972	62501986	Rxra_MA0512.2	4.38746	+	chr4	62501591	62503120	peak_252007	gene	62499007	62503467	-	start	1112	PeakInsideFeature	1	0.343	ENSMUSG00000038422.2	ENSMUSG00000038422.2	Hdhd3	KNOWN	protein_coding
chr4	62499896	62499945	chr4	62501972	62501986	Rxra_MA0512.2	4.38746	+	chr4	62501591	62503120	peak_252007	gene	62499007	62503467	-	start	1112	PeakInsideFeature	1	0.343	ENSMUSG00000038422.2	ENSMUSG00000038422.2	Hdhd3	KNOWN	protein_coding
chr12	51831892	51831941	chr12	51830207	51830221	Rxra_MA0512.2	4.17984	+	chr12	51828616	51830850	peak_77576	gene	51743721	51829536	-	start	197	OverlapStart	0.412	0.011	ENSMUSG00000035247.15	ENSMUSG00000035247.15	Hectd1	KNOWN	protein_coding
chr9	37370353	37370402	chr9	37368607	37368621	Rxra_MA0512.2	9.54331	+	chr9	37366705	37369424	peak_359686	gene	37367367	37386572	+	start	697	OverlapStart	0.757	0.107	ENSMUSG00000046240.7	ENSMUSG00000046240.7	Hepacam	KNOWN	protein_coding
chr11	69118707	69118756	chr11	69123505	69123519	Rxra_MA0512.2	2.68911	-	chr11	69122292	69125869	peak_59389	gene	69120403	69124055	+	end	25	OverlapEnd	0.493	0.483	ENSMUSG00000023781.2	ENSMUSG00000023781.2	Hes7	KNOWN	protein_coding
chr11	69118707	69118756	chr11	69124383	69124397	Rxra_MA0512.2	2.76897	-	chr11	69122292	69125869	peak_59389	gene	69120403	69124055	+	end	25	OverlapEnd	0.493	0.483	ENSMUSG00000023781.2	ENSMUSG00000023781.2	Hes7	KNOWN	protein_coding
chr9	59541982	59542031	chr9	59537851	59537865	Rxra_MA0512.2	2.61445	-	chr9	59537690	59538195	peak_364213	gene	59539666	59565105	+	start	1724	Upstream	0	0	ENSMUSG00000025232.7	ENSMUSG00000025232.7	Hexa	KNOWN	protein_coding
chr5	16549814	16549863	chr5	16553338	16553352	Rxra_MA0512.2	5.68104	+	chr5	16552498	16555300	peak_269553	gene	16553494	16620152	+	start	405	OverlapStart	0.645	0.027	ENSMUSG00000028864.7	ENSMUSG00000028864.7	Hgf	KNOWN	protein_coding
chr1	192771952	192772001	chr1	192770873	192770887	Rxra_MA0512.2	5.45003	-	chr1	192769983	192771634	peak_28133	gene	192496710	192771223	-	start	415	OverlapStart	0.751	0.004	ENSMUSG00000037375.16	ENSMUSG00000037375.16	Hhat	KNOWN	protein_coding
chr1	192771952	192772001	chr1	192771077	192771091	Rxra_MA0512.2	3.99922	+	chr1	192769983	192771634	peak_28133	gene	192496710	192771223	-	start	415	OverlapStart	0.751	0.004	ENSMUSG00000037375.16	ENSMUSG00000037375.16	Hhat	KNOWN	protein_coding
chr2	104497481	104497530	chr2	104493125	104493139	Rxra_MA0512.2	4.51585	+	chr2	104493008	104495073	peak_208948	gene	104426480	104494446	-	start	406	OverlapStart	0.696	0.021	ENSMUSG00000027177.14	ENSMUSG00000027177.14	Hipk3	KNOWN	protein_coding
chr7	27536121	27536170	chr7	27526539	27526553	Rxra_MA0512.2	3.69182	+	chr7	27525392	27527196	peak_316616	gene	27523266	27531175	+	center	926	PeakInsideFeature	1	0.228	ENSMUSG00000040424.15	ENSMUSG00000040424.15	Hipk4	KNOWN	protein_coding
chr13	96675383	96675432	chr13	96671267	96671281	Rxra_MA0512.2	2.85955	+	chr13	96670440	96671599	peak_102876	gene	96648966	96670936	-	start	83	OverlapStart	0.428	0.023	ENSMUSG00000021670.14	ENSMUSG00000021670.14	Hmgcr	KNOWN	protein_coding
chr3	98277364	98277413	chr3	98280329	98280343	Rxra_MA0512.2	4.21601	-	chr3	98279786	98281531	peak_235010	gene	98280434	98310738	+	start	224	OverlapStart	0.629	0.036	ENSMUSG00000027875.12	ENSMUSG00000027875.12	Hmgcs2	KNOWN	protein_coding
chr3	98280116	98280165	chr3	98280329	98280343	Rxra_MA0512.2	4.21601	-	chr3	98279786	98281531	peak_235010	gene	98280434	98310738	+	start	224	OverlapStart	0.629	0.036	ENSMUSG00000027875.12	ENSMUSG00000027875.12	Hmgcs2	KNOWN	protein_coding
chr12	17689049	17689098	chr12	17690457	17690471	Rxra_MA0512.2	5.60891	+	chr12	17690157	17691205	peak_73319	gene	17690813	17791926	+	start	132	OverlapStart	0.374	0.003	ENSMUSG00000071379.1	ENSMUSG00000071379.1	Hpcal1	KNOWN	protein_coding
chr12	17692221	17692270	chr12	17690457	17690471	Rxra_MA0512.2	5.60891	+	chr12	17690157	17691205	peak_73319	gene	17690813	17791926	+	start	132	OverlapStart	0.374	0.003	ENSMUSG00000071379.1	ENSMUSG00000071379.1	Hpcal1	KNOWN	protein_coding
chr12	17740759	17740808	chr12	17741681	17741695	Rxra_MA0512.2	6.25514	-	chr12	17741537	17742320	peak_73334	gene	17690813	17791926	+	center	559	PeakInsideFeature	1	0.007	ENSMUSG00000071379.1	ENSMUSG00000071379.1	Hpcal1	KNOWN	protein_coding
chr4	116822689	116822784	chr4	116821744	116821758	Rxra_MA0512.2	2.86452	-	chr4	116820831	116822297	peak_259408	gene	116819903	116821707	-	start	143	OverlapStart	0.598	0.486	ENSMUSG00000043155.4	ENSMUSG00000043155.4	Hpdl	KNOWN	protein_coding
chr6	65143028	65143077	chr6	65144818	65144832	Rxra_MA0512.2	7.68878	+	chr6	65142332	65145459	peak_300816	gene	65117292	65144908	-	start	1013	OverlapStart	0.824	0.093	ENSMUSG00000029919.5	ENSMUSG00000029919.5	Hpgds	KNOWN	protein_coding
chr6	65145227	65145276	chr6	65144818	65144832	Rxra_MA0512.2	7.68878	+	chr6	65142332	65145459	peak_300816	gene	65117292	65144908	-	start	1013	OverlapStart	0.824	0.093	ENSMUSG00000029919.5	ENSMUSG00000029919.5	Hpgds	KNOWN	protein_coding
chrX	52992284	52992333	chrX	52988739	52988753	Rxra_MA0512.2	4.80436	-	chrX	52987724	52988918	peak_379089	gene	52988136	53021659	+	start	185	OverlapStart	0.655	0.023	ENSMUSG00000025630.8	ENSMUSG00000025630.8	Hprt	KNOWN	protein_coding
chr5	112337133	112337236	chr5	112344570	112344584	Rxra_MA0512.2	3.43445	-	chr5	112341349	112345541	peak_283633	gene	112343082	112378414	+	start	363	OverlapStart	0.587	0.07	ENSMUSG00000042328.13	ENSMUSG00000042328.13	Hps4	KNOWN	protein_coding
chr1	169962717	169962766	chr1	169969180	169969194	Rxra_MA0512.2	5.1205	-	chr1	169968858	169969720	peak_23643	gene	169949534	169969241	-	start	48	OverlapStart	0.444	0.019	ENSMUSG00000026675.12	ENSMUSG00000026675.12	Hsd17b7	KNOWN	protein_coding
chr1	169968261	169968310	chr1	169969180	169969194	Rxra_MA0512.2	5.1205	-	chr1	169968858	169969720	peak_23643	gene	169949534	169969241	-	start	48	OverlapStart	0.444	0.019	ENSMUSG00000026675.12	ENSMUSG00000026675.12	Hsd17b7	KNOWN	protein_coding
chr7	127796584	127796643	chr7	127800901	127800915	Rxra_MA0512.2	8.3175	+	chr7	127800240	127801553	peak_331873	gene	127800603	127803802	+	start	293	OverlapStart	0.724	0.297	ENSMUSG00000042289.11	ENSMUSG00000042289.11	Hsd3b7	KNOWN	protein_coding
chr4	59583299	59583368	chr4	59581796	59581810	Rxra_MA0512.2	5.22586	+	chr4	59580603	59582077	peak_251757	gene	59581562	59618689	+	start	222	OverlapStart	0.349	0.014	ENSMUSG00000028383.17	ENSMUSG00000028383.17	Hsdl2	KNOWN	protein_coding
chr5	116407104	116407153	chr5	116408180	116408194	Rxra_MA0512.2	7.91346	-	chr5	116406682	116411214	peak_284673	gene	116408490	116422864	-	end	458	OverlapEnd	0.601	0.19	ENSMUSG00000041548.4	ENSMUSG00000041548.4	Hspb8	KNOWN	protein_coding
chr2	152735720	152735769	chr2	152739620	152739634	Rxra_MA0512.2	3.38951	+	chr2	152739120	152739945	peak_216828	gene	152736250	152737410	+	end	2122	Downstream	0	0	ENSMUSG00000042745.9	ENSMUSG00000042745.9	Id1	KNOWN	protein_coding
chr2	130274866	130274915	chr2	130284577	130284591	Rxra_MA0512.2	5.86738	+	chr2	130283720	130284888	peak_212964	gene	130279308	130284547	-	start	243	OverlapStart	0.708	0.158	ENSMUSG00000027406.12	ENSMUSG00000027406.12	Idh3b	KNOWN	protein_coding
chr6	125147203	125147252	chr6	125145137	125145151	Rxra_MA0512.2	12.9766	-	chr6	125144921	125147574	peak_310643	gene	125145240	125161782	+	start	1007	OverlapStart	0.88	0.141	ENSMUSG00000038271.17	ENSMUSG00000038271.17	Iffo1	KNOWN	protein_coding
chr6	125147203	125147252	chr6	125157200	125157214	Rxra_MA0512.2	6.34061	-	chr6	125156755	125157619	peak_310647	gene	125145240	125161782	+	center	3676	PeakInsideFeature	1	0.052	ENSMUSG00000038271.17	ENSMUSG00000038271.17	Iffo1	KNOWN	protein_coding
chr6	125147203	125147252	chr6	125157250	125157264	Rxra_MA0512.2	2.67368	-	chr6	125156755	125157619	peak_310647	gene	125145240	125161782	+	center	3676	PeakInsideFeature	1	0.052	ENSMUSG00000038271.17	ENSMUSG00000038271.17	Iffo1	KNOWN	protein_coding
chr4	139535254	139535303	chr4	139535229	139535243	Rxra_MA0512.2	7.00388	-	chr4	139534613	139536357	peak_264507	gene	139530547	139620382	+	start	4938	PeakInsideFeature	1	0.019	ENSMUSG00000041025.15	ENSMUSG00000041025.15	Iffo2	KNOWN	protein_coding
chr4	139535254	139535303	chr4	139535309	139535323	Rxra_MA0512.2	3.35272	+	chr4	139534613	139536357	peak_264507	gene	139530547	139620382	+	start	4938	PeakInsideFeature	1	0.019	ENSMUSG00000041025.15	ENSMUSG00000041025.15	Iffo2	KNOWN	protein_coding
chr4	139624460	139624509	chr4	139616822	139616836	Rxra_MA0512.2	2.97094	-	chr4	139616131	139617285	peak_264529	gene	139530547	139620382	+	end	3674	PeakInsideFeature	1	0.013	ENSMUSG00000041025.15	ENSMUSG00000041025.15	Iffo2	KNOWN	protein_coding
chr7	140954229	140954278	chr7	140959405	140959419	Rxra_MA0512.2	6.5962	-	chr7	140959106	140959924	peak_334429	gene	140954836	140955987	-	start	3528	Upstream	0	0	ENSMUSG00000060591.9	ENSMUSG00000060591.9	Ifitm2	KNOWN	protein_coding
chr10	19591502	19591551	chr10	19591875	19591889	Rxra_MA0512.2	3.7993	-	chr10	19591283	19592333	peak_31327	gene	19591948	19610229	+	start	140	OverlapStart	0.367	0.021	ENSMUSG00000020009.12	ENSMUSG00000020009.12	Ifngr1	KNOWN	protein_coding
chr6	115850627	115850676	chr6	115853066	115853080	Rxra_MA0512.2	4.27195	+	chr6	115852969	115853973	peak_308896	gene	115853469	115926699	+	start	2	OverlapStart	0.502	0.006	ENSMUSG00000030323.13	ENSMUSG00000030323.13	Ift122	KNOWN	protein_coding
chr15	78165749	78165798	chr15	78158457	78158471	Rxra_MA0512.2	2.96918	-	chr15	78156832	78159220	peak_135028	gene	78159464	78174108	-	end	1438	Downstream	0	0	ENSMUSG00000016637.6	ENSMUSG00000016637.6	Ift27	KNOWN	protein_coding
chr15	78165749	78165798	chr15	78158475	78158489	Rxra_MA0512.2	3.53124	-	chr15	78156832	78159220	peak_135028	gene	78159464	78174108	-	end	1438	Downstream	0	0	ENSMUSG00000016637.6	ENSMUSG00000016637.6	Ift27	KNOWN	protein_coding
chrX	100490949	100490998	chrX	100494315	100494329	Rxra_MA0512.2	6.72729	-	chrX	100493625	100494824	peak_381323	gene	100494290	100516125	+	start	66	OverlapStart	0.445	0.024	ENSMUSG00000031221.7	ENSMUSG00000031221.7	Igbp1	KNOWN	protein_coding
chrX	100503900	100504002	chrX	100494315	100494329	Rxra_MA0512.2	6.72729	-	chrX	100493625	100494824	peak_381323	gene	100494290	100516125	+	start	66	OverlapStart	0.445	0.024	ENSMUSG00000031221.7	ENSMUSG00000031221.7	Igbp1	KNOWN	protein_coding
chr9	65135416	65135465	chr9	65140985	65140999	Rxra_MA0512.2	3.55567	+	chr9	65140674	65142670	peak_365640	gene	65141153	65185857	+	start	519	OverlapStart	0.76	0.034	ENSMUSG00000032394.5	ENSMUSG00000032394.5	Igdcc3	KNOWN	protein_coding
chr9	65137710	65137759	chr9	65140985	65140999	Rxra_MA0512.2	3.55567	+	chr9	65140674	65142670	peak_365640	gene	65141153	65185857	+	start	519	OverlapStart	0.76	0.034	ENSMUSG00000032394.5	ENSMUSG00000032394.5	Igdcc3	KNOWN	protein_coding
chr1	131275013	131275062	chr1	131270471	131270485	Rxra_MA0512.2	9.38345	+	chr1	131269726	131270844	peak_16986	gene	131254342	131279606	-	center	3311	PeakInsideFeature	1	0.044	ENSMUSG00000042349.13	ENSMUSG00000042349.13	Ikbke	KNOWN	protein_coding
chr8	82404715	82404764	chr8	82403126	82403140	Rxra_MA0512.2	3.94852	+	chr8	82401157	82403525	peak_346372	gene	82331631	82403222	-	start	881	OverlapStart	0.872	0.029	ENSMUSG00000031712.9	ENSMUSG00000031712.9	Il15	KNOWN	protein_coding
chr8	82404715	82404764	chr8	82403275	82403289	Rxra_MA0512.2	6.21861	-	chr8	82401157	82403525	peak_346372	gene	82331631	82403222	-	start	881	OverlapStart	0.872	0.029	ENSMUSG00000031712.9	ENSMUSG00000031712.9	Il15	KNOWN	protein_coding
chr3	89868570	89868619	chr3	89863985	89863999	Rxra_MA0512.2	6.77042	+	chr3	89863592	89864513	peak_233706	gene	89864058	89913196	-	end	6	OverlapEnd	0.494	0.009	ENSMUSG00000027947.11	ENSMUSG00000027947.11	Il6ra	KNOWN	protein_coding
chr10	78571665	78571714	chr10	78574655	78574669	Rxra_MA0512.2	11.2939	+	chr10	78574105	78576018	peak_40116	gene	78574499	78584498	+	start	562	OverlapStart	0.794	0.152	ENSMUSG00000032763.10	ENSMUSG00000032763.10	Ilvbl	KNOWN	protein_coding
chr7	16273376	16273425	chr7	16274030	16274044	Rxra_MA0512.2	7.56497	+	chr7	16272640	16274162	peak_315564	gene	16272012	16273617	-	start	216	OverlapStart	0.642	0.609	ENSMUSG00000091811.2	ENSMUSG00000091811.2	Inafm1	KNOWN	protein_coding
chr7	16275555	16275675	chr7	16274030	16274044	Rxra_MA0512.2	7.56497	+	chr7	16272640	16274162	peak_315564	gene	16272012	16273617	-	start	216	OverlapStart	0.642	0.609	ENSMUSG00000091811.2	ENSMUSG00000091811.2	Inafm1	KNOWN	protein_coding
chr1	93806204	93806253	chr1	93804545	93804559	Rxra_MA0512.2	12.4389	-	chr1	93803538	93804587	peak_13486	gene	93803964	93822101	+	start	98	OverlapStart	0.594	0.034	ENSMUSG00000026283.13	ENSMUSG00000026283.13	Ing5	KNOWN	protein_coding
chr1	93813978	93814027	chr1	93804545	93804559	Rxra_MA0512.2	12.4389	-	chr1	93803538	93804587	peak_13486	gene	93803964	93822101	+	start	98	OverlapStart	0.594	0.034	ENSMUSG00000026283.13	ENSMUSG00000026283.13	Ing5	KNOWN	protein_coding
chr14	64998141	64998190	chr14	64997709	64997723	Rxra_MA0512.2	5.95331	+	chr14	64997118	64998940	peak_117373	gene	64950044	65039835	+	center	3090	PeakInsideFeature	1	0.02	ENSMUSG00000021975.7	ENSMUSG00000021975.7	Ints9	KNOWN	protein_coding
chr7	110018072	110018121	chr7	110018138	110018152	Rxra_MA0512.2	3.40892	-	chr7	110017965	110019153	peak_328258	gene	110018273	110056609	+	start	286	OverlapStart	0.741	0.023	ENSMUSG00000066232.4	ENSMUSG00000066232.4	Ipo7	KNOWN	protein_coding
chr4	129625769	129625818	chr4	129618750	129618764	Rxra_MA0512.2	5.68777	-	chr4	129618480	129619553	peak_261978	gene	129615125	129619099	-	start	83	OverlapStart	0.577	0.156	ENSMUSG00000040795.12	ENSMUSG00000040795.12	Iqcc	KNOWN	protein_coding
chr7	4860793	4860847	chr7	4866107	4866121	Rxra_MA0512.2	6.20753	-	chr7	4865182	4866792	peak_315056	gene	4844958	4870258	-	start	4271	PeakInsideFeature	1	0.064	ENSMUSG00000052605.12	ENSMUSG00000052605.12	Isoc2b	KNOWN	protein_coding
chr8	70598500	70598549	chr8	70593432	70593446	Rxra_MA0512.2	5.60667	-	chr8	70592991	70595005	peak_344593	gene	70594372	70597290	+	start	374	OverlapStart	0.314	0.217	ENSMUSG00000019139.10	ENSMUSG00000019139.10	Isyna1	KNOWN	protein_coding
chr3	96646151	96646200	chr3	96645376	96645390	Rxra_MA0512.2	2.85533	+	chr3	96645073	96646660	peak_234647	gene	96645583	96664519	+	start	283	OverlapStart	0.679	0.057	ENSMUSG00000090210.7	ENSMUSG00000090210.7	Itga10	KNOWN	protein_coding
chr11	95056980	95057029	chr11	95047130	95047144	Rxra_MA0512.2	3.62008	-	chr11	95046911	95047580	peak_64773	gene	95044473	95076801	-	end	2772	PeakInsideFeature	1	0.021	ENSMUSG00000001507.16	ENSMUSG00000001507.16	Itga3	KNOWN	protein_coding
chr2	71800378	71800427	chr2	71801788	71801802	Rxra_MA0512.2	6.40056	+	chr2	71800598	71803077	peak_204383	gene	71745615	71858416	+	center	178	PeakInsideFeature	1	0.022	ENSMUSG00000027111.15	ENSMUSG00000027111.15	Itga6	KNOWN	protein_coding
chr2	71804113	71804162	chr2	71801788	71801802	Rxra_MA0512.2	6.40056	+	chr2	71800598	71803077	peak_204383	gene	71745615	71858416	+	center	178	PeakInsideFeature	1	0.022	ENSMUSG00000027111.15	ENSMUSG00000027111.15	Itga6	KNOWN	protein_coding
chr11	116014612	116014742	chr11	116005510	116005524	Rxra_MA0512.2	4.13022	-	chr11	116004139	116005843	peak_69363	gene	115974708	116008412	+	end	3421	PeakInsideFeature	1	0.051	ENSMUSG00000020758.15	ENSMUSG00000020758.15	Itgb4	KNOWN	protein_coding
chr14	73375104	73375153	chr14	73374509	73374523	Rxra_MA0512.2	3.82798	+	chr14	73373665	73376275	peak_118897	gene	73362230	73385271	-	center	1220	PeakInsideFeature	1	0.113	ENSMUSG00000022108.7	ENSMUSG00000022108.7	Itm2b	KNOWN	protein_coding
chr14	73375104	73375153	chr14	73381882	73381896	Rxra_MA0512.2	3.44382	-	chr14	73381625	73381902	peak_118901	gene	73362230	73385271	-	start	3508	PeakInsideFeature	1	0.012	ENSMUSG00000022108.7	ENSMUSG00000022108.7	Itm2b	KNOWN	protein_coding
chr14	73380894	73380943	chr14	73374509	73374523	Rxra_MA0512.2	3.82798	+	chr14	73373665	73376275	peak_118897	gene	73362230	73385271	-	center	1220	PeakInsideFeature	1	0.113	ENSMUSG00000022108.7	ENSMUSG00000022108.7	Itm2b	KNOWN	protein_coding
chr14	73380894	73380943	chr14	73381882	73381896	Rxra_MA0512.2	3.44382	-	chr14	73381625	73381902	peak_118901	gene	73362230	73385271	-	start	3508	PeakInsideFeature	1	0.012	ENSMUSG00000022108.7	ENSMUSG00000022108.7	Itm2b	KNOWN	protein_coding
chr1	180437042	180437091	chr1	180428017	180428031	Rxra_MA0512.2	3.83503	+	chr1	180427572	180429191	peak_25654	gene	180330484	180424802	+	end	3579	Downstream	0	0	ENSMUSG00000038855.10	ENSMUSG00000038855.10	Itpkb	KNOWN	protein_coding
chr18	32063488	32063537	chr18	32067388	32067402	Rxra_MA0512.2	6.73077	-	chr18	32067220	32068520	peak_173542	gene	32067733	32104331	+	start	137	OverlapStart	0.605	0.022	ENSMUSG00000024384.3	ENSMUSG00000024384.3	Iws1	KNOWN	protein_coding
chr11	51860083	51860132	chr11	51855359	51855373	Rxra_MA0512.2	4.4568	+	chr11	51855060	51859219	peak_55856	gene	51813454	51857653	-	start	514	OverlapStart	0.623	0.059	ENSMUSG00000020387.15	ENSMUSG00000020387.15	Jade2	KNOWN	protein_coding
chr12	72104770	72104819	chr12	72104665	72104679	Rxra_MA0512.2	3.92161	+	chr12	72103750	72105490	peak_80116	gene	72085588	72101461	+	end	3159	Downstream	0	0	ENSMUSG00000005078.16	ENSMUSG00000005078.16	Jkamp	KNOWN	protein_coding
chr12	72104770	72104819	chr12	72104825	72104839	Rxra_MA0512.2	4.08172	+	chr12	72103750	72105490	peak_80116	gene	72085588	72101461	+	end	3159	Downstream	0	0	ENSMUSG00000005078.16	ENSMUSG00000005078.16	Jkamp	KNOWN	protein_coding
chr15	76000633	76000682	chr15	76009817	76009831	Rxra_MA0512.2	6.71802	-	chr15	76008374	76010623	peak_134507	gene	76009887	76046981	+	start	389	OverlapStart	0.327	0.02	ENSMUSG00000102018.7	ENSMUSG00000102018.7	K230010J24Rik	KNOWN	protein_coding
chr15	76018443	76018492	chr15	76009817	76009831	Rxra_MA0512.2	6.71802	-	chr15	76008374	76010623	peak_134507	gene	76009887	76046981	+	start	389	OverlapStart	0.327	0.02	ENSMUSG00000102018.7	ENSMUSG00000102018.7	K230010J24Rik	KNOWN	protein_coding
chr8	15037326	15037375	chr8	15036637	15036651	Rxra_MA0512.2	4.57251	-	chr8	15035333	15037904	peak_337558	gene	15011024	15033333	+	end	3285	Downstream	0	0	ENSMUSG00000055675.6	ENSMUSG00000055675.6	Kbtbd11	KNOWN	protein_coding
chr8	15038948	15039001	chr8	15036637	15036651	Rxra_MA0512.2	4.57251	-	chr8	15035333	15037904	peak_337558	gene	15011024	15033333	+	end	3285	Downstream	0	0	ENSMUSG00000055675.6	ENSMUSG00000055675.6	Kbtbd11	KNOWN	protein_coding
chr17	87770369	87770418	chr17	87770893	87770907	Rxra_MA0512.2	2.91501	-	chr17	87770736	87771288	peak_168973	gene	87745836	87797994	-	center	903	PeakInsideFeature	1	0.011	ENSMUSG00000050138.7	ENSMUSG00000050138.7	Kcnk12	KNOWN	protein_coding
chr5	114369129	114369178	chr5	114370250	114370264	Rxra_MA0512.2	5.54023	+	chr5	114370053	114371297	peak_284196	gene	114363566	114380508	-	center	1362	PeakInsideFeature	1	0.073	ENSMUSG00000001098.15	ENSMUSG00000001098.15	Kctd10	KNOWN	protein_coding
chr15	78433522	78433571	chr15	78435192	78435206	Rxra_MA0512.2	3.09601	+	chr15	78434686	78438332	peak_135093	gene	78428563	78438909	+	end	2400	PeakInsideFeature	1	0.352	ENSMUSG00000033287.15	ENSMUSG00000033287.15	Kctd17	KNOWN	protein_coding
chr7	45873120	45873169	chr7	45872612	45872626	Rxra_MA0512.2	5.08609	+	chr7	45872502	45873816	peak_318882	gene	45872771	45883732	+	start	388	OverlapStart	0.795	0.095	ENSMUSG00000002778.14	ENSMUSG00000002778.14	Kdelr1	KNOWN	protein_coding
chr7	45873120	45873169	chr7	45873214	45873228	Rxra_MA0512.2	3.4668	+	chr7	45872502	45873816	peak_318882	gene	45872771	45883732	+	start	388	OverlapStart	0.795	0.095	ENSMUSG00000002778.14	ENSMUSG00000002778.14	Kdelr1	KNOWN	protein_coding
chr7	45878238	45878287	chr7	45872612	45872626	Rxra_MA0512.2	5.08609	+	chr7	45872502	45873816	peak_318882	gene	45872771	45883732	+	start	388	OverlapStart	0.795	0.095	ENSMUSG00000002778.14	ENSMUSG00000002778.14	Kdelr1	KNOWN	protein_coding
chr7	45878238	45878287	chr7	45873214	45873228	Rxra_MA0512.2	3.4668	+	chr7	45872502	45873816	peak_318882	gene	45872771	45883732	+	start	388	OverlapStart	0.795	0.095	ENSMUSG00000002778.14	ENSMUSG00000002778.14	Kdelr1	KNOWN	protein_coding
chr4	118141193	118141242	chr4	118138077	118138091	Rxra_MA0512.2	9.53954	+	chr4	118137741	118138184	peak_259709	gene	118136956	118180043	-	end	1006	PeakInsideFeature	1	0.01	ENSMUSG00000033326.15	ENSMUSG00000033326.15	Kdm4a	KNOWN	protein_coding
chr6	39208275	39208350	chr6	39207290	39207304	Rxra_MA0512.2	2.76578	+	chr6	39205099	39207585	peak_297309	gene	39136622	39206789	-	start	447	OverlapStart	0.68	0.024	ENSMUSG00000042599.8	ENSMUSG00000042599.8	Kdm7a	KNOWN	protein_coding
chr6	39211419	39211468	chr6	39207290	39207304	Rxra_MA0512.2	2.76578	+	chr6	39205099	39207585	peak_297309	gene	39136622	39206789	-	start	447	OverlapStart	0.68	0.024	ENSMUSG00000042599.8	ENSMUSG00000042599.8	Kdm7a	KNOWN	protein_coding
chr5	30929891	30929940	chr5	30921128	30921142	Rxra_MA0512.2	12.1712	-	chr5	30920658	30922214	peak_272092	gene	30921430	30931248	+	start	6	OverlapStart	0.504	0.08	ENSMUSG00000029162.15	ENSMUSG00000029162.15	Khk	KNOWN	protein_coding
chr14	55882781	55882830	chr14	55885850	55885864	Rxra_MA0512.2	3.13428	+	chr14	55884275	55886436	peak_115544	gene	55884968	55896781	+	start	387	OverlapStart	0.679	0.124	ENSMUSG00000047153.3	ENSMUSG00000047153.3	Khnyn	KNOWN	protein_coding
chr9	61954176	61954227	chr9	61947961	61947975	Rxra_MA0512.2	3.06094	-	chr9	61946154	61948347	peak_364833	gene	61917279	61946799	-	start	451	OverlapStart	0.294	0.022	ENSMUSG00000032254.9	ENSMUSG00000032254.9	Kif23	KNOWN	protein_coding
chr12	24660199	24660248	chr12	24652079	24652093	Rxra_MA0512.2	3.15668	+	chr12	24650711	24652387	peak_73703	gene	24651370	24662774	+	start	179	OverlapStart	0.607	0.089	ENSMUSG00000020653.11	ENSMUSG00000020653.11	Klf11	KNOWN	protein_coding
chr7	63920830	63920879	chr7	63914239	63914253	Rxra_MA0512.2	3.01613	+	chr7	63913887	63914360	peak_320837	gene	63886350	63938915	-	center	1491	PeakInsideFeature	1	0.008	ENSMUSG00000052040.10	ENSMUSG00000052040.10	Klf13	KNOWN	protein_coding
chr6	147116294	147116343	chr6	147116658	147116672	Rxra_MA0512.2	2.64094	-	chr6	147115951	147117234	peak_314337	gene	147091378	147112778	+	end	3814	Downstream	0	0	ENSMUSG00000040102.10	ENSMUSG00000040102.10	Klhl42	KNOWN	protein_coding
chr7	43789995	43790044	chr7	43782570	43782584	Rxra_MA0512.2	3.52745	-	chr7	43782368	43783146	peak_318479	gene	43781034	43785410	+	center	465	PeakInsideFeature	1	0.178	ENSMUSG00000030693.10	ENSMUSG00000030693.10	Klk10	KNOWN	protein_coding
chr5	124443685	124443734	chr5	124440251	124440265	Rxra_MA0512.2	4.50677	+	chr5	124439382	124440513	peak_286618	gene	124439929	124462308	+	start	18	OverlapStart	0.516	0.026	ENSMUSG00000049327.17	ENSMUSG00000049327.17	Kmt5a	KNOWN	protein_coding
chr7	16127735	16127784	chr7	16120368	16120382	Rxra_MA0512.2	6.81505	+	chr7	16119485	16120557	peak_315520	gene	16119894	16127516	+	start	127	OverlapStart	0.618	0.087	ENSMUSG00000006021.5	ENSMUSG00000006021.5	Kptn	KNOWN	protein_coding
chr11	99376964	99377013	chr11	99385926	99385940	Rxra_MA0512.2	5.31895	-	chr11	99385675	99387039	peak_65770	gene	99385253	99389364	-	center	951	PeakInsideFeature	1	0.332	ENSMUSG00000019761.10	ENSMUSG00000019761.10	Krt10	KNOWN	protein_coding
chr10	42482944	42483020	chr10	42476921	42476935	Rxra_MA0512.2	4.76006	+	chr10	42476811	42479006	peak_34713	gene	42312584	42478565	-	start	657	OverlapStart	0.799	0.011	ENSMUSG00000038302.14	ENSMUSG00000038302.14	Lace1	KNOWN	protein_coding
chr10	42482944	42483020	chr10	42478054	42478068	Rxra_MA0512.2	7.78086	-	chr10	42476811	42479006	peak_34713	gene	42312584	42478565	-	start	657	OverlapStart	0.799	0.011	ENSMUSG00000038302.14	ENSMUSG00000038302.14	Lace1	KNOWN	protein_coding
chr9	66975214	66975263	chr9	66974934	66974948	Rxra_MA0512.2	3.67817	-	chr9	66974704	66975728	peak_366099	gene	66955392	66975484	-	start	268	OverlapStart	0.762	0.039	ENSMUSG00000032370.7	ENSMUSG00000032370.7	Lactb	KNOWN	protein_coding
chrX	38451808	38451857	chrX	38456183	38456197	Rxra_MA0512.2	4.57734	-	chrX	38455688	38457021	peak_378354	gene	38401356	38456454	-	start	100	OverlapStart	0.575	0.014	ENSMUSG00000016534.15	ENSMUSG00000016534.15	Lamp2	KNOWN	protein_coding
chr5	45507918	45507967	chr5	45498264	45498278	Rxra_MA0512.2	5.86141	-	chr5	45497571	45499156	peak_274751	gene	45493373	45512691	+	center	4669	PeakInsideFeature	1	0.082	ENSMUSG00000039682.12	ENSMUSG00000039682.12	Lap3	KNOWN	protein_coding
chr11	97819152	97819201	chr11	97821039	97821053	Rxra_MA0512.2	3.32763	+	chr11	97817396	97821646	peak_65423	gene	97798999	97838764	+	center	640	PeakInsideFeature	1	0.107	ENSMUSG00000038366.15	ENSMUSG00000038366.15	Lasp1	KNOWN	protein_coding
chr11	97822879	97822928	chr11	97821039	97821053	Rxra_MA0512.2	3.32763	+	chr11	97817396	97821646	peak_65423	gene	97798999	97838764	+	center	640	PeakInsideFeature	1	0.107	ENSMUSG00000038366.15	ENSMUSG00000038366.15	Lasp1	KNOWN	protein_coding
chr5	134625494	134625543	chr5	134617285	134617299	Rxra_MA0512.2	4.5356	-	chr5	134616957	134617464	peak_288578	gene	134600021	134615025	-	start	2185	Upstream	0	0	ENSMUSG00000040751.12	ENSMUSG00000040751.12	Lat2	KNOWN	protein_coding
chr17	73106279	73106387	chr17	73107682	73107696	Rxra_MA0512.2	2.82615	-	chr17	73107318	73108480	peak_166312	gene	73107984	73243368	+	start	85	OverlapStart	0.427	0.003	ENSMUSG00000054469.13	ENSMUSG00000054469.13	Lclat1	KNOWN	protein_coding
chr14	75183764	75183841	chr14	75176573	75176587	Rxra_MA0512.2	2.98765	-	chr14	75176446	75177072	peak_119217	gene	75131100	75230842	+	center	4212	PeakInsideFeature	1	0.006	ENSMUSG00000021998.16	ENSMUSG00000021998.16	Lcp1	KNOWN	protein_coding
chr14	75183764	75183841	chr14	75179025	75179039	Rxra_MA0512.2	6.22797	+	chr14	75178364	75181927	peak_119218	gene	75131100	75230842	+	center	826	PeakInsideFeature	1	0.036	ENSMUSG00000021998.16	ENSMUSG00000021998.16	Lcp1	KNOWN	protein_coding
chr7	132711433	132711482	chr7	132704484	132704498	Rxra_MA0512.2	4.4348	+	chr7	132703998	132705867	peak_332872	gene	132610637	132706420	+	end	1488	PeakInsideFeature	1	0.02	ENSMUSG00000030946.13	ENSMUSG00000030946.13	Lhpp	KNOWN	protein_coding
chr13	55369072	55369121	chr13	55363214	55363228	Rxra_MA0512.2	3.64782	-	chr13	55362243	55363243	peak_97265	gene	55343832	55362783	-	start	40	OverlapStart	0.54	0.028	ENSMUSG00000021484.7	ENSMUSG00000021484.7	Lman2	KNOWN	protein_coding
chr1	135373579	135373681	chr1	135368203	135368217	Rxra_MA0512.2	4.18155	-	chr1	135368121	135369512	peak_18073	gene	135324806	135368065	+	end	751	Downstream	0	0	ENSMUSG00000048096.7	ENSMUSG00000048096.7	Lmod1	KNOWN	protein_coding
chr17	56624062	56624148	chr17	56627047	56627061	Rxra_MA0512.2	4.32789	+	chr17	56626481	56628102	peak_163939	gene	56614300	56626903	-	start	388	OverlapStart	0.26	0.033	ENSMUSG00000041168.9	ENSMUSG00000041168.9	Lonp1	KNOWN	protein_coding
chr17	56624062	56624148	chr17	56627268	56627282	Rxra_MA0512.2	9.57098	+	chr17	56626481	56628102	peak_163939	gene	56614300	56626903	-	start	388	OverlapStart	0.26	0.033	ENSMUSG00000041168.9	ENSMUSG00000041168.9	Lonp1	KNOWN	protein_coding
chr14	73239392	73239441	chr14	73234689	73234703	Rxra_MA0512.2	2.94212	-	chr14	73234447	73235098	peak_118859	gene	73237894	73243294	+	start	3122	Upstream	0	0	ENSMUSG00000033446.7	ENSMUSG00000033446.7	Lpar6	KNOWN	protein_coding
chr6	124662624	124662673	chr6	124663548	124663562	Rxra_MA0512.2	3.10158	-	chr6	124662397	124663668	peak_310523	gene	124663026	124704418	+	start	6	OverlapStart	0.505	0.016	ENSMUSG00000004270.13	ENSMUSG00000004270.13	Lpcat3	KNOWN	protein_coding
chr10	127623112	127623205	chr10	127622150	127622164	Rxra_MA0512.2	7.0735	-	chr10	127620892	127622516	peak_48092	gene	127538160	127621148	-	start	556	OverlapStart	0.158	0.003	ENSMUSG00000040249.15	ENSMUSG00000040249.15	Lrp1	KNOWN	protein_coding
chr7	67642261	67642310	chr7	67644935	67644949	Rxra_MA0512.2	4.46804	+	chr7	67644853	67645841	peak_321744	gene	67513409	67645268	-	start	79	OverlapStart	0.42	0.003	ENSMUSG00000030556.13	ENSMUSG00000030556.13	Lrrc28	KNOWN	protein_coding
chr7	67642261	67642310	chr7	67645146	67645160	Rxra_MA0512.2	3.28586	-	chr7	67644853	67645841	peak_321744	gene	67513409	67645268	-	start	79	OverlapStart	0.42	0.003	ENSMUSG00000030556.13	ENSMUSG00000030556.13	Lrrc28	KNOWN	protein_coding
chr7	67642803	67642852	chr7	67644935	67644949	Rxra_MA0512.2	4.46804	+	chr7	67644853	67645841	peak_321744	gene	67513409	67645268	-	start	79	OverlapStart	0.42	0.003	ENSMUSG00000030556.13	ENSMUSG00000030556.13	Lrrc28	KNOWN	protein_coding
chr7	67642803	67642852	chr7	67645146	67645160	Rxra_MA0512.2	3.28586	-	chr7	67644853	67645841	peak_321744	gene	67513409	67645268	-	start	79	OverlapStart	0.42	0.003	ENSMUSG00000030556.13	ENSMUSG00000030556.13	Lrrc28	KNOWN	protein_coding
chr4	154013594	154013643	chr4	154011431	154011445	Rxra_MA0512.2	2.82422	-	chr4	154011308	154012782	peak_267444	gene	154011730	154021513	+	start	315	OverlapStart	0.714	0.108	ENSMUSG00000029028.14	ENSMUSG00000029028.14	Lrrc47	KNOWN	protein_coding
chr2	96316118	96316229	chr2	96319315	96319329	Rxra_MA0512.2	3.23746	-	chr2	96316744	96320287	peak_207834	gene	96318168	97631666	+	start	347	OverlapStart	0.598	0.001	ENSMUSG00000050587.14	ENSMUSG00000050587.14	Lrrc4c	KNOWN	protein_coding
chr7	101927141	101927216	chr7	101934077	101934091	Rxra_MA0512.2	2.67238	+	chr7	101933440	101934386	peak_327412	gene	101912983	101933895	-	start	18	OverlapStart	0.481	0.022	ENSMUSG00000064307.13	ENSMUSG00000064307.13	Lrrc51	KNOWN	protein_coding
chr6	77243706	77243769	chr6	77242895	77242909	Rxra_MA0512.2	6.69919	-	chr6	77241619	77245209	peak_302054	gene	77242688	77257791	+	start	726	OverlapStart	0.702	0.167	ENSMUSG00000060780.2	ENSMUSG00000060780.2	Lrrtm1	KNOWN	protein_coding
chr13	37347084	37347133	chr13	37345152	37345166	Rxra_MA0512.2	6.11085	-	chr13	37344385	37348569	peak_93585	gene	37345344	37419036	+	start	1133	OverlapStart	0.771	0.044	ENSMUSG00000021423.5	ENSMUSG00000021423.5	Ly86	KNOWN	protein_coding
chr13	37347084	37347133	chr13	37348225	37348239	Rxra_MA0512.2	3.84141	+	chr13	37344385	37348569	peak_93585	gene	37345344	37419036	+	start	1133	OverlapStart	0.771	0.044	ENSMUSG00000021423.5	ENSMUSG00000021423.5	Ly86	KNOWN	protein_coding
chr8	84700791	84700840	chr8	84701360	84701374	Rxra_MA0512.2	3.58717	+	chr8	84701157	84701986	peak_346836	gene	84701456	84704715	+	start	115	OverlapStart	0.639	0.163	ENSMUSG00000034041.4	ENSMUSG00000034041.4	Lyl1	KNOWN	protein_coding
chr8	84700791	84700840	chr8	84706866	84706880	Rxra_MA0512.2	6.15673	-	chr8	84706642	84707928	peak_346838	gene	84701456	84704715	+	end	2570	Downstream	0	0	ENSMUSG00000034041.4	ENSMUSG00000034041.4	Lyl1	KNOWN	protein_coding
chr3	95139425	95139474	chr3	95134470	95134484	Rxra_MA0512.2	15.6923	+	chr3	95133424	95136026	peak_234296	gene	95134087	95139518	+	start	638	OverlapStart	0.745	0.357	ENSMUSG00000053769.5	ENSMUSG00000053769.5	Lysmd1	KNOWN	protein_coding
chr9	75622985	75623034	chr9	75630958	75630972	Rxra_MA0512.2	3.72104	+	chr9	75630685	75631559	peak_367873	gene	75625731	75637773	+	center	630	PeakInsideFeature	1	0.073	ENSMUSG00000032184.4	ENSMUSG00000032184.4	Lysmd2	KNOWN	protein_coding
chr9	75622985	75623034	chr9	75631309	75631323	Rxra_MA0512.2	3.2636	+	chr9	75630685	75631559	peak_367873	gene	75625731	75637773	+	center	630	PeakInsideFeature	1	0.073	ENSMUSG00000032184.4	ENSMUSG00000032184.4	Lysmd2	KNOWN	protein_coding
chr16	17507265	17507314	chr16	17509100	17509114	Rxra_MA0512.2	5.15076	-	chr16	17508225	17509658	peak_143404	gene	17508687	17526333	+	start	254	OverlapStart	0.678	0.055	ENSMUSG00000022761.10	ENSMUSG00000022761.10	Lztr1	KNOWN	protein_coding
chr16	17507265	17507314	chr16	17509145	17509159	Rxra_MA0512.2	3.47851	-	chr16	17508225	17509658	peak_143404	gene	17508687	17526333	+	start	254	OverlapStart	0.678	0.055	ENSMUSG00000022761.10	ENSMUSG00000022761.10	Lztr1	KNOWN	protein_coding
chr16	17518172	17518221	chr16	17509100	17509114	Rxra_MA0512.2	5.15076	-	chr16	17508225	17509658	peak_143404	gene	17508687	17526333	+	start	254	OverlapStart	0.678	0.055	ENSMUSG00000022761.10	ENSMUSG00000022761.10	Lztr1	KNOWN	protein_coding
chr16	17518172	17518221	chr16	17509145	17509159	Rxra_MA0512.2	3.47851	-	chr16	17508225	17509658	peak_143404	gene	17508687	17526333	+	start	254	OverlapStart	0.678	0.055	ENSMUSG00000022761.10	ENSMUSG00000022761.10	Lztr1	KNOWN	protein_coding
chr16	38342540	38342589	chr16	38341918	38341932	Rxra_MA0512.2	3.36973	+	chr16	38341364	38342185	peak_147553	gene	38297753	38342143	-	start	369	OverlapStart	0.949	0.018	ENSMUSG00000022805.16	ENSMUSG00000022805.16	Maats1	KNOWN	protein_coding
chr5	19229628	19229677	chr5	19227370	19227384	Rxra_MA0512.2	3.01903	-	chr5	19226156	19228513	peak_269797	gene	19227035	20704792	+	start	299	OverlapStart	0.627	0.001	ENSMUSG00000040003.18	ENSMUSG00000040003.18	Magi2	KNOWN	protein_coding
chr4	134633733	134633782	chr4	134632409	134632423	Rxra_MA0512.2	5.34545	-	chr4	134631467	134632879	peak_263176	gene	134561689	134704290	-	center	816	PeakInsideFeature	1	0.009	ENSMUSG00000037306.13	ENSMUSG00000037306.13	Man1c1	KNOWN	protein_coding
chr4	26345498	26345585	chr4	26346661	26346675	Rxra_MA0512.2	10.2105	+	chr4	26345834	26347201	peak_246973	gene	26324505	26346891	-	start	374	OverlapStart	0.773	0.047	ENSMUSG00000040520.7	ENSMUSG00000040520.7	Manea	KNOWN	protein_coding
chr10	81125348	81125397	chr10	81129298	81129312	Rxra_MA0512.2	6.49729	-	chr10	81127435	81130050	peak_40571	gene	81105914	81124697	+	end	4045	Downstream	0	0	ENSMUSG00000035027.17	ENSMUSG00000035027.17	Map2k2	KNOWN	protein_coding
chr10	81127897	81128009	chr10	81129298	81129312	Rxra_MA0512.2	6.49729	-	chr10	81127435	81130050	peak_40571	gene	81105914	81124697	+	end	4045	Downstream	0	0	ENSMUSG00000035027.17	ENSMUSG00000035027.17	Map2k2	KNOWN	protein_coding
chr1	127852763	127852812	chr1	127850185	127850199	Rxra_MA0512.2	2.99314	-	chr1	127849534	127850751	peak_16462	gene	127815252	127855031	-	start	4889	PeakInsideFeature	1	0.031	ENSMUSG00000051590.9	ENSMUSG00000051590.9	Map3k19	KNOWN	protein_coding
chr1	39902015	39902064	chr1	39902587	39902601	Rxra_MA0512.2	4.77513	+	chr1	39900248	39903307	peak_4458	gene	39900912	40026310	+	start	865	OverlapStart	0.783	0.019	ENSMUSG00000026074.14	ENSMUSG00000026074.14	Map4k4	KNOWN	protein_coding
chr2	92384708	92384757	chr2	92392294	92392308	Rxra_MA0512.2	3.31986	+	chr2	92391830	92392493	peak_207204	gene	92383675	92401263	-	center	308	PeakInsideFeature	1	0.038	ENSMUSG00000027223.15	ENSMUSG00000027223.15	Mapk8ip1	KNOWN	protein_coding
chr11	49866350	49866399	chr11	49870031	49870045	Rxra_MA0512.2	2.82946	+	chr11	49869557	49870260	peak_55402	gene	49846750	49886421	+	center	3323	PeakInsideFeature	1	0.018	ENSMUSG00000020366.18	ENSMUSG00000020366.18	Mapk9	KNOWN	protein_coding
chr12	111576059	111576108	chr12	111575175	111575189	Rxra_MA0512.2	4.33916	+	chr12	111573921	111576009	peak_87544	gene	111574509	111656227	+	start	456	OverlapStart	0.718	0.018	ENSMUSG00000007411.15	ENSMUSG00000007411.15	Mark3	KNOWN	protein_coding
chr10	127304346	127304395	chr10	127311863	127311877	Rxra_MA0512.2	2.84131	-	chr10	127311154	127313076	peak_47996	gene	127296220	127311786	-	start	329	OverlapStart	0.329	0.041	ENSMUSG00000040354.14	ENSMUSG00000040354.14	Mars	KNOWN	protein_coding
chr10	127304346	127304395	chr10	127312427	127312441	Rxra_MA0512.2	4.97818	-	chr10	127311154	127313076	peak_47996	gene	127296220	127311786	-	start	329	OverlapStart	0.329	0.041	ENSMUSG00000040354.14	ENSMUSG00000040354.14	Mars	KNOWN	protein_coding
chr19	42144463	42144547	chr19	42144716	42144730	Rxra_MA0512.2	4.67075	+	chr19	42144181	42145508	peak_189334	gene	42147399	42151703	+	start	2555	Upstream	0	0	ENSMUSG00000044345.9	ENSMUSG00000044345.9	Marveld1	KNOWN	protein_coding
chr18	70565557	70565639	chr18	70568991	70569005	Rxra_MA0512.2	9.46006	+	chr18	70567893	70569307	peak_180234	gene	70568188	70626131	+	start	412	OverlapStart	0.791	0.019	ENSMUSG00000024513.16	ENSMUSG00000024513.16	Mbd2	KNOWN	protein_coding
chr2	48955133	48955182	chr2	48948888	48948902	Rxra_MA0512.2	2.65955	-	chr2	48948787	48950481	peak_200747	gene	48949507	49325405	+	start	127	OverlapStart	0.575	0.002	ENSMUSG00000036792.12	ENSMUSG00000036792.12	Mbd5	KNOWN	protein_coding
chr8	34115244	34115320	chr8	34123975	34123989	Rxra_MA0512.2	5.74306	+	chr8	34123754	34124768	peak_340245	gene	34115029	34125182	+	end	921	PeakInsideFeature	1	0.1	ENSMUSG00000071113.4	ENSMUSG00000071113.4	Mboat4	KNOWN	protein_coding
chr8	34132036	34132085	chr8	34123975	34123989	Rxra_MA0512.2	5.74306	+	chr8	34123754	34124768	peak_340245	gene	34115029	34125182	+	end	921	PeakInsideFeature	1	0.1	ENSMUSG00000071113.4	ENSMUSG00000071113.4	Mboat4	KNOWN	protein_coding
chr1	20812794	20812843	chr1	20820608	20820622	Rxra_MA0512.2	3.21658	+	chr1	20819916	20820725	peak_1713	gene	20802967	20820312	-	start	8	OverlapStart	0.489	0.023	ENSMUSG00000041859.10	ENSMUSG00000041859.10	Mcm3	KNOWN	protein_coding
chr1	20812794	20812843	chr1	20820647	20820661	Rxra_MA0512.2	5.29644	+	chr1	20819916	20820725	peak_1713	gene	20802967	20820312	-	start	8	OverlapStart	0.489	0.023	ENSMUSG00000041859.10	ENSMUSG00000041859.10	Mcm3	KNOWN	protein_coding
chr8	3507214	3507263	chr8	3500917	3500931	Rxra_MA0512.2	3.54301	-	chr8	3499906	3501011	peak_335571	gene	3500456	3515232	+	start	2	OverlapStart	0.502	0.038	ENSMUSG00000004567.16	ENSMUSG00000004567.16	Mcoln1	KNOWN	protein_coding
chr13	43553100	43553149	chr13	43561312	43561326	Rxra_MA0512.2	4.77383	+	chr13	43559627	43561339	peak_94743	gene	43538411	43560191	-	start	292	OverlapStart	0.329	0.026	ENSMUSG00000021371.4	ENSMUSG00000021371.4	Mcur1	KNOWN	protein_coding
chr4	125076736	125076785	chr4	125085719	125085733	Rxra_MA0512.2	2.79417	+	chr4	125084656	125085923	peak_260936	gene	125085133	125113238	+	start	156	OverlapStart	0.624	0.028	ENSMUSG00000028863.13	ENSMUSG00000028863.13	Meaf6	KNOWN	protein_coding
chr4	125095163	125095212	chr4	125085719	125085733	Rxra_MA0512.2	2.79417	+	chr4	125084656	125085923	peak_260936	gene	125085133	125113238	+	start	156	OverlapStart	0.624	0.028	ENSMUSG00000028863.13	ENSMUSG00000028863.13	Meaf6	KNOWN	protein_coding
chr4	118411098	118411147	chr4	118409237	118409251	Rxra_MA0512.2	12.1036	-	chr4	118408877	118409948	peak_259768	gene	118409336	118415782	+	start	76	OverlapStart	0.571	0.095	ENSMUSG00000006392.16	ENSMUSG00000006392.16	Med8	KNOWN	protein_coding
chr3	88141709	88141758	chr3	88141655	88141669	Rxra_MA0512.2	8.14157	+	chr3	88141559	88143709	peak_233270	gene	88142371	88172086	+	start	263	OverlapStart	0.622	0.045	ENSMUSG00000001419.17	ENSMUSG00000001419.17	Mef2d	KNOWN	protein_coding
chr5	137786849	137786898	chr5	137786777	137786791	Rxra_MA0512.2	3.4043	+	chr5	137785799	137787985	peak_289335	gene	137781905	137787655	-	start	763	OverlapStart	0.849	0.323	ENSMUSG00000029726.16	ENSMUSG00000029726.16	Mepce	KNOWN	protein_coding
chr5	137788806	137788863	chr5	137786777	137786791	Rxra_MA0512.2	3.4043	+	chr5	137785799	137787985	peak_289335	gene	137781905	137787655	-	start	763	OverlapStart	0.849	0.323	ENSMUSG00000029726.16	ENSMUSG00000029726.16	Mepce	KNOWN	protein_coding
chr11	57515538	57515587	chr11	57518496	57518510	Rxra_MA0512.2	2.94059	-	chr11	57517932	57519696	peak_57055	gene	57518663	57533815	+	start	151	OverlapStart	0.586	0.068	ENSMUSG00000020522.13	ENSMUSG00000020522.13	Mfap3	KNOWN	protein_coding
chr11	57515538	57515587	chr11	57524707	57524721	Rxra_MA0512.2	3.83509	-	chr11	57524279	57526402	peak_57058	gene	57518663	57533815	+	center	899	PeakInsideFeature	1	0.14	ENSMUSG00000020522.13	ENSMUSG00000020522.13	Mfap3	KNOWN	protein_coding
chr11	57517181	57517230	chr11	57518496	57518510	Rxra_MA0512.2	2.94059	-	chr11	57517932	57519696	peak_57055	gene	57518663	57533815	+	start	151	OverlapStart	0.586	0.068	ENSMUSG00000020522.13	ENSMUSG00000020522.13	Mfap3	KNOWN	protein_coding
chr11	57517181	57517230	chr11	57524707	57524721	Rxra_MA0512.2	3.83509	-	chr11	57524279	57526402	peak_57058	gene	57518663	57533815	+	center	899	PeakInsideFeature	1	0.14	ENSMUSG00000020522.13	ENSMUSG00000020522.13	Mfap3	KNOWN	protein_coding
chr11	57528841	57528890	chr11	57524707	57524721	Rxra_MA0512.2	3.83509	-	chr11	57524279	57526402	peak_57058	gene	57518663	57533815	+	center	899	PeakInsideFeature	1	0.14	ENSMUSG00000020522.13	ENSMUSG00000020522.13	Mfap3	KNOWN	protein_coding
chr3	32526290	32526339	chr3	32529590	32529604	Rxra_MA0512.2	6.81019	-	chr3	32529171	32530012	peak_225996	gene	32529464	32579239	+	start	127	OverlapStart	0.652	0.011	ENSMUSG00000027668.13	ENSMUSG00000027668.13	Mfn1	KNOWN	protein_coding
chr3	32526947	32526996	chr3	32529590	32529604	Rxra_MA0512.2	6.81019	-	chr3	32529171	32530012	peak_225996	gene	32529464	32579239	+	start	127	OverlapStart	0.652	0.011	ENSMUSG00000027668.13	ENSMUSG00000027668.13	Mfn1	KNOWN	protein_coding
chr3	32529609	32529658	chr3	32529590	32529604	Rxra_MA0512.2	6.81019	-	chr3	32529171	32530012	peak_225996	gene	32529464	32579239	+	start	127	OverlapStart	0.652	0.011	ENSMUSG00000027668.13	ENSMUSG00000027668.13	Mfn1	KNOWN	protein_coding
chr1	127202446	127202495	chr1	127205972	127205986	Rxra_MA0512.2	7.40569	+	chr1	127204688	127207558	peak_16290	gene	127205014	127488336	+	start	1109	OverlapStart	0.886	0.008	ENSMUSG00000036155.13	ENSMUSG00000036155.13	Mgat5	KNOWN	protein_coding
chr16	4878242	4878291	chr16	4886966	4886980	Rxra_MA0512.2	3.06796	-	chr16	4885775	4887972	peak_140915	gene	4886099	4938296	+	start	774	OverlapStart	0.853	0.036	ENSMUSG00000022517.16	ENSMUSG00000022517.16	Mgrn1	KNOWN	protein_coding
chr16	4878242	4878291	chr16	4887296	4887310	Rxra_MA0512.2	4.0884	-	chr16	4885775	4887972	peak_140915	gene	4886099	4938296	+	start	774	OverlapStart	0.853	0.036	ENSMUSG00000022517.16	ENSMUSG00000022517.16	Mgrn1	KNOWN	protein_coding
chr10	80141987	80142036	chr10	80149104	80149118	Rxra_MA0512.2	5.60718	-	chr10	80147756	80149797	peak_40316	gene	80148271	80158368	+	start	505	OverlapStart	0.748	0.151	ENSMUSG00000035621.13	ENSMUSG00000035621.13	Midn	KNOWN	protein_coding
chr10	80141987	80142036	chr10	80149664	80149678	Rxra_MA0512.2	2.73302	-	chr10	80147756	80149797	peak_40316	gene	80148271	80158368	+	start	505	OverlapStart	0.748	0.151	ENSMUSG00000035621.13	ENSMUSG00000035621.13	Midn	KNOWN	protein_coding
chr10	80154117	80154166	chr10	80149104	80149118	Rxra_MA0512.2	5.60718	-	chr10	80147756	80149797	peak_40316	gene	80148271	80158368	+	start	505	OverlapStart	0.748	0.151	ENSMUSG00000035621.13	ENSMUSG00000035621.13	Midn	KNOWN	protein_coding
chr10	80154117	80154166	chr10	80149664	80149678	Rxra_MA0512.2	2.73302	-	chr10	80147756	80149797	peak_40316	gene	80148271	80158368	+	start	505	OverlapStart	0.748	0.151	ENSMUSG00000035621.13	ENSMUSG00000035621.13	Midn	KNOWN	protein_coding
chr10	80154117	80154166	chr10	80161098	80161112	Rxra_MA0512.2	2.88776	+	chr10	80158387	80161238	peak_40318	gene	80148271	80158368	+	end	1444	Downstream	0	0	ENSMUSG00000035621.13	ENSMUSG00000035621.13	Midn	KNOWN	protein_coding
chr16	13259298	13259352	chr16	13257139	13257153	Rxra_MA0512.2	3.80209	-	chr16	13255874	13257872	peak_142754	gene	13256480	13417529	+	start	393	OverlapStart	0.697	0.008	ENSMUSG00000009569.14	ENSMUSG00000009569.14	Mkl2	KNOWN	protein_coding
chr15	88971105	88971154	chr15	88978976	88978990	Rxra_MA0512.2	4.89332	-	chr15	88977702	88979559	peak_137561	gene	88955883	88979007	-	start	377	OverlapStart	0.703	0.056	ENSMUSG00000035805.13	ENSMUSG00000035805.13	Mlc1	KNOWN	protein_coding
chr6	124938746	124938795	chr6	124931064	124931078	Rxra_MA0512.2	2.85304	+	chr6	124930604	124932145	peak_310592	gene	124931385	124937238	+	start	11	OverlapStart	0.493	0.13	ENSMUSG00000030120.14	ENSMUSG00000030120.14	Mlf2	KNOWN	protein_coding
chr8	95346269	95346318	chr8	95352043	95352057	Rxra_MA0512.2	2.79847	+	chr8	95351567	95353683	peak_348977	gene	95352267	95374293	+	start	358	OverlapStart	0.669	0.064	ENSMUSG00000031790.7	ENSMUSG00000031790.7	Mmp15	KNOWN	protein_coding
chr11	83447244	83447339	chr11	83441377	83441391	Rxra_MA0512.2	2.80231	+	chr11	83440196	83441684	peak_62653	gene	83440767	83463071	-	end	173	OverlapEnd	0.616	0.041	ENSMUSG00000020682.17	ENSMUSG00000020682.17	Mmp28	KNOWN	protein_coding
chr11	83447244	83447339	chr11	83454689	83454703	Rxra_MA0512.2	4.97189	+	chr11	83454074	83455289	peak_62657	gene	83440767	83463071	-	center	2762	PeakInsideFeature	1	0.054	ENSMUSG00000020682.17	ENSMUSG00000020682.17	Mmp28	KNOWN	protein_coding
chr11	83461192	83461274	chr11	83454689	83454703	Rxra_MA0512.2	4.97189	+	chr11	83454074	83455289	peak_62657	gene	83440767	83463071	-	center	2762	PeakInsideFeature	1	0.054	ENSMUSG00000020682.17	ENSMUSG00000020682.17	Mmp28	KNOWN	protein_coding
chr11	102092527	102092576	chr11	102088349	102088363	Rxra_MA0512.2	3.24939	+	chr11	102086270	102089703	peak_66309	gene	102057014	102088515	-	start	529	OverlapStart	0.654	0.071	ENSMUSG00000017314.12	ENSMUSG00000017314.12	Mpp2	KNOWN	protein_coding
chr11	102092527	102092576	chr11	102089351	102089365	Rxra_MA0512.2	3.01272	-	chr11	102086270	102089703	peak_66309	gene	102057014	102088515	-	start	529	OverlapStart	0.654	0.071	ENSMUSG00000017314.12	ENSMUSG00000017314.12	Mpp2	KNOWN	protein_coding
chr18	7629510	7629559	chr18	7627017	7627031	Rxra_MA0512.2	2.76973	+	chr18	7626268	7627227	peak_170476	gene	7347961	7626863	-	start	116	OverlapStart	0.62	0.002	ENSMUSG00000057440.7	ENSMUSG00000057440.7	Mpp7	KNOWN	protein_coding
chr1	171150027	171150076	chr1	171150365	171150379	Rxra_MA0512.2	5.80547	-	chr1	171150188	171151567	peak_23962	gene	171150710	171161130	+	start	167	OverlapStart	0.621	0.082	ENSMUSG00000056569.10	ENSMUSG00000056569.10	Mpz	KNOWN	protein_coding
chr1	171156958	171157066	chr1	171150365	171150379	Rxra_MA0512.2	5.80547	-	chr1	171150188	171151567	peak_23962	gene	171150710	171161130	+	start	167	OverlapStart	0.621	0.082	ENSMUSG00000056569.10	ENSMUSG00000056569.10	Mpz	KNOWN	protein_coding
chr1	155155142	155155191	chr1	155146912	155146926	Rxra_MA0512.2	3.68446	-	chr1	155145157	155147629	peak_20756	gene	155127276	155146814	-	start	421	OverlapStart	0.67	0.085	ENSMUSG00000026471.14	ENSMUSG00000026471.14	Mr1	KNOWN	protein_coding
chr5	96271621	96271670	chr5	96267164	96267178	Rxra_MA0512.2	4.47287	+	chr5	96266857	96267770	peak_280689	gene	96209492	96266727	+	end	586	Downstream	0	0	ENSMUSG00000029486.13	ENSMUSG00000029486.13	Mrpl1	KNOWN	protein_coding
chr19	4967533	4967582	chr19	4962193	4962207	Rxra_MA0512.2	5.24031	+	chr19	4961742	4962718	peak_183500	gene	4962305	4966995	+	start	75	OverlapStart	0.423	0.088	ENSMUSG00000024902.4	ENSMUSG00000024902.4	Mrpl11	KNOWN	protein_coding
chr19	4967533	4967582	chr19	4962312	4962326	Rxra_MA0512.2	6.72068	-	chr19	4961742	4962718	peak_183500	gene	4962305	4966995	+	start	75	OverlapStart	0.423	0.088	ENSMUSG00000024902.4	ENSMUSG00000024902.4	Mrpl11	KNOWN	protein_coding
chr19	11764718	11764767	chr19	11770275	11770289	Rxra_MA0512.2	8.14157	-	chr19	11770069	11771332	peak_184657	gene	11770414	11774944	+	start	286	OverlapStart	0.727	0.203	ENSMUSG00000024683.5	ENSMUSG00000024683.5	Mrpl16	KNOWN	protein_coding
chr4	155799724	155799773	chr4	155803601	155803615	Rxra_MA0512.2	10.5005	-	chr4	155802779	155804172	peak_267922	gene	155802877	155809975	+	start	598	OverlapStart	0.93	0.182	ENSMUSG00000029066.12	ENSMUSG00000029066.12	Mrpl20	KNOWN	protein_coding
chr4	155807051	155807124	chr4	155803601	155803615	Rxra_MA0512.2	10.5005	-	chr4	155802779	155804172	peak_267922	gene	155802877	155809975	+	start	598	OverlapStart	0.93	0.182	ENSMUSG00000029066.12	ENSMUSG00000029066.12	Mrpl20	KNOWN	protein_coding
chr11	5714431	5714480	chr11	5707942	5707956	Rxra_MA0512.2	3.26675	+	chr11	5706531	5708020	peak_49133	gene	5703982	5715680	-	center	2556	PeakInsideFeature	1	0.127	ENSMUSG00000020477.10	ENSMUSG00000020477.10	Mrps24	KNOWN	protein_coding
chr3	8929300	8929349	chr3	8923329	8923343	Rxra_MA0512.2	3.85043	+	chr3	8923201	8924205	peak_223039	gene	8802145	8923918	-	start	215	OverlapStart	0.714	0.005	ENSMUSG00000040269.5	ENSMUSG00000040269.5	Mrps28	KNOWN	protein_coding
chr3	8929300	8929349	chr3	8923806	8923820	Rxra_MA0512.2	10.6891	-	chr3	8923201	8924205	peak_223039	gene	8802145	8923918	-	start	215	OverlapStart	0.714	0.005	ENSMUSG00000040269.5	ENSMUSG00000040269.5	Mrps28	KNOWN	protein_coding
chr1	42850517	42850566	chr1	42851516	42851530	Rxra_MA0512.2	8.26674	+	chr1	42850846	42851735	peak_4858	gene	42851232	42905683	+	start	58	OverlapStart	0.566	0.009	ENSMUSG00000060679.14	ENSMUSG00000060679.14	Mrps9	KNOWN	protein_coding
chr1	42854819	42854868	chr1	42851516	42851530	Rxra_MA0512.2	8.26674	+	chr1	42850846	42851735	peak_4858	gene	42851232	42905683	+	start	58	OverlapStart	0.566	0.009	ENSMUSG00000060679.14	ENSMUSG00000060679.14	Mrps9	KNOWN	protein_coding
chr17	87983663	87983712	chr17	87985070	87985084	Rxra_MA0512.2	9.37529	-	chr17	87984202	87986176	peak_169008	gene	87975049	87990883	+	center	2223	PeakInsideFeature	1	0.125	ENSMUSG00000005370.3	ENSMUSG00000005370.3	Msh6	KNOWN	protein_coding
chr17	87990290	87990339	chr17	87985070	87985084	Rxra_MA0512.2	9.37529	-	chr17	87984202	87986176	peak_169008	gene	87975049	87990883	+	center	2223	PeakInsideFeature	1	0.125	ENSMUSG00000005370.3	ENSMUSG00000005370.3	Msh6	KNOWN	protein_coding
chr17	24744861	24744910	chr17	24737086	24737100	Rxra_MA0512.2	7.14985	+	chr17	24736158	24737652	peak_158534	gene	24736641	24742778	+	start	264	OverlapStart	0.677	0.165	ENSMUSG00000075705.12	ENSMUSG00000075705.12	Msrb1	KNOWN	protein_coding
chr17	24744861	24744910	chr17	24737277	24737291	Rxra_MA0512.2	3.14718	-	chr17	24736158	24737652	peak_158534	gene	24736641	24742778	+	start	264	OverlapStart	0.677	0.165	ENSMUSG00000075705.12	ENSMUSG00000075705.12	Msrb1	KNOWN	protein_coding
chr17	24744861	24744910	chr17	24742430	24742444	Rxra_MA0512.2	7.7224	-	chr17	24742043	24743155	peak_158535	gene	24736641	24742778	+	end	179	OverlapEnd	0.661	0.12	ENSMUSG00000075705.12	ENSMUSG00000075705.12	Msrb1	KNOWN	protein_coding
chr8	94153957	94154049	chr8	94154933	94154947	Rxra_MA0512.2	5.89765	+	chr8	94152363	94155103	peak_348670	gene	94152606	94154148	+	center	356	FeatureInsidePeak	0.563	1	ENSMUSG00000031760.8	ENSMUSG00000031760.8	Mt3	KNOWN	protein_coding
chr19	3384653	3384702	chr19	3388867	3388881	Rxra_MA0512.2	4.0225	+	chr19	3388614	3389582	peak_183098	gene	3388856	3407823	+	start	242	OverlapStart	0.75	0.038	ENSMUSG00000024905.15	ENSMUSG00000024905.15	Mtl5	KNOWN	protein_coding
chr3	138120432	138120481	chr3	138117014	138117028	Rxra_MA0512.2	2.63727	-	chr3	138116595	138119796	peak_240968	gene	138089853	138144968	-	center	785	PeakInsideFeature	1	0.058	ENSMUSG00000028158.14	ENSMUSG00000028158.14	Mttp	KNOWN	protein_coding
chr13	92850551	92850600	chr13	92844761	92844775	Rxra_MA0512.2	3.2849	+	chr13	92844184	92845380	peak_102002	gene	92844786	92858230	+	start	4	OverlapStart	0.497	0.044	ENSMUSG00000021704.7	ENSMUSG00000021704.7	Mtx3	KNOWN	protein_coding
chr19	5492688	5492766	chr19	5488372	5488386	Rxra_MA0512.2	4.7506	-	chr19	5487814	5489500	peak_183620	gene	5482344	5488402	-	start	255	OverlapStart	0.349	0.097	ENSMUSG00000024906.9	ENSMUSG00000024906.9	Mus81	KNOWN	protein_coding
chr19	5492688	5492766	chr19	5489320	5489334	Rxra_MA0512.2	3.63293	+	chr19	5487814	5489500	peak_183620	gene	5482344	5488402	-	start	255	OverlapStart	0.349	0.097	ENSMUSG00000024906.9	ENSMUSG00000024906.9	Mus81	KNOWN	protein_coding
chr19	5496539	5496588	chr19	5488372	5488386	Rxra_MA0512.2	4.7506	-	chr19	5487814	5489500	peak_183620	gene	5482344	5488402	-	start	255	OverlapStart	0.349	0.097	ENSMUSG00000024906.9	ENSMUSG00000024906.9	Mus81	KNOWN	protein_coding
chr19	5496539	5496588	chr19	5489320	5489334	Rxra_MA0512.2	3.63293	+	chr19	5487814	5489500	peak_183620	gene	5482344	5488402	-	start	255	OverlapStart	0.349	0.097	ENSMUSG00000024906.9	ENSMUSG00000024906.9	Mus81	KNOWN	protein_coding
chr19	5498421	5498470	chr19	5489320	5489334	Rxra_MA0512.2	3.63293	+	chr19	5487814	5489500	peak_183620	gene	5482344	5488402	-	start	255	OverlapStart	0.349	0.097	ENSMUSG00000024906.9	ENSMUSG00000024906.9	Mus81	KNOWN	protein_coding
chr7	127013592	127013733	chr7	127014542	127014556	Rxra_MA0512.2	4.97189	+	chr7	127014294	127014715	peak_331708	gene	126986859	127014621	-	start	117	OverlapStart	0.777	0.012	ENSMUSG00000030681.18	ENSMUSG00000030681.18	Mvp	KNOWN	protein_coding
chr7	127016221	127016270	chr7	127014542	127014556	Rxra_MA0512.2	4.97189	+	chr7	127014294	127014715	peak_331708	gene	126986859	127014621	-	start	117	OverlapStart	0.777	0.012	ENSMUSG00000030681.18	ENSMUSG00000030681.18	Mvp	KNOWN	protein_coding
chr3	108374244	108374293	chr3	108372284	108372298	Rxra_MA0512.2	4.61459	+	chr3	108371300	108373538	peak_236932	gene	108364910	108380057	+	center	64	PeakInsideFeature	1	0.148	ENSMUSG00000068745.6	ENSMUSG00000068745.6	Mybphl	KNOWN	protein_coding
chr15	61992142	61992191	chr15	61987549	61987563	Rxra_MA0512.2	5.40604	-	chr15	61986716	61988038	peak_132141	gene	61985340	61990374	+	center	480	PeakInsideFeature	1	0.263	ENSMUSG00000022346.14	ENSMUSG00000022346.14	Myc	KNOWN	protein_coding
chr11	67351313	67351362	chr11	67350508	67350522	Rxra_MA0512.2	2.86847	+	chr11	67349998	67350666	peak_58928	gene	67321657	67371586	+	center	3711	PeakInsideFeature	1	0.013	ENSMUSG00000060180.12	ENSMUSG00000060180.12	Myh13	KNOWN	protein_coding
chr17	71000239	71000288	chr17	70990849	70990863	Rxra_MA0512.2	2.78502	-	chr17	70989573	70991398	peak_165940	gene	70973919	70990787	-	start	302	OverlapStart	0.665	0.072	ENSMUSG00000034868.8	ENSMUSG00000034868.8	Myl12b	KNOWN	protein_coding
chr7	127200603	127200652	chr7	127208532	127208546	Rxra_MA0512.2	5.22386	+	chr7	127208331	127209611	peak_331748	gene	127208889	127214298	+	start	82	OverlapStart	0.564	0.133	ENSMUSG00000030672.12	ENSMUSG00000030672.12	Mylpf	KNOWN	protein_coding
chr7	127206536	127206585	chr7	127208532	127208546	Rxra_MA0512.2	5.22386	+	chr7	127208331	127209611	peak_331748	gene	127208889	127214298	+	start	82	OverlapStart	0.564	0.133	ENSMUSG00000030672.12	ENSMUSG00000030672.12	Mylpf	KNOWN	protein_coding
chr11	77766451	77766532	chr11	77765224	77765238	Rxra_MA0512.2	3.12617	+	chr11	77762822	77766926	peak_61256	gene	77763245	77865980	+	start	1629	OverlapStart	0.897	0.036	ENSMUSG00000000631.20	ENSMUSG00000000631.20	Myo18a	KNOWN	protein_coding
chr11	77766451	77766532	chr11	77766883	77766897	Rxra_MA0512.2	8.31968	+	chr11	77762822	77766926	peak_61256	gene	77763245	77865980	+	start	1629	OverlapStart	0.897	0.036	ENSMUSG00000000631.20	ENSMUSG00000000631.20	Myo18a	KNOWN	protein_coding
chr11	77767466	77767515	chr11	77765224	77765238	Rxra_MA0512.2	3.12617	+	chr11	77762822	77766926	peak_61256	gene	77763245	77865980	+	start	1629	OverlapStart	0.897	0.036	ENSMUSG00000000631.20	ENSMUSG00000000631.20	Myo18a	KNOWN	protein_coding
chr11	77767466	77767515	chr11	77766883	77766897	Rxra_MA0512.2	8.31968	+	chr11	77762822	77766926	peak_61256	gene	77763245	77865980	+	start	1629	OverlapStart	0.897	0.036	ENSMUSG00000000631.20	ENSMUSG00000000631.20	Myo18a	KNOWN	protein_coding
chr9	70208208	70208257	chr9	70209937	70209951	Rxra_MA0512.2	2.84925	-	chr9	70209449	70209971	peak_366756	gene	70207349	70400067	+	start	2361	PeakInsideFeature	1	0.002	ENSMUSG00000032220.9	ENSMUSG00000032220.9	Myo1e	KNOWN	protein_coding
chr17	33554178	33554227	chr17	33555583	33555597	Rxra_MA0512.2	5.00148	-	chr17	33554708	33556401	peak_160621	gene	33555718	33607764	+	start	164	OverlapStart	0.403	0.013	ENSMUSG00000024300.16	ENSMUSG00000024300.16	Myo1f	KNOWN	protein_coding
chr7	18995320	18995369	chr7	18990481	18990495	Rxra_MA0512.2	5.17838	-	chr7	18990095	18992534	peak_315842	gene	18991244	19001766	+	start	70	OverlapStart	0.529	0.123	ENSMUSG00000048481.15	ENSMUSG00000048481.15	Mypop	KNOWN	protein_coding
chr11	51644581	51644630	chr11	51646776	51646790	Rxra_MA0512.2	7.9223	+	chr11	51646704	51647739	peak_55802	gene	51643062	51650842	-	center	269	PeakInsideFeature	1	0.133	ENSMUSG00000001053.15	ENSMUSG00000001053.15	N4bp3	KNOWN	protein_coding
chrX	73908805	73908854	chrX	73915416	73915430	Rxra_MA0512.2	4.75402	+	chrX	73914805	73915603	peak_380067	gene	73916872	73921944	-	end	1668	Downstream	0	0	ENSMUSG00000031388.14	ENSMUSG00000031388.14	Naa10	KNOWN	protein_coding
chr1	51468852	51468901	chr1	51478699	51478713	Rxra_MA0512.2	4.68315	-	chr1	51477996	51478866	peak_5680	gene	51465861	51478425	-	start	6	OverlapStart	0.493	0.034	ENSMUSG00000026107.11	ENSMUSG00000026107.11	Nabp1	KNOWN	protein_coding
chr7	143826470	143826519	chr7	143822615	143822629	Rxra_MA0512.2	4.59209	-	chr7	143822424	143823424	peak_335056	gene	143795583	143822849	-	start	75	OverlapStart	0.425	0.016	ENSMUSG00000031090.14	ENSMUSG00000031090.14	Nadsyn1	KNOWN	protein_coding
chr7	16106628	16106677	chr7	16098323	16098337	Rxra_MA0512.2	9.69645	+	chr7	16097894	16098927	peak_315516	gene	16098457	16117975	+	start	47	OverlapStart	0.455	0.024	ENSMUSG00000006024.13	ENSMUSG00000006024.13	Napa	KNOWN	protein_coding
chr3	56180060	56180109	chr3	56183641	56183655	Rxra_MA0512.2	4.3356	+	chr3	56181994	56184270	peak_229124	gene	55625194	56183701	-	start	569	OverlapStart	0.75	0.003	ENSMUSG00000027799.12	ENSMUSG00000027799.12	Nbea	KNOWN	protein_coding
chr3	56181234	56181306	chr3	56183641	56183655	Rxra_MA0512.2	4.3356	+	chr3	56181994	56184270	peak_229124	gene	55625194	56183701	-	start	569	OverlapStart	0.75	0.003	ENSMUSG00000027799.12	ENSMUSG00000027799.12	Nbea	KNOWN	protein_coding
chr5	134239835	134239884	chr5	134232207	134232221	Rxra_MA0512.2	5.8251	+	chr5	134231303	134235529	peak_288473	gene	134220052	134229625	-	start	3791	Upstream	0	0	ENSMUSG00000015950.13	ENSMUSG00000015950.13	Ncf1	KNOWN	protein_coding
chr5	134241563	134241612	chr5	134232207	134232221	Rxra_MA0512.2	5.8251	+	chr5	134231303	134235529	peak_288473	gene	134220052	134229625	-	start	3791	Upstream	0	0	ENSMUSG00000015950.13	ENSMUSG00000015950.13	Ncf1	KNOWN	protein_coding
chr10	81484485	81484534	chr10	81484587	81484601	Rxra_MA0512.2	3.93387	+	chr10	81484109	81485344	peak_40664	gene	81486248	81496392	-	end	1522	Downstream	0	0	ENSMUSG00000020238.14	ENSMUSG00000020238.14	Ncln	KNOWN	protein_coding
chr10	81494194	81494243	chr10	81484587	81484601	Rxra_MA0512.2	3.93387	+	chr10	81484109	81485344	peak_40664	gene	81486248	81496392	-	end	1522	Downstream	0	0	ENSMUSG00000020238.14	ENSMUSG00000020238.14	Ncln	KNOWN	protein_coding
chr10	81494194	81494243	chr10	81496060	81496074	Rxra_MA0512.2	7.25685	+	chr10	81495993	81496927	peak_40667	gene	81486248	81496392	-	start	68	OverlapStart	0.427	0.039	ENSMUSG00000020238.14	ENSMUSG00000020238.14	Ncln	KNOWN	protein_coding
chr10	81503166	81503215	chr10	81496060	81496074	Rxra_MA0512.2	7.25685	+	chr10	81495993	81496927	peak_40667	gene	81486248	81496392	-	start	68	OverlapStart	0.427	0.039	ENSMUSG00000020238.14	ENSMUSG00000020238.14	Ncln	KNOWN	protein_coding
chr18	38414536	38414585	chr18	38418740	38418754	Rxra_MA0512.2	4.80827	-	chr18	38418590	38420264	peak_174812	gene	38418974	38464399	+	start	453	OverlapStart	0.771	0.028	ENSMUSG00000024425.3	ENSMUSG00000024425.3	Ndfip1	KNOWN	protein_coding
chr10	127505101	127505156	chr10	127512227	127512241	Rxra_MA0512.2	4.01363	+	chr10	127511558	127513310	peak_48061	gene	127514938	127517152	+	start	2504	Upstream	0	0	ENSMUSG00000040280.9	ENSMUSG00000040280.9	Ndufa4l2	KNOWN	protein_coding
chr6	126858857	126858922	chr6	126849165	126849179	Rxra_MA0512.2	4.37957	+	chr6	126848368	126849757	peak_310989	gene	126821720	126849136	-	start	74	OverlapStart	0.553	0.028	ENSMUSG00000000399.10	ENSMUSG00000000399.10	Ndufa9	KNOWN	protein_coding
chr3	51405251	51405300	chr3	51408677	51408691	Rxra_MA0512.2	4.59779	+	chr3	51408169	51409405	peak_228023	gene	51404676	51408988	-	start	201	OverlapStart	0.663	0.19	ENSMUSG00000037152.11	ENSMUSG00000037152.11	Ndufc1	KNOWN	protein_coding
chr4	123720536	123720585	chr4	123712666	123712680	Rxra_MA0512.2	2.63116	-	chr4	123711730	123713074	peak_260671	gene	123712709	123718202	-	end	307	OverlapEnd	0.272	0.066	ENSMUSG00000028648.13	ENSMUSG00000028648.13	Ndufs5	KNOWN	protein_coding
chr19	3911786	3911835	chr19	3912489	3912503	Rxra_MA0512.2	13.0177	-	chr19	3912367	3913364	peak_183251	gene	3908869	3912717	-	start	148	OverlapStart	0.351	0.091	ENSMUSG00000059734.6	ENSMUSG00000059734.6	Ndufs8	KNOWN	protein_coding
chr19	3911786	3911835	chr19	3912404	3912418	Rxra_MA0512.2	15.6484	-	chr19	3912367	3913364	peak_183251	gene	3908869	3912717	-	start	148	OverlapStart	0.351	0.091	ENSMUSG00000059734.6	ENSMUSG00000059734.6	Ndufs8	KNOWN	protein_coding
chr19	3911786	3911835	chr19	3912628	3912642	Rxra_MA0512.2	2.64436	+	chr19	3912367	3913364	peak_183251	gene	3908869	3912717	-	start	148	OverlapStart	0.351	0.091	ENSMUSG00000059734.6	ENSMUSG00000059734.6	Ndufs8	KNOWN	protein_coding
chr19	3916111	3916160	chr19	3912404	3912418	Rxra_MA0512.2	15.6484	-	chr19	3912367	3913364	peak_183251	gene	3908869	3912717	-	start	148	OverlapStart	0.351	0.091	ENSMUSG00000059734.6	ENSMUSG00000059734.6	Ndufs8	KNOWN	protein_coding
chr19	3916111	3916160	chr19	3912628	3912642	Rxra_MA0512.2	2.64436	+	chr19	3912367	3913364	peak_183251	gene	3908869	3912717	-	start	148	OverlapStart	0.351	0.091	ENSMUSG00000059734.6	ENSMUSG00000059734.6	Ndufs8	KNOWN	protein_coding
chr19	3916111	3916160	chr19	3912489	3912503	Rxra_MA0512.2	13.0177	-	chr19	3912367	3913364	peak_183251	gene	3908869	3912717	-	start	148	OverlapStart	0.351	0.091	ENSMUSG00000059734.6	ENSMUSG00000059734.6	Ndufs8	KNOWN	protein_coding
chr9	43742056	43742105	chr9	43742938	43742952	Rxra_MA0512.2	7.39907	+	chr9	43742774	43745483	peak_360760	gene	43744575	43807454	+	start	447	OverlapStart	0.335	0.014	ENSMUSG00000032012.7	ENSMUSG00000032012.7	Nectin1	KNOWN	protein_coding
chr9	43748795	43748844	chr9	43742938	43742952	Rxra_MA0512.2	7.39907	+	chr9	43742774	43745483	peak_360760	gene	43744575	43807454	+	start	447	OverlapStart	0.335	0.014	ENSMUSG00000032012.7	ENSMUSG00000032012.7	Nectin1	KNOWN	protein_coding
chr16	46496610	46496659	chr16	46498093	46498107	Rxra_MA0512.2	4.05437	-	chr16	46496177	46498467	peak_149015	gene	46387705	46498525	-	start	1203	PeakInsideFeature	1	0.021	ENSMUSG00000022656.15	ENSMUSG00000022656.15	Nectin3	KNOWN	protein_coding
chr16	46502819	46502868	chr16	46498093	46498107	Rxra_MA0512.2	4.05437	-	chr16	46496177	46498467	peak_149015	gene	46387705	46498525	-	start	1203	PeakInsideFeature	1	0.021	ENSMUSG00000022656.15	ENSMUSG00000022656.15	Nectin3	KNOWN	protein_coding
chr2	174416525	174416608	chr2	174416047	174416061	Rxra_MA0512.2	9.13167	-	chr2	174415411	174416378	peak_221591	gene	174415803	174427502	+	start	91	OverlapStart	0.595	0.049	ENSMUSG00000016253.12	ENSMUSG00000016253.12	Nelfcd	KNOWN	protein_coding
chr2	174416525	174416608	chr2	174416062	174416076	Rxra_MA0512.2	8.60517	-	chr2	174415411	174416378	peak_221591	gene	174415803	174427502	+	start	91	OverlapStart	0.595	0.049	ENSMUSG00000016253.12	ENSMUSG00000016253.12	Nelfcd	KNOWN	protein_coding
chr2	168534829	168534878	chr2	168541447	168541461	Rxra_MA0512.2	5.2535	-	chr2	168538884	168541671	peak_220532	gene	168476409	168601657	-	center	1244	PeakInsideFeature	1	0.022	ENSMUSG00000027544.16	ENSMUSG00000027544.16	Nfatc2	KNOWN	protein_coding
chr2	168536225	168536274	chr2	168541447	168541461	Rxra_MA0512.2	5.2535	-	chr2	168538884	168541671	peak_220532	gene	168476409	168601657	-	center	1244	PeakInsideFeature	1	0.022	ENSMUSG00000027544.16	ENSMUSG00000027544.16	Nfatc2	KNOWN	protein_coding
chr15	103257126	103257175	chr15	103250407	103250421	Rxra_MA0512.2	6.3715	+	chr15	103247407	103250888	peak_140498	gene	103248211	103258403	-	end	936	OverlapEnd	0.769	0.263	ENSMUSG00000058794.12	ENSMUSG00000058794.12	Nfe2	KNOWN	protein_coding
chr15	103257126	103257175	chr15	103258285	103258299	Rxra_MA0512.2	5.08481	-	chr15	103257915	103258956	peak_140500	gene	103248211	103258403	-	start	32	OverlapStart	0.469	0.048	ENSMUSG00000058794.12	ENSMUSG00000058794.12	Nfe2	KNOWN	protein_coding
chr4	97774412	97774461	chr4	97771956	97771970	Rxra_MA0512.2	3.84145	-	chr4	97771889	97773636	peak_256003	gene	97772733	98118874	+	start	29	OverlapStart	0.517	0.002	ENSMUSG00000028565.18	ENSMUSG00000028565.18	Nfia	KNOWN	protein_coding
chr4	97774412	97774461	chr4	97772798	97772812	Rxra_MA0512.2	2.74006	+	chr4	97771889	97773636	peak_256003	gene	97772733	98118874	+	start	29	OverlapStart	0.517	0.002	ENSMUSG00000028565.18	ENSMUSG00000028565.18	Nfia	KNOWN	protein_coding
chr10	81434513	81434562	chr10	81430155	81430169	Rxra_MA0512.2	9.73949	+	chr10	81429522	81431841	peak_40645	gene	81396185	81431005	-	start	324	OverlapStart	0.639	0.043	ENSMUSG00000055053.17	ENSMUSG00000055053.17	Nfic	KNOWN	protein_coding
chr19	46305482	46305531	chr19	46304644	46304658	Rxra_MA0512.2	3.38465	-	chr19	46304081	46305878	peak_190167	gene	46304736	46312090	+	start	243	OverlapStart	0.636	0.155	ENSMUSG00000025225.14	ENSMUSG00000025225.14	Nfkb2	KNOWN	protein_coding
chr17	45556445	45556517	chr17	45555909	45555923	Rxra_MA0512.2	3.61621	-	chr17	45555351	45558251	peak_162088	gene	45555715	45563169	+	start	1086	OverlapStart	0.874	0.34	ENSMUSG00000023947.7	ENSMUSG00000023947.7	Nfkbie	KNOWN	protein_coding
chr16	55826211	55826260	chr16	55820378	55820392	Rxra_MA0512.2	4.09873	-	chr16	55820309	55822688	peak_149839	gene	55811374	55838899	-	center	3638	PeakInsideFeature	1	0.086	ENSMUSG00000035356.16	ENSMUSG00000035356.16	Nfkbiz	KNOWN	protein_coding
chr14	55013245	55013294	chr14	55014580	55014594	Rxra_MA0512.2	4.75402	+	chr14	55014566	55015876	peak_115372	gene	55015453	55024135	+	start	232	OverlapStart	0.323	0.049	ENSMUSG00000022204.8	ENSMUSG00000022204.8	Ngdn	KNOWN	protein_coding
chr1	75127958	75128007	chr1	75124996	75125010	Rxra_MA0512.2	3.28637	+	chr1	75124403	75125608	peak_9638	gene	74967138	75125200	-	start	195	OverlapStart	0.661	0.005	ENSMUSG00000026162.7	ENSMUSG00000026162.7	Nhej1	KNOWN	protein_coding
chr1	75127958	75128007	chr1	75125043	75125057	Rxra_MA0512.2	3.43444	+	chr1	75124403	75125608	peak_9638	gene	74967138	75125200	-	start	195	OverlapStart	0.661	0.005	ENSMUSG00000026162.7	ENSMUSG00000026162.7	Nhej1	KNOWN	protein_coding
chr3	53470136	53470185	chr3	53463296	53463310	Rxra_MA0512.2	3.10239	-	chr3	53462629	53464160	peak_228545	gene	53448582	53463332	-	start	62	OverlapStart	0.459	0.048	ENSMUSG00000042997.13	ENSMUSG00000042997.13	Nhlrc3	KNOWN	protein_coding
chr13	49190225	49190274	chr13	49187060	49187074	Rxra_MA0512.2	4.16109	-	chr13	49186683	49188920	peak_96035	gene	49187484	49196244	+	start	317	OverlapStart	0.642	0.164	ENSMUSG00000037966.15	ENSMUSG00000037966.15	Ninj1	KNOWN	protein_coding
chr13	49190225	49190274	chr13	49187202	49187216	Rxra_MA0512.2	7.4245	+	chr13	49186683	49188920	peak_96035	gene	49187484	49196244	+	start	317	OverlapStart	0.642	0.164	ENSMUSG00000037966.15	ENSMUSG00000037966.15	Ninj1	KNOWN	protein_coding
chr13	49190225	49190274	chr13	49188315	49188329	Rxra_MA0512.2	5.96881	-	chr13	49186683	49188920	peak_96035	gene	49187484	49196244	+	start	317	OverlapStart	0.642	0.164	ENSMUSG00000037966.15	ENSMUSG00000037966.15	Ninj1	KNOWN	protein_coding
chr13	49190225	49190274	chr13	49196762	49196776	Rxra_MA0512.2	3.24496	-	chr13	49195855	49197789	peak_96037	gene	49187484	49196244	+	end	578	OverlapEnd	0.201	0.044	ENSMUSG00000037966.15	ENSMUSG00000037966.15	Ninj1	KNOWN	protein_coding
chr14	31174304	31174353	chr14	31172996	31173010	Rxra_MA0512.2	2.75755	+	chr14	31172486	31173825	peak_112045	gene	31170929	31216946	-	end	2226	PeakInsideFeature	1	0.029	ENSMUSG00000021910.15	ENSMUSG00000021910.15	Nisch	KNOWN	protein_coding
chr14	31190957	31191006	chr14	31194938	31194952	Rxra_MA0512.2	3.47471	+	chr14	31193771	31196423	peak_112051	gene	31170929	31216946	-	center	1160	PeakInsideFeature	1	0.058	ENSMUSG00000021910.15	ENSMUSG00000021910.15	Nisch	KNOWN	protein_coding
chr8	107402639	107402688	chr8	107411496	107411510	Rxra_MA0512.2	3.29839	-	chr8	107411227	107412421	peak_350403	gene	107412485	107425051	-	end	661	Downstream	0	0	ENSMUSG00000003848.14	ENSMUSG00000003848.14	Nob1	KNOWN	protein_coding
chr8	107414854	107414944	chr8	107411496	107411510	Rxra_MA0512.2	3.29839	-	chr8	107411227	107412421	peak_350403	gene	107412485	107425051	-	end	661	Downstream	0	0	ENSMUSG00000003848.14	ENSMUSG00000003848.14	Nob1	KNOWN	protein_coding
chr13	43404081	43404130	chr13	43398368	43398382	Rxra_MA0512.2	12.5545	+	chr13	43398066	43398982	peak_94689	gene	43398375	43402858	+	start	149	OverlapStart	0.663	0.135	ENSMUSG00000063200.3	ENSMUSG00000063200.3	Nol7	KNOWN	protein_coding
chr6	125126566	125126615	chr6	125131387	125131401	Rxra_MA0512.2	7.31499	+	chr6	125131229	125132480	peak_310641	gene	125131908	125144753	+	start	54	OverlapStart	0.457	0.045	ENSMUSG00000038279.10	ENSMUSG00000038279.10	Nop2	KNOWN	protein_coding
chr2	26482542	26482591	chr2	26483454	26483468	Rxra_MA0512.2	3.26664	+	chr2	26482957	26484066	peak_196818	gene	26457902	26516663	-	center	3771	PeakInsideFeature	1	0.019	ENSMUSG00000026923.15	ENSMUSG00000026923.15	Notch1	KNOWN	protein_coding
chr15	54741712	54741761	chr15	54745918	54745932	Rxra_MA0512.2	2.86457	+	chr15	54744729	54748136	peak_131013	gene	54745701	54754039	+	start	731	OverlapStart	0.715	0.292	ENSMUSG00000037362.8	ENSMUSG00000037362.8	Nov	KNOWN	protein_coding
chr15	54749878	54749927	chr15	54745918	54745932	Rxra_MA0512.2	2.86457	+	chr15	54744729	54748136	peak_131013	gene	54745701	54754039	+	start	731	OverlapStart	0.715	0.292	ENSMUSG00000037362.8	ENSMUSG00000037362.8	Nov	KNOWN	protein_coding
chr1	153506185	153506234	chr1	153501947	153501961	Rxra_MA0512.2	5.76061	+	chr1	153501280	153502549	peak_20342	gene	153503014	153550045	-	end	1100	Downstream	0	0	ENSMUSG00000042684.8	ENSMUSG00000042684.8	Npl	KNOWN	protein_coding
chr11	32235596	32235659	chr11	32243836	32243850	Rxra_MA0512.2	10.6039	+	chr11	32243189	32245752	peak_52633	gene	32225627	32267707	-	center	2197	PeakInsideFeature	1	0.061	ENSMUSG00000020289.15	ENSMUSG00000020289.15	Nprl3	KNOWN	protein_coding
chr1	191085368	191085417	chr1	191085390	191085404	Rxra_MA0512.2	7.93086	-	chr1	191084929	191087331	peak_27664	gene	191063011	191086474	+	end	344	OverlapEnd	0.643	0.066	ENSMUSG00000062510.12	ENSMUSG00000062510.12	Nsl1	KNOWN	protein_coding
chr1	191085368	191085417	chr1	191086785	191086799	Rxra_MA0512.2	5.6874	-	chr1	191084929	191087331	peak_27664	gene	191063011	191086474	+	end	344	OverlapEnd	0.643	0.066	ENSMUSG00000062510.12	ENSMUSG00000062510.12	Nsl1	KNOWN	protein_coding
chr12	16657438	16657487	chr12	16657429	16657443	Rxra_MA0512.2	4.69052	-	chr12	16656682	16657748	peak_73048	gene	16653469	16660236	+	center	363	PeakInsideFeature	1	0.158	ENSMUSG00000020591.10	ENSMUSG00000020591.10	Ntsr2	KNOWN	protein_coding
chr12	16666425	16666474	chr12	16657429	16657443	Rxra_MA0512.2	4.69052	-	chr12	16656682	16657748	peak_73048	gene	16653469	16660236	+	center	363	PeakInsideFeature	1	0.158	ENSMUSG00000020591.10	ENSMUSG00000020591.10	Ntsr2	KNOWN	protein_coding
chr1	132333272	132333345	chr1	132333943	132333957	Rxra_MA0512.2	4.73375	+	chr1	132333537	132336055	peak_17274	gene	132316125	132333488	+	end	1308	Downstream	0	0	ENSMUSG00000009772.15	ENSMUSG00000009772.15	Nuak2	KNOWN	protein_coding
chr11	40732795	40732844	chr11	40733701	40733715	Rxra_MA0512.2	3.77327	+	chr11	40733237	40734246	peak_54026	gene	40733666	40740046	+	start	75	OverlapStart	0.575	0.091	ENSMUSG00000020328.10	ENSMUSG00000020328.10	Nudcd2	KNOWN	protein_coding
chr17	59006689	59006738	chr17	59013390	59013404	Rxra_MA0512.2	5.80182	+	chr17	59011664	59013514	peak_164178	gene	58999617	59013372	-	start	783	OverlapStart	0.923	0.124	ENSMUSG00000024228.12	ENSMUSG00000024228.12	Nudt12	KNOWN	protein_coding
chr17	59008437	59008486	chr17	59013390	59013404	Rxra_MA0512.2	5.80182	+	chr17	59011664	59013514	peak_164178	gene	58999617	59013372	-	start	783	OverlapStart	0.923	0.124	ENSMUSG00000024228.12	ENSMUSG00000024228.12	Nudt12	KNOWN	protein_coding
chr4	41464493	41464542	chr4	41470773	41470787	Rxra_MA0512.2	3.97819	-	chr4	41470313	41471574	peak_248481	gene	41465150	41480926	+	center	2095	PeakInsideFeature	1	0.08	ENSMUSG00000028443.6	ENSMUSG00000028443.6	Nudt2	KNOWN	protein_coding
chr4	41466239	41466288	chr4	41470773	41470787	Rxra_MA0512.2	3.97819	-	chr4	41470313	41471574	peak_248481	gene	41465150	41480926	+	center	2095	PeakInsideFeature	1	0.08	ENSMUSG00000028443.6	ENSMUSG00000028443.6	Nudt2	KNOWN	protein_coding
chr4	41468306	41468355	chr4	41470773	41470787	Rxra_MA0512.2	3.97819	-	chr4	41470313	41471574	peak_248481	gene	41465150	41480926	+	center	2095	PeakInsideFeature	1	0.08	ENSMUSG00000028443.6	ENSMUSG00000028443.6	Nudt2	KNOWN	protein_coding
chr2	30344219	30344268	chr2	30343663	30343677	Rxra_MA0512.2	3.13633	-	chr2	30342098	30345050	peak_197749	gene	30286396	30344266	+	end	692	OverlapEnd	0.734	0.037	ENSMUSG00000052533.14	ENSMUSG00000052533.14	Nup188	KNOWN	protein_coding
chr8	94219028	94219077	chr8	94214957	94214971	Rxra_MA0512.2	2.70727	-	chr8	94213790	94215078	peak_348686	gene	94214596	94315066	+	start	162	OverlapStart	0.374	0.004	ENSMUSG00000032939.13	ENSMUSG00000032939.13	Nup93	KNOWN	protein_coding
chr14	55882781	55882830	chr14	55874098	55874112	Rxra_MA0512.2	2.79914	+	chr14	55873604	55874616	peak_115541	gene	55854035	55874735	+	end	625	PeakInsideFeature	1	0.049	ENSMUSG00000075592.9	ENSMUSG00000075592.9	Nynrin	KNOWN	protein_coding
chr7	132578560	132578609	chr7	132576718	132576732	Rxra_MA0512.2	8.51687	-	chr7	132575626	132576859	peak_332835	gene	132557477	132576398	-	start	156	OverlapStart	0.626	0.041	ENSMUSG00000030934.9	ENSMUSG00000030934.9	Oat	KNOWN	protein_coding
chr16	91270267	91270316	chr16	91269735	91269749	Rxra_MA0512.2	2.72586	+	chr16	91269360	91271776	peak_153589	gene	91269771	91271933	+	center	284	OverlapStart	0.83	0.927	ENSMUSG00000046160.6	ENSMUSG00000046160.6	Olig1	KNOWN	protein_coding
chr11	79501077	79501126	chr11	79503950	79503964	Rxra_MA0512.2	4.69135	+	chr11	79501764	79504881	peak_61725	gene	79500981	79504084	-	start	762	OverlapStart	0.744	0.748	ENSMUSG00000049612.10	ENSMUSG00000049612.10	Omg	KNOWN	protein_coding
chr15	76322953	76323002	chr15	76313419	76313433	Rxra_MA0512.2	10.2654	+	chr15	76312315	76313773	peak_134590	gene	76296596	76328015	-	center	739	PeakInsideFeature	1	0.046	ENSMUSG00000022562.14	ENSMUSG00000022562.14	Oplah	KNOWN	protein_coding
chr4	109200508	109200557	chr4	109201684	109201698	Rxra_MA0512.2	4.99777	-	chr4	109201385	109202538	peak_258591	gene	109061144	109202272	-	start	311	OverlapStart	0.769	0.006	ENSMUSG00000028559.17	ENSMUSG00000028559.17	Osbpl9	KNOWN	protein_coding
chr5	38303317	38303366	chr5	38307844	38307858	Rxra_MA0512.2	4.8831	-	chr5	38307453	38308207	peak_273763	gene	38275971	38304217	+	end	3613	Downstream	0	0	ENSMUSG00000051596.13	ENSMUSG00000051596.13	Otop1	KNOWN	protein_coding
chr15	27632172	27632221	chr15	27630720	27630734	Rxra_MA0512.2	12.7809	-	chr15	27629968	27631269	peak_127310	gene	27605918	27630693	-	start	75	OverlapStart	0.557	0.029	ENSMUSG00000046034.7	ENSMUSG00000046034.7	Otulin	KNOWN	protein_coding
chr14	16239341	16239390	chr14	16243366	16243380	Rxra_MA0512.2	8.55573	+	chr14	16242850	16244636	peak_108815	gene	16238655	16249808	-	center	488	PeakInsideFeature	1	0.16	ENSMUSG00000021786.12	ENSMUSG00000021786.12	Oxsm	KNOWN	protein_coding
chr5	122707369	122707418	chr5	122707909	122707923	Rxra_MA0512.2	4.35391	+	chr5	122707101	122708322	peak_286156	gene	122707543	122729738	+	start	168	OverlapStart	0.638	0.035	ENSMUSG00000029470.15	ENSMUSG00000029470.15	P2rx4	KNOWN	protein_coding
chr5	122689806	122689855	chr5	122693699	122693713	Rxra_MA0512.2	2.71136	+	chr5	122692578	122694466	peak_286153	gene	122643910	122691432	+	end	2090	Downstream	0	0	ENSMUSG00000029468.17	ENSMUSG00000029468.17	P2rx7	KNOWN	protein_coding
chr17	10402187	10402236	chr17	10402092	10402106	Rxra_MA0512.2	3.58772	+	chr17	10401782	10403329	peak_156851	gene	10403011	10840311	-	end	456	OverlapEnd	0.206	7e-04	ENSMUSG00000037196.6	ENSMUSG00000037196.6	Pacrg	KNOWN	protein_coding
chr17	10407885	10407949	chr17	10402092	10402106	Rxra_MA0512.2	3.58772	+	chr17	10401782	10403329	peak_156851	gene	10403011	10840311	-	end	456	OverlapEnd	0.206	7e-04	ENSMUSG00000037196.6	ENSMUSG00000037196.6	Pacrg	KNOWN	protein_coding
chr19	5275886	5275935	chr19	5274456	5274470	Rxra_MA0512.2	4.25898	-	chr19	5272310	5274641	peak_183578	gene	5133687	5273119	-	start	356	OverlapStart	0.347	0.005	ENSMUSG00000024855.9	ENSMUSG00000024855.9	Pacs1	KNOWN	protein_coding
chr4	140901430	140901479	chr4	140911031	140911045	Rxra_MA0512.2	2.84135	+	chr4	140910723	140911409	peak_264840	gene	140906343	140952586	+	start	4723	PeakInsideFeature	1	0.015	ENSMUSG00000028927.6	ENSMUSG00000028927.6	Padi2	KNOWN	protein_coding
chr5	97114787	97114836	chr5	97111771	97111785	Rxra_MA0512.2	2.62891	-	chr5	97110784	97112087	peak_280912	gene	97082328	97111596	-	start	161	OverlapStart	0.623	0.028	ENSMUSG00000055725.11	ENSMUSG00000055725.11	Paqr3	KNOWN	protein_coding
chr8	127062822	127062898	chr8	127063762	127063776	Rxra_MA0512.2	4.33928	+	chr8	127063298	127065276	peak_354528	gene	127063892	127612286	+	start	395	OverlapStart	0.7	0.002	ENSMUSG00000025812.17	ENSMUSG00000025812.17	Pard3	KNOWN	protein_coding
chr18	80043961	80044010	chr18	80042232	80042246	Rxra_MA0512.2	3.98377	-	chr18	80041523	80042301	peak_181740	gene	80046894	80119640	+	start	4982	Upstream	0	0	ENSMUSG00000056214.8	ENSMUSG00000056214.8	Pard6g	KNOWN	protein_coding
chr18	80051749	80051798	chr18	80042232	80042246	Rxra_MA0512.2	3.98377	-	chr18	80041523	80042301	peak_181740	gene	80046894	80119640	+	start	4982	Upstream	0	0	ENSMUSG00000056214.8	ENSMUSG00000056214.8	Pard6g	KNOWN	protein_coding
chr9	106478738	106478787	chr9	106476473	106476487	Rxra_MA0512.2	6.00665	+	chr9	106476155	106477503	peak_372455	gene	106470321	106476949	-	start	120	OverlapStart	0.589	0.12	ENSMUSG00000023249.14	ENSMUSG00000023249.14	Parp3	KNOWN	protein_coding
chr15	84235779	84235832	chr15	84231725	84231739	Rxra_MA0512.2	3.10162	+	chr15	84230858	84232527	peak_136537	gene	84232042	84315688	+	start	350	OverlapStart	0.291	0.005	ENSMUSG00000022438.6	ENSMUSG00000022438.6	Parvb	KNOWN	protein_coding
chr16	91039934	91039983	chr16	91044613	91044627	Rxra_MA0512.2	2.79726	+	chr16	91043580	91045096	peak_153540	gene	91014036	91044543	-	start	205	OverlapStart	0.635	0.032	ENSMUSG00000022974.12	ENSMUSG00000022974.12	Paxbp1	KNOWN	protein_coding
chr14	65808390	65808439	chr14	65805811	65805825	Rxra_MA0512.2	5.94278	-	chr14	65805346	65806473	peak_117559	gene	65805836	65817822	+	start	73	OverlapStart	0.565	0.053	ENSMUSG00000022033.9	ENSMUSG00000022033.9	Pbk	KNOWN	protein_coding
chr9	106445787	106445836	chr9	106454266	106454280	Rxra_MA0512.2	6.47431	-	chr9	106453280	106455512	peak_372448	gene	106453290	106464012	+	start	1106	OverlapStart	0.996	0.207	ENSMUSG00000023495.12	ENSMUSG00000023495.12	Pcbp4	KNOWN	protein_coding
chr18	37827308	37827357	chr18	37825426	37825440	Rxra_MA0512.2	5.0262	-	chr18	37823954	37826775	peak_174665	gene	37806363	37841873	+	center	1246	PeakInsideFeature	1	0.079	ENSMUSG00000102918.1	ENSMUSG00000102918.1	Pcdhgc3	KNOWN	protein_coding
chr1	171193973	171194022	chr1	171184571	171184585	Rxra_MA0512.2	3.28646	+	chr1	171183115	171186001	peak_23973	gene	171173261	171196268	-	center	206	PeakInsideFeature	1	0.125	ENSMUSG00000038370.6	ENSMUSG00000038370.6	Pcp4l1	KNOWN	protein_coding
chr5	145134562	145134611	chr5	145139653	145139667	Rxra_MA0512.2	3.98495	+	chr5	145139473	145140823	peak_290923	gene	145128768	145140238	-	start	90	OverlapStart	0.567	0.067	ENSMUSG00000029623.14	ENSMUSG00000029623.14	Pdap1	KNOWN	protein_coding
chr5	145138888	145138937	chr5	145139653	145139667	Rxra_MA0512.2	3.98495	+	chr5	145139473	145140823	peak_290923	gene	145128768	145140238	-	start	90	OverlapStart	0.567	0.067	ENSMUSG00000029623.14	ENSMUSG00000029623.14	Pdap1	KNOWN	protein_coding
chr1	94030896	94030972	chr1	94035702	94035716	Rxra_MA0512.2	3.42638	-	chr1	94034807	94035986	peak_13545	gene	94038304	94052553	-	end	2908	Downstream	0	0	ENSMUSG00000026285.7	ENSMUSG00000026285.7	Pdcd1	KNOWN	protein_coding
chr9	65342214	65342263	chr9	65345739	65345753	Rxra_MA0512.2	5.38493	+	chr9	65345455	65347237	peak_365682	gene	65346067	65359642	+	start	279	OverlapStart	0.657	0.086	ENSMUSG00000041837.3	ENSMUSG00000041837.3	Pdcd7	KNOWN	protein_coding
chr9	65350235	65350284	chr9	65345739	65345753	Rxra_MA0512.2	5.38493	+	chr9	65345455	65347237	peak_365682	gene	65346067	65359642	+	start	279	OverlapStart	0.657	0.086	ENSMUSG00000041837.3	ENSMUSG00000041837.3	Pdcd7	KNOWN	protein_coding
chr9	21166604	21166695	chr9	21161776	21161790	Rxra_MA0512.2	12.2161	-	chr9	21161024	21161931	peak_356651	gene	21165713	21213248	+	start	4236	Upstream	0	0	ENSMUSG00000032177.16	ENSMUSG00000032177.16	Pde4a	KNOWN	protein_coding
chr9	21166604	21166695	chr9	21165490	21165504	Rxra_MA0512.2	3.47556	-	chr9	21164949	21165593	peak_356653	gene	21165713	21213248	+	start	442	Upstream	0	0	ENSMUSG00000032177.16	ENSMUSG00000032177.16	Pde4a	KNOWN	protein_coding
chr9	21166604	21166695	chr9	21168674	21168688	Rxra_MA0512.2	5.65379	-	chr9	21167503	21169265	peak_356655	gene	21165713	21213248	+	start	2671	PeakInsideFeature	1	0.037	ENSMUSG00000032177.16	ENSMUSG00000032177.16	Pde4a	KNOWN	protein_coding
chr15	80008771	80008820	chr15	80004987	80005001	Rxra_MA0512.2	3.36653	+	chr15	80003541	80006512	peak_135476	gene	79995899	80014808	-	center	327	PeakInsideFeature	1	0.157	ENSMUSG00000000489.6	ENSMUSG00000000489.6	Pdgfb	KNOWN	protein_coding
chr15	80008771	80008820	chr15	80015259	80015273	Rxra_MA0512.2	3.13997	-	chr15	80014384	80015907	peak_135479	gene	79995899	80014808	-	start	337	OverlapStart	0.278	0.022	ENSMUSG00000000489.6	ENSMUSG00000000489.6	Pdgfb	KNOWN	protein_coding
chr15	80014796	80014845	chr15	80004987	80005001	Rxra_MA0512.2	3.36653	+	chr15	80003541	80006512	peak_135476	gene	79995899	80014808	-	center	327	PeakInsideFeature	1	0.157	ENSMUSG00000000489.6	ENSMUSG00000000489.6	Pdgfb	KNOWN	protein_coding
chr15	80014796	80014845	chr15	80015259	80015273	Rxra_MA0512.2	3.13997	-	chr15	80014384	80015907	peak_135479	gene	79995899	80014808	-	start	337	OverlapStart	0.278	0.022	ENSMUSG00000000489.6	ENSMUSG00000000489.6	Pdgfb	KNOWN	protein_coding
chr4	134282130	134282204	chr4	134288959	134288973	Rxra_MA0512.2	3.62038	+	chr4	134286763	134289179	peak_263076	gene	134275001	134287895	-	start	76	OverlapStart	0.469	0.088	ENSMUSG00000050890.15	ENSMUSG00000050890.15	Pdik1l	KNOWN	protein_coding
chr7	119523738	119523787	chr7	119526273	119526287	Rxra_MA0512.2	4.61634	-	chr7	119525438	119527523	peak_330246	gene	119486586	119523489	-	start	2991	Upstream	0	0	ENSMUSG00000030968.3	ENSMUSG00000030968.3	Pdilt	KNOWN	protein_coding
chr7	119530031	119530080	chr7	119526273	119526287	Rxra_MA0512.2	4.61634	-	chr7	119525438	119527523	peak_330246	gene	119486586	119523489	-	start	2991	Upstream	0	0	ENSMUSG00000030968.3	ENSMUSG00000030968.3	Pdilt	KNOWN	protein_coding
chr7	119533498	119533547	chr7	119526273	119526287	Rxra_MA0512.2	4.61634	-	chr7	119525438	119527523	peak_330246	gene	119486586	119523489	-	start	2991	Upstream	0	0	ENSMUSG00000030968.3	ENSMUSG00000030968.3	Pdilt	KNOWN	protein_coding
chr14	70178192	70178241	chr14	70175918	70175932	Rxra_MA0512.2	3.43239	+	chr14	70175059	70177429	peak_118365	gene	70164217	70177681	-	start	1437	PeakInsideFeature	1	0.176	ENSMUSG00000022090.10	ENSMUSG00000022090.10	Pdlim2	KNOWN	protein_coding
chr11	54070258	54070315	chr11	54071950	54071964	Rxra_MA0512.2	5.3138	-	chr11	54071771	54072041	peak_56378	gene	54054927	54069014	-	start	2892	Upstream	0	0	ENSMUSG00000020388.12	ENSMUSG00000020388.12	Pdlim4	KNOWN	protein_coding
chr17	24155031	24155080	chr17	24152244	24152258	Rxra_MA0512.2	6.49802	+	chr17	24151484	24152897	peak_158403	gene	24073679	24150924	-	start	1266	Upstream	0	0	ENSMUSG00000024122.16	ENSMUSG00000024122.16	Pdpk1	KNOWN	protein_coding
chr1	72269227	72269276	chr1	72261739	72261753	Rxra_MA0512.2	2.86383	-	chr1	72261328	72262487	peak_9069	gene	72259166	72284314	-	end	2741	PeakInsideFeature	1	0.046	ENSMUSG00000026189.13	ENSMUSG00000026189.13	Pecr	KNOWN	protein_coding
chr13	115086305	115086354	chr13	115090700	115090714	Rxra_MA0512.2	4.06346	+	chr13	115089357	115091132	peak_106497	gene	115088356	115090188	-	start	56	OverlapStart	0.468	0.454	ENSMUSG00000042275.8	ENSMUSG00000042275.8	Pelo	KNOWN	protein_coding
chr11	23667242	23667291	chr11	23666471	23666485	Rxra_MA0512.2	2.83879	+	chr11	23665280	23667372	peak_51400	gene	23646478	23665959	-	start	367	OverlapStart	0.325	0.035	ENSMUSG00000020283.5	ENSMUSG00000020283.5	Pex13	KNOWN	protein_coding
chr6	124412172	124412221	chr6	124414755	124414769	Rxra_MA0512.2	3.75139	-	chr6	124414164	124416200	peak_310475	gene	124396815	124415067	-	start	115	OverlapStart	0.444	0.049	ENSMUSG00000005069.12	ENSMUSG00000005069.12	Pex5	KNOWN	protein_coding
chr12	85163626	85163675	chr12	85170251	85170265	Rxra_MA0512.2	4.13526	+	chr12	85169274	85170753	peak_82945	gene	85166638	85177296	-	center	1954	PeakInsideFeature	1	0.139	ENSMUSG00000004791.6	ENSMUSG00000004791.6	Pgf	KNOWN	protein_coding
chr8	71584218	71584267	chr8	71592463	71592477	Rxra_MA0512.2	2.79408	-	chr8	71591471	71592855	peak_344784	gene	71592175	71601092	+	start	12	OverlapStart	0.491	0.076	ENSMUSG00000031807.10	ENSMUSG00000031807.10	Pgls	KNOWN	protein_coding
chr8	71596940	71596989	chr8	71592463	71592477	Rxra_MA0512.2	2.79408	-	chr8	71591471	71592855	peak_344784	gene	71592175	71601092	+	start	12	OverlapStart	0.491	0.076	ENSMUSG00000031807.10	ENSMUSG00000031807.10	Pgls	KNOWN	protein_coding
chr8	71597764	71597813	chr8	71592463	71592477	Rxra_MA0512.2	2.79408	-	chr8	71591471	71592855	peak_344784	gene	71592175	71601092	+	start	12	OverlapStart	0.491	0.076	ENSMUSG00000031807.10	ENSMUSG00000031807.10	Pgls	KNOWN	protein_coding
chr10	99128915	99128965	chr10	99127809	99127823	Rxra_MA0512.2	4.67699	+	chr10	99126240	99128424	peak_43784	gene	99125166	99126325	-	start	1007	OverlapStart	0.039	0.073	ENSMUSG00000055108.6	ENSMUSG00000055108.6	Phxr2	KNOWN	protein_coding
chr2	30267192	30267241	chr2	30266843	30266857	Rxra_MA0512.2	5.27849	-	chr2	30265470	30266925	peak_197734	gene	30266202	30282149	+	start	5	OverlapStart	0.497	0.045	ENSMUSG00000079484.12	ENSMUSG00000079484.12	Phyhd1	KNOWN	protein_coding
chr2	30268180	30268229	chr2	30266843	30266857	Rxra_MA0512.2	5.27849	-	chr2	30265470	30266925	peak_197734	gene	30266202	30282149	+	start	5	OverlapStart	0.497	0.045	ENSMUSG00000079484.12	ENSMUSG00000079484.12	Phyhd1	KNOWN	protein_coding
chr14	70455873	70455922	chr14	70457357	70457371	Rxra_MA0512.2	3.58199	-	chr14	70456842	70459478	peak_118429	gene	70457475	70468832	+	start	685	OverlapStart	0.76	0.176	ENSMUSG00000003469.9	ENSMUSG00000003469.9	Phyhip	KNOWN	protein_coding
chr14	70458969	70459018	chr14	70457357	70457371	Rxra_MA0512.2	3.58199	-	chr14	70456842	70459478	peak_118429	gene	70457475	70468832	+	start	685	OverlapStart	0.76	0.176	ENSMUSG00000003469.9	ENSMUSG00000003469.9	Phyhip	KNOWN	protein_coding
chr14	70463008	70463057	chr14	70457357	70457371	Rxra_MA0512.2	3.58199	-	chr14	70456842	70459478	peak_118429	gene	70457475	70468832	+	start	685	OverlapStart	0.76	0.176	ENSMUSG00000003469.9	ENSMUSG00000003469.9	Phyhip	KNOWN	protein_coding
chr11	51582150	51582199	chr11	51584172	51584186	Rxra_MA0512.2	3.21839	+	chr11	51584063	51585228	peak_55784	gene	51584756	51604489	+	start	111	OverlapStart	0.405	0.024	ENSMUSG00000020359.13	ENSMUSG00000020359.13	Phykpl	KNOWN	protein_coding
chr11	51582150	51582199	chr11	51585008	51585022	Rxra_MA0512.2	4.26374	-	chr11	51584063	51585228	peak_55784	gene	51584756	51604489	+	start	111	OverlapStart	0.405	0.024	ENSMUSG00000020359.13	ENSMUSG00000020359.13	Phykpl	KNOWN	protein_coding
chr9	62982721	62982770	chr9	62981193	62981207	Rxra_MA0512.2	3.85499	-	chr9	62980091	62981268	peak_365109	gene	62880076	62980879	-	start	200	OverlapStart	0.669	0.007	ENSMUSG00000032405.9	ENSMUSG00000032405.9	Pias1	KNOWN	protein_coding
chr9	62983678	62983727	chr9	62981193	62981207	Rxra_MA0512.2	3.85499	-	chr9	62980091	62981268	peak_365109	gene	62880076	62980879	-	start	200	OverlapStart	0.669	0.007	ENSMUSG00000032405.9	ENSMUSG00000032405.9	Pias1	KNOWN	protein_coding
chr16	31939786	31939835	chr16	31932230	31932244	Rxra_MA0512.2	7.37628	+	chr16	31932082	31934366	peak_146082	gene	31933850	31946046	+	start	626	OverlapStart	0.226	0.042	ENSMUSG00000045625.4	ENSMUSG00000045625.4	Pigz	KNOWN	protein_coding
chr5	32781710	32781762	chr5	32785344	32785358	Rxra_MA0512.2	3.90032	-	chr5	32785049	32786169	peak_272478	gene	32736300	32785646	-	start	37	OverlapStart	0.533	0.012	ENSMUSG00000023452.18	ENSMUSG00000023452.18	Pisd	KNOWN	protein_coding
chr5	32794454	32794503	chr5	32785344	32785358	Rxra_MA0512.2	3.90032	-	chr5	32785049	32786169	peak_272478	gene	32736300	32785646	-	start	37	OverlapStart	0.533	0.012	ENSMUSG00000023452.18	ENSMUSG00000023452.18	Pisd	KNOWN	protein_coding
chr5	124179247	124179296	chr5	124186549	124186563	Rxra_MA0512.2	3.30887	+	chr5	124184950	124188330	peak_286542	gene	124118689	124249760	-	center	2416	PeakInsideFeature	1	0.026	ENSMUSG00000029406.15	ENSMUSG00000029406.15	Pitpnm2	KNOWN	protein_coding
chr5	124179247	124179296	chr5	124187596	124187610	Rxra_MA0512.2	3.83369	+	chr5	124184950	124188330	peak_286542	gene	124118689	124249760	-	center	2416	PeakInsideFeature	1	0.026	ENSMUSG00000029406.15	ENSMUSG00000029406.15	Pitpnm2	KNOWN	protein_coding
chr5	124252778	124252827	chr5	124249103	124249117	Rxra_MA0512.2	7.85428	-	chr5	124247283	124250450	peak_286562	gene	124118689	124249760	-	start	894	OverlapStart	0.782	0.019	ENSMUSG00000029406.15	ENSMUSG00000029406.15	Pitpnm2	KNOWN	protein_coding
chr5	124252778	124252827	chr5	124249120	124249134	Rxra_MA0512.2	2.82989	-	chr5	124247283	124250450	peak_286562	gene	124118689	124249760	-	start	894	OverlapStart	0.782	0.019	ENSMUSG00000029406.15	ENSMUSG00000029406.15	Pitpnm2	KNOWN	protein_coding
chr2	30071787	30071880	chr2	30077469	30077483	Rxra_MA0512.2	6.19381	+	chr2	30077271	30079131	peak_197691	gene	30077683	30091022	+	start	518	OverlapStart	0.778	0.109	ENSMUSG00000026785.14	ENSMUSG00000026785.14	Pkn3	KNOWN	protein_coding
chr2	59156425	59156480	chr2	59160357	59160371	Rxra_MA0512.2	7.09918	+	chr2	59160065	59162506	peak_202116	gene	59160849	59355208	+	start	436	OverlapStart	0.679	0.008	ENSMUSG00000026991.20	ENSMUSG00000026991.20	Pkp4	KNOWN	protein_coding
chr3	129877301	129877350	chr3	129879380	129879394	Rxra_MA0512.2	3.52297	+	chr3	129877960	129879551	peak_239618	gene	129878605	129895825	+	start	150	OverlapStart	0.595	0.055	ENSMUSG00000027999.15	ENSMUSG00000027999.15	Pla2g12a	KNOWN	protein_coding
chr4	138875465	138875514	chr4	138866649	138866663	Rxra_MA0512.2	3.76591	+	chr4	138865193	138866977	peak_264327	gene	138799243	138863482	-	start	2603	Upstream	0	0	ENSMUSG00000041193.15	ENSMUSG00000041193.15	Pla2g5	KNOWN	protein_coding
chr15	79327052	79327101	chr15	79328024	79328038	Rxra_MA0512.2	2.95947	+	chr15	79327159	79328650	peak_135296	gene	79286227	79328390	-	start	486	OverlapStart	0.826	0.029	ENSMUSG00000042632.16	ENSMUSG00000042632.16	Pla2g6	KNOWN	protein_coding
chr8	22765774	22765823	chr8	22757243	22757257	Rxra_MA0512.2	3.39948	+	chr8	22756553	22759429	peak_338669	gene	22757726	22782844	+	start	265	OverlapStart	0.592	0.068	ENSMUSG00000031538.6	ENSMUSG00000031538.6	Plat	KNOWN	protein_coding
chr2	135659972	135660050	chr2	135658502	135658516	Rxra_MA0512.2	4.13789	-	chr2	135658333	135660154	peak_214042	gene	135659010	136014593	+	start	233	OverlapStart	0.628	0.003	ENSMUSG00000039943.16	ENSMUSG00000039943.16	Plcb4	KNOWN	protein_coding
chr2	135659972	135660050	chr2	135658786	135658800	Rxra_MA0512.2	8.27518	+	chr2	135658333	135660154	peak_214042	gene	135659010	136014593	+	start	233	OverlapStart	0.628	0.003	ENSMUSG00000039943.16	ENSMUSG00000039943.16	Plcb4	KNOWN	protein_coding
chr7	27536121	27536170	chr7	27536751	27536765	Rxra_MA0512.2	2.83629	+	chr7	27536087	27537575	peak_316620	gene	27531999	27553218	-	end	4832	PeakInsideFeature	1	0.07	ENSMUSG00000003363.15	ENSMUSG00000003363.15	Pld3	KNOWN	protein_coding
chr7	27546417	27546466	chr7	27536751	27536765	Rxra_MA0512.2	2.83629	+	chr7	27536087	27537575	peak_316620	gene	27531999	27553218	-	end	4832	PeakInsideFeature	1	0.07	ENSMUSG00000003363.15	ENSMUSG00000003363.15	Pld3	KNOWN	protein_coding
chr7	27546417	27546466	chr7	27553507	27553521	Rxra_MA0512.2	4.37685	-	chr7	27552192	27553639	peak_316623	gene	27531999	27553218	-	start	303	OverlapStart	0.709	0.048	ENSMUSG00000003363.15	ENSMUSG00000003363.15	Pld3	KNOWN	protein_coding
chr7	45531303	45531352	chr7	45538566	45538580	Rxra_MA0512.2	3.05262	+	chr7	45537915	45539164	peak_318807	gene	45526329	45554229	+	center	1740	PeakInsideFeature	1	0.045	ENSMUSG00000040428.19	ENSMUSG00000040428.19	Plekha4	KNOWN	protein_coding
chr7	100659932	100659981	chr7	100656627	100656641	Rxra_MA0512.2	2.91799	+	chr7	100656467	100657425	peak_327024	gene	100642891	100662414	-	center	4294	PeakInsideFeature	1	0.049	ENSMUSG00000030701.17	ENSMUSG00000030701.17	Plekhb1	KNOWN	protein_coding
chr7	38212383	38212432	chr7	38217529	38217543	Rxra_MA0512.2	4.11862	+	chr7	38217209	38219515	peak_318177	gene	38216971	38228016	-	end	1391	PeakInsideFeature	1	0.209	ENSMUSG00000074170.5	ENSMUSG00000074170.5	Plekhf1	KNOWN	protein_coding
chr7	38212383	38212432	chr7	38217923	38217937	Rxra_MA0512.2	12.4377	+	chr7	38217209	38219515	peak_318177	gene	38216971	38228016	-	end	1391	PeakInsideFeature	1	0.209	ENSMUSG00000074170.5	ENSMUSG00000074170.5	Plekhf1	KNOWN	protein_coding
chr7	38212383	38212432	chr7	38218057	38218071	Rxra_MA0512.2	3.31094	-	chr7	38217209	38219515	peak_318177	gene	38216971	38228016	-	end	1391	PeakInsideFeature	1	0.209	ENSMUSG00000074170.5	ENSMUSG00000074170.5	Plekhf1	KNOWN	protein_coding
chr7	38215414	38215463	chr7	38217529	38217543	Rxra_MA0512.2	4.11862	+	chr7	38217209	38219515	peak_318177	gene	38216971	38228016	-	end	1391	PeakInsideFeature	1	0.209	ENSMUSG00000074170.5	ENSMUSG00000074170.5	Plekhf1	KNOWN	protein_coding
chr7	38215414	38215463	chr7	38217923	38217937	Rxra_MA0512.2	12.4377	+	chr7	38217209	38219515	peak_318177	gene	38216971	38228016	-	end	1391	PeakInsideFeature	1	0.209	ENSMUSG00000074170.5	ENSMUSG00000074170.5	Plekhf1	KNOWN	protein_coding
chr7	38215414	38215463	chr7	38218057	38218071	Rxra_MA0512.2	3.31094	-	chr7	38217209	38219515	peak_318177	gene	38216971	38228016	-	end	1391	PeakInsideFeature	1	0.209	ENSMUSG00000074170.5	ENSMUSG00000074170.5	Plekhf1	KNOWN	protein_coding
chr17	84507106	84507155	chr17	84509257	84509271	Rxra_MA0512.2	13.5566	+	chr17	84508704	84509524	peak_168195	gene	84511894	84622142	+	start	2780	Upstream	0	0	ENSMUSG00000040852.5	ENSMUSG00000040852.5	Plekhh2	KNOWN	protein_coding
chr17	84511038	84511164	chr17	84509257	84509271	Rxra_MA0512.2	13.5566	+	chr17	84508704	84509524	peak_168195	gene	84511894	84622142	+	start	2780	Upstream	0	0	ENSMUSG00000040852.5	ENSMUSG00000040852.5	Plekhh2	KNOWN	protein_coding
chr11	101166827	101166876	chr11	101163071	101163085	Rxra_MA0512.2	4.39312	+	chr11	101162016	101163660	peak_66101	gene	101162678	101171351	-	end	160	OverlapEnd	0.597	0.113	ENSMUSG00000035172.15	ENSMUSG00000035172.15	Plekhh3	KNOWN	protein_coding
chr4	141650170	141650261	chr4	141643723	141643737	Rxra_MA0512.2	3.53894	-	chr4	141641282	141644065	peak_265050	gene	141625733	141664899	-	center	2643	PeakInsideFeature	1	0.071	ENSMUSG00000028917.14	ENSMUSG00000028917.14	Plekhm2	KNOWN	protein_coding
chr4	141650170	141650261	chr4	141643913	141643927	Rxra_MA0512.2	6.04346	+	chr4	141641282	141644065	peak_265050	gene	141625733	141664899	-	center	2643	PeakInsideFeature	1	0.071	ENSMUSG00000028917.14	ENSMUSG00000028917.14	Plekhm2	KNOWN	protein_coding
chr4	141660552	141660601	chr4	141663525	141663539	Rxra_MA0512.2	3.41922	-	chr4	141663032	141664931	peak_265056	gene	141625733	141664899	-	start	918	OverlapStart	0.983	0.048	ENSMUSG00000028917.14	ENSMUSG00000028917.14	Plekhm2	KNOWN	protein_coding
chr4	141672678	141672759	chr4	141663525	141663539	Rxra_MA0512.2	3.41922	-	chr4	141663032	141664931	peak_265056	gene	141625733	141664899	-	start	918	OverlapStart	0.983	0.048	ENSMUSG00000028917.14	ENSMUSG00000028917.14	Plekhm2	KNOWN	protein_coding
chr3	95995933	95995982	chr3	95995424	95995438	Rxra_MA0512.2	4.2937	-	chr3	95993738	95998005	peak_234498	gene	95988428	95996001	-	start	130	OverlapStart	0.53	0.299	ENSMUSG00000015745.9	ENSMUSG00000015745.9	Plekho1	KNOWN	protein_coding
chr17	56282955	56283078	chr17	56287957	56287971	Rxra_MA0512.2	3.98265	-	chr17	56287878	56288645	peak_163853	gene	56278961	56290511	-	start	2250	PeakInsideFeature	1	0.066	ENSMUSG00000024197.9	ENSMUSG00000024197.9	Plin3	KNOWN	protein_coding
chr17	56282955	56283078	chr17	56287996	56288010	Rxra_MA0512.2	3.51205	+	chr17	56287878	56288645	peak_163853	gene	56278961	56290511	-	start	2250	PeakInsideFeature	1	0.066	ENSMUSG00000024197.9	ENSMUSG00000024197.9	Plin3	KNOWN	protein_coding
chr17	56282955	56283078	chr17	56290429	56290443	Rxra_MA0512.2	5.1825	-	chr17	56289440	56291719	peak_163854	gene	56278961	56290511	-	start	68	OverlapStart	0.47	0.093	ENSMUSG00000024197.9	ENSMUSG00000024197.9	Plin3	KNOWN	protein_coding
chr4	147925655	147925704	chr4	147922510	147922524	Rxra_MA0512.2	12.5639	-	chr4	147921926	147923245	peak_265897	gene	147909752	147936767	-	center	674	PeakInsideFeature	1	0.049	ENSMUSG00000019055.15	ENSMUSG00000019055.15	Plod1	KNOWN	protein_coding
chr9	92455140	92455189	chr9	92457429	92457443	Rxra_MA0512.2	11.8141	+	chr9	92457048	92458780	peak_369890	gene	92457372	92492456	+	start	542	OverlapStart	0.813	0.04	ENSMUSG00000032377.8	ENSMUSG00000032377.8	Plscr4	KNOWN	protein_coding
chr6	115991322	115991371	chr6	115995094	115995108	Rxra_MA0512.2	3.73598	+	chr6	115994711	115995447	peak_308943	gene	115954810	115995005	-	start	74	OverlapStart	0.399	0.007	ENSMUSG00000030123.15	ENSMUSG00000030123.15	Plxnd1	KNOWN	protein_coding
chr7	44859495	44859544	chr7	44857508	44857522	Rxra_MA0512.2	2.74168	-	chr7	44856896	44858158	peak_318650	gene	44857138	44862992	+	start	389	OverlapStart	0.808	0.174	ENSMUSG00000002963.17	ENSMUSG00000002963.17	Pnkp	KNOWN	protein_coding
chr7	16945791	16945840	chr7	16946988	16947002	Rxra_MA0512.2	3.11322	+	chr7	16946474	16948375	peak_315730	gene	16944681	16948828	+	center	670	PeakInsideFeature	1	0.458	ENSMUSG00000070802.5	ENSMUSG00000070802.5	Pnmal2	KNOWN	protein_coding
chr7	16945791	16945840	chr7	16948153	16948167	Rxra_MA0512.2	2.80489	+	chr7	16946474	16948375	peak_315730	gene	16944681	16948828	+	center	670	PeakInsideFeature	1	0.458	ENSMUSG00000070802.5	ENSMUSG00000070802.5	Pnmal2	KNOWN	protein_coding
chr7	16945791	16945840	chr7	16950629	16950643	Rxra_MA0512.2	2.82408	+	chr7	16949962	16951623	peak_315731	gene	16944681	16948828	+	end	1964	Downstream	0	0	ENSMUSG00000070802.5	ENSMUSG00000070802.5	Pnmal2	KNOWN	protein_coding
chr7	16959932	16959981	chr7	16950629	16950643	Rxra_MA0512.2	2.82408	+	chr7	16949962	16951623	peak_315731	gene	16944681	16948828	+	end	1964	Downstream	0	0	ENSMUSG00000070802.5	ENSMUSG00000070802.5	Pnmal2	KNOWN	protein_coding
chr12	59061152	59061201	chr12	59067212	59067226	Rxra_MA0512.2	4.55026	+	chr12	59066328	59067300	peak_78781	gene	59066918	59074017	+	start	104	OverlapStart	0.393	0.054	ENSMUSG00000020994.4	ENSMUSG00000020994.4	Pnn	KNOWN	protein_coding
chr12	59068615	59068664	chr12	59067212	59067226	Rxra_MA0512.2	4.55026	+	chr12	59066328	59067300	peak_78781	gene	59066918	59074017	+	start	104	OverlapStart	0.393	0.054	ENSMUSG00000020994.4	ENSMUSG00000020994.4	Pnn	KNOWN	protein_coding
chr8	3507214	3507263	chr8	3516991	3517005	Rxra_MA0512.2	3.09168	+	chr8	3515085	3517687	peak_335574	gene	3515383	3544267	+	start	1003	OverlapStart	0.885	0.08	ENSMUSG00000004565.15	ENSMUSG00000004565.15	Pnpla6	KNOWN	protein_coding
chr6	88855474	88855523	chr6	88855867	88855881	Rxra_MA0512.2	6.38456	-	chr6	88855411	88856094	peak_304031	gene	88842557	88875044	-	center	3048	PeakInsideFeature	1	0.021	ENSMUSG00000033152.13	ENSMUSG00000033152.13	Podxl2	KNOWN	protein_coding
chr6	88858920	88858969	chr6	88855867	88855881	Rxra_MA0512.2	6.38456	-	chr6	88855411	88856094	peak_304031	gene	88842557	88875044	-	center	3048	PeakInsideFeature	1	0.021	ENSMUSG00000033152.13	ENSMUSG00000033152.13	Podxl2	KNOWN	protein_coding
chr1	166400902	166400951	chr1	166410127	166410141	Rxra_MA0512.2	5.11389	-	chr1	166408854	166410363	peak_23048	gene	166384621	166409863	-	start	255	OverlapStart	0.669	0.04	ENSMUSG00000040596.15	ENSMUSG00000040596.15	Pogk	KNOWN	protein_coding
chr11	5831395	5831492	chr11	5836363	5836377	Rxra_MA0512.2	5.7599	-	chr11	5836231	5836456	peak_49166	gene	5827859	5838016	-	start	1673	PeakInsideFeature	1	0.022	ENSMUSG00000020474.11	ENSMUSG00000020474.11	Polm	KNOWN	protein_coding
chr11	5831395	5831492	chr11	5838078	5838092	Rxra_MA0512.2	3.41111	+	chr11	5837194	5838410	peak_49167	gene	5827859	5838016	-	start	214	OverlapStart	0.676	0.081	ENSMUSG00000020474.11	ENSMUSG00000020474.11	Polm	KNOWN	protein_coding
chr4	45026053	45026102	chr4	45018897	45018911	Rxra_MA0512.2	3.11183	-	chr4	45018286	45019348	peak_249217	gene	45018582	45036565	+	start	235	OverlapStart	0.721	0.043	ENSMUSG00000028318.14	ENSMUSG00000028318.14	Polr1e	KNOWN	protein_coding
chr14	70438809	70438858	chr14	70443687	70443701	Rxra_MA0512.2	3.93668	+	chr14	70442795	70443971	peak_118426	gene	70438747	70443471	-	start	88	OverlapStart	0.575	0.143	ENSMUSG00000000776.12	ENSMUSG00000000776.12	Polr3d	KNOWN	protein_coding
chr5	92243303	92243355	chr5	92239831	92239845	Rxra_MA0512.2	8.06083	-	chr5	92239325	92241365	peak_280292	gene	92226678	92256278	-	center	1133	PeakInsideFeature	1	0.069	ENSMUSG00000029410.11	ENSMUSG00000029410.11	Ppef2	KNOWN	protein_coding
chr7	107754011	107754060	chr7	107749406	107749420	Rxra_MA0512.2	9.72188	-	chr7	107747421	107749696	peak_327969	gene	107595206	107748583	+	end	25	OverlapEnd	0.511	0.007	ENSMUSG00000036528.15	ENSMUSG00000036528.15	Ppfibp2	KNOWN	protein_coding
chr6	57539712	57539782	chr6	57535778	57535792	Rxra_MA0512.2	3.37467	-	chr6	57534649	57536478	peak_300123	gene	57506501	57535468	-	start	95	OverlapStart	0.448	0.028	ENSMUSG00000037826.5	ENSMUSG00000037826.5	Ppm1k	KNOWN	protein_coding
chr7	29283831	29283880	chr7	29292543	29292557	Rxra_MA0512.2	5.84264	+	chr7	29290776	29292745	peak_316951	gene	29289307	29293801	+	center	206	PeakInsideFeature	1	0.438	ENSMUSG00000037166.5	ENSMUSG00000037166.5	Ppp1r14a	KNOWN	protein_coding
chr7	29294457	29294506	chr7	29292543	29292557	Rxra_MA0512.2	5.84264	+	chr7	29290776	29292745	peak_316951	gene	29289307	29293801	+	center	206	PeakInsideFeature	1	0.438	ENSMUSG00000037166.5	ENSMUSG00000037166.5	Ppp1r14a	KNOWN	protein_coding
chr15	76675311	76675360	chr15	76679130	76679144	Rxra_MA0512.2	7.14307	-	chr15	76678276	76680138	peak_134669	gene	76671614	76694919	+	center	4059	PeakInsideFeature	1	0.08	ENSMUSG00000033819.15	ENSMUSG00000033819.15	Ppp1r16a	KNOWN	protein_coding
chr15	76675686	76675735	chr15	76679130	76679144	Rxra_MA0512.2	7.14307	-	chr15	76678276	76680138	peak_134669	gene	76671614	76694919	+	center	4059	PeakInsideFeature	1	0.08	ENSMUSG00000033819.15	ENSMUSG00000033819.15	Ppp1r16a	KNOWN	protein_coding
chr15	76683295	76683384	chr15	76679130	76679144	Rxra_MA0512.2	7.14307	-	chr15	76678276	76680138	peak_134669	gene	76671614	76694919	+	center	4059	PeakInsideFeature	1	0.08	ENSMUSG00000033819.15	ENSMUSG00000033819.15	Ppp1r16a	KNOWN	protein_coding
chr2	158667396	158667445	chr2	158666914	158666928	Rxra_MA0512.2	3.39062	+	chr2	158666129	158668959	peak_218288	gene	158665397	158766334	+	start	2147	PeakInsideFeature	1	0.028	ENSMUSG00000037754.13	ENSMUSG00000037754.13	Ppp1r16b	KNOWN	protein_coding
chr2	158667396	158667445	chr2	158668686	158668700	Rxra_MA0512.2	4.93778	+	chr2	158666129	158668959	peak_218288	gene	158665397	158766334	+	start	2147	PeakInsideFeature	1	0.028	ENSMUSG00000037754.13	ENSMUSG00000037754.13	Ppp1r16b	KNOWN	protein_coding
chr15	103531986	103532035	chr15	103537172	103537186	Rxra_MA0512.2	3.70734	-	chr15	103535876	103538881	peak_140571	gene	103530278	103537992	-	start	614	OverlapStart	0.704	0.274	ENSMUSG00000022490.6	ENSMUSG00000022490.6	Ppp1r1a	KNOWN	protein_coding
chr15	103531986	103532035	chr15	103538068	103538082	Rxra_MA0512.2	3.42217	-	chr15	103535876	103538881	peak_140571	gene	103530278	103537992	-	start	614	OverlapStart	0.704	0.274	ENSMUSG00000022490.6	ENSMUSG00000022490.6	Ppp1r1a	KNOWN	protein_coding
chr15	103542223	103542272	chr15	103537172	103537186	Rxra_MA0512.2	3.70734	-	chr15	103535876	103538881	peak_140571	gene	103530278	103537992	-	start	614	OverlapStart	0.704	0.274	ENSMUSG00000022490.6	ENSMUSG00000022490.6	Ppp1r1a	KNOWN	protein_coding
chr15	103542223	103542272	chr15	103538068	103538082	Rxra_MA0512.2	3.42217	-	chr15	103535876	103538881	peak_140571	gene	103530278	103537992	-	start	614	OverlapStart	0.704	0.274	ENSMUSG00000022490.6	ENSMUSG00000022490.6	Ppp1r1a	KNOWN	protein_coding
chr11	94994074	94994123	chr11	94989217	94989231	Rxra_MA0512.2	2.96416	+	chr11	94988877	94991239	peak_64758	gene	94991034	95006899	+	start	976	OverlapStart	0.087	0.013	ENSMUSG00000038976.12	ENSMUSG00000038976.12	Ppp1r9b	KNOWN	protein_coding
chr11	94994074	94994123	chr11	94997845	94997859	Rxra_MA0512.2	5.6507	+	chr11	94997713	94998707	peak_64761	gene	94991034	95006899	+	center	756	PeakInsideFeature	1	0.063	ENSMUSG00000038976.12	ENSMUSG00000038976.12	Ppp1r9b	KNOWN	protein_coding
chr9	101180793	101180842	chr9	101182063	101182077	Rxra_MA0512.2	3.58025	-	chr9	101180191	101182656	peak_371349	gene	101105083	101251795	-	center	2984	PeakInsideFeature	1	0.017	ENSMUSG00000043154.15	ENSMUSG00000043154.15	Ppp2r3a	KNOWN	protein_coding
chr9	101182245	101182294	chr9	101182063	101182077	Rxra_MA0512.2	3.58025	-	chr9	101180191	101182656	peak_371349	gene	101105083	101251795	-	center	2984	PeakInsideFeature	1	0.017	ENSMUSG00000043154.15	ENSMUSG00000043154.15	Ppp2r3a	KNOWN	protein_coding
chr17	46698915	46698964	chr17	46704811	46704825	Rxra_MA0512.2	2.70693	+	chr17	46704580	46705598	peak_162368	gene	46682990	46705002	-	start	87	OverlapStart	0.415	0.019	ENSMUSG00000059409.8	ENSMUSG00000059409.8	Ppp2r5d	KNOWN	protein_coding
chr17	46708337	46708386	chr17	46704811	46704825	Rxra_MA0512.2	2.70693	+	chr17	46704580	46705598	peak_162368	gene	46682990	46705002	-	start	87	OverlapStart	0.415	0.019	ENSMUSG00000059409.8	ENSMUSG00000059409.8	Ppp2r5d	KNOWN	protein_coding
chr7	17009558	17009607	chr7	17002819	17002833	Rxra_MA0512.2	8.40841	-	chr7	17002199	17003861	peak_315747	gene	17004639	17027924	-	end	1609	Downstream	0	0	ENSMUSG00000003099.11	ENSMUSG00000003099.11	Ppp5c	KNOWN	protein_coding
chr7	17009558	17009607	chr7	17003670	17003684	Rxra_MA0512.2	3.27997	+	chr7	17002199	17003861	peak_315747	gene	17004639	17027924	-	end	1609	Downstream	0	0	ENSMUSG00000003099.11	ENSMUSG00000003099.11	Ppp5c	KNOWN	protein_coding
chr7	17031947	17031996	chr7	17025314	17025328	Rxra_MA0512.2	4.21775	+	chr7	17023954	17025361	peak_315753	gene	17004639	17027924	-	start	3267	PeakInsideFeature	1	0.06	ENSMUSG00000003099.11	ENSMUSG00000003099.11	Ppp5c	KNOWN	protein_coding
chr12	16997327	16997376	chr12	17000013	17000027	Rxra_MA0512.2	3.9278	+	chr12	16998571	17001095	peak_73155	gene	16988647	17000408	-	start	575	OverlapStart	0.728	0.156	ENSMUSG00000045679.13	ENSMUSG00000045679.13	Pqlc3	KNOWN	protein_coding
chr12	16999155	16999253	chr12	17000013	17000027	Rxra_MA0512.2	3.9278	+	chr12	16998571	17001095	peak_73155	gene	16988647	17000408	-	start	575	OverlapStart	0.728	0.156	ENSMUSG00000045679.13	ENSMUSG00000045679.13	Pqlc3	KNOWN	protein_coding
chr6	85442572	85442621	chr6	85451039	85451053	Rxra_MA0512.2	3.66949	-	chr6	85451037	85452475	peak_303202	gene	85446809	85451970	-	start	214	OverlapStart	0.649	0.181	ENSMUSG00000030008.9	ENSMUSG00000030008.9	Pradc1	KNOWN	protein_coding
chr6	85450063	85450112	chr6	85451039	85451053	Rxra_MA0512.2	3.66949	-	chr6	85451037	85452475	peak_303202	gene	85446809	85451970	-	start	214	OverlapStart	0.649	0.181	ENSMUSG00000030008.9	ENSMUSG00000030008.9	Pradc1	KNOWN	protein_coding
chr6	85450868	85450917	chr6	85451039	85451053	Rxra_MA0512.2	3.66949	-	chr6	85451037	85452475	peak_303202	gene	85446809	85451970	-	start	214	OverlapStart	0.649	0.181	ENSMUSG00000030008.9	ENSMUSG00000030008.9	Pradc1	KNOWN	protein_coding
chr6	85459266	85459315	chr6	85451039	85451053	Rxra_MA0512.2	3.66949	-	chr6	85451037	85452475	peak_303202	gene	85446809	85451970	-	start	214	OverlapStart	0.649	0.181	ENSMUSG00000030008.9	ENSMUSG00000030008.9	Pradc1	KNOWN	protein_coding
chr6	85459963	85460012	chr6	85451039	85451053	Rxra_MA0512.2	3.66949	-	chr6	85451037	85452475	peak_303202	gene	85446809	85451970	-	start	214	OverlapStart	0.649	0.181	ENSMUSG00000030008.9	ENSMUSG00000030008.9	Pradc1	KNOWN	protein_coding
chr1	161253640	161253689	chr1	161250555	161250569	Rxra_MA0512.2	5.80035	-	chr1	161249590	161252071	peak_22074	gene	161240111	161251219	-	start	389	OverlapStart	0.657	0.147	ENSMUSG00000026701.15	ENSMUSG00000026701.15	Prdx6	KNOWN	protein_coding
chrX	7653161	7653210	chrX	7657525	7657539	Rxra_MA0512.2	4.96455	+	chrX	7656709	7659425	peak_376508	gene	7657259	7668186	+	start	808	OverlapStart	0.797	0.198	ENSMUSG00000031145.15	ENSMUSG00000031145.15	Prickle3	KNOWN	protein_coding
chrX	7666160	7666209	chrX	7657525	7657539	Rxra_MA0512.2	4.96455	+	chrX	7656709	7659425	peak_376508	gene	7657259	7668186	+	start	808	OverlapStart	0.797	0.198	ENSMUSG00000031145.15	ENSMUSG00000031145.15	Prickle3	KNOWN	protein_coding
chr17	47704015	47704064	chr17	47694820	47694834	Rxra_MA0512.2	2.91999	-	chr17	47693908	47695580	peak_162626	gene	47688516	47694736	-	start	8	OverlapStart	0.495	0.133	ENSMUSG00000096549.9	ENSMUSG00000096549.9	Prickle4	KNOWN	protein_coding
chr17	47704015	47704064	chr17	47695147	47695161	Rxra_MA0512.2	5.7377	-	chr17	47693908	47695580	peak_162626	gene	47688516	47694736	-	start	8	OverlapStart	0.495	0.133	ENSMUSG00000096549.9	ENSMUSG00000096549.9	Prickle4	KNOWN	protein_coding
chr17	86164210	86164259	chr17	86166737	86166751	Rxra_MA0512.2	9.47408	+	chr17	86166395	86169343	peak_168536	gene	86167784	86657919	+	start	85	OverlapStart	0.529	0.003	ENSMUSG00000045038.14	ENSMUSG00000045038.14	Prkce	KNOWN	protein_coding
chr2	11168297	11168346	chr2	11172031	11172045	Rxra_MA0512.2	3.40265	-	chr2	11171899	11173652	peak_194272	gene	11172107	11301222	+	start	668	OverlapStart	0.881	0.012	ENSMUSG00000026778.13	ENSMUSG00000026778.13	Prkcq	KNOWN	protein_coding
chr19	31760357	31760406	chr19	31764525	31764539	Rxra_MA0512.2	4.20813	-	chr19	31762372	31765835	peak_187651	gene	30567550	31765033	-	start	930	OverlapStart	0.768	0.002	ENSMUSG00000052920.14	ENSMUSG00000052920.14	Prkg1	KNOWN	protein_coding
chr19	31760357	31760406	chr19	31765286	31765300	Rxra_MA0512.2	2.86281	-	chr19	31762372	31765835	peak_187651	gene	30567550	31765033	-	start	930	OverlapStart	0.768	0.002	ENSMUSG00000052920.14	ENSMUSG00000052920.14	Prkg1	KNOWN	protein_coding
chr8	106231469	106231518	chr8	106226896	106226910	Rxra_MA0512.2	3.81244	-	chr8	106226421	106227606	peak_350098	gene	106210935	106252794	+	center	4851	PeakInsideFeature	1	0.028	ENSMUSG00000060098.11	ENSMUSG00000060098.11	Prmt7	KNOWN	protein_coding
chr7	30545768	30545817	chr7	30552484	30552498	Rxra_MA0512.2	3.75907	+	chr7	30551640	30553448	peak_317182	gene	30539133	30552299	-	start	245	OverlapStart	0.364	0.05	ENSMUSG00000036864.15	ENSMUSG00000036864.15	Proser3	KNOWN	protein_coding
chr11	116481497	116481546	chr11	116489984	116489998	Rxra_MA0512.2	3.81294	+	chr11	116489711	116491044	peak_69481	gene	116470844	116494202	-	start	3825	PeakInsideFeature	1	0.057	ENSMUSG00000015869.16	ENSMUSG00000015869.16	Prpsap1	KNOWN	protein_coding
chr7	127478865	127478968	chr7	127471646	127471660	Rxra_MA0512.2	6.19624	+	chr7	127470337	127472307	peak_331790	gene	127459610	127476759	+	center	3138	PeakInsideFeature	1	0.115	ENSMUSG00000030822.15	ENSMUSG00000030822.15	Prr14	KNOWN	protein_coding
chr11	96944168	96944217	chr11	96935370	96935384	Rxra_MA0512.2	3.3798	+	chr11	96934751	96935517	peak_65163	gene	96928103	96937830	+	center	2168	PeakInsideFeature	1	0.079	ENSMUSG00000047040.9	ENSMUSG00000047040.9	Prr15l	KNOWN	protein_coding
chr7	127921004	127921053	chr7	127922944	127922958	Rxra_MA0512.2	4.15147	-	chr7	127921532	127923732	peak_331893	gene	127925715	127930104	-	end	3083	Downstream	0	0	ENSMUSG00000030800.10	ENSMUSG00000030800.10	Prss8	KNOWN	protein_coding
chr7	127921004	127921053	chr7	127923095	127923109	Rxra_MA0512.2	3.35211	-	chr7	127921532	127923732	peak_331893	gene	127925715	127930104	-	end	3083	Downstream	0	0	ENSMUSG00000030800.10	ENSMUSG00000030800.10	Prss8	KNOWN	protein_coding
chr3	95265608	95265657	chr3	95263555	95263569	Rxra_MA0512.2	12.0993	+	chr3	95263095	95263898	peak_234327	gene	95253673	95282076	-	center	4378	PeakInsideFeature	1	0.028	ENSMUSG00000015711.8	ENSMUSG00000015711.8	Prune	KNOWN	protein_coding
chr13	14615232	14615281	chr13	14613125	14613139	Rxra_MA0512.2	3.37206	+	chr13	14612823	14613669	peak_90387	gene	14613241	14625671	+	start	5	OverlapStart	0.506	0.034	ENSMUSG00000015671.10	ENSMUSG00000015671.10	Psma2	KNOWN	protein_coding
chr8	105931404	105931453	chr8	105937943	105937957	Rxra_MA0512.2	4.03532	-	chr8	105936612	105938525	peak_350033	gene	105935727	105938392	-	center	509	OverlapStart	0.93	0.668	ENSMUSG00000031897.8	ENSMUSG00000031897.8	Psmb10	KNOWN	protein_coding
chr5	21782441	21782490	chr5	21786881	21786895	Rxra_MA0512.2	3.77536	+	chr5	21786307	21787183	peak_270377	gene	21785282	21803787	+	start	1463	PeakInsideFeature	1	0.047	ENSMUSG00000028932.7	ENSMUSG00000028932.7	Psmc2	KNOWN	protein_coding
chr5	21795783	21795918	chr5	21786881	21786895	Rxra_MA0512.2	3.77536	+	chr5	21786307	21787183	peak_270377	gene	21785282	21803787	+	start	1463	PeakInsideFeature	1	0.047	ENSMUSG00000028932.7	ENSMUSG00000028932.7	Psmc2	KNOWN	protein_coding
chr11	101103645	101103702	chr11	101095286	101095300	Rxra_MA0512.2	4.05647	-	chr11	101094995	101096089	peak_66085	gene	101091822	101095436	-	start	106	OverlapStart	0.403	0.122	ENSMUSG00000019303.14	ENSMUSG00000019303.14	Psmc3ip	KNOWN	protein_coding
chr11	80425676	80425725	chr11	80429425	80429439	Rxra_MA0512.2	4.21207	+	chr11	80428094	80429468	peak_61965	gene	80428614	80473248	+	start	167	OverlapStart	0.622	0.019	ENSMUSG00000017428.16	ENSMUSG00000017428.16	Psmd11	KNOWN	protein_coding
chr11	80430428	80430477	chr11	80429425	80429439	Rxra_MA0512.2	4.21207	+	chr11	80428094	80429468	peak_61965	gene	80428614	80473248	+	start	167	OverlapStart	0.622	0.019	ENSMUSG00000017428.16	ENSMUSG00000017428.16	Psmd11	KNOWN	protein_coding
chr7	140876656	140876705	chr7	140881844	140881858	Rxra_MA0512.2	2.78277	+	chr7	140881618	140882643	peak_334410	gene	140881967	140898643	+	start	163	OverlapStart	0.66	0.041	ENSMUSG00000025487.15	ENSMUSG00000025487.15	Psmd13	KNOWN	protein_coding
chr7	140883494	140883543	chr7	140881844	140881858	Rxra_MA0512.2	2.78277	+	chr7	140881618	140882643	peak_334410	gene	140881967	140898643	+	start	163	OverlapStart	0.66	0.041	ENSMUSG00000025487.15	ENSMUSG00000025487.15	Psmd13	KNOWN	protein_coding
chr14	56782365	56782414	chr14	56778662	56778676	Rxra_MA0512.2	9.08608	-	chr14	56777385	56778910	peak_115650	gene	56722440	56778316	-	start	169	OverlapStart	0.61	0.017	ENSMUSG00000021938.11	ENSMUSG00000021938.11	Pspc1	KNOWN	protein_coding
chr13	63544737	63544786	chr13	63543160	63543174	Rxra_MA0512.2	3.48016	-	chr13	63542597	63545695	peak_98759	gene	63508327	63573598	-	center	3184	PeakInsideFeature	1	0.047	ENSMUSG00000021466.11	ENSMUSG00000021466.11	Ptch1	KNOWN	protein_coding
chr19	32760717	32760766	chr19	32756506	32756520	Rxra_MA0512.2	2.65287	-	chr19	32755779	32758354	peak_187841	gene	32757496	32826160	+	start	430	OverlapStart	0.333	0.012	ENSMUSG00000013663.7	ENSMUSG00000013663.7	Pten	KNOWN	protein_coding
chr12	98676415	98676464	chr12	98675132	98675146	Rxra_MA0512.2	4.9186	-	chr12	98674471	98675318	peak_84677	gene	98676740	98737405	-	end	1846	Downstream	0	0	ENSMUSG00000021009.14	ENSMUSG00000021009.14	Ptpn21	KNOWN	protein_coding
chr12	98676599	98676648	chr12	98675132	98675146	Rxra_MA0512.2	4.9186	-	chr12	98674471	98675318	peak_84677	gene	98676740	98737405	-	end	1846	Downstream	0	0	ENSMUSG00000021009.14	ENSMUSG00000021009.14	Ptpn21	KNOWN	protein_coding
chr17	56443468	56443517	chr17	56443402	56443416	Rxra_MA0512.2	4.7646	+	chr17	56442152	56444016	peak_163898	gene	56412430	56476483	-	center	1372	PeakInsideFeature	1	0.029	ENSMUSG00000013236.16	ENSMUSG00000013236.16	Ptprs	KNOWN	protein_coding
chr9	50532630	50532679	chr9	50522866	50522880	Rxra_MA0512.2	2.96812	+	chr9	50521746	50522984	peak_362369	gene	50521617	50528641	-	end	748	PeakInsideFeature	1	0.176	ENSMUSG00000032067.5	ENSMUSG00000032067.5	Pts	KNOWN	protein_coding
chr19	27425149	27425198	chr19	27429908	27429922	Rxra_MA0512.2	3.64822	+	chr19	27429451	27430930	peak_186849	gene	27388701	27429820	-	start	370	OverlapStart	0.249	0.008	ENSMUSG00000041360.7	ENSMUSG00000041360.7	Pum3	KNOWN	protein_coding
chr19	27425149	27425198	chr19	27430054	27430068	Rxra_MA0512.2	2.6799	-	chr19	27429451	27430930	peak_186849	gene	27388701	27429820	-	start	370	OverlapStart	0.249	0.008	ENSMUSG00000041360.7	ENSMUSG00000041360.7	Pum3	KNOWN	protein_coding
chr19	27425748	27425797	chr19	27429908	27429922	Rxra_MA0512.2	3.64822	+	chr19	27429451	27430930	peak_186849	gene	27388701	27429820	-	start	370	OverlapStart	0.249	0.008	ENSMUSG00000041360.7	ENSMUSG00000041360.7	Pum3	KNOWN	protein_coding
chr19	27425748	27425797	chr19	27430054	27430068	Rxra_MA0512.2	2.6799	-	chr19	27429451	27430930	peak_186849	gene	27388701	27429820	-	start	370	OverlapStart	0.249	0.008	ENSMUSG00000041360.7	ENSMUSG00000041360.7	Pum3	KNOWN	protein_coding
chr10	128742806	128742855	chr10	128747865	128747879	Rxra_MA0512.2	7.40333	-	chr10	128747406	128748909	peak_48332	gene	128747878	128766568	+	start	279	OverlapStart	0.686	0.055	ENSMUSG00000064030.14	ENSMUSG00000064030.14	Pym1	KNOWN	protein_coding
chr5	45457528	45457577	chr5	45449862	45449876	Rxra_MA0512.2	5.94826	+	chr5	45449811	45450787	peak_274743	gene	45434020	45450236	-	start	63	OverlapStart	0.435	0.026	ENSMUSG00000015806.12	ENSMUSG00000015806.12	Qdpr	KNOWN	protein_coding
chr5	45457528	45457577	chr5	45450752	45450766	Rxra_MA0512.2	12.7561	-	chr5	45449811	45450787	peak_274743	gene	45434020	45450236	-	start	63	OverlapStart	0.435	0.026	ENSMUSG00000015806.12	ENSMUSG00000015806.12	Qdpr	KNOWN	protein_coding
chr2	26247234	26247283	chr2	26237374	26237388	Rxra_MA0512.2	12.7454	-	chr2	26236779	26237848	peak_196762	gene	26208636	26237525	-	start	212	OverlapStart	0.698	0.026	ENSMUSG00000036327.18	ENSMUSG00000036327.18	Qsox2	KNOWN	protein_coding
chr9	21418138	21418187	chr9	21412335	21412349	Rxra_MA0512.2	4.30562	+	chr9	21411360	21412596	peak_356717	gene	21411836	21420277	+	start	142	OverlapStart	0.615	0.09	ENSMUSG00000002825.6	ENSMUSG00000002825.6	Qtrt1	KNOWN	protein_coding
chr8	11466440	11466489	chr8	11464182	11464196	Rxra_MA0512.2	5.32928	-	chr8	11463588	11464823	peak_336639	gene	11453517	11478710	-	center	1908	PeakInsideFeature	1	0.049	ENSMUSG00000031504.6	ENSMUSG00000031504.6	Rab20	KNOWN	protein_coding
chr14	52269344	52269433	chr14	52279288	52279302	Rxra_MA0512.2	2.76854	-	chr14	52278865	52280098	peak_115010	gene	52261758	52279545	-	start	64	OverlapStart	0.552	0.038	ENSMUSG00000022159.16	ENSMUSG00000022159.16	Rab2b	KNOWN	protein_coding
chr14	52278395	52278444	chr14	52279288	52279302	Rxra_MA0512.2	2.76854	-	chr14	52278865	52280098	peak_115010	gene	52261758	52279545	-	start	64	OverlapStart	0.552	0.038	ENSMUSG00000022159.16	ENSMUSG00000022159.16	Rab2b	KNOWN	protein_coding
chr9	53706547	53706596	chr9	53706456	53706470	Rxra_MA0512.2	2.76009	+	chr9	53705475	53706910	peak_362969	gene	53684109	53706232	-	start	40	OverlapStart	0.528	0.034	ENSMUSG00000055069.3	ENSMUSG00000055069.3	Rab39	KNOWN	protein_coding
chr14	55712206	55712255	chr14	55722164	55722178	Rxra_MA0512.2	2.70142	-	chr14	55721537	55722620	peak_115506	gene	55715872	55722257	-	start	179	OverlapStart	0.665	0.113	ENSMUSG00000040472.14	ENSMUSG00000040472.14	Rabggta	KNOWN	protein_coding
chr15	10488590	10488639	chr15	10486171	10486185	Rxra_MA0512.2	3.15612	+	chr15	10485553	10486671	peak_125755	gene	10486017	10499063	+	start	95	OverlapStart	0.585	0.05	ENSMUSG00000022248.14	ENSMUSG00000022248.14	Rad1	KNOWN	protein_coding
chr8	105795507	105795556	chr8	105799542	105799556	Rxra_MA0512.2	3.88248	+	chr8	105798521	105800204	peak_350001	gene	105768307	105827350	-	center	1534	PeakInsideFeature	1	0.029	ENSMUSG00000037415.5	ENSMUSG00000037415.5	Ranbp10	KNOWN	protein_coding
chr10	117847625	117847674	chr10	117845564	117845578	Rxra_MA0512.2	6.54186	-	chr10	117844935	117846588	peak_46485	gene	117814470	117845935	-	start	174	OverlapStart	0.605	0.032	ENSMUSG00000052681.7	ENSMUSG00000052681.7	Rap1b	KNOWN	protein_coding
chr11	98842579	98842628	chr11	98849339	98849353	Rxra_MA0512.2	11.1452	-	chr11	98849130	98852470	peak_65645	gene	98836784	98853697	+	end	2897	PeakInsideFeature	1	0.197	ENSMUSG00000038020.5	ENSMUSG00000038020.5	Rapgefl1	KNOWN	protein_coding
chr11	98848759	98848808	chr11	98849339	98849353	Rxra_MA0512.2	11.1452	-	chr11	98849130	98852470	peak_65645	gene	98836784	98853697	+	end	2897	PeakInsideFeature	1	0.197	ENSMUSG00000038020.5	ENSMUSG00000038020.5	Rapgefl1	KNOWN	protein_coding
chr13	92134447	92134496	chr13	92131857	92131871	Rxra_MA0512.2	5.79742	+	chr13	92130277	92132313	peak_101838	gene	91880399	92131656	-	start	361	OverlapStart	0.677	0.005	ENSMUSG00000021708.16	ENSMUSG00000021708.16	Rasgrf2	KNOWN	protein_coding
chr2	117346965	117347014	chr2	117342406	117342420	Rxra_MA0512.2	6.76331	-	chr2	117341251	117343829	peak_210542	gene	117279992	117343001	-	start	461	OverlapStart	0.679	0.028	ENSMUSG00000027347.18	ENSMUSG00000027347.18	Rasgrp1	KNOWN	protein_coding
chr3	107337216	107337265	chr3	107334026	107334040	Rxra_MA0512.2	5.64192	+	chr3	107332658	107334312	peak_236651	gene	107325420	107333673	-	start	188	OverlapStart	0.614	0.123	ENSMUSG00000048109.10	ENSMUSG00000048109.10	Rbm15	KNOWN	protein_coding
chr19	4745853	4745946	chr19	4755743	4755757	Rxra_MA0512.2	2.91894	-	chr19	4755530	4757006	peak_183454	gene	4756542	4767065	+	start	274	OverlapStart	0.314	0.044	ENSMUSG00000033760.16	ENSMUSG00000033760.16	Rbm4b	KNOWN	protein_coding
chr4	135445561	135445610	chr4	135436418	135436432	Rxra_MA0512.2	16.5625	+	chr4	135436266	135436619	peak_263394	gene	135412307	135433853	-	start	2589	Upstream	0	0	ENSMUSG00000059713.12	ENSMUSG00000059713.12	Rcan3	KNOWN	protein_coding
chr9	56042895	56042944	chr9	56041681	56041695	Rxra_MA0512.2	3.37131	+	chr9	56041522	56042589	peak_363346	gene	56041844	56061882	+	start	211	OverlapStart	0.698	0.037	ENSMUSG00000032320.7	ENSMUSG00000032320.7	Rcn2	KNOWN	protein_coding
chr9	56050950	56050999	chr9	56041681	56041695	Rxra_MA0512.2	3.37131	+	chr9	56041522	56042589	peak_363346	gene	56041844	56061882	+	start	211	OverlapStart	0.698	0.037	ENSMUSG00000032320.7	ENSMUSG00000032320.7	Rcn2	KNOWN	protein_coding
chr9	56050950	56050999	chr9	56053966	56053980	Rxra_MA0512.2	3.71484	-	chr9	56053164	56054462	peak_363349	gene	56041844	56061882	+	center	1950	PeakInsideFeature	1	0.065	ENSMUSG00000032320.7	ENSMUSG00000032320.7	Rcn2	KNOWN	protein_coding
chr7	45081017	45081066	chr7	45083251	45083265	Rxra_MA0512.2	3.55093	+	chr7	45082308	45083680	peak_318699	gene	45082912	45092221	-	end	82	OverlapEnd	0.56	0.083	ENSMUSG00000019539.11	ENSMUSG00000019539.11	Rcn3	KNOWN	protein_coding
chr18	34847051	34847158	chr18	34840364	34840378	Rxra_MA0512.2	4.47873	-	chr18	34839771	34842544	peak_174068	gene	34840588	34847463	+	start	569	OverlapStart	0.705	0.285	ENSMUSG00000038555.7	ENSMUSG00000038555.7	Reep2	KNOWN	protein_coding
chr13	76015760	76015809	chr13	76018743	76018757	Rxra_MA0512.2	4.20813	+	chr13	76017972	76019217	peak_100137	gene	76001534	76018712	-	start	118	OverlapStart	0.594	0.043	ENSMUSG00000043190.13	ENSMUSG00000043190.13	Rfesd	KNOWN	protein_coding
chr13	76023273	76023322	chr13	76018743	76018757	Rxra_MA0512.2	4.20813	+	chr13	76017972	76019217	peak_100137	gene	76001534	76018712	-	start	118	OverlapStart	0.594	0.043	ENSMUSG00000043190.13	ENSMUSG00000043190.13	Rfesd	KNOWN	protein_coding
chr14	30671507	30671605	chr14	30671367	30671381	Rxra_MA0512.2	8.73557	-	chr14	30671075	30672412	peak_111931	gene	30654359	30691317	+	center	1095	PeakInsideFeature	1	0.036	ENSMUSG00000052395.15	ENSMUSG00000052395.15	Rft1	KNOWN	protein_coding
chr17	56829253	56829302	chr17	56831232	56831246	Rxra_MA0512.2	5.15177	+	chr17	56830877	56831696	peak_163983	gene	56775896	56831008	-	start	278	OverlapStart	0.16	0.002	ENSMUSG00000024206.14	ENSMUSG00000024206.14	Rfx2	KNOWN	protein_coding
chr17	56829549	56829598	chr17	56831232	56831246	Rxra_MA0512.2	5.15177	+	chr17	56830877	56831696	peak_163983	gene	56775896	56831008	-	start	278	OverlapStart	0.16	0.002	ENSMUSG00000024206.14	ENSMUSG00000024206.14	Rfx2	KNOWN	protein_coding
chr13	55369072	55369121	chr13	55371550	55371564	Rxra_MA0512.2	3.37602	-	chr13	55369259	55371986	peak_97266	gene	55369731	55384687	+	start	891	OverlapStart	0.827	0.151	ENSMUSG00000052087.13	ENSMUSG00000052087.13	Rgs14	KNOWN	protein_coding
chr11	116615390	116615439	chr11	116615637	116615651	Rxra_MA0512.2	2.93183	+	chr11	116615564	116618031	peak_69516	gene	116598164	116627019	-	center	4206	PeakInsideFeature	1	0.085	ENSMUSG00000020806.15	ENSMUSG00000020806.15	Rhbdf2	KNOWN	protein_coding
chr5	123128679	123128728	chr5	123132439	123132453	Rxra_MA0512.2	4.92031	+	chr5	123132309	123133819	peak_286274	gene	123103043	123132692	-	start	372	OverlapStart	0.254	0.013	ENSMUSG00000029449.11	ENSMUSG00000029449.11	Rhof	KNOWN	protein_coding
chr5	123141940	123141989	chr5	123132439	123132453	Rxra_MA0512.2	4.92031	+	chr5	123132309	123133819	peak_286274	gene	123103043	123132692	-	start	372	OverlapStart	0.254	0.013	ENSMUSG00000029449.11	ENSMUSG00000029449.11	Rhof	KNOWN	protein_coding
chr7	102236016	102236065	chr7	102245186	102245200	Rxra_MA0512.2	4.49055	-	chr7	102244709	102246146	peak_327504	gene	102239122	102256054	-	center	2161	PeakInsideFeature	1	0.085	ENSMUSG00000073982.11	ENSMUSG00000073982.11	Rhog	KNOWN	protein_coding
chr10	84921269	84921318	chr10	84917548	84917562	Rxra_MA0512.2	6.67749	+	chr10	84916822	84917990	peak_41259	gene	84917615	85016446	+	start	209	OverlapStart	0.321	0.003	ENSMUSG00000035620.14	ENSMUSG00000035620.14	Ric8b	KNOWN	protein_coding
chr10	84922445	84922494	chr10	84917548	84917562	Rxra_MA0512.2	6.67749	+	chr10	84916822	84917990	peak_41259	gene	84917615	85016446	+	start	209	OverlapStart	0.321	0.003	ENSMUSG00000035620.14	ENSMUSG00000035620.14	Ric8b	KNOWN	protein_coding
chr15	6703749	6703798	chr15	6707827	6707841	Rxra_MA0512.2	3.65695	+	chr15	6707450	6709739	peak_125133	gene	6708380	6800398	+	start	214	OverlapStart	0.594	0.015	ENSMUSG00000050310.8	ENSMUSG00000050310.8	Rictor	KNOWN	protein_coding
chr15	6703749	6703798	chr15	6708489	6708503	Rxra_MA0512.2	4.27919	+	chr15	6707450	6709739	peak_125133	gene	6708380	6800398	+	start	214	OverlapStart	0.594	0.015	ENSMUSG00000050310.8	ENSMUSG00000050310.8	Rictor	KNOWN	protein_coding
chr2	145886087	145886136	chr2	145888789	145888803	Rxra_MA0512.2	3.42375	-	chr2	145887916	145889475	peak_215809	gene	145784733	145887616	+	end	1079	Downstream	0	0	ENSMUSG00000001768.15	ENSMUSG00000001768.15	Rin2	KNOWN	protein_coding
chr18	12120958	12121007	chr18	12128359	12128373	Rxra_MA0512.2	3.40218	-	chr18	12128055	12129511	peak_171080	gene	12128849	12157367	+	start	66	OverlapStart	0.455	0.023	ENSMUSG00000024404.6	ENSMUSG00000024404.6	Riok3	KNOWN	protein_coding
chr13	33992915	33992984	chr13	34002078	34002092	Rxra_MA0512.2	7.26041	-	chr13	34001921	34003202	peak_92927	gene	34002362	34035170	+	start	199	OverlapStart	0.656	0.026	ENSMUSG00000021408.14	ENSMUSG00000021408.14	Ripk1	KNOWN	protein_coding
chr16	10894833	10894882	chr16	10890535	10890549	Rxra_MA0512.2	3.3798	+	chr16	10890279	10890987	peak_142235	gene	10835058	10892966	+	end	2333	PeakInsideFeature	1	0.012	ENSMUSG00000037991.9	ENSMUSG00000037991.9	Rmi2	KNOWN	protein_coding
chr11	51644581	51644630	chr11	51636295	51636309	Rxra_MA0512.2	6.12896	+	chr11	51635439	51636721	peak_55799	gene	51623670	51635896	-	start	184	OverlapStart	0.356	0.037	ENSMUSG00000001054.9	ENSMUSG00000001054.9	Rmnd5b	KNOWN	protein_coding
chr11	101463168	101463217	chr11	101464344	101464358	Rxra_MA0512.2	5.75256	-	chr11	101464295	101466360	peak_66156	gene	101464998	101471853	+	start	329	OverlapStart	0.66	0.199	ENSMUSG00000001313.12	ENSMUSG00000001313.12	Rnd2	KNOWN	protein_coding
chr2	51146835	51146923	chr2	51147540	51147554	Rxra_MA0512.2	6.77694	+	chr2	51146144	51149354	peak_201163	gene	51130437	51149111	-	start	1362	OverlapStart	0.924	0.159	ENSMUSG00000017144.8	ENSMUSG00000017144.8	Rnd3	KNOWN	protein_coding
chr2	167489542	167489605	chr2	167492303	167492317	Rxra_MA0512.2	2.90749	+	chr2	167491021	167493482	peak_220241	gene	167492644	167516173	+	start	393	OverlapStart	0.341	0.036	ENSMUSG00000006418.17	ENSMUSG00000006418.17	Rnf114	KNOWN	protein_coding
chr18	20963751	20963800	chr18	20961255	20961269	Rxra_MA0512.2	4.49765	+	chr18	20960970	20962962	peak_172134	gene	20944624	20983848	+	center	2270	PeakInsideFeature	1	0.051	ENSMUSG00000033107.5	ENSMUSG00000033107.5	Rnf125	KNOWN	protein_coding
chr11	58933246	58933295	chr11	58939096	58939110	Rxra_MA0512.2	7.17162	-	chr11	58938217	58939589	peak_57291	gene	58932287	58938916	-	start	13	OverlapStart	0.509	0.105	ENSMUSG00000020496.8	ENSMUSG00000020496.8	Rnf187	KNOWN	protein_coding
chr11	119393037	119393086	chr11	119392213	119392227	Rxra_MA0512.2	3.31766	-	chr11	119392079	119393576	peak_70304	gene	119393099	119487418	+	start	272	OverlapStart	0.319	0.005	ENSMUSG00000070327.14	ENSMUSG00000070327.14	Rnf213	KNOWN	protein_coding
chr11	119393037	119393086	chr11	119392303	119392317	Rxra_MA0512.2	3.65507	-	chr11	119392079	119393576	peak_70304	gene	119393099	119487418	+	start	272	OverlapStart	0.319	0.005	ENSMUSG00000070327.14	ENSMUSG00000070327.14	Rnf213	KNOWN	protein_coding
chr5	146220400	146220476	chr5	146221138	146221152	Rxra_MA0512.2	3.93582	-	chr5	146220596	146221764	peak_290976	gene	146209191	146221555	-	start	375	OverlapStart	0.821	0.078	ENSMUSG00000029634.15	ENSMUSG00000029634.15	Rnf6	KNOWN	protein_coding
chr7	141167395	141167492	chr7	141172461	141172475	Rxra_MA0512.2	2.62479	+	chr7	141172139	141173231	peak_334468	gene	141160325	141172857	-	start	172	OverlapStart	0.658	0.057	ENSMUSG00000038650.15	ENSMUSG00000038650.15	Rnh1	KNOWN	protein_coding
chr9	37429629	37429678	chr9	37421037	37421051	Rxra_MA0512.2	2.7972	-	chr9	37420468	37421496	peak_359699	gene	37415668	37433163	-	center	3433	PeakInsideFeature	1	0.059	ENSMUSG00000032128.14	ENSMUSG00000032128.14	Robo3	KNOWN	protein_coding
chr9	37397106	37397155	chr9	37400685	37400699	Rxra_MA0512.2	3.70393	+	chr9	37398994	37402433	peak_359695	gene	37401896	37414023	+	start	1183	OverlapStart	0.156	0.044	ENSMUSG00000032125.19	ENSMUSG00000032125.19	Robo4	KNOWN	protein_coding
chr9	37397106	37397155	chr9	37401854	37401868	Rxra_MA0512.2	3.38044	+	chr9	37398994	37402433	peak_359695	gene	37401896	37414023	+	start	1183	OverlapStart	0.156	0.044	ENSMUSG00000032125.19	ENSMUSG00000032125.19	Robo4	KNOWN	protein_coding
chr9	37397407	37397456	chr9	37400685	37400699	Rxra_MA0512.2	3.70393	+	chr9	37398994	37402433	peak_359695	gene	37401896	37414023	+	start	1183	OverlapStart	0.156	0.044	ENSMUSG00000032125.19	ENSMUSG00000032125.19	Robo4	KNOWN	protein_coding
chr9	37397407	37397456	chr9	37401854	37401868	Rxra_MA0512.2	3.38044	+	chr9	37398994	37402433	peak_359695	gene	37401896	37414023	+	start	1183	OverlapStart	0.156	0.044	ENSMUSG00000032125.19	ENSMUSG00000032125.19	Robo4	KNOWN	protein_coding
chr16	34676312	34676361	chr16	34667408	34667422	Rxra_MA0512.2	6.80464	+	chr16	34666429	34667935	peak_146833	gene	34649920	34678618	+	center	2913	PeakInsideFeature	1	0.052	ENSMUSG00000022832.10	ENSMUSG00000022832.10	Ropn1	KNOWN	protein_coding
chr9	22462957	22463006	chr9	22467867	22467881	Rxra_MA0512.2	3.9952	-	chr9	22467207	22468823	peak_356958	gene	22448310	22468356	-	start	341	OverlapStart	0.711	0.057	ENSMUSG00000032239.9	ENSMUSG00000032239.9	Rp9	KNOWN	protein_coding
chr9	22475355	22475404	chr9	22467867	22467881	Rxra_MA0512.2	3.9952	-	chr9	22467207	22468823	peak_356958	gene	22448310	22468356	-	start	341	OverlapStart	0.711	0.057	ENSMUSG00000032239.9	ENSMUSG00000032239.9	Rp9	KNOWN	protein_coding
chr14	52139616	52139665	chr14	52133788	52133802	Rxra_MA0512.2	4.81994	+	chr14	52133517	52134343	peak_114988	gene	52110703	52163546	+	center	3194	PeakInsideFeature	1	0.016	ENSMUSG00000057132.15	ENSMUSG00000057132.15	Rpgrip1	KNOWN	protein_coding
chr11	101433090	101433139	chr11	101442392	101442406	Rxra_MA0512.2	9.27699	+	chr11	101441969	101442778	peak_66151	gene	101442297	101445529	+	start	76	OverlapStart	0.595	0.149	ENSMUSG00000063316.13	ENSMUSG00000063316.13	Rpl27	KNOWN	protein_coding
chr11	101436016	101436091	chr11	101442392	101442406	Rxra_MA0512.2	9.27699	+	chr11	101441969	101442778	peak_66151	gene	101442297	101445529	+	start	76	OverlapStart	0.595	0.149	ENSMUSG00000063316.13	ENSMUSG00000063316.13	Rpl27	KNOWN	protein_coding
chr3	130722793	130722842	chr3	130730359	130730373	Rxra_MA0512.2	8.03842	+	chr3	130729497	130730909	peak_239783	gene	130726830	130730398	-	start	195	OverlapStart	0.638	0.253	ENSMUSG00000062006.12	ENSMUSG00000062006.12	Rpl34	KNOWN	protein_coding
chr15	76906125	76906174	chr15	76908244	76908258	Rxra_MA0512.2	8.51904	+	chr15	76908047	76908465	peak_134727	gene	76904070	76906318	+	end	1938	Downstream	0	0	ENSMUSG00000003970.8	ENSMUSG00000003970.8	Rpl8	KNOWN	protein_coding
chr15	76915727	76915776	chr15	76908244	76908258	Rxra_MA0512.2	8.51904	+	chr15	76908047	76908465	peak_134727	gene	76904070	76906318	+	end	1938	Downstream	0	0	ENSMUSG00000003970.8	ENSMUSG00000003970.8	Rpl8	KNOWN	protein_coding
chr12	85142280	85142329	chr12	85151201	85151215	Rxra_MA0512.2	3.34906	-	chr12	85150684	85151713	peak_82940	gene	85135595	85151264	-	start	66	OverlapStart	0.564	0.037	ENSMUSG00000019235.8	ENSMUSG00000019235.8	Rps6kl1	KNOWN	protein_coding
chr12	85148183	85148232	chr12	85151201	85151215	Rxra_MA0512.2	3.34906	-	chr12	85150684	85151713	peak_82940	gene	85135595	85151264	-	start	66	OverlapStart	0.564	0.037	ENSMUSG00000019235.8	ENSMUSG00000019235.8	Rps6kl1	KNOWN	protein_coding
chr2	119035834	119035883	chr2	119034646	119034660	Rxra_MA0512.2	2.78898	-	chr2	119034528	119035557	peak_210877	gene	119034789	119039769	+	start	253	OverlapStart	0.746	0.154	ENSMUSG00000027324.1	ENSMUSG00000027324.1	Rpusd2	KNOWN	protein_coding
chr6	113427968	113428017	chr6	113419079	113419093	Rxra_MA0512.2	6.46576	+	chr6	113418555	113419836	peak_308202	gene	113415318	113419340	-	start	145	OverlapStart	0.613	0.195	ENSMUSG00000051169.14	ENSMUSG00000051169.14	Rpusd3	KNOWN	protein_coding
chr1	74509093	74509142	chr1	74506116	74506130	Rxra_MA0512.2	5.06852	+	chr1	74505522	74506765	peak_9533	gene	74506057	74530842	+	start	86	OverlapStart	0.57	0.029	ENSMUSG00000026174.9	ENSMUSG00000026174.9	Rqcd1	KNOWN	protein_coding
chr1	74509093	74509142	chr1	74506212	74506226	Rxra_MA0512.2	3.76482	+	chr1	74505522	74506765	peak_9533	gene	74506057	74530842	+	start	86	OverlapStart	0.57	0.029	ENSMUSG00000026174.9	ENSMUSG00000026174.9	Rqcd1	KNOWN	protein_coding
chr1	74509093	74509142	chr1	74506292	74506306	Rxra_MA0512.2	9.40106	+	chr1	74505522	74506765	peak_9533	gene	74506057	74530842	+	start	86	OverlapStart	0.57	0.029	ENSMUSG00000026174.9	ENSMUSG00000026174.9	Rqcd1	KNOWN	protein_coding
chr8	104625218	104625267	chr8	104632696	104632710	Rxra_MA0512.2	3.63262	+	chr8	104629277	104632987	peak_349807	gene	104628065	104631321	-	start	189	OverlapStart	0.551	0.628	ENSMUSG00000031880.6	ENSMUSG00000031880.6	Rrad	KNOWN	protein_coding
chr8	104639934	104639983	chr8	104632696	104632710	Rxra_MA0512.2	3.63262	+	chr8	104629277	104632987	peak_349807	gene	104628065	104631321	-	start	189	OverlapStart	0.551	0.628	ENSMUSG00000031880.6	ENSMUSG00000031880.6	Rrad	KNOWN	protein_coding
chr17	32045802	32045947	chr17	32051975	32051989	Rxra_MA0512.2	2.7196	+	chr17	32051277	32053008	peak_160408	gene	32036099	32062865	+	center	2660	PeakInsideFeature	1	0.065	ENSMUSG00000058392.12	ENSMUSG00000058392.12	Rrp1b	KNOWN	protein_coding
chr11	94545599	94545648	chr11	94548466	94548480	Rxra_MA0512.2	7.3459	-	chr11	94548315	94550420	peak_64667	gene	94539797	94549255	-	start	112	OverlapStart	0.447	0.099	ENSMUSG00000039096.10	ENSMUSG00000039096.10	Rsad1	KNOWN	protein_coding
chr10	29492421	29492476	chr10	29494295	29494309	Rxra_MA0512.2	3.55754	-	chr10	29493631	29494494	peak_33120	gene	29453108	29535867	-	center	425	PeakInsideFeature	1	0.01	ENSMUSG00000019880.9	ENSMUSG00000019880.9	Rspo3	KNOWN	protein_coding
chr10	29498224	29498273	chr10	29494295	29494309	Rxra_MA0512.2	3.55754	-	chr10	29493631	29494494	peak_33120	gene	29453108	29535867	-	center	425	PeakInsideFeature	1	0.01	ENSMUSG00000019880.9	ENSMUSG00000019880.9	Rspo3	KNOWN	protein_coding
chr14	52315637	52315686	chr14	52316692	52316706	Rxra_MA0512.2	2.64103	+	chr14	52313881	52316953	peak_115019	gene	52311171	52328762	-	end	4246	PeakInsideFeature	1	0.175	ENSMUSG00000049532.10	ENSMUSG00000049532.10	Sall2	KNOWN	protein_coding
chr2	157142088	157142137	chr2	157134953	157134967	Rxra_MA0512.2	2.77455	+	chr2	157133815	157135672	peak_217896	gene	157097532	157135265	-	start	522	OverlapStart	0.781	0.038	ENSMUSG00000027639.16	ENSMUSG00000027639.16	Samhd1	KNOWN	protein_coding
chr14	57804179	57804228	chr14	57798237	57798251	Rxra_MA0512.2	8.60517	+	chr14	57797504	57799022	peak_115859	gene	57798179	57804980	+	start	84	OverlapStart	0.555	0.124	ENSMUSG00000021963.16	ENSMUSG00000021963.16	Sap18	KNOWN	protein_coding
chr11	57804677	57804726	chr11	57801439	57801453	Rxra_MA0512.2	3.1214	-	chr11	57801049	57802838	peak_57132	gene	57801636	57810217	+	start	307	OverlapStart	0.672	0.14	ENSMUSG00000020519.5	ENSMUSG00000020519.5	Sap30l	KNOWN	protein_coding
chr3	89187218	89187267	chr3	89177727	89177741	Rxra_MA0512.2	9.50095	-	chr3	89177034	89178096	peak_233537	gene	89177472	89182765	+	start	93	OverlapStart	0.588	0.118	ENSMUSG00000028049.15	ENSMUSG00000028049.15	Scamp3	KNOWN	protein_coding
chr19	44248265	44248383	chr19	44246453	44246467	Rxra_MA0512.2	2.80896	-	chr19	44245880	44246807	peak_189724	gene	44203287	44244016	+	end	2327	Downstream	0	0	ENSMUSG00000025202.7	ENSMUSG00000025202.7	Scd3	KNOWN	protein_coding
chr9	45153733	45153782	chr9	45146320	45146334	Rxra_MA0512.2	3.16756	+	chr9	45144849	45146823	peak_361110	gene	45138436	45154152	+	center	458	PeakInsideFeature	1	0.126	ENSMUSG00000046480.5	ENSMUSG00000046480.5	Scn4b	KNOWN	protein_coding
chr2	164422173	164422222	chr2	164423836	164423850	Rxra_MA0512.2	3.16591	+	chr2	164421806	164424724	peak_219413	gene	164424246	164443887	-	end	981	OverlapEnd	0.164	0.024	ENSMUSG00000017009.3	ENSMUSG00000017009.3	Sdc4	KNOWN	protein_coding
chr2	164432837	164432886	chr2	164423836	164423850	Rxra_MA0512.2	3.16591	+	chr2	164421806	164424724	peak_219413	gene	164424246	164443887	-	end	981	OverlapEnd	0.164	0.024	ENSMUSG00000017009.3	ENSMUSG00000017009.3	Sdc4	KNOWN	protein_coding
chr2	164432837	164432886	chr2	164436313	164436327	Rxra_MA0512.2	7.25647	+	chr2	164435872	164437320	peak_219418	gene	164424246	164443887	-	center	2530	PeakInsideFeature	1	0.074	ENSMUSG00000017009.3	ENSMUSG00000017009.3	Sdc4	KNOWN	protein_coding
chr16	17134721	17134770	chr16	17132675	17132689	Rxra_MA0512.2	8.71165	-	chr16	17131524	17132845	peak_143296	gene	17130137	17132383	-	start	199	OverlapStart	0.65	0.382	ENSMUSG00000022769.7	ENSMUSG00000022769.7	Sdf2l1	KNOWN	protein_coding
chr14	20668369	20668418	chr14	20673911	20673925	Rxra_MA0512.2	9.81283	+	chr14	20673747	20674961	peak_109600	gene	20674320	20694850	+	start	34	OverlapStart	0.528	0.031	ENSMUSG00000039367.9	ENSMUSG00000039367.9	Sec24c	KNOWN	protein_coding
chr14	20668369	20668418	chr14	20673957	20673971	Rxra_MA0512.2	10.4927	+	chr14	20673747	20674961	peak_109600	gene	20674320	20694850	+	start	34	OverlapStart	0.528	0.031	ENSMUSG00000039367.9	ENSMUSG00000039367.9	Sec24c	KNOWN	protein_coding
chr15	3267909	3267958	chr15	3270922	3270936	Rxra_MA0512.2	3.02989	-	chr15	3269560	3271784	peak_124722	gene	3268546	3280508	+	start	2126	PeakInsideFeature	1	0.186	ENSMUSG00000064373.11	ENSMUSG00000064373.11	Sepp1	KNOWN	protein_coding
chr14	76537429	76537478	chr14	76537031	76537045	Rxra_MA0512.2	2.71538	-	chr14	76536323	76537619	peak_119513	gene	76532813	76556687	-	end	4158	PeakInsideFeature	1	0.054	ENSMUSG00000052584.9	ENSMUSG00000052584.9	Serp2	KNOWN	protein_coding
chr5	123141940	123141989	chr5	123149528	123149542	Rxra_MA0512.2	6.86507	+	chr5	123149402	123151537	peak_286279	gene	123142192	123168629	+	center	4941	PeakInsideFeature	1	0.081	ENSMUSG00000038384.16	ENSMUSG00000038384.16	Setd1b	KNOWN	protein_coding
chr5	123141940	123141989	chr5	123150794	123150808	Rxra_MA0512.2	7.11498	-	chr5	123149402	123151537	peak_286279	gene	123142192	123168629	+	center	4941	PeakInsideFeature	1	0.081	ENSMUSG00000038384.16	ENSMUSG00000038384.16	Setd1b	KNOWN	protein_coding
chr10	80796660	80796709	chr10	80798991	80799005	Rxra_MA0512.2	3.76594	-	chr10	80797515	80799134	peak_40486	gene	80798197	80804924	+	start	127	OverlapStart	0.579	0.139	ENSMUSG00000020211.15	ENSMUSG00000020211.15	Sf3a2	KNOWN	protein_coding
chr12	4819532	4819581	chr12	4817284	4817298	Rxra_MA0512.2	4.57779	+	chr12	4816861	4818055	peak_71436	gene	4817607	4827658	+	start	149	OverlapStart	0.375	0.045	ENSMUSG00000037361.7	ENSMUSG00000037361.7	Sf3b6	KNOWN	protein_coding
chr12	4819827	4819915	chr12	4817284	4817298	Rxra_MA0512.2	4.57779	+	chr12	4816861	4818055	peak_71436	gene	4817607	4827658	+	start	149	OverlapStart	0.375	0.045	ENSMUSG00000037361.7	ENSMUSG00000037361.7	Sf3b6	KNOWN	protein_coding
chr4	127026500	127026549	chr4	127020948	127020962	Rxra_MA0512.2	3.63848	-	chr4	127020920	127022596	peak_261373	gene	127021323	127037013	+	start	435	OverlapStart	0.76	0.081	ENSMUSG00000028820.13	ENSMUSG00000028820.13	Sfpq	KNOWN	protein_coding
chr10	22002451	22002500	chr10	22000828	22000842	Rxra_MA0512.2	8.82106	-	chr10	22000030	22001840	peak_31929	gene	21882183	21999903	+	end	1032	Downstream	0	0	ENSMUSG00000019970.15	ENSMUSG00000019970.15	Sgk1	KNOWN	protein_coding
chr19	32126581	32126630	chr19	32127456	32127470	Rxra_MA0512.2	4.70764	+	chr19	32123948	32127954	peak_187694	gene	32122726	32389714	-	end	3225	PeakInsideFeature	1	0.015	ENSMUSG00000040451.17	ENSMUSG00000040451.17	Sgms1	KNOWN	protein_coding
chr15	81003696	81003745	chr15	81009060	81009074	Rxra_MA0512.2	7.28274	-	chr15	81008323	81010960	peak_135791	gene	81002627	81011736	+	end	2095	PeakInsideFeature	1	0.289	ENSMUSG00000103565.1	ENSMUSG00000103565.1	Sgsm3	KNOWN	protein_coding
chr5	136244536	136244585	chr5	136246027	136246041	Rxra_MA0512.2	7.44243	-	chr5	136243763	136246701	peak_288981	gene	136218146	136246556	-	start	1324	OverlapStart	0.951	0.098	ENSMUSG00000005057.13	ENSMUSG00000005057.13	Sh2b2	KNOWN	protein_coding
chr5	136244536	136244585	chr5	136246680	136246694	Rxra_MA0512.2	4.08433	+	chr5	136243763	136246701	peak_288981	gene	136218146	136246556	-	start	1324	OverlapStart	0.951	0.098	ENSMUSG00000005057.13	ENSMUSG00000005057.13	Sh2b2	KNOWN	protein_coding
chr2	122371405	122371454	chr2	122368568	122368582	Rxra_MA0512.2	3.87552	-	chr2	122368271	122369746	peak_211602	gene	122348891	122369162	-	start	154	OverlapStart	0.604	0.044	ENSMUSG00000033256.14	ENSMUSG00000033256.14	Shf	KNOWN	protein_coding
chr19	59073031	59073080	chr19	59074702	59074716	Rxra_MA0512.2	12.1237	-	chr19	59074476	59076435	peak_192351	gene	58973357	59076069	-	start	614	OverlapStart	0.813	0.016	ENSMUSG00000041362.16	ENSMUSG00000041362.16	Shtn1	KNOWN	protein_coding
chr19	59073031	59073080	chr19	59075771	59075785	Rxra_MA0512.2	2.83066	+	chr19	59074476	59076435	peak_192351	gene	58973357	59076069	-	start	614	OverlapStart	0.813	0.016	ENSMUSG00000041362.16	ENSMUSG00000041362.16	Shtn1	KNOWN	protein_coding
chr8	86738716	86738765	chr8	86746716	86746730	Rxra_MA0512.2	5.06339	+	chr8	86745101	86746816	peak_347224	gene	86724006	86745934	-	start	24	OverlapStart	0.486	0.038	ENSMUSG00000036840.5	ENSMUSG00000036840.5	Siah1a	KNOWN	protein_coding
chr8	86740687	86740736	chr8	86746716	86746730	Rxra_MA0512.2	5.06339	+	chr8	86745101	86746816	peak_347224	gene	86724006	86745934	-	start	24	OverlapStart	0.486	0.038	ENSMUSG00000036840.5	ENSMUSG00000036840.5	Siah1a	KNOWN	protein_coding
chrX	164071097	164071185	chrX	164066284	164066298	Rxra_MA0512.2	3.16832	+	chrX	164066124	164066664	peak_384460	gene	164070704	164076493	-	end	4310	Downstream	0	0	ENSMUSG00000040749.11	ENSMUSG00000040749.11	Siah1b	KNOWN	protein_coding
chrX	164071097	164071185	chrX	164069641	164069655	Rxra_MA0512.2	2.88907	-	chrX	164069062	164070069	peak_384461	gene	164070704	164076493	-	end	1139	Downstream	0	0	ENSMUSG00000040749.11	ENSMUSG00000040749.11	Siah1b	KNOWN	protein_coding
chrX	164071097	164071185	chrX	164076211	164076225	Rxra_MA0512.2	3.0197	-	chrX	164075948	164076775	peak_384462	gene	164070704	164076493	-	start	132	OverlapStart	0.659	0.094	ENSMUSG00000040749.11	ENSMUSG00000040749.11	Siah1b	KNOWN	protein_coding
chr12	82173289	82173338	chr12	82169525	82169539	Rxra_MA0512.2	2.85978	+	chr12	82168746	82171145	peak_82237	gene	82170015	82451782	+	start	70	OverlapStart	0.471	0.004	ENSMUSG00000042700.15	ENSMUSG00000042700.15	Sipa1l1	KNOWN	protein_coding
chr2	129630769	129630818	chr2	129633741	129633755	Rxra_MA0512.2	2.95424	+	chr2	129632665	129634906	peak_212832	gene	129592834	129632228	+	end	1557	Downstream	0	0	ENSMUSG00000037902.18	ENSMUSG00000037902.18	Sirpa	KNOWN	protein_coding
chr2	129631064	129631113	chr2	129633741	129633755	Rxra_MA0512.2	2.95424	+	chr2	129632665	129634906	peak_212832	gene	129592834	129632228	+	end	1557	Downstream	0	0	ENSMUSG00000037902.18	ENSMUSG00000037902.18	Sirpa	KNOWN	protein_coding
chr7	28775383	28775432	chr7	28780566	28780580	Rxra_MA0512.2	2.71658	+	chr7	28780133	28781850	peak_316844	gene	28766734	28788661	+	center	3294	PeakInsideFeature	1	0.078	ENSMUSG00000015149.14	ENSMUSG00000015149.14	Sirt2	KNOWN	protein_coding
chr18	74204995	74205085	chr18	74207973	74207987	Rxra_MA0512.2	5.89147	+	chr18	74207378	74208402	peak_180652	gene	74195298	74207818	-	start	72	OverlapStart	0.43	0.035	ENSMUSG00000036223.15	ENSMUSG00000036223.15	Ska1	KNOWN	protein_coding
chr18	78206122	78206171	chr18	78212281	78212295	Rxra_MA0512.2	5.26413	+	chr18	78211973	78214089	peak_181487	gene	78146939	78209094	-	start	3937	Upstream	0	0	ENSMUSG00000024552.15	ENSMUSG00000024552.15	Slc14a2	KNOWN	protein_coding
chr18	78208480	78208529	chr18	78212281	78212295	Rxra_MA0512.2	5.26413	+	chr18	78211973	78214089	peak_181487	gene	78146939	78209094	-	start	3937	Upstream	0	0	ENSMUSG00000024552.15	ENSMUSG00000024552.15	Slc14a2	KNOWN	protein_coding
chr8	69090945	69090994	chr8	69088514	69088528	Rxra_MA0512.2	3.92615	-	chr8	69088304	69090063	peak_344314	gene	69037710	69089235	-	start	52	OverlapStart	0.529	0.018	ENSMUSG00000036330.12	ENSMUSG00000036330.12	Slc18a1	KNOWN	protein_coding
chr2	102659232	102659281	chr2	102659386	102659400	Rxra_MA0512.2	8.71165	-	chr2	102657812	102659840	peak_208477	gene	102658658	102790784	+	start	168	OverlapStart	0.583	0.008	ENSMUSG00000005089.15	ENSMUSG00000005089.15	Slc1a2	KNOWN	protein_coding
chr11	54009456	54009505	chr11	54002761	54002775	Rxra_MA0512.2	9.12849	+	chr11	54002095	54003549	peak_56360	gene	53983122	54028090	-	center	2784	PeakInsideFeature	1	0.032	ENSMUSG00000020334.6	ENSMUSG00000020334.6	Slc22a4	KNOWN	protein_coding
chr9	64941575	64941624	chr9	64934260	64934274	Rxra_MA0512.2	7.00455	+	chr9	64933876	64934882	peak_365593	gene	64922860	64951607	-	center	2854	PeakInsideFeature	1	0.035	ENSMUSG00000034452.7	ENSMUSG00000034452.7	Slc24a1	KNOWN	protein_coding
chr9	64941575	64941624	chr9	64934539	64934553	Rxra_MA0512.2	4.05705	+	chr9	64933876	64934882	peak_365593	gene	64922860	64951607	-	center	2854	PeakInsideFeature	1	0.035	ENSMUSG00000034452.7	ENSMUSG00000034452.7	Slc24a1	KNOWN	protein_coding
chr9	64941575	64941624	chr9	64934627	64934641	Rxra_MA0512.2	3.38217	-	chr9	64933876	64934882	peak_365593	gene	64922860	64951607	-	center	2854	PeakInsideFeature	1	0.035	ENSMUSG00000034452.7	ENSMUSG00000034452.7	Slc24a1	KNOWN	protein_coding
chr6	94496779	94496828	chr6	94500393	94500407	Rxra_MA0512.2	2.73658	-	chr6	94500001	94500893	peak_305243	gene	94500330	94604672	+	start	117	OverlapStart	0.631	0.005	ENSMUSG00000045100.11	ENSMUSG00000045100.11	Slc25a26	KNOWN	protein_coding
chr10	91128344	91128395	chr10	91124266	91124280	Rxra_MA0512.2	3.34906	-	chr10	91123291	91124584	peak_42363	gene	91116573	91124059	-	start	122	OverlapStart	0.594	0.103	ENSMUSG00000061904.12	ENSMUSG00000061904.12	Slc25a3	KNOWN	protein_coding
chr8	46207346	46207395	chr8	46211231	46211245	Rxra_MA0512.2	2.84032	+	chr8	46210440	46211880	peak_341830	gene	46206796	46211284	-	start	124	OverlapStart	0.586	0.188	ENSMUSG00000031633.4	ENSMUSG00000031633.4	Slc25a4	KNOWN	protein_coding
chr8	46209333	46209382	chr8	46211231	46211245	Rxra_MA0512.2	2.84032	+	chr8	46210440	46211880	peak_341830	gene	46206796	46211284	-	start	124	OverlapStart	0.586	0.188	ENSMUSG00000031633.4	ENSMUSG00000031633.4	Slc25a4	KNOWN	protein_coding
chr10	127183972	127184037	chr10	127180491	127180505	Rxra_MA0512.2	6.27126	-	chr10	127179949	127180868	peak_47957	gene	127172425	127180645	-	start	237	OverlapStart	0.757	0.085	ENSMUSG00000040441.8	ENSMUSG00000040441.8	Slc26a10	KNOWN	protein_coding
chr18	61192952	61193001	chr18	61189931	61189945	Rxra_MA0512.2	5.56041	+	chr18	61189599	61190383	peak_178422	gene	61192918	61211612	-	end	2927	Downstream	0	0	ENSMUSG00000034320.14	ENSMUSG00000034320.14	Slc26a2	KNOWN	protein_coding
chr8	71571051	71571100	chr8	71568437	71568451	Rxra_MA0512.2	5.98913	+	chr8	71568361	71570829	peak_344780	gene	71568926	71586708	+	start	669	OverlapStart	0.771	0.107	ENSMUSG00000031808.6	ENSMUSG00000031808.6	Slc27a1	KNOWN	protein_coding
chr8	71571051	71571100	chr8	71569986	71570000	Rxra_MA0512.2	3.74332	+	chr8	71568361	71570829	peak_344780	gene	71568926	71586708	+	start	669	OverlapStart	0.771	0.107	ENSMUSG00000031808.6	ENSMUSG00000031808.6	Slc27a1	KNOWN	protein_coding
chr10	60731709	60731758	chr10	60732522	60732536	Rxra_MA0512.2	2.92478	+	chr10	60731589	60733117	peak_37005	gene	60712071	60752794	-	center	79	PeakInsideFeature	1	0.038	ENSMUSG00000020100.15	ENSMUSG00000020100.15	Slc29a3	KNOWN	protein_coding
chr4	103213164	103213213	chr4	103215561	103215575	Rxra_MA0512.2	17.7782	+	chr4	103213603	103215823	peak_257230	gene	103170648	103215164	-	start	451	OverlapStart	0.703	0.035	ENSMUSG00000028521.17	ENSMUSG00000028521.17	Slc35d1	KNOWN	protein_coding
chr17	31295517	31295566	chr17	31296126	31296140	Rxra_MA0512.2	2.89503	+	chr17	31294485	31297923	peak_160207	gene	31295482	31350696	+	start	722	OverlapStart	0.71	0.044	ENSMUSG00000024036.15	ENSMUSG00000024036.15	Slc37a1	KNOWN	protein_coding
chr15	96644761	96644831	chr15	96642284	96642298	Rxra_MA0512.2	3.14211	+	chr15	96639702	96643451	peak_139003	gene	96571417	96642913	-	start	1337	OverlapStart	0.856	0.045	ENSMUSG00000023169.14	ENSMUSG00000023169.14	Slc38a1	KNOWN	protein_coding
chr3	90255926	90255975	chr3	90248282	90248296	Rxra_MA0512.2	3.29839	+	chr3	90247631	90249080	peak_233798	gene	90248171	90253612	+	start	184	OverlapStart	0.627	0.167	ENSMUSG00000052310.9	ENSMUSG00000052310.9	Slc39a1	KNOWN	protein_coding
chr2	91068780	91068829	chr2	91070023	91070037	Rxra_MA0512.2	2.66337	+	chr2	91069974	91070967	peak_206846	gene	91061790	91070417	-	start	53	OverlapStart	0.446	0.051	ENSMUSG00000002105.15	ENSMUSG00000002105.15	Slc39a13	KNOWN	protein_coding
chr1	131817815	131817864	chr1	131827375	131827389	Rxra_MA0512.2	4.02868	+	chr1	131827345	131828845	peak_17139	gene	131827492	131848865	+	start	603	OverlapStart	0.902	0.063	ENSMUSG00000013275.9	ENSMUSG00000013275.9	Slc41a1	KNOWN	protein_coding
chr3	153972555	153972604	chr3	153968799	153968813	Rxra_MA0512.2	8.70049	-	chr3	153968468	153969019	peak_243486	gene	153973435	154271722	+	start	4692	Upstream	0	0	ENSMUSG00000028360.9	ENSMUSG00000028360.9	Slc44a5	KNOWN	protein_coding
chr5	31039518	31039567	chr5	31047924	31047938	Rxra_MA0512.2	2.98649	-	chr5	31047783	31049628	peak_272115	gene	31036035	31048924	-	start	219	OverlapStart	0.618	0.089	ENSMUSG00000006641.12	ENSMUSG00000006641.12	Slc5a6	KNOWN	protein_coding
chr5	31039518	31039567	chr5	31048971	31048985	Rxra_MA0512.2	4.43737	-	chr5	31047783	31049628	peak_272115	gene	31036035	31048924	-	start	219	OverlapStart	0.618	0.089	ENSMUSG00000006641.12	ENSMUSG00000006641.12	Slc5a6	KNOWN	protein_coding
chr6	114254371	114254420	chr6	114250485	114250499	Rxra_MA0512.2	3.59437	-	chr6	114250057	114251520	peak_308450	gene	114131240	114249952	+	end	836	Downstream	0	0	ENSMUSG00000030307.8	ENSMUSG00000030307.8	Slc6a11	KNOWN	protein_coding
chr8	106215795	106215844	chr8	106210671	106210685	Rxra_MA0512.2	2.87559	+	chr8	106210052	106211550	peak_350096	gene	106200437	106210933	-	start	132	OverlapStart	0.588	0.084	ENSMUSG00000033106.5	ENSMUSG00000033106.5	Slc7a6os	KNOWN	protein_coding
[truncated: 304 more rows]

## Sheet: overlapping_peaks_for_CHIP
CHIP_peak_chr	CHIP_peak_start	CHIP_peak_end
chr16	31939786	31939835
chr16	31943204	31943253
chr16	31945634	31945745
[truncated: 1,242 more rows]

## Sheet: overlapping_peaks_for_ATAC
ATAC_TFBS_chr	ATAC_TFBS_start	ATAC_TFBS_end	ATAC_TFBS_name	ATAC_TFBS_score	ATAC_TFBS_strand	ATAC_peak_chr	ATAC_peak_start	ATAC_peak_end	ATAC_peak_id	ATAC_feature	ATAC_feat_start	ATAC_feat_end	ATAC_feat_strand	ATAC_feat_anchor	ATAC_distance	ATAC_relative_location	ATAC_feat_ovl_peak	ATAC_peak_ovl_feat	ATAC_ID	ATAC_gene_id	ATAC_gene_name	ATAC_gene_status	ATAC_gene_type
[truncated: 1,251 more rows]

[truncated: 3 more sheets: OV_peaks_annotation, OV_TFs_MEME_analysis, OV_TFs_FIMO]
