# Supplementary material for: Decoding the Effects of Bexarotene treatment on brain of AD-like model mice: Single-Cell Transcriptomics and Chromatin Accessibility Analysis
Source: Research Square preprint supplement (doi:10.21203/rs.3.rs-7201032/v1), 2025-08-13
Supplement: Supplementary file 4 [file d989187d3f8c3d14ba61da51.xlsx]

## Sheet: ATAC_RNA_ChromVar.cor_all
GeneScoreMatrix_name	MotifMatrix_name	cor_atac_chromVar	padj_atac_chromVar	pval_atac_chromVar	Strongest.ChromVar	Strongest.Expression	Is.Cand.Reglator	cor_atac_rna	pval_atac_rna	padj_atac_rna
Irf5	Irf5_635	0.921377	2.12049e-202	2.70471e-205	Microglia	Microglia	Yes	0.976826	3.05767e-05	0.000201806
Emx2	Emx2_535	0.915567	4.65344e-195	5.93551e-198	Astrocytes	Astrocytes	Yes	0.965236	0.000102311	0.000506439
Pax6	Pax6_614	0.906868	5.27528e-185	6.72868e-188	Astrocytes	Astrocytes	Yes	0.960532	0.000149188	0.000703313
Arx	Arx_500	0.899111	7.71668e-177	9.8427e-180	Astrocytes	Astrocytes	Yes	0.377796	0.356149	0.391764
Elf1	Elf1_285	0.870321	1.75189e-151	2.23456e-154	Microglia	Microglia	Yes	0.894729	0.00269114	0.00475755
Dbx2	Dbx2_541	0.868256	6.66027e-150	8.49524e-153	Astrocytes	Astrocytes	Yes	0.977696	2.72772e-05	0.000199854
Ebf1	Ebf1_90	0.861932	3.17837e-145	4.05404e-148	Pericytes/VSMC	Pericytes.VSMC	Yes	0.986356	6.28503e-06	7.77773e-05
Fli1	Fli1_277	0.859668	1.32029e-143	1.68404e-146	Macrophages	Microglia	Yes	0.991168	1.71086e-06	3.85008e-05
Lef1	Lef1_734	0.857491	4.47172e-142	5.70372e-145	Endothelial	Endothelial	Yes	0.745587	0.0337124	0.0457196
Neurod6	Neurod6_786	0.853636	1.98606e-139	2.53324e-142	Neuron	Neuron	Yes	0.982347	1.3571e-05	0.000111961
Foxc1	Foxc1_320	0.84962	9.47019e-137	1.20793e-139	Pericytes/VSMC	Pericytes.VSMC	Yes	0.938665	0.000550641	0.00194691
Pou3f2	Pou3f2_555	0.84135	1.79291e-131	2.28687e-134	Astrocytes	Astrocytes	Yes	0.977429	2.82622e-05	0.000199854
Runx3	Runx3_858	0.841004	2.93378e-131	3.74206e-134	Macrophages	Macrophages	Yes	0.923536	0.00105453	0.00266082
Runx1	Runx1_712	0.838362	1.21906e-129	1.55493e-132	Macrophages	Microglia	Yes	0.967796	8.14959e-05	0.000424636
Irf2	Irf2_636	0.83381	6.41342e-127	8.18038e-130	Microglia	Microglia	Yes	0.984844	8.60419e-06	8.51815e-05
Elf4	Elf4_283	0.828552	7.0643e-124	9.01059e-127	Microglia	Microglia	Yes	0.919776	0.00121435	0.00286239
Irf4	Irf4_632	0.827682	2.20158e-123	2.80813e-126	Microglia	Macrophages	Yes	0.925249	0.000986567	0.00266082
Tbr1	Tbr1_769	0.823085	8.02553e-121	1.02366e-123	Neuron	Neuron	Yes	0.994854	3.39427e-07	1.12011e-05
Zic2	Zic2_225	0.79691	1.56627e-107	1.9978e-110	CPEC/Ependymal	Pericytes.VSMC	Yes	0.862	0.00590898	0.00991507
Maf	Maf_793	0.794918	1.33636e-106	1.70455e-109	Microglia	Microglia	Yes	0.682157	0.0623547	0.0801704
Vsx2	Vsx2_431	0.778976	1.66879e-99	2.12856e-102	Astrocytes	Astrocytes	Yes	-0.073696	0.86232	0.86232
Otx2	Otx2_437	0.775389	5.46987e-98	6.97688e-101	CPEC/Ependymal	CPEC.Ependymal	Yes	0.997395	4.4114e-08	4.36728e-06
Foxf2	Foxf2_308	0.77346	3.47727e-97	4.4353e-100	Endothelial	Endothelial	Yes	0.995971	1.63048e-07	8.07086e-06
Ppard	Ppard_656	0.773342	3.89139e-97	4.96351e-100	Endothelial	Microglia	Yes	0.825946	0.0115214	0.0178221
Irf1	Irf1_631	0.771798	1.68774e-96	2.15273e-99	Microglia	Macrophages	Yes	0.950166	0.000297943	0.00124467
Prdm1	Prdm1_189	0.769947	9.64536e-96	1.23028e-98	Microglia	Microglia	Yes	0.930009	0.000812797	0.00243839
Klf10	Klf10_810	0.768366	4.22012e-95	5.3828e-98	Macrophages	Endothelial	Yes	0.514742	0.19179	0.218244
Rela	Rela_698	0.763922	2.5123e-93	3.20447e-96	Microglia	Microglia	Yes	0.628607	0.0950451	0.113367
Etv6	Etv6_282	0.75662	1.70781e-90	2.17833e-93	Microglia	Microglia	Yes	0.936398	0.000612926	0.00197723
Ets1	Ets1_284	0.756065	2.77646e-90	3.5414e-93	Macrophages	Pericytes.VSMC	Yes	0.92847	0.000866588	0.00246843
Gata2	Gata2_383	0.755349	5.19003e-90	6.61994e-93	Endothelial	Endothelial	Yes	0.973994	4.31176e-05	0.00026679
Tcf7	Tcf7_726	0.753211	3.3178e-89	4.23189e-92	Endothelial	Endothelial	Yes	0.924078	0.0010327	0.00266082
Rfx3	Rfx3_710	0.751197	1.87068e-88	2.38607e-91	Neuron	Astrocytes	Yes	0.640383	0.0871645	0.105235
Klf11	Klf11_798	0.744161	6.92941e-86	8.83854e-89	Macrophages	Endothelial	Yes	0.76808	0.0260127	0.0362712
Prrx2	Prrx2_519	0.737694	1.34474e-83	1.71523e-86	Astrocytes	Astrocytes	Yes	0.725211	0.0417698	0.0558812
Pou3f4	Pou3f4_561	0.735167	1.00979e-82	1.28799e-85	CPEC/Ependymal	Astrocytes	Yes	0.913968	0.00149097	0.00320882
Klf2	Klf2_819	0.732854	6.26256e-82	7.98795e-85	Endothelial	Endothelial	Yes	0.93618	0.000619133	0.00197723
Bsx	Bsx_559	0.731956	1.2654e-81	1.61404e-84	Astrocytes	Astrocytes	Yes	0.864554	0.00559814	0.00955545
Irf6	Irf6_634	0.725004	2.66893e-79	3.40425e-82	Microglia	Microglia	Yes	0.19048	0.651395	0.671751
Msx1	Msx1_543	0.724674	3.42868e-79	4.37332e-82	Astrocytes	CPEC.Ependymal	Yes	0.92279	0.0010851	0.00266082
Nfe2l3	Nfe2l3_871	0.723804	6.61115e-79	8.43259e-82	Oligodendrocytes	Oligodendrocytes	Yes	0.984346	9.47753e-06	8.52978e-05
Lhx2	Lhx2_393	0.721674	3.26941e-78	4.17016e-81	Astrocytes	Astrocytes	Yes	0.923725	0.0010469	0.00266082
Klf6	Klf6_794	0.720679	6.86545e-78	8.75695e-81	Endothelial	Endothelial	Yes	0.79312	0.0188434	0.0270362
Ar	Ar_687	0.718547	3.32484e-77	4.24087e-80	Neuron	Neuron	Yes	0.828235	0.011093	0.0174319
Mafb	Mafb_136	0.710768	9.32201e-75	1.18903e-77	Microglia	Microglia	Yes	0.931728	0.000755381	0.00233696
Pax1	Pax1_855	0.708443	4.84513e-74	6.18001e-77	Oligodendrocytes	Astrocytes	Yes	0.645339	0.0839657	0.102874
Yy1	Yy1_154	0.687392	7.22748e-68	9.21873e-71	Macrophages	Macrophages	Yes	0.1183	0.780248	0.796336
Neurod2	Neurod2_69	0.68501	3.34634e-67	4.26829e-70	Neuron	Neuron	Yes	0.912574	0.00156295	0.00327732
Klf4	Klf4_143	0.684801	3.8265e-67	4.88074e-70	Endothelial	Endothelial	Yes	0.895667	0.00262172	0.00471909
Klf3	Klf3_804	0.684417	4.89069e-67	6.23812e-70	Endothelial	Endothelial	Yes	0.858736	0.00632191	0.0104312
Pou3f3	Pou3f3_540	0.677742	3.28447e-65	4.18938e-68	Neuron	Astrocytes	Yes	0.949953	0.000301738	0.00124467
Foxq1	Foxq1_309	0.669479	5.15813e-63	6.57925e-66	Endothelial	Endothelial	Yes	0.940485	0.00050376	0.00192981
Npas4	Npas4_80	0.666268	3.52155e-62	4.49177e-65	Neuron	Neuron	Yes	0.988786	3.49568e-06	5.22169e-05
Elk4	Elk4_280	0.659185	2.24294e-60	2.86089e-63	Macrophages	Macrophages	Yes	0.671844	0.0680288	0.0856731
Usf2	Usf2_95	0.639924	1.04175e-55	1.32876e-58	Macrophages	Microglia	Yes	0.939255	0.000535154	0.00194691
Nfkb2	Nfkb2_699	0.638899	1.80604e-55	2.30362e-58	Microglia	Macrophages	Yes	-0.32327	0.434773	0.462823
Zic3	Zic3_229	0.637557	3.70228e-55	4.7223e-58	CPEC/Ependymal	Endothelial	Yes	0.91463	0.00145756	0.00320663
Xbp1	Xbp1_103	0.637412	3.99938e-55	5.10125e-58	Macrophages	Endothelial	Yes	0.70605	0.0503223	0.0664255
Myog	Myog_45	0.634196	2.19761e-54	2.80307e-57	Oligodendrocytes	Oligodendrocytes	Yes	-0.207732	0.621563	0.647734
Mef2d	Mef2d_842	0.63372	2.82317e-54	3.60099e-57	Pericytes/VSMC	Pericytes.VSMC	Yes	0.801142	0.016844	0.0245228
Arid5b	Arid5b_8	0.62894	3.40984e-53	4.34928e-56	Endothelial	CPEC.Ependymal	Yes	0.622323	0.099412	0.117164
Foxl2	Foxl2_832	0.628573	4.1222e-53	5.25791e-56	Endothelial	Endothelial	Yes	0.96913	7.18535e-05	0.000417857
Egr3	Egr3_183	0.621197	1.76096e-51	2.24613e-54	Neuron	Macrophages	Yes	0.569604	0.140516	0.161757
Arnt	Arnt_25	0.619679	3.76752e-51	4.80552e-54	Macrophages	Macrophages	Yes	0.449336	0.264028	0.293694
Nfib	Nfib_859	0.618447	6.96114e-51	8.87901e-54	Astrocytes	Endothelial	Yes	0.671248	0.0683654	0.0856731
Gsx1	Gsx1_556	0.618443	6.97543e-51	8.89723e-54	Astrocytes	Astrocytes	Yes	-0.0836016	0.843976	0.852588
Prrx1	Prrx1_455	0.612659	1.20226e-49	1.5335e-52	Astrocytes	Pericytes.VSMC	Yes	0.937518	0.000581605	0.00197723
Irf9	Irf9_629	0.604664	5.59016e-48	7.1303e-51	Microglia	Endothelial	Yes	0.919112	0.00124414	0.00286441
Nfia	Nfia_862	0.604139	7.16571e-48	9.13993e-51	Astrocytes	Astrocytes	Yes	0.881133	0.00383334	0.0066579
Mef2c	Mef2c_638	0.599899	5.23554e-47	6.67798e-50	Pericytes/VSMC	Microglia	Yes	0.902096	0.00217719	0.00431084
Sox2	Sox2_750	0.590819	3.35703e-45	4.28192e-48	Oligodendrocytes	Astrocytes	Yes	0.89645	0.00256471	0.00470198
Nfkb1	Nfkb1_701	0.589135	7.15583e-45	9.12734e-48	Microglia	Microglia	Yes	0.897569	0.00248461	0.00464106
Rfx4	Rfx4_706	0.585863	3.07804e-44	3.92607e-47	Neuron	Astrocytes	Yes	0.912079	0.001589	0.00327732
Msc	Msc_43	0.583728	7.90168e-44	1.00787e-46	Neuron	Pericytes.VSMC	Yes	0.814947	0.0137253	0.020588
Zic5	Zic5_195	0.581285	2.30446e-43	2.93937e-46	CPEC/Ependymal	Endothelial	Yes	0.818924	0.0129002	0.019648
Crem	Crem_134	0.572664	9.3728e-42	1.19551e-44	Macrophages	Endothelial	Yes	0.645019	0.0841699	0.102874
Nfatc4	Nfatc4_857	0.569606	3.4001e-41	4.33687e-44	CPEC/Ependymal	Pericytes.VSMC	Yes	0.917881	0.00130058	0.0029263
Cebpe	Cebpe_125	0.567044	9.90132e-41	1.26292e-43	Macrophages	Microglia	Yes	0.292945	0.481343	0.506947
Lmx1a	Lmx1a_456	0.565066	2.24568e-40	2.86439e-43	CPEC/Ependymal	CPEC.Ependymal	Yes	0.988579	3.69211e-06	5.22169e-05
Sox13	Sox13_749	0.56381	3.76746e-40	4.80544e-43	Endothelial	Endothelial	Yes	0.922384	0.00110196	0.00266082
Klf15	Klf15_806	0.55714	5.66153e-39	7.22134e-42	CPEC/Ependymal	Astrocytes	Yes	0.984909	8.49552e-06	8.51815e-05
Sp1	Sp1_142	0.548879	1.49307e-37	1.90442e-40	Macrophages	Pericytes.VSMC	Yes	0.77592	0.0236131	0.0333957
Pou2f1	Pou2f1_619	0.546616	3.60192e-37	4.59428e-40	CPEC/Ependymal	Astrocytes	Yes	0.500391	0.206619	0.232446
Rel	Rel_697	0.543546	1.17715e-36	1.50147e-39	Endothelial	Microglia	Yes	0.968546	7.59739e-05	0.000417857
Smad3	Smad3_723	0.542559	1.7178e-36	2.19107e-39	Microglia	Microglia	Yes	0.762702	0.0277427	0.0381462
Etv3	Etv3_267	0.539429	5.6514e-36	7.20842e-39	Macrophages	Microglia	Yes	0.901397	0.00222291	0.00431507
Barhl2	Barhl2_492	0.528996	2.73674e-34	3.49074e-37	Astrocytes	Astrocytes	Yes	0.366864	0.371358	0.399613
Relb	Relb_856	0.527643	4.48185e-34	5.71664e-37	CPEC/Ependymal	Macrophages	Yes	0.899943	0.00232014	0.0044172
Cebpa	Cebpa_115	0.519711	7.73422e-33	9.86507e-36	Macrophages	Microglia	Yes	0.940363	0.000506819	0.00192981
Zic4	Zic4_187	0.513452	6.94415e-32	8.85733e-35	CPEC/Ependymal	Pericytes.VSMC	Yes	0.853815	0.00697866	0.0111433
Hmga2	Hmga2_14	0.512209	1.06827e-31	1.36259e-34	Astrocytes	Oligodendrocytes	Yes	-0.373293	0.36238	0.394237
Setbp1	Setbp1_12	0.511915	1.18234e-31	1.50808e-34	Neuron	Neuron	Yes	0.854779	0.00684674	0.0111119
Spic	Spic_269	0.511365	1.42942e-31	1.82323e-34	Microglia	Macrophages	Yes	0.589347	0.124185	0.144639
Atf3	Atf3_110	0.51083	1.71835e-31	2.19177e-34	Macrophages	Microglia	Yes	0.697593	0.0544053	0.0708701
Egr4	Egr4_234	0.509992	2.2921e-31	2.92359e-34	Neuron	Neuron	Yes	0.806382	0.0156129	0.0230698
Cebpg	Cebpg_129	0.50709	6.17385e-31	7.87481e-34	Macrophages	Microglia	Yes	0.908792	0.00176946	0.00357504
Bhlhe22	Bhlhe22_42	0.506369	7.88588e-31	1.00585e-33	Neuron	Pericytes.VSMC	Yes	0.959294	0.00016352	0.000735841
Tead4	Tead4_868	0.502896	2.54269e-30	3.24322e-33	CPEC/Ependymal	Endothelial	Yes	0.9283	0.000872679	0.00246843
Sox18	Sox18_740	0.502216	3.19304e-30	4.07275e-33	Endothelial	Endothelial	Yes	0.990782	1.94448e-06	3.85008e-05

## Sheet: TF.chromVar.matrix
	Astrocytes	Endothelial	Macrophages	Microglia	Neuron	Oligodendrocytes
Emx2	7.44687	-2.05772	-2.62742	-3.85736	-1.05328	-0.616245
Pax6	6.00629	-1.60911	-2.0616	-2.91948	-1.10182	-0.662128
Dbx2	4.1597	-0.922694	-1.33099	-2.18388	-0.842323	-0.037145
Pou3f2	5.52742	-1.61963	-2.30091	-3.30992	-0.455039	-0.479561
Prrx2	7.45405	-1.99321	-2.54697	-3.69315	-1.18995	-0.684369
Pou3f4	4.00501	-0.979698	-2.05396	-2.91307	-1.18886	0.179899
Bsx	5.27318	-0.640791	-1.56752	-2.40374	-1.67279	-0.546026
Msx1	6.01459	-0.790607	-1.91461	-3.03928	-1.37767	-0.782705
Lhx2	7.45405	-1.99321	-2.54697	-3.69315	-1.18995	-0.684369
Nfib	4.77563	-1.60826	-3.96683	-4.19288	-0.522953	0.901476
Prrx1	6.42256	-1.90911	-2.52529	-3.64332	-0.50094	-0.547518
Nfia	4.77563	-1.60826	-3.96683	-4.19288	-0.522953	0.901476
Zic5	0.781422	-0.111587	-1.14024	-0.225115	-1.03342	-0.399234
Nfatc4	0.794164	0.401331	-0.725817	-1.63114	-0.746483	-0.489694
Lmx1a	3.1019	-0.409463	-1.04329	-1.82646	-2.18066	-0.275173
Pou2f1	4.31707	-1.17502	-2.19621	-2.89921	-1.03867	-0.163154
Ebf1	-0.227325	1.68259	-1.89073	-1.84358	-0.542077	-1.28868
Lef1	0.269284	6.89893	-1.49467	-2.77583	-2.89587	-1.00294
Foxc1	-1.42557	4.98734	0.0411361	-0.396933	-3.53293	0.146882
Zic2	-0.235235	1.38612	-1.12441	-1.03761	-0.90543	-0.59099
Foxf2	-0.956013	4.25248	-0.223525	-0.77165	-3.30461	0.872037
Ppard	-0.0996445	2.15947	-0.274586	0.88973	-4.30822	0.24496
Gata2	-3.48999	2.84146	0.237459	1.18271	0.265527	0.207217
Tcf7	0.247427	3.42406	-0.178663	-0.736533	-2.41304	-0.116572
Klf2	-2.34019	5.15379	4.69445	0.810803	-3.0022	0.208902
Klf6	-2.34019	5.15379	4.69445	0.810803	-3.0022	0.208902
Klf4	-2.45821	5.22572	3.5546	0.242393	-2.83303	0.389422
Klf3	-2.34019	5.15379	4.69445	0.810803	-3.0022	0.208902
Foxq1	-0.755886	3.64554	-0.193463	-0.697748	-3.16022	1.39406
Zic3	-0.706323	1.41718	-1.42688	-1.18563	-0.430886	-0.560937
Arid5b	-0.570534	0.505284	0.0763894	-0.19194	0.105993	0.428471
Foxl2	-0.693921	4.65614	-0.309657	-0.76155	-4.10652	1.31521
Sox13	-0.158924	4.41531	-1.53851	-2.44863	-2.78339	3.55357
Rel	-0.903456	2.45548	1.24091	2.16583	-2.91902	-2.26537
Zic4	-0.114424	0.980477	-1.40936	-1.50911	-0.0478938	-0.744793
Tead4	-0.820995	1.65198	-3.2333	-4.27433	-0.236705	-1.11538
Sox18	-0.367533	4.23837	-1.32651	-2.31974	-2.97637	3.3245
Fli1	-1.9885	4.01591	7.77187	6.43645	-4.69625	-3.04505
Runx3	-1.47532	-0.489626	6.17262	4.68912	-2.20769	-0.645372
Runx1	-1.47532	-0.489626	6.17262	4.68912	-2.20769	-0.645372
Otx2	-0.998479	-0.297412	1.70946	1.63195	-2.20058	-1.06029
Klf10	-0.0971512	2.43873	3.02693	0.571375	-2.56294	0.636451
Ets1	-2.11385	4.112	7.70581	6.48871	-4.70991	-3.00462
Klf11	-0.835946	2.72368	3.638	0.898078	-2.26323	0.315023
Elk4	-0.859464	2.04384	5.07747	2.9952	-2.18555	-1.84035
Usf2	-1.04339	0.393277	3.01971	2.38741	-2.19283	0.34204
Xbp1	-1.06318	0.953794	1.96561	0.77256	-0.58751	0.248332
Crem	-0.715285	1.04916	2.20746	0.693959	-1.02895	0.466972
Sp1	-0.740543	1.84714	2.69811	0.527067	-0.614904	-0.405057
Etv3	-1.60822	3.21146	6.63455	5.49766	-3.8612	-2.47693
Cebpa	0.0274648	-0.183803	1.64028	0.775744	-0.300796	-0.348573
Atf3	-1.30189	0.700444	2.38654	0.670615	-0.198272	0.49674
Cebpg	-0.633116	-0.543647	2.51847	1.87697	0.0812012	-0.685321
Irf5	-0.731475	0.383806	2.85218	3.6875	-1.65327	-1.58045
Elf1	-5.57674	4.75779	13.3134	17.9624	-8.28141	-6.18096
Irf2	-0.857354	0.791605	4.40914	5.4514	-2.96059	-1.99163
Elf4	-2.72547	3.23991	9.67868	10.3027	-5.93502	-3.45894
Irf4	-0.939875	0.251518	3.74916	5.31024	-2.38397	-1.88604
Maf	-1.28746	-1.09212	1.62671	3.8293	-1.10539	-0.226772
Irf1	-0.632464	0.283585	6.08864	9.2301	-5.09972	-3.26454
Prdm1	-0.406237	0.330995	2.90277	3.9732	-1.9339	-1.77983
Rela	-1.19955	2.41953	1.27068	2.95946	-3.00963	-2.92128
Etv6	-2.71148	2.8114	10.1375	11.0199	-6.05344	-3.48429
Mafb	-1.35104	-0.850171	1.16863	3.55741	-1.40022	0.00254896
Irf9	-0.443778	0.434329	2.47716	3.36717	-1.81449	-1.24936
Nfkb1	-1.39946	1.63248	1.43622	3.47797	-2.94519	-2.49116
Smad3	-1.30139	0.327656	-0.427846	1.37317	-0.103728	0.0920834
Relb	-0.274159	1.43449	0.272296	1.55395	-2.28752	-1.96071
Spic	-5.00281	0.923036	12.5464	20.1534	-7.36266	-5.77171
Neurod6	-2.94332	-1.83951	-0.782157	-0.882898	6.67751	-0.926753
Tbr1	-1.59974	-0.660041	0.928105	0.0349034	2.88988	-1.10129
Rfx3	2.1507	-2.01364	-1.17151	-4.06874	4.50052	-1.49122
Ar	-0.247711	0.0756766	-0.863215	-0.876817	1.66697	-0.596865
Neurod2	-2.69672	-1.84431	-0.990597	-0.951938	6.55616	-0.814182
Pou3f3	0.729247	-0.85042	-0.0415538	-1.43609	1.69917	0.192115
Npas4	-0.58587	-0.144217	0.445459	0.158892	1.04599	-0.412364
Mef2d	-3.35947	1.13682	-1.21025	-0.423766	2.84167	-2.56769
Egr3	-1.82211	-0.0721381	0.671523	-0.93542	4.93817	-1.26078
Mef2c	-3.31366	0.898171	-1.0267	0.128657	3.07281	-3.07039
Rfx4	2.96418	-2.52871	-1.96945	-5.36034	5.32082	-1.7781
Msc	-2.70576	-1.47047	-1.12768	-1.51478	6.61483	-0.915782
Klf15	0.488878	-0.435358	-1.31369	-1.64295	0.663789	0.49419
Setbp1	-0.00328027	-0.182156	-0.0581553	-0.503529	0.731378	-0.0604756
Egr4	-1.34224	0.350929	0.709297	-0.838201	3.61557	-0.941255
Bhlhe22	-2.96135	-2.19311	-1.18348	-1.15585	7.46532	-0.784018
Nfe2l3	-0.608752	-0.325023	0.420687	0.120081	-0.146943	1.29013
Pax1	0.272451	-0.309197	-0.0416951	-0.233622	-0.127806	0.456579
Sox2	2.27473	2.05346	-2.22001	-2.99044	-2.8238	3.42591

## Sheet: TF.inferred_exp.matrix
	Astrocytes	Endothelial	Macrophages	Microglia	Neuron	Oligodendrocytes
Emx2	1.73703	0.131527	0.107207	0.107896	0.329085	0.126397
Pax6	1.55536	0.151885	0.188028	0.163417	0.228683	0.173515
Dbx2	1.22325	0.0634924	0.0324792	0.0212943	0.301888	0.093509
Pou3f2	3.49953	0.122344	0.132258	0.060259	1.0656	0.405379
Prrx2	0.433006	0.0807435	0.0686937	0.0494511	0.236979	0.0364253
Pou3f4	0.940629	0.0558516	0.0262312	0.0118115	0.363367	0.200462
Bsx	0.797761	0.19243	0.475417	0.418208	0.278859	0.216106
Msx1	1.05144	0.583389	0.0714684	0.0490217	0.268408	0.131565
Lhx2	1.61061	0.383901	0.383486	0.308004	0.904162	0.147829
Nfib	2.36416	2.7066	0.222703	0.0793164	1.43047	1.68116
Prrx1	0.778959	0.162929	0.14093	0.156966	0.260851	0.177033
Nfia	4.57139	2.59836	1.54174	2.66541	1.67773	3.51927
Zic5	1.01594	1.26229	0.185462	0.180164	0.090506	0.0661635
Nfatc4	0.238396	0.655055	0.274293	0.247712	0.138435	0.0798465
Lmx1a	0.269567	0.158002	0.0665484	0.0533199	0.344098	0.167353
Pou2f1	1.12425	0.991633	0.732536	0.595727	0.623988	0.716614
Ebf1	0.391104	2.35935	0.503154	0.17714	0.581599	0.197084
Lef1	0.379457	1.94328	0.522296	0.109841	0.27024	0.117752
Foxc1	0.538892	2.32582	0.314956	0.223078	0.31577	0.425097
Zic2	1.35358	2.08432	0.321274	0.247436	0.188523	0.0718739
Foxf2	0.156805	1.7863	0.140563	0.0461651	0.221544	0.0668663
Ppard	0.667743	1.42086	1.01916	1.64587	0.39651	1.00106
Gata2	0.233394	2.68298	0.274855	0.704768	0.3234	0.668057
Tcf7	0.500487	1.46302	0.495542	0.140385	0.368787	0.249443
Klf2	0.306187	4.99882	3.20614	1.86861	0.8339	0.32309
Klf6	1.2631	2.2622	1.88178	1.71891	0.964167	1.49808
Klf4	1.32824	2.6692	1.54418	1.58358	0.885248	0.855451
Klf3	1.05368	1.99835	1.77644	1.71916	0.475682	1.64672
Foxq1	0.208874	1.89551	0.178418	0.0420663	0.244226	0.0771446
Zic3	0.2624	1.28251	0.0345326	0.0228092	0.143304	0.166348
Arid5b	0.582327	1.83273	1.43489	1.49622	1.2198	1.56201
Foxl2	0.155142	1.40856	0.375483	0.381939	0.176482	0.089371
Sox13	0.876423	1.69718	0.306758	0.277206	0.247892	0.408609
Rel	0.400903	0.554131	0.992609	0.993951	0.291108	0.465143
Zic4	0.269463	0.0675175	0.0564397	0.0286792	0.11871	0.0468958
Tead4	0.384434	1.0793	0.202181	0.161663	0.328383	0.198494
Sox18	0.286949	3.32533	0.31691	0.451051	0.431304	0.167633
Fli1	0.245612	1.9521	1.70928	2.35076	0.233583	0.122051
Runx3	0.16211	0.255651	1.14812	0.579548	0.17468	0.205887
Runx1	0.336166	0.334168	2.04415	2.67081	0.407782	0.182089
Otx2	0.170126	0.112301	0.0880069	0.165428	0.126554	0.0743964
Klf10	1.77217	3.07491	2.60438	2.01303	1.44623	1.96348
Ets1	0.60646	2.73581	1.27562	1.72717	0.437572	0.396919
Klf11	0.975808	2.01544	1.38488	0.973996	0.778193	1.60175
Elk4	0.350298	0.619145	0.735919	0.600606	0.408516	0.364319
Usf2	0.632424	0.671378	0.841678	1.1622	0.416968	0.796734
Xbp1	0.78225	1.42908	1.17472	1.21143	0.765739	1.02112
Crem	0.700171	0.904691	0.828088	0.685526	0.515658	0.650461
Sp1	1.81148	2.10543	1.90779	1.52226	1.10791	2.00257
Etv3	0.385049	0.569649	1.00992	1.10163	0.54565	0.550756
Cebpa	1.71174	0.833891	2.02669	3.46483	0.760157	0.456205
Atf3	0.244596	1.14208	1.49751	1.63896	0.278388	0.385982
Cebpg	0.531369	0.883536	0.981755	1.40335	0.43325	0.690384
Irf5	0.126243	0.415787	1.06603	1.89506	0.155017	0.0638151
Elf1	0.698407	0.983364	1.20541	1.34436	0.463567	0.613901
Irf2	1.10119	1.52951	1.757	2.27648	0.714347	0.91856
Elf4	0.216674	0.398457	0.739309	0.764903	0.174233	0.187067
Irf4	0.132859	0.210797	0.764925	0.708128	0.215423	0.114727
Maf	0.427189	0.533932	1.36276	2.40543	0.489934	0.202896
Irf1	0.353663	0.911261	1.20029	1.17324	0.259997	0.258724
Prdm1	0.259279	0.998154	1.05302	1.4467	0.318606	0.124764
Rela	0.421194	0.671504	0.912963	1.00766	0.380086	0.390431
Etv6	1.00126	1.96459	1.9648	3.41679	1.40035	0.746673
Mafb	1.00717	1.03404	1.26165	3.04699	0.596871	0.4547
Irf9	0.243556	0.660542	0.595415	0.54196	0.257614	0.147405
Nfkb1	0.557105	0.758674	0.979263	1.27532	0.522055	0.484114
Smad3	0.893117	1.44817	1.96366	2.78206	1.33913	0.67948
Relb	0.561417	0.865541	1.08085	0.909838	0.379695	0.690272
Spic	0.0486695	0.0538099	0.214007	0.196172	0.162563	0.0231439
Neurod6	0.201076	0.0607206	0.0217935	0.0171984	0.932702	0.0357419
Tbr1	0.188482	0.177926	0.190495	0.223238	0.886227	0.129602
Rfx3	1.29581	0.475037	0.680486	0.439748	1.04086	0.774124
Ar	0.0840365	0.132066	0.0791206	0.0288517	0.23769	0.0213442
Neurod2	0.823543	0.309922	0.392208	0.33646	1.64101	0.326797
Pou3f3	2.80527	0.17727	0.123632	0.0713191	1.31609	2.63125
Npas4	0.306832	0.196044	0.33277	0.247468	1.81355	0.164504
Mef2d	1.16383	1.59062	1.31858	1.5789	1.47255	1.11254
Egr3	0.281218	1.20852	1.53789	1.08987	1.5329	0.479405
Mef2c	0.401301	1.38289	1.23413	2.24156	1.85579	0.213783
Rfx4	1.47514	0.150787	0.398993	0.305066	0.655585	0.500222
Msc	0.217911	0.130656	0.124909	0.127833	0.538399	0.0563722
Klf15	3.13801	0.650254	0.371115	0.152157	0.570811	1.8672
Setbp1	1.05394	0.453552	0.444062	0.505856	1.59048	0.923852
Egr4	0.860662	0.132991	0.0855613	0.039535	1.24184	0.0663467
Bhlhe22	0.216996	0.108661	0.140049	0.0668305	0.723277	0.355943
Nfe2l3	0.088157	0.200164	0.137784	0.108315	0.201633	0.974297
Pax1	0.228503	0.0808553	0.0490049	0.0197492	0.122228	0.207235
Sox2	3.65884	0.115273	0.0925306	0.188516	0.606001	2.1081

## Sheet: TF.rna_gene_exp.matrix
	Astrocytes	Endothelial	Macrophages	Microglia	Neuron	Oligodendrocytes
Emx2	0.619301	0.00910947	0.00628931	0.00537084	0.0566202	0.0241922
Pax6	0.555687	0.0111512	0.00786164	0.00255754	0.168554	0.0146128
Dbx2	1.81645	0.0292131	0.0251572	0.0101023	0.0335366	0.0555285
Pou3f2	0.826096	0.0169625	0.00471698	0.00677749	0.378484	0.0808573
Prrx2	0.041162	0.00125648	0	0.000511509	0.00174216	0.000649456
Pou3f4	0.255638	0.00329826	0.00157233	0.00255754	0.205139	0.0167235
Bsx	0.000393895	0	0	0.000127877	0	0
Msx1	0.0511078	0.102246	0.0110063	0.0016624	0.00391986	0.00503328
Lhx2	1.4583	0.0323543	0.0283019	0.021867	0.174652	0.0339341
Nfib	3.21713	4.19632	0.176101	0.222506	5.10758	1.46826
Prrx1	0.602068	0.0142924	0.00628931	0.00268542	0.00958188	0.15522
Nfia	7.00355	2.57123	0.886792	4.07864	2.53963	3.7571
Zic5	0.18001	0.203864	0.00314465	0.00191816	0.027439	0.00276019
Nfatc4	0.00157558	0.0219884	0	0.000255754	0.00043554	0.000324728
Lmx1a	0.000590842	0.00047118	0	0.000639386	0.00783972	0.000649456
Pou2f1	0.98454	0.417936	0.301887	0.602813	0.77831	0.496509
Ebf1	0.0475628	7.21643	2	0.0253197	0.216463	0.172918
Lef1	0.13097	4.47746	0.191824	0.0104859	0.0309233	0.00957948
Foxc1	0.00275726	0.762368	0.00628931	0.0016624	0.00609756	0.00828057
Zic2	0.117381	0.404115	0.00471698	0.0011509	0.0339721	0.00276019
Foxf2	0.00118168	0.600597	0.00314465	0.000639386	0.0043554	0.00292255
Ppard	0.128311	0.614575	0.264151	0.292455	0.0666376	0.186556
Gata2	0.00167405	0.854091	0.0141509	0.00268542	0.00479094	0.00324728
Tcf7	0.0151649	0.430501	0.116352	0.00127877	0.0235192	0.00860529
Klf2	0.0239291	9.00832	3.61164	0.166368	0.0679443	0.0206202
Klf6	0.160709	2.39783	2.61321	0.669309	0.20601	0.193538
Klf4	0.0732644	2.70206	1.3066	0.113171	0.021777	0.0108784
Klf3	0.277105	1.06973	0.860063	0.968798	0.087108	0.425231
Foxq1	0.0033481	1.63876	0.00628931	0.00268542	0.00522648	0.00308492
Zic3	0.0220581	0.66028	0.00471698	0.000767263	0.0100174	0.00146128
Arid5b	0.293944	1.63845	0.951258	1.09821	0.721254	2.25491
Foxl2	0.000492368	0.224281	0.00157233	0.000255754	0.00087108	0.000649456
Sox13	0.0908912	0.352599	0.00157233	0.0210997	0.0139373	0.0180224
Rel	0.0328902	0.135386	1.09277	1.09936	0.0614111	0.0819938
Zic4	0.0266864	0.00361238	0.00157233	0.00127877	0.0209059	0.00373437
Tead4	0.000689316	0.304853	0.00157233	0.000511509	0.00174216	0.000487092
Sox18	0.003742	1.3961	0.00314465	0.00345269	0.010453	0.00308492
Fli1	0.0862629	3.22962	2.38679	3.60371	0.121951	0.0215944
Runx3	0.000196947	0.000628239	0.325472	0.0028133	0	0.000162364
Runx1	0.0270803	0.0384797	3.53302	5.11739	0.0361498	0.00941711
Otx2	0.00452979	0.00125648	0	0.00191816	0.00522648	0.000649456
Klf10	0.018513	0.213916	0.460692	0.297059	0.167247	0.0274395
Ets1	0.0155588	2.17999	0.968553	0.746931	0.0775261	0.0235428
Klf11	0.0109306	0.228993	0.0361635	0.016624	0.0422474	0.0329599
Elk4	0.0986706	0.632323	0.27044	0.284783	0.10453	0.164962
Usf2	0.354899	0.41825	0.47956	0.576215	0.347125	0.479461
Xbp1	0.275037	0.577352	0.558176	0.555499	0.295296	0.237863
Crem	0.292959	0.469923	0.183962	0.109463	0.181185	0.167722
Sp1	0.124865	0.42092	0.300314	0.302174	0.135017	0.31044
Etv3	0.0490399	0.151092	0.265723	0.236189	0.0945122	0.0983926
Cebpa	0.0511078	0.0166483	0.366352	0.821228	0.0209059	0.0063322
Atf3	0.022452	0.231663	4.31132	1.77801	0.0243902	0.0121773
Cebpg	0.149483	0.573583	0.471698	1.0335	0.182927	0.229096
Irf5	0.011029	0.0468038	0.52044	0.743223	0.00914634	0.00487092
Elf1	0.318956	0.986022	1.16981	0.991688	0.0592334	0.413866
Irf2	0.914525	1.43034	1.54088	2.00678	0.578397	0.584835
Elf4	0.0122107	0.0226166	0.374214	0.474297	0.00304878	0.00340964
Irf4	0.000196947	0.000628239	0.143082	0.0644501	0.00261324	0.000487092
Maf	0.0599705	0.0768023	7.49214	4.41049	0.122822	0.063322
Irf1	0.0340719	0.301869	0.581761	0.545524	0.0304878	0.0189966
Prdm1	0.00206795	0.0746034	0.169811	0.257545	0.00827526	0.00243546
Rela	0.108124	0.32637	0.216981	0.260486	0.0722997	0.207826
Etv6	0.590448	1.03235	1.68082	2.76407	0.43554	0.327975
Mafb	0.0687346	0.0648657	1.00157	5.19118	0.0910279	0.0457867
Irf9	0.0686361	0.46207	0.345912	0.213427	0.0609756	0.0277642
Nfkb1	0.471393	0.650228	1.0283	1.61509	0.229965	0.261893
Smad3	0.100739	0.148422	0.265723	0.733504	0.347125	0.100016
Relb	0.0393895	0.11701	0.136792	0.171483	0.0265679	0.0881637
Spic	0	0.00172766	0.072327	0.000767263	0	0.000649456
Neurod6	0.0117184	0.0106801	0.00943396	0.0102302	0.476916	0.00681929
Tbr1	0.00817331	0.00816711	0.0110063	0.00882353	0.387195	0.00552038
Rfx3	1.48981	0.375059	0.389937	0.66266	1.44599	0.618769
Ar	0.00531758	0.0256008	0.0880503	0.00601023	0.310105	0.0112031
Neurod2	0.00699163	0.00659651	0.00157233	0.00524297	0.317073	0.00552038
Pou3f3	1.26352	0.026229	0.0235849	0.018798	0.420732	0.723981
Npas4	0.00295421	0.0015706	0.00157233	0.00255754	0.105401	0.00113655
Mef2d	0.203053	0.422177	0.393082	0.506522	0.599303	0.180549
Egr3	0.00974889	0.0805717	0.152516	0.0443734	0.633275	0.00876766
Mef2c	0.626194	1.78247	4.64937	10.1639	5.35192	0.126969
Rfx4	2.03772	0.0347102	0.0141509	0.00716113	0.0527003	0.113492
Msc	9.84737e-05	0.00031412	0	0.000127877	0.00783972	0.000324728
Klf15	0.459577	0.0186901	0.0157233	0.00716113	0.0426829	0.220003
Setbp1	0.995864	0.0868541	0.294025	0.413299	2.15767	0.74379
Egr4	0.00758247	0.00628239	0	0.007289	0.277003	0.00552038
Bhlhe22	0.0052191	0.00581121	0.00314465	0.00332481	0.139808	0.0230557
Nfe2l3	0.0139833	0.0227737	0.0125786	0.0253197	0.0557491	0.651892
Pax1	0.0033481	0	0	0.000127877	0.00043554	0.000649456
Sox2	1.86873	0.0345532	0.0235849	0.0175192	0.288328	0.412405
