# Supplementary material for: Decoding the Effects of Bexarotene treatment on brain of AD-like model mice: Single-Cell Transcriptomics and Chromatin Accessibility Analysis
Source: Research Square preprint supplement (doi:10.21203/rs.3.rs-7201032/v1), 2025-08-13
Supplement: Supplementary file 5 [file f4a09ec69b24891d596b7d9d.xlsx]

## Sheet: TF_highlighted_combined
output_prefix	name	motif_id	cluster	total_tfbs	Bexa_mean_score	Bexa_bound	Controls_mean_score	Controls_bound	Bexa_Controls_change	Bexa_Controls_pvalue	Bexa_Controls_highlighted	Consistent with gex	celltype
Dlx2_MA0885.3	Dlx2	MA0885.3	C_Dlx2	3292	0.40668	465	0.41719	474	0.05983	2.57218E-54	TRUE	TRUE	astro
Srebf1_MA0829.1	Srebf1	MA0829.1	C_Srebf1	2227	1.37342	1052	1.44075	1088	-0.07116	1.25005E-52	TRUE	TRUE	astro
Npas4_MA1995.2	Npas4	MA1995.2	C_Npas4	794	1.13757	335	1.1973	354	-0.13012	8.44305E-56	TRUE	TRUE	astro
Ascl2_MA0816.1	Ascl2	MA0816.1	C_Bhlha15	8449	0.55262	2437	0.48719	2146	0.07936	1.21891E-86	TRUE	TRUE	endo
Rfx1_MA0509.1	Rfx1	MA0509.1	C_Rfx1	6444	0.84648	2445	0.75876	2219	0.07237	1.50609E-77	TRUE	TRUE	endo
Neurod2_MA0668.3	Neurod2	MA0668.3	C_Neurod2	8122	0.40587	1648	0.35432	1412	0.06784	4.72210E-75	TRUE	TRUE	endo
Neurod2_MA1993.2	Neurod2	MA1993.2	C_Bhlha15	16321	0.5799	4865	0.51487	4275	0.06726	4.37662E-96	TRUE	TRUE	endo
Olig2_MA1997.2	Olig2	MA1997.2	C_Bhlha15	16321	0.5799	4865	0.51487	4275	0.06726	4.37662E-96	TRUE	TRUE	endo
Klf1_MA0493.1	Klf1	MA0493.1	C_Klf4	15437	1.2369	6627	1.16191	6300	-0.08203	9.89995E-111	TRUE	TRUE	endo
Erg_MA0474.4	Erg	MA0474.4	C_Ets1	19261	0.53342	4704	0.49982	4445	-0.08715	1.84176E-108	TRUE	TRUE	endo
Atf1_MA0604.1	Atf1	MA0604.1	C_Crem	1527	1.55529	815	1.4874	795	-0.09652	1.71386E-60	TRUE	TRUE	endo
Foxj3_MA0851.2	Foxj3	MA0851.2	C_Foxk1	11149	0.26323	1256	0.23835	1141	-0.09955	8.69332E-101	TRUE	TRUE	endo
Zbtb2_MA2340.1	Zbtb2	MA2340.1	C_Zbtb2	6464	1.3908	3674	1.33189	3577	-0.16708	3.83586E-110	TRUE	TRUE	endo
Hic1_MA0739.2	Hic1	MA0739.2	C_Hic1	8994	0.25407	1982	0.23183	1813	0.09338	6.51698E-94	TRUE	TRUE	micro
Ascl2_MA0816.1	Ascl2	MA0816.1	C_Bhlha15	14800	0.30358	3946	0.27972	3649	0.06398	1.33373E-87	TRUE	TRUE	micro
Mitf_MA0620.1	Mitf	MA0620.1	C_Mitf	4692	0.71739	1967	0.70414	1935	-0.09459	5.77014E-85	TRUE	TRUE	micro
Zbtb2_MA2340.1	Zbtb2	MA2340.1	C_Gabpa	8174	0.91771	4477	0.90643	4456	-0.20149	1.11823E-126	TRUE	TRUE	micro
Rfx1_MA0509.1	Rfx1	MA0509.1	C_Rfx1	8115	0.6137	2753	0.60596	2720	0.09775	6.66870E-89	TRUE	TRUE	oligo
Pou2f3_MA0627.1	Pou2f3	MA0627.1	C_Pou2f3	9468	0.23271	1107	0.2322	1116	0.05879	3.00136E-75	TRUE	TRUE	oligo
Erg_MA0474.4	Erg	MA0474.4	C_Ets1	16739	0.49583	4847	0.52392	5244	-0.12914	2.37049E-128	TRUE	TRUE	oligo
Barhl1_MA0877.1	Barhl1	MA0877.1	C_Nkx2-5	4143	0.36817	490	0.3747	498	0.07641	3.81187E-70	TRUE	FALSE	astro
Prrx2_MA0075.2	Prrx2	MA0075.2	C_Alx1	4013	0.37921	459	0.38617	461	0.0676	2.85063E-65	TRUE	FALSE	astro
Alx4_MA0853.2	Alx4	MA0853.2	C_Alx1	3394	0.30104	333	0.30871	348	0.06326	1.62199E-57	TRUE	FALSE	astro
Pdx1_MA0132.1	Pdx1	MA0132.1	C_Pdx1	5775	0.3673	744	0.37678	757	0.06242	9.14491E-72	TRUE	FALSE	astro
NFYA_MA0060.1	NFYA	MA0060.1	C_NFYA	6429	2.58766	4114	2.6093	4111	0.06199	2.71710E-70	TRUE	FALSE	astro
Lhx1_MA1518.3	Lhx1	MA1518.3	C_Alx1	2610	0.32482	278	0.33264	279	0.06046	9.79475E-47	TRUE	FALSE	astro
Dlx5_MA1476.3	Dlx5	MA1476.3	C_Dlx2	3292	0.40668	465	0.41719	474	0.05983	2.57218E-54	TRUE	FALSE	astro
Alx1_MA0854.2	Alx1	MA0854.2	C_Alx1	3020	0.25355	241	0.25975	242	0.05458	4.39250E-53	TRUE	FALSE	astro
Hoxd3_MA0912.1	Hoxd3	MA0912.1	C_Alx1	5425	0.25816	474	0.26676	500	0.05135	4.04787E-64	TRUE	FALSE	astro
Ets1_MA0098.2	Ets1	MA0098.2	C_Ets1	14465	0.75901	4423	0.80051	4695	-0.0449	1.07161E-73	TRUE	FALSE	astro
Erg_MA0474.4	Erg	MA0474.4	C_Ets1	11991	0.73695	3531	0.77991	3769	-0.05253	2.03130E-72	TRUE	FALSE	astro
Foxk1_MA0852.1	Foxk1	MA0852.1	C_Foxk1	12524	0.26054	1184	0.27912	1291	-0.05261	1.39563E-75	TRUE	FALSE	astro
Foxl2_MA1607.2	Foxl2	MA1607.2	C_Foxk1	9248	0.30309	1021	0.32303	1108	-0.05811	6.99737E-77	TRUE	FALSE	astro
Foxj2_MA0614.1	Foxj2	MA0614.1	C_Foxk1	6278	0.37944	895	0.40116	957	-0.06022	1.27393E-72	TRUE	FALSE	astro
Foxj3_MA0851.2	Foxj3	MA0851.2	C_Foxk1	8052	0.32285	978	0.34337	1044	-0.06029	5.15132E-71	TRUE	FALSE	astro
Jun_MA0489.3	Jun	MA0489.3	C_Jun	4221	0.4852	861	0.52436	948	-0.07225	1.20950E-76	TRUE	FALSE	astro
Tcfl5_MA0632.1	Tcfl5	MA0632.1	C_Tcfl5	1074	1.57344	590	1.65466	601	-0.0765	9.60241E-40	TRUE	FALSE	astro
Gabpa_MA0062.2	Gabpa	MA0062.2	C_Gabpa	6498	1.75313	4337	1.84648	4454	-0.07688	3.95661E-80	TRUE	FALSE	astro
Ptf1A_MA1620.2	Ptf1A	MA1620.2	C_Ptf1A	3214	0.44203	596	0.46758	641	-0.08302	8.78337E-66	TRUE	FALSE	astro
FOSJUN_MA0099.2	FOS::JUN	MA0099.2	C_Jun	4606	0.47694	915	0.51572	1009	-0.08476	1.94467E-84	TRUE	FALSE	astro
Mitf_MA0620.1	Mitf	MA0620.1	C_Arntl	2828	1.35278	1303	1.4201	1348	-0.08665	1.24764E-67	TRUE	FALSE	astro
Atf3_MA1988.2	Atf3	MA1988.2	C_Jun	4398	0.49718	912	0.53829	1005	-0.09257	2.39106E-82	TRUE	FALSE	astro
Pax2_MA0067.1	Pax2	MA0067.1	C_Pax2	1631	1.16689	672	1.22302	703	-0.0951	4.15206E-67	TRUE	FALSE	astro
Znf281_MA1630.1	Znf281	MA1630.1	C_Wt1	13447	0.77308	5025	0.69853	4544	0.08335	3.85369E-99	TRUE	FALSE	endo
Atoh1_MA1467.3	Atoh1	MA1467.3	C_Neurod2	4699	0.43166	1036	0.37534	870	0.08249	9.61391E-77	TRUE	FALSE	endo
Tcf3_MA0522.1	Tcf3	MA0522.1	C_Bhlha15	12475	0.552	3666	0.48599	3208	0.07539	6.46040E-94	TRUE	FALSE	endo
Wt1_MA1627.2	Wt1	MA1627.2	C_Wt1	16494	0.9089	7019	0.82829	6413	0.06971	4.35191E-96	TRUE	FALSE	endo
Atoh1_MA0461.3	Atoh1	MA0461.3	C_Atoh1	2594	0.25918	295	0.22134	250	0.0689	5.71426E-54	TRUE	FALSE	endo
Tcf12_MA0521.3	Tcf12	MA0521.3	C_Bhlha15	16321	0.5799	4865	0.51487	4275	0.06726	4.37662E-96	TRUE	FALSE	endo
Twist2_MA0633.3	Twist2	MA0633.3	C_Bhlha15	16321	0.5799	4865	0.51487	4275	0.06726	4.37662E-96	TRUE	FALSE	endo
Klf4_MA0039.2	Klf4	MA0039.2	C_Klf4	23167	1.57945	12771	1.48238	12197	-0.06651	1.51242E-101	TRUE	FALSE	endo
Ets1_MA0098.2	Ets1	MA0098.2	C_Ets1	23006	0.56291	6003	0.52462	5623	-0.07562	6.76867E-109	TRUE	FALSE	endo
Pax4_MA0068.1	Pax4	MA0068.1	C_Pax4	16752	0.26091	2022	0.23387	1791	-0.08819	6.23028E-106	TRUE	FALSE	endo
Gata3_MA0037.5	Gata3	MA0037.5	C_Gata1	5774	0.25183	634	0.22642	542	-0.10025	1.38942E-88	TRUE	FALSE	endo
Hmga1_MA2124.1	Hmga1	MA2124.1	C_Hmga1	14684	0.21133	1374	0.18744	1148	-0.1004	3.02902E-108	TRUE	FALSE	endo
Gata1_MA0035.3	Gata1	MA0035.3	C_Gata1	6810	0.26052	766	0.23608	689	-0.10116	2.20279E-92	TRUE	FALSE	endo
Crem_MA0609.1	Crem	MA0609.1	C_Crem	1858	1.73779	1084	1.65905	1041	-0.10657	3.76673E-67	TRUE	FALSE	endo
Gata4_MA0482.1	Gata4	MA0482.1	C_Gata1	6194	0.26822	740	0.2433	661	-0.10881	1.06412E-100	TRUE	FALSE	endo
Klf12_MA0742.1	Klf12	MA0742.1	C_Klf12	10370	1.70992	5677	1.61587	5467	-0.1142	1.08685E-110	TRUE	FALSE	endo
Foxk1_MA0852.1	Foxk1	MA0852.1	C_Foxk1	16707	0.21761	1512	0.19606	1362	-0.11553	1.64079E-119	TRUE	FALSE	endo
Hoxd8_MA0910.1	Hoxd8	MA0910.1	C_Hoxd8	9182	0.17928	675	0.15753	570	-0.11618	1.14787E-108	TRUE	FALSE	endo
Gabpa_MA0062.2	Gabpa	MA0062.2	C_Zbtb2	8398	1.44622	4937	1.38477	4822	-0.17345	2.44082E-121	TRUE	FALSE	endo
Atoh1_MA1467.3	Atoh1	MA1467.3	C_Neurod2	8619	0.22705	1651	0.20608	1497	0.13202	1.71058E-107	TRUE	FALSE	micro
Neurod2_MA0668.3	Neurod2	MA0668.3	C_Neurod2	13933	0.22247	2584	0.20284	2386	0.10949	1.30497E-107	TRUE	FALSE	micro
Rfx1_MA0509.1	Rfx1	MA0509.1	C_Rfx1	10854	0.44938	3501	0.41474	3237	0.10478	6.32340E-109	TRUE	FALSE	micro
Rfx6_MA1724.2	Rfx6	MA1724.2	C_Rfx6	9784	0.38182	2612	0.353	2396	0.09656	1.24119E-94	TRUE	FALSE	micro
Bhlha15_MA0607.1	Bhlha15	MA0607.1	C_Bhlha15	7160	0.15638	897	0.14213	824	0.08977	3.59702E-89	TRUE	FALSE	micro
Ptf1A_MA1618.2	Ptf1A	MA1618.2	C_Bhlha15	12268	0.18105	1839	0.16603	1686	0.08467	2.37877E-97	TRUE	FALSE	micro
Neurog1_MA0623.1	Neurog1	MA0623.1	C_Neurog1	3569	0.15571	403	0.14152	367	0.08399	1.17668E-72	TRUE	FALSE	micro
Msgn1_MA1524.3	Msgn1	MA1524.3	C_Msgn1	9374	0.19956	1500	0.18164	1363	0.07423	1.55413E-88	TRUE	FALSE	micro
Lhx1_MA1518.3	Lhx1	MA1518.3	C_Hoxd3	3301	0.19291	438	0.17466	392	0.06646	3.21831E-66	TRUE	FALSE	micro
Tcf21_MA0832.2	Tcf21	MA0832.2	C_Tcf21	7851	0.22708	1465	0.20893	1352	0.06352	9.42492E-74	TRUE	FALSE	micro
Egr2_MA0472.1	Egr2	MA0472.1	C_Egr2	31127	0.54775	11686	0.51981	11065	0.06243	8.21868E-109	TRUE	FALSE	micro
Stat2_MA1623.2	Stat2	MA1623.2	C_Stat2	41470	0.16083	5500	0.15277	5289	-0.05086	7.97232E-103	TRUE	FALSE	micro
Arntl_MA0603.2	Arntl	MA0603.2	C_Arnt	3966	0.73211	1724	0.71773	1702	-0.08368	6.55203E-75	TRUE	FALSE	micro
NFKB1_MA0105.1	NFKB1	MA0105.1	C_NFKB1	8267	0.35022	2350	0.34232	2349	-0.08706	6.67817E-94	TRUE	FALSE	micro
Crem_MA0609.1	Crem	MA0609.1	C_Crem	2248	1.08102	1201	1.05984	1167	-0.09206	3.38762E-66	TRUE	FALSE	micro
Ikzf3_MA1992.2	Ikzf3	MA1992.2	C_Ets1	29375	0.32788	7571	0.31957	7558	-0.0964	4.53767E-120	TRUE	FALSE	micro
Elf5_MA0136.4	Elf5	MA0136.4	C_Elf5	28688	0.24404	5674	0.2389	5744	-0.1113	1.92802E-131	TRUE	FALSE	micro
CEBPA_MA0102.2	CEBPA	MA0102.2	C_CEBPA	5594	0.2075	926	0.20519	951	-0.11146	1.03362E-92	TRUE	FALSE	micro
Ets1_MA0098.2	Ets1	MA0098.2	C_Ets1	34527	0.32983	8822	0.32329	8924	-0.1201	1.85853E-132	TRUE	FALSE	micro
Spi1_MA0080.7	Spi1	MA0080.7	C_Spi1	40784	0.25853	8418	0.25318	8585	-0.12403	1.61351E-142	TRUE	FALSE	micro
Erg_MA0474.4	Erg	MA0474.4	C_Ets1	27857	0.32848	6934	0.32399	7040	-0.13789	1.69579E-138	TRUE	FALSE	micro
Gabpa_MA0062.2	Gabpa	MA0062.2	C_Gabpa	11205	0.90566	6052	0.89516	6067	-0.21289	8.06741E-139	TRUE	FALSE	micro
Bhlha15_MA0607.1	Bhlha15	MA0607.1	C_Bhlha15	5288	0.202	631	0.2024	651	0.0632	2.21448E-71	TRUE	FALSE	oligo
Atoh1_MA1467.3	Atoh1	MA1467.3	C_Neurod2	6753	0.28767	1206	0.28615	1226	0.06056	5.06885E-72	TRUE	FALSE	oligo
Atoh1_MA0461.3	Atoh1	MA0461.3	C_Neurog1	2497	0.16687	217	0.16662	227	0.04999	9.39102E-46	TRUE	FALSE	oligo
Neurod2_MA0668.3	Neurod2	MA0668.3	C_Neurod2	11091	0.27815	1900	0.27757	1932	0.04915	3.56053E-75	TRUE	FALSE	oligo
Msgn1_MA1524.3	Msgn1	MA1524.3	C_Msgn1	7328	0.25317	1064	0.25164	1094	0.04802	2.19226E-63	TRUE	FALSE	oligo
Barhl1_MA0877.1	Barhl1	MA0877.1	C_Nkx2-5	4612	0.27563	607	0.27411	618	0.04772	2.90395E-55	TRUE	FALSE	oligo
Tcf21_MA0832.2	Tcf21	MA0832.2	C_Tcf21	6340	0.28459	1091	0.285	1118	0.04743	3.15593E-64	TRUE	FALSE	oligo
Neurog1_MA0623.1	Neurog1	MA0623.1	C_Neurog1	3004	0.19973	330	0.19917	335	0.04633	9.59074E-47	TRUE	FALSE	oligo
Ascl2_MA0816.1	Ascl2	MA0816.1	C_Bhlha15	11652	0.37429	2840	0.37307	2856	0.04423	8.29163E-69	TRUE	FALSE	oligo
Klf4_MA0039.2	Klf4	MA0039.2	C_Klf4	25278	1.30225	13824	1.31922	14095	-0.05655	3.70870E-98	TRUE	FALSE	oligo
Spi1_MA0080.7	Spi1	MA0080.7	C_Spi1	23647	0.40692	5736	0.42812	6265	-0.09708	4.45430E-115	TRUE	FALSE	oligo
Nr1H2_MA1996.2	Nr1H2	MA1996.2	C_Ppara	16861	0.30918	3218	0.32227	3466	-0.09864	8.96506E-107	TRUE	FALSE	oligo
Nr1h3_MA2337.1	Nr1h3	MA2337.1	C_Ppara	16861	0.30918	3218	0.32227	3466	-0.09864	8.96506E-107	TRUE	FALSE	oligo
Nr1H4_MA1110.3	Nr1H4	MA1110.3	C_Ppara	16861	0.30918	3218	0.32227	3466	-0.09864	8.96506E-107	TRUE	FALSE	oligo
Ikzf3_MA1992.2	Ikzf3	MA1992.2	C_Ets1	17354	0.49955	5120	0.52415	5475	-0.09983	4.99116E-107	TRUE	FALSE	oligo
Pax2_MA0067.1	Pax2	MA0067.1	C_Pax2	2297	0.7569	885	0.78477	925	-0.10097	5.29635E-75	TRUE	FALSE	oligo
Nr2f6_MA0677.2	Nr2f6	MA0677.2	C_Nr2f6	7732	0.31135	1430	0.32519	1550	-0.10265	1.65480E-97	TRUE	FALSE	oligo
NFKB1_MA0105.1	NFKB1	MA0105.1	C_NFKB1	5379	0.49551	1632	0.52108	1757	-0.10299	8.02399E-90	TRUE	FALSE	oligo
CREB1_MA0018.2	CREB1	MA0018.2	C_CREB1	4361	0.908	1746	0.93907	1791	-0.10744	1.76490E-80	TRUE	FALSE	oligo
Nr2F6_MA0728.1	Nr2F6	MA0728.1	C_Rarb	7196	0.2999	1274	0.31268	1382	-0.10909	3.77528E-96	TRUE	FALSE	oligo
Npas4_MA1995.2	Npas4	MA1995.2	C_Npas4	1121	0.74201	423	0.77067	449	-0.11125	5.43554E-64	TRUE	FALSE	oligo
Ets1_MA0098.2	Ets1	MA0098.2	C_Ets1	20653	0.51334	6237	0.53939	6735	-0.1129	1.44686E-120	TRUE	FALSE	oligo
Elf5_MA0136.4	Elf5	MA0136.4	C_Elf5	16079	0.38776	3797	0.41044	4166	-0.12418	3.64649E-123	TRUE	FALSE	oligo
Gabpa_MA0062.2	Gabpa	MA0062.2	C_Gabpa	7907	1.31021	5074	1.36697	5201	-0.12999	4.50695E-102	TRUE	FALSE	oligo
Zbtb2_MA2340.1	Zbtb2	MA2340.1	C_Gabpa	5927	1.29699	3785	1.35583	3867	-0.13835	4.48612E-100	TRUE	FALSE	oligo

## Sheet: TF_GEX_consistent
output_prefix	name	motif_id	cluster	total_tfbs	Bexa_mean_score	Bexa_bound	Controls_mean_score	Controls_bound	Bexa_Controls_change	Bexa_Controls_pvalue	Bexa_Controls_highlighted	Consistent with gex	celltype	GEX_avg_log2FC	GEX_p_val_adj
AhrArnt_MA0006.2	Ahr::Arnt	MA0006.2	C_Ahr::Arnt	43621	0.90645	20720	0.92181	21065	-0.02374	1.12270E-74	FALSE	TRUE	oligo	-0.00219586	1
AhrArnt_MA0006.2	Ahr::Arnt	MA0006.2	C_Ahr::Arnt	51595	0.70693	24479	0.67536	23420	0.01316	4.70157E-45	FALSE	TRUE	micro	0.00220946	1
Alx4_MA0853.2	Alx4	MA0853.2	C_Alx1	2851	0.31766	373	0.2813	309	-0.0352	1.39615E-32	FALSE	TRUE	endo	-0.000165154	1
Arid3a_MA0151.1	Arid3a	MA0151.1	C_Arid3b	8725	0.23952	729	0.25152	806	0.0116	6.42555E-13	FALSE	TRUE	astro	0.00334762	1
Arid3b_MA0601.2	Arid3b	MA0601.2	C_Arid3b	6822	0.21862	512	0.22834	562	0.02888	4.85114E-42	FALSE	TRUE	astro	0.00821649	1
Arnt_MA0004.1	Arnt	MA0004.1	C_Arnt	5514	1.0474	2432	0.98311	2269	-0.01726	1.12811E-22	FALSE	TRUE	endo	-0.0130971	1
ARNTHIF1A_MA0259.2	ARNT::HIF1A	MA0259.2	C_Arnt	19224	0.84612	7143	0.7854	6561	-0.00635	4.00765E-17	FALSE	TRUE	endo	-0.0130971	1
Arntl_MA0603.2	Arntl	MA0603.2	C_Arnt	2813	1.28385	1402	1.22175	1329	-0.06025	2.92540E-54	FALSE	TRUE	endo	-0.0101818	1
Arx_MA0874.2	Arx	MA0874.2	C_Alx1	3741	0.25328	443	0.25313	448	0.01824	7.55482E-21	FALSE	TRUE	oligo	0.00392424	1
Arx_MA0874.2	Arx	MA0874.2	C_Alx1	3816	0.31451	367	0.32405	379	0.03235	7.59075E-39	FALSE	TRUE	astro	0.0636891	2.13856e-05
Ascl2_MA0816.1	Ascl2	MA0816.1	C_Bhlha15	8449	0.55262	2437	0.48719	2146	0.07936	1.21891E-86	TRUE	TRUE	endo	0.000177372	1
Ascl2_MA0816.1	Ascl2	MA0816.1	C_Bhlha15	14800	0.30358	3946	0.27972	3649	0.06398	1.33373E-87	TRUE	TRUE	micro	0.00541293	1
Atf1_MA0604.1	Atf1	MA0604.1	C_Crem	1527	1.55529	815	1.4874	795	-0.09652	1.71386E-60	TRUE	TRUE	endo	-0.0085062	1
Atf3_MA0605.1	Atf3	MA0605.1	C_Atf3	3270	0.7191	1294	0.69942	1255	-0.04263	6.86570E-46	FALSE	TRUE	micro	-0.0104844	1
Bach1Mafk_MA0591.2	Bach1::Mafk	MA0591.2	C_Bach1::Mafk	5097	0.61532	1301	0.6467	1372	-0.01764	4.21877E-22	FALSE	TRUE	astro	-0.00223735	1
Bach1Mafk_MA0591.2	Bach1::Mafk	MA0591.2	C_Bach1::Mafk	11166	0.29046	2697	0.27631	2586	0.02302	3.38445E-45	FALSE	TRUE	micro	0.00464257	1
Bach1Mafk_MA0591.2	Bach1::Mafk	MA0591.2	C_Bach1::Mafk	6746	0.53114	1764	0.48645	1609	0.00621	8.65198E-07	FALSE	TRUE	endo	0.0256309	1
Bhlhe40_MA0464.1	Bhlhe40	MA0464.1	C_Bhlhe40	6461	0.48179	1653	0.49596	1706	-0.00806	7.92362E-07	FALSE	TRUE	oligo	-0.00744217	1
Bhlhe40_MA0464.1	Bhlhe40	MA0464.1	C_Bhlhe40	8810	0.35227	2143	0.33872	2073	0.00665	4.66993E-07	FALSE	TRUE	micro	0.000785549	1
Bhlhe40_MA0464.1	Bhlhe40	MA0464.1	C_Tcfl5	5049	0.69202	1495	0.64133	1370	0.01507	1.14958E-17	FALSE	TRUE	endo	0.0331397	1
Creb3l2_MA0608.1	Creb3l2	MA0608.1	C_Creb3l2	4171	0.70615	1775	0.68676	1723	-0.0626	2.34718E-66	FALSE	TRUE	micro	-0.0203422	1
Creb3l2_MA0608.1	Creb3l2	MA0608.1	C_Creb3l2	3026	1.20656	1435	1.13793	1348	-0.02895	7.60763E-26	FALSE	TRUE	endo	-0.0194629	1
Creb5_MA0840.2	Creb5	MA0840.2	C_Crem	3777	0.84666	1375	0.87172	1397	-0.04554	4.88289E-46	FALSE	TRUE	oligo	-0.206901	1.19383e-15
Creb5_MA0840.2	Creb5	MA0840.2	C_Creb5	4081	0.71293	1576	0.69381	1538	-0.02188	8.74580E-23	FALSE	TRUE	micro	-0.0228523	1
Dlx1_MA0879.1	Dlx1	MA0879.1	C_Hoxd3	4172	0.17419	417	0.17478	418	0.00623	1.78113E-04	FALSE	TRUE	oligo	0.000126615	1
Dlx1_MA0879.1	Dlx1	MA0879.1	C_Alx1	4001	0.2359	318	0.24473	329	0.04398	6.93089E-53	FALSE	TRUE	astro	0.000900372	1
Dlx2_MA0885.3	Dlx2	MA0885.3	C_Nobox	4585	0.2153	699	0.19814	644	0.03246	5.32675E-40	FALSE	TRUE	micro	0.000681085	1
Dlx2_MA0885.3	Dlx2	MA0885.3	C_Dlx2	3292	0.40668	465	0.41719	474	0.05983	2.57218E-54	TRUE	TRUE	astro	0.00762427	1
Dlx5_MA1476.3	Dlx5	MA1476.3	C_Nobox	2895	0.41924	517	0.37504	448	-0.00548	6.51567E-03	FALSE	TRUE	endo	-0.00116717	1
Dlx5_MA1476.3	Dlx5	MA1476.3	C_Nobox	4585	0.2153	699	0.19814	644	0.03246	5.32675E-40	FALSE	TRUE	micro	0.000681085	1
Ebf4_MA2122.1	Ebf4	MA2122.1	C_Ebf4	8528	0.51149	2120	0.45801	1882	0.03399	1.65477E-52	FALSE	TRUE	endo	0.00143893	1
Egr1_MA0162.1	Egr1	MA0162.1	C_Egr2	5369	1.45117	2921	1.50241	3002	-0.02712	2.95706E-35	FALSE	TRUE	astro	-0.0163274	1
Egr2_MA0472.1	Egr2	MA0472.1	C_Egr2	14531	1.05627	5816	1.09152	5991	-0.023	3.07594E-48	FALSE	TRUE	astro	-0.00294171	1
Elf5_MA0136.4	Elf5	MA0136.4	C_Elf5	11647	0.58292	2717	0.61619	2942	-0.0316	5.32660E-55	FALSE	TRUE	astro	-0.0036092	1
En1_MA0027.1	En1	MA0027.1	C_En1	5313	0.28444	901	0.28997	950	-0.01844	3.96877E-25	FALSE	TRUE	oligo	-0.000644304	1
Erg_MA0474.4	Erg	MA0474.4	C_Ets1	19261	0.53342	4704	0.49982	4445	-0.08715	1.84176E-108	TRUE	TRUE	endo	-0.0639278	1
Erg_MA0474.4	Erg	MA0474.4	C_Ets1	16739	0.49583	4847	0.52392	5244	-0.12914	2.37049E-128	TRUE	TRUE	oligo	-0.00196074	1
Esrrb_MA0141.2	Esrrb	MA0141.2	C_Ppara	8725	0.29421	1621	0.30207	1688	-0.05083	4.85115E-69	FALSE	TRUE	oligo	-0.00169028	1
Esrrb_MA0141.2	Esrrb	MA0141.2	C_Ppara	7871	0.38194	1471	0.34158	1287	-0.01435	8.00969E-25	FALSE	TRUE	endo	-0.000165154	1
Esrrg_MA0643.2	Esrrg	MA0643.2	C_Ppara	5818	0.36503	1033	0.32541	893	-0.01805	2.61887E-24	FALSE	TRUE	endo	-0.04307	1
Esrrg_MA0643.2	Esrrg	MA0643.2	C_Ppara	9996	0.20413	1702	0.19268	1621	-0.06067	1.67932E-80	FALSE	TRUE	micro	-0.00673592	1
Foxf1_MA1606.2	Foxf1	MA1606.2	C_Foxk1	7118	0.30969	951	0.28239	865	-0.09334	1.08793E-91	FALSE	TRUE	endo	-0.0276218	1
Foxj2_MA0614.1	Foxj2	MA0614.1	C_Foxk1	8935	0.19995	1345	0.18976	1289	-0.04101	3.96460E-63	FALSE	TRUE	micro	-0.00509114	1
Foxj3_MA0851.2	Foxj3	MA0851.2	C_Foxk1	11149	0.26323	1256	0.23835	1141	-0.09955	8.69332E-101	TRUE	TRUE	endo	-0.00655749	1
Foxj3_MA0851.2	Foxj3	MA0851.2	C_Foxk1	10472	0.20953	1217	0.21714	1286	-0.03877	5.26340E-62	FALSE	TRUE	oligo	-0.00557151	1
Foxk1_MA0852.1	Foxk1	MA0852.1	C_Foxk1	17267	0.17024	1620	0.17657	1728	-0.04186	1.73176E-79	FALSE	TRUE	oligo	-0.00197738	1
Foxl2_MA1607.2	Foxl2	MA1607.2	C_Foxk1	12675	0.19613	1345	0.20238	1433	-0.02563	1.09867E-49	FALSE	TRUE	oligo	-0.000575703	1
Foxo1_MA0480.3	Foxo1	MA0480.3	C_Foxk1	7118	0.30969	951	0.28239	865	-0.09334	1.08793E-91	FALSE	TRUE	endo	-0.0993984	1
Foxo1_MA0480.3	Foxo1	MA0480.3	C_Foxk1	10269	0.18816	1453	0.17813	1378	-0.04587	7.67998E-67	FALSE	TRUE	micro	-0.0135821	1
Foxo3_MA0157.4	Foxo3	MA0157.4	C_Foxk1	7551	0.24768	1044	0.25569	1093	-0.03861	4.66816E-54	FALSE	TRUE	oligo	-0.0207971	1
Foxo3_MA0157.4	Foxo3	MA0157.4	C_Foxk1	4610	0.3971	687	0.4203	740	-0.06891	1.44557E-68	FALSE	TRUE	astro	-0.00830255	1
Foxo3_MA0157.4	Foxo3	MA0157.4	C_Foxk1	13706	0.17543	1816	0.16581	1703	-0.04892	1.54914E-77	FALSE	TRUE	micro	-0.00264682	1
Gli1_MA1990.2	Gli1	MA1990.2	C_Gli1	6012	0.52798	1446	0.47616	1277	0.02757	1.38780E-36	FALSE	TRUE	endo	1.23091e-05	1
Gli2_MA0734.4	Gli2	MA0734.4	C_Gli1	6714	0.41434	1615	0.42004	1681	0.00855	8.12594E-12	FALSE	TRUE	oligo	0.0372163	1
Gmeb1_MA0615.2	Gmeb1	MA0615.2	C_Gmeb1	882	0.53657	222	0.55035	229	-0.0638	1.20591E-37	FALSE	TRUE	oligo	-0.00354178	1
Hic1_MA0739.2	Hic1	MA0739.2	C_Hic1	5081	0.48768	1048	0.49988	1081	0.00536	4.98760E-03	FALSE	TRUE	astro	0.000541583	1
Hic1_MA0739.2	Hic1	MA0739.2	C_Hic1	8994	0.25407	1982	0.23183	1813	0.09338	6.51698E-94	TRUE	TRUE	micro	0.0011872	1
Hic1_MA0739.2	Hic1	MA0739.2	C_Hic1	3661	0.42535	776	0.37347	667	0.04967	1.57484E-50	FALSE	TRUE	endo	0.0630203	0.495959
Hmga1_MA2124.1	Hmga1	MA2124.1	C_Hmga1	16207	0.11061	1337	0.10113	1211	0.00363	7.70849E-04	FALSE	TRUE	micro	0.00936526	1
Irf1_MA0050.4	Irf1	MA0050.4	C_Stat2	30100	0.15935	3862	0.15132	3778	-0.04405	3.57181E-91	FALSE	TRUE	micro	-0.031459	1
Irf1_MA0050.4	Irf1	MA0050.4	C_Stat2	20333	0.29635	2878	0.26541	2512	-0.04275	3.67877E-81	FALSE	TRUE	endo	-0.0173072	1
Irf1_MA0050.4	Irf1	MA0050.4	C_Stat2	22287	0.22451	3027	0.23302	3242	-0.02245	6.15068E-56	FALSE	TRUE	oligo	-0.000809733	1
Irf1_MA0050.4	Irf1	MA0050.4	C_Stat2	17546	0.32426	2219	0.34385	2417	-0.01202	9.22511E-27	FALSE	TRUE	astro	-2.26718e-05	1
Jun_MA0489.3	Jun	MA0489.3	C_Jun	6388	0.39411	1258	0.36622	1166	-0.00062	6.47548E-01	FALSE	TRUE	endo	-0.225149	2.96978e-06
Jun_MA0489.3	Jun	MA0489.3	C_FOS::JUN	8846	0.2402	1887	0.23261	1878	0.0193	6.99744E-30	FALSE	TRUE	micro	0.0535367	1
Klf1_MA0493.1	Klf1	MA0493.1	C_Klf4	15437	1.2369	6627	1.16191	6300	-0.08203	9.89995E-111	TRUE	TRUE	endo	-0.00151032	1
Klf1_MA0493.1	Klf1	MA0493.1	C_Klf4	15723	1.05985	6956	1.07714	7147	-0.05512	4.93879E-84	FALSE	TRUE	oligo	-0.00010354	1
Klf12_MA0742.1	Klf12	MA0742.1	C_Klf12	14208	1.11519	7507	1.07512	7354	-0.061	8.39030E-90	FALSE	TRUE	micro	-0.060647	1
Klf12_MA0742.1	Klf12	MA0742.1	C_Klf12	7608	2.12703	4717	2.17856	4814	-0.01103	4.74797E-12	FALSE	TRUE	astro	-0.0335904	1
Klf4_MA0039.2	Klf4	MA0039.2	C_Klf4	33947	0.93676	17083	0.8996	16656	-0.02744	5.32518E-74	FALSE	TRUE	micro	-0.039762	1
Klf4_MA0039.2	Klf4	MA0039.2	C_Klf4	16914	1.96431	10366	2.01011	10596	0.00302	1.26258E-03	FALSE	TRUE	astro	0.0445313	1
Lef1_MA0768.3	Lef1	MA0768.3	C_Lef1	9133	0.26589	1292	0.2713	1351	-0.03116	1.70513E-48	FALSE	TRUE	oligo	-0.00353286	1
Lhx1_MA1518.3	Lhx1	MA1518.3	C_Hoxd3	1973	0.3849	317	0.3423	263	-0.02415	3.70927E-16	FALSE	TRUE	endo	-0.000673056	1
Mafb_MA0117.3	Mafb	MA0117.3	C_Mafb	9186	0.20957	1587	0.19792	1519	-0.02303	1.50113E-41	FALSE	TRUE	micro	-0.0271919	1
Mafb_MA0117.3	Mafb	MA0117.3	C_Mafb	4409	0.44098	785	0.45987	837	0.00209	1.03937E-02	FALSE	TRUE	astro	0.0229039	1
Mafb_MA0117.3	Mafb	MA0117.3	C_Mafb	5390	0.39057	997	0.35005	911	0.00352	4.77447E-02	FALSE	TRUE	endo	0.031563	1
Mafg_MA0659.4	Mafg	MA0659.4	C_Bach1::Mafk	8729	0.36467	2078	0.3724	2151	0.00018	7.59160E-02	FALSE	TRUE	oligo	0.0437239	1
Mafg_MA0659.4	Mafg	MA0659.4	C_Bach1::Mafk	12309	0.26904	2894	0.25385	2768	0.02312	2.19091E-45	FALSE	TRUE	micro	0.0510831	1
Mafg_MA0659.4	Mafg	MA0659.4	C_Bach1::Mafk	7264	0.48073	1811	0.43487	1631	0.01061	1.96783E-11	FALSE	TRUE	endo	0.0521801	1
Mecom_MA0029.2	Mecom	MA0029.2	C_Mecom	6788	0.27563	836	0.24586	720	-0.07172	6.23693E-78	FALSE	TRUE	endo	-0.0183698	1
Mecom_MA0029.2	Mecom	MA0029.2	C_Mecom	5500	0.30352	616	0.32013	675	-0.02212	1.54532E-27	FALSE	TRUE	astro	-0.00112767	1
Meis1_MA0498.1	Meis1	MA0498.1	C_Meis1	9583	0.5542	2389	0.49549	2128	0.03336	3.60918E-52	FALSE	TRUE	endo	0.000177372	1
Meis1_MA0498.1	Meis1	MA0498.1	C_Meis1	12225	0.38875	2674	0.38981	2746	0.02054	2.72102E-45	FALSE	TRUE	oligo	0.000329472	1
Meis1_MA0498.1	Meis1	MA0498.1	C_Meis1	7729	0.62798	1869	0.64203	1951	0.02657	6.49829E-39	FALSE	TRUE	astro	0.00340662	1
Meis1_MA0498.1	Meis1	MA0498.1	C_Meis1	15978	0.29482	3569	0.27411	3323	0.0412	7.34926E-73	FALSE	TRUE	micro	0.0241383	1
Mitf_MA0620.1	Mitf	MA0620.1	C_Mitf	4692	0.71739	1967	0.70414	1935	-0.09459	5.77014E-85	TRUE	TRUE	micro	-0.0288128	1
Mitf_MA0620.1	Mitf	MA0620.1	C_Mitf	3960	0.88415	1611	0.91652	1660	-0.08114	1.35982E-75	FALSE	TRUE	oligo	-0.0265272	1
Mitf_MA0620.1	Mitf	MA0620.1	C_Mitf	3348	1.20453	1509	1.142	1438	-0.02829	1.43522E-25	FALSE	TRUE	endo	-0.0205444	1
Mlxip_MA0622.2	Mlxip	MA0622.2	C_Arnt	8129	0.58314	3102	0.56609	3028	-0.05002	6.18509E-68	FALSE	TRUE	micro	-0.0939546	0.00710813
Mlxip_MA0622.2	Mlxip	MA0622.2	C_Arnt	5514	1.0474	2432	0.98311	2269	-0.01726	1.12811E-22	FALSE	TRUE	endo	-0.00164548	1
Myb_MA0100.2	Myb	MA0100.2	C_Myb	7794	0.43828	1652	0.38963	1447	0.02423	1.82813E-38	FALSE	TRUE	endo	0.000507902	1
Myb_MA0100.2	Myb	MA0100.2	C_Myb	9710	0.31563	1854	0.31706	1918	0.01501	3.38152E-33	FALSE	TRUE	oligo	0.00240854	1
Myc_MA0147.2	Myc	MA0147.2	C_Myc	3935	0.56486	926	0.58409	966	0.0162	1.53501E-19	FALSE	TRUE	astro	0.00129577	1
Myc_MA0147.2	Myc	MA0147.2	C_Myc	5084	0.49378	1192	0.44131	1072	0.03832	2.40585E-46	FALSE	TRUE	endo	0.00220577	1
Myc_MA0147.2	Myc	MA0147.2	C_Myc	6398	0.35997	1368	0.36445	1393	0.00278	1.68458E-03	FALSE	TRUE	oligo	0.00698021	1
Myc_MA0147.2	Myc	MA0147.2	C_Myc	9099	0.26142	1845	0.24514	1759	0.02805	5.79175E-48	FALSE	TRUE	micro	0.0331295	1
Mycn_MA0104.3	Mycn	MA0104.3	C_Arnt	2237	1.11639	979	1.1622	1005	0.00403	4.52638E-02	FALSE	TRUE	astro	0.000931972	1
Mycn_MA0104.3	Mycn	MA0104.3	C_Arnt	3696	1.02785	1657	0.95716	1529	0.01923	3.71777E-21	FALSE	TRUE	endo	0.00927581	1
Myog_MA0500.1	Myog	MA0500.1	C_Bhlha15	8988	0.63068	2497	0.64623	2600	0.03361	2.60811E-54	FALSE	TRUE	astro	3.05328e-05	1
Neurod2_MA0668.3	Neurod2	MA0668.3	C_Neurod2	8122	0.40587	1648	0.35432	1412	0.06784	4.72210E-75	TRUE	TRUE	endo	0.00071865	1
Neurod2_MA0668.3	Neurod2	MA0668.3	C_Neurod2	5629	0.4622	1093	0.47486	1131	0.02137	7.03658E-31	FALSE	TRUE	astro	0.000960686	1
Neurod2_MA1993.2	Neurod2	MA1993.2	C_Bhlha15	16321	0.5799	4865	0.51487	4275	0.06726	4.37662E-96	TRUE	TRUE	endo	0.00071865	1
Neurod2_MA1993.2	Neurod2	MA1993.2	C_Bhlha15	14198	0.62541	3884	0.64129	4012	0.01789	1.48697E-41	FALSE	TRUE	astro	0.000960686	1
Neurog1_MA0623.1	Neurog1	MA0623.1	C_Neurog1	2296	0.29285	304	0.25777	259	-0.00579	3.24790E-01	FALSE	TRUE	endo	-0.000673056	1
Nfat5_MA0606.3	Nfat5	MA0606.3	C_Nfat5	12648	0.32406	1886	0.28889	1643	-0.0378	2.35695E-66	FALSE	TRUE	endo	-0.00784023	1
Nfat5_MA0606.3	Nfat5	MA0606.3	C_Nfat5	19130	0.17762	2675	0.165	2495	0.00169	8.27853E-03	FALSE	TRUE	micro	0.0472703	1
Nfatc1_MA0624.3	Nfatc1	MA0624.3	C_Nfatc1	33965	0.21606	6018	0.20069	5573	0.01758	1.55274E-58	FALSE	TRUE	micro	0.0246899	1
Nfatc1_MA0624.3	Nfatc1	MA0624.3	C_Nfatc1	16427	0.43991	2907	0.45659	3062	0.00748	1.11596E-12	FALSE	TRUE	astro	0.0248216	1
Nfatc1_MA0624.3	Nfatc1	MA0624.3	C_Nfatc1	20334	0.39859	3884	0.3551	3426	0.00451	3.63129E-09	FALSE	TRUE	endo	0.0303454	1
Nfatc2_MA0152.3	Nfatc2	MA0152.3	C_Nfatc1	19199	0.19377	2910	0.18087	2750	-0.01737	9.28786E-38	FALSE	TRUE	micro	-0.00942373	1
Nfe2l2_MA0150.3	Nfe2l2	MA0150.3	C_Nfe2l2	7712	0.31948	1542	0.32843	1619	0.00052	1.85502E-01	FALSE	TRUE	oligo	0.0538028	1
Npas2_MA0626.2	Npas2	MA0626.2	C_Arnt	3065	0.55244	1030	0.56354	1044	0.00847	2.68708E-08	FALSE	TRUE	oligo	0.00472139	1
Npas2_MA0626.2	Npas2	MA0626.2	C_Arnt	2122	0.83137	781	0.86646	805	0.00954	3.53285E-05	FALSE	TRUE	astro	0.0900373	0.0165803
Npas4_MA1995.2	Npas4	MA1995.2	C_Npas4	794	1.13757	335	1.1973	354	-0.13012	8.44305E-56	TRUE	TRUE	astro	-0.00305771	1
Nr1h3_MA2337.1	Nr1h3	MA2337.1	C_Nr1h3	15169	0.40007	2955	0.36327	2642	-0.04442	2.34628E-76	FALSE	TRUE	endo	-0.00367332	1
Nr2e3_MA0164.2	Nr2e3	MA0164.2	C_Nr2e3	6223	0.44032	1305	0.39303	1151	0.01185	5.20656E-19	FALSE	TRUE	endo	0.000507902	1
Nr2f6_MA0677.2	Nr2f6	MA0677.2	C_Nr2f6	7320	0.39049	1326	0.35758	1218	-0.07188	1.68691E-80	FALSE	TRUE	endo	-0.00873337	1
Nrf1_MA0506.3	Nrf1	MA0506.3	C_Nrf1	7596	1.87536	5300	1.94966	5358	0.01293	3.12877E-16	FALSE	TRUE	astro	0.0326626	1
Olig2_MA1997.2	Olig2	MA1997.2	C_Bhlha15	16321	0.5799	4865	0.51487	4275	0.06726	4.37662E-96	TRUE	TRUE	endo	0.00491488	1
Olig2_MA1997.2	Olig2	MA1997.2	C_Bhlha15	26911	0.3152	7336	0.29228	6847	0.04232	1.17038E-90	FALSE	TRUE	micro	0.0096081	1
Olig2_MA1997.2	Olig2	MA1997.2	C_Bhlha15	14198	0.62541	3884	0.64129	4012	0.01789	1.48697E-41	FALSE	TRUE	astro	0.0851824	2.90434e-10
Olig2_MA1997.2	Olig2	MA1997.2	C_Bhlha15	22375	0.39402	5664	0.39548	5758	0.01461	1.33403E-39	FALSE	TRUE	oligo	0.130658	0.178698
Plagl1_MA1615.2	Plagl1	MA1615.2	C_Plagl1	12052	0.42648	3714	0.40267	3540	-0.0049	1.32699E-09	FALSE	TRUE	micro	-0.00420456	1
Plagl1_MA1615.2	Plagl1	MA1615.2	C_Plagl1	5833	0.8745	1851	0.89627	1927	0.0052	7.63429E-06	FALSE	TRUE	astro	0.0276613	1
Pou2f3_MA0627.1	Pou2f3	MA0627.1	C_Pou2f3	7116	0.35336	866	0.36402	886	0.02921	5.37118E-44	FALSE	TRUE	astro	0.000512055	1
Pou2f3_MA0627.1	Pou2f3	MA0627.1	C_Pou2f3	9468	0.23271	1107	0.2322	1116	0.05879	3.00136E-75	TRUE	TRUE	oligo	0.00129456	1
Pou2f3_MA0627.1	Pou2f3	MA0627.1	C_Pou2f3	11247	0.17468	1311	0.16088	1197	0.0167	5.05310E-34	FALSE	TRUE	micro	0.00642299	1
Pou5f1Sox2_MA0142.1	Pou5f1::Sox2	MA0142.1	C_Pou5f1::Sox2	11443	0.24459	1238	0.21515	1081	-0.06112	5.04396E-88	FALSE	TRUE	endo	-0.00233094	1
Pou5f1Sox2_MA0142.1	Pou5f1::Sox2	MA0142.1	C_Pou5f1::Sox2	13680	0.17819	1352	0.17882	1405	0.03342	6.84085E-62	FALSE	TRUE	oligo	0.0014338	1
Pou5f1Sox2_MA0142.1	Pou5f1::Sox2	MA0142.1	C_Pou5f1::Sox2	10466	0.26428	1007	0.27487	1070	0.02136	1.82633E-40	FALSE	TRUE	astro	0.00253725	1
Pou5f1Sox2_MA0142.1	Pou5f1::Sox2	MA0142.1	C_Pou5f1::Sox2	16241	0.13518	1632	0.12362	1501	0.01844	1.24197E-38	FALSE	TRUE	micro	0.0084337	1
Ppara_MA2338.1	Ppara	MA2338.1	C_Ppara	6499	0.19497	1080	0.18528	1029	-0.07996	1.00323E-78	FALSE	TRUE	micro	-0.00100316	1
Ppara_MA2338.1	Ppara	MA2338.1	C_Ppara	4128	0.3401	681	0.30465	588	-0.03486	2.05666E-39	FALSE	TRUE	endo	0.00525379	1
PpargRxra_MA0065.3	Pparg::Rxra	MA0065.3	C_Pparg::Rxra	13211	0.45208	2852	0.40819	2561	-0.00526	3.01544E-08	FALSE	TRUE	endo	-0.00910819	1
PpargRxra_MA0065.3	Pparg::Rxra	MA0065.3	C_Pparg::Rxra	21396	0.25798	4569	0.24411	4343	-0.04248	1.88842E-82	FALSE	TRUE	micro	-0.000159365	1
PpargRxra_MA0065.3	Pparg::Rxra	MA0065.3	C_Pparg::Rxra	15280	0.34665	3212	0.35631	3399	-0.06335	1.25274E-89	FALSE	TRUE	oligo	-0.00010354	1
Prdm4_MA1647.3	Prdm4	MA1647.3	C_Prdm4	6641	0.50113	1351	0.52028	1442	0.00278	4.68940E-03	FALSE	TRUE	astro	0.00392683	1
Prdm5_MA1999.2	Prdm5	MA1999.2	C_Prdm5	16968	0.25334	3612	0.23362	3324	0.04909	3.37202E-74	FALSE	TRUE	micro	0.0125951	1
Prdm5_MA1999.2	Prdm5	MA1999.2	C_Prdm5	8503	0.50307	1778	0.51694	1866	0.01131	3.72983E-18	FALSE	TRUE	astro	0.063854	0.916777
Rarb_MA0857.1	Rarb	MA0857.1	C_Rarb	10896	0.18321	1610	0.1739	1523	-0.05701	1.88028E-75	FALSE	TRUE	micro	-0.00368703	1
Rarb_MA0857.1	Rarb	MA0857.1	C_Rarb	7220	0.32558	1073	0.29307	939	-0.03513	1.06067E-49	FALSE	TRUE	endo	-0.00274116	1
Rarg_MA0859.2	Rarg	MA0859.2	C_Rarb	9891	0.19411	1538	0.18437	1469	-0.05483	6.75021E-83	FALSE	TRUE	micro	-0.000434383	1
Rarg_MA0860.1	Rarg	MA0860.1	C_Rarg	10210	0.24981	2186	0.23573	2070	-0.01588	9.77260E-31	FALSE	TRUE	micro	-0.000434383	1
Rfx1_MA0509.1	Rfx1	MA0509.1	C_Rfx1	8115	0.6137	2753	0.60596	2720	0.09775	6.66870E-89	TRUE	TRUE	oligo	0.00448863	1
Rfx1_MA0509.1	Rfx1	MA0509.1	C_Rfx1	6202	0.86242	2134	0.87496	2171	0.0151	1.42873E-24	FALSE	TRUE	astro	0.00844473	1
Rfx1_MA0509.1	Rfx1	MA0509.1	C_Rfx1	6444	0.84648	2445	0.75876	2219	0.07237	1.50609E-77	TRUE	TRUE	endo	0.0239606	1
Runx1_MA0002.3	Runx1	MA0002.3	C_Runx1	8619	0.4164	1731	0.37104	1547	0.00896	1.30375E-11	FALSE	TRUE	endo	0.00844334	1
Six3_MA0631.2	Six3	MA0631.2	C_Six3	4071	0.1679	518	0.15585	483	-0.00289	9.96931E-02	FALSE	TRUE	micro	-0.00454318	1
Six3_MA0631.2	Six3	MA0631.2	C_Six3	1975	0.36681	261	0.38243	274	-0.02359	7.08373E-17	FALSE	TRUE	astro	-0.00312142	1
Six3_MA0631.2	Six3	MA0631.2	C_Six3	2586	0.31215	355	0.27617	298	-0.00987	3.53093E-04	FALSE	TRUE	endo	-0.00234652	1
Six3_MA0631.2	Six3	MA0631.2	C_Six3	3078	0.22907	381	0.23284	395	0.00833	4.42543E-04	FALSE	TRUE	oligo	0.00224595	1
Smad4_MA1153.2	Smad4	MA1153.2	C_Smad4	4291	0.22559	759	0.21064	718	0.03061	9.77859E-34	FALSE	TRUE	micro	0.0174177	1
Sox1_MA0870.1	Sox1	MA0870.1	C_Sox1	4056	0.36346	503	0.37531	516	0.00206	4.14275E-01	FALSE	TRUE	astro	0.0607743	0.000584268
Sox11_MA0869.3	Sox11	MA0869.3	C_Sox11	15148	0.21939	2864	0.20228	2610	-0.01035	2.67996E-22	FALSE	TRUE	micro	-0.0018157	1
Sox3_MA0514.3	Sox3	MA0514.3	C_Sox3	7622	0.25084	1163	0.25211	1173	0.00198	7.87567E-01	FALSE	TRUE	oligo	0.00708271	1
Sox5_MA0087.3	Sox5	MA0087.3	C_Sox6	9161	0.20437	1591	0.18928	1470	-0.0327	1.90149E-52	FALSE	TRUE	micro	-0.000409406	1
Sox6_MA0515.1	Sox6	MA0515.1	C_Sox6	15301	0.31313	2327	0.27679	2028	-0.05593	4.47874E-90	FALSE	TRUE	endo	-0.00414281	1
Sox6_MA0515.1	Sox6	MA0515.1	C_Sox6	20372	0.18773	3297	0.17376	3036	-0.03349	1.77417E-67	FALSE	TRUE	micro	-0.00232417	1
Sox7_MA2095.1	Sox7	MA2095.1	C_Sox6	10603	0.25484	1589	0.25658	1652	-0.01403	5.02323E-27	FALSE	TRUE	oligo	-0.00212838	1
Srebf1_MA0829.1	Srebf1	MA0829.1	C_Srebf1	3162	0.87156	1277	0.90213	1318	-0.08178	4.11080E-70	FALSE	TRUE	oligo	-0.220274	2.78608e-26
Srebf1_MA0829.1	Srebf1	MA0829.1	C_Srebf1	2227	1.37342	1052	1.44075	1088	-0.07116	1.25005E-52	TRUE	TRUE	astro	-0.0776127	0.00276597
Srebf1_MA0829.1	Srebf1	MA0829.1	C_Srebf1	2782	1.15243	1205	1.09587	1158	-0.05621	8.13768E-48	FALSE	TRUE	endo	-0.00379751	1
Stat3_MA0144.1	Stat3	MA0144.1	C_Stat3	11918	0.51245	2867	0.46691	2579	-0.01459	2.17052E-28	FALSE	TRUE	endo	-0.135198	0.000483491
Stat3_MA0144.1	Stat3	MA0144.1	C_Stat3	17093	0.30373	4098	0.2881	3930	-0.01228	1.10384E-26	FALSE	TRUE	micro	-0.0201241	1
Stat4_MA0518.2	Stat4	MA0518.2	C_Stat4	11142	0.44987	2311	0.40982	2081	-0.02776	6.90084E-48	FALSE	TRUE	endo	-0.00883712	1
Stat4_MA0518.2	Stat4	MA0518.2	C_Stat4	16119	0.25257	3110	0.23925	2955	-0.01376	2.61051E-33	FALSE	TRUE	micro	-0.00499559	1
Stat5a_MA1624.2	Stat5a	MA1624.2	C_Stat5a	10484	0.46158	2223	0.41851	1995	-0.02388	7.36400E-41	FALSE	TRUE	endo	-0.00500853	1
Stat5a_MA1624.2	Stat5a	MA1624.2	C_Stat5a	14845	0.25467	2888	0.23906	2722	0.00494	4.43220E-08	FALSE	TRUE	micro	0.00893113	1
Stat5aStat5b_MA0519.2	Stat5a::Stat5b	MA0519.2	C_Stat5b	8953	0.52936	1852	0.55014	1961	-0.00931	2.71860E-11	FALSE	TRUE	astro	-0.00598218	1
Stat5aStat5b_MA0519.2	Stat5a::Stat5b	MA0519.2	C_Stat5b	10681	0.46625	2296	0.42143	2042	-0.01331	4.36948E-30	FALSE	TRUE	endo	-0.00500853	1
Stat5aStat5b_MA0519.2	Stat5a::Stat5b	MA0519.2	C_Stat5b	12042	0.35764	2495	0.36348	2550	-0.00842	1.80128E-18	FALSE	TRUE	oligo	-0.0018634	1
Stat5aStat5b_MA0519.2	Stat5a::Stat5b	MA0519.2	C_Stat5a::Stat5b	15522	0.26278	3132	0.24684	2930	0.01036	6.50861E-20	FALSE	TRUE	micro	0.00893113	1
Stat5b_MA1625.2	Stat5b	MA1625.2	C_Stat5a::Stat5b	17473	0.29033	3743	0.27336	3535	0.01671	1.10423E-37	FALSE	TRUE	micro	0.0572622	1
Stat6_MA0520.2	Stat6	MA0520.2	C_Stat6	9917	0.25653	1465	0.26026	1520	0.00571	5.69994E-10	FALSE	TRUE	oligo	0.00157343	1
Tbx6_MA1567.3	Tbx6	MA1567.3	C_Tbx6	5346	0.46913	1036	0.48705	1099	-0.01688	7.82071E-22	FALSE	TRUE	astro	-0.00138936	1
Tbx6_MA1567.3	Tbx6	MA1567.3	C_Tbx6	11314	0.22263	2044	0.20649	1946	0.0308	1.87376E-53	FALSE	TRUE	micro	0.00359248	1
Tcf12_MA0521.3	Tcf12	MA0521.3	C_Bhlha15	14198	0.62541	3884	0.64129	4012	0.01789	1.48697E-41	FALSE	TRUE	astro	0.022879	1
Tcf12_MA0521.3	Tcf12	MA0521.3	C_Bhlha15	26911	0.3152	7336	0.29228	6847	0.04232	1.17038E-90	FALSE	TRUE	micro	0.0394027	1
Tcf3_MA0522.1	Tcf3	MA0522.1	C_Bhlha15	10252	0.60341	2798	0.61684	2904	0.03315	3.45026E-57	FALSE	TRUE	astro	0.0253111	1
Tcf3_MA0522.1	Tcf3	MA0522.1	C_Bhlha15	21373	0.31049	5882	0.28654	5492	0.0576	6.78222E-95	FALSE	TRUE	micro	0.0407705	1
Tcf3_MA0522.1	Tcf3	MA0522.1	C_Bhlha15	17099	0.38422	4325	0.38492	4424	0.01638	2.58729E-38	FALSE	TRUE	oligo	0.043343	1
Tcf7_MA0769.1	Tcf7	MA0769.1	C_Hnf1A	15878	0.16707	2153	0.15602	2037	-0.02723	9.32798E-53	FALSE	TRUE	micro	-0.00201878	1
Tcfl5_MA0632.1	Tcfl5	MA0632.1	C_Bhlhe40	1559	1.09627	813	1.13631	825	-0.08685	6.29655E-58	FALSE	TRUE	oligo	-0.00266772	1
Tfcp2l1_MA0145.2	Tfcp2l1	MA0145.2	C_Tfcp2l1	8966	0.47023	2669	0.4756	2724	-0.01868	1.12740E-31	FALSE	TRUE	oligo	-0.00017245	1
Tfcp2l1_MA0145.2	Tfcp2l1	MA0145.2	C_Tfcp2l1	7329	0.61988	2310	0.55774	2079	0.02686	3.81675E-40	FALSE	TRUE	endo	0.00338516	1
Tfcp2l1_MA0145.2	Tfcp2l1	MA0145.2	C_Tfcp2l1	6219	0.6476	1723	0.66723	1803	0.01288	5.79785E-14	FALSE	TRUE	astro	0.0122355	1
Twist2_MA0633.3	Twist2	MA0633.3	C_Bhlha15	14198	0.62541	3884	0.64129	4012	0.01789	1.48697E-41	FALSE	TRUE	astro	0.00153369	1
Vdr_MA0693.4	Vdr	MA0693.4	C_Vdr	7409	0.3271	1158	0.2949	1021	-0.04364	3.94916E-60	FALSE	TRUE	endo	-0.000673056	1
Yy1_MA0095.4	Yy1	MA0095.4	C_Yy1	12629	0.31871	2692	0.30089	2565	-0.00071	3.46441E-01	FALSE	TRUE	micro	-0.0119615	1
Yy1_MA0095.4	Yy1	MA0095.4	C_Yy1	6860	0.6812	1815	0.70074	1857	0.04369	2.06133E-61	FALSE	TRUE	astro	0.0517797	0.102061
Yy1_MA0095.4	Yy1	MA0095.4	C_Yy1	8975	0.46098	2191	0.46629	2218	0.01356	2.07845E-20	FALSE	TRUE	oligo	0.0850491	1
Zbtb2_MA2340.1	Zbtb2	MA2340.1	C_Gabpa	8174	0.91771	4477	0.90643	4456	-0.20149	1.11823E-126	TRUE	TRUE	micro	-0.0065644	1
Zbtb2_MA2340.1	Zbtb2	MA2340.1	C_Zbtb2	6464	1.3908	3674	1.33189	3577	-0.16708	3.83586E-110	TRUE	TRUE	endo	-0.000760095	1
Zfp335_MA2002.2	Zfp335	MA2002.2	C_Zfp335	4544	0.50339	1053	0.44945	939	0.03595	1.83110E-45	FALSE	TRUE	endo	0.00438516	1
Zfp335_MA2002.2	Zfp335	MA2002.2	C_Zfp335	5454	0.37166	1196	0.37467	1223	0.01158	3.14965E-13	FALSE	TRUE	oligo	0.00529115	1
Zfp335_MA2002.2	Zfp335	MA2002.2	C_Zfp335	7561	0.27056	1602	0.25195	1515	0.04876	8.65801E-64	FALSE	TRUE	micro	0.00821009	1
Zfp335_MA2002.2	Zfp335	MA2002.2	C_Zfp335	3686	0.5711	841	0.58868	872	0.00782	1.24972E-09	FALSE	TRUE	astro	0.0120367	1
Zfp809_MA2125.1	Zfp809	MA2125.1	C_Zfp809	14886	0.4666	4042	0.47002	4133	-0.0026	5.87556E-03	FALSE	TRUE	oligo	-0.00293444	1
Zfp809_MA2125.1	Zfp809	MA2125.1	C_Zfp809	20606	0.336	5310	0.31361	4974	0.03729	6.59085E-80	FALSE	TRUE	micro	0.0148318	1
Zfp809_MA2125.1	Zfp809	MA2125.1	C_Zfp809	10622	0.67956	2851	0.6986	2966	0.00839	4.75651E-14	FALSE	TRUE	astro	0.0232753	1
Zfp961_MA2126.1	Zfp961	MA2126.1	C_Zfp961	4225	0.69358	1803	0.70129	1839	-0.0296	6.69469E-32	FALSE	TRUE	oligo	-0.00871672	1
Zfp961_MA2126.1	Zfp961	MA2126.1	C_Zfp961	2687	1.00169	1178	1.02697	1223	0.01988	7.59880E-17	FALSE	TRUE	astro	0.00192127	1
Zfp961_MA2126.1	Zfp961	MA2126.1	C_Zfp961	5120	0.53728	2178	0.50575	2062	0.03357	2.94232E-41	FALSE	TRUE	micro	0.00834747	1
Zfx_MA0146.3	Zfx	MA0146.3	C_Zfx	15886	0.67742	7622	0.64345	7304	-0.02064	8.00893E-41	FALSE	TRUE	micro	-0.00399104	1
Zfx_MA0146.3	Zfx	MA0146.3	C_Zfx	8311	1.2603	3896	1.29286	4078	0.00543	1.27262E-07	FALSE	TRUE	astro	0.0142754	1
Zic1Zic2_MA1628.2	Zic1::Zic2	MA1628.2	C_Zic2	13224	0.45936	4038	0.46294	4112	-0.0071	7.75722E-12	FALSE	TRUE	oligo	-0.000138006	1
Zic1Zic2_MA1628.2	Zic1::Zic2	MA1628.2	C_Zic2	9348	0.67579	2838	0.69454	2982	0.00423	1.21378E-05	FALSE	TRUE	astro	0.0104822	1
Zic1Zic2_MA1628.2	Zic1::Zic2	MA1628.2	C_Zic2	11396	0.60392	3630	0.53528	3227	0.06497	5.89898E-86	FALSE	TRUE	endo	0.0304551	1
Zic2_MA1629.2	Zic2	MA1629.2	C_Zic2	12439	0.42298	3423	0.43017	3491	-0.04879	3.02957E-73	FALSE	TRUE	oligo	-0.000138006	1
Zic2_MA1629.2	Zic2	MA1629.2	C_Zic2	10834	0.55425	3079	0.49469	2712	0.04199	9.30105E-68	FALSE	TRUE	endo	0.054524	1
Zic3_MA0697.3	Zic3	MA0697.3	C_Zic2	13224	0.45936	4038	0.46294	4112	-0.0071	7.75722E-12	FALSE	TRUE	oligo	-0.000644304	1
Zic3_MA0697.3	Zic3	MA0697.3	C_Zic2	9348	0.67579	2838	0.69454	2982	0.00423	1.21378E-05	FALSE	TRUE	astro	0.012991	1

## Sheet: TF_unique_common_bound_unbound
Sample Level		Astrocytes			Endothelial Cells			Microglia			Oligodendrocytes
name	Bexa_Controls_change	name	Bexa_Controls_change	Whether_unique	name	Bexa_Controls_change	Whether_unique	name	Bexa_Controls_change	Whether_unique	name	Bexa_Controls_change	Whether_unique
Gabpa	-0.18678	Npas4	-0.13012	common	Gabpa	-0.17345	common	Gabpa	-0.21289	common	Zbtb2	-0.13835	common
Zbtb2	-0.16475	Pax2	-0.0951	common	Zbtb2	-0.16708	common	Zbtb2	-0.20149	common	Gabpa	-0.12999	common
CEBPA	-0.12576	Atf3	-0.09257	unique	Hoxd8	-0.11618	unique	Erg	-0.13789	common	Erg	-0.12914	common
Tcfl5	-0.12399	Mitf	-0.08665	common	Foxk1	-0.11553	common	Spi1	-0.12403	common	Elf5	-0.12418	common
Erg	-0.12103	FOS::JUN	-0.08476	unique	Klf12	-0.1142	unique	Ets1	-0.1201	common	Ets1	-0.1129	common
NFKB1	-0.11312	Ptf1A	-0.08302	common	Gata4	-0.10881	unique	CEBPA	-0.11146	unique	Npas4	-0.11125	common
Ets1	-0.10698	Gabpa	-0.07688	common	Crem	-0.10657	common	Elf5	-0.1113	common	Nr2F6	-0.10909	unique
Foxj2	-0.10531	Tcfl5	-0.0765	unique	Gata1	-0.10116	unique	Ikzf3	-0.0964	common	CREB1	-0.10744	unique
Spi1	-0.10028	Jun	-0.07225	common	Hmga1	-0.1004	unique	Mitf	-0.09459	common	NFKB1	-0.10299	common
Elf5	-0.09649	Srebf1	-0.07116	unique	Gata3	-0.10025	unique	Crem	-0.09206	common	Nr2f6	-0.10265	common
Foxk1	-0.09294	Foxj3	-0.06029	common	Foxj3	-0.09955	common	NFKB1	-0.08706	common	Pax2	-0.10097	common
Foxn1	-0.08988	Foxj2	-0.06022	unique	Atf1	-0.09652	unique	Arntl	-0.08368	unique	Ikzf3	-0.09983	common
Ikzf3	-0.07713	Foxl2	-0.05811	unique	Pax4	-0.08819	unique	Stat2	-0.05086	unique	Nr1H2	-0.09864	common
Stat2	-0.05936	Foxk1	-0.05261	common	Erg	-0.08715	common	Egr2	0.06243	unique	Nr1h3	-0.09864	common
SP1	-0.05264	Erg	-0.05253	common	Klf1	-0.08203	unique	Tcf21	0.06352	common	Nr1H4	-0.09864	common
Myc	0.03699	Ets1	-0.0449	common	Ets1	-0.07562	common	Ascl2	0.06398	common	Spi1	-0.09708	common
Tbx6	0.03804	Hoxd3	0.05135	unique	Klf4	-0.06651	common	Lhx1	0.06646	common	Klf4	-0.05655	common
Ascl2	0.0397	Alx1	0.05458	common	Neurod2	0.06726	common	Msgn1	0.07423	common	Ascl2	0.04423	common
Rfx1	0.04262	Dlx2	0.05983	unique	Olig2	0.06726	unique	Neurog1	0.08399	common	Neurog1	0.04633	common
Hic1	0.05382	Dlx5	0.05983	unique	Tcf12	0.06726	unique	Ptf1A	0.08467	common	Tcf21	0.04743	common
Ptf1A	0.05757	Lhx1	0.06046	common	Twist2	0.06726	unique	Bhlha15	0.08977	common	Barhl1	0.04772	common
Msgn1	0.06511	NFYA	0.06199	unique	Neurod2	0.06784	common	Hic1	0.09338	unique	Msgn1	0.04802	common
Neurod2	0.07351	Pdx1	0.06242	unique	Atoh1	0.0689	common	Rfx6	0.09656	unique	Neurod2	0.04915	common
Atoh1	0.0856	Alx4	0.06326	unique	Wt1	0.06971	unique	Rfx1	0.10478	common	Atoh1	0.04999	common
Bhlha15	0.08651	Prrx2	0.0676	unique	Rfx1	0.07237	common	Neurod2	0.10949	common	Pou2f3	0.05879	unique
Neurog1	0.0912	Barhl1	0.07641	common	Tcf3	0.07539	unique	Atoh1	0.13202	common	Atoh1	0.06056	common
Atoh1	0.11229				Ascl2	0.07936	common				Bhlha15	0.0632	common
					Atoh1	0.08249	common				Rfx1	0.09775	common
					Znf281	0.08335	unique
